# Supplementary material for: Metabolomics Analysis of Metabolic Effects of Nicotinamide Phosphoribosyltransferase (NAMPT) Inhibition on Human Cancer Cells
Source: PubMed Central journal article supplement (PMC4259317; doi:10.1371/journal.pone.0114019), 2014-12-08
Supplement: pone.0114019.s005.pdf [file pone.0114019.s005.pdf]

**Oneway Analysis of 1-Aminocyclopropanecarboxylic acid By Label**

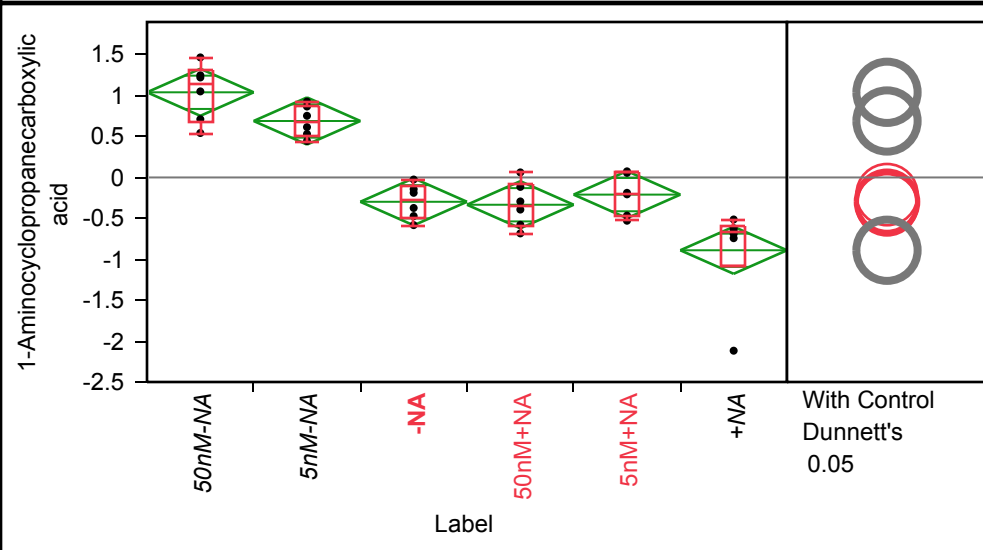

**Quantiles**

| Level   | Minimum  | 10%      | 25%      | Median   | 75%      | 90%      | Maximum  |
|---------|----------|----------|----------|----------|----------|----------|----------|
| 50nM-NA | 0.543127 | 0.543127 | 0.669624 | 1.13685  | 1.303384 | 1.467074 | 1.467074 |
| 5nM-NA  | 0.445404 | 0.445404 | 0.509714 | 0.684544 | 0.882072 | 0.927216 | 0.927216 |
| -NA     | -0.58267 | -0.58267 | -0.49975 | -0.28042 | -0.11382 | -0.02552 | -0.02552 |
| 50nM+NA | -0.68367 | -0.68367 | -0.60502 | -0.34282 | -0.07115 | 0.061642 | 0.061642 |
| 5nM+NA  | -0.52883 | -0.52883 | -0.48178 | -0.19715 | 0.060677 | 0.074526 | 0.074526 |
| +NA     | -2.11749 | -2.11749 | -1.08608 | -0.6728  | -0.59371 | -0.51377 | -0.51377 |

**Oneway Anova**

**Summary of Fit**

|                            |          |
|----------------------------|----------|
| Rsquare                    | 0.813383 |
| Adj Rsquare                | 0.782281 |
| Root Mean Square Error     | 0.34507  |
| Mean of Response           | 5.56e-10 |
| Observations (or Sum Wgts) | 36       |

**Analysis of Variance**

| Source   | DF | Sum of Squares | Mean Square | F Ratio | Prob > F |
|----------|----|----------------|-------------|---------|----------|
| Label    | 5  | 15.569728      | 3.11395     | 26.1515 | <.0001 * |
| Error    | 30 | 3.572202       | 0.11907     |         |          |
| C. Total | 35 | 19.141930      |             |         |          |

**Means for Oneway Anova**

| Level   | Number | Mean    | Std Error | Lower 95% | Upper 95% |
|---------|--------|---------|-----------|-----------|-----------|
| 50nM-NA | 6      | 1.0408  | 0.14087   | 0.753     | 1.328     |
| 5nM-NA  | 6      | 0.6900  | 0.14087   | 0.402     | 0.978     |
| -NA     | 6      | -0.2974 | 0.14087   | -0.585    | -0.0097   |
| 50nM+NA | 6      | -0.3336 | 0.14087   | -0.621    | -0.046    |
| 5nM+NA  | 6      | -0.2098 | 0.14087   | -0.497    | 0.078     |
| +NA     | 6      | -0.8899 | 0.14087   | -1.178    | -0.602    |

Std Error uses a pooled estimate of error variance

**Means Comparisons**

**Comparisons with a control using Dunnett's Method**

**Oneway Analysis of 1-Hexadecyl-2-arachidonoyl-glycerol By Label**

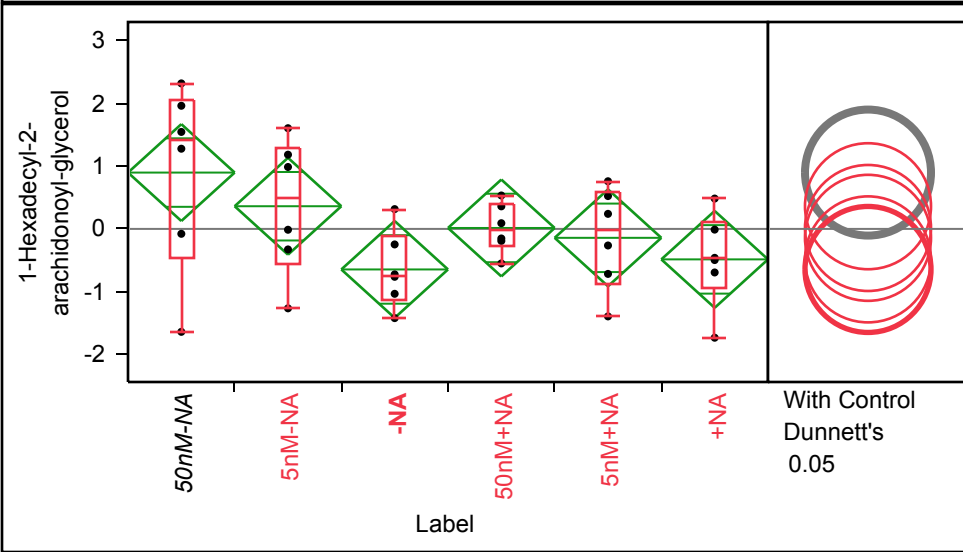

**Quantiles**

| Level   | Minimum  | 10%      | 25%      | Median   | 75%      | 90%      | Maximum  |
|---------|----------|----------|----------|----------|----------|----------|----------|
| 50nM-NA | -1.64164 | -1.64164 | -0.46902 | 1.41281  | 2.053175 | 2.320703 | 2.320703 |
| 5nM-NA  | -1.26671 | -1.26671 | -0.56232 | 0.486967 | 1.28942  | 1.605995 | 1.605995 |
| -NA     | -1.42267 | -1.42267 | -1.13207 | -0.74472 | -0.1069  | 0.31564  | 0.31564  |
| 50nM+NA | -0.55025 | -0.55025 | -0.28134 | -0.03091 | 0.403047 | 0.532881 | 0.532881 |
| 5nM+NA  | -1.39542 | -1.39542 | -0.88714 | -0.01221 | 0.582763 | 0.760084 | 0.760084 |
| +NA     | -1.73549 | -1.73549 | -0.95491 | -0.47915 | 0.112521 | 0.48405  | 0.48405  |

**Oneway Anova**

**Summary of Fit**

|                            |          |
|----------------------------|----------|
| Rsquare                    | 0.273155 |
| Adj Rsquare                | 0.152015 |
| Root Mean Square Error     | 0.926391 |
| Mean of Response           | -5.6e-10 |
| Observations (or Sum Wgts) | 36       |

**Analysis of Variance**

| Source   | DF | Sum of Squares | Mean Square | F Ratio | Prob > F |
|----------|----|----------------|-------------|---------|----------|
| Label    | 5  | 9.675599       | 1.93512     | 2.2549  | 0.0744   |
| Error    | 30 | 25.746002      | 0.85820     |         |          |
| C. Total | 35 | 35.421601      |             |         |          |

**Means for Oneway Anova**

| Level   | Number | Mean     | Std Error | Lower 95% | Upper 95% |
|---------|--------|----------|-----------|-----------|-----------|
| 50nM-NA | 6      | 0.89842  | 0.37820   | 0.126     | 1.6708    |
| 5nM-NA  | 6      | 0.36160  | 0.37820   | -0.411    | 1.1340    |
| -NA     | 6      | -0.64657 | 0.37820   | -1.419    | 0.1258    |
| 50nM+NA | 6      | 0.01481  | 0.37820   | -0.758    | 0.7872    |
| 5nM+NA  | 6      | -0.14230 | 0.37820   | -0.915    | 0.6301    |
| +NA     | 6      | -0.48596 | 0.37820   | -1.258    | 0.2864    |

Std Error uses a pooled estimate of error variance

**Means Comparisons**

**Comparisons with a control using Dunnett's Method**

**Oneway Analysis of 1-Methyladenosine By Label**

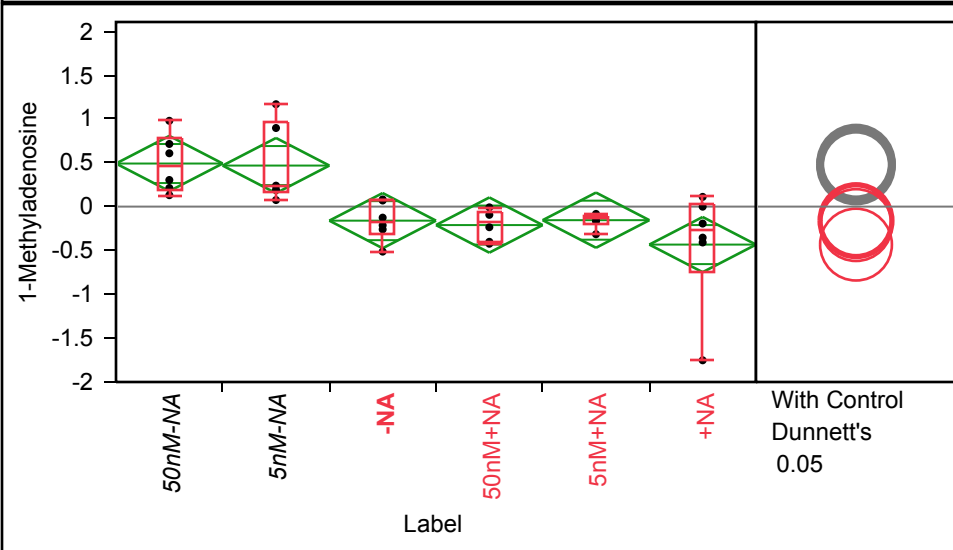

**Quantiles**

| Level   | Minimum  | 10%      | 25%      | Median   | 75%      | 90%      | Maximum  |
|---------|----------|----------|----------|----------|----------|----------|----------|
| 50nM-NA | 0.130223 | 0.130223 | 0.19192  | 0.455732 | 0.780225 | 0.97827  | 0.97827  |
| 5nM-NA  | 0.074568 | 0.074568 | 0.162686 | 0.238575 | 0.963913 | 1.167352 | 1.167352 |
| -NA     | -0.51319 | -0.51319 | -0.32343 | -0.16982 | 0.072525 | 0.081542 | 0.081542 |
| 50nM+NA | -0.42344 | -0.42344 | -0.40693 | -0.16826 | -0.07261 | -0.00861 | -0.00861 |
| 5nM+NA  | -0.31491 | -0.31491 | -0.20366 | -0.12418 | -0.10767 | -0.08328 | -0.08328 |
| +NA     | -1.75251 | -1.75251 | -0.74486 | -0.27371 | 0.026985 | 0.110772 | 0.110772 |

**Oneway Anova**

**Summary of Fit**

|                            |          |
|----------------------------|----------|
| Rsquare                    | 0.510193 |
| Adj Rsquare                | 0.428558 |
| Root Mean Square Error     | 0.377398 |
| Mean of Response           | 2.78e-11 |
| Observations (or Sum Wgts) | 36       |

**Analysis of Variance**

| Source   | DF | Sum of Squares | Mean Square | F Ratio | Prob > F |
|----------|----|----------------|-------------|---------|----------|
| Label    | 5  | 4.4507121      | 0.890142    | 6.2497  | 0.0004 * |
| Error    | 30 | 4.2728806      | 0.142429    |         |          |
| C. Total | 35 | 8.7235928      |             |         |          |

**Means for Oneway Anova**

| Level   | Number | Mean     | Std Error | Lower 95% | Upper 95% |
|---------|--------|----------|-----------|-----------|-----------|
| 50nM-NA | 6      | 0.49111  | 0.15407   | 0.1765    | 0.8058    |
| 5nM-NA  | 6      | 0.46787  | 0.15407   | 0.1532    | 0.7825    |
| -NA     | 6      | -0.16032 | 0.15407   | -0.4750   | 0.1543    |
| 50nM+NA | 6      | -0.21066 | 0.15407   | -0.5253   | 0.1040    |
| 5nM+NA  | 6      | -0.15482 | 0.15407   | -0.4695   | 0.1598    |
| +NA     | 6      | -0.43318 | 0.15407   | -0.7478   | -0.1185   |

Std Error uses a pooled estimate of error variance

**Means Comparisons**

**Comparisons with a control using Dunnett's Method**

**Oneway Analysis of 1-Methyl-Histidine By Label**

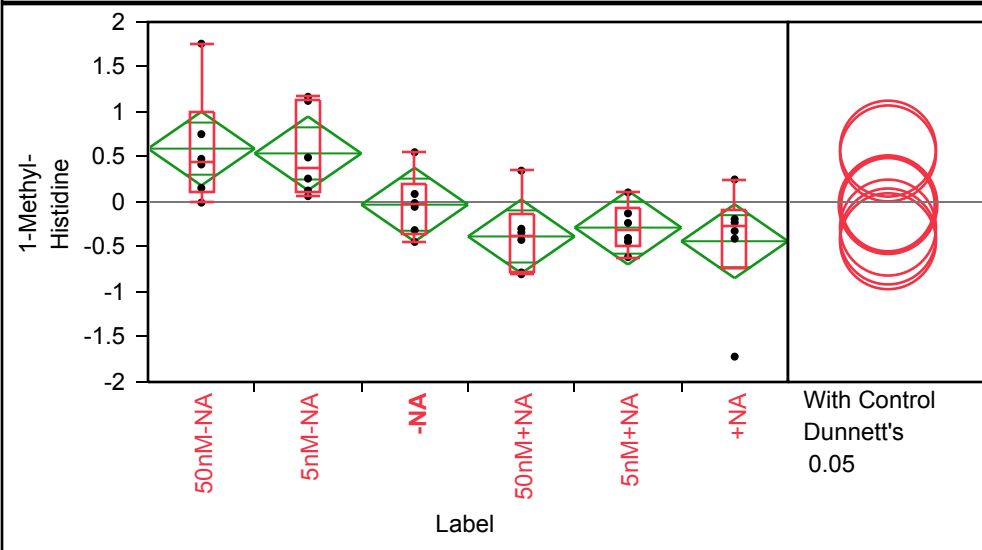

**Quantiles**

| Level   | Minimum  | 10%      | 25%      | Median   | 75%      | 90%      | Maximum  |
|---------|----------|----------|----------|----------|----------|----------|----------|
| 50nM-NA | -0.00727 | -0.00727 | 0.114973 | 0.448367 | 1.005076 | 1.758836 | 1.758836 |
| 5nM-NA  | 0.064976 | 0.064976 | 0.111971 | 0.377074 | 1.134843 | 1.168954 | 1.168954 |
| -NA     | -0.44398 | -0.44398 | -0.34533 | -0.03242 | 0.205235 | 0.553151 | 0.553151 |
| 50nM+NA | -0.80302 | -0.80302 | -0.78785 | -0.38086 | -0.13587 | 0.348058 | 0.348058 |
| 5nM+NA  | -0.6126  | -0.6126  | -0.48398 | -0.31629 | -0.06798 | 0.106279 | 0.106279 |
| +NA     | -1.71824 | -1.71824 | -0.73483 | -0.27552 | -0.07949 | 0.250235 | 0.250235 |

**Oneway Anova**

**Summary of Fit**

|                            |          |
|----------------------------|----------|
| Rsquare                    | 0.467995 |
| Adj Rsquare                | 0.379327 |
| Root Mean Square Error     | 0.491226 |
| Mean of Response           | 2.78e-11 |
| Observations (or Sum Wgts) | 36       |

**Analysis of Variance**

| Source   | DF | Sum of Squares | Mean Square | F Ratio | Prob > F |
|----------|----|----------------|-------------|---------|----------|
| Label    | 5  | 6.368084       | 1.27362     | 5.2781  | 0.0014 * |
| Error    | 30 | 7.239080       | 0.24130     |         |          |
| C. Total | 35 | 13.607164      |             |         |          |

**Means for Oneway Anova**

| Level   | Number | Mean     | Std Error | Lower 95% | Upper 95% |
|---------|--------|----------|-----------|-----------|-----------|
| 50nM-NA | 6      | 0.59297  | 0.20054   | 0.1834    | 1.003     |
| 5nM-NA  | 6      | 0.53986  | 0.20054   | 0.1303    | 0.949     |
| -NA     | 6      | -0.02981 | 0.20054   | -0.4394   | 0.380     |
| 50nM+NA | 6      | -0.38277 | 0.20054   | -0.7923   | 0.027     |
| 5nM+NA  | 6      | -0.28434 | 0.20054   | -0.6939   | 0.125     |
| +NA     | 6      | -0.43591 | 0.20054   | -0.8455   | -0.026    |

Std Error uses a pooled estimate of error variance

**Means Comparisons**

**Comparisons with a control using Dunnnett's Method**

**Oneway Analysis of 2-Aminooctanoic acid By Label**

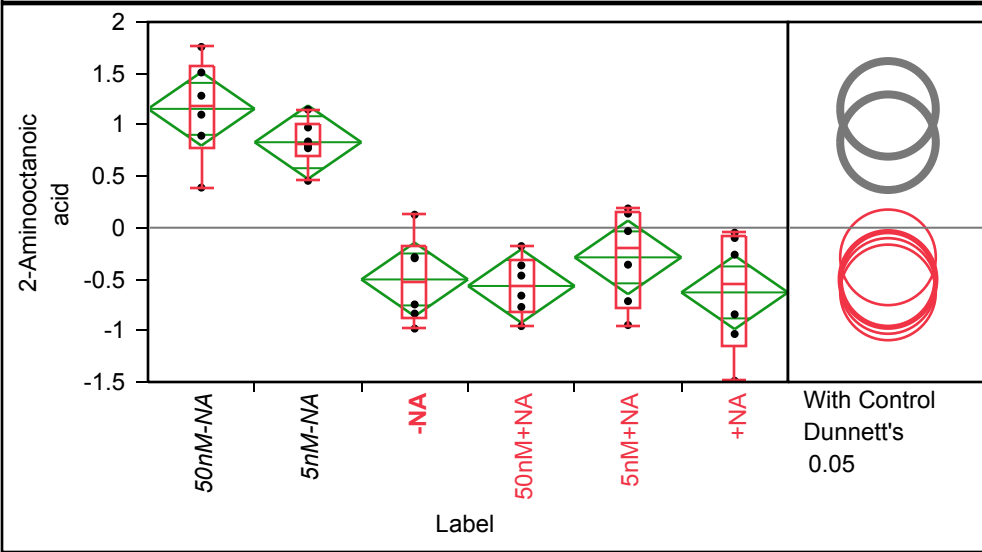

**Quantiles**

| Level   | Minimum  | 10%      | 25%      | Median   | 75%      | 90%      | Maximum  |
|---------|----------|----------|----------|----------|----------|----------|----------|
| 50nM-NA | 0.389922 | 0.389922 | 0.768251 | 1.19119  | 1.571194 | 1.7574   | 1.7574   |
| 5nM-NA  | 0.455962 | 0.455962 | 0.693667 | 0.817574 | 1.017982 | 1.148849 | 1.148849 |
| -NA     | -0.98093 | -0.98093 | -0.87118 | -0.52148 | -0.18296 | 0.126262 | 0.126262 |
| 50nM+NA | -0.95671 | -0.95671 | -0.81703 | -0.56297 | -0.31961 | -0.17901 | -0.17901 |
| 5nM+NA  | -0.94698 | -0.94698 | -0.77229 | -0.19612 | 0.14944  | 0.18688  | 0.18688  |
| +NA     | -1.48788 | -1.48788 | -1.14701 | -0.55232 | -0.08698 | -0.0483  | -0.0483  |

**Oneway Anova**

**Summary of Fit**

|                            |          |
|----------------------------|----------|
| Rsquare                    | 0.770417 |
| Adj Rsquare                | 0.732154 |
| Root Mean Square Error     | 0.428363 |
| Mean of Response           | -3.7e-17 |
| Observations (or Sum Wgts) | 36       |

**Analysis of Variance**

| Source   | DF | Sum of Squares | Mean Square | F Ratio | Prob > F |
|----------|----|----------------|-------------|---------|----------|
| Label    | 5  | 18.472769      | 3.69455     | 20.1344 | <.0001 * |
| Error    | 30 | 5.504846       | 0.18349     |         |          |
| C. Total | 35 | 23.977614      |             |         |          |

**Means for Oneway Anova**

| Level   | Number | Mean    | Std Error | Lower 95% | Upper 95% |
|---------|--------|---------|-----------|-----------|-----------|
| 50nM-NA | 6      | 1.1555  | 0.17488   | 0.7984    | 1.513     |
| 5nM-NA  | 6      | 0.8312  | 0.17488   | 0.4741    | 1.188     |
| -NA     | 6      | -0.5030 | 0.17488   | -0.8602   | -0.146    |
| 50nM+NA | 6      | -0.5664 | 0.17488   | -0.9236   | -0.209    |
| 5nM+NA  | 6      | -0.2882 | 0.17488   | -0.6454   | 0.069     |
| +NA     | 6      | -0.6290 | 0.17488   | -0.9862   | -0.272    |

Std Error uses a pooled estimate of error variance

**Means Comparisons**

**Comparisons with a control using Dunnett's Method**

**Oneway Analysis of 2-deoxyglucose-6-phosphate By Label**

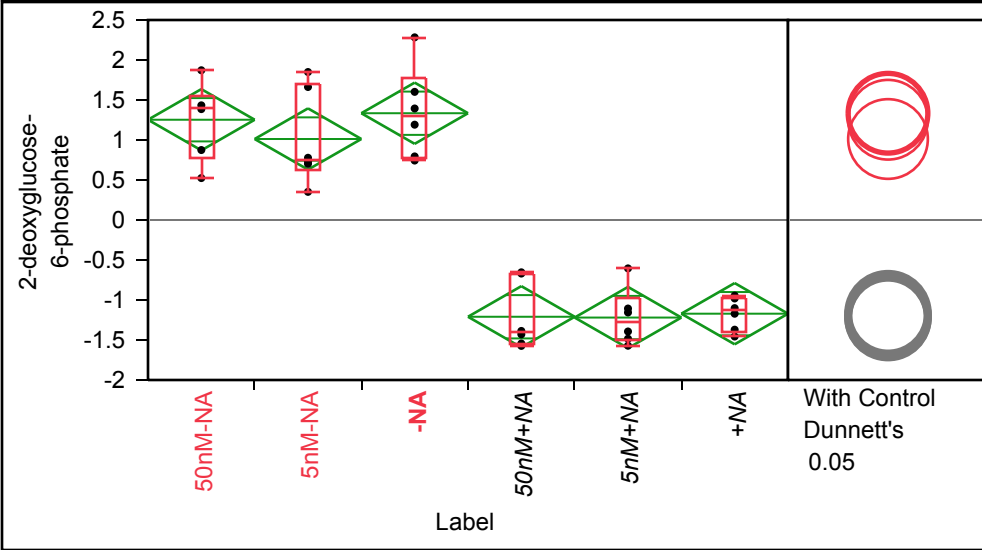

**Quantiles**

| Level   | Minimum  | 10%      | 25%      | Median   | 75%      | 90%      | Maximum  |
|---------|----------|----------|----------|----------|----------|----------|----------|
| 50nM-NA | 0.524052 | 0.524052 | 0.786842 | 1.408044 | 1.542795 | 1.871559 | 1.871559 |
| 5nM-NA  | 0.351829 | 0.351829 | 0.614463 | 0.754141 | 1.709205 | 1.849596 | 1.849596 |
| -NA     | 0.7432   | 0.7432   | 0.78168  | 1.292636 | 1.771999 | 2.283118 | 2.283118 |
| 50nM+NA | -1.57369 | -1.57369 | -1.55162 | -1.40789 | -0.6656  | -0.65407 | -0.65407 |
| 5nM+NA  | -1.57143 | -1.57143 | -1.50599 | -1.27478 | -0.98125 | -0.60508 | -0.60508 |
| +NA     | -1.45642 | -1.45642 | -1.39239 | -1.13659 | -0.97198 | -0.94566 | -0.94566 |

**Oneway Anova**

**Summary of Fit**

|                            |          |
|----------------------------|----------|
| Rsquare                    | 0.891953 |
| Adj Rsquare                | 0.873945 |
| Root Mean Square Error     | 0.459061 |
| Mean of Response           | 5.556e-9 |
| Observations (or Sum Wgts) | 36       |

**Analysis of Variance**

| Source   | DF | Sum of Squares | Mean Square | F Ratio | Prob > F |
|----------|----|----------------|-------------|---------|----------|
| Label    | 5  | 52.190530      | 10.4381     | 49.5313 | <.0001 * |
| Error    | 30 | 6.322123       | 0.2107      |         |          |
| C. Total | 35 | 58.512654      |             |         |          |

**Means for Oneway Anova**

| Level   | Number | Mean    | Std Error | Lower 95% | Upper 95% |
|---------|--------|---------|-----------|-----------|-----------|
| 50nM-NA | 6      | 1.2532  | 0.18741   | 0.870     | 1.636     |
| 5nM-NA  | 6      | 1.0124  | 0.18741   | 0.630     | 1.395     |
| -NA     | 6      | 1.3346  | 0.18741   | 0.952     | 1.717     |
| 50nM+NA | 6      | -1.2095 | 0.18741   | -1.592    | -0.827    |
| 5nM+NA  | 6      | -1.2195 | 0.18741   | -1.602    | -0.837    |
| +NA     | 6      | -1.1712 | 0.18741   | -1.554    | -0.788    |

Std Error uses a pooled estimate of error variance

**Means Comparisons**

**Comparisons with a control using Dunnnett's Method**

**Oneway Analysis of 2-Hydroxy-2-methylbutanedioic acid By Label**

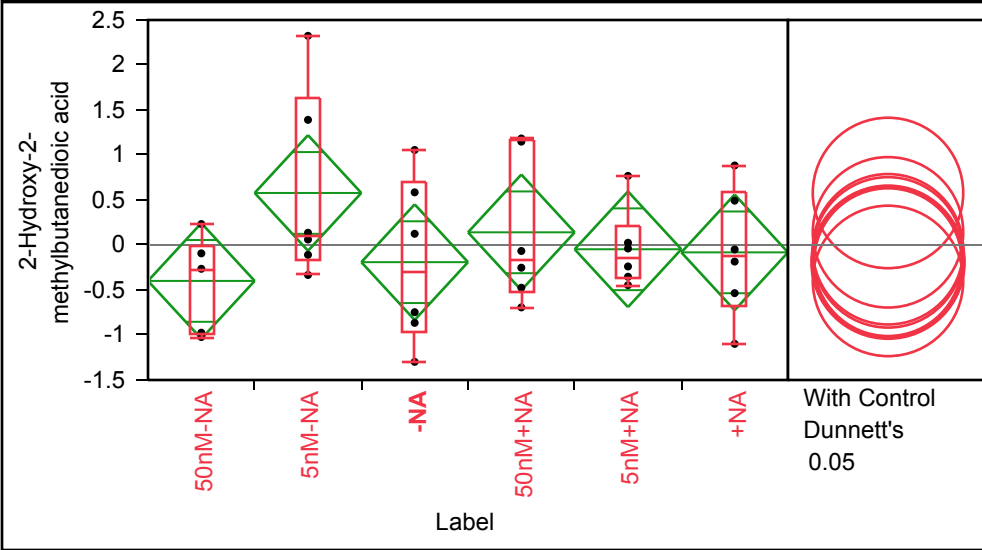

**Quantiles**

| Level   | Minimum  | 10%      | 25%      | Median   | 75%      | 90%      | Maximum  |
|---------|----------|----------|----------|----------|----------|----------|----------|
| 50nM-NA | -1.0226  | -1.0226  | -0.98635 | -0.26869 | -0.01156 | 0.232802 | 0.232802 |
| 5nM-NA  | -0.33291 | -0.33291 | -0.16538 | 0.098472 | 1.623777 | 2.323914 | 2.323914 |
| -NA     | -1.29817 | -1.29817 | -0.9734  | -0.31104 | 0.702719 | 1.055813 | 1.055813 |
| 50nM+NA | -0.69324 | -0.69324 | -0.52923 | -0.15942 | 1.157137 | 1.183358 | 1.183358 |
| 5nM+NA  | -0.44653 | -0.44653 | -0.37621 | -0.13873 | 0.210597 | 0.767744 | 0.767744 |
| +NA     | -1.09835 | -1.09835 | -0.67584 | -0.11696 | 0.590577 | 0.883569 | 0.883569 |

**Oneway Anova**

**Summary of Fit**

|                            |          |
|----------------------------|----------|
| Rsquare                    | 0.15839  |
| Adj Rsquare                | 0.018121 |
| Root Mean Square Error     | 0.770518 |
| Mean of Response           | 2.78e-10 |
| Observations (or Sum Wgts) | 36       |

**Analysis of Variance**

| Source   | DF | Sum of Squares | Mean Square | F Ratio | Prob > F |
|----------|----|----------------|-------------|---------|----------|
| Label    | 5  | 3.351988       | 0.670398    | 1.1292  | 0.3664   |
| Error    | 30 | 17.810943      | 0.593698    |         |          |
| C. Total | 35 | 21.162931      |             |         |          |

**Means for Oneway Anova**

| Level   | Number | Mean     | Std Error | Lower 95% | Upper 95% |
|---------|--------|----------|-----------|-----------|-----------|
| 50nM-NA | 6      | -0.39908 | 0.31456   | -1.041    | 0.2433    |
| 5nM-NA  | 6      | 0.57814  | 0.31456   | -0.064    | 1.2206    |
| -NA     | 6      | -0.19076 | 0.31456   | -0.833    | 0.4517    |
| 50nM+NA | 6      | 0.14085  | 0.31456   | -0.502    | 0.7833    |
| 5nM+NA  | 6      | -0.04736 | 0.31456   | -0.690    | 0.5951    |
| +NA     | 6      | -0.08180 | 0.31456   | -0.724    | 0.5606    |

Std Error uses a pooled estimate of error variance

**Means Comparisons**

**Comparisons with a control using Dunnett's Method**

**Oneway Analysis of 2-hydroxyglutarate By Label**

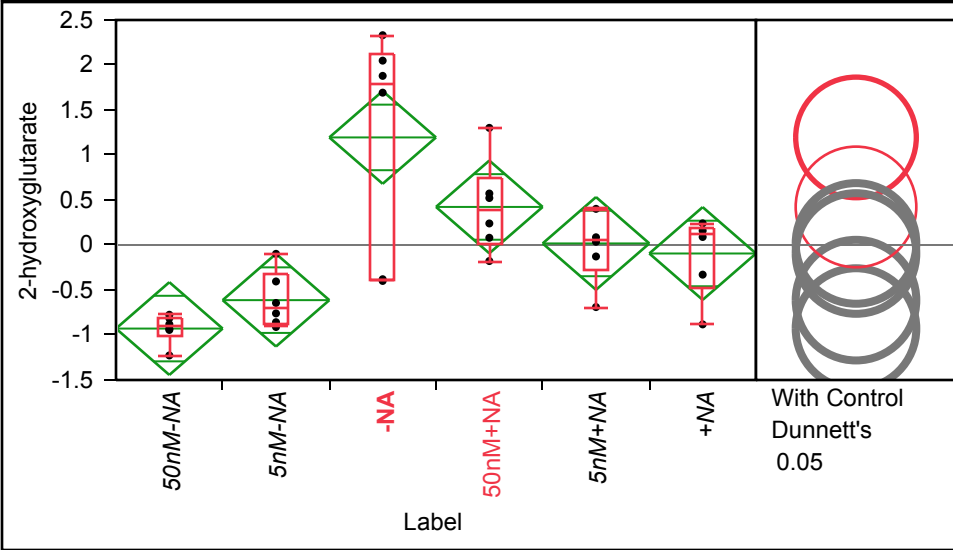

**Quantiles**

| Level   | Minimum  | 10%      | 25%      | Median   | 75%      | 90%      | Maximum  |
|---------|----------|----------|----------|----------|----------|----------|----------|
| 50nM-NA | -1.22727 | -1.22727 | -1.01465 | -0.90553 | -0.80427 | -0.77513 | -0.77513 |
| 5nM-NA  | -0.91106 | -0.91106 | -0.87114 | -0.70197 | -0.32836 | -0.09831 | -0.09831 |
| -NA     | -0.3993  | -0.3993  | -0.38512 | 1.785905 | 2.119122 | 2.330938 | 2.330938 |
| 50nM+NA | -0.17829 | -0.17829 | 0.015715 | 0.380797 | 0.754501 | 1.301383 | 1.301383 |
| 5nM+NA  | -0.68977 | -0.68977 | -0.26806 | 0.060796 | 0.399448 | 0.401575 | 0.401575 |
| +NA     | -0.88213 | -0.88213 | -0.46763 | 0.122871 | 0.179554 | 0.240527 | 0.240527 |

**Oneway Anova**

**Summary of Fit**

|                            |          |
|----------------------------|----------|
| Rsquare                    | 0.599297 |
| Adj Rsquare                | 0.532513 |
| Root Mean Square Error     | 0.617806 |
| Mean of Response           | -5.6e-10 |
| Observations (or Sum Wgts) | 36       |

**Analysis of Variance**

| Source   | DF | Sum of Squares | Mean Square | F Ratio | Prob > F |
|----------|----|----------------|-------------|---------|----------|
| Label    | 5  | 17.125542      | 3.42511     | 8.9737  | <.0001 * |
| Error    | 30 | 11.450532      | 0.38168     |         |          |
| C. Total | 35 | 28.576074      |             |         |          |

**Means for Oneway Anova**

| Level   | Number | Mean    | Std Error | Lower 95% | Upper 95% |
|---------|--------|---------|-----------|-----------|-----------|
| 50nM-NA | 6      | -0.9285 | 0.25222   | -1.444    | -0.413    |
| 5nM-NA  | 6      | -0.6127 | 0.25222   | -1.128    | -0.098    |
| -NA     | 6      | 1.1953  | 0.25222   | 0.680     | 1.710     |
| 50nM+NA | 6      | 0.4229  | 0.25222   | -0.092    | 0.938     |
| 5nM+NA  | 6      | 0.0174  | 0.25222   | -0.498    | 0.533     |
| +NA     | 6      | -0.0943 | 0.25222   | -0.609    | 0.421     |

Std Error uses a pooled estimate of error variance

**Means Comparisons**

**Comparisons with a control using Dunnett's Method**



**Oneway Analysis of 2-Isopropylmalic acid By Label**

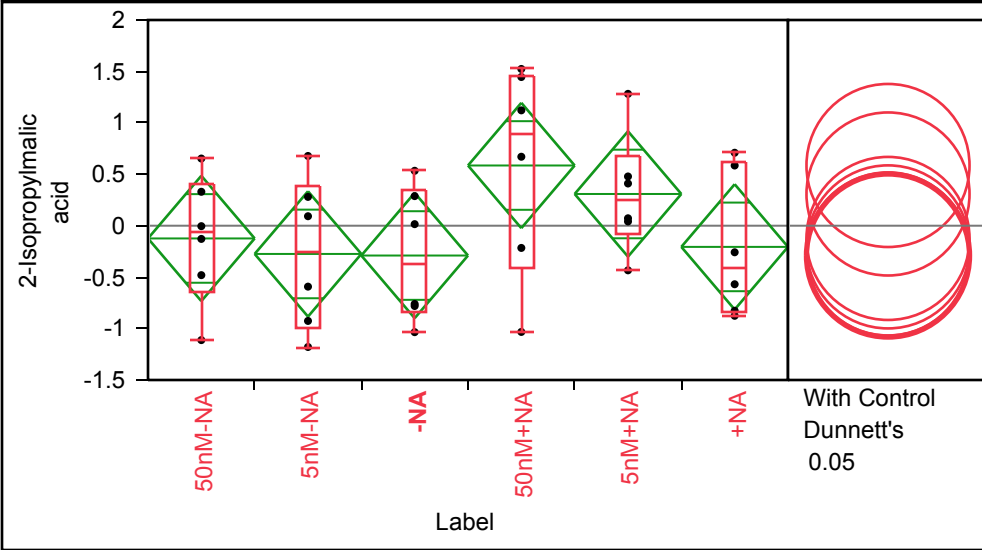

**Quantiles**

| Level   | Minimum  | 10%      | 25%      | Median   | 75%      | 90%      | Maximum  |
|---------|----------|----------|----------|----------|----------|----------|----------|
| 50nM-NA | -1.11205 | -1.11205 | -0.63848 | -0.06638 | 0.410731 | 0.653001 | 0.653001 |
| 5nM-NA  | -1.17917 | -1.17917 | -0.98911 | -0.25008 | 0.379675 | 0.678017 | 0.678017 |
| -NA     | -1.03494 | -1.03494 | -0.84422 | -0.37272 | 0.34939  | 0.534017 | 0.534017 |
| 50nM+NA | -1.03267 | -1.03267 | -0.42019 | 0.896064 | 1.4652   | 1.523924 | 1.523924 |
| 5nM+NA  | -0.43367 | -0.43367 | -0.07735 | 0.241331 | 0.679523 | 1.281893 | 1.281893 |
| +NA     | -0.87586 | -0.87586 | -0.83917 | -0.41371 | 0.616308 | 0.709369 | 0.709369 |

**Oneway Anova**

**Summary of Fit**

|                            |          |
|----------------------------|----------|
| Rsquare                    | 0.197029 |
| Adj Rsquare                | 0.0632   |
| Root Mean Square Error     | 0.730699 |
| Mean of Response           | 2.78e-11 |
| Observations (or Sum Wgts) | 36       |

**Analysis of Variance**

| Source   | DF | Sum of Squares | Mean Square | F Ratio | Prob > F |
|----------|----|----------------|-------------|---------|----------|
| Label    | 5  | 3.930320       | 0.786064    | 1.4722  | 0.2282   |
| Error    | 30 | 16.017643      | 0.533921    |         |          |
| C. Total | 35 | 19.947963      |             |         |          |

**Means for Oneway Anova**

| Level   | Number | Mean     | Std Error | Lower 95% | Upper 95% |
|---------|--------|----------|-----------|-----------|-----------|
| 50nM-NA | 6      | -0.12374 | 0.29831   | -0.7330   | 0.4855    |
| 5nM-NA  | 6      | -0.27447 | 0.29831   | -0.8837   | 0.3348    |
| -NA     | 6      | -0.28986 | 0.29831   | -0.8991   | 0.3194    |
| 50nM+NA | 6      | 0.58550  | 0.29831   | -0.0237   | 1.1947    |
| 5nM+NA  | 6      | 0.30851  | 0.29831   | -0.3007   | 0.9177    |
| +NA     | 6      | -0.20593 | 0.29831   | -0.8152   | 0.4033    |

Std Error uses a pooled estimate of error variance

**Means Comparisons**

**Comparisons with a control using Dunnett's Method**

**Oneway Analysis of 2-keto-isovalerate By Label**

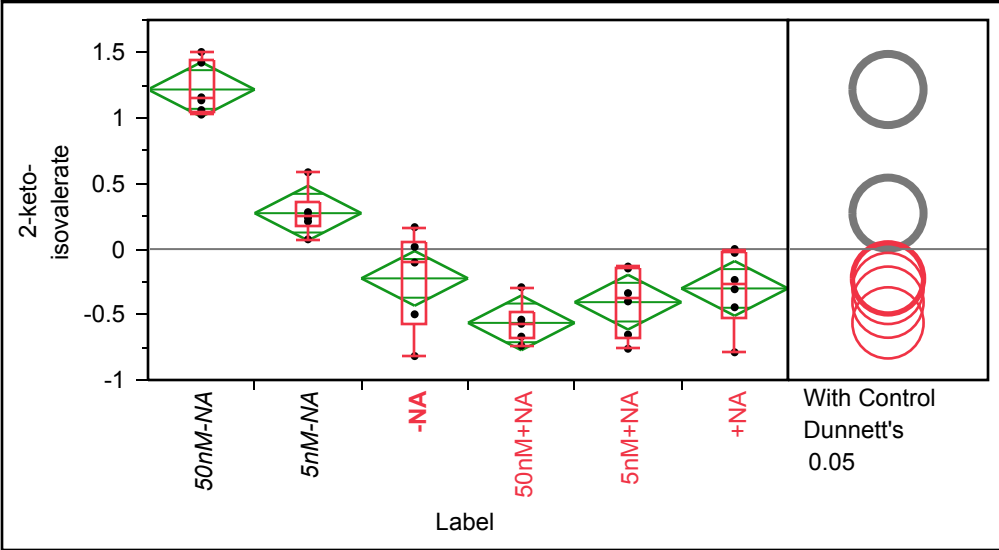

**Quantiles**

| Level   | Minimum  | 10%      | 25%      | Median   | 75%      | 90%      | Maximum  |
|---------|----------|----------|----------|----------|----------|----------|----------|
| 50nM-NA | 1.027225 | 1.027225 | 1.053202 | 1.147742 | 1.44464  | 1.505459 | 1.505459 |
| 5nM-NA  | 0.07463  | 0.07463  | 0.177163 | 0.245615 | 0.358231 | 0.58668  | 0.58668  |
| -NA     | -0.81736 | -0.81736 | -0.57801 | -0.10572 | 0.054879 | 0.167516 | 0.167516 |
| 50nM+NA | -0.73835 | -0.73835 | -0.68632 | -0.57204 | -0.4774  | -0.29142 | -0.29142 |
| 5nM+NA  | -0.76126 | -0.76126 | -0.68031 | -0.36812 | -0.14433 | -0.13358 | -0.13358 |
| +NA     | -0.78852 | -0.78852 | -0.53047 | -0.27127 | -0.02127 | 0.000352 | 0.000352 |

**Oneway Anova**

**Summary of Fit**

|                            |          |
|----------------------------|----------|
| Rsquare                    | 0.874341 |
| Adj Rsquare                | 0.853398 |
| Root Mean Square Error     | 0.250545 |
| Mean of Response           | 2.78e-11 |
| Observations (or Sum Wgts) | 36       |

**Analysis of Variance**

| Source   | DF | Sum of Squares | Mean Square | F Ratio | Prob > F |
|----------|----|----------------|-------------|---------|----------|
| Label    | 5  | 13.103285      | 2.62066     | 41.7485 | <.0001 * |
| Error    | 30 | 1.883177       | 0.06277     |         |          |
| C. Total | 35 | 14.986461      |             |         |          |

**Means for Oneway Anova**

| Level   | Number | Mean    | Std Error | Lower 95% | Upper 95% |
|---------|--------|---------|-----------|-----------|-----------|
| 50nM-NA | 6      | 1.2191  | 0.10228   | 1.010     | 1.428     |
| 5nM-NA  | 6      | 0.2743  | 0.10228   | 0.065     | 0.483     |
| -NA     | 6      | -0.2237 | 0.10228   | -0.433    | -0.015    |
| 50nM+NA | 6      | -0.5637 | 0.10228   | -0.773    | -0.355    |
| 5nM+NA  | 6      | -0.4054 | 0.10228   | -0.614    | -0.196    |
| +NA     | 6      | -0.3006 | 0.10228   | -0.509    | -0.092    |

Std Error uses a pooled estimate of error variance

**Means Comparisons**

**Comparisons with a control using Dunnnett's Method**

**Oneway Analysis of 2-oxobutanoate By Label**

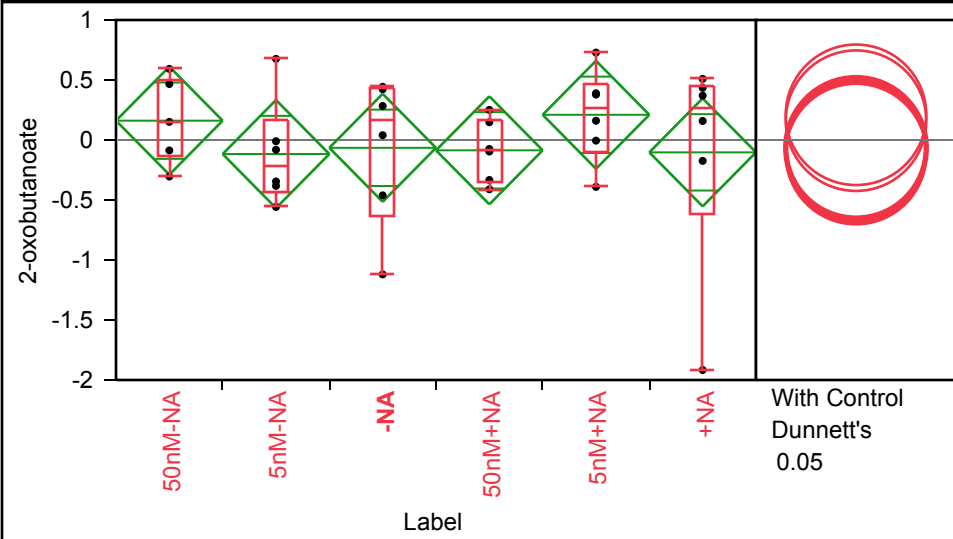

**Quantiles**

| Level   | Minimum  | 10%      | 25%      | Median   | 75%      | 90%      | Maximum  |
|---------|----------|----------|----------|----------|----------|----------|----------|
| 50nM-NA | -0.30433 | -0.30433 | -0.14141 | 0.149449 | 0.497914 | 0.592478 | 0.592478 |
| 5nM-NA  | -0.558   | -0.558   | -0.42653 | -0.21327 | 0.16127  | 0.67591  | 0.67591  |
| -NA     | -1.1199  | -1.1199  | -0.62608 | 0.161693 | 0.42829  | 0.443213 | 0.443213 |
| 50nM+NA | -0.41071 | -0.41071 | -0.35269 | -0.08542 | 0.173724 | 0.250904 | 0.250904 |
| 5nM+NA  | -0.39055 | -0.39055 | -0.10167 | 0.269167 | 0.474117 | 0.728516 | 0.728516 |
| +NA     | -1.9166  | -1.9166  | -0.60966 | 0.26453  | 0.453399 | 0.509255 | 0.509255 |

**Oneway Anova**

**Summary of Fit**

|                            |          |
|----------------------------|----------|
| Rsquare                    | 0.067814 |
| Adj Rsquare                | -0.08755 |
| Root Mean Square Error     | 0.539766 |
| Mean of Response           | -6.2e-18 |
| Observations (or Sum Wgts) | 36       |

**Analysis of Variance**

| Source   | DF | Sum of Squares | Mean Square | F Ratio | Prob > F |
|----------|----|----------------|-------------|---------|----------|
| Label    | 5  | 0.6358458      | 0.127169    | 0.4365  | 0.8195   |
| Error    | 30 | 8.7404339      | 0.291348    |         |          |
| C. Total | 35 | 9.3762797      |             |         |          |

**Means for Oneway Anova**

| Level   | Number | Mean     | Std Error | Lower 95% | Upper 95% |
|---------|--------|----------|-----------|-----------|-----------|
| 50nM-NA | 6      | 0.16106  | 0.22036   | -0.2890   | 0.61109   |
| 5nM-NA  | 6      | -0.11693 | 0.22036   | -0.5670   | 0.33310   |
| -NA     | 6      | -0.06524 | 0.22036   | -0.5153   | 0.38479   |
| 50nM+NA | 6      | -0.08600 | 0.22036   | -0.5360   | 0.36403   |
| 5nM+NA  | 6      | 0.21004  | 0.22036   | -0.2400   | 0.66007   |
| +NA     | 6      | -0.10292 | 0.22036   | -0.5530   | 0.34711   |

Std Error uses a pooled estimate of error variance

**Means Comparisons**

**Comparisons with a control using Dunnnett's Method**

**Oneway Analysis of 3-phospho-serine By Label**

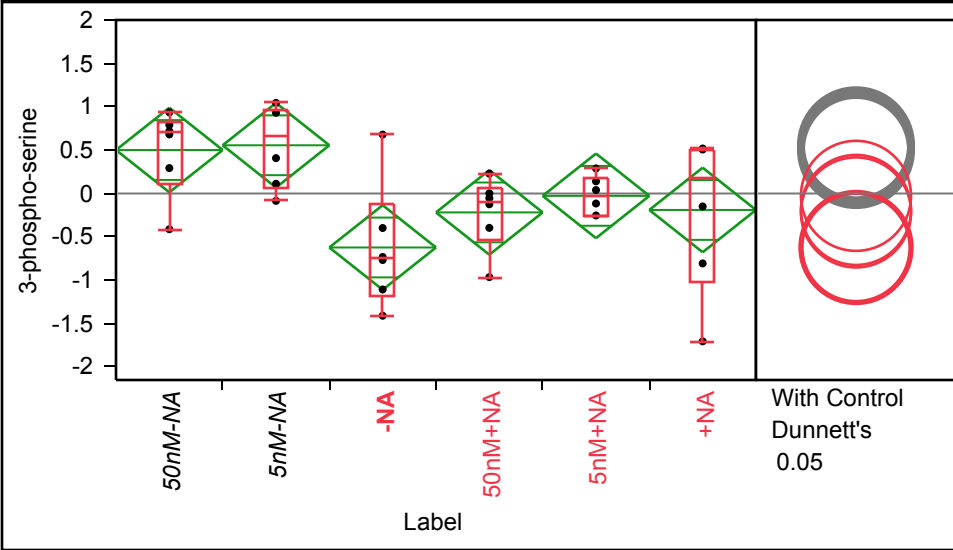

**Quantiles**

| Level   | Minimum  | 10%      | 25%      | Median   | 75%      | 90%      | Maximum  |
|---------|----------|----------|----------|----------|----------|----------|----------|
| 50nM-NA | -0.41291 | -0.41291 | 0.117149 | 0.701611 | 0.829122 | 0.93808  | 0.93808  |
| 5nM-NA  | -0.08484 | -0.08484 | 0.062844 | 0.66861  | 0.961357 | 1.047269 | 1.047269 |
| -NA     | -1.41302 | -1.41302 | -1.18544 | -0.75135 | -0.12915 | 0.680662 | 0.680662 |
| 50nM+NA | -0.96661 | -0.96661 | -0.53948 | -0.08942 | 0.058786 | 0.228976 | 0.228976 |
| 5nM+NA  | -0.26358 | -0.26358 | -0.25634 | -0.03812 | 0.177967 | 0.289527 | 0.289527 |
| +NA     | -1.70898 | -1.70898 | -1.03359 | 0.174139 | 0.511285 | 0.519995 | 0.519995 |

**Oneway Anova**

**Summary of Fit**

|                            |          |
|----------------------------|----------|
| Rsquare                    | 0.376354 |
| Adj Rsquare                | 0.272413 |
| Root Mean Square Error     | 0.586298 |
| Mean of Response           | -5.6e-11 |
| Observations (or Sum Wgts) | 36       |

**Analysis of Variance**

| Source   | DF | Sum of Squares | Mean Square | F Ratio | Prob > F |
|----------|----|----------------|-------------|---------|----------|
| Label    | 5  | 6.223224       | 1.24464     | 3.6208  | 0.0111 * |
| Error    | 30 | 10.312348      | 0.34374     |         |          |
| C. Total | 35 | 16.535572      |             |         |          |

**Means for Oneway Anova**

| Level   | Number | Mean     | Std Error | Lower 95% | Upper 95% |
|---------|--------|----------|-----------|-----------|-----------|
| 50nM-NA | 6      | 0.50250  | 0.23936   | 0.014     | 0.991     |
| 5nM-NA  | 6      | 0.55741  | 0.23936   | 0.069     | 1.046     |
| -NA     | 6      | -0.62395 | 0.23936   | -1.113    | -0.135    |
| 50nM+NA | 6      | -0.21859 | 0.23936   | -0.707    | 0.270     |
| 5nM+NA  | 6      | -0.02724 | 0.23936   | -0.516    | 0.462     |
| +NA     | 6      | -0.19013 | 0.23936   | -0.679    | 0.299     |

Std Error uses a pooled estimate of error variance

**Means Comparisons**

**Comparisons with a control using Dunnnett's Method**

**Oneway Analysis of 4-aminobutyrate By Label**

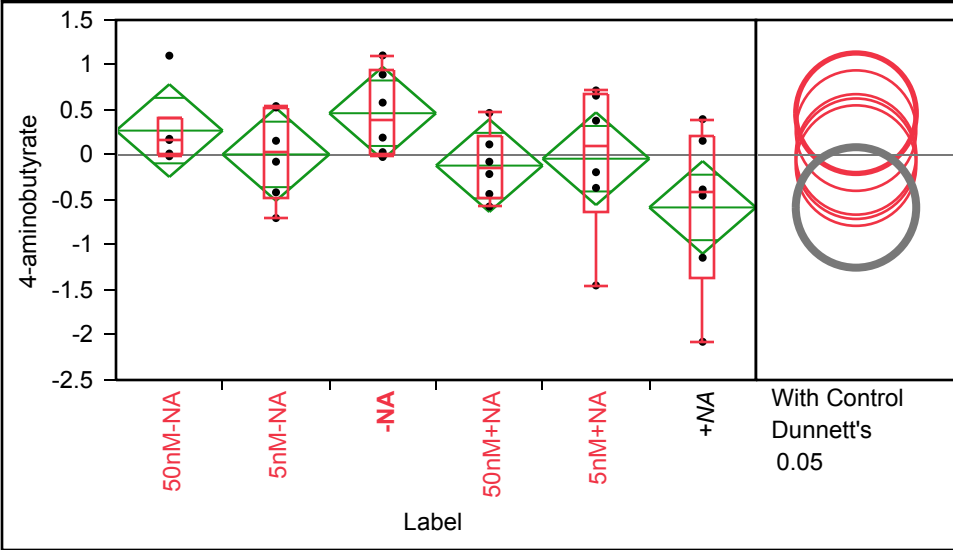

**Quantiles**

| Level   | Minimum  | 10%      | 25%      | Median   | 75%      | 90%      | Maximum  |
|---------|----------|----------|----------|----------|----------|----------|----------|
| 50nM-NA | -0.014   | -0.014   | 0.008383 | 0.170562 | 0.410526 | 1.103667 | 1.103667 |
| 5nM-NA  | -0.70091 | -0.70091 | -0.48645 | 0.041806 | 0.532044 | 0.543134 | 0.543134 |
| -NA     | -0.02191 | -0.02191 | 0.018111 | 0.387709 | 0.946903 | 1.106217 | 1.106217 |
| 50nM+NA | -0.57263 | -0.57263 | -0.46792 | -0.14319 | 0.205175 | 0.467237 | 0.467237 |
| 5nM+NA  | -1.44935 | -1.44935 | -0.63642 | 0.095179 | 0.673889 | 0.717467 | 0.717467 |
| +NA     | -2.07536 | -2.07536 | -1.3749  | -0.41746 | 0.217874 | 0.398193 | 0.398193 |

**Oneway Anova**

**Summary of Fit**

|                            |          |
|----------------------------|----------|
| Rsquare                    | 0.252781 |
| Adj Rsquare                | 0.128244 |
| Root Mean Square Error     | 0.617024 |
| Mean of Response           | -8.3e-10 |
| Observations (or Sum Wgts) | 36       |

**Analysis of Variance**

| Source   | DF | Sum of Squares | Mean Square | F Ratio | Prob > F |
|----------|----|----------------|-------------|---------|----------|
| Label    | 5  | 3.863862       | 0.772772    | 2.0298  | 0.1028   |
| Error    | 30 | 11.421562      | 0.380719    |         |          |
| C. Total | 35 | 15.285424      |             |         |          |

**Means for Oneway Anova**

| Level   | Number | Mean     | Std Error | Lower 95% | Upper 95% |
|---------|--------|----------|-----------|-----------|-----------|
| 50nM-NA | 6      | 0.27102  | 0.25190   | -0.243    | 0.7855    |
| 5nM-NA  | 6      | 0.00654  | 0.25190   | -0.508    | 0.5210    |
| -NA     | 6      | 0.46416  | 0.25190   | -0.050    | 0.9786    |
| 50nM+NA | 6      | -0.11783 | 0.25190   | -0.632    | 0.3966    |
| 5nM+NA  | 6      | -0.04127 | 0.25190   | -0.556    | 0.4732    |
| +NA     | 6      | -0.58262 | 0.25190   | -1.097    | -0.0682   |

Std Error uses a pooled estimate of error variance

**Means Comparisons**

**Comparisons with a control using Dunnett's Method**

**Oneway Analysis of 4-Aminomethylpyrimidine By Label**

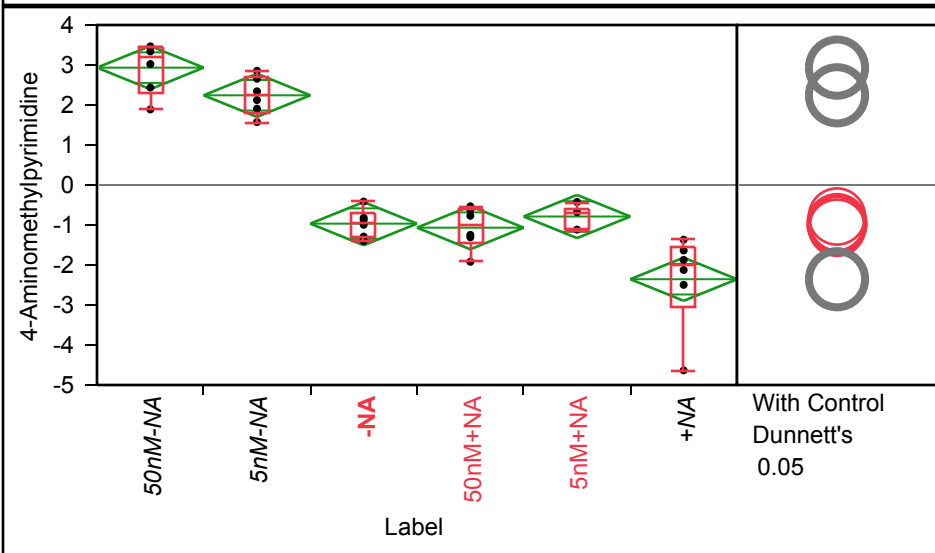

**Quantiles**

| Level   | Minimum  | 10%      | 25%      | Median   | 75%      | 90%      | Maximum  |
|---------|----------|----------|----------|----------|----------|----------|----------|
| 50nM-NA | 1.88933  | 1.88933  | 2.300626 | 3.181083 | 3.452527 | 3.465959 | 3.465959 |
| 5nM-NA  | 1.572658 | 1.572658 | 1.822614 | 2.23159  | 2.706501 | 2.854819 | 2.854819 |
| -NA     | -1.40077 | -1.40077 | -1.3174  | -0.9361  | -0.71875 | -0.41379 | -0.41379 |
| 50nM+NA | -1.91928 | -1.91928 | -1.46013 | -1.0078  | -0.60314 | -0.53361 | -0.53361 |
| 5nM+NA  | -1.13901 | -1.13901 | -1.12101 | -0.68402 | -0.61541 | -0.42513 | -0.42513 |
| +NA     | -4.63359 | -4.63359 | -3.03039 | -1.99907 | -1.56956 | -1.36759 | -1.36759 |

**Oneway Anova**

**Summary of Fit**

|                            |          |
|----------------------------|----------|
| Rsquare                    | 0.912502 |
| Adj Rsquare                | 0.897919 |
| Root Mean Square Error     | 0.647703 |
| Mean of Response           | 2.778e-9 |
| Observations (or Sum Wgts) | 36       |

**Analysis of Variance**

| Source   | DF | Sum of Squares | Mean Square | F Ratio | Prob > F |
|----------|----|----------------|-------------|---------|----------|
| Label    | 5  | 131.25256      | 26.2505     | 62.5729 | <.0001 * |
| Error    | 30 | 12.58556       | 0.4195      |         |          |
| C. Total | 35 | 143.83812      |             |         |          |

**Means for Oneway Anova**

| Level   | Number | Mean    | Std Error | Lower 95% | Upper 95% |
|---------|--------|---------|-----------|-----------|-----------|
| 50nM-NA | 6      | 2.9339  | 0.26442   | 2.394     | 3.474     |
| 5nM-NA  | 6      | 2.2423  | 0.26442   | 1.702     | 2.782     |
| -NA     | 6      | -0.9661 | 0.26442   | -1.506    | -0.426    |
| 50nM+NA | 6      | -1.0670 | 0.26442   | -1.607    | -0.527    |
| 5nM+NA  | 6      | -0.7877 | 0.26442   | -1.328    | -0.248    |
| +NA     | 6      | -2.3554 | 0.26442   | -2.895    | -1.815    |

Std Error uses a pooled estimate of error variance

**Means Comparisons**

**Comparisons with a control using Dunnett's Method**

**Oneway Analysis of 4-Pyridoxic acid By Label**

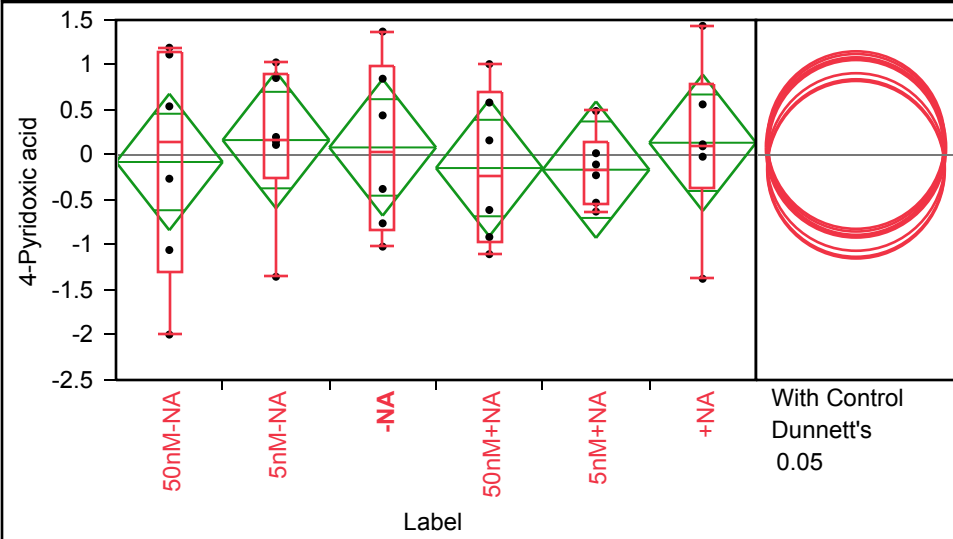

**Quantiles**

| Level   | Minimum  | 10%      | 25%      | Median   | 75%      | 90%      | Maximum  |
|---------|----------|----------|----------|----------|----------|----------|----------|
| 50nM-NA | -1.99557 | -1.99557 | -1.29075 | 0.138434 | 1.135262 | 1.191952 | 1.191952 |
| 5nM-NA  | -1.35279 | -1.35279 | -0.25417 | 0.175735 | 0.89873  | 1.028714 | 1.028714 |
| -NA     | -1.01838 | -1.01838 | -0.82394 | 0.031405 | 0.978496 | 1.371441 | 1.371441 |
| 50nM+NA | -1.10215 | -1.10215 | -0.95932 | -0.2243  | 0.689529 | 1.009565 | 1.009565 |
| 5nM+NA  | -0.62872 | -0.62872 | -0.55476 | -0.16522 | 0.13702  | 0.489375 | 0.489375 |
| +NA     | -1.37554 | -1.37554 | -0.35818 | 0.107579 | 0.780379 | 1.434624 | 1.434624 |

**Oneway Anova**

**Summary of Fit**

|                            |          |
|----------------------------|----------|
| Rsquare                    | 0.025204 |
| Adj Rsquare                | -0.13726 |
| Root Mean Square Error     | 0.909238 |
| Mean of Response           | -2.8e-10 |
| Observations (or Sum Wgts) | 36       |

**Analysis of Variance**

| Source   | DF | Sum of Squares | Mean Square | F Ratio | Prob > F |
|----------|----|----------------|-------------|---------|----------|
| Label    | 5  | 0.641265       | 0.128253    | 0.1551  | 0.9768   |
| Error    | 30 | 24.801391      | 0.826713    |         |          |
| C. Total | 35 | 25.442656      |             |         |          |

**Means for Oneway Anova**

| Level   | Number | Mean     | Std Error | Lower 95% | Upper 95% |
|---------|--------|----------|-----------|-----------|-----------|
| 50nM-NA | 6      | -0.07770 | 0.37119   | -0.8358   | 0.68038   |
| 5nM-NA  | 6      | 0.16581  | 0.37119   | -0.5923   | 0.92389   |
| -NA     | 6      | 0.08404  | 0.37119   | -0.6740   | 0.84212   |
| 50nM+NA | 6      | -0.14501 | 0.37119   | -0.9031   | 0.61307   |
| 5nM+NA  | 6      | -0.16339 | 0.37119   | -0.9215   | 0.59469   |
| +NA     | 6      | 0.13625  | 0.37119   | -0.6218   | 0.89433   |

Std Error uses a pooled estimate of error variance

**Means Comparisons**

**Comparisons with a control using Dunnnett's Method**

**Oneway Analysis of 5,6-Dihydroxyindole-2-carboxylic acid By Label**

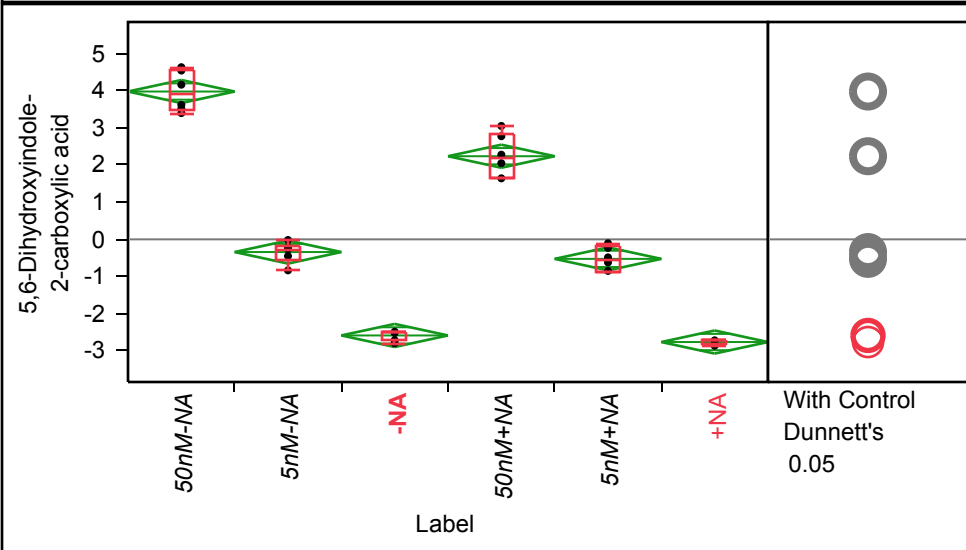

**Quantiles**

| Level   | Minimum  | 10%      | 25%      | Median   | 75%      | 90%      | Maximum  |
|---------|----------|----------|----------|----------|----------|----------|----------|
| 50nM-NA | 3.395595 | 3.395595 | 3.48174  | 3.887874 | 4.561671 | 4.628571 | 4.628571 |
| 5nM-NA  | -0.83323 | -0.83323 | -0.54497 | -0.2639  | -0.16862 | -0.01755 | -0.01755 |
| -NA     | -2.79268 | -2.79268 | -2.73209 | -2.51375 | -2.48571 | -2.48508 | -2.48508 |
| 50nM+NA | 1.627311 | 1.627311 | 1.637509 | 2.161737 | 2.841799 | 3.048587 | 3.048587 |
| 5nM+NA  | -0.85992 | -0.85992 | -0.85099 | -0.55242 | -0.19863 | -0.10629 | -0.10629 |
| +NA     | -2.85972 | -2.85972 | -2.83373 | -2.72464 | -2.71555 | -2.71518 | -2.71518 |

**Oneway Anova**

**Summary of Fit**

|                            |          |
|----------------------------|----------|
| Rsquare                    | 0.980859 |
| Adj Rsquare                | 0.977669 |
| Root Mean Square Error     | 0.37216  |
| Mean of Response           | 1.111e-9 |
| Observations (or Sum Wgts) | 36       |

**Analysis of Variance**

| Source   | DF | Sum of Squares | Mean Square | F Ratio  | Prob > F |
|----------|----|----------------|-------------|----------|----------|
| Label    | 5  | 212.92750      | 42.5855     | 307.4703 | <.0001 * |
| Error    | 30 | 4.15508        | 0.1385      |          |          |
| C. Total | 35 | 217.08258      |             |          |          |

**Means for Oneway Anova**

| Level   | Number | Mean    | Std Error | Lower 95% | Upper 95% |
|---------|--------|---------|-----------|-----------|-----------|
| 50nM-NA | 6      | 3.9750  | 0.15193   | 3.665     | 4.285     |
| 5nM-NA  | 6      | -0.3411 | 0.15193   | -0.651    | -0.031    |
| -NA     | 6      | -2.5838 | 0.15193   | -2.894    | -2.274    |
| 50nM+NA | 6      | 2.2355  | 0.15193   | 1.925     | 2.546     |
| 5nM+NA  | 6      | -0.5247 | 0.15193   | -0.835    | -0.214    |
| +NA     | 6      | -2.7608 | 0.15193   | -3.071    | -2.451    |

Std Error uses a pooled estimate of error variance

**Means Comparisons**

**Comparisons with a control using Dunnett's Method**



**Oneway Analysis of 7-methylguanosine By Label**

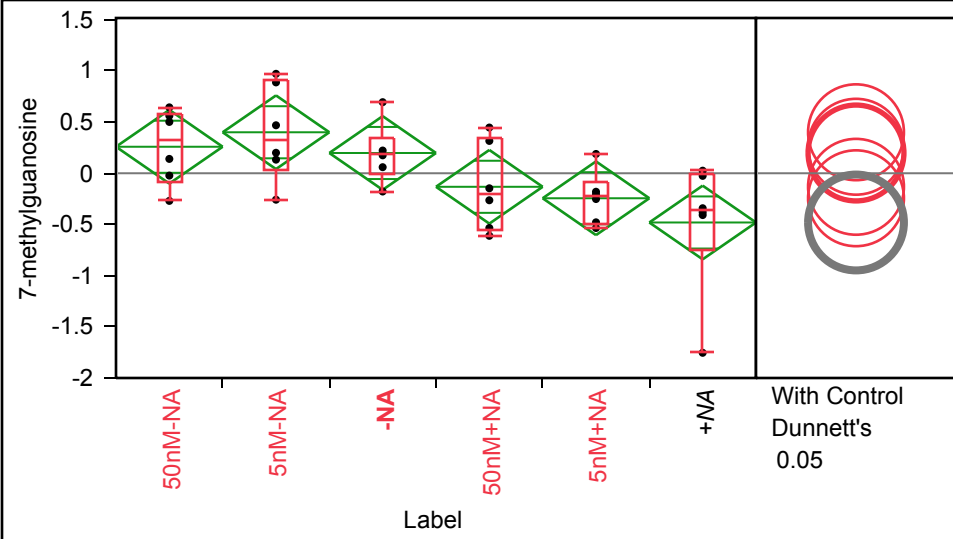

**Quantiles**

| Level   | Minimum  | 10%      | 25%      | Median   | 75%      | 90%      | Maximum  |
|---------|----------|----------|----------|----------|----------|----------|----------|
| 50nM-NA | -0.26986 | -0.26986 | -0.08464 | 0.320826 | 0.581712 | 0.643727 | 0.643727 |
| 5nM-NA  | -0.25818 | -0.25818 | 0.03516  | 0.334372 | 0.908546 | 0.971286 | 0.971286 |
| -NA     | -0.17823 | -0.17823 | -0.00013 | 0.195245 | 0.339979 | 0.694327 | 0.694327 |
| 50nM+NA | -0.61092 | -0.61092 | -0.55352 | -0.20533 | 0.348565 | 0.446549 | 0.446549 |
| 5nM+NA  | -0.5348  | -0.5348  | -0.49326 | -0.2294  | -0.08839 | 0.188426 | 0.188426 |
| +NA     | -1.75383 | -1.75383 | -0.74471 | -0.36127 | -0.01277 | 0.02509  | 0.02509  |

**Oneway Anova**

**Summary of Fit**

|                            |          |
|----------------------------|----------|
| Rsquare                    | 0.38166  |
| Adj Rsquare                | 0.278603 |
| Root Mean Square Error     | 0.431601 |
| Mean of Response           | -1.39e-9 |
| Observations (or Sum Wgts) | 36       |

**Analysis of Variance**

| Source   | DF | Sum of Squares | Mean Square | F Ratio | Prob > F |
|----------|----|----------------|-------------|---------|----------|
| Label    | 5  | 3.4493391      | 0.689868    | 3.7034  | 0.0099 * |
| Error    | 30 | 5.5883854      | 0.186280    |         |          |
| C. Total | 35 | 9.0377245      |             |         |          |

**Means for Oneway Anova**

| Level   | Number | Mean     | Std Error | Lower 95% | Upper 95% |
|---------|--------|----------|-----------|-----------|-----------|
| 50nM-NA | 6      | 0.25894  | 0.17620   | -0.1009   | 0.6188    |
| 5nM-NA  | 6      | 0.40040  | 0.17620   | 0.0406    | 0.7603    |
| -NA     | 6      | 0.19795  | 0.17620   | -0.1619   | 0.5578    |
| 50nM+NA | 6      | -0.13225 | 0.17620   | -0.4921   | 0.2276    |
| 5nM+NA  | 6      | -0.24421 | 0.17620   | -0.6041   | 0.1156    |
| +NA     | 6      | -0.48084 | 0.17620   | -0.8407   | -0.1210   |

Std Error uses a pooled estimate of error variance

**Means Comparisons**

**Comparisons with a control using Dunnett's Method**

**Oneway Analysis of acetoacetate By Label**

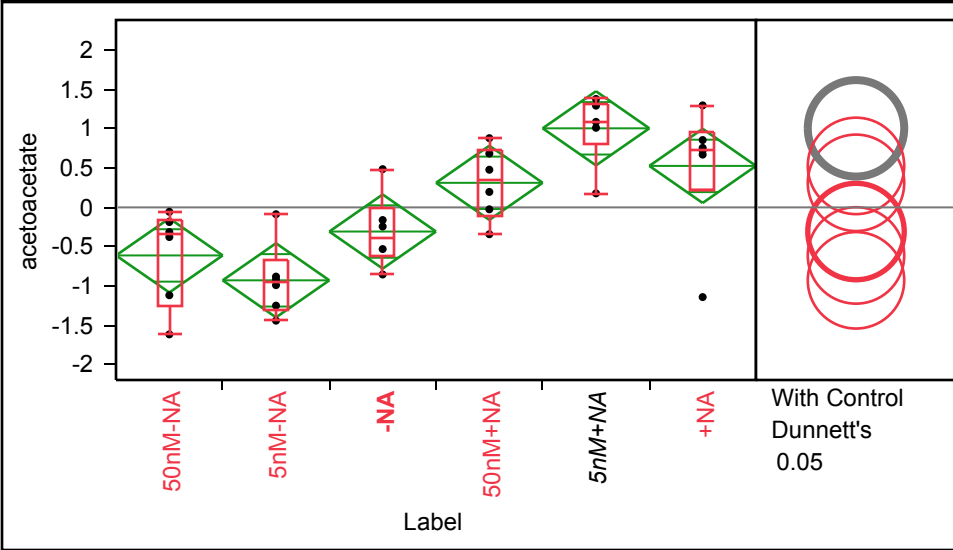

**Quantiles**

| Level   | Minimum  | 10%      | 25%      | Median   | 75%      | 90%      | Maximum  |
|---------|----------|----------|----------|----------|----------|----------|----------|
| 50nM-NA | -1.61459 | -1.61459 | -1.24132 | -0.34584 | -0.15361 | -0.05611 | -0.05611 |
| 5nM-NA  | -1.44024 | -1.44024 | -1.29709 | -0.95407 | -0.68163 | -0.08684 | -0.08684 |
| -NA     | -0.85319 | -0.85319 | -0.61939 | -0.3865  | 0.000867 | 0.486136 | 0.486136 |
| 50nM+NA | -0.341   | -0.341   | -0.1036  | 0.337675 | 0.733548 | 0.879972 | 0.879972 |
| 5nM+NA  | 0.178584 | 0.178584 | 0.80371  | 1.084422 | 1.315134 | 1.378987 | 1.378987 |
| +NA     | -1.14047 | -1.14047 | 0.21823  | 0.740803 | 0.966333 | 1.296944 | 1.296944 |

**Oneway Anova**

**Summary of Fit**

|                            |          |
|----------------------------|----------|
| Rsquare                    | 0.629475 |
| Adj Rsquare                | 0.567721 |
| Root Mean Square Error     | 0.565282 |
| Mean of Response           | -5.6e-10 |
| Observations (or Sum Wgts) | 36       |

**Analysis of Variance**

| Source   | DF | Sum of Squares | Mean Square | F Ratio | Prob > F |
|----------|----|----------------|-------------|---------|----------|
| Label    | 5  | 16.285981      | 3.25720     | 10.1933 | <.0001 * |
| Error    | 30 | 9.586323       | 0.31954     |         |          |
| C. Total | 35 | 25.872304      |             |         |          |

**Means for Oneway Anova**

| Level   | Number | Mean    | Std Error | Lower 95% | Upper 95% |
|---------|--------|---------|-----------|-----------|-----------|
| 50nM-NA | 6      | -0.6109 | 0.23078   | -1.082    | -0.140    |
| 5nM-NA  | 6      | -0.9274 | 0.23078   | -1.399    | -0.456    |
| -NA     | 6      | -0.3071 | 0.23078   | -0.778    | 0.164     |
| 50nM+NA | 6      | 0.3124  | 0.23078   | -0.159    | 0.784     |
| 5nM+NA  | 6      | 1.0054  | 0.23078   | 0.534     | 1.477     |
| +NA     | 6      | 0.5276  | 0.23078   | 0.056     | 0.999     |

Std Error uses a pooled estimate of error variance

**Means Comparisons**

**Comparisons with a control using Dunnnett's Method**

**Oneway Analysis of acetoacetyl-CoA By Label**

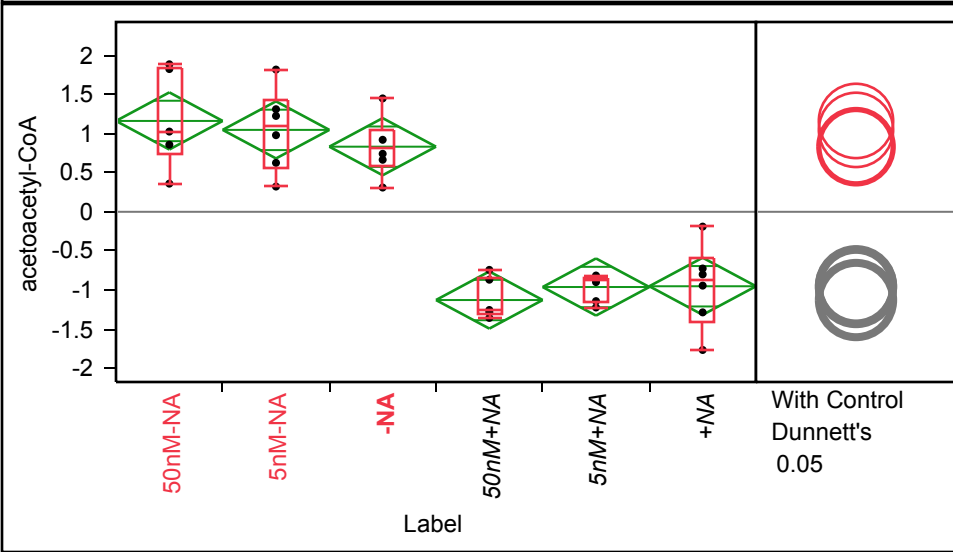

**Quantiles**

| Level   | Minimum  | 10%      | 25%      | Median   | 75%      | 90%      | Maximum  |
|---------|----------|----------|----------|----------|----------|----------|----------|
| 50nM-NA | 0.35964  | 0.35964  | 0.732198 | 1.018396 | 1.837026 | 1.88239  | 1.88239  |
| 5nM-NA  | 0.322191 | 0.322191 | 0.549042 | 1.100699 | 1.435656 | 1.814986 | 1.814986 |
| -NA     | 0.309725 | 0.309725 | 0.575431 | 0.823377 | 1.050834 | 1.44678  | 1.44678  |
| 50nM+NA | -1.3544  | -1.3544  | -1.30071 | -1.25529 | -0.83515 | -0.74126 | -0.74126 |
| 5nM+NA  | -1.22087 | -1.22087 | -1.16025 | -0.87206 | -0.83388 | -0.81338 | -0.81338 |
| +NA     | -1.76335 | -1.76335 | -1.40339 | -0.8707  | -0.59004 | -0.18922 | -0.18922 |

**Oneway Anova**

**Summary of Fit**

|                            |          |
|----------------------------|----------|
| Rsquare                    | 0.866783 |
| Adj Rsquare                | 0.844581 |
| Root Mean Square Error     | 0.437247 |
| Mean of Response           | 2.778e-9 |
| Observations (or Sum Wgts) | 36       |

**Analysis of Variance**

| Source   | DF | Sum of Squares | Mean Square | F Ratio | Prob > F |
|----------|----|----------------|-------------|---------|----------|
| Label    | 5  | 37.318752      | 7.46375     | 39.0394 | <.0001 * |
| Error    | 30 | 5.735551       | 0.19119     |         |          |
| C. Total | 35 | 43.054303      |             |         |          |

**Means for Oneway Anova**

| Level   | Number | Mean    | Std Error | Lower 95% | Upper 95% |
|---------|--------|---------|-----------|-----------|-----------|
| 50nM-NA | 6      | 1.1595  | 0.17851   | 0.795     | 1.524     |
| 5nM-NA  | 6      | 1.0454  | 0.17851   | 0.681     | 1.410     |
| -NA     | 6      | 0.8310  | 0.17851   | 0.466     | 1.196     |
| 50nM+NA | 6      | -1.1259 | 0.17851   | -1.490    | -0.761    |
| 5nM+NA  | 6      | -0.9599 | 0.17851   | -1.324    | -0.595    |
| +NA     | 6      | -0.9502 | 0.17851   | -1.315    | -0.586    |

Std Error uses a pooled estimate of error variance

**Means Comparisons**

**Comparisons with a control using Dunnett's Method**

**Oneway Analysis of Acetylcarnitine By Label**

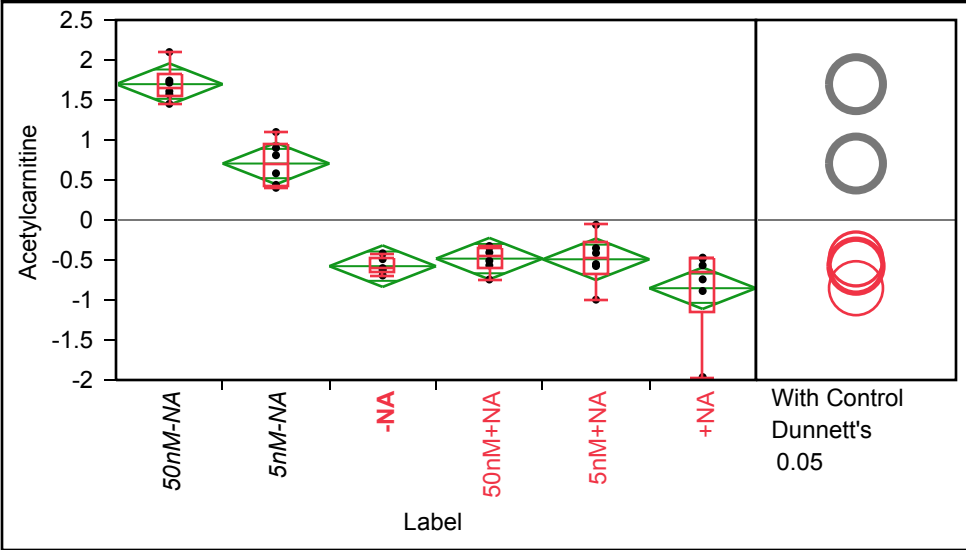

**Quantiles**

| Level   | Minimum  | 10%      | 25%      | Median   | 75%      | 90%      | Maximum  |
|---------|----------|----------|----------|----------|----------|----------|----------|
| 50nM-NA | 1.451836 | 1.451836 | 1.541049 | 1.661973 | 1.831609 | 2.098868 | 2.098868 |
| 5nM-NA  | 0.402519 | 0.402519 | 0.429722 | 0.696512 | 0.950654 | 1.099695 | 1.099695 |
| -NA     | -0.69392 | -0.69392 | -0.65587 | -0.61013 | -0.4713  | -0.41639 | -0.41639 |
| 50nM+NA | -0.74395 | -0.74395 | -0.61214 | -0.45785 | -0.33919 | -0.32534 | -0.32534 |
| 5nM+NA  | -0.99577 | -0.99577 | -0.68026 | -0.48224 | -0.2788  | -0.05997 | -0.05997 |
| +NA     | -1.96373 | -1.96373 | -1.15653 | -0.65472 | -0.48091 | -0.47053 | -0.47053 |

**Oneway Anova**

**Summary of Fit**

|                            |          |
|----------------------------|----------|
| Rsquare                    | 0.910552 |
| Adj Rsquare                | 0.895644 |
| Root Mean Square Error     | 0.310776 |
| Mean of Response           | 2.78e-10 |
| Observations (or Sum Wgts) | 36       |

**Analysis of Variance**

| Source   | DF | Sum of Squares | Mean Square | F Ratio | Prob > F |
|----------|----|----------------|-------------|---------|----------|
| Label    | 5  | 29.495197      | 5.89904     | 61.0782 | <.0001 * |
| Error    | 30 | 2.897453       | 0.09658     |         |          |
| C. Total | 35 | 32.392650      |             |         |          |

**Means for Oneway Anova**

| Level   | Number | Mean    | Std Error | Lower 95% | Upper 95% |
|---------|--------|---------|-----------|-----------|-----------|
| 50nM-NA | 6      | 1.6980  | 0.12687   | 1.439     | 1.957     |
| 5nM-NA  | 6      | 0.7058  | 0.12687   | 0.447     | 0.965     |
| -NA     | 6      | -0.5772 | 0.12687   | -0.836    | -0.318    |
| 50nM+NA | 6      | -0.4828 | 0.12687   | -0.742    | -0.224    |
| 5nM+NA  | 6      | -0.4912 | 0.12687   | -0.750    | -0.232    |
| +NA     | 6      | -0.8526 | 0.12687   | -1.112    | -0.593    |

Std Error uses a pooled estimate of error variance

**Means Comparisons**

**Comparisons with a control using Dunnnett's Method**

**Oneway Analysis of Acetylcholine By Label**

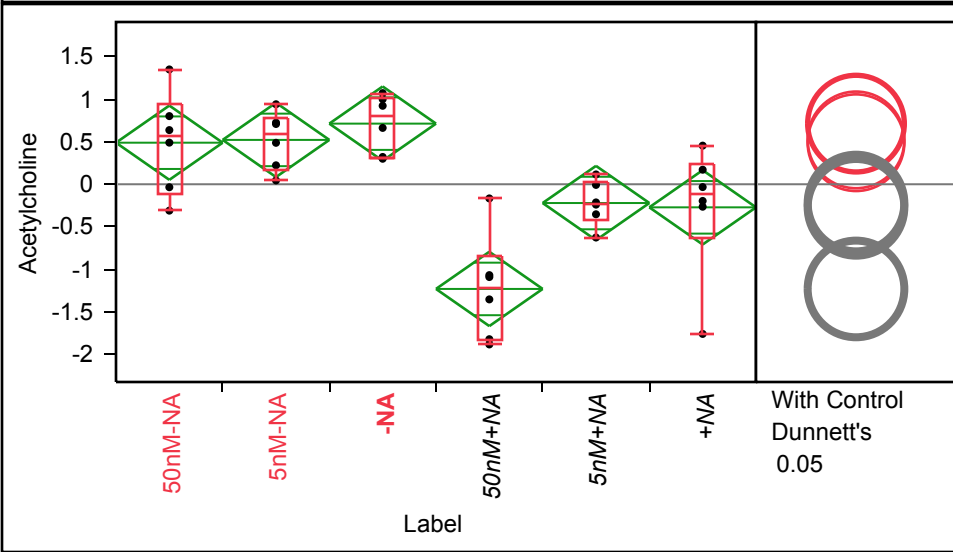

**Quantiles**

| Level   | Minimum  | 10%      | 25%      | Median   | 75%      | 90%      | Maximum  |
|---------|----------|----------|----------|----------|----------|----------|----------|
| 50nM-NA | -0.3102  | -0.3102  | -0.10393 | 0.563196 | 0.938756 | 1.350294 | 1.350294 |
| 5nM-NA  | 0.04521  | 0.04521  | 0.178399 | 0.598152 | 0.778601 | 0.940769 | 0.940769 |
| -NA     | 0.299941 | 0.299941 | 0.31562  | 0.792813 | 1.01811  | 1.071842 | 1.071842 |
| 50nM+NA | -1.88394 | -1.88394 | -1.83779 | -1.22277 | -0.84325 | -0.16672 | -0.16672 |
| 5nM+NA  | -0.62621 | -0.62621 | -0.4214  | -0.2266  | 0.023143 | 0.115384 | 0.115384 |
| +NA     | -1.76028 | -1.76028 | -0.63825 | -0.11466 | 0.241761 | 0.454025 | 0.454025 |

**Oneway Anova**

**Summary of Fit**

|                            |          |
|----------------------------|----------|
| Rsquare                    | 0.659372 |
| Adj Rsquare                | 0.602601 |
| Root Mean Square Error     | 0.524029 |
| Mean of Response           | 5.56e-11 |
| Observations (or Sum Wgts) | 36       |

**Analysis of Variance**

| Source   | DF | Sum of Squares | Mean Square | F Ratio | Prob > F |
|----------|----|----------------|-------------|---------|----------|
| Label    | 5  | 15.947136      | 3.18943     | 11.6145 | <.0001 * |
| Error    | 30 | 8.238193       | 0.27461     |         |          |
| C. Total | 35 | 24.185329      |             |         |          |

**Means for Oneway Anova**

| Level   | Number | Mean    | Std Error | Lower 95% | Upper 95% |
|---------|--------|---------|-----------|-----------|-----------|
| 50nM-NA | 6      | 0.4888  | 0.21393   | 0.052     | 0.926     |
| 5nM-NA  | 6      | 0.5216  | 0.21393   | 0.085     | 0.959     |
| -NA     | 6      | 0.7131  | 0.21393   | 0.276     | 1.150     |
| 50nM+NA | 6      | -1.2312 | 0.21393   | -1.668    | -0.794    |
| 5nM+NA  | 6      | -0.2208 | 0.21393   | -0.658    | 0.216     |
| +NA     | 6      | -0.2715 | 0.21393   | -0.708    | 0.165     |

Std Error uses a pooled estimate of error variance

**Means Comparisons**

**Comparisons with a control using Dunnett's Method**

**Oneway Analysis of acetyl-CoA By Label**

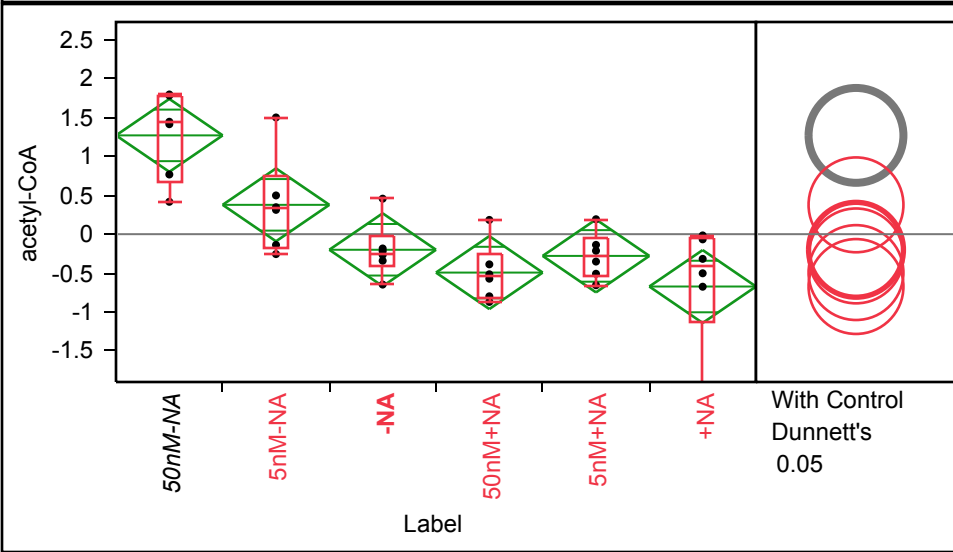

**Quantiles**

| Level   | Minimum  | 10%      | 25%      | Median   | 75%      | 90%      | Maximum  |
|---------|----------|----------|----------|----------|----------|----------|----------|
| 50nM-NA | 0.416728 | 0.416728 | 0.68027  | 1.430849 | 1.787412 | 1.797572 | 1.797572 |
| 5nM-NA  | -0.25641 | -0.25641 | -0.1682  | 0.329681 | 0.749143 | 1.50188  | 1.50188  |
| -NA     | -0.64873 | -0.64873 | -0.41886 | -0.24303 | -0.02405 | 0.456726 | 0.456726 |
| 50nM+NA | -0.87179 | -0.87179 | -0.81791 | -0.54466 | -0.24554 | 0.183348 | 0.183348 |
| 5nM+NA  | -0.65709 | -0.65709 | -0.54653 | -0.28323 | -0.0554  | 0.191924 | 0.191924 |
| +NA     | -2.46177 | -2.46177 | -1.12272 | -0.41068 | -0.05408 | -0.01626 | -0.01626 |

**Oneway Anova**

**Summary of Fit**

|                            |          |
|----------------------------|----------|
| Rsquare                    | 0.619329 |
| Adj Rsquare                | 0.555884 |
| Root Mean Square Error     | 0.562702 |
| Mean of Response           | -5.6e-10 |
| Observations (or Sum Wgts) | 36       |

**Analysis of Variance**

| Source   | DF | Sum of Squares | Mean Square | F Ratio | Prob > F |
|----------|----|----------------|-------------|---------|----------|
| Label    | 5  | 15.454311      | 3.09086     | 9.7616  | <.0001 * |
| Error    | 30 | 9.499003       | 0.31663     |         |          |
| C. Total | 35 | 24.953313      |             |         |          |

**Means for Oneway Anova**

| Level   | Number | Mean    | Std Error | Lower 95% | Upper 95% |
|---------|--------|---------|-----------|-----------|-----------|
| 50nM-NA | 6      | 1.2714  | 0.22972   | 0.802     | 1.741     |
| 5nM-NA  | 6      | 0.3774  | 0.22972   | -0.092    | 0.847     |
| -NA     | 6      | -0.2008 | 0.22972   | -0.670    | 0.268     |
| 50nM+NA | 6      | -0.4944 | 0.22972   | -0.964    | -0.025    |
| 5nM+NA  | 6      | -0.2799 | 0.22972   | -0.749    | 0.189     |
| +NA     | 6      | -0.6737 | 0.22972   | -1.143    | -0.205    |

Std Error uses a pooled estimate of error variance

**Means Comparisons**

**Comparisons with a control using Dunnnett's Method**

**Oneway Analysis of Acetyllysine By Label**

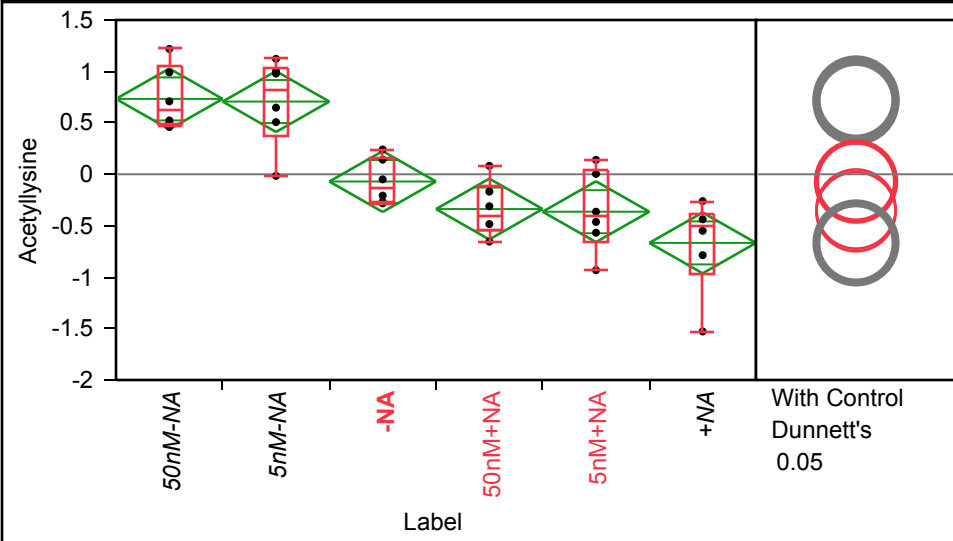

**Quantiles**

| Level   | Minimum  | 10%      | 25%      | Median   | 75%      | 90%      | Maximum  |
|---------|----------|----------|----------|----------|----------|----------|----------|
| 50nM-NA | 0.459884 | 0.459884 | 0.485708 | 0.616287 | 1.04758  | 1.218643 | 1.218643 |
| 5nM-NA  | -0.01554 | -0.01554 | 0.37663  | 0.813423 | 1.031317 | 1.122135 | 1.122135 |
| -NA     | -0.28222 | -0.28222 | -0.27009 | -0.12851 | 0.166814 | 0.240832 | 0.240832 |
| 50nM+NA | -0.65414 | -0.65414 | -0.5331  | -0.39739 | -0.1059  | 0.081717 | 0.081717 |
| 5nM+NA  | -0.93204 | -0.93204 | -0.65901 | -0.41368 | 0.03788  | 0.140133 | 0.140133 |
| +NA     | -1.52811 | -1.52811 | -0.97165 | -0.49536 | -0.39356 | -0.26082 | -0.26082 |

**Oneway Anova**

**Summary of Fit**

|                            |          |
|----------------------------|----------|
| Rsquare                    | 0.733793 |
| Adj Rsquare                | 0.689426 |
| Root Mean Square Error     | 0.354653 |
| Mean of Response           | -5.6e-11 |
| Observations (or Sum Wgts) | 36       |

**Analysis of Variance**

| Source   | DF | Sum of Squares | Mean Square | F Ratio | Prob > F |
|----------|----|----------------|-------------|---------|----------|
| Label    | 5  | 10.401181      | 2.08024     | 16.5389 | <.0001 * |
| Error    | 30 | 3.773357       | 0.12578     |         |          |
| C. Total | 35 | 14.174538      |             |         |          |

**Means for Oneway Anova**

| Level   | Number | Mean     | Std Error | Lower 95% | Upper 95% |
|---------|--------|----------|-----------|-----------|-----------|
| 50nM-NA | 6      | 0.73266  | 0.14479   | 0.4370    | 1.028     |
| 5nM-NA  | 6      | 0.70697  | 0.14479   | 0.4113    | 1.003     |
| -NA     | 6      | -0.07039 | 0.14479   | -0.3661   | 0.225     |
| 50nM+NA | 6      | -0.33807 | 0.14479   | -0.6338   | -0.042    |
| 5nM+NA  | 6      | -0.36391 | 0.14479   | -0.6596   | -0.068    |
| +NA     | 6      | -0.66727 | 0.14479   | -0.9630   | -0.372    |

Std Error uses a pooled estimate of error variance

**Means Comparisons**

**Comparisons with a control using Dunnett's Method**

**Oneway Analysis of acetylphosphate By Label**

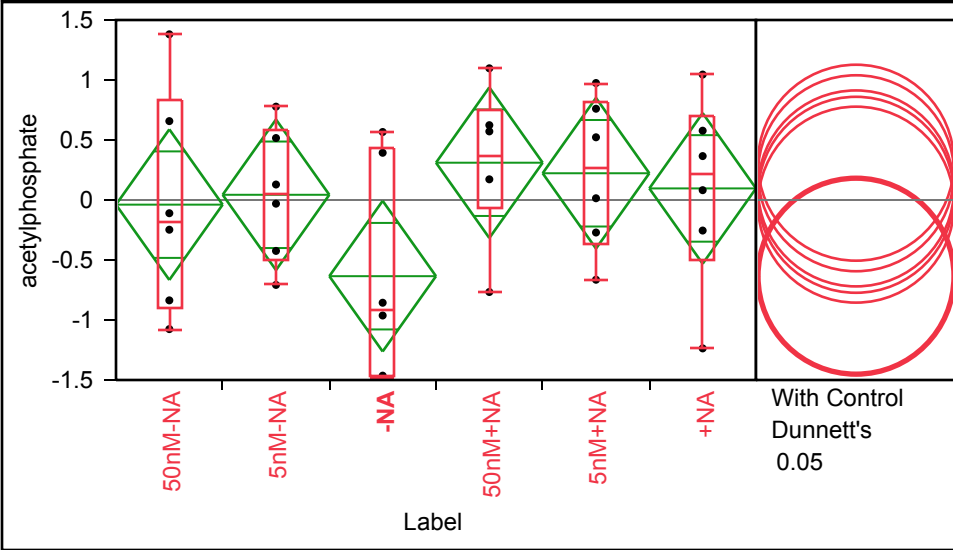

**Quantiles**

| Level   | Minimum  | 10%      | 25%      | Median   | 75%      | 90%      | Maximum  |
|---------|----------|----------|----------|----------|----------|----------|----------|
| 50nM-NA | -1.07595 | -1.07595 | -0.89634 | -0.17899 | 0.838193 | 1.3807   | 1.3807   |
| 5nM-NA  | -0.70761 | -0.70761 | -0.49512 | 0.049212 | 0.581712 | 0.777793 | 0.777793 |
| -NA     | -1.48693 | -1.48693 | -1.46957 | -0.90934 | 0.436784 | 0.566676 | 0.566676 |
| 50nM+NA | -0.76671 | -0.76671 | -0.06682 | 0.371977 | 0.74202  | 1.097306 | 1.097306 |
| 5nM+NA  | -0.66442 | -0.66442 | -0.36936 | 0.268538 | 0.814107 | 0.974837 | 0.974837 |
| +NA     | -1.23658 | -1.23658 | -0.50008 | 0.223894 | 0.69441  | 1.045154 | 1.045154 |

**Oneway Anova**

**Summary of Fit**

|                            |          |
|----------------------------|----------|
| Rsquare                    | 0.165534 |
| Adj Rsquare                | 0.026457 |
| Root Mean Square Error     | 0.75274  |
| Mean of Response           | 2.78e-10 |
| Observations (or Sum Wgts) | 36       |

**Analysis of Variance**

| Source   | DF | Sum of Squares | Mean Square | F Ratio | Prob > F |
|----------|----|----------------|-------------|---------|----------|
| Label    | 5  | 3.372034       | 0.674407    | 1.1902  | 0.3374   |
| Error    | 30 | 16.998548      | 0.566618    |         |          |
| C. Total | 35 | 20.370582      |             |         |          |

**Means for Oneway Anova**

| Level   | Number | Mean     | Std Error | Lower 95% | Upper 95% |
|---------|--------|----------|-----------|-----------|-----------|
| 50nM-NA | 6      | -0.03872 | 0.30731   | -0.666    | 0.5889    |
| 5nM-NA  | 6      | 0.04344  | 0.30731   | -0.584    | 0.6710    |
| -NA     | 6      | -0.63487 | 0.30731   | -1.262    | -0.0073   |
| 50nM+NA | 6      | 0.31077  | 0.30731   | -0.317    | 0.9384    |
| 5nM+NA  | 6      | 0.22283  | 0.30731   | -0.405    | 0.8504    |
| +NA     | 6      | 0.09655  | 0.30731   | -0.531    | 0.7241    |

Std Error uses a pooled estimate of error variance

**Means Comparisons**

**Comparisons with a control using Dunnett's Method**



**Oneway Analysis of adenine By Label**

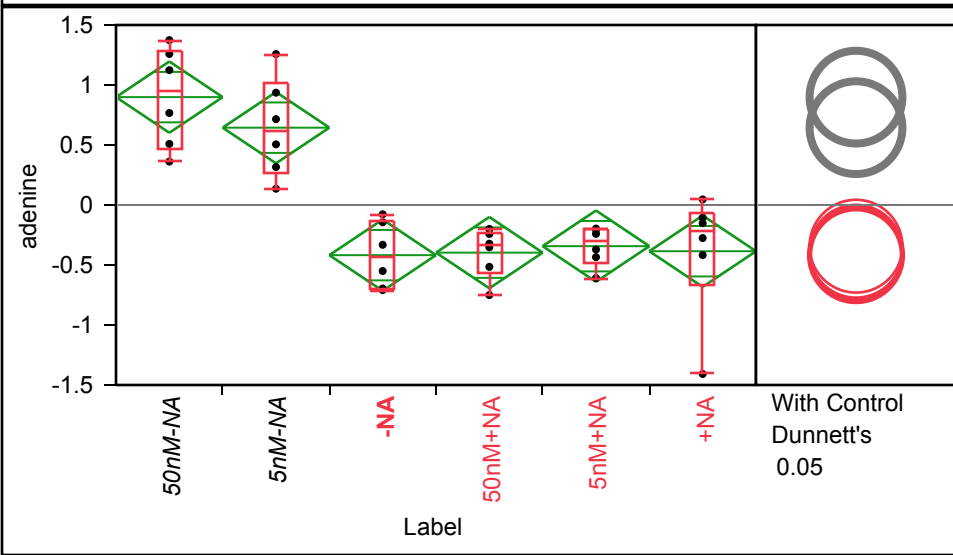

**Quantiles**

| Level   | Minimum  | 10%      | 25%      | Median   | 75%      | 90%      | Maximum  |
|---------|----------|----------|----------|----------|----------|----------|----------|
| 50nM-NA | 0.361597 | 0.361597 | 0.472346 | 0.945151 | 1.287433 | 1.373934 | 1.373934 |
| 5nM-NA  | 0.13564  | 0.13564  | 0.271053 | 0.610561 | 1.016356 | 1.257448 | 1.257448 |
| -NA     | -0.70905 | -0.70905 | -0.6991  | -0.4409  | -0.12729 | -0.07734 | -0.07734 |
| 50nM+NA | -0.75067 | -0.75067 | -0.57429 | -0.33745 | -0.23082 | -0.19972 | -0.19972 |
| 5nM+NA  | -0.60902 | -0.60902 | -0.47817 | -0.3058  | -0.20455 | -0.19637 | -0.19637 |
| +NA     | -1.40795 | -1.40795 | -0.66484 | -0.21364 | -0.06746 | 0.046383 | 0.046383 |

**Oneway Anova**

**Summary of Fit**

|                            |          |
|----------------------------|----------|
| Rsquare                    | 0.741453 |
| Adj Rsquare                | 0.698361 |
| Root Mean Square Error     | 0.356448 |
| Mean of Response           | -8.3e-10 |
| Observations (or Sum Wgts) | 36       |

**Analysis of Variance**

| Source   | DF | Sum of Squares | Mean Square | F Ratio | Prob > F |
|----------|----|----------------|-------------|---------|----------|
| Label    | 5  | 10.930925      | 2.18619     | 17.2066 | <.0001 * |
| Error    | 30 | 3.811655       | 0.12706     |         |          |
| C. Total | 35 | 14.742581      |             |         |          |

**Means for Oneway Anova**

| Level   | Number | Mean     | Std Error | Lower 95% | Upper 95% |
|---------|--------|----------|-----------|-----------|-----------|
| 50nM-NA | 6      | 0.89895  | 0.14552   | 0.6018    | 1.196     |
| 5nM-NA  | 6      | 0.64440  | 0.14552   | 0.3472    | 0.942     |
| -NA     | 6      | -0.41798 | 0.14552   | -0.7152   | -0.121    |
| 50nM+NA | 6      | -0.39699 | 0.14552   | -0.6942   | -0.100    |
| 5nM+NA  | 6      | -0.34314 | 0.14552   | -0.6403   | -0.046    |
| +NA     | 6      | -0.38523 | 0.14552   | -0.6824   | -0.088    |

Std Error uses a pooled estimate of error variance

**Means Comparisons**

**Comparisons with a control using Dunnnett's Method**

**Oneway Analysis of adenosine By Label**

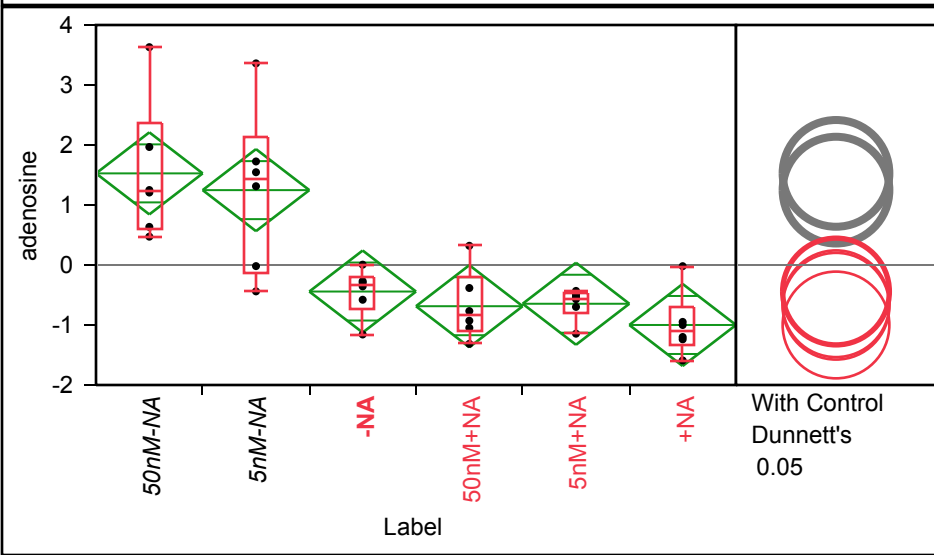

**Quantiles**

| Level   | Minimum  | 10%      | 25%      | Median   | 75%      | 90%      | Maximum  |
|---------|----------|----------|----------|----------|----------|----------|----------|
| 50nM-NA | 0.472367 | 0.472367 | 0.594415 | 1.228634 | 2.382603 | 3.630351 | 3.630351 |
| 5nM-NA  | -0.43933 | -0.43933 | -0.1238  | 1.42948  | 2.134335 | 3.360068 | 3.360068 |
| -NA     | -1.15801 | -1.15801 | -0.72393 | -0.32635 | -0.20023 | 0.005269 | 0.005269 |
| 50nM+NA | -1.31414 | -1.31414 | -1.11399 | -0.84826 | -0.20751 | 0.319997 | 0.319997 |
| 5nM+NA  | -1.14456 | -1.14456 | -0.80986 | -0.55236 | -0.48007 | -0.43202 | -0.43202 |
| +NA     | -1.59074 | -1.59074 | -1.32689 | -1.1001  | -0.71635 | -0.01982 | -0.01982 |

**Oneway Anova**

**Summary of Fit**

|                            |          |
|----------------------------|----------|
| Rsquare                    | 0.639869 |
| Adj Rsquare                | 0.579847 |
| Root Mean Square Error     | 0.819943 |
| Mean of Response           | -8.3e-11 |
| Observations (or Sum Wgts) | 36       |

**Analysis of Variance**

| Source   | DF | Sum of Squares | Mean Square | F Ratio | Prob > F |
|----------|----|----------------|-------------|---------|----------|
| Label    | 5  | 35.835981      | 7.16720     | 10.6606 | <.0001 * |
| Error    | 30 | 20.169204      | 0.67231     |         |          |
| C. Total | 35 | 56.005184      |             |         |          |

**Means for Oneway Anova**

| Level   | Number | Mean    | Std Error | Lower 95% | Upper 95% |
|---------|--------|---------|-----------|-----------|-----------|
| 50nM-NA | 6      | 1.5270  | 0.33474   | 0.843     | 2.211     |
| 5nM-NA  | 6      | 1.2478  | 0.33474   | 0.564     | 1.931     |
| -NA     | 6      | -0.4422 | 0.33474   | -1.126    | 0.241     |
| 50nM+NA | 6      | -0.6869 | 0.33474   | -1.371    | -0.0033   |
| 5nM+NA  | 6      | -0.6459 | 0.33474   | -1.330    | 0.038     |
| +NA     | 6      | -0.9997 | 0.33474   | -1.683    | -0.316    |

Std Error uses a pooled estimate of error variance

**Means Comparisons**

**Comparisons with a control using Dunnett's Method**

**Oneway Analysis of Adipic acid By Label**

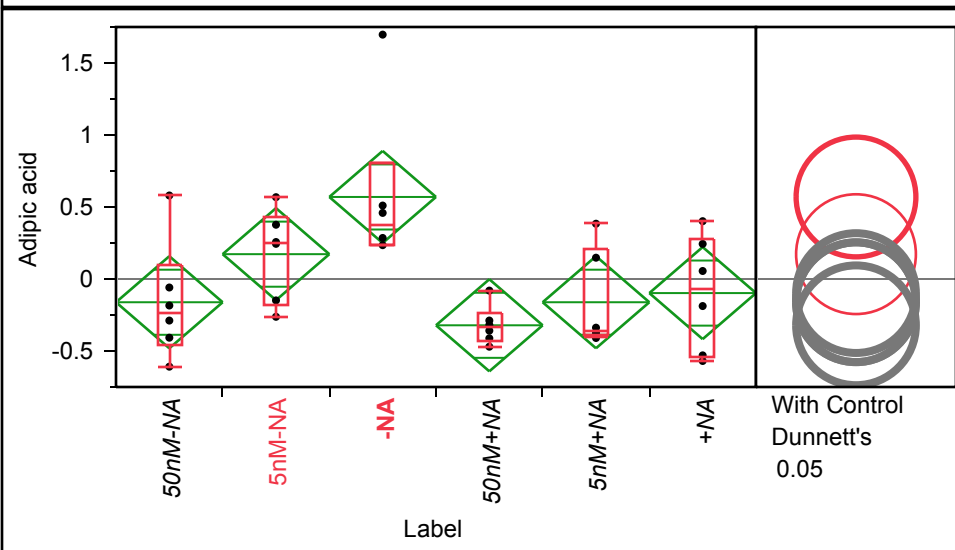

**Quantiles**

| Level   | Minimum  | 10%      | 25%      | Median   | 75%      | 90%      | Maximum  |
|---------|----------|----------|----------|----------|----------|----------|----------|
| 50nM-NA | -0.60882 | -0.60882 | -0.45793 | -0.23641 | 0.100638 | 0.579838 | 0.579838 |
| 5nM-NA  | -0.26246 | -0.26246 | -0.17719 | 0.250464 | 0.424652 | 0.568165 | 0.568165 |
| -NA     | 0.232196 | 0.232196 | 0.234266 | 0.371969 | 0.806697 | 1.696972 | 1.696972 |
| 50nM+NA | -0.47017 | -0.47017 | -0.4264  | -0.33894 | -0.23656 | -0.08065 | -0.08065 |
| 5nM+NA  | -0.40964 | -0.40964 | -0.38656 | -0.35579 | 0.206856 | 0.383829 | 0.383829 |
| +NA     | -0.56928 | -0.56928 | -0.54011 | -0.0661  | 0.283139 | 0.401461 | 0.401461 |

**Oneway Anova**

**Summary of Fit**

|                            |          |
|----------------------------|----------|
| Rsquare                    | 0.414028 |
| Adj Rsquare                | 0.316366 |
| Root Mean Square Error     | 0.383394 |
| Mean of Response           | -1.39e-9 |
| Observations (or Sum Wgts) | 36       |

**Analysis of Variance**

| Source   | DF | Sum of Squares | Mean Square | F Ratio | Prob > F |
|----------|----|----------------|-------------|---------|----------|
| Label    | 5  | 3.1157594      | 0.623152    | 4.2394  | 0.0049 * |
| Error    | 30 | 4.4097181      | 0.146991    |         |          |
| C. Total | 35 | 7.5254776      |             |         |          |

**Means for Oneway Anova**

| Level   | Number | Mean     | Std Error | Lower 95% | Upper 95% |
|---------|--------|----------|-----------|-----------|-----------|
| 50nM-NA | 6      | -0.16142 | 0.15652   | -0.4811   | 0.1582    |
| 5nM-NA  | 6      | 0.17245  | 0.15652   | -0.1472   | 0.4921    |
| -NA     | 6      | 0.56967  | 0.15652   | 0.2500    | 0.8893    |
| 50nM+NA | 6      | -0.32151 | 0.15652   | -0.6412   | -0.0018   |
| 5nM+NA  | 6      | -0.16140 | 0.15652   | -0.4811   | 0.1583    |
| +NA     | 6      | -0.09779 | 0.15652   | -0.4174   | 0.2219    |

Std Error uses a pooled estimate of error variance

**Means Comparisons**

**Comparisons with a control using Dunnnett's Method**

**Oneway Analysis of ADP By Label**

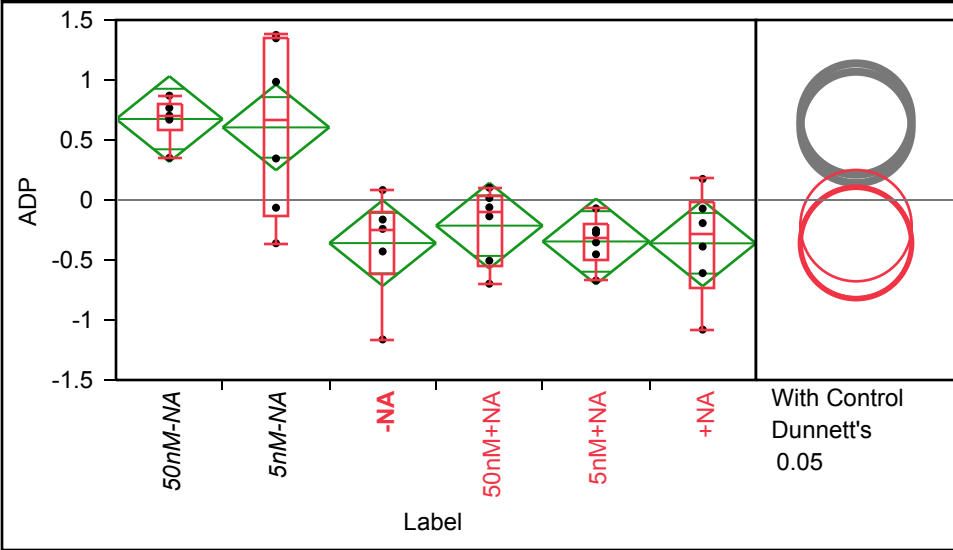

**Quantiles**

| Level   | Minimum  | 10%      | 25%      | Median   | 75%      | 90%      | Maximum  |
|---------|----------|----------|----------|----------|----------|----------|----------|
| 50nM-NA | 0.351318 | 0.351318 | 0.590116 | 0.695331 | 0.792507 | 0.869728 | 0.869728 |
| 5nM-NA  | -0.36045 | -0.36045 | -0.13828 | 0.665316 | 1.354778 | 1.375931 | 1.375931 |
| -NA     | -1.16213 | -1.16213 | -0.61218 | -0.24205 | -0.10165 | 0.082558 | 0.082558 |
| 50nM+NA | -0.69768 | -0.69768 | -0.55409 | -0.09838 | 0.037821 | 0.102164 | 0.102164 |
| 5nM+NA  | -0.67084 | -0.67084 | -0.50734 | -0.31416 | -0.206   | -0.07013 | -0.07013 |
| +NA     | -1.08028 | -1.08028 | -0.72714 | -0.29038 | -0.00981 | 0.17534  | 0.17534  |

**Oneway Anova**

**Summary of Fit**

|                            |          |
|----------------------------|----------|
| Rsquare                    | 0.576585 |
| Adj Rsquare                | 0.506016 |
| Root Mean Square Error     | 0.427736 |
| Mean of Response           | 2.78e-10 |
| Observations (or Sum Wgts) | 36       |

**Analysis of Variance**

| Source   | DF | Sum of Squares | Mean Square | F Ratio | Prob > F |
|----------|----|----------------|-------------|---------|----------|
| Label    | 5  | 7.474313       | 1.49486     | 8.1705  | <.0001 * |
| Error    | 30 | 5.488750       | 0.18296     |         |          |
| C. Total | 35 | 12.963063      |             |         |          |

**Means for Oneway Anova**

| Level   | Number | Mean     | Std Error | Lower 95% | Upper 95% |
|---------|--------|----------|-----------|-----------|-----------|
| 50nM-NA | 6      | 0.67470  | 0.17462   | 0.3181    | 1.031     |
| 5nM-NA  | 6      | 0.60494  | 0.17462   | 0.2483    | 0.962     |
| -NA     | 6      | -0.35927 | 0.17462   | -0.7159   | -0.0026   |
| 50nM+NA | 6      | -0.21369 | 0.17462   | -0.5703   | 0.143     |
| 5nM+NA  | 6      | -0.34557 | 0.17462   | -0.7022   | 0.011     |
| +NA     | 6      | -0.36111 | 0.17462   | -0.7177   | -0.0045   |

Std Error uses a pooled estimate of error variance

**Means Comparisons**

**Comparisons with a control using Dunnnett's Method**

**Oneway Analysis of AICAR 3,5-Cyclic Phosphate By Label**

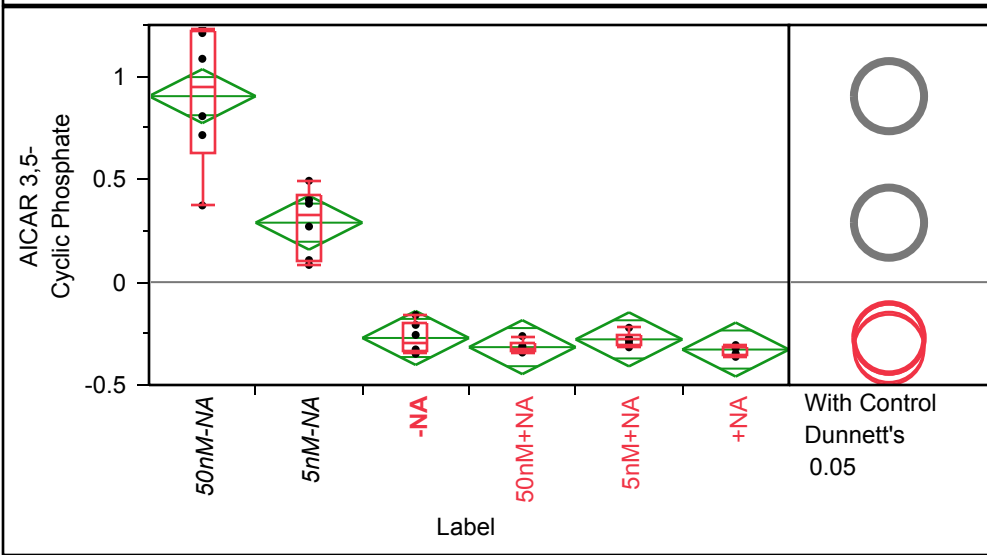

**Quantiles**

| Level   | Minimum  | 10%      | 25%      | Median   | 75%      | 90%      | Maximum  |
|---------|----------|----------|----------|----------|----------|----------|----------|
| 50nM-NA | 0.372871 | 0.372871 | 0.629357 | 0.946287 | 1.216381 | 1.233304 | 1.233304 |
| 5nM-NA  | 0.08376  | 0.08376  | 0.10124  | 0.325903 | 0.422721 | 0.492581 | 0.492581 |
| -NA     | -0.34808 | -0.34808 | -0.33365 | -0.29192 | -0.19575 | -0.15992 | -0.15992 |
| 50nM+NA | -0.34221 | -0.34221 | -0.33433 | -0.3249  | -0.29786 | -0.26224 | -0.26224 |
| 5nM+NA  | -0.31667 | -0.31667 | -0.30336 | -0.28029 | -0.25868 | -0.22186 | -0.22186 |
| +NA     | -0.36307 | -0.36307 | -0.35103 | -0.3185  | -0.31115 | -0.30599 | -0.30599 |

**Oneway Anova**

**Summary of Fit**

|                            |          |
|----------------------------|----------|
| Rsquare                    | 0.910641 |
| Adj Rsquare                | 0.895748 |
| Root Mean Square Error     | 0.157197 |
| Mean of Response           | -1.2e-17 |
| Observations (or Sum Wgts) | 36       |

**Analysis of Variance**

| Source   | DF | Sum of Squares | Mean Square | F Ratio | Prob > F |
|----------|----|----------------|-------------|---------|----------|
| Label    | 5  | 7.5546943      | 1.51094     | 61.1449 | <.0001 * |
| Error    | 30 | 0.7413240      | 0.02471     |         |          |
| C. Total | 35 | 8.2960183      |             |         |          |

**Means for Oneway Anova**

| Level   | Number | Mean     | Std Error | Lower 95% | Upper 95% |
|---------|--------|----------|-----------|-----------|-----------|
| 50nM-NA | 6      | 0.90406  | 0.06418   | 0.7730    | 1.035     |
| 5nM-NA  | 6      | 0.28911  | 0.06418   | 0.1580    | 0.420     |
| -NA     | 6      | -0.27139 | 0.06418   | -0.4025   | -0.140    |
| 50nM+NA | 6      | -0.31595 | 0.06418   | -0.4470   | -0.185    |
| 5nM+NA  | 6      | -0.27816 | 0.06418   | -0.4092   | -0.147    |
| +NA     | 6      | -0.32766 | 0.06418   | -0.4587   | -0.197    |

Std Error uses a pooled estimate of error variance

**Means Comparisons**

**Comparisons with a control using Dunnett's Method**

**Oneway Analysis of AICAR(ZMP) By Label**

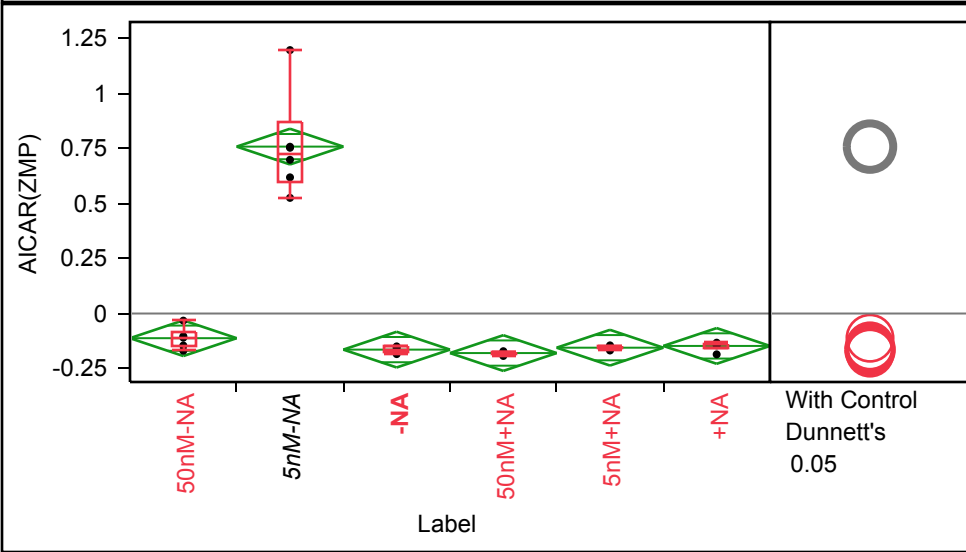

**Quantiles**

| Level   | Minimum  | 10%      | 25%      | Median   | 75%      | 90%      | Maximum  |
|---------|----------|----------|----------|----------|----------|----------|----------|
| 50nM-NA | -0.16912 | -0.16912 | -0.15141 | -0.11121 | -0.08547 | -0.03245 | -0.03245 |
| 5nM-NA  | 0.525644 | 0.525644 | 0.595543 | 0.726007 | 0.867752 | 1.197175 | 1.197175 |
| -NA     | -0.18442 | -0.18442 | -0.17424 | -0.16355 | -0.15189 | -0.14955 | -0.14955 |
| 50nM+NA | -0.1929  | -0.1929  | -0.18471 | -0.17884 | -0.17357 | -0.17139 | -0.17139 |
| 5nM+NA  | -0.16798 | -0.16798 | -0.15961 | -0.15579 | -0.14928 | -0.14488 | -0.14488 |
| +NA     | -0.18574 | -0.18574 | -0.15489 | -0.14091 | -0.1377  | -0.13261 | -0.13261 |

**Oneway Anova**

**Summary of Fit**

|                            |          |
|----------------------------|----------|
| Rsquare                    | 0.936097 |
| Adj Rsquare                | 0.925446 |
| Root Mean Square Error     | 0.097279 |
| Mean of Response           | -2.8e-10 |
| Observations (or Sum Wgts) | 36       |

**Analysis of Variance**

| Source   | DF | Sum of Squares | Mean Square | F Ratio | Prob > F |
|----------|----|----------------|-------------|---------|----------|
| Label    | 5  | 4.1586762      | 0.831735    | 87.8921 | <.0001 * |
| Error    | 30 | 0.2838944      | 0.009463    |         |          |
| C. Total | 35 | 4.4425705      |             |         |          |

**Means for Oneway Anova**

| Level   | Number | Mean     | Std Error | Lower 95% | Upper 95% |
|---------|--------|----------|-----------|-----------|-----------|
| 50nM-NA | 6      | -0.11211 | 0.03971   | -0.1932   | -0.0310   |
| 5nM-NA  | 6      | 0.75860  | 0.03971   | 0.6775    | 0.8397    |
| -NA     | 6      | -0.16410 | 0.03971   | -0.2452   | -0.0830   |
| 50nM+NA | 6      | -0.17971 | 0.03971   | -0.2608   | -0.0986   |
| 5nM+NA  | 6      | -0.15533 | 0.03971   | -0.2364   | -0.0742   |
| +NA     | 6      | -0.14736 | 0.03971   | -0.2285   | -0.0663   |

Std Error uses a pooled estimate of error variance

**Means Comparisons**

**Comparisons with a control using Dunnett's Method**

**Oneway Analysis of 2-ketoglutarate By Label**

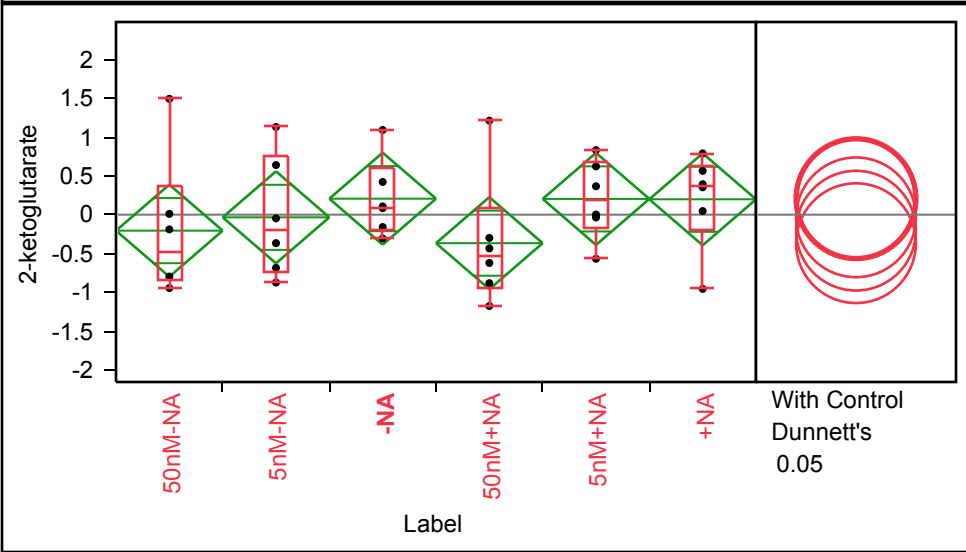

**Quantiles**

| Level   | Minimum  | 10%      | 25%      | Median   | 75%      | 90%      | Maximum  |
|---------|----------|----------|----------|----------|----------|----------|----------|
| 50nM-NA | -0.94591 | -0.94591 | -0.84239 | -0.49318 | 0.381148 | 1.493523 | 1.493523 |
| 5nM-NA  | -0.87473 | -0.87473 | -0.73283 | -0.20739 | 0.762619 | 1.130293 | 1.130293 |
| -NA     | -0.30678 | -0.30678 | -0.19662 | 0.095143 | 0.589327 | 1.091615 | 1.091615 |
| 50nM+NA | -1.17701 | -1.17701 | -0.95663 | -0.52832 | 0.078195 | 1.211892 | 1.211892 |
| 5nM+NA  | -0.56835 | -0.56835 | -0.16919 | 0.183976 | 0.675135 | 0.832968 | 0.832968 |
| +NA     | -0.95699 | -0.95699 | -0.2042  | 0.372822 | 0.620723 | 0.789757 | 0.789757 |

**Oneway Anova**

**Summary of Fit**

|                            |          |
|----------------------------|----------|
| Rsquare                    | 0.106519 |
| Adj Rsquare                | -0.0424  |
| Root Mean Square Error     | 0.711456 |
| Mean of Response           | 8.33e-10 |
| Observations (or Sum Wgts) | 36       |

**Analysis of Variance**

| Source   | DF | Sum of Squares | Mean Square | F Ratio | Prob > F |
|----------|----|----------------|-------------|---------|----------|
| Label    | 5  | 1.810328       | 0.362066    | 0.7153  | 0.6169   |
| Error    | 30 | 15.185105      | 0.506170    |         |          |
| C. Total | 35 | 16.995433      |             |         |          |

**Means for Oneway Anova**

| Level   | Number | Mean     | Std Error | Lower 95% | Upper 95% |
|---------|--------|----------|-----------|-----------|-----------|
| 50nM-NA | 6      | -0.20605 | 0.29045   | -0.7992   | 0.38713   |
| 5nM-NA  | 6      | -0.03411 | 0.29045   | -0.6273   | 0.55907   |
| -NA     | 6      | 0.20619  | 0.29045   | -0.3870   | 0.79937   |
| 50nM+NA | 6      | -0.36744 | 0.29045   | -0.9606   | 0.22574   |
| 5nM+NA  | 6      | 0.20316  | 0.29045   | -0.3900   | 0.79634   |
| +NA     | 6      | 0.19825  | 0.29045   | -0.3949   | 0.79143   |

Std Error uses a pooled estimate of error variance

**Means Comparisons**

**Comparisons with a control using Dunnett's Method**

**Oneway Analysis of Ala-Ala By Label**

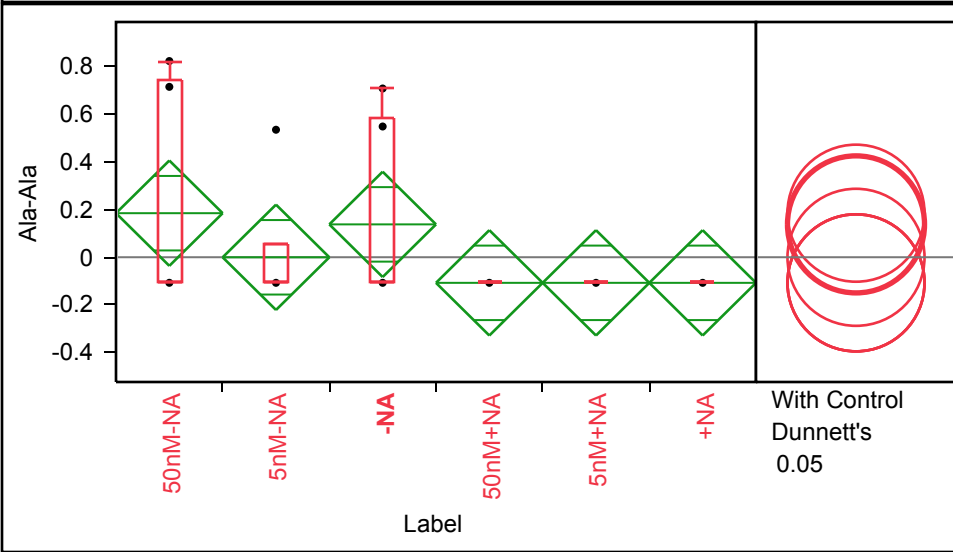

**Quantiles**

| Level   | Minimum  | 10%      | 25%      | Median   | 75%      | 90%      | Maximum  |
|---------|----------|----------|----------|----------|----------|----------|----------|
| 50nM-NA | -0.10719 | -0.10719 | -0.10717 | -0.10715 | 0.74087  | 0.821913 | 0.821913 |
| 5nM-NA  | -0.10723 | -0.10723 | -0.10722 | -0.10717 | 0.053162 | 0.534126 | 0.534126 |
| -NA     | -0.1072  | -0.1072  | -0.1072  | -0.10719 | 0.587501 | 0.706901 | 0.706901 |
| 50nM+NA | -0.10731 | -0.10731 | -0.10731 | -0.10729 | -0.10726 | -0.10725 | -0.10725 |
| 5nM+NA  | -0.10732 | -0.10732 | -0.10728 | -0.10726 | -0.10725 | -0.10723 | -0.10723 |
| +NA     | -0.10749 | -0.10749 | -0.10733 | -0.10726 | -0.10726 | -0.10725 | -0.10725 |

**Oneway Anova**

**Summary of Fit**

|                            |          |
|----------------------------|----------|
| Rsquare                    | 0.199925 |
| Adj Rsquare                | 0.066579 |
| Root Mean Square Error     | 0.26467  |
| Mean of Response           | -3.1e-18 |
| Observations (or Sum Wgts) | 36       |

**Analysis of Variance**

| Source   | DF | Sum of Squares | Mean Square | F Ratio | Prob > F |
|----------|----|----------------|-------------|---------|----------|
| Label    | 5  | 0.5251301      | 0.105026    | 1.4993  | 0.2196   |
| Error    | 30 | 2.1015027      | 0.070050    |         |          |
| C. Total | 35 | 2.6266328      |             |         |          |

**Means for Oneway Anova**

| Level   | Number | Mean     | Std Error | Lower 95% | Upper 95% |
|---------|--------|----------|-----------|-----------|-----------|
| 50nM-NA | 6      | 0.18452  | 0.10805   | -0.0361   | 0.40519   |
| 5nM-NA  | 6      | -0.00030 | 0.10805   | -0.2210   | 0.22037   |
| -NA     | 6      | 0.13764  | 0.10805   | -0.0830   | 0.35831   |
| 50nM+NA | 6      | -0.10729 | 0.10805   | -0.3280   | 0.11338   |
| 5nM+NA  | 6      | -0.10727 | 0.10805   | -0.3279   | 0.11340   |
| +NA     | 6      | -0.10730 | 0.10805   | -0.3280   | 0.11337   |

Std Error uses a pooled estimate of error variance

**Means Comparisons**

**Comparisons with a control using Dunnnett's Method**



**Oneway Analysis of Ala-Gln By Label**

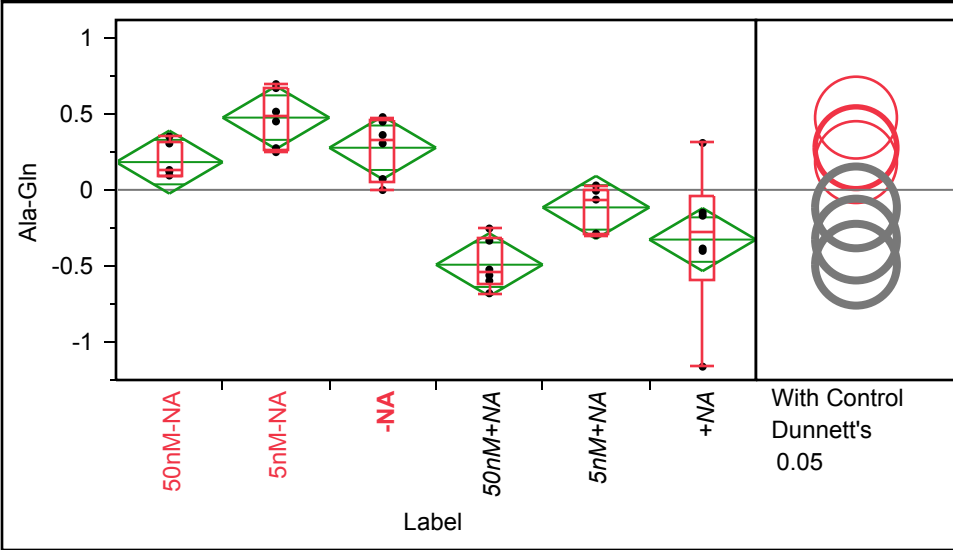

**Quantiles**

| Level   | Minimum  | 10%      | 25%      | Median   | 75%      | 90%      | Maximum  |
|---------|----------|----------|----------|----------|----------|----------|----------|
| 50nM-NA | 0.093716 | 0.093716 | 0.09404  | 0.125679 | 0.316317 | 0.350832 | 0.350832 |
| 5nM-NA  | 0.247914 | 0.247914 | 0.267383 | 0.481877 | 0.675582 | 0.695034 | 0.695034 |
| -NA     | -0.00126 | -0.00126 | 0.052998 | 0.332624 | 0.455643 | 0.478235 | 0.478235 |
| 50nM+NA | -0.67983 | -0.67983 | -0.61878 | -0.54303 | -0.31404 | -0.25411 | -0.25411 |
| 5nM+NA  | -0.29731 | -0.29731 | -0.2901  | -0.0651  | 0.002759 | 0.028823 | 0.028823 |
| +NA     | -1.16246 | -1.16246 | -0.59149 | -0.27786 | -0.0355  | 0.308216 | 0.308216 |

**Oneway Anova**

**Summary of Fit**

|                            |          |
|----------------------------|----------|
| Rsquare                    | 0.694225 |
| Adj Rsquare                | 0.643263 |
| Root Mean Square Error     | 0.247938 |
| Mean of Response           | 2.78e-11 |
| Observations (or Sum Wgts) | 36       |

**Analysis of Variance**

| Source   | DF | Sum of Squares | Mean Square | F Ratio | Prob > F |
|----------|----|----------------|-------------|---------|----------|
| Label    | 5  | 4.1870285      | 0.837406    | 13.6223 | <.0001 * |
| Error    | 30 | 1.8441945      | 0.061473    |         |          |
| C. Total | 35 | 6.0312229      |             |         |          |

**Means for Oneway Anova**

| Level   | Number | Mean     | Std Error | Lower 95% | Upper 95% |
|---------|--------|----------|-----------|-----------|-----------|
| 50nM-NA | 6      | 0.18248  | 0.10122   | -0.0242   | 0.3892    |
| 5nM-NA  | 6      | 0.47495  | 0.10122   | 0.2682    | 0.6817    |
| -NA     | 6      | 0.27690  | 0.10122   | 0.0702    | 0.4836    |
| 50nM+NA | 6      | -0.49207 | 0.10122   | -0.6988   | -0.2854   |
| 5nM+NA  | 6      | -0.11539 | 0.10122   | -0.3221   | 0.0913    |
| +NA     | 6      | -0.32687 | 0.10122   | -0.5336   | -0.1201   |

Std Error uses a pooled estimate of error variance

**Means Comparisons**

**Comparisons with a control using Dunnett's Method**

**Oneway Analysis of Ala-Gly By Label**

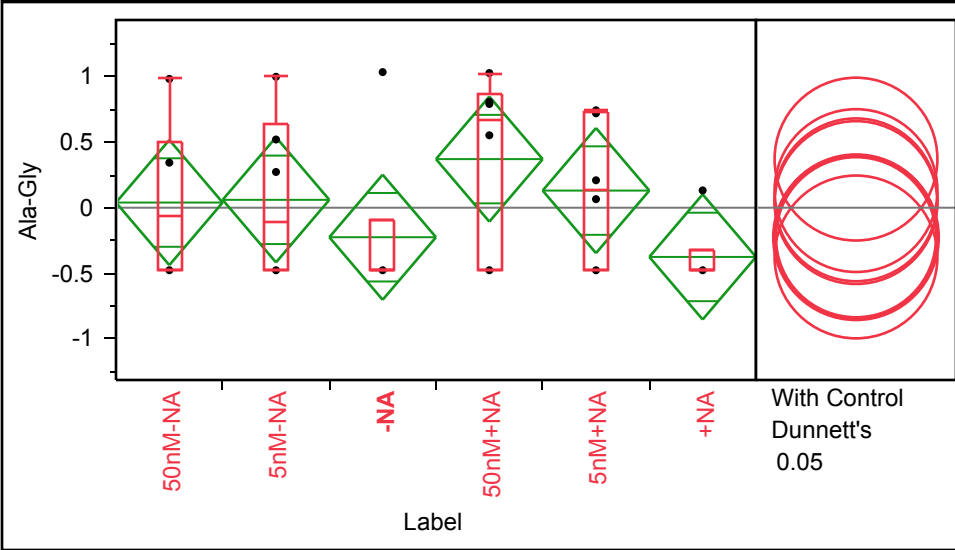

**Quantiles**

| Level   | Minimum  | 10%      | 25%      | Median   | 75%      | 90%      | Maximum  |
|---------|----------|----------|----------|----------|----------|----------|----------|
| 50nM-NA | -0.47801 | -0.47801 | -0.47801 | -0.06801 | 0.504391 | 0.984552 | 0.984552 |
| 5nM-NA  | -0.47803 | -0.47803 | -0.47803 | -0.10241 | 0.641164 | 1.000718 | 1.000718 |
| -NA     | -0.47804 | -0.47804 | -0.47803 | -0.47802 | -0.09942 | 1.036363 | 1.036363 |
| 50nM+NA | -0.47806 | -0.47806 | -0.47805 | 0.673125 | 0.864374 | 1.029091 | 1.029091 |
| 5nM+NA  | -0.47808 | -0.47808 | -0.47806 | 0.13759  | 0.727369 | 0.744591 | 0.744591 |
| +NA     | -0.47816 | -0.47816 | -0.47808 | -0.47805 | -0.3255  | 0.132148 | 0.132148 |

**Oneway Anova**

**Summary of Fit**

|                            |          |
|----------------------------|----------|
| Rsquare                    | 0.176612 |
| Adj Rsquare                | 0.039381 |
| Root Mean Square Error     | 0.573587 |
| Mean of Response           | 2.47e-17 |
| Observations (or Sum Wgts) | 36       |

**Analysis of Variance**

| Source   | DF | Sum of Squares | Mean Square | F Ratio | Prob > F |
|----------|----|----------------|-------------|---------|----------|
| Label    | 5  | 2.117076       | 0.423415    | 1.2870  | 0.2955   |
| Error    | 30 | 9.870068       | 0.329002    |         |          |
| C. Total | 35 | 11.987144      |             |         |          |

**Means for Oneway Anova**

| Level   | Number | Mean     | Std Error | Lower 95% | Upper 95% |
|---------|--------|----------|-----------|-----------|-----------|
| 50nM-NA | 6      | 0.03947  | 0.23417   | -0.4388   | 0.51770   |
| 5nM-NA  | 6      | 0.06019  | 0.23417   | -0.4180   | 0.53842   |
| -NA     | 6      | -0.22563 | 0.23417   | -0.7039   | 0.25261   |
| 50nM+NA | 6      | 0.37145  | 0.23417   | -0.1068   | 0.84968   |
| 5nM+NA  | 6      | 0.13088  | 0.23417   | -0.3474   | 0.60911   |
| +NA     | 6      | -0.37637 | 0.23417   | -0.8546   | 0.10186   |

Std Error uses a pooled estimate of error variance

**Means Comparisons**

**Comparisons with a control using Dunnnett's Method**

**Oneway Analysis of alanine By Label**

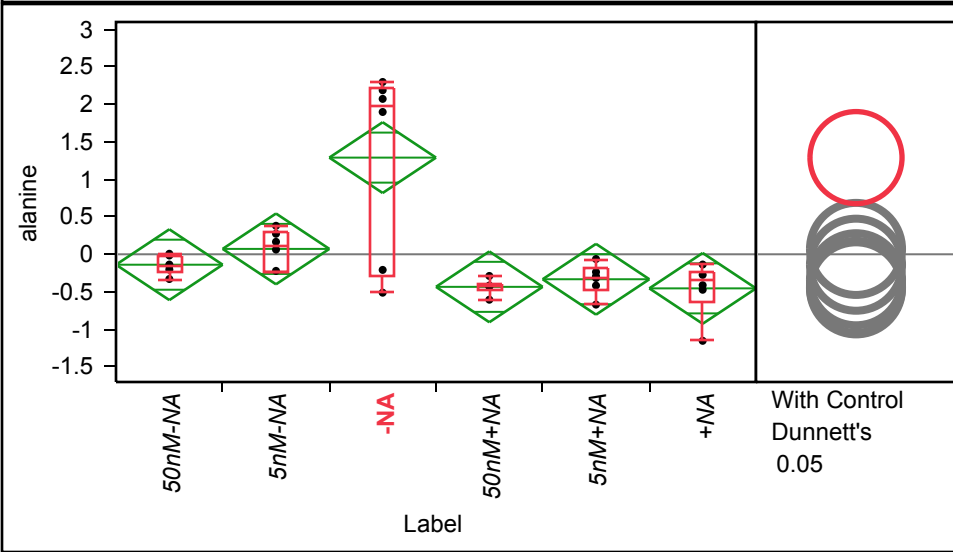

**Quantiles**

| Level   | Minimum  | 10%      | 25%      | Median   | 75%      | 90%      | Maximum  |
|---------|----------|----------|----------|----------|----------|----------|----------|
| 50nM-NA | -0.33011 | -0.33011 | -0.23597 | -0.14537 | -0.01028 | 0.006806 | 0.006806 |
| 5nM-NA  | -0.2316  | -0.2316  | -0.22407 | 0.114643 | 0.300596 | 0.380095 | 0.380095 |
| -NA     | -0.51247 | -0.51247 | -0.28452 | 1.986476 | 2.216588 | 2.29958  | 2.29958  |
| 50nM+NA | -0.60609 | -0.60609 | -0.4763  | -0.43115 | -0.38521 | -0.28922 | -0.28922 |
| 5nM+NA  | -0.6715  | -0.6715  | -0.48095 | -0.30507 | -0.19319 | -0.06327 | -0.06327 |
| +NA     | -1.15486 | -1.15486 | -0.64374 | -0.34482 | -0.24025 | -0.13694 | -0.13694 |

**Oneway Anova**

**Summary of Fit**

|                            |          |
|----------------------------|----------|
| Rsquare                    | 0.577916 |
| Adj Rsquare                | 0.507568 |
| Root Mean Square Error     | 0.56632  |
| Mean of Response           | 8.33e-11 |
| Observations (or Sum Wgts) | 36       |

**Analysis of Variance**

| Source   | DF | Sum of Squares | Mean Square | F Ratio | Prob > F |
|----------|----|----------------|-------------|---------|----------|
| Label    | 5  | 13.173758      | 2.63475     | 8.2152  | <.0001 * |
| Error    | 30 | 9.621542       | 0.32072     |         |          |
| C. Total | 35 | 22.795300      |             |         |          |

**Means for Oneway Anova**

| Level   | Number | Mean    | Std Error | Lower 95% | Upper 95% |
|---------|--------|---------|-----------|-----------|-----------|
| 50nM-NA | 6      | -0.1391 | 0.23120   | -0.6113   | 0.3331    |
| 5nM-NA  | 6      | 0.0717  | 0.23120   | -0.4005   | 0.5439    |
| -NA     | 6      | 1.2901  | 0.23120   | 0.8179    | 1.7622    |
| 50nM+NA | 6      | -0.4346 | 0.23120   | -0.9068   | 0.0375    |
| 5nM+NA  | 6      | -0.3331 | 0.23120   | -0.8053   | 0.1390    |
| +NA     | 6      | -0.4549 | 0.23120   | -0.9271   | 0.0173    |

Std Error uses a pooled estimate of error variance

**Means Comparisons**

**Comparisons with a control using Dunnett's Method**

**Oneway Analysis of allantoinate By Label**

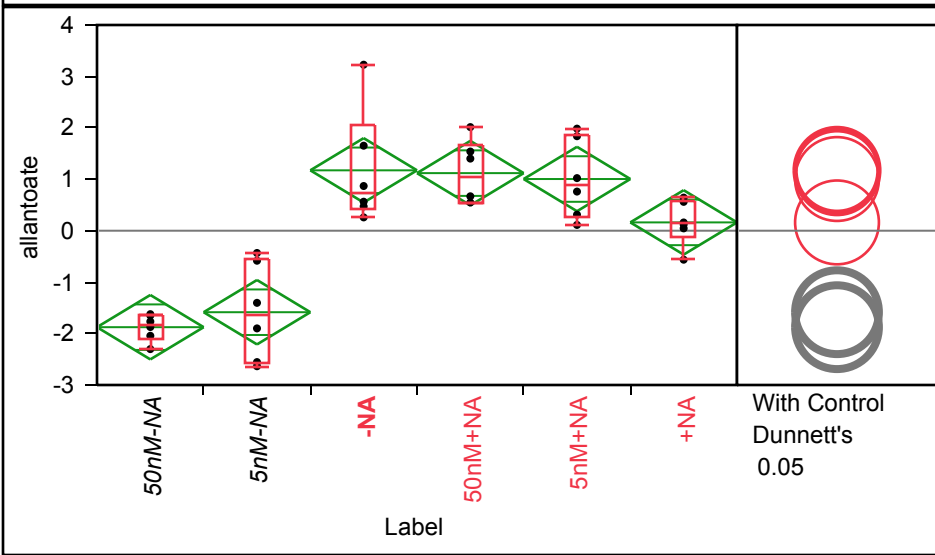

**Quantiles**

| Level   | Minimum  | 10%      | 25%      | Median   | 75%      | 90%      | Maximum  |
|---------|----------|----------|----------|----------|----------|----------|----------|
| 50nM-NA | -2.3021  | -2.3021  | -2.10784 | -1.81933 | -1.6422  | -1.62262 | -1.62262 |
| 5nM-NA  | -2.63509 | -2.63509 | -2.57464 | -1.65102 | -0.54585 | -0.43303 | -0.43303 |
| -NA     | 0.259112 | 0.259112 | 0.418752 | 0.716336 | 2.046761 | 3.227707 | 3.227707 |
| 50nM+NA | 0.544888 | 0.544888 | 0.54753  | 1.035668 | 1.658203 | 2.014638 | 2.014638 |
| 5nM+NA  | 0.112245 | 0.112245 | 0.262022 | 0.891831 | 1.874415 | 1.984756 | 1.984756 |
| +NA     | -0.56335 | -0.56335 | -0.10648 | 0.1412   | 0.581906 | 0.643605 | 0.643605 |

**Oneway Anova**

**Summary of Fit**

|                            |          |
|----------------------------|----------|
| Rsquare                    | 0.77469  |
| Adj Rsquare                | 0.737139 |
| Root Mean Square Error     | 0.7511   |
| Mean of Response           | -8e-17   |
| Observations (or Sum Wgts) | 36       |

**Analysis of Variance**

| Source   | DF | Sum of Squares | Mean Square | F Ratio | Prob > F |
|----------|----|----------------|-------------|---------|----------|
| Label    | 5  | 58.192313      | 11.6385     | 20.6300 | <.0001 * |
| Error    | 30 | 16.924555      | 0.5642      |         |          |
| C. Total | 35 | 75.116869      |             |         |          |

**Means for Oneway Anova**

| Level   | Number | Mean    | Std Error | Lower 95% | Upper 95% |
|---------|--------|---------|-----------|-----------|-----------|
| 50nM-NA | 6      | -1.8759 | 0.30664   | -2.502    | -1.250    |
| 5nM-NA  | 6      | -1.5847 | 0.30664   | -2.211    | -0.958    |
| -NA     | 6      | 1.1741  | 0.30664   | 0.548     | 1.800     |
| 50nM+NA | 6      | 1.1198  | 0.30664   | 0.494     | 1.746     |
| 5nM+NA  | 6      | 1.0050  | 0.30664   | 0.379     | 1.631     |
| +NA     | 6      | 0.1616  | 0.30664   | -0.465    | 0.788     |

Std Error uses a pooled estimate of error variance

**Means Comparisons**

**Comparisons with a control using Dunnett's Method**

**Oneway Analysis of Amino adipic acid By Label**

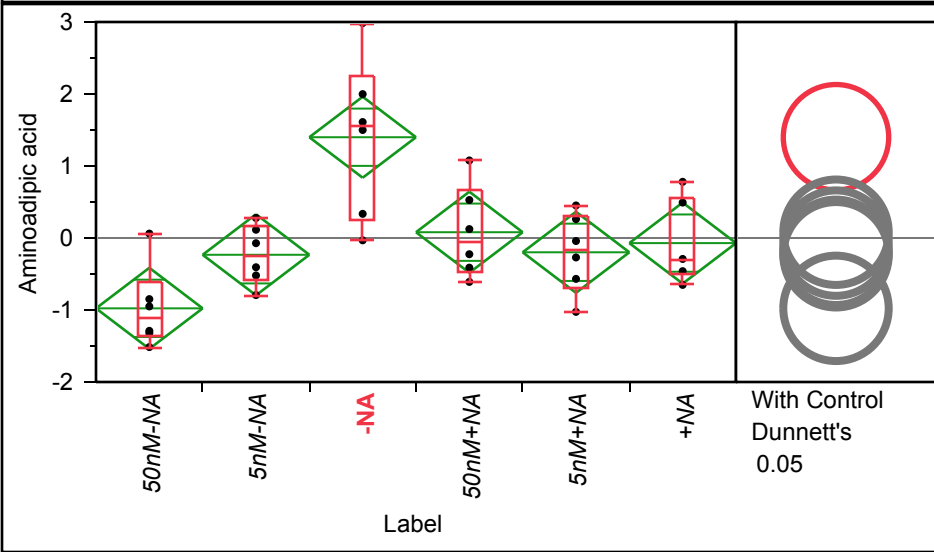

**Quantiles**

| Level   | Minimum  | 10%      | 25%      | Median   | 75%      | 90%      | Maximum  |
|---------|----------|----------|----------|----------|----------|----------|----------|
| 50nM-NA | -1.515   | -1.515   | -1.36867 | -1.11999 | -0.6213  | 0.061246 | 0.061246 |
| 5nM-NA  | -0.79287 | -0.79287 | -0.58837 | -0.23914 | 0.155611 | 0.278174 | 0.278174 |
| -NA     | -0.03214 | -0.03214 | 0.2435   | 1.555245 | 2.24509  | 2.985088 | 2.985088 |
| 50nM+NA | -0.60954 | -0.60954 | -0.46123 | -0.05075 | 0.664668 | 1.076757 | 1.076757 |
| 5nM+NA  | -1.02579 | -1.02579 | -0.68241 | -0.15598 | 0.309536 | 0.451935 | 0.451935 |
| +NA     | -0.65135 | -0.65135 | -0.50822 | -0.29321 | 0.564164 | 0.780206 | 0.780206 |

**Oneway Anova**

**Summary of Fit**

|                            |          |
|----------------------------|----------|
| Rsquare                    | 0.569984 |
| Adj Rsquare                | 0.498315 |
| Root Mean Square Error     | 0.674886 |
| Mean of Response           | 8.33e-10 |
| Observations (or Sum Wgts) | 36       |

**Analysis of Variance**

| Source   | DF | Sum of Squares | Mean Square | F Ratio | Prob > F |
|----------|----|----------------|-------------|---------|----------|
| Label    | 5  | 18.111773      | 3.62235     | 7.9530  | <.0001 * |
| Error    | 30 | 13.664132      | 0.45547     |         |          |
| C. Total | 35 | 31.775904      |             |         |          |

**Means for Oneway Anova**

| Level   | Number | Mean    | Std Error | Lower 95% | Upper 95% |
|---------|--------|---------|-----------|-----------|-----------|
| 50nM-NA | 6      | -0.9771 | 0.27552   | -1.540    | -0.414    |
| 5nM-NA  | 6      | -0.2331 | 0.27552   | -0.796    | 0.330     |
| -NA     | 6      | 1.3995  | 0.27552   | 0.837     | 1.962     |
| 50nM+NA | 6      | 0.0802  | 0.27552   | -0.482    | 0.643     |
| 5nM+NA  | 6      | -0.1986 | 0.27552   | -0.761    | 0.364     |
| +NA     | 6      | -0.0710 | 0.27552   | -0.634    | 0.492     |

Std Error uses a pooled estimate of error variance

**Means Comparisons**

**Comparisons with a control using Dunnett's Method**

**Oneway Analysis of AMP By Label**

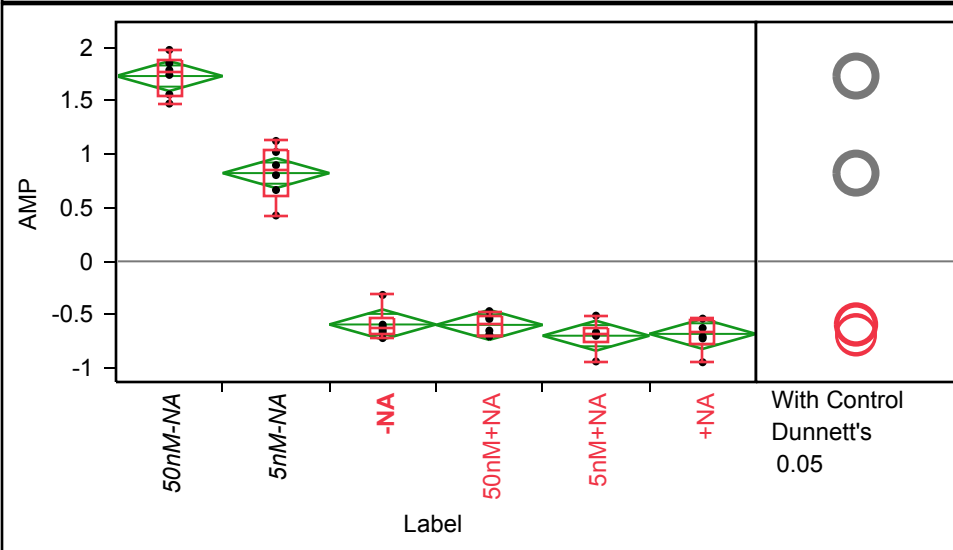

**Quantiles**

| Level   | Minimum  | 10%      | 25%      | Median   | 75%      | 90%      | Maximum  |
|---------|----------|----------|----------|----------|----------|----------|----------|
| 50nM-NA | 1.471958 | 1.471958 | 1.535702 | 1.76212  | 1.879331 | 1.972619 | 1.972619 |
| 5nM-NA  | 0.427989 | 0.427989 | 0.606297 | 0.851264 | 1.046609 | 1.123576 | 1.123576 |
| -NA     | -0.716   | -0.716   | -0.67488 | -0.62631 | -0.52142 | -0.31329 | -0.31329 |
| 50nM+NA | -0.70101 | -0.70101 | -0.68818 | -0.59201 | -0.50856 | -0.46456 | -0.46456 |
| 5nM+NA  | -0.93397 | -0.93397 | -0.75445 | -0.6821  | -0.62414 | -0.50677 | -0.50677 |
| +NA     | -0.94168 | -0.94168 | -0.77513 | -0.66224 | -0.5395  | -0.53435 | -0.53435 |

**Oneway Anova**

**Summary of Fit**

|                            |          |
|----------------------------|----------|
| Rsquare                    | 0.974158 |
| Adj Rsquare                | 0.969852 |
| Root Mean Square Error     | 0.167771 |
| Mean of Response           | 5.556e-9 |
| Observations (or Sum Wgts) | 36       |

**Analysis of Variance**

| Source   | DF | Sum of Squares | Mean Square | F Ratio  | Prob > F |
|----------|----|----------------|-------------|----------|----------|
| Label    | 5  | 31.832244      | 6.36645     | 226.1842 | <.0001 * |
| Error    | 30 | 0.844415       | 0.02815     |          |          |
| C. Total | 35 | 32.676660      |             |          |          |

**Means for Oneway Anova**

| Level   | Number | Mean    | Std Error | Lower 95% | Upper 95% |
|---------|--------|---------|-----------|-----------|-----------|
| 50nM-NA | 6      | 1.7290  | 0.06849   | 1.589     | 1.869     |
| 5nM-NA  | 6      | 0.8235  | 0.06849   | 0.684     | 0.963     |
| -NA     | 6      | -0.5890 | 0.06849   | -0.729    | -0.449    |
| 50nM+NA | 6      | -0.5928 | 0.06849   | -0.733    | -0.453    |
| 5nM+NA  | 6      | -0.6938 | 0.06849   | -0.834    | -0.554    |
| +NA     | 6      | -0.6769 | 0.06849   | -0.817    | -0.537    |

Std Error uses a pooled estimate of error variance

**Means Comparisons**

**Comparisons with a control using Dunnett's Method**

**Oneway Analysis of Arabitol By Label**

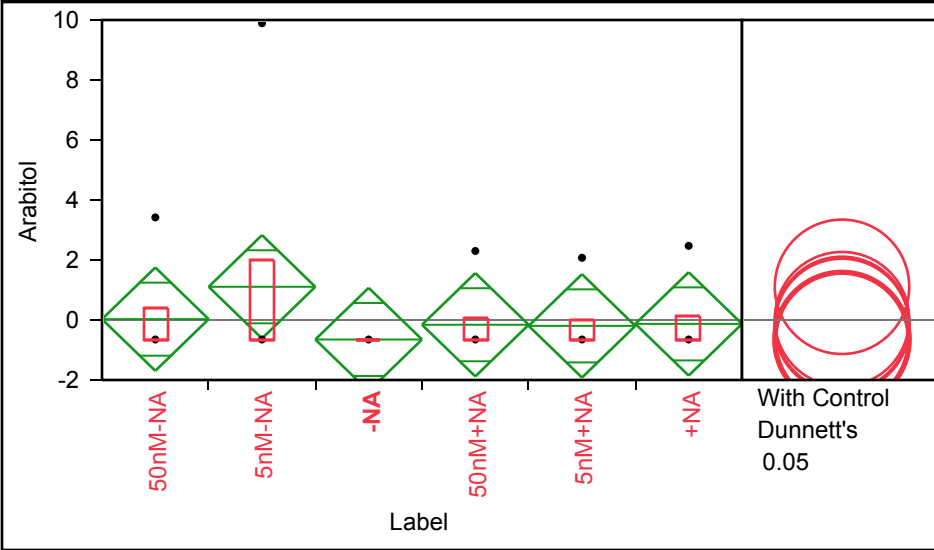

**Quantiles**

| Level   | Minimum  | 10%      | 25%      | Median   | 75%      | 90%      | Maximum  |
|---------|----------|----------|----------|----------|----------|----------|----------|
| 50nM-NA | -0.65021 | -0.65021 | -0.65021 | -0.6502  | 0.367214 | 3.419454 | 3.419454 |
| 5nM-NA  | -0.65021 | -0.65021 | -0.65021 | -0.6502  | 1.985248 | 9.891594 | 9.891594 |
| -NA     | -0.65021 | -0.65021 | -0.65021 | -0.65021 | -0.65021 | -0.65021 | -0.65021 |
| 50nM+NA | -0.65022 | -0.65022 | -0.65022 | -0.65022 | 0.087366 | 2.300105 | 2.300105 |
| 5nM+NA  | -0.65022 | -0.65022 | -0.65022 | -0.65022 | 0.030781 | 2.073764 | 2.073764 |
| +NA     | -0.65025 | -0.65025 | -0.65022 | -0.65022 | 0.130257 | 2.471673 | 2.471673 |

**Oneway Anova**

**Summary of Fit**

|                            |          |
|----------------------------|----------|
| Rsquare                    | 0.074987 |
| Adj Rsquare                | -0.07918 |
| Root Mean Square Error     | 2.065338 |
| Mean of Response           | 5.556e-9 |
| Observations (or Sum Wgts) | 36       |

**Analysis of Variance**

| Source   | DF | Sum of Squares | Mean Square | F Ratio | Prob > F |
|----------|----|----------------|-------------|---------|----------|
| Label    | 5  | 10.37389       | 2.07478     | 0.4864  | 0.7836   |
| Error    | 30 | 127.96863      | 4.26562     |         |          |
| C. Total | 35 | 138.34252      |             |         |          |

**Means for Oneway Anova**

| Level   | Number | Mean    | Std Error | Lower 95% | Upper 95% |
|---------|--------|---------|-----------|-----------|-----------|
| 50nM-NA | 6      | 0.0281  | 0.84317   | -1.694    | 1.7501    |
| 5nM-NA  | 6      | 1.1068  | 0.84317   | -0.615    | 2.8287    |
| -NA     | 6      | -0.6502 | 0.84317   | -2.372    | 1.0718    |
| 50nM+NA | 6      | -0.1585 | 0.84317   | -1.880    | 1.5635    |
| 5nM+NA  | 6      | -0.1962 | 0.84317   | -1.918    | 1.5258    |
| +NA     | 6      | -0.1299 | 0.84317   | -1.852    | 1.5921    |

Std Error uses a pooled estimate of error variance

**Means Comparisons**

**Comparisons with a control using Dunnett's Method**

**Oneway Analysis of arginine By Label**

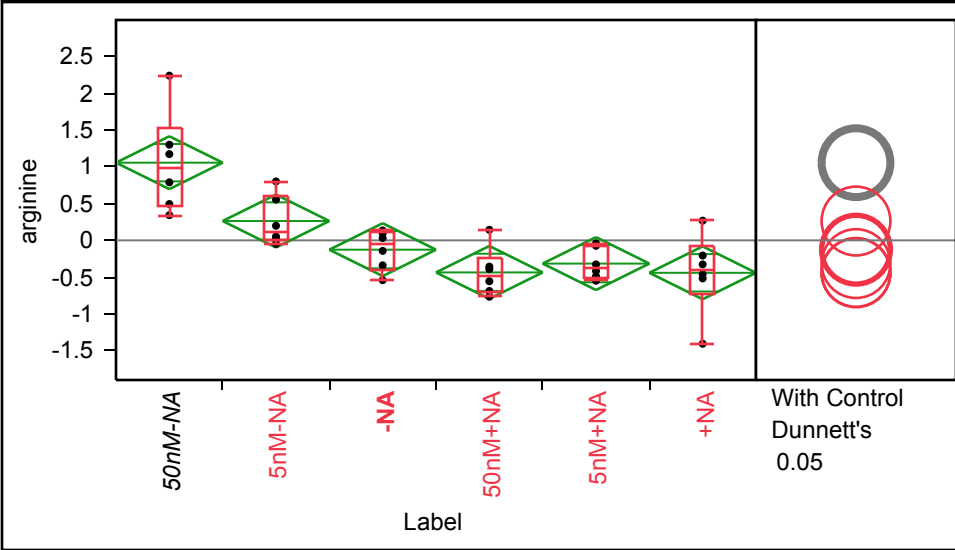

**Quantiles**

| Level   | Minimum  | 10%      | 25%      | Median   | 75%      | 90%      | Maximum  |
|---------|----------|----------|----------|----------|----------|----------|----------|
| 50nM-NA | 0.341555 | 0.341555 | 0.455516 | 0.979464 | 1.533235 | 2.236059 | 2.236059 |
| 5nM-NA  | -0.04755 | -0.04755 | 0.002524 | 0.125067 | 0.615004 | 0.799815 | 0.799815 |
| -NA     | -0.54061 | -0.54061 | -0.38934 | -0.0552  | 0.106139 | 0.134584 | 0.134584 |
| 50nM+NA | -0.76518 | -0.76518 | -0.70643 | -0.47331 | -0.23118 | 0.143738 | 0.143738 |
| 5nM+NA  | -0.54781 | -0.54781 | -0.50176 | -0.37062 | -0.06594 | -0.0423  | -0.0423  |
| +NA     | -1.40326 | -1.40326 | -0.73821 | -0.39207 | -0.0877  | 0.267267 | 0.267267 |

**Oneway Anova**

**Summary of Fit**

|                            |          |
|----------------------------|----------|
| Rsquare                    | 0.644603 |
| Adj Rsquare                | 0.585371 |
| Root Mean Square Error     | 0.430451 |
| Mean of Response           | -2.8e-10 |
| Observations (or Sum Wgts) | 36       |

**Analysis of Variance**

| Source   | DF | Sum of Squares | Mean Square | F Ratio | Prob > F |
|----------|----|----------------|-------------|---------|----------|
| Label    | 5  | 10.082020      | 2.01640     | 10.8825 | <.0001 * |
| Error    | 30 | 5.558637       | 0.18529     |         |          |
| C. Total | 35 | 15.640657      |             |         |          |

**Means for Oneway Anova**

| Level   | Number | Mean    | Std Error | Lower 95% | Upper 95% |
|---------|--------|---------|-----------|-----------|-----------|
| 50nM-NA | 6      | 1.0548  | 0.17573   | 0.6959    | 1.414     |
| 5nM-NA  | 6      | 0.2625  | 0.17573   | -0.0964   | 0.621     |
| -NA     | 6      | -0.1264 | 0.17573   | -0.4853   | 0.232     |
| 50nM+NA | 6      | -0.4352 | 0.17573   | -0.7941   | -0.076    |
| 5nM+NA  | 6      | -0.3153 | 0.17573   | -0.6742   | 0.044     |
| +NA     | 6      | -0.4404 | 0.17573   | -0.7993   | -0.082    |

Std Error uses a pooled estimate of error variance

**Means Comparisons**

**Comparisons with a control using Dunnnett's Method**



**Oneway Analysis of asparagine By Label**

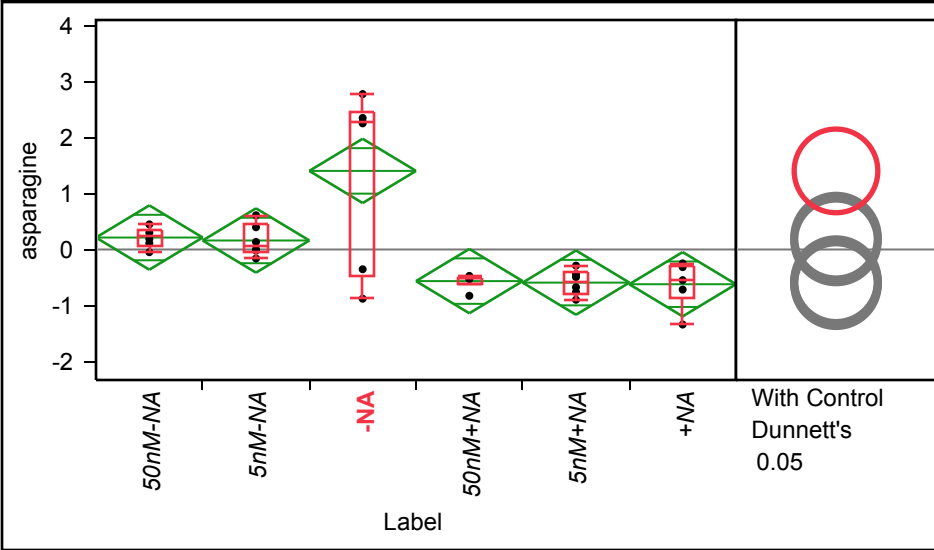

**Quantiles**

| Level   | Minimum  | 10%      | 25%      | Median   | 75%      | 90%      | Maximum  |
|---------|----------|----------|----------|----------|----------|----------|----------|
| 50nM-NA | -0.04822 | -0.04822 | 0.071195 | 0.233942 | 0.336102 | 0.447841 | 0.447841 |
| 5nM-NA  | -0.16099 | -0.16099 | -0.05458 | 0.068104 | 0.449644 | 0.609587 | 0.609587 |
| -NA     | -0.87804 | -0.87804 | -0.48414 | 2.26082  | 2.451371 | 2.770718 | 2.770718 |
| 50nM+NA | -0.82559 | -0.82559 | -0.60599 | -0.5253  | -0.49494 | -0.47147 | -0.47147 |
| 5nM+NA  | -0.89666 | -0.89666 | -0.79275 | -0.58188 | -0.4007  | -0.28797 | -0.28797 |
| +NA     | -1.33816 | -1.33816 | -0.87074 | -0.55109 | -0.29798 | -0.24785 | -0.24785 |

**Oneway Anova**

**Summary of Fit**

|                            |          |
|----------------------------|----------|
| Rsquare                    | 0.566138 |
| Adj Rsquare                | 0.493827 |
| Root Mean Square Error     | 0.687629 |
| Mean of Response           | 5.56e-11 |
| Observations (or Sum Wgts) | 36       |

**Analysis of Variance**

| Source   | DF | Sum of Squares | Mean Square | F Ratio | Prob > F |
|----------|----|----------------|-------------|---------|----------|
| Label    | 5  | 18.509724      | 3.70194     | 7.8293  | <.0001 * |
| Error    | 30 | 14.185020      | 0.47283     |         |          |
| C. Total | 35 | 32.694743      |             |         |          |

**Means for Oneway Anova**

| Level   | Number | Mean    | Std Error | Lower 95% | Upper 95% |
|---------|--------|---------|-----------|-----------|-----------|
| 50nM-NA | 6      | 0.2129  | 0.28072   | -0.360    | 0.786     |
| 5nM-NA  | 6      | 0.1603  | 0.28072   | -0.413    | 0.734     |
| -NA     | 6      | 1.4011  | 0.28072   | 0.828     | 1.974     |
| 50nM+NA | 6      | -0.5639 | 0.28072   | -1.137    | 0.00944   |
| 5nM+NA  | 6      | -0.5908 | 0.28072   | -1.164    | -0.017    |
| +NA     | 6      | -0.6196 | 0.28072   | -1.193    | -0.046    |

Std Error uses a pooled estimate of error variance

**Means Comparisons**

**Comparisons with a control using Dunnett's Method**

**Oneway Analysis of aspartate By Label**

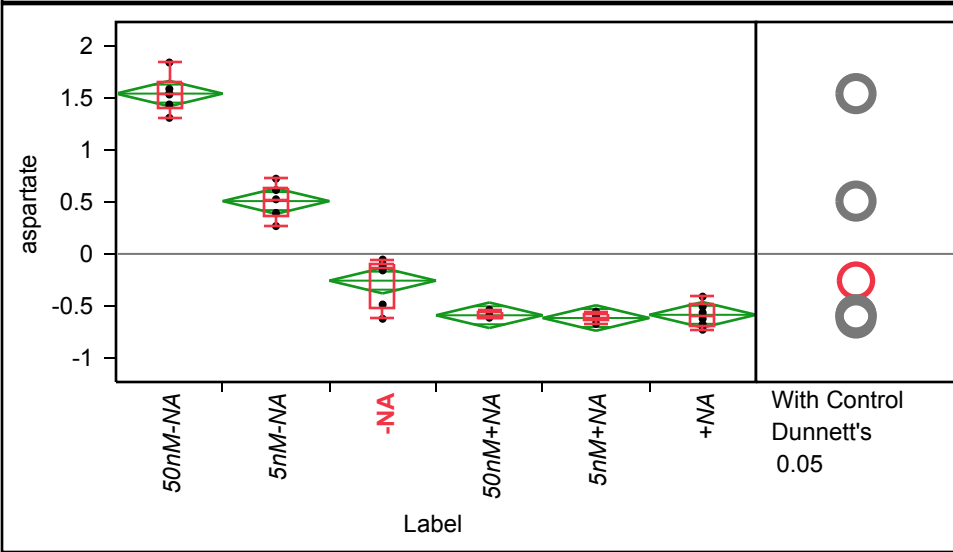

**Quantiles**

| Level   | Minimum  | 10%      | 25%      | Median   | 75%      | 90%      | Maximum  |
|---------|----------|----------|----------|----------|----------|----------|----------|
| 50nM-NA | 1.310418 | 1.310418 | 1.406893 | 1.540827 | 1.652208 | 1.843152 | 1.843152 |
| 5nM-NA  | 0.267961 | 0.267961 | 0.362721 | 0.524807 | 0.642218 | 0.724118 | 0.724118 |
| -NA     | -0.62475 | -0.62475 | -0.52173 | -0.13981 | -0.08784 | -0.05468 | -0.05468 |
| 50nM+NA | -0.62368 | -0.62368 | -0.61783 | -0.60503 | -0.55265 | -0.53863 | -0.53863 |
| 5nM+NA  | -0.67387 | -0.67387 | -0.64451 | -0.62225 | -0.58568 | -0.55471 | -0.55471 |
| +NA     | -0.73026 | -0.73026 | -0.69062 | -0.59538 | -0.48469 | -0.41152 | -0.41152 |

**Oneway Anova**

**Summary of Fit**

|                            |          |
|----------------------------|----------|
| Rsquare                    | 0.972133 |
| Adj Rsquare                | 0.967488 |
| Root Mean Square Error     | 0.147261 |
| Mean of Response           | -1.2e-17 |
| Observations (or Sum Wgts) | 36       |

**Analysis of Variance**

| Source   | DF | Sum of Squares | Mean Square | F Ratio  | Prob > F |
|----------|----|----------------|-------------|----------|----------|
| Label    | 5  | 22.694861      | 4.53897     | 209.3072 | <.0001 * |
| Error    | 30 | 0.650571       | 0.02169     |          |          |
| C. Total | 35 | 23.345432      |             |          |          |

**Means for Oneway Anova**

| Level   | Number | Mean    | Std Error | Lower 95% | Upper 95% |
|---------|--------|---------|-----------|-----------|-----------|
| 50nM-NA | 6      | 1.5438  | 0.06012   | 1.421     | 1.667     |
| 5nM-NA  | 6      | 0.5085  | 0.06012   | 0.386     | 0.631     |
| -NA     | 6      | -0.2576 | 0.06012   | -0.380    | -0.135    |
| 50nM+NA | 6      | -0.5909 | 0.06012   | -0.714    | -0.468    |
| 5nM+NA  | 6      | -0.6173 | 0.06012   | -0.740    | -0.495    |
| +NA     | 6      | -0.5865 | 0.06012   | -0.709    | -0.464    |

Std Error uses a pooled estimate of error variance

**Means Comparisons**

**Comparisons with a control using Dunnett's Method**

**Oneway Analysis of ATP By Label**

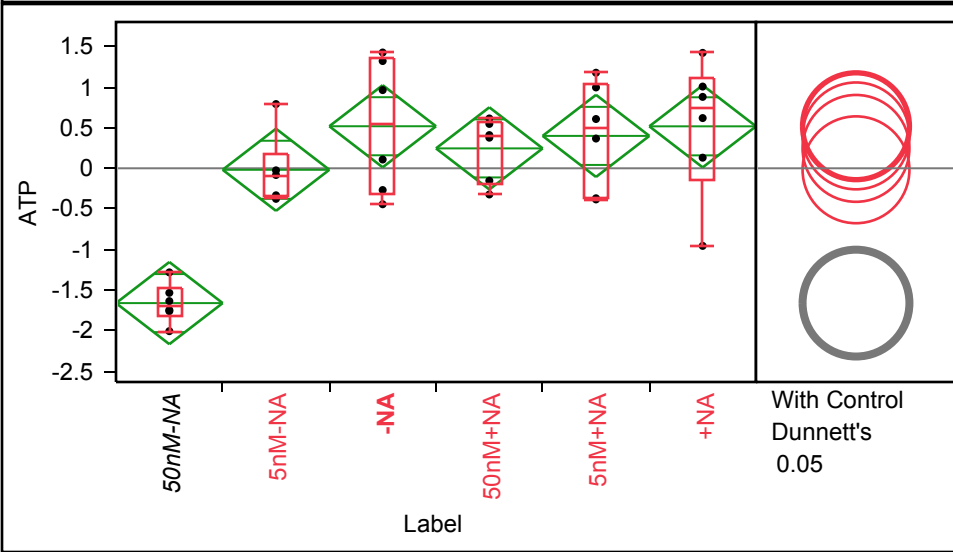

**Quantiles**

| Level   | Minimum  | 10%      | 25%      | Median   | 75%      | 90%      | Maximum  |
|---------|----------|----------|----------|----------|----------|----------|----------|
| 50nM-NA | -2.00361 | -2.00361 | -1.81882 | -1.68846 | -1.4693  | -1.28062 | -1.28062 |
| 5nM-NA  | -0.37574 | -0.37574 | -0.34314 | -0.08349 | 0.178539 | 0.790023 | 0.790023 |
| -NA     | -0.44238 | -0.44238 | -0.31148 | 0.535008 | 1.345649 | 1.424214 | 1.424214 |
| 50nM+NA | -0.3219  | -0.3219  | -0.19497 | 0.392421 | 0.562703 | 0.612926 | 0.612926 |
| 5nM+NA  | -0.38284 | -0.38284 | -0.37244 | 0.486058 | 1.040028 | 1.175568 | 1.175568 |
| +NA     | -0.95448 | -0.95448 | -0.14069 | 0.748144 | 1.108922 | 1.419803 | 1.419803 |

**Oneway Anova**

**Summary of Fit**

|                            |          |
|----------------------------|----------|
| Rsquare                    | 0.656193 |
| Adj Rsquare                | 0.598892 |
| Root Mean Square Error     | 0.605909 |
| Mean of Response           | 5.56e-10 |
| Observations (or Sum Wgts) | 36       |

**Analysis of Variance**

| Source   | DF | Sum of Squares | Mean Square | F Ratio | Prob > F |
|----------|----|----------------|-------------|---------|----------|
| Label    | 5  | 21.020975      | 4.20419     | 11.4517 | <.0001 * |
| Error    | 30 | 11.013769      | 0.36713     |         |          |
| C. Total | 35 | 32.034743      |             |         |          |

**Means for Oneway Anova**

| Level   | Number | Mean    | Std Error | Lower 95% | Upper 95% |
|---------|--------|---------|-----------|-----------|-----------|
| 50nM-NA | 6      | -1.6584 | 0.24736   | -2.164    | -1.153    |
| 5nM-NA  | 6      | -0.0184 | 0.24736   | -0.524    | 0.487     |
| -NA     | 6      | 0.5172  | 0.24736   | 0.012     | 1.022     |
| 50nM+NA | 6      | 0.2449  | 0.24736   | -0.260    | 0.750     |
| 5nM+NA  | 6      | 0.3985  | 0.24736   | -0.107    | 0.904     |
| +NA     | 6      | 0.5162  | 0.24736   | 0.011     | 1.021     |

Std Error uses a pooled estimate of error variance

**Means Comparisons**

**Comparisons with a control using Dunnnett's Method**

**Oneway Analysis of benzenesulfonamine By Label**

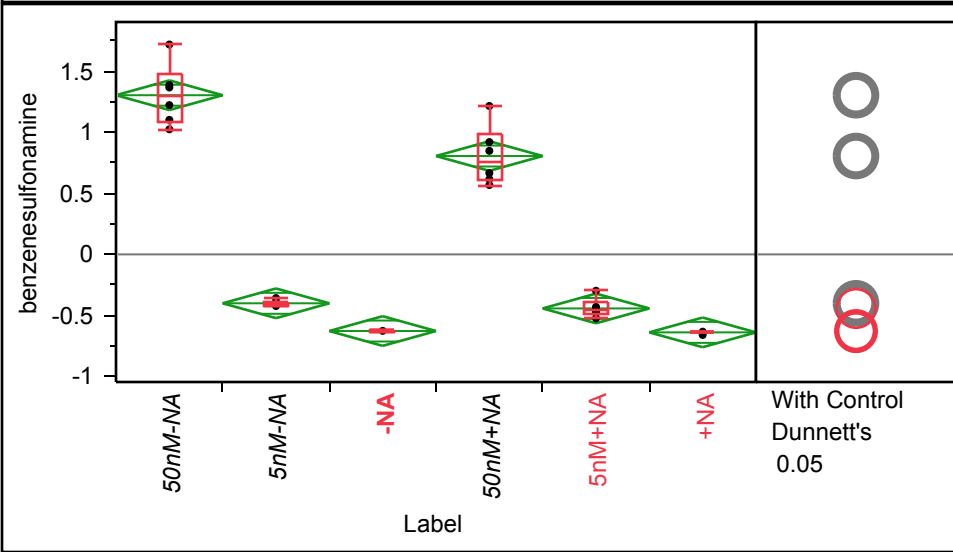

**Quantiles**

| Level   | Minimum  | 10%      | 25%      | Median   | 75%      | 90%      | Maximum  |
|---------|----------|----------|----------|----------|----------|----------|----------|
| 50nM-NA | 1.024381 | 1.024381 | 1.082341 | 1.294399 | 1.469725 | 1.718313 | 1.718313 |
| 5nM-NA  | -0.42285 | -0.42285 | -0.41709 | -0.40847 | -0.38182 | -0.35763 | -0.35763 |
| -NA     | -0.63203 | -0.63203 | -0.6283  | -0.62647 | -0.62622 | -0.62619 | -0.62619 |
| 50nM+NA | 0.567983 | 0.567983 | 0.603761 | 0.756822 | 0.993552 | 1.215238 | 1.215238 |
| 5nM+NA  | -0.52353 | -0.52353 | -0.49135 | -0.46168 | -0.39655 | -0.29768 | -0.29768 |
| +NA     | -0.65946 | -0.65946 | -0.64179 | -0.63432 | -0.63347 | -0.63293 | -0.63293 |

**Oneway Anova**

**Summary of Fit**

|                            |          |
|----------------------------|----------|
| Rsquare                    | 0.970626 |
| Adj Rsquare                | 0.965731 |
| Root Mean Square Error     | 0.145642 |
| Mean of Response           | 2.778e-9 |
| Observations (or Sum Wgts) | 36       |

**Analysis of Variance**

| Source   | DF | Sum of Squares | Mean Square | F Ratio  | Prob > F |
|----------|----|----------------|-------------|----------|----------|
| Label    | 5  | 21.027791      | 4.20556     | 198.2657 | <.0001 * |
| Error    | 30 | 0.636352       | 0.02121     |          |          |
| C. Total | 35 | 21.664143      |             |          |          |

**Means for Oneway Anova**

| Level   | Number | Mean    | Std Error | Lower 95% | Upper 95% |
|---------|--------|---------|-----------|-----------|-----------|
| 50nM-NA | 6      | 1.3033  | 0.05946   | 1.182     | 1.425     |
| 5nM-NA  | 6      | -0.4004 | 0.05946   | -0.522    | -0.279    |
| -NA     | 6      | -0.6274 | 0.05946   | -0.749    | -0.506    |
| 50nM+NA | 6      | 0.8054  | 0.05946   | 0.684     | 0.927     |
| 5nM+NA  | 6      | -0.4425 | 0.05946   | -0.564    | -0.321    |
| +NA     | 6      | -0.6384 | 0.05946   | -0.760    | -0.517    |

Std Error uses a pooled estimate of error variance

**Means Comparisons**

**Comparisons with a control using Dunnett's Method**

**Oneway Analysis of Benzoic acid By Label**

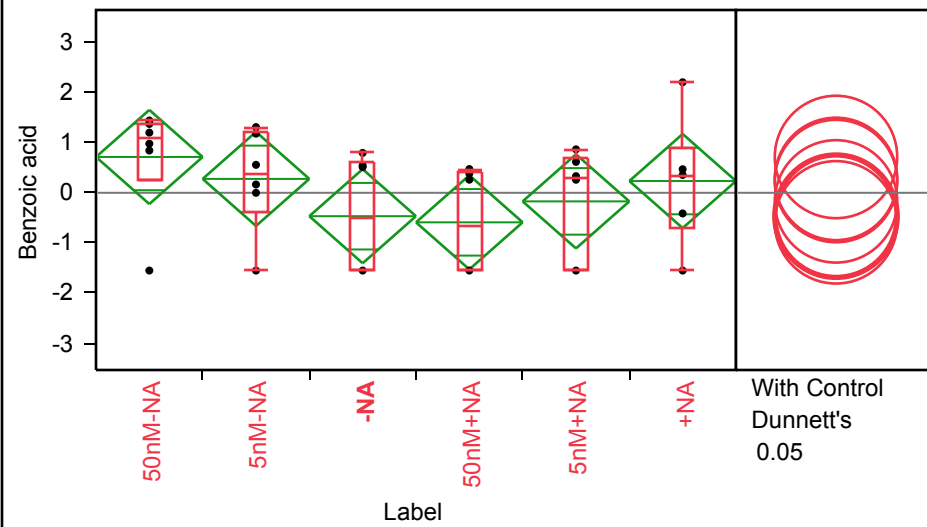

**Quantiles**

| Level   | Minimum  | 10%      | 25%      | Median   | 75%      | 90%      | Maximum  |
|---------|----------|----------|----------|----------|----------|----------|----------|
| 50nM-NA | -1.55259 | -1.55259 | 0.24538  | 1.091126 | 1.392079 | 1.443449 | 1.443449 |
| 5nM-NA  | -1.55259 | -1.55259 | -0.38849 | 0.362338 | 1.213988 | 1.312587 | 1.312587 |
| -NA     | -1.5526  | -1.5526  | -1.5526  | -0.51931 | 0.607826 | 0.796636 | 0.796636 |
| 50nM+NA | -1.55263 | -1.55263 | -1.55262 | -0.64557 | 0.407515 | 0.474107 | 0.474107 |
| 5nM+NA  | -1.55261 | -1.55261 | -1.55261 | 0.296316 | 0.679866 | 0.867563 | 0.867563 |
| +NA     | -1.55261 | -1.55261 | -0.69742 | 0.34799  | 0.904915 | 2.207002 | 2.207002 |

**Oneway Anova**

**Summary of Fit**

|                            |          |
|----------------------------|----------|
| Rsquare                    | 0.163315 |
| Adj Rsquare                | 0.023867 |
| Root Mean Square Error     | 1.126746 |
| Mean of Response           | -2.8e-11 |
| Observations (or Sum Wgts) | 36       |

**Analysis of Variance**

| Source   | DF | Sum of Squares | Mean Square | F Ratio | Prob > F |
|----------|----|----------------|-------------|---------|----------|
| Label    | 5  | 7.434239       | 1.48685     | 1.1712  | 0.3463   |
| Error    | 30 | 38.086671      | 1.26956     |         |          |
| C. Total | 35 | 45.520910      |             |         |          |

**Means for Oneway Anova**

| Level   | Number | Mean     | Std Error | Lower 95% | Upper 95% |
|---------|--------|----------|-----------|-----------|-----------|
| 50nM-NA | 6      | 0.71546  | 0.45999   | -0.224    | 1.6549    |
| 5nM-NA  | 6      | 0.27756  | 0.45999   | -0.662    | 1.2170    |
| -NA     | 6      | -0.46705 | 0.45999   | -1.406    | 0.4724    |
| 50nM+NA | 6      | -0.58950 | 0.45999   | -1.529    | 0.3499    |
| 5nM+NA  | 6      | -0.17129 | 0.45999   | -1.111    | 0.7681    |
| +NA     | 6      | 0.23482  | 0.45999   | -0.705    | 1.1742    |

Std Error uses a pooled estimate of error variance

**Means Comparisons**

**Comparisons with a control using Dunnett's Method**

**Oneway Analysis of beta-Alanine By Label**

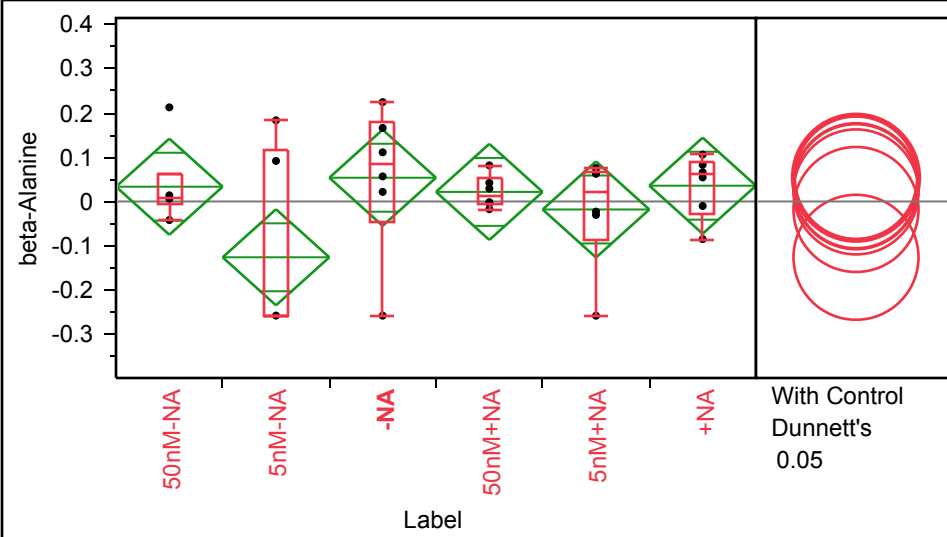

**Quantiles**

| Level   | Minimum  | 10%      | 25%      | Median   | 75%      | 90%      | Maximum  |
|---------|----------|----------|----------|----------|----------|----------|----------|
| 50nM-NA | -0.04208 | -0.04208 | -0.00731 | 0.005731 | 0.063623 | 0.212858 | 0.212858 |
| 5nM-NA  | -0.25832 | -0.25832 | -0.25831 | -0.25818 | 0.114684 | 0.183674 | 0.183674 |
| -NA     | -0.25826 | -0.25826 | -0.04831 | 0.083901 | 0.180879 | 0.224735 | 0.224735 |
| 50nM+NA | -0.0174  | -0.0174  | -0.00755 | 0.013817 | 0.05206  | 0.081597 | 0.081597 |
| 5nM+NA  | -0.25839 | -0.25839 | -0.08746 | 0.01974  | 0.067751 | 0.075451 | 0.075451 |
| +NA     | -0.08517 | -0.08517 | -0.02899 | 0.060211 | 0.088725 | 0.106042 | 0.106042 |

**Oneway Anova**

**Summary of Fit**

|                            |          |
|----------------------------|----------|
| Rsquare                    | 0.205839 |
| Adj Rsquare                | 0.073479 |
| Root Mean Square Error     | 0.130328 |
| Mean of Response           | -5.6e-11 |
| Observations (or Sum Wgts) | 36       |

**Analysis of Variance**

| Source   | DF | Sum of Squares | Mean Square | F Ratio | Prob > F |
|----------|----|----------------|-------------|---------|----------|
| Label    | 5  | 0.13207366     | 0.026415    | 1.5551  | 0.2029   |
| Error    | 30 | 0.50956281     | 0.016985    |         |          |
| C. Total | 35 | 0.64163646     |             |         |          |

**Means for Oneway Anova**

| Level   | Number | Mean     | Std Error | Lower 95% | Upper 95% |
|---------|--------|----------|-----------|-----------|-----------|
| 50nM-NA | 6      | 0.03340  | 0.05321   | -0.0753   | 0.1421    |
| 5nM-NA  | 6      | -0.12627 | 0.05321   | -0.2349   | -0.0176   |
| -NA     | 6      | 0.05370  | 0.05321   | -0.0550   | 0.1624    |
| 50nM+NA | 6      | 0.02163  | 0.05321   | -0.0870   | 0.1303    |
| 5nM+NA  | 6      | -0.01813 | 0.05321   | -0.1268   | 0.0905    |
| +NA     | 6      | 0.03567  | 0.05321   | -0.0730   | 0.1443    |

Std Error uses a pooled estimate of error variance

**Means Comparisons**

**Comparisons with a control using Dunnett's Method**

**Oneway Analysis of beta-D-Glucopyranose By Label**

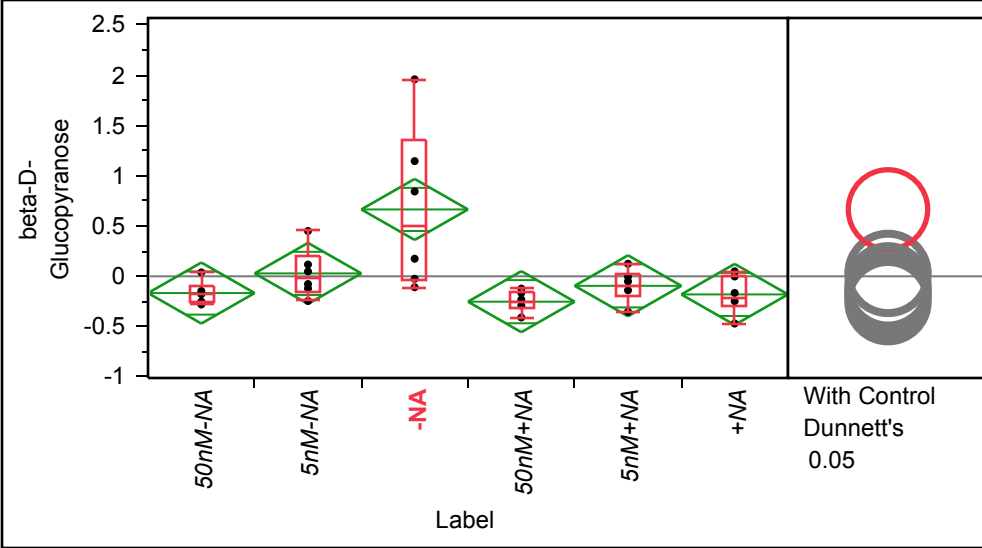

**Quantiles**

| Level   | Minimum  | 10%      | 25%      | Median   | 75%      | 90%      | Maximum  |
|---------|----------|----------|----------|----------|----------|----------|----------|
| 50nM-NA | -0.28035 | -0.28035 | -0.25856 | -0.17994 | -0.09994 | 0.038571 | 0.038571 |
| 5nM-NA  | -0.24528 | -0.24528 | -0.15185 | -0.01427 | 0.200488 | 0.450881 | 0.450881 |
| -NA     | -0.10862 | -0.10862 | -0.04574 | 0.509255 | 1.34933  | 1.959733 | 1.959733 |
| 50nM+NA | -0.40956 | -0.40956 | -0.32392 | -0.26129 | -0.15447 | -0.12243 | -0.12243 |
| 5nM+NA  | -0.35277 | -0.35277 | -0.19958 | -0.09476 | 0.029533 | 0.124679 | 0.124679 |
| +NA     | -0.4699  | -0.4699  | -0.30319 | -0.20627 | 0.011225 | 0.050239 | 0.050239 |

**Oneway Anova**

**Summary of Fit**

|                            |          |
|----------------------------|----------|
| Rsquare                    | 0.465255 |
| Adj Rsquare                | 0.376131 |
| Root Mean Square Error     | 0.363931 |
| Mean of Response           | -5.6e-11 |
| Observations (or Sum Wgts) | 36       |

**Analysis of Variance**

| Source   | DF | Sum of Squares | Mean Square | F Ratio | Prob > F |
|----------|----|----------------|-------------|---------|----------|
| Label    | 5  | 3.4570469      | 0.691409    | 5.2203  | 0.0015 * |
| Error    | 30 | 3.9733804      | 0.132446    |         |          |
| C. Total | 35 | 7.4304273      |             |         |          |

**Means for Oneway Anova**

| Level   | Number | Mean     | Std Error | Lower 95% | Upper 95% |
|---------|--------|----------|-----------|-----------|-----------|
| 50nM-NA | 6      | -0.16651 | 0.14857   | -0.4699   | 0.13692   |
| 5nM-NA  | 6      | 0.02889  | 0.14857   | -0.2745   | 0.33232   |
| -NA     | 6      | 0.66512  | 0.14857   | 0.3617    | 0.96855   |
| 50nM+NA | 6      | -0.25252 | 0.14857   | -0.5559   | 0.05091   |
| 5nM+NA  | 6      | -0.09472 | 0.14857   | -0.3981   | 0.20871   |
| +NA     | 6      | -0.18027 | 0.14857   | -0.4837   | 0.12316   |

Std Error uses a pooled estimate of error variance

**Means Comparisons**

**Comparisons with a control using Dunnett's Method**

**Oneway Analysis of betaine By Label**

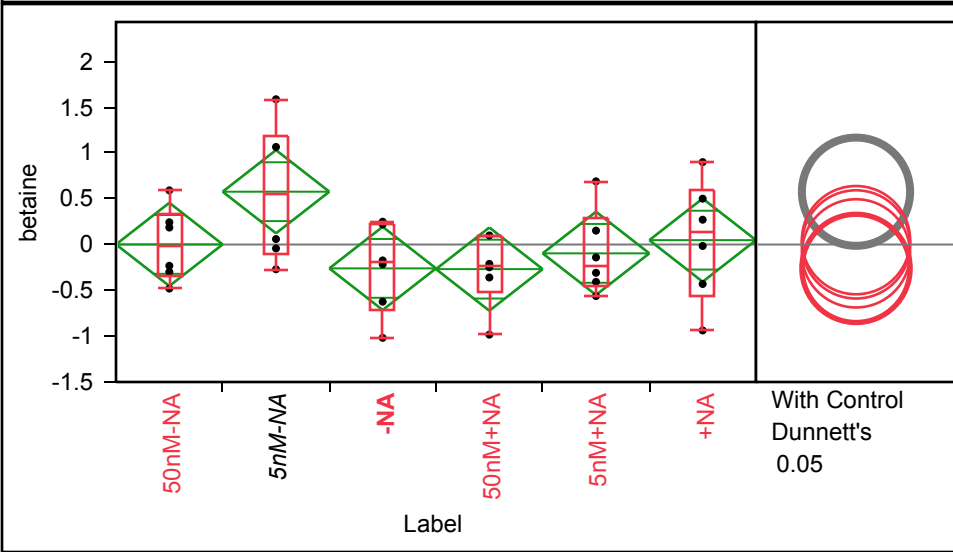

**Quantiles**

| Level   | Minimum  | 10%      | 25%      | Median   | 75%      | 90%      | Maximum  |
|---------|----------|----------|----------|----------|----------|----------|----------|
| 50nM-NA | -0.48059 | -0.48059 | -0.34412 | -0.02346 | 0.329556 | 0.590633 | 0.590633 |
| 5nM-NA  | -0.26988 | -0.26988 | -0.09954 | 0.560723 | 1.194409 | 1.584702 | 1.584702 |
| -NA     | -1.01834 | -1.01834 | -0.72222 | -0.19476 | 0.22749  | 0.248821 | 0.248821 |
| 50nM+NA | -0.98315 | -0.98315 | -0.51557 | -0.22996 | 0.095243 | 0.098793 | 0.098793 |
| 5nM+NA  | -0.56225 | -0.56225 | -0.4462  | -0.22474 | 0.285814 | 0.689184 | 0.689184 |
| +NA     | -0.9374  | -0.9374  | -0.55737 | 0.127495 | 0.599841 | 0.898891 | 0.898891 |

**Oneway Anova**

**Summary of Fit**

|                            |          |
|----------------------------|----------|
| Rsquare                    | 0.24602  |
| Adj Rsquare                | 0.120357 |
| Root Mean Square Error     | 0.544377 |
| Mean of Response           | 2.78e-10 |
| Observations (or Sum Wgts) | 36       |

**Analysis of Variance**

| Source   | DF | Sum of Squares | Mean Square | F Ratio | Prob > F |
|----------|----|----------------|-------------|---------|----------|
| Label    | 5  | 2.900898       | 0.580180    | 1.9578  | 0.1141   |
| Error    | 30 | 8.890388       | 0.296346    |         |          |
| C. Total | 35 | 11.791286      |             |         |          |

**Means for Oneway Anova**

| Level   | Number | Mean     | Std Error | Lower 95% | Upper 95% |
|---------|--------|----------|-----------|-----------|-----------|
| 50nM-NA | 6      | 0.00117  | 0.22224   | -0.4527   | 0.4550    |
| 5nM-NA  | 6      | 0.57630  | 0.22224   | 0.1224    | 1.0302    |
| -NA     | 6      | -0.26036 | 0.22224   | -0.7142   | 0.1935    |
| 50nM+NA | 6      | -0.26832 | 0.22224   | -0.7222   | 0.1856    |
| 5nM+NA  | 6      | -0.09645 | 0.22224   | -0.5503   | 0.3574    |
| +NA     | 6      | 0.04766  | 0.22224   | -0.4062   | 0.5015    |

Std Error uses a pooled estimate of error variance

**Means Comparisons**

**Comparisons with a control using Dunnnett's Method**



**Oneway Analysis of betaine aldehyde By Label**

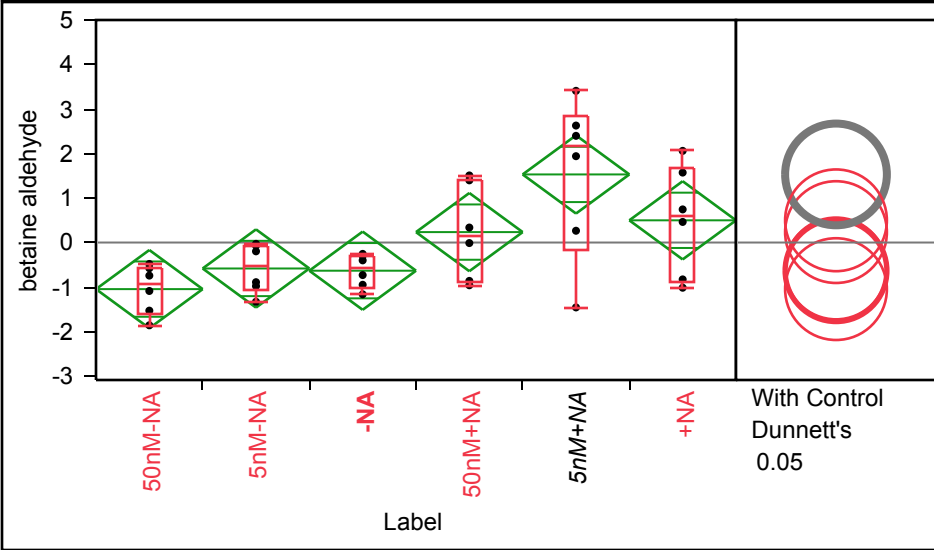

**Quantiles**

| Level   | Minimum  | 10%      | 25%      | Median   | 75%      | 90%      | Maximum  |
|---------|----------|----------|----------|----------|----------|----------|----------|
| 50nM-NA | -1.85923 | -1.85923 | -1.61262 | -0.91587 | -0.55408 | -0.48166 | -0.48166 |
| 5nM-NA  | -1.3312  | -1.3312  | -1.06732 | -0.54435 | -0.06003 | -0.03038 | -0.03038 |
| -NA     | -1.16369 | -1.16369 | -1.00305 | -0.56581 | -0.28751 | -0.25555 | -0.25555 |
| 50nM+NA | -0.96032 | -0.96032 | -0.88684 | 0.162134 | 1.424749 | 1.506961 | 1.506961 |
| 5nM+NA  | -1.45797 | -1.45797 | -0.16604 | 2.168534 | 2.823115 | 3.40828  | 3.40828  |
| +NA     | -1.01558 | -1.01558 | -0.87544 | 0.603374 | 1.693602 | 2.059235 | 2.059235 |

**Oneway Anova**

**Summary of Fit**

|                            |          |
|----------------------------|----------|
| Rsquare                    | 0.446639 |
| Adj Rsquare                | 0.354412 |
| Root Mean Square Error     | 1.053807 |
| Mean of Response           | -5.6e-10 |
| Observations (or Sum Wgts) | 36       |

**Analysis of Variance**

| Source   | DF | Sum of Squares | Mean Square | F Ratio | Prob > F |
|----------|----|----------------|-------------|---------|----------|
| Label    | 5  | 26.890027      | 5.37801     | 4.8428  | 0.0023 * |
| Error    | 30 | 33.315265      | 1.11051     |         |          |
| C. Total | 35 | 60.205292      |             |         |          |

**Means for Oneway Anova**

| Level   | Number | Mean    | Std Error | Lower 95% | Upper 95% |
|---------|--------|---------|-----------|-----------|-----------|
| 50nM-NA | 6      | -1.0469 | 0.43021   | -1.925    | -0.168    |
| 5nM-NA  | 6      | -0.5833 | 0.43021   | -1.462    | 0.295     |
| -NA     | 6      | -0.6331 | 0.43021   | -1.512    | 0.246     |
| 50nM+NA | 6      | 0.2343  | 0.43021   | -0.644    | 1.113     |
| 5nM+NA  | 6      | 1.5300  | 0.43021   | 0.651     | 2.409     |
| +NA     | 6      | 0.4989  | 0.43021   | -0.380    | 1.378     |

Std Error uses a pooled estimate of error variance

**Means Comparisons**

**Comparisons with a control using Dunnett's Method**

**Oneway Analysis of Butyrylcarnitine By Label**

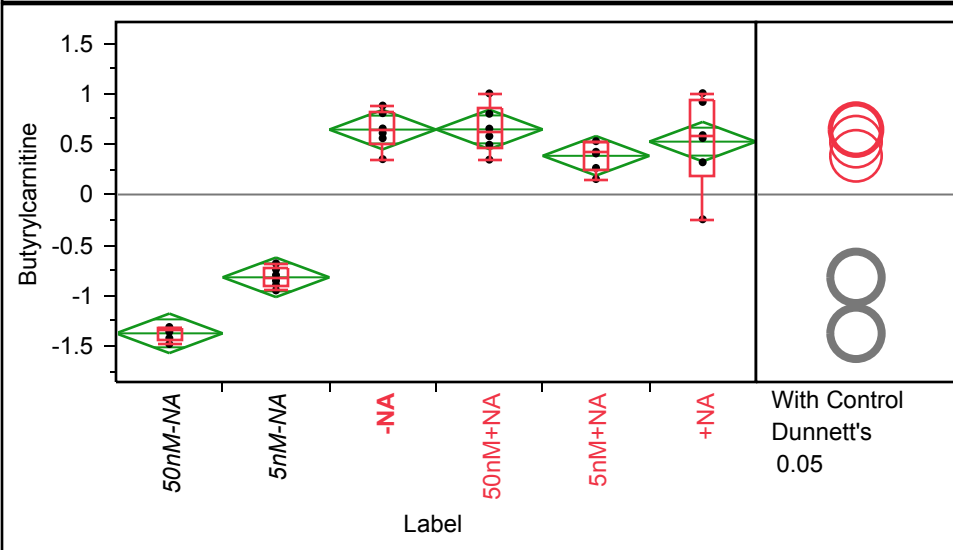

**Quantiles**

| Level   | Minimum  | 10%      | 25%      | Median   | 75%      | 90%      | Maximum  |
|---------|----------|----------|----------|----------|----------|----------|----------|
| 50nM-NA | -1.4806  | -1.4806  | -1.43706 | -1.34896 | -1.32941 | -1.31192 | -1.31192 |
| 5nM-NA  | -0.94974 | -0.94974 | -0.91012 | -0.82517 | -0.72622 | -0.68147 | -0.68147 |
| -NA     | 0.350138 | 0.350138 | 0.505764 | 0.631652 | 0.824414 | 0.880772 | 0.880772 |
| 50nM+NA | 0.345464 | 0.345464 | 0.456256 | 0.615103 | 0.85001  | 1.001311 | 1.001311 |
| 5nM+NA  | 0.153109 | 0.153109 | 0.235646 | 0.414672 | 0.52601  | 0.528238 | 0.528238 |
| +NA     | -0.24528 | -0.24528 | 0.178164 | 0.573357 | 0.938773 | 1.003548 | 1.003548 |

**Oneway Anova**

**Summary of Fit**

|                            |          |
|----------------------------|----------|
| Rsquare                    | 0.932719 |
| Adj Rsquare                | 0.921505 |
| Root Mean Square Error     | 0.234523 |
| Mean of Response           | 5.556e-9 |
| Observations (or Sum Wgts) | 36       |

**Analysis of Variance**

| Source   | DF | Sum of Squares | Mean Square | F Ratio | Prob > F |
|----------|----|----------------|-------------|---------|----------|
| Label    | 5  | 22.874243      | 4.57485     | 83.1778 | <.0001 * |
| Error    | 30 | 1.650026       | 0.05500     |         |          |
| C. Total | 35 | 24.524269      |             |         |          |

**Means for Oneway Anova**

| Level   | Number | Mean    | Std Error | Lower 95% | Upper 95% |
|---------|--------|---------|-----------|-----------|-----------|
| 50nM-NA | 6      | -1.3747 | 0.09574   | -1.570    | -1.179    |
| 5nM-NA  | 6      | -0.8199 | 0.09574   | -1.015    | -0.624    |
| -NA     | 6      | 0.6429  | 0.09574   | 0.447     | 0.838     |
| 50nM+NA | 6      | 0.6450  | 0.09574   | 0.449     | 0.840     |
| 5nM+NA  | 6      | 0.3832  | 0.09574   | 0.188     | 0.579     |
| +NA     | 6      | 0.5236  | 0.09574   | 0.328     | 0.719     |

Std Error uses a pooled estimate of error variance

**Means Comparisons**

**Comparisons with a control using Dunnnett's Method**

**Oneway Analysis of Carbamoyl phosphate By Label**

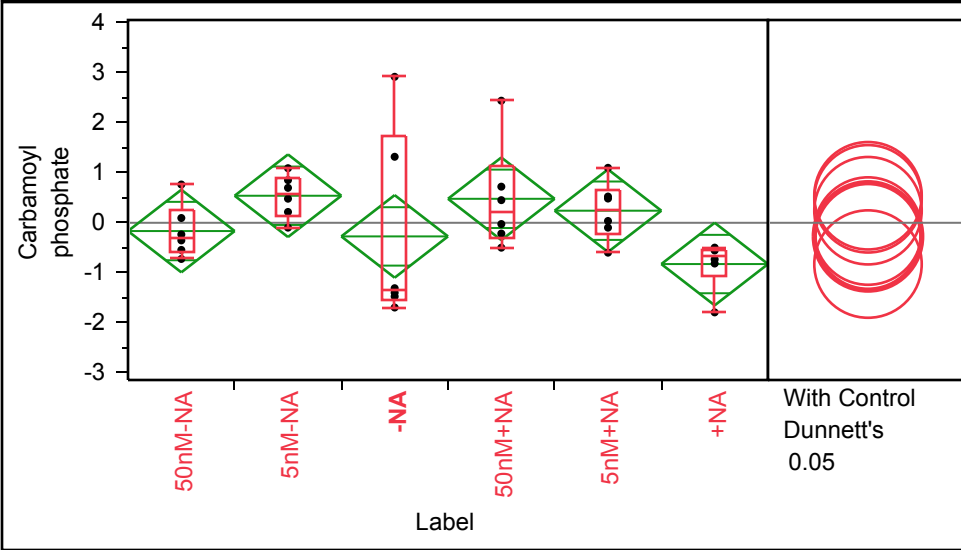

**Quantiles**

| Level   | Minimum  | 10%      | 25%      | Median   | 75%      | 90%      | Maximum  |
|---------|----------|----------|----------|----------|----------|----------|----------|
| 50nM-NA | -0.72338 | -0.72338 | -0.58804 | -0.29266 | 0.263032 | 0.765437 | 0.765437 |
| 5nM-NA  | -0.09676 | -0.09676 | 0.13828  | 0.590331 | 0.912721 | 1.09159  | 1.09159  |
| -NA     | -1.69429 | -1.69429 | -1.52831 | -1.35302 | 1.720078 | 2.919458 | 2.919458 |
| 50nM+NA | -0.49756 | -0.49756 | -0.28602 | 0.214113 | 1.152137 | 2.441499 | 2.441499 |
| 5nM+NA  | -0.59713 | -0.59713 | -0.22241 | 0.260619 | 0.668512 | 1.099196 | 1.099196 |
| +NA     | -1.79148 | -1.79148 | -1.05872 | -0.64714 | -0.53956 | -0.49669 | -0.49669 |

**Oneway Anova**

**Summary of Fit**

|                            |          |
|----------------------------|----------|
| Rsquare                    | 0.217538 |
| Adj Rsquare                | 0.087128 |
| Root Mean Square Error     | 0.990379 |
| Mean of Response           | 2.78e-10 |
| Observations (or Sum Wgts) | 36       |

**Analysis of Variance**

| Source   | DF | Sum of Squares | Mean Square | F Ratio | Prob > F |
|----------|----|----------------|-------------|---------|----------|
| Label    | 5  | 8.180805       | 1.63616     | 1.6681  | 0.1728   |
| Error    | 30 | 29.425496      | 0.98085     |         |          |
| C. Total | 35 | 37.606301      |             |         |          |

**Means for Oneway Anova**

| Level   | Number | Mean     | Std Error | Lower 95% | Upper 95% |
|---------|--------|----------|-----------|-----------|-----------|
| 50nM-NA | 6      | -0.16511 | 0.40432   | -0.991    | 0.6606    |
| 5nM-NA  | 6      | 0.54087  | 0.40432   | -0.285    | 1.3666    |
| -NA     | 6      | -0.27226 | 0.40432   | -1.098    | 0.5535    |
| 50nM+NA | 6      | 0.47983  | 0.40432   | -0.346    | 1.3056    |
| 5nM+NA  | 6      | 0.24179  | 0.40432   | -0.584    | 1.0675    |
| +NA     | 6      | -0.82513 | 0.40432   | -1.651    | 0.0006    |

Std Error uses a pooled estimate of error variance

**Means Comparisons**

**Comparisons with a control using Dunnett's Method**

**Oneway Analysis of Carnitine By Label**

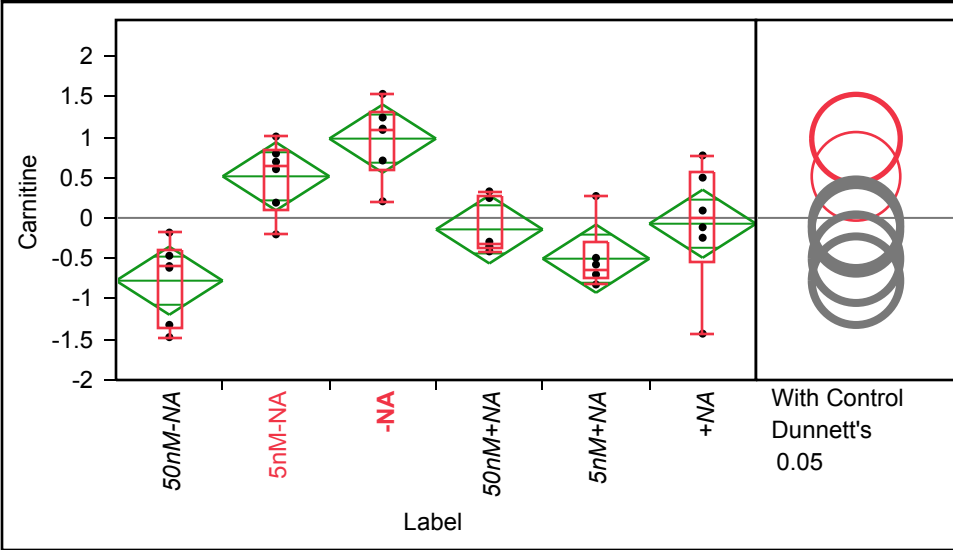

**Quantiles**

| Level   | Minimum  | 10%      | 25%      | Median   | 75%      | 90%      | Maximum  |
|---------|----------|----------|----------|----------|----------|----------|----------|
| 50nM-NA | -1.47478 | -1.47478 | -1.3606  | -0.60606 | -0.396   | -0.18135 | -0.18135 |
| 5nM-NA  | -0.20357 | -0.20357 | 0.090758 | 0.64861  | 0.848176 | 1.006336 | 1.006336 |
| -NA     | 0.205224 | 0.205224 | 0.583619 | 1.096082 | 1.314398 | 1.533388 | 1.533388 |
| 50nM+NA | -0.41446 | -0.41446 | -0.37907 | -0.32211 | 0.266673 | 0.327845 | 0.327845 |
| 5nM+NA  | -0.82354 | -0.82354 | -0.73184 | -0.63852 | -0.30276 | 0.270665 | 0.270665 |
| +NA     | -1.43128 | -1.43128 | -0.54178 | -0.01236 | 0.566524 | 0.772391 | 0.772391 |

**Oneway Anova**

**Summary of Fit**

|                            |          |
|----------------------------|----------|
| Rsquare                    | 0.623278 |
| Adj Rsquare                | 0.560491 |
| Root Mean Square Error     | 0.50475  |
| Mean of Response           | -1.2e-17 |
| Observations (or Sum Wgts) | 36       |

**Analysis of Variance**

| Source   | DF | Sum of Squares | Mean Square | F Ratio | Prob > F |
|----------|----|----------------|-------------|---------|----------|
| Label    | 5  | 12.645458      | 2.52909     | 9.9269  | <.0001 * |
| Error    | 30 | 7.643172       | 0.25477     |         |          |
| C. Total | 35 | 20.288630      |             |         |          |

**Means for Oneway Anova**

| Level   | Number | Mean     | Std Error | Lower 95% | Upper 95% |
|---------|--------|----------|-----------|-----------|-----------|
| 50nM-NA | 6      | -0.77639 | 0.20606   | -1.197    | -0.356    |
| 5nM-NA  | 6      | 0.51405  | 0.20606   | 0.093     | 0.935     |
| -NA     | 6      | 0.98032  | 0.20606   | 0.559     | 1.401     |
| 50nM+NA | 6      | -0.14197 | 0.20606   | -0.563    | 0.279     |
| 5nM+NA  | 6      | -0.50418 | 0.20606   | -0.925    | -0.083    |
| +NA     | 6      | -0.07183 | 0.20606   | -0.493    | 0.349     |

Std Error uses a pooled estimate of error variance

**Means Comparisons**

**Comparisons with a control using Dunnett's Method**

**Oneway Analysis of CDP By Label**

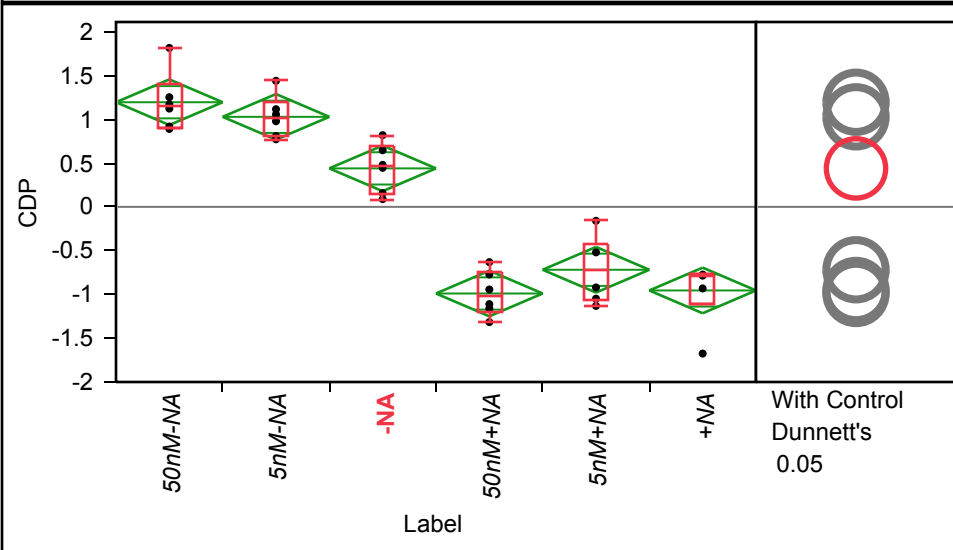

**Quantiles**

| Level   | Minimum  | 10%      | 25%      | Median   | 75%      | 90%      | Maximum  |
|---------|----------|----------|----------|----------|----------|----------|----------|
| 50nM-NA | 0.889531 | 0.889531 | 0.910671 | 1.146803 | 1.393167 | 1.815313 | 1.815313 |
| 5nM-NA  | 0.771454 | 0.771454 | 0.799695 | 1.016577 | 1.196407 | 1.439235 | 1.439235 |
| -NA     | 0.088101 | 0.088101 | 0.13975  | 0.462671 | 0.689955 | 0.818808 | 0.818808 |
| 50nM+NA | -1.31604 | -1.31604 | -1.20032 | -1.02718 | -0.73701 | -0.6314  | -0.6314  |
| 5nM+NA  | -1.13081 | -1.13081 | -1.06932 | -0.72554 | -0.42968 | -0.15936 | -0.15936 |
| +NA     | -1.67547 | -1.67547 | -1.11753 | -0.78555 | -0.77561 | -0.77305 | -0.77305 |

**Oneway Anova**

**Summary of Fit**

|                            |          |
|----------------------------|----------|
| Rsquare                    | 0.912414 |
| Adj Rsquare                | 0.897817 |
| Root Mean Square Error     | 0.312401 |
| Mean of Response           | -4.9e-17 |
| Observations (or Sum Wgts) | 36       |

**Analysis of Variance**

| Source   | DF | Sum of Squares | Mean Square | F Ratio | Prob > F |
|----------|----|----------------|-------------|---------|----------|
| Label    | 5  | 30.500336      | 6.10007     | 62.5045 | <.0001 * |
| Error    | 30 | 2.927822       | 0.09759     |         |          |
| C. Total | 35 | 33.428158      |             |         |          |

**Means for Oneway Anova**

| Level   | Number | Mean    | Std Error | Lower 95% | Upper 95% |
|---------|--------|---------|-----------|-----------|-----------|
| 50nM-NA | 6      | 1.1948  | 0.12754   | 0.934     | 1.455     |
| 5nM-NA  | 6      | 1.0281  | 0.12754   | 0.768     | 1.289     |
| -NA     | 6      | 0.4394  | 0.12754   | 0.179     | 0.700     |
| 50nM+NA | 6      | -0.9893 | 0.12754   | -1.250    | -0.729    |
| 5nM+NA  | 6      | -0.7183 | 0.12754   | -0.979    | -0.458    |
| +NA     | 6      | -0.9546 | 0.12754   | -1.215    | -0.694    |

Std Error uses a pooled estimate of error variance

**Means Comparisons**

**Comparisons with a control using Dunnett's Method**

**Oneway Analysis of Chodroitin By Label**

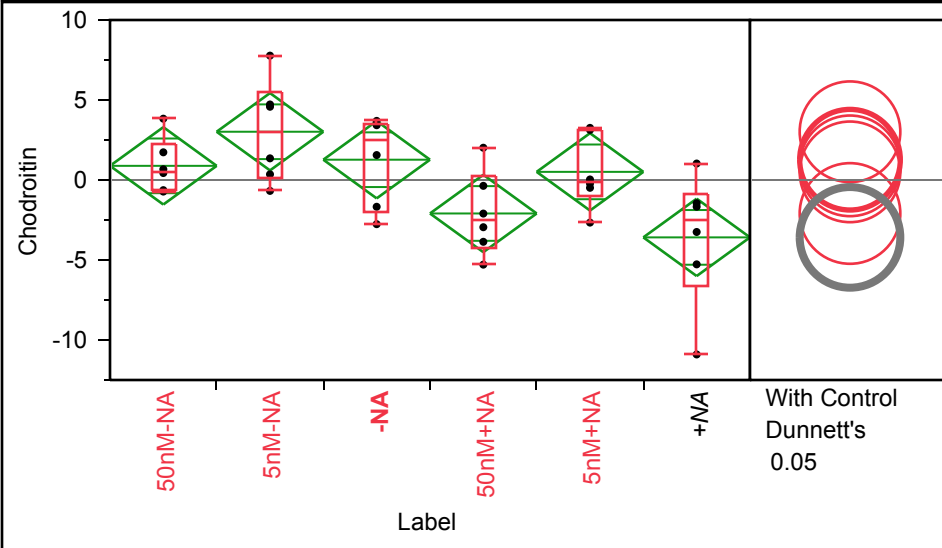

**Quantiles**

| Level   | Minimum  | 10%      | 25%      | Median   | 75%      | 90%      | Maximum  |
|---------|----------|----------|----------|----------|----------|----------|----------|
| 50nM-NA | -0.72371 | -0.72371 | -0.6575  | 0.552296 | 2.255877 | 3.83175  | 3.83175  |
| 5nM-NA  | -0.68085 | -0.68085 | 0.09562  | 2.965578 | 5.48302  | 7.771999 | 7.771999 |
| -NA     | -2.7605  | -2.7605  | -1.94561 | 2.464566 | 3.490823 | 3.693914 | 3.693914 |
| 50nM+NA | -5.28955 | -5.28955 | -4.2195  | -2.52503 | 0.229986 | 2.016652 | 2.016652 |
| 5nM+NA  | -2.66216 | -2.66216 | -1.03167 | -0.09413 | 3.163831 | 3.256941 | 3.256941 |
| +NA     | -10.9036 | -10.9036 | -6.68022 | -2.45846 | -0.83161 | 1.028487 | 1.028487 |

**Oneway Anova**

**Summary of Fit**

|                            |          |
|----------------------------|----------|
| Rsquare                    | 0.408135 |
| Adj Rsquare                | 0.309491 |
| Root Mean Square Error     | 2.899324 |
| Mean of Response           | 8.33e-10 |
| Observations (or Sum Wgts) | 36       |

**Analysis of Variance**

| Source   | DF | Sum of Squares | Mean Square | F Ratio | Prob > F |
|----------|----|----------------|-------------|---------|----------|
| Label    | 5  | 173.89853      | 34.7797     | 4.1374  | 0.0056 * |
| Error    | 30 | 252.18240      | 8.4061      |         |          |
| C. Total | 35 | 426.08093      |             |         |          |

**Means for Oneway Anova**

| Level   | Number | Mean    | Std Error | Lower 95% | Upper 95% |
|---------|--------|---------|-----------|-----------|-----------|
| 50nM-NA | 6      | 0.8846  | 1.1836    | -1.533    | 3.302     |
| 5nM-NA  | 6      | 3.0161  | 1.1836    | 0.599     | 5.433     |
| -NA     | 6      | 1.2686  | 1.1836    | -1.149    | 3.686     |
| 50nM+NA | 6      | -2.0919 | 1.1836    | -4.509    | 0.325     |
| 5nM+NA  | 6      | 0.5085  | 1.1836    | -1.909    | 2.926     |
| +NA     | 6      | -3.5860 | 1.1836    | -6.003    | -1.169    |

Std Error uses a pooled estimate of error variance

**Means Comparisons**

**Comparisons with a control using Dunnett's Method**

**Oneway Analysis of Cholesterol By Label**

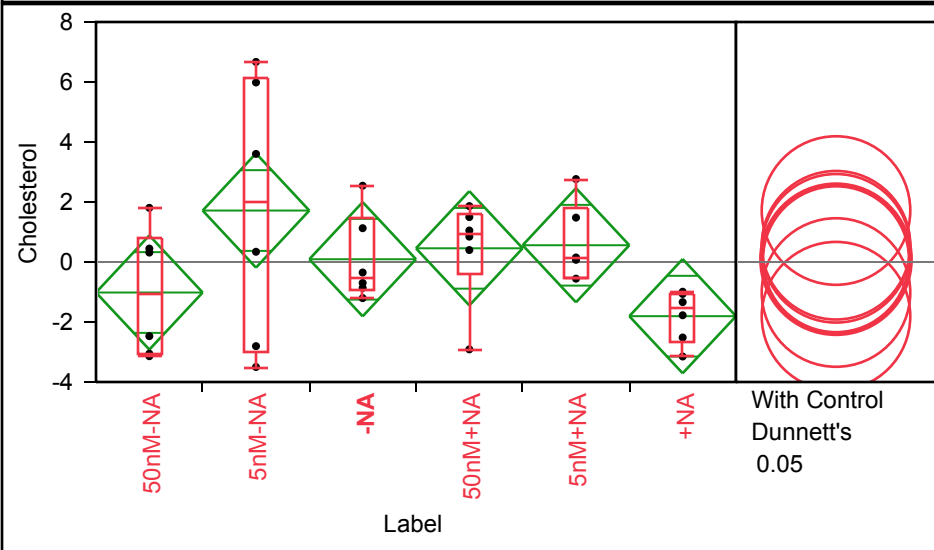

**Quantiles**

| Level   | Minimum  | 10%      | 25%      | Median   | 75%      | 90%      | Maximum  |
|---------|----------|----------|----------|----------|----------|----------|----------|
| 50nM-NA | -3.13935 | -3.13935 | -3.07751 | -1.07891 | 0.786302 | 1.804371 | 1.804371 |
| 5nM-NA  | -3.50086 | -3.50086 | -2.97892 | 1.971748 | 6.155661 | 6.670285 | 6.670285 |
| -NA     | -1.20372 | -1.20372 | -0.94841 | -0.52484 | 1.480737 | 2.542551 | 2.542551 |
| 50nM+NA | -2.91207 | -2.91207 | -0.429   | 0.947408 | 1.588432 | 1.863236 | 1.863236 |
| 5nM+NA  | -0.55707 | -0.55707 | -0.55635 | 0.111458 | 1.800672 | 2.764381 | 2.764381 |
| +NA     | -3.15003 | -3.15003 | -2.6756  | -1.55659 | -1.04664 | -0.9913  | -0.9913  |

**Oneway Anova**

**Summary of Fit**

|                            |          |
|----------------------------|----------|
| Rsquare                    | 0.229747 |
| Adj Rsquare                | 0.101371 |
| Root Mean Square Error     | 2.282374 |
| Mean of Response           | -2.8e-10 |
| Observations (or Sum Wgts) | 36       |

**Analysis of Variance**

| Source   | DF | Sum of Squares | Mean Square | F Ratio | Prob > F |
|----------|----|----------------|-------------|---------|----------|
| Label    | 5  | 46.61333       | 9.32267     | 1.7896  | 0.1452   |
| Error    | 30 | 156.27695      | 5.20923     |         |          |
| C. Total | 35 | 202.89028      |             |         |          |

**Means for Oneway Anova**

| Level   | Number | Mean    | Std Error | Lower 95% | Upper 95% |
|---------|--------|---------|-----------|-----------|-----------|
| 50nM-NA | 6      | -1.0171 | 0.93178   | -2.920    | 0.8858    |
| 5nM-NA  | 6      | 1.7153  | 0.93178   | -0.188    | 3.6183    |
| -NA     | 6      | 0.0921  | 0.93178   | -1.811    | 1.9950    |
| 50nM+NA | 6      | 0.4569  | 0.93178   | -1.446    | 2.3599    |
| 5nM+NA  | 6      | 0.5589  | 0.93178   | -1.344    | 2.4619    |
| +NA     | 6      | -1.8062 | 0.93178   | -3.709    | 0.0968    |

Std Error uses a pooled estimate of error variance

**Means Comparisons**

**Comparisons with a control using Dunnett's Method**

**Oneway Analysis of cholesteryl sulfate By Label**

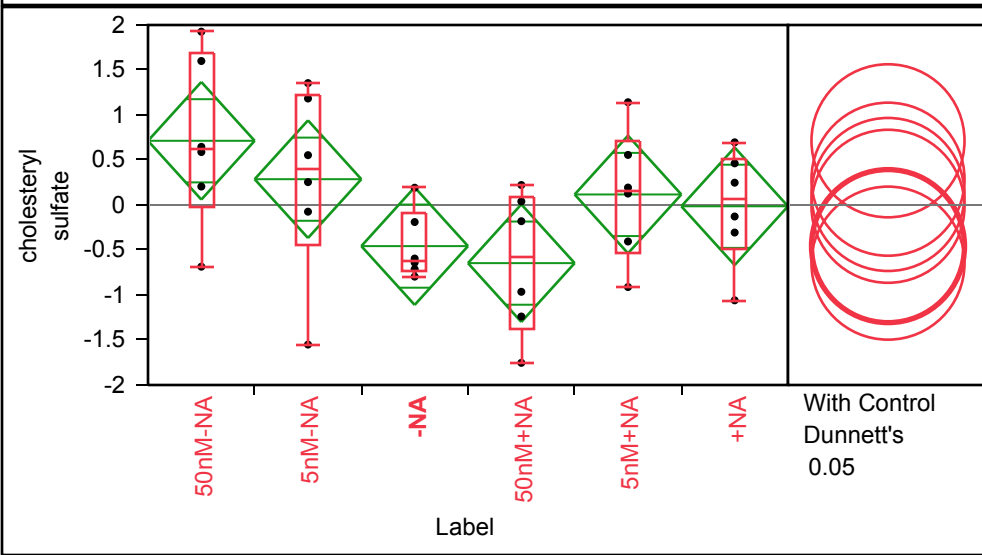

**Quantiles**

| Level   | Minimum  | 10%      | 25%      | Median   | 75%      | 90%      | Maximum  |
|---------|----------|----------|----------|----------|----------|----------|----------|
| 50nM-NA | -0.68527 | -0.68527 | -0.01745 | 0.617489 | 1.681301 | 1.925807 | 1.925807 |
| 5nM-NA  | -1.55072 | -1.55072 | -0.44348 | 0.404022 | 1.225982 | 1.354371 | 1.354371 |
| -NA     | -0.79585 | -0.79585 | -0.73314 | -0.61786 | -0.09404 | 0.191973 | 0.191973 |
| 50nM+NA | -1.75393 | -1.75393 | -1.36792 | -0.57224 | 0.085337 | 0.222183 | 0.222183 |
| 5nM+NA  | -0.91167 | -0.91167 | -0.53198 | 0.160353 | 0.702829 | 1.141863 | 1.141863 |
| +NA     | -1.05911 | -1.05911 | -0.49434 | 0.059999 | 0.521227 | 0.696385 | 0.696385 |

**Oneway Anova**

**Summary of Fit**

|                            |          |
|----------------------------|----------|
| Rsquare                    | 0.286089 |
| Adj Rsquare                | 0.167104 |
| Root Mean Square Error     | 0.783838 |
| Mean of Response           | -2.8e-10 |
| Observations (or Sum Wgts) | 36       |

**Analysis of Variance**

| Source   | DF | Sum of Squares | Mean Square | F Ratio | Prob > F |
|----------|----|----------------|-------------|---------|----------|
| Label    | 5  | 7.386376       | 1.47728     | 2.4044  | 0.0601   |
| Error    | 30 | 18.432074      | 0.61440     |         |          |
| C. Total | 35 | 25.818450      |             |         |          |

**Means for Oneway Anova**

| Level   | Number | Mean     | Std Error | Lower 95% | Upper 95% |
|---------|--------|----------|-----------|-----------|-----------|
| 50nM-NA | 6      | 0.71341  | 0.32000   | 0.060     | 1.3669    |
| 5nM-NA  | 6      | 0.28675  | 0.32000   | -0.367    | 0.9403    |
| -NA     | 6      | -0.45687 | 0.32000   | -1.110    | 0.1967    |
| 50nM+NA | 6      | -0.64596 | 0.32000   | -1.299    | 0.0076    |
| 5nM+NA  | 6      | 0.11700  | 0.32000   | -0.537    | 0.7705    |
| +NA     | 6      | -0.01433 | 0.32000   | -0.668    | 0.6392    |

Std Error uses a pooled estimate of error variance

**Means Comparisons**

**Comparisons with a control using Dunnett's Method**



**Oneway Analysis of choline By Label**

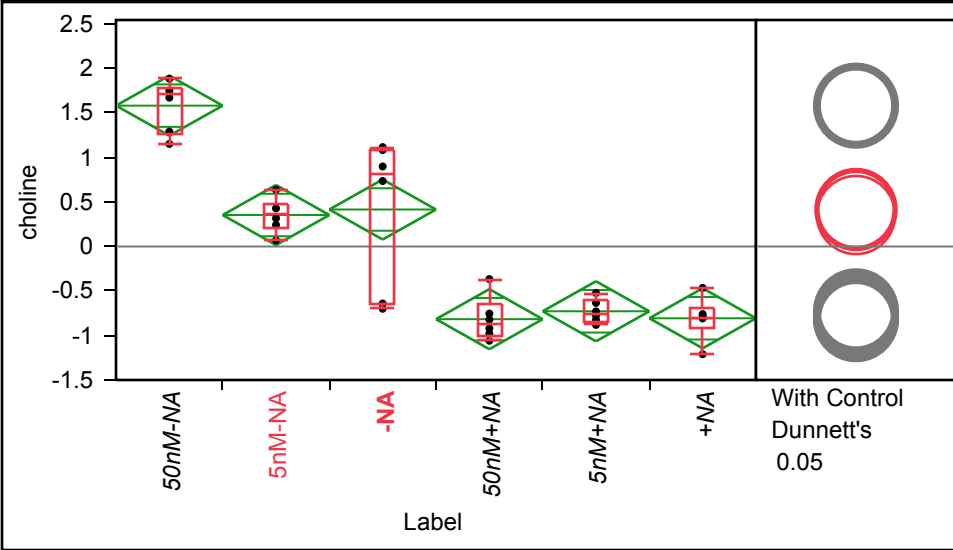

**Quantiles**

| Level   | Minimum  | 10%      | 25%      | Median   | 75%      | 90%      | Maximum  |
|---------|----------|----------|----------|----------|----------|----------|----------|
| 50nM-NA | 1.152442 | 1.152442 | 1.256047 | 1.707787 | 1.783786 | 1.884712 | 1.884712 |
| 5nM-NA  | 0.069399 | 0.069399 | 0.199319 | 0.37165  | 0.480433 | 0.637045 | 0.637045 |
| -NA     | -0.69928 | -0.69928 | -0.65573 | 0.817221 | 1.091129 | 1.115936 | 1.115936 |
| 50nM+NA | -1.05872 | -1.05872 | -0.99915 | -0.87084 | -0.65697 | -0.36627 | -0.36627 |
| 5nM+NA  | -0.88072 | -0.88072 | -0.83929 | -0.75276 | -0.60584 | -0.52273 | -0.52273 |
| +NA     | -1.2097  | -1.2097  | -0.91347 | -0.79484 | -0.68594 | -0.46539 | -0.46539 |

**Oneway Anova**

**Summary of Fit**

|                            |          |
|----------------------------|----------|
| Rsquare                    | 0.850268 |
| Adj Rsquare                | 0.825313 |
| Root Mean Square Error     | 0.404615 |
| Mean of Response           | -4.9e-17 |
| Observations (or Sum Wgts) | 36       |

**Analysis of Variance**

| Source   | DF | Sum of Squares | Mean Square | F Ratio | Prob > F |
|----------|----|----------------|-------------|---------|----------|
| Label    | 5  | 27.889957      | 5.57799     | 34.0717 | <.0001 * |
| Error    | 30 | 4.911400       | 0.16371     |         |          |
| C. Total | 35 | 32.801357      |             |         |          |

**Means for Oneway Anova**

| Level   | Number | Mean    | Std Error | Lower 95% | Upper 95% |
|---------|--------|---------|-----------|-----------|-----------|
| 50nM-NA | 6      | 1.5822  | 0.16518   | 1.245     | 1.920     |
| 5nM-NA  | 6      | 0.3534  | 0.16518   | 0.016     | 0.691     |
| -NA     | 6      | 0.4155  | 0.16518   | 0.078     | 0.753     |
| 50nM+NA | 6      | -0.8166 | 0.16518   | -1.154    | -0.479    |
| 5nM+NA  | 6      | -0.7280 | 0.16518   | -1.065    | -0.391    |
| +NA     | 6      | -0.8065 | 0.16518   | -1.144    | -0.469    |

Std Error uses a pooled estimate of error variance

**Means Comparisons**

**Comparisons with a control using Dunnett's Method**

**Oneway Analysis of Citric acid By Label**

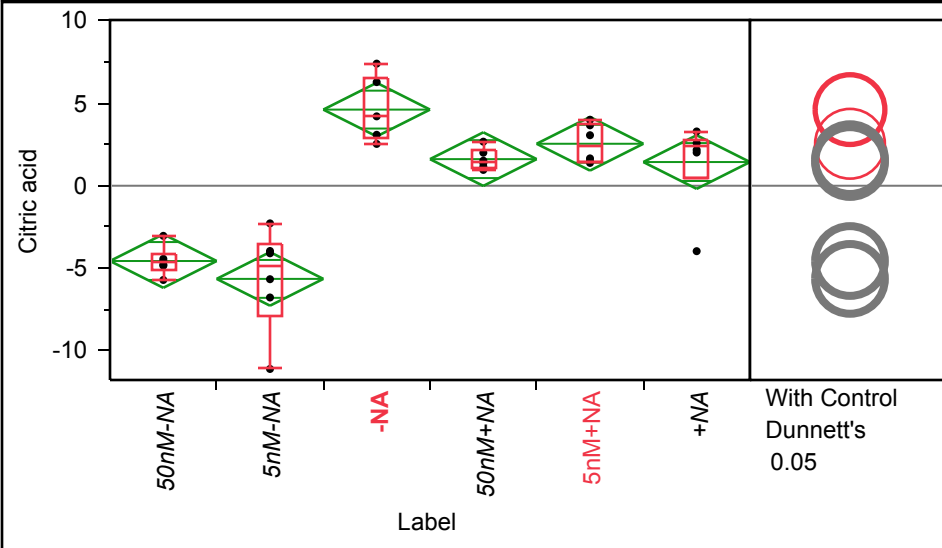

**Quantiles**

| Level   | Minimum  | 10%      | 25%      | Median   | 75%      | 90%      | Maximum  |
|---------|----------|----------|----------|----------|----------|----------|----------|
| 50nM-NA | -5.71717 | -5.71717 | -5.06998 | -4.67751 | -4.08585 | -3.04003 | -3.04003 |
| 5nM-NA  | -11.1162 | -11.1162 | -7.86419 | -4.88505 | -3.54019 | -2.28341 | -2.28341 |
| -NA     | 2.538062 | 2.538062 | 2.952211 | 4.196627 | 6.56697  | 7.408101 | 7.408101 |
| 50nM+NA | 0.960409 | 0.960409 | 1.106328 | 1.4476   | 2.170744 | 2.673071 | 2.673071 |
| 5nM+NA  | 1.384904 | 1.384904 | 1.471934 | 2.362255 | 3.751125 | 4.002758 | 4.002758 |
| +NA     | -3.97016 | -3.97016 | 0.518535 | 2.350975 | 2.763634 | 3.292468 | 3.292468 |

**Oneway Anova**

**Summary of Fit**

|                            |          |
|----------------------------|----------|
| Rsquare                    | 0.817739 |
| Adj Rsquare                | 0.787362 |
| Root Mean Square Error     | 1.949902 |
| Mean of Response           | 2.778e-9 |
| Observations (or Sum Wgts) | 36       |

**Analysis of Variance**

| Source   | DF | Sum of Squares | Mean Square | F Ratio | Prob > F |
|----------|----|----------------|-------------|---------|----------|
| Label    | 5  | 511.76104      | 102.352     | 26.9198 | <.0001 * |
| Error    | 30 | 114.06349      | 3.802       |         |          |
| C. Total | 35 | 625.82453      |             |         |          |

**Means for Oneway Anova**

| Level   | Number | Mean    | Std Error | Lower 95% | Upper 95% |
|---------|--------|---------|-----------|-----------|-----------|
| 50nM-NA | 6      | -4.5668 | 0.79604   | -6.193    | -2.941    |
| 5nM-NA  | 6      | -5.6515 | 0.79604   | -7.277    | -4.026    |
| -NA     | 6      | 4.6194  | 0.79604   | 2.994     | 6.245     |
| 50nM+NA | 6      | 1.6145  | 0.79604   | -0.011    | 3.240     |
| 5nM+NA  | 6      | 2.5467  | 0.79604   | 0.921     | 4.172     |
| +NA     | 6      | 1.4377  | 0.79604   | -0.188    | 3.063     |

Std Error uses a pooled estimate of error variance

**Means Comparisons**

**Comparisons with a control using Dunnett's Method**

**Oneway Analysis of citrulline By Label**

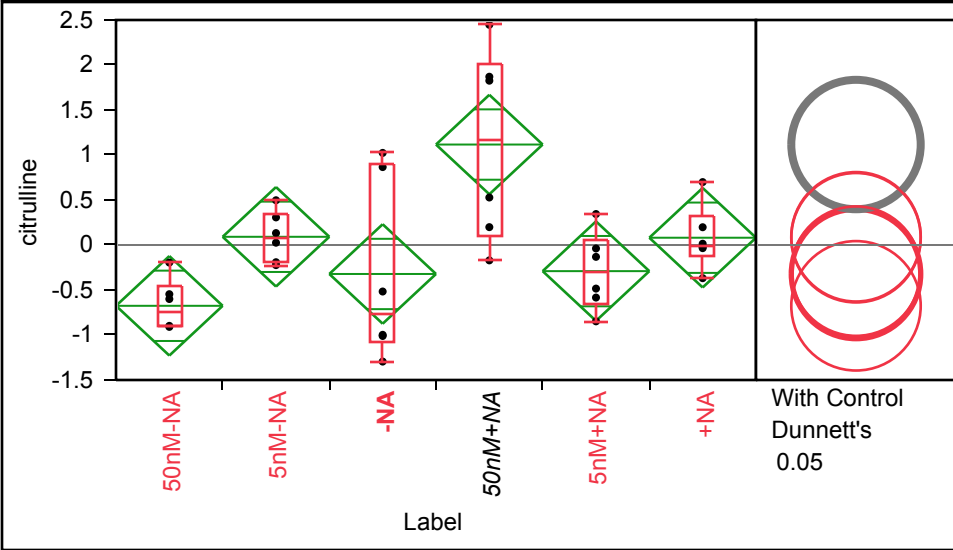

**Quantiles**

| Level   | Minimum  | 10%      | 25%      | Median   | 75%      | 90%      | Maximum  |
|---------|----------|----------|----------|----------|----------|----------|----------|
| 50nM-NA | -0.90986 | -0.90986 | -0.90518 | -0.74935 | -0.45876 | -0.19519 | -0.19519 |
| 5nM-NA  | -0.22348 | -0.22348 | -0.19939 | 0.078916 | 0.354267 | 0.497012 | 0.497012 |
| -NA     | -1.29531 | -1.29531 | -1.08198 | -0.75746 | 0.905208 | 1.023297 | 1.023297 |
| 50nM+NA | -0.17078 | -0.17078 | 0.106103 | 1.176679 | 2.013871 | 2.446711 | 2.446711 |
| 5nM+NA  | -0.84803 | -0.84803 | -0.65009 | -0.30798 | 0.057118 | 0.343922 | 0.343922 |
| +NA     | -0.36866 | -0.36866 | -0.1184  | -0.00403 | 0.322802 | 0.698915 | 0.698915 |

**Oneway Anova**

**Summary of Fit**

|                            |          |
|----------------------------|----------|
| Rsquare                    | 0.464457 |
| Adj Rsquare                | 0.3752   |
| Root Mean Square Error     | 0.662862 |
| Mean of Response           | -8.3e-10 |
| Observations (or Sum Wgts) | 36       |

**Analysis of Variance**

| Source   | DF | Sum of Squares | Mean Square | F Ratio | Prob > F |
|----------|----|----------------|-------------|---------|----------|
| Label    | 5  | 11.431912      | 2.28638     | 5.2036  | 0.0015 * |
| Error    | 30 | 13.181593      | 0.43939     |         |          |
| C. Total | 35 | 24.613505      |             |         |          |

**Means for Oneway Anova**

| Level   | Number | Mean    | Std Error | Lower 95% | Upper 95% |
|---------|--------|---------|-----------|-----------|-----------|
| 50nM-NA | 6      | -0.6757 | 0.27061   | -1.228    | -0.123    |
| 5nM-NA  | 6      | 0.0911  | 0.27061   | -0.462    | 0.644     |
| -NA     | 6      | -0.3220 | 0.27061   | -0.875    | 0.231     |
| 50nM+NA | 6      | 1.1162  | 0.27061   | 0.564     | 1.669     |
| 5nM+NA  | 6      | -0.2904 | 0.27061   | -0.843    | 0.262     |
| +NA     | 6      | 0.0808  | 0.27061   | -0.472    | 0.633     |

Std Error uses a pooled estimate of error variance

**Means Comparisons**

**Comparisons with a control using Dunnett's Method**

**Oneway Analysis of CMP By Label**

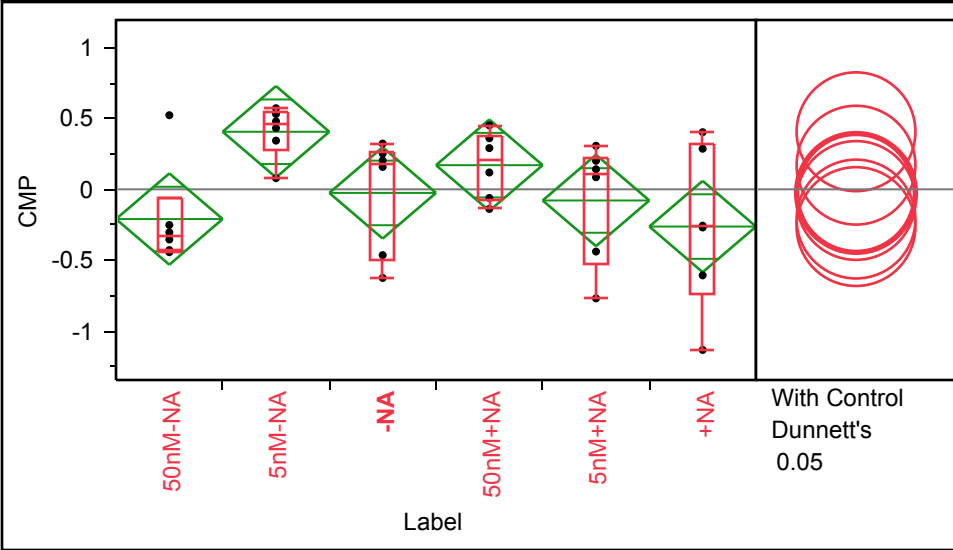

**Quantiles**

| Level   | Minimum  | 10%      | 25%      | Median   | 75%      | 90%      | Maximum  |
|---------|----------|----------|----------|----------|----------|----------|----------|
| 50nM-NA | -0.44336 | -0.44336 | -0.4324  | -0.32869 | -0.05787 | 0.522832 | 0.522832 |
| 5nM-NA  | 0.078505 | 0.078505 | 0.277245 | 0.455541 | 0.54168  | 0.57196  | 0.57196  |
| -NA     | -0.62498 | -0.62498 | -0.50438 | 0.180933 | 0.269818 | 0.322696 | 0.322696 |
| 50nM+NA | -0.13822 | -0.13822 | -0.08006 | 0.204821 | 0.382974 | 0.451212 | 0.451212 |
| 5nM+NA  | -0.76892 | -0.76892 | -0.52134 | 0.113627 | 0.227635 | 0.307017 | 0.307017 |
| +NA     | -1.13277 | -1.13277 | -0.73844 | -0.26281 | 0.315586 | 0.402851 | 0.402851 |

**Oneway Anova**

**Summary of Fit**

|                            |          |
|----------------------------|----------|
| Rsquare                    | 0.296009 |
| Adj Rsquare                | 0.178678 |
| Root Mean Square Error     | 0.386311 |
| Mean of Response           | 6.17e-18 |
| Observations (or Sum Wgts) | 36       |

**Analysis of Variance**

| Source   | DF | Sum of Squares | Mean Square | F Ratio | Prob > F |
|----------|----|----------------|-------------|---------|----------|
| Label    | 5  | 1.8824914      | 0.376498    | 2.5228  | 0.0508   |
| Error    | 30 | 4.4770746      | 0.149236    |         |          |
| C. Total | 35 | 6.3595660      |             |         |          |

**Means for Oneway Anova**

| Level   | Number | Mean     | Std Error | Lower 95% | Upper 95% |
|---------|--------|----------|-----------|-----------|-----------|
| 50nM-NA | 6      | -0.20968 | 0.15771   | -0.5318   | 0.11241   |
| 5nM-NA  | 6      | 0.40610  | 0.15771   | 0.0840    | 0.72819   |
| -NA     | 6      | -0.02540 | 0.15771   | -0.3475   | 0.29669   |
| 50nM+NA | 6      | 0.17036  | 0.15771   | -0.1517   | 0.49245   |
| 5nM+NA  | 6      | -0.07871 | 0.15771   | -0.4008   | 0.24337   |
| +NA     | 6      | -0.26267 | 0.15771   | -0.5848   | 0.05942   |

Std Error uses a pooled estimate of error variance

**Means Comparisons**

**Comparisons with a control using Dunnett's Method**

**Oneway Analysis of CMP-N-acetylneuraminic acid By Label**

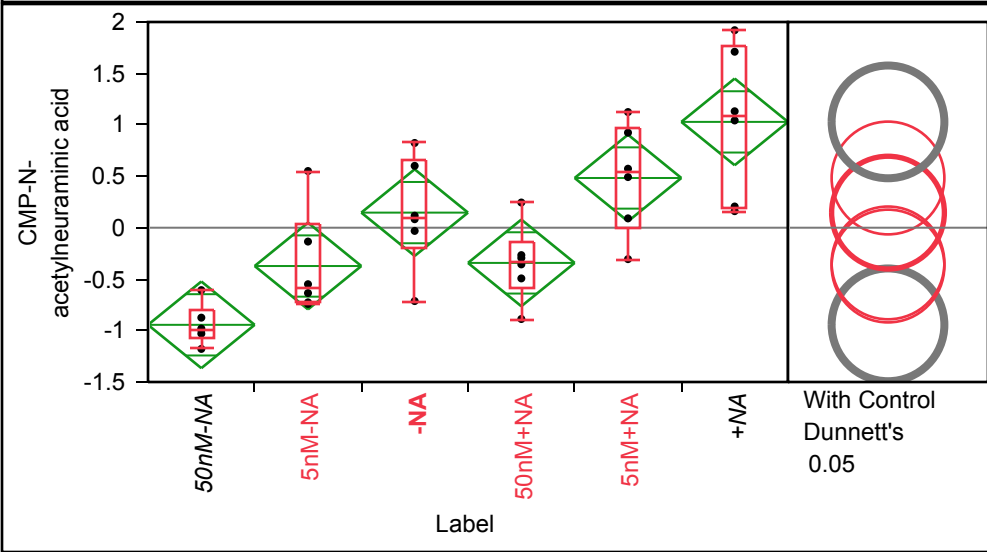

**Quantiles**

| Level   | Minimum  | 10%      | 25%      | Median   | 75%      | 90%      | Maximum  |
|---------|----------|----------|----------|----------|----------|----------|----------|
| 50nM-NA | -1.17831 | -1.17831 | -1.06693 | -0.98796 | -0.80756 | -0.60682 | -0.60682 |
| 5nM-NA  | -0.74113 | -0.74113 | -0.72949 | -0.59233 | 0.036708 | 0.551158 | 0.551158 |
| -NA     | -0.71312 | -0.71312 | -0.20157 | 0.099652 | 0.657117 | 0.823907 | 0.823907 |
| 50nM+NA | -0.88769 | -0.88769 | -0.59159 | -0.32557 | -0.13863 | 0.244819 | 0.244819 |
| 5nM+NA  | -0.30541 | -0.30541 | -0.00814 | 0.532928 | 0.974414 | 1.12443  | 1.12443  |
| +NA     | 0.161075 | 0.161075 | 0.194851 | 1.087396 | 1.763168 | 1.920053 | 1.920053 |

**Oneway Anova**

**Summary of Fit**

|                            |          |
|----------------------------|----------|
| Rsquare                    | 0.658446 |
| Adj Rsquare                | 0.60152  |
| Root Mean Square Error     | 0.505298 |
| Mean of Response           | -2.8e-10 |
| Observations (or Sum Wgts) | 36       |

**Analysis of Variance**

| Source   | DF | Sum of Squares | Mean Square | F Ratio | Prob > F |
|----------|----|----------------|-------------|---------|----------|
| Label    | 5  | 14.766482      | 2.95330     | 11.5668 | <.0001 * |
| Error    | 30 | 7.659789       | 0.25533     |         |          |
| C. Total | 35 | 22.426271      |             |         |          |

**Means for Oneway Anova**

| Level   | Number | Mean    | Std Error | Lower 95% | Upper 95% |
|---------|--------|---------|-----------|-----------|-----------|
| 50nM-NA | 6      | -0.9442 | 0.20629   | -1.366    | -0.523    |
| 5nM-NA  | 6      | -0.3725 | 0.20629   | -0.794    | 0.049     |
| -NA     | 6      | 0.1468  | 0.20629   | -0.275    | 0.568     |
| 50nM+NA | 6      | -0.3422 | 0.20629   | -0.764    | 0.079     |
| 5nM+NA  | 6      | 0.4834  | 0.20629   | 0.062     | 0.905     |
| +NA     | 6      | 1.0288  | 0.20629   | 0.608     | 1.450     |

Std Error uses a pooled estimate of error variance

**Means Comparisons**

**Comparisons with a control using Dunnnett's Method**

**Oneway Analysis of creatine By Label**

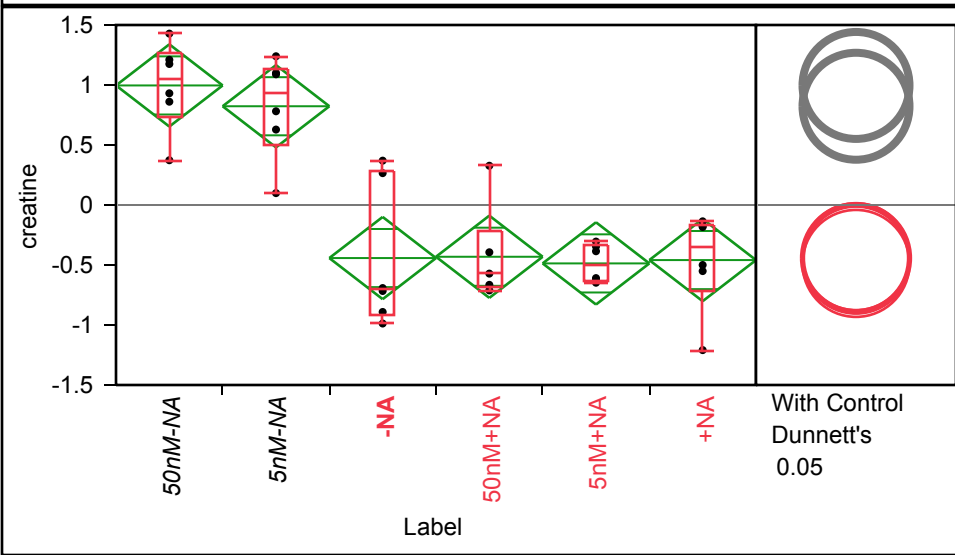

**Quantiles**

| Level   | Minimum  | 10%      | 25%      | Median   | 75%      | 90%      | Maximum  |
|---------|----------|----------|----------|----------|----------|----------|----------|
| 50nM-NA | 0.372953 | 0.372953 | 0.738812 | 1.052888 | 1.264776 | 1.428074 | 1.428074 |
| 5nM-NA  | 0.099008 | 0.099008 | 0.496172 | 0.935113 | 1.134949 | 1.239472 | 1.239472 |
| -NA     | -0.98767 | -0.98767 | -0.91552 | -0.70439 | 0.291499 | 0.369515 | 0.369515 |
| 50nM+NA | -0.71178 | -0.71178 | -0.67692 | -0.57204 | -0.21376 | 0.327054 | 0.327054 |
| 5nM+NA  | -0.6476  | -0.6476  | -0.63287 | -0.49729 | -0.33524 | -0.30488 | -0.30488 |
| +NA     | -1.20921 | -1.20921 | -0.7153  | -0.34167 | -0.16488 | -0.13618 | -0.13618 |

**Oneway Anova**

**Summary of Fit**

|                            |          |
|----------------------------|----------|
| Rsquare                    | 0.747494 |
| Adj Rsquare                | 0.70541  |
| Root Mean Square Error     | 0.410889 |
| Mean of Response           | -2.8e-10 |
| Observations (or Sum Wgts) | 36       |

**Analysis of Variance**

| Source   | DF | Sum of Squares | Mean Square | F Ratio | Prob > F |
|----------|----|----------------|-------------|---------|----------|
| Label    | 5  | 14.993634      | 2.99873     | 17.7618 | <.0001 * |
| Error    | 30 | 5.064899       | 0.16883     |         |          |
| C. Total | 35 | 20.058533      |             |         |          |

**Means for Oneway Anova**

| Level   | Number | Mean     | Std Error | Lower 95% | Upper 95% |
|---------|--------|----------|-----------|-----------|-----------|
| 50nM-NA | 6      | 0.99632  | 0.16774   | 0.6537    | 1.339     |
| 5nM-NA  | 6      | 0.82290  | 0.16774   | 0.4803    | 1.165     |
| -NA     | 6      | -0.44215 | 0.16774   | -0.7847   | -0.100    |
| 50nM+NA | 6      | -0.43136 | 0.16774   | -0.7739   | -0.089    |
| 5nM+NA  | 6      | -0.48673 | 0.16774   | -0.8293   | -0.144    |
| +NA     | 6      | -0.45897 | 0.16774   | -0.8016   | -0.116    |

Std Error uses a pooled estimate of error variance

**Means Comparisons**

**Comparisons with a control using Dunnnett's Method**

**Oneway Analysis of Creatinine By Label**

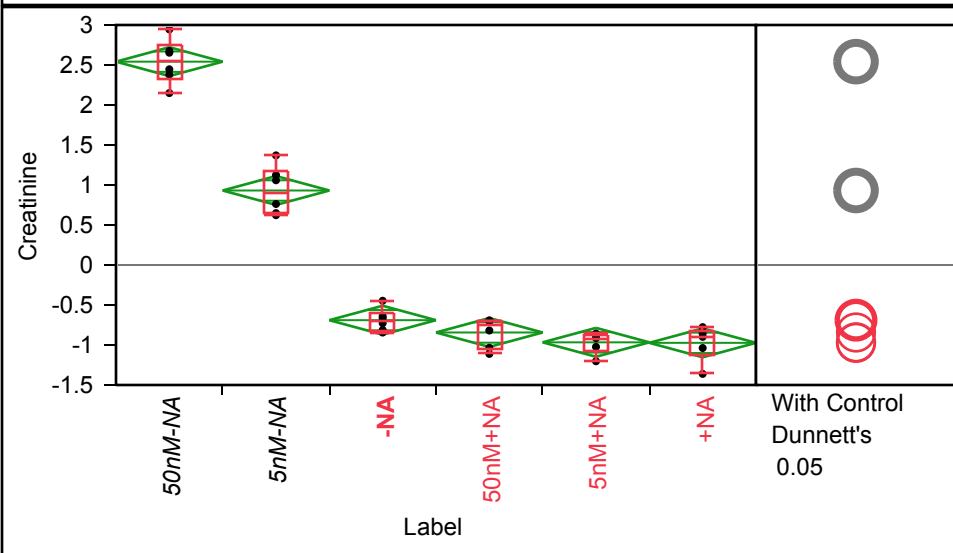

**Quantiles**

| Level   | Minimum  | 10%      | 25%      | Median   | 75%      | 90%      | Maximum  |
|---------|----------|----------|----------|----------|----------|----------|----------|
| 50nM-NA | 2.149003 | 2.149003 | 2.322406 | 2.549877 | 2.743573 | 2.944872 | 2.944872 |
| 5nM-NA  | 0.623025 | 0.623025 | 0.641936 | 0.910877 | 1.185674 | 1.369927 | 1.369927 |
| -NA     | -0.84424 | -0.84424 | -0.82052 | -0.69685 | -0.59257 | -0.44716 | -0.44716 |
| 50nM+NA | -1.11127 | -1.11127 | -1.05337 | -0.7623  | -0.69769 | -0.6918  | -0.6918  |
| 5nM+NA  | -1.2029  | -1.2029  | -1.06795 | -0.91906 | -0.87312 | -0.85722 | -0.85722 |
| +NA     | -1.36118 | -1.36118 | -1.11865 | -0.9037  | -0.83506 | -0.77686 | -0.77686 |

**Oneway Anova**

**Summary of Fit**

|                            |          |
|----------------------------|----------|
| Rsquare                    | 0.977955 |
| Adj Rsquare                | 0.974281 |
| Root Mean Square Error     | 0.21649  |
| Mean of Response           | 0        |
| Observations (or Sum Wgts) | 36       |

**Analysis of Variance**

| Source   | DF | Sum of Squares | Mean Square | F Ratio  | Prob > F |
|----------|----|----------------|-------------|----------|----------|
| Label    | 5  | 62.375091      | 12.4750     | 266.1742 | <.0001 * |
| Error    | 30 | 1.406036       | 0.0469      |          |          |
| C. Total | 35 | 63.781127      |             |          |          |

**Means for Oneway Anova**

| Level   | Number | Mean    | Std Error | Lower 95% | Upper 95% |
|---------|--------|---------|-----------|-----------|-----------|
| 50nM-NA | 6      | 2.5417  | 0.08838   | 2.361     | 2.722     |
| 5nM-NA  | 6      | 0.9312  | 0.08838   | 0.751     | 1.112     |
| -NA     | 6      | -0.6898 | 0.08838   | -0.870    | -0.509    |
| 50nM+NA | 6      | -0.8436 | 0.08838   | -1.024    | -0.663    |
| 5nM+NA  | 6      | -0.9666 | 0.08838   | -1.147    | -0.786    |
| +NA     | 6      | -0.9730 | 0.08838   | -1.153    | -0.792    |

Std Error uses a pooled estimate of error variance

**Means Comparisons**

**Comparisons with a control using Dunnett's Method**

**Oneway Analysis of Cyclic ADP-ribose By Label**

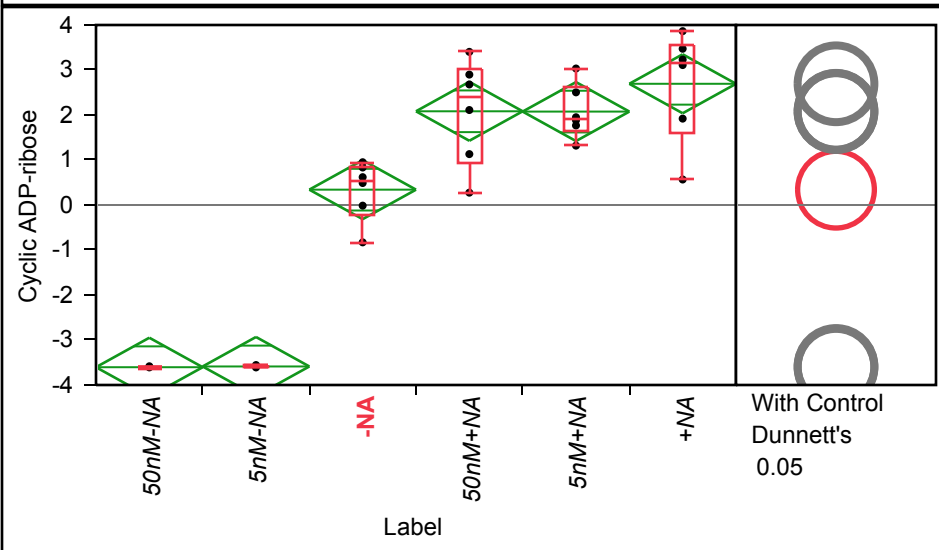

**Quantiles**

| Level   | Minimum  | 10%      | 25%      | Median   | 75%      | 90%      | Maximum  |
|---------|----------|----------|----------|----------|----------|----------|----------|
| 50nM-NA | -3.62967 | -3.62967 | -3.61519 | -3.6051  | -3.59169 | -3.58421 | -3.58421 |
| 5nM-NA  | -3.60934 | -3.60934 | -3.60321 | -3.59017 | -3.57512 | -3.55673 | -3.55673 |
| -NA     | -0.83012 | -0.83012 | -0.21837 | 0.553417 | 0.862362 | 0.950427 | 0.950427 |
| 50nM+NA | 0.274608 | 0.274608 | 0.916792 | 2.394458 | 3.024057 | 3.403034 | 3.403034 |
| 5nM+NA  | 1.319347 | 1.319347 | 1.655421 | 1.916125 | 2.635789 | 3.03296  | 3.03296  |
| +NA     | 0.566487 | 0.566487 | 1.581244 | 3.1702   | 3.56968  | 3.862899 | 3.862899 |

**Oneway Anova**

**Summary of Fit**

|                            |          |
|----------------------------|----------|
| Rsquare                    | 0.931334 |
| Adj Rsquare                | 0.919889 |
| Root Mean Square Error     | 0.785911 |
| Mean of Response           | -2.8e-10 |
| Observations (or Sum Wgts) | 36       |

**Analysis of Variance**

| Source   | DF | Sum of Squares | Mean Square | F Ratio | Prob > F |
|----------|----|----------------|-------------|---------|----------|
| Label    | 5  | 251.32062      | 50.2641     | 81.3789 | <.0001 * |
| Error    | 30 | 18.52967       | 0.6177      |         |          |
| C. Total | 35 | 269.85029      |             |         |          |

**Means for Oneway Anova**

| Level   | Number | Mean    | Std Error | Lower 95% | Upper 95% |
|---------|--------|---------|-----------|-----------|-----------|
| 50nM-NA | 6      | -3.6048 | 0.32085   | -4.260    | -2.950    |
| 5nM-NA  | 6      | -3.5881 | 0.32085   | -4.243    | -2.933    |
| -NA     | 6      | 0.3409  | 0.32085   | -0.314    | 0.996     |
| 50nM+NA | 6      | 2.0825  | 0.32085   | 1.427     | 2.738     |
| 5nM+NA  | 6      | 2.0759  | 0.32085   | 1.421     | 2.731     |
| +NA     | 6      | 2.6935  | 0.32085   | 2.038     | 3.349     |

Std Error uses a pooled estimate of error variance

**Means Comparisons**

**Comparisons with a control using Dunnett's Method**



**Oneway Analysis of cyclic-AMP By Label**

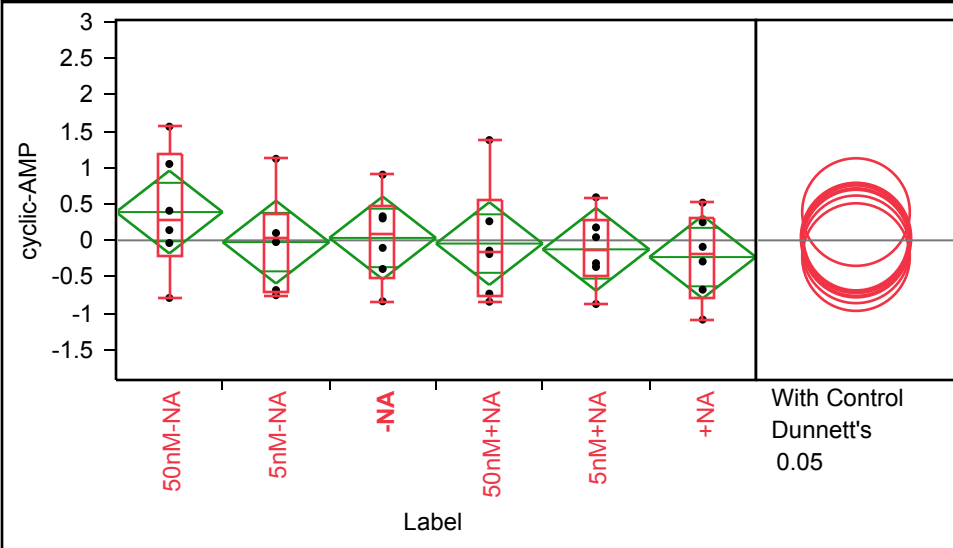

**Quantiles**

| Level   | Minimum  | 10%      | 25%      | Median   | 75%      | 90%      | Maximum  |
|---------|----------|----------|----------|----------|----------|----------|----------|
| 50nM-NA | -0.7924  | -0.7924  | -0.22546 | 0.274079 | 1.179531 | 1.56446  | 1.56446  |
| 5nM-NA  | -0.75475 | -0.75475 | -0.70167 | 0.035191 | 0.356083 | 1.12194  | 1.12194  |
| -NA     | -0.83846 | -0.83846 | -0.50483 | 0.099028 | 0.474284 | 0.903911 | 0.903911 |
| 50nM+NA | -0.84435 | -0.84435 | -0.76106 | -0.16485 | 0.541787 | 1.379563 | 1.379563 |
| 5nM+NA  | -0.87621 | -0.87621 | -0.49364 | -0.13576 | 0.281597 | 0.592479 | 0.592479 |
| +NA     | -1.09056 | -1.09056 | -0.78156 | -0.19008 | 0.316559 | 0.518319 | 0.518319 |

**Oneway Anova**

**Summary of Fit**

|                            |          |
|----------------------------|----------|
| Rsquare                    | 0.087609 |
| Adj Rsquare                | -0.06446 |
| Root Mean Square Error     | 0.682273 |
| Mean of Response           | -5.6e-10 |
| Observations (or Sum Wgts) | 36       |

**Analysis of Variance**

| Source   | DF | Sum of Squares | Mean Square | F Ratio | Prob > F |
|----------|----|----------------|-------------|---------|----------|
| Label    | 5  | 1.340929       | 0.268186    | 0.5761  | 0.7178   |
| Error    | 30 | 13.964901      | 0.465497    |         |          |
| C. Total | 35 | 15.305829      |             |         |          |

**Means for Oneway Anova**

| Level   | Number | Mean     | Std Error | Lower 95% | Upper 95% |
|---------|--------|----------|-----------|-----------|-----------|
| 50nM-NA | 6      | 0.38916  | 0.27854   | -0.1797   | 0.95801   |
| 5nM-NA  | 6      | -0.02427 | 0.27854   | -0.5931   | 0.54458   |
| -NA     | 6      | 0.03349  | 0.27854   | -0.5354   | 0.60234   |
| 50nM+NA | 6      | -0.04421 | 0.27854   | -0.6131   | 0.52464   |
| 5nM+NA  | 6      | -0.12390 | 0.27854   | -0.6927   | 0.44495   |
| +NA     | 6      | -0.23028 | 0.27854   | -0.7991   | 0.33857   |

Std Error uses a pooled estimate of error variance

**Means Comparisons**

**Comparisons with a control using Dunnett's Method**

**Oneway Analysis of cystathionine By Label**

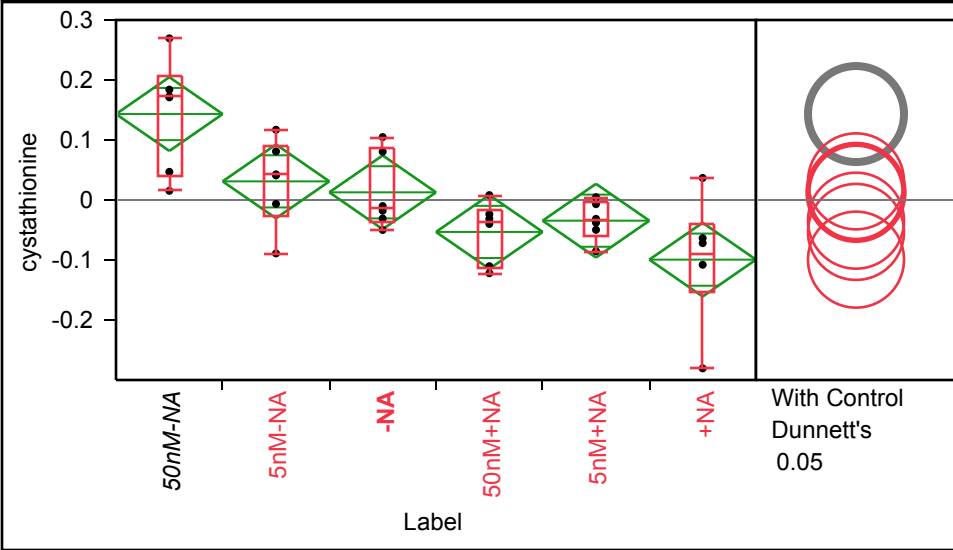

**Quantiles**

| Level   | Minimum  | 10%      | 25%      | Median   | 75%      | 90%      | Maximum  |
|---------|----------|----------|----------|----------|----------|----------|----------|
| 50nM-NA | 0.015326 | 0.015326 | 0.039014 | 0.171939 | 0.205333 | 0.269409 | 0.269409 |
| 5nM-NA  | -0.08896 | -0.08896 | -0.02711 | 0.041859 | 0.089989 | 0.117062 | 0.117062 |
| -NA     | -0.04988 | -0.04988 | -0.03557 | -0.01395 | 0.086577 | 0.104832 | 0.104832 |
| 50nM+NA | -0.12203 | -0.12203 | -0.11327 | -0.03569 | -0.01575 | 0.008136 | 0.008136 |
| 5nM+NA  | -0.0854  | -0.0854  | -0.05867 | -0.03467 | -0.00402 | 0.004678 | 0.004678 |
| +NA     | -0.28061 | -0.28061 | -0.15206 | -0.08989 | -0.03851 | 0.036737 | 0.036737 |

**Oneway Anova**

**Summary of Fit**

|                            |          |
|----------------------------|----------|
| Rsquare                    | 0.566611 |
| Adj Rsquare                | 0.494379 |
| Root Mean Square Error     | 0.073745 |
| Mean of Response           | 3.08e-18 |
| Observations (or Sum Wgts) | 36       |

**Analysis of Variance**

| Source   | DF | Sum of Squares | Mean Square | F Ratio | Prob > F |
|----------|----|----------------|-------------|---------|----------|
| Label    | 5  | 0.21330145     | 0.042660    | 7.8444  | <.0001 * |
| Error    | 30 | 0.16315007     | 0.005438    |         |          |
| C. Total | 35 | 0.37645152     |             |         |          |

**Means for Oneway Anova**

| Level   | Number | Mean     | Std Error | Lower 95% | Upper 95% |
|---------|--------|----------|-----------|-----------|-----------|
| 50nM-NA | 6      | 0.14325  | 0.03011   | 0.0818    | 0.2047    |
| 5nM-NA  | 6      | 0.03105  | 0.03011   | -0.0304   | 0.0925    |
| -NA     | 6      | 0.01279  | 0.03011   | -0.0487   | 0.0743    |
| 50nM+NA | 6      | -0.05322 | 0.03011   | -0.1147   | 0.0083    |
| 5nM+NA  | 6      | -0.03446 | 0.03011   | -0.0959   | 0.0270    |
| +NA     | 6      | -0.09941 | 0.03011   | -0.1609   | -0.0379   |

Std Error uses a pooled estimate of error variance

**Means Comparisons**

**Comparisons with a control using Dunnett's Method**

**Oneway Analysis of Cysteineglutathione disulfide By Label**

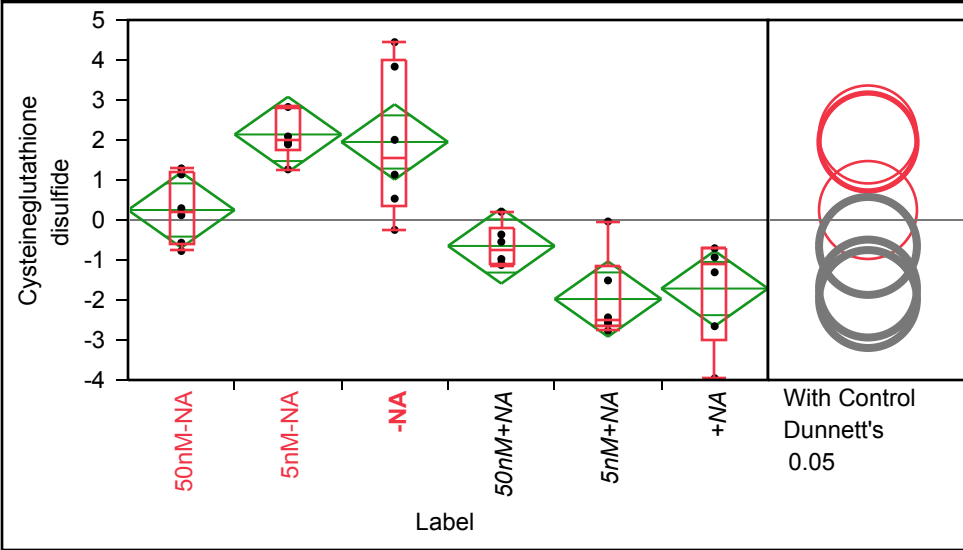

**Quantiles**

| Level   | Minimum  | 10%      | 25%      | Median   | 75%      | 90%      | Maximum  |
|---------|----------|----------|----------|----------|----------|----------|----------|
| 50nM-NA | -0.77489 | -0.77489 | -0.61994 | 0.206601 | 1.176197 | 1.289853 | 1.289853 |
| 5nM-NA  | 1.265815 | 1.265815 | 1.734166 | 2.017103 | 2.816797 | 2.825021 | 2.825021 |
| -NA     | -0.24753 | -0.24753 | 0.338674 | 1.568538 | 3.987306 | 4.445479 | 4.445479 |
| 50nM+NA | -1.12537 | -1.12537 | -1.09568 | -0.7608  | -0.22153 | 0.204056 | 0.204056 |
| 5nM+NA  | -2.76485 | -2.76485 | -2.62585 | -2.48188 | -1.14272 | -0.03686 | -0.03686 |
| +NA     | -3.95614 | -3.95614 | -2.98058 | -1.12086 | -0.71881 | -0.70678 | -0.70678 |

**Oneway Anova**

**Summary of Fit**

|                            |          |
|----------------------------|----------|
| Rsquare                    | 0.711562 |
| Adj Rsquare                | 0.663489 |
| Root Mean Square Error     | 1.128267 |
| Mean of Response           | -5.6e-10 |
| Observations (or Sum Wgts) | 36       |

**Analysis of Variance**

| Source   | DF | Sum of Squares | Mean Square | F Ratio | Prob > F |
|----------|----|----------------|-------------|---------|----------|
| Label    | 5  | 94.21189       | 18.8424     | 14.8017 | <.0001 * |
| Error    | 30 | 38.18959       | 1.2730      |         |          |
| C. Total | 35 | 132.40148      |             |         |          |

**Means for Oneway Anova**

| Level   | Number | Mean    | Std Error | Lower 95% | Upper 95% |
|---------|--------|---------|-----------|-----------|-----------|
| 50nM-NA | 6      | 0.2497  | 0.46061   | -0.691    | 1.190     |
| 5nM-NA  | 6      | 2.1382  | 0.46061   | 1.198     | 3.079     |
| -NA     | 6      | 1.9506  | 0.46061   | 1.010     | 2.891     |
| 50nM+NA | 6      | -0.6487 | 0.46061   | -1.589    | 0.292     |
| 5nM+NA  | 6      | -1.9761 | 0.46061   | -2.917    | -1.035    |
| +NA     | 6      | -1.7138 | 0.46061   | -2.655    | -0.773    |

Std Error uses a pooled estimate of error variance

**Means Comparisons**

**Comparisons with a control using Dunnett's Method**

**Oneway Analysis of Cystine By Label**

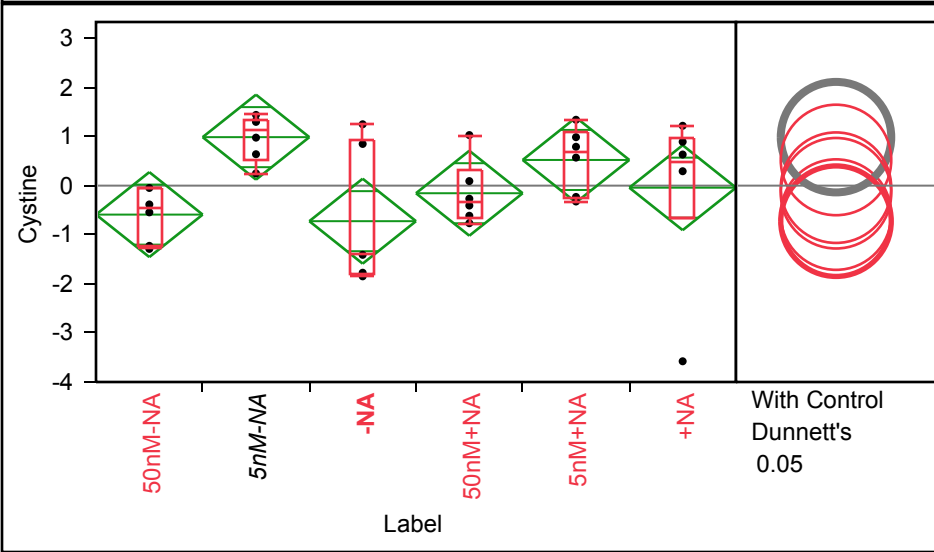

**Quantiles**

| Level   | Minimum  | 10%      | 25%      | Median   | 75%      | 90%      | Maximum  |
|---------|----------|----------|----------|----------|----------|----------|----------|
| 50nM-NA | -1.28865 | -1.28865 | -1.24226 | -0.46368 | -0.04934 | -0.04735 | -0.04735 |
| 5nM-NA  | 0.249069 | 0.249069 | 0.542096 | 1.138155 | 1.350061 | 1.440672 | 1.440672 |
| -NA     | -1.84747 | -1.84747 | -1.79258 | -1.41105 | 0.949596 | 1.249834 | 1.249834 |
| 50nM+NA | -0.76535 | -0.76535 | -0.65144 | -0.33599 | 0.32668  | 1.029773 | 1.029773 |
| 5nM+NA  | -0.32295 | -0.32295 | -0.25338 | 0.681295 | 1.075681 | 1.341417 | 1.341417 |
| +NA     | -3.578   | -3.578   | -0.67831 | 0.463627 | 0.974654 | 1.219046 | 1.219046 |

**Oneway Anova**

**Summary of Fit**

|                            |          |
|----------------------------|----------|
| Rsquare                    | 0.285138 |
| Adj Rsquare                | 0.165994 |
| Root Mean Square Error     | 1.037571 |
| Mean of Response           | 5.56e-10 |
| Observations (or Sum Wgts) | 36       |

**Analysis of Variance**

| Source   | DF | Sum of Squares | Mean Square | F Ratio | Prob > F |
|----------|----|----------------|-------------|---------|----------|
| Label    | 5  | 12.882190      | 2.57644     | 2.3932  | 0.0611   |
| Error    | 30 | 32.296599      | 1.07655     |         |          |
| C. Total | 35 | 45.178788      |             |         |          |

**Means for Oneway Anova**

| Level   | Number | Mean     | Std Error | Lower 95% | Upper 95% |
|---------|--------|----------|-----------|-----------|-----------|
| 50nM-NA | 6      | -0.59003 | 0.42359   | -1.455    | 0.2751    |
| 5nM-NA  | 6      | 0.98761  | 0.42359   | 0.123     | 1.8527    |
| -NA     | 6      | -0.72408 | 0.42359   | -1.589    | 0.1410    |
| 50nM+NA | 6      | -0.15479 | 0.42359   | -1.020    | 0.7103    |
| 5nM+NA  | 6      | 0.52299  | 0.42359   | -0.342    | 1.3881    |
| +NA     | 6      | -0.04171 | 0.42359   | -0.907    | 0.8234    |

Std Error uses a pooled estimate of error variance

**Means Comparisons**

**Comparisons with a control using Dunnett's Method**

**Oneway Analysis of cytidine By Label**

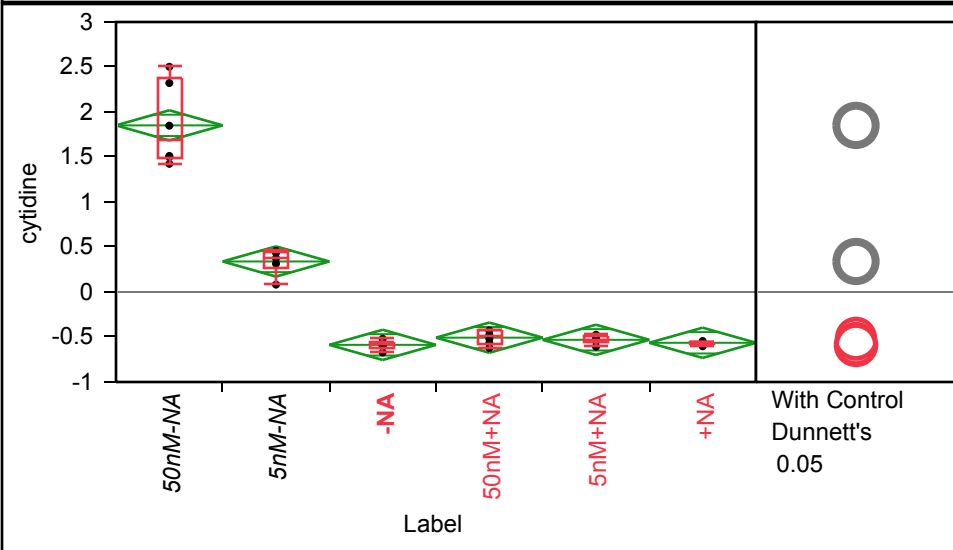

**Quantiles**

| Level   | Minimum  | 10%      | 25%      | Median   | 75%      | 90%      | Maximum  |
|---------|----------|----------|----------|----------|----------|----------|----------|
| 50nM-NA | 1.423975 | 1.423975 | 1.480996 | 1.679897 | 2.367293 | 2.50255  | 2.50255  |
| 5nM-NA  | 0.081869 | 0.081869 | 0.256745 | 0.373236 | 0.44003  | 0.457015 | 0.457015 |
| -NA     | -0.6719  | -0.6719  | -0.61997 | -0.58274 | -0.55301 | -0.52022 | -0.52022 |
| 50nM+NA | -0.62108 | -0.62108 | -0.58068 | -0.49654 | -0.43263 | -0.42922 | -0.42922 |
| 5nM+NA  | -0.60727 | -0.60727 | -0.56413 | -0.53175 | -0.48832 | -0.47506 | -0.47506 |
| +NA     | -0.60317 | -0.60317 | -0.5824  | -0.55897 | -0.54508 | -0.54457 | -0.54457 |

**Oneway Anova**

**Summary of Fit**

|                            |          |
|----------------------------|----------|
| Rsquare                    | 0.959084 |
| Adj Rsquare                | 0.952264 |
| Root Mean Square Error     | 0.201236 |
| Mean of Response           | 5.56e-10 |
| Observations (or Sum Wgts) | 36       |

**Analysis of Variance**

| Source   | DF | Sum of Squares | Mean Square | F Ratio  | Prob > F |
|----------|----|----------------|-------------|----------|----------|
| Label    | 5  | 28.476822      | 5.69536     | 140.6408 | <.0001 * |
| Error    | 30 | 1.214874       | 0.04050     |          |          |
| C. Total | 35 | 29.691696      |             |          |          |

**Means for Oneway Anova**

| Level   | Number | Mean    | Std Error | Lower 95% | Upper 95% |
|---------|--------|---------|-----------|-----------|-----------|
| 50nM-NA | 6      | 1.8514  | 0.08215   | 1.684     | 2.019     |
| 5nM-NA  | 6      | 0.3391  | 0.08215   | 0.171     | 0.507     |
| -NA     | 6      | -0.5874 | 0.08215   | -0.755    | -0.420    |
| 50nM+NA | 6      | -0.5074 | 0.08215   | -0.675    | -0.340    |
| 5nM+NA  | 6      | -0.5314 | 0.08215   | -0.699    | -0.364    |
| +NA     | 6      | -0.5644 | 0.08215   | -0.732    | -0.397    |

Std Error uses a pooled estimate of error variance

**Means Comparisons**

**Comparisons with a control using Dunnnett's Method**

**Oneway Analysis of cytosine By Label**

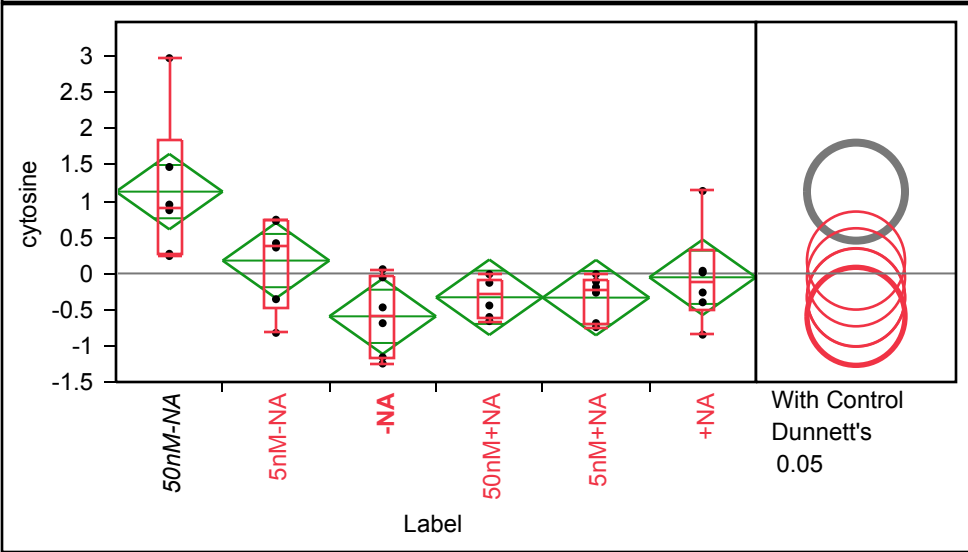

**Quantiles**

| Level   | Minimum  | 10%      | 25%      | Median   | 75%      | 90%      | Maximum  |
|---------|----------|----------|----------|----------|----------|----------|----------|
| 50nM-NA | 0.240578 | 0.240578 | 0.263835 | 0.912864 | 1.847201 | 2.975105 | 2.975105 |
| 5nM-NA  | -0.82075 | -0.82075 | -0.47194 | 0.388078 | 0.729987 | 0.742497 | 0.742497 |
| -NA     | -1.24526 | -1.24526 | -1.1803  | -0.57803 | -0.02581 | 0.058657 | 0.058657 |
| 50nM+NA | -0.65884 | -0.65884 | -0.61631 | -0.28737 | -0.09954 | -0.01052 | -0.01052 |
| 5nM+NA  | -0.74201 | -0.74201 | -0.70055 | -0.22707 | -0.08552 | -0.0101  | -0.0101  |
| +NA     | -0.84617 | -0.84617 | -0.51061 | -0.12486 | 0.312621 | 1.139833 | 1.139833 |

**Oneway Anova**

**Summary of Fit**

|                            |          |
|----------------------------|----------|
| Rsquare                    | 0.491431 |
| Adj Rsquare                | 0.40667  |
| Root Mean Square Error     | 0.624454 |
| Mean of Response           | -2.8e-10 |
| Observations (or Sum Wgts) | 36       |

**Analysis of Variance**

| Source   | DF | Sum of Squares | Mean Square | F Ratio | Prob > F |
|----------|----|----------------|-------------|---------|----------|
| Label    | 5  | 11.304079      | 2.26082     | 5.7978  | 0.0007 * |
| Error    | 30 | 11.698288      | 0.38994     |         |          |
| C. Total | 35 | 23.002367      |             |         |          |

**Means for Oneway Anova**

| Level   | Number | Mean    | Std Error | Lower 95% | Upper 95% |
|---------|--------|---------|-----------|-----------|-----------|
| 50nM-NA | 6      | 1.1307  | 0.25493   | 0.610     | 1.651     |
| 5nM-NA  | 6      | 0.1780  | 0.25493   | -0.343    | 0.699     |
| -NA     | 6      | -0.5925 | 0.25493   | -1.113    | -0.072    |
| 50nM+NA | 6      | -0.3292 | 0.25493   | -0.850    | 0.191     |
| 5nM+NA  | 6      | -0.3339 | 0.25493   | -0.855    | 0.187     |
| +NA     | 6      | -0.0530 | 0.25493   | -0.574    | 0.468     |

Std Error uses a pooled estimate of error variance

**Means Comparisons**

**Comparisons with a control using Dunnett's Method**

**Oneway Analysis of dAMP By Label**

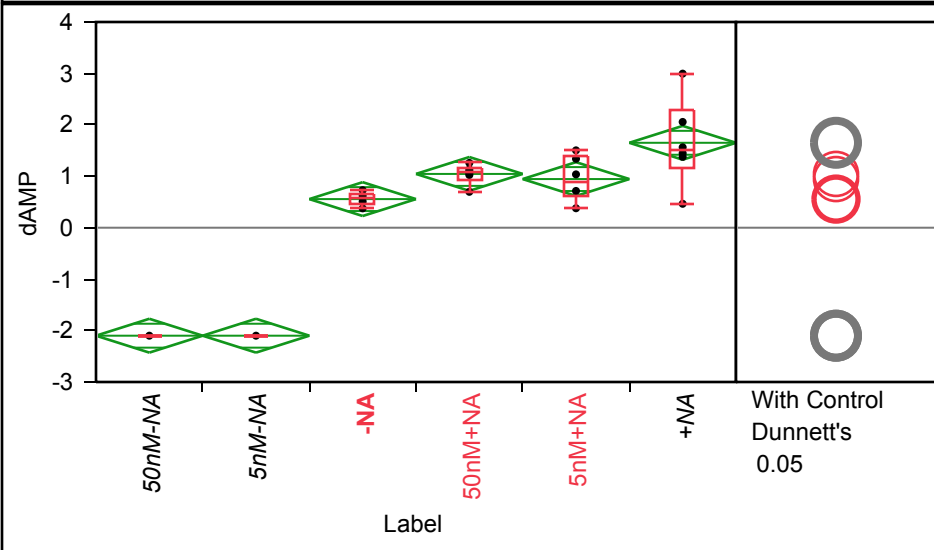

**Quantiles**

| Level   | Minimum  | 10%      | 25%      | Median   | 75%      | 90%      | Maximum  |
|---------|----------|----------|----------|----------|----------|----------|----------|
| 50nM-NA | -2.09967 | -2.09967 | -2.09967 | -2.09966 | -2.09966 | -2.09966 | -2.09966 |
| 5nM-NA  | -2.09967 | -2.09967 | -2.09967 | -2.09967 | -2.09966 | -2.09966 | -2.09966 |
| -NA     | 0.377039 | 0.377039 | 0.46159  | 0.561009 | 0.647794 | 0.728754 | 0.728754 |
| 50nM+NA | 0.698046 | 0.698046 | 0.942955 | 1.078497 | 1.166149 | 1.259855 | 1.259855 |
| 5nM+NA  | 0.378552 | 0.378552 | 0.62093  | 0.876011 | 1.380752 | 1.504136 | 1.504136 |
| +NA     | 0.465208 | 0.465208 | 1.149622 | 1.505957 | 2.291368 | 2.995651 | 2.995651 |

**Oneway Anova**

**Summary of Fit**

|                            |          |
|----------------------------|----------|
| Rsquare                    | 0.946806 |
| Adj Rsquare                | 0.937941 |
| Root Mean Square Error     | 0.394375 |
| Mean of Response           | -5.56e-9 |
| Observations (or Sum Wgts) | 36       |

**Analysis of Variance**

| Source   | DF | Sum of Squares | Mean Square | F Ratio  | Prob > F |
|----------|----|----------------|-------------|----------|----------|
| Label    | 5  | 83.050155      | 16.6100     | 106.7951 | <.0001 * |
| Error    | 30 | 4.665953       | 0.1555      |          |          |
| C. Total | 35 | 87.716108      |             |          |          |

**Means for Oneway Anova**

| Level   | Number | Mean    | Std Error | Lower 95% | Upper 95% |
|---------|--------|---------|-----------|-----------|-----------|
| 50nM-NA | 6      | -2.0997 | 0.16100   | -2.428    | -1.771    |
| 5nM-NA  | 6      | -2.0997 | 0.16100   | -2.428    | -1.771    |
| -NA     | 6      | 0.5564  | 0.16100   | 0.228     | 0.885     |
| 50nM+NA | 6      | 1.0457  | 0.16100   | 0.717     | 1.375     |
| 5nM+NA  | 6      | 0.9460  | 0.16100   | 0.617     | 1.275     |
| +NA     | 6      | 1.6512  | 0.16100   | 1.322     | 1.980     |

Std Error uses a pooled estimate of error variance

**Means Comparisons**

**Comparisons with a control using Dunnett's Method**

**Oneway Analysis of dCMP By Label**

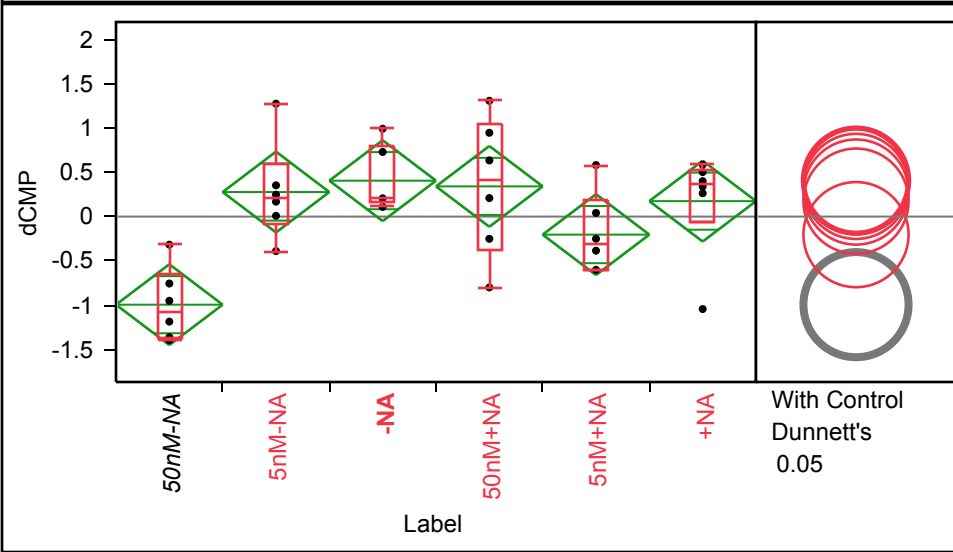

**Quantiles**

| Level   | Minimum  | 10%      | 25%      | Median   | 75%      | 90%      | Maximum  |
|---------|----------|----------|----------|----------|----------|----------|----------|
| 50nM-NA | -1.39786 | -1.39786 | -1.37206 | -1.06982 | -0.6468  | -0.3177  | -0.3177  |
| 5nM-NA  | -0.38985 | -0.38985 | -0.0908  | 0.208031 | 0.584169 | 1.276256 | 1.276256 |
| -NA     | 0.109779 | 0.109779 | 0.174996 | 0.2029   | 0.796289 | 0.993401 | 0.993401 |
| 50nM+NA | -0.80092 | -0.80092 | -0.38865 | 0.422194 | 1.037977 | 1.309208 | 1.309208 |
| 5nM+NA  | -0.60935 | -0.60935 | -0.6039  | -0.31791 | 0.176712 | 0.582179 | 0.582179 |
| +NA     | -1.0453  | -1.0453  | -0.06342 | 0.370493 | 0.523818 | 0.585837 | 0.585837 |

**Oneway Anova**

**Summary of Fit**

|                            |          |
|----------------------------|----------|
| Rsquare                    | 0.486653 |
| Adj Rsquare                | 0.401095 |
| Root Mean Square Error     | 0.547791 |
| Mean of Response           | 0        |
| Observations (or Sum Wgts) | 36       |

**Analysis of Variance**

| Source   | DF | Sum of Squares | Mean Square | F Ratio | Prob > F |
|----------|----|----------------|-------------|---------|----------|
| Label    | 5  | 8.534134       | 1.70683     | 5.6880  | 0.0008 * |
| Error    | 30 | 9.002246       | 0.30007     |         |          |
| C. Total | 35 | 17.536380      |             |         |          |

**Means for Oneway Anova**

| Level   | Number | Mean     | Std Error | Lower 95% | Upper 95% |
|---------|--------|----------|-----------|-----------|-----------|
| 50nM-NA | 6      | -0.99586 | 0.22363   | -1.453    | -0.5391   |
| 5nM-NA  | 6      | 0.27747  | 0.22363   | -0.179    | 0.7342    |
| -NA     | 6      | 0.40605  | 0.22363   | -0.051    | 0.8628    |
| 50nM+NA | 6      | 0.34150  | 0.22363   | -0.115    | 0.7982    |
| 5nM+NA  | 6      | -0.20392 | 0.22363   | -0.661    | 0.2528    |
| +NA     | 6      | 0.17476  | 0.22363   | -0.282    | 0.6315    |

Std Error uses a pooled estimate of error variance

**Means Comparisons**

**Comparisons with a control using Dunnnett's Method**



**Oneway Analysis of deoxyadenosine By Label**

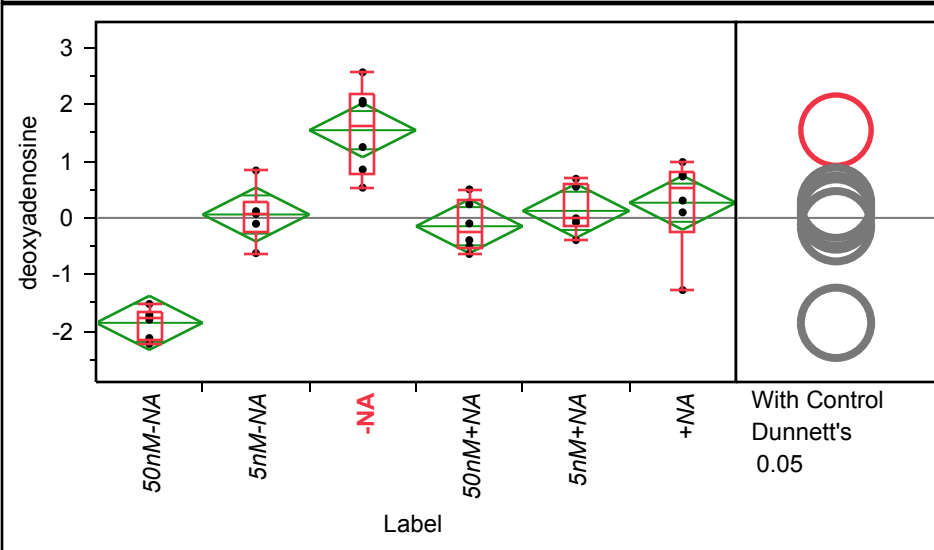

**Quantiles**

| Level   | Minimum  | 10%      | 25%      | Median   | 75%      | 90%      | Maximum  |
|---------|----------|----------|----------|----------|----------|----------|----------|
| 50nM-NA | -2.2233  | -2.2233  | -2.14734 | -1.77148 | -1.6614  | -1.51974 | -1.51974 |
| 5nM-NA  | -0.62238 | -0.62238 | -0.23349 | 0.064526 | 0.298013 | 0.836866 | 0.836866 |
| -NA     | 0.533422 | 0.533422 | 0.773582 | 1.635041 | 2.190738 | 2.569893 | 2.569893 |
| 50nM+NA | -0.63657 | -0.63657 | -0.5352  | -0.24534 | 0.306386 | 0.503005 | 0.503005 |
| 5nM+NA  | -0.39252 | -0.39252 | -0.15599 | -0.01235 | 0.583736 | 0.690364 | 0.690364 |
| +NA     | -1.27495 | -1.27495 | -0.24526 | 0.519073 | 0.817145 | 0.985658 | 0.985658 |

**Oneway Anova**

**Summary of Fit**

|                            |          |
|----------------------------|----------|
| Rsquare                    | 0.784079 |
| Adj Rsquare                | 0.748092 |
| Root Mean Square Error     | 0.572133 |
| Mean of Response           | 2.78e-11 |
| Observations (or Sum Wgts) | 36       |

**Analysis of Variance**

| Source   | DF | Sum of Squares | Mean Square | F Ratio | Prob > F |
|----------|----|----------------|-------------|---------|----------|
| Label    | 5  | 35.659954      | 7.13199     | 21.7880 | <.0001 * |
| Error    | 30 | 9.820091       | 0.32734     |         |          |
| C. Total | 35 | 45.480046      |             |         |          |

**Means for Oneway Anova**

| Level   | Number | Mean    | Std Error | Lower 95% | Upper 95% |
|---------|--------|---------|-----------|-----------|-----------|
| 50nM-NA | 6      | -1.8528 | 0.23357   | -2.330    | -1.376    |
| 5nM-NA  | 6      | 0.0597  | 0.23357   | -0.417    | 0.537     |
| -NA     | 6      | 1.5486  | 0.23357   | 1.072     | 2.026     |
| 50nM+NA | 6      | -0.1475 | 0.23357   | -0.624    | 0.330     |
| 5nM+NA  | 6      | 0.1240  | 0.23357   | -0.353    | 0.601     |
| +NA     | 6      | 0.2680  | 0.23357   | -0.209    | 0.745     |

Std Error uses a pooled estimate of error variance

**Means Comparisons**

**Comparisons with a control using Dunnett's Method**

**Oneway Analysis of Deoxyheptulose-7-phosphate By Label**

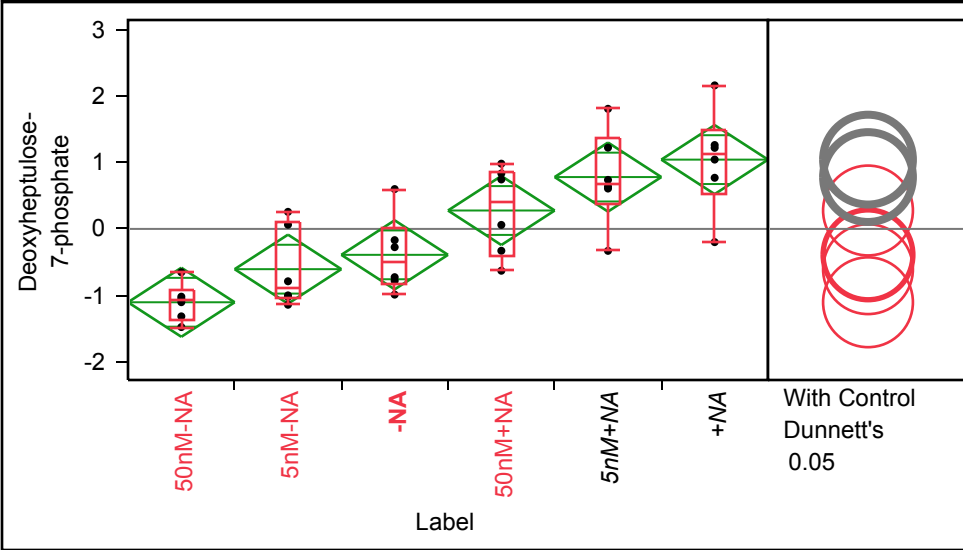

**Quantiles**

| Level   | Minimum  | 10%      | 25%      | Median   | 75%      | 90%      | Maximum  |
|---------|----------|----------|----------|----------|----------|----------|----------|
| 50nM-NA | -1.47719 | -1.47719 | -1.35665 | -1.07897 | -0.9282  | -0.65311 | -0.65311 |
| 5nM-NA  | -1.14152 | -1.14152 | -1.05433 | -0.89461 | 0.11167  | 0.25663  | 0.25663  |
| -NA     | -0.98897 | -0.98897 | -0.83368 | -0.50049 | 0.023151 | 0.59947  | 0.59947  |
| 50nM+NA | -0.62932 | -0.62932 | -0.40413 | 0.402282 | 0.871292 | 0.981648 | 0.981648 |
| 5nM+NA  | -0.33004 | -0.33004 | 0.373183 | 0.687207 | 1.369107 | 1.807507 | 1.807507 |
| +NA     | -0.19892 | -0.19892 | 0.527441 | 1.131897 | 1.486899 | 2.160379 | 2.160379 |

**Oneway Anova**

**Summary of Fit**

|                            |          |
|----------------------------|----------|
| Rsquare                    | 0.643951 |
| Adj Rsquare                | 0.58461  |
| Root Mean Square Error     | 0.623184 |
| Mean of Response           | 2.78e-10 |
| Observations (or Sum Wgts) | 36       |

**Analysis of Variance**

| Source   | DF | Sum of Squares | Mean Square | F Ratio | Prob > F |
|----------|----|----------------|-------------|---------|----------|
| Label    | 5  | 21.071595      | 4.21432     | 10.8516 | <.0001 * |
| Error    | 30 | 11.650744      | 0.38836     |         |          |
| C. Total | 35 | 32.722339      |             |         |          |

**Means for Oneway Anova**

| Level   | Number | Mean    | Std Error | Lower 95% | Upper 95% |
|---------|--------|---------|-----------|-----------|-----------|
| 50nM-NA | 6      | -1.1041 | 0.25441   | -1.624    | -0.585    |
| 5nM-NA  | 6      | -0.6060 | 0.25441   | -1.126    | -0.086    |
| -NA     | 6      | -0.3902 | 0.25441   | -0.910    | 0.129     |
| 50nM+NA | 6      | 0.2771  | 0.25441   | -0.243    | 0.797     |
| 5nM+NA  | 6      | 0.7804  | 0.25441   | 0.261     | 1.300     |
| +NA     | 6      | 1.0429  | 0.25441   | 0.523     | 1.562     |

Std Error uses a pooled estimate of error variance

**Means Comparisons**

**Comparisons with a control using Dunnett's Method**

**Oneway Analysis of deoxyribose-phosphate By Label**

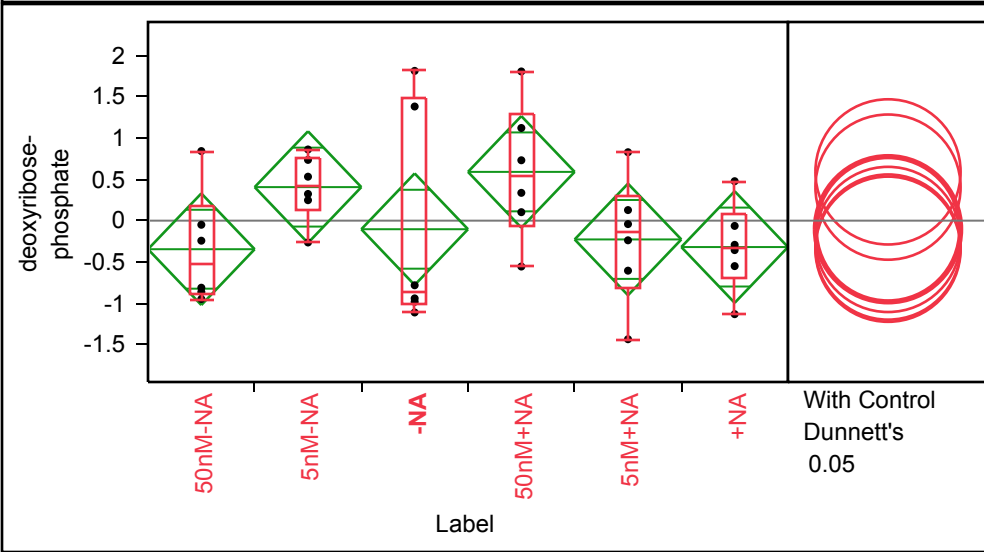

**Quantiles**

| Level   | Minimum  | 10%      | 25%      | Median   | 75%      | 90%      | Maximum  |
|---------|----------|----------|----------|----------|----------|----------|----------|
| 50nM-NA | -0.95023 | -0.95023 | -0.88626 | -0.52795 | 0.173462 | 0.843538 | 0.843538 |
| 5nM-NA  | -0.26443 | -0.26443 | 0.119989 | 0.428234 | 0.768139 | 0.862741 | 0.862741 |
| -NA     | -1.11299 | -1.11299 | -1.01609 | -0.86301 | 1.491686 | 1.815733 | 1.815733 |
| 50nM+NA | -0.55628 | -0.55628 | -0.06198 | 0.53453  | 1.294672 | 1.808679 | 1.808679 |
| 5nM+NA  | -1.43746 | -1.43746 | -0.81414 | -0.13993 | 0.303489 | 0.829524 | 0.829524 |
| +NA     | -1.13366 | -1.13366 | -0.69669 | -0.32501 | 0.071748 | 0.478221 | 0.478221 |

**Oneway Anova**

**Summary of Fit**

|                            |          |
|----------------------------|----------|
| Rsquare                    | 0.195506 |
| Adj Rsquare                | 0.061423 |
| Root Mean Square Error     | 0.811332 |
| Mean of Response           | 2.78e-10 |
| Observations (or Sum Wgts) | 36       |

**Analysis of Variance**

| Source   | DF | Sum of Squares | Mean Square | F Ratio | Prob > F |
|----------|----|----------------|-------------|---------|----------|
| Label    | 5  | 4.799048       | 0.959810    | 1.4581  | 0.2328   |
| Error    | 30 | 19.747807      | 0.658260    |         |          |
| C. Total | 35 | 24.546854      |             |         |          |

**Means for Oneway Anova**

| Level   | Number | Mean     | Std Error | Lower 95% | Upper 95% |
|---------|--------|----------|-----------|-----------|-----------|
| 50nM-NA | 6      | -0.34624 | 0.33123   | -1.023    | 0.3302    |
| 5nM-NA  | 6      | 0.40659  | 0.33123   | -0.270    | 1.0830    |
| -NA     | 6      | -0.10390 | 0.33123   | -0.780    | 0.5726    |
| 50nM+NA | 6      | 0.59126  | 0.33123   | -0.085    | 1.2677    |
| 5nM+NA  | 6      | -0.22767 | 0.33123   | -0.904    | 0.4488    |
| +NA     | 6      | -0.32004 | 0.33123   | -0.996    | 0.3564    |

Std Error uses a pooled estimate of error variance

**Means Comparisons**

**Comparisons with a control using Dunnett's Method**

**Oneway Analysis of deoxyuridine By Label**

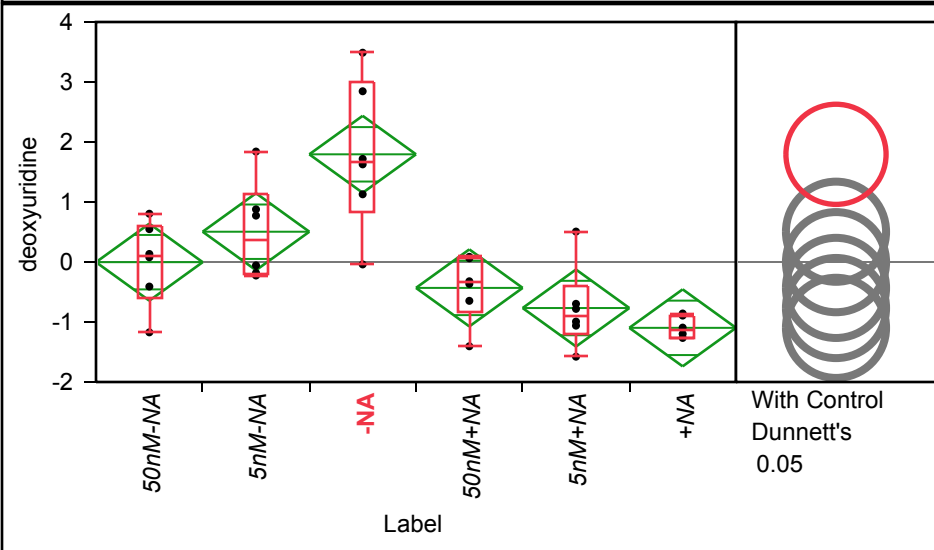

**Quantiles**

| Level   | Minimum  | 10%      | 25%      | Median   | 75%      | 90%      | Maximum  |
|---------|----------|----------|----------|----------|----------|----------|----------|
| 50nM-NA | -1.17237 | -1.17237 | -0.60014 | 0.106233 | 0.611868 | 0.804521 | 0.804521 |
| 5nM-NA  | -0.22543 | -0.22543 | -0.1929  | 0.358363 | 1.11848  | 1.840688 | 1.840688 |
| -NA     | -0.04041 | -0.04041 | 0.836287 | 1.673092 | 3.006336 | 3.487991 | 3.487991 |
| 50nM+NA | -1.40479 | -1.40479 | -0.83674 | -0.34353 | 0.068433 | 0.085826 | 0.085826 |
| 5nM+NA  | -1.57795 | -1.57795 | -1.18989 | -0.88715 | -0.39625 | 0.506966 | 0.506966 |
| +NA     | -1.27615 | -1.27615 | -1.26834 | -1.14564 | -0.88429 | -0.85869 | -0.85869 |

**Oneway Anova**

**Summary of Fit**

|                            |          |
|----------------------------|----------|
| Rsquare                    | 0.648241 |
| Adj Rsquare                | 0.589614 |
| Root Mean Square Error     | 0.769421 |
| Mean of Response           | -2.5e-17 |
| Observations (or Sum Wgts) | 36       |

**Analysis of Variance**

| Source   | DF | Sum of Squares | Mean Square | F Ratio | Prob > F |
|----------|----|----------------|-------------|---------|----------|
| Label    | 5  | 32.729600      | 6.54592     | 11.0571 | <.0001 * |
| Error    | 30 | 17.760267      | 0.59201     |         |          |
| C. Total | 35 | 50.489867      |             |         |          |

**Means for Oneway Anova**

| Level   | Number | Mean    | Std Error | Lower 95% | Upper 95% |
|---------|--------|---------|-----------|-----------|-----------|
| 50nM-NA | 6      | -0.0029 | 0.31411   | -0.644    | 0.639     |
| 5nM-NA  | 6      | 0.5046  | 0.31411   | -0.137    | 1.146     |
| -NA     | 6      | 1.7947  | 0.31411   | 1.153     | 2.436     |
| 50nM+NA | 6      | -0.4318 | 0.31411   | -1.073    | 0.210     |
| 5nM+NA  | 6      | -0.7672 | 0.31411   | -1.409    | -0.126    |
| +NA     | 6      | -1.0974 | 0.31411   | -1.739    | -0.456    |

Std Error uses a pooled estimate of error variance

**Means Comparisons**

**Comparisons with a control using Dunnett's Method**

**Oneway Analysis of dGDP By Label**

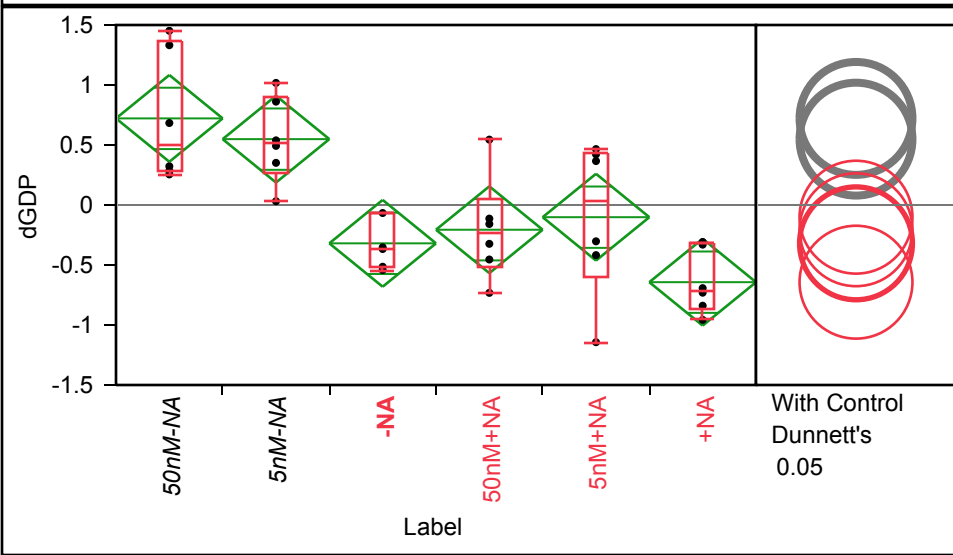

**Quantiles**

| Level   | Minimum  | 10%      | 25%      | Median   | 75%      | 90%      | Maximum  |
|---------|----------|----------|----------|----------|----------|----------|----------|
| 50nM-NA | 0.254939 | 0.254939 | 0.277801 | 0.503026 | 1.361674 | 1.451872 | 1.451872 |
| 5nM-NA  | 0.031607 | 0.031607 | 0.271317 | 0.515715 | 0.900306 | 1.017365 | 1.017365 |
| -NA     | -0.54225 | -0.54225 | -0.52151 | -0.35985 | -0.07191 | -0.0669  | -0.0669  |
| 50nM+NA | -0.73209 | -0.73209 | -0.52367 | -0.24089 | 0.051041 | 0.544771 | 0.544771 |
| 5nM+NA  | -1.14339 | -1.14339 | -0.59911 | 0.031749 | 0.433052 | 0.465778 | 0.465778 |
| +NA     | -0.95741 | -0.95741 | -0.86885 | -0.71183 | -0.32492 | -0.30852 | -0.30852 |

**Oneway Anova**

**Summary of Fit**

|                            |          |
|----------------------------|----------|
| Rsquare                    | 0.596635 |
| Adj Rsquare                | 0.529407 |
| Root Mean Square Error     | 0.433623 |
| Mean of Response           | 5.56e-10 |
| Observations (or Sum Wgts) | 36       |

**Analysis of Variance**

| Source   | DF | Sum of Squares | Mean Square | F Ratio | Prob > F |
|----------|----|----------------|-------------|---------|----------|
| Label    | 5  | 8.343634       | 1.66873     | 8.8749  | <.0001 * |
| Error    | 30 | 5.640855       | 0.18803     |         |          |
| C. Total | 35 | 13.984489      |             |         |          |

**Means for Oneway Anova**

| Level   | Number | Mean     | Std Error | Lower 95% | Upper 95% |
|---------|--------|----------|-----------|-----------|-----------|
| 50nM-NA | 6      | 0.72165  | 0.17703   | 0.360     | 1.083     |
| 5nM-NA  | 6      | 0.54882  | 0.17703   | 0.187     | 0.910     |
| -NA     | 6      | -0.31950 | 0.17703   | -0.681    | 0.042     |
| 50nM+NA | 6      | -0.20614 | 0.17703   | -0.568    | 0.155     |
| 5nM+NA  | 6      | -0.10161 | 0.17703   | -0.463    | 0.260     |
| +NA     | 6      | -0.64322 | 0.17703   | -1.005    | -0.282    |

Std Error uses a pooled estimate of error variance

**Means Comparisons**

**Comparisons with a control using Dunnett's Method**

**Oneway Analysis of D-gluconate By Label**

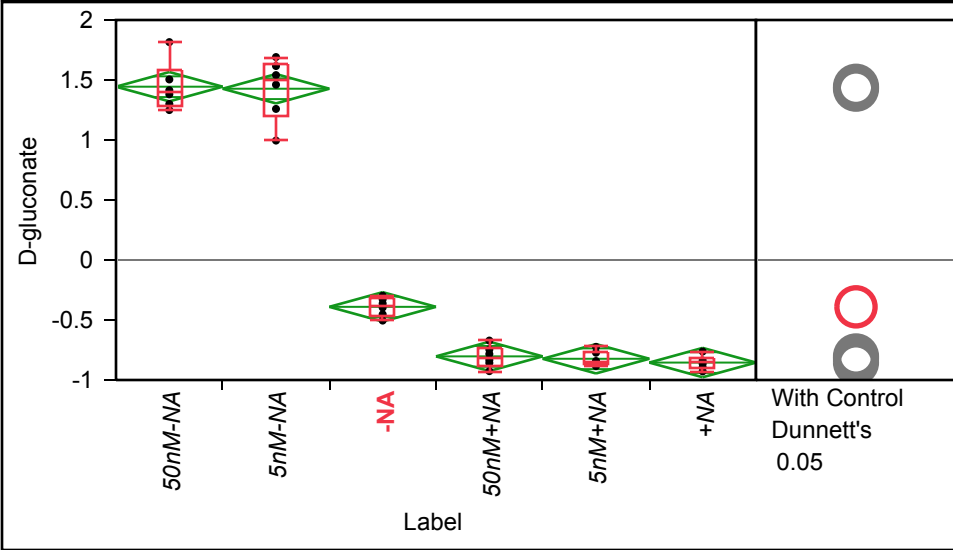

**Quantiles**

| Level   | Minimum  | 10%      | 25%      | Median   | 75%      | 90%      | Maximum  |
|---------|----------|----------|----------|----------|----------|----------|----------|
| 50nM-NA | 1.249535 | 1.249535 | 1.287454 | 1.397604 | 1.582301 | 1.815725 | 1.815725 |
| 5nM-NA  | 0.995236 | 0.995236 | 1.193076 | 1.500845 | 1.635035 | 1.691199 | 1.691199 |
| -NA     | -0.5048  | -0.5048  | -0.46558 | -0.37978 | -0.32025 | -0.29756 | -0.29756 |
| 50nM+NA | -0.92619 | -0.92619 | -0.87511 | -0.80841 | -0.72742 | -0.67149 | -0.67149 |
| 5nM+NA  | -0.88436 | -0.88436 | -0.86881 | -0.847   | -0.76053 | -0.72429 | -0.72429 |
| +NA     | -0.92818 | -0.92818 | -0.90345 | -0.85261 | -0.81883 | -0.76257 | -0.76257 |

**Oneway Anova**

**Summary of Fit**

|                            |          |
|----------------------------|----------|
| Rsquare                    | 0.983297 |
| Adj Rsquare                | 0.980514 |
| Root Mean Square Error     | 0.146625 |
| Mean of Response           | 0        |
| Observations (or Sum Wgts) | 36       |

**Analysis of Variance**

| Source   | DF | Sum of Squares | Mean Square | F Ratio  | Prob > F |
|----------|----|----------------|-------------|----------|----------|
| Label    | 5  | 37.969691      | 7.59394     | 353.2245 | <.0001 * |
| Error    | 30 | 0.644967       | 0.02150     |          |          |
| C. Total | 35 | 38.614658      |             |          |          |

**Means for Oneway Anova**

| Level   | Number | Mean    | Std Error | Lower 95% | Upper 95% |
|---------|--------|---------|-----------|-----------|-----------|
| 50nM-NA | 6      | 1.4442  | 0.05986   | 1.322     | 1.566     |
| 5nM-NA  | 6      | 1.4272  | 0.05986   | 1.305     | 1.549     |
| -NA     | 6      | -0.3904 | 0.05986   | -0.513    | -0.268    |
| 50nM+NA | 6      | -0.8031 | 0.05986   | -0.925    | -0.681    |
| 5nM+NA  | 6      | -0.8231 | 0.05986   | -0.945    | -0.701    |
| +NA     | 6      | -0.8548 | 0.05986   | -0.977    | -0.733    |

Std Error uses a pooled estimate of error variance

**Means Comparisons**

**Comparisons with a control using Dunnett's Method**

**Oneway Analysis of dihydroxy-acetone-phosphate By Label**

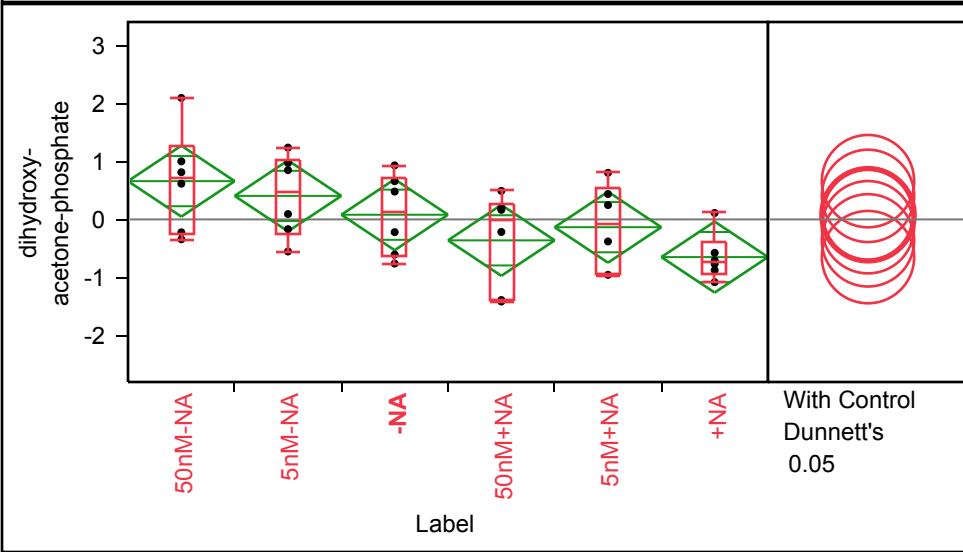

**Quantiles**

| Level   | Minimum  | 10%      | 25%      | Median   | 75%      | 90%      | Maximum  |
|---------|----------|----------|----------|----------|----------|----------|----------|
| 50nM-NA | -0.34399 | -0.34399 | -0.25379 | 0.716072 | 1.277244 | 2.099365 | 2.099365 |
| 5nM-NA  | -0.55415 | -0.55415 | -0.26482 | 0.47189  | 1.042232 | 1.240734 | 1.240734 |
| -NA     | -0.76312 | -0.76312 | -0.64638 | 0.130587 | 0.728258 | 0.933143 | 0.933143 |
| 50nM+NA | -1.41867 | -1.41867 | -1.39976 | -0.02586 | 0.272552 | 0.492885 | 0.492885 |
| 5nM+NA  | -0.96115 | -0.96115 | -0.95846 | -0.06687 | 0.530357 | 0.804719 | 0.804719 |
| +NA     | -1.08463 | -1.08463 | -0.92878 | -0.73971 | -0.40591 | 0.111053 | 0.111053 |

**Oneway Anova**

**Summary of Fit**

|                            |          |
|----------------------------|----------|
| Rsquare                    | 0.304258 |
| Adj Rsquare                | 0.188302 |
| Root Mean Square Error     | 0.735297 |
| Mean of Response           | 2.78e-10 |
| Observations (or Sum Wgts) | 36       |

**Analysis of Variance**

| Source   | DF | Sum of Squares | Mean Square | F Ratio | Prob > F |
|----------|----|----------------|-------------|---------|----------|
| Label    | 5  | 7.093190       | 1.41864     | 2.6239  | 0.0440 * |
| Error    | 30 | 16.219848      | 0.54066     |         |          |
| C. Total | 35 | 23.313038      |             |         |          |

**Means for Oneway Anova**

| Level   | Number | Mean     | Std Error | Lower 95% | Upper 95% |
|---------|--------|----------|-----------|-----------|-----------|
| 50nM-NA | 6      | 0.66117  | 0.30018   | 0.048     | 1.274     |
| 5nM-NA  | 6      | 0.40634  | 0.30018   | -0.207    | 1.019     |
| -NA     | 6      | 0.08062  | 0.30018   | -0.532    | 0.694     |
| 50nM+NA | 6      | -0.36198 | 0.30018   | -0.975    | 0.251     |
| 5nM+NA  | 6      | -0.13481 | 0.30018   | -0.748    | 0.478     |
| +NA     | 6      | -0.65134 | 0.30018   | -1.264    | -0.038    |

Std Error uses a pooled estimate of error variance

**Means Comparisons**

**Comparisons with a control using Dunnett's Method**

**Oneway Analysis of dimethylglycine By Label**

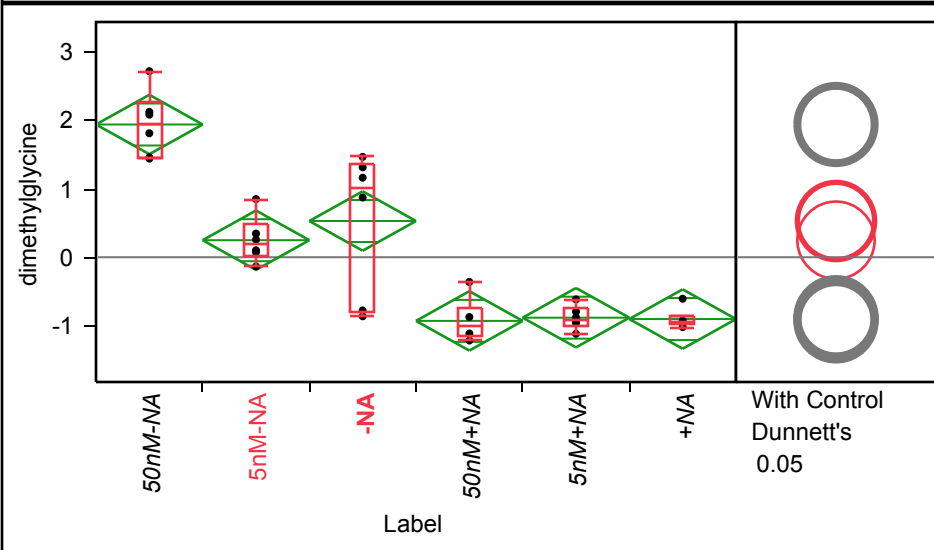

**Quantiles**

| Level   | Minimum  | 10%      | 25%      | Median   | 75%      | 90%      | Maximum  |
|---------|----------|----------|----------|----------|----------|----------|----------|
| 50nM-NA | 1.446557 | 1.446557 | 1.460552 | 1.954373 | 2.28077  | 2.72813  | 2.72813  |
| 5nM-NA  | -0.13513 | -0.13513 | 0.022158 | 0.179646 | 0.473231 | 0.852759 | 0.852759 |
| -NA     | -0.86627 | -0.86627 | -0.80216 | 1.021203 | 1.357221 | 1.471435 | 1.471435 |
| 50nM+NA | -1.22184 | -1.22184 | -1.15542 | -1.00393 | -0.74873 | -0.36265 | -0.36265 |
| 5nM+NA  | -1.12306 | -1.12306 | -1.00531 | -0.90756 | -0.75284 | -0.61801 | -0.61801 |
| +NA     | -1.02426 | -1.02426 | -0.99029 | -0.95029 | -0.84866 | -0.609   | -0.609   |

**Oneway Anova**

**Summary of Fit**

|                            |          |
|----------------------------|----------|
| Rsquare                    | 0.829037 |
| Adj Rsquare                | 0.800543 |
| Root Mean Square Error     | 0.522318 |
| Mean of Response           | -5.6e-10 |
| Observations (or Sum Wgts) | 36       |

**Analysis of Variance**

| Source   | DF | Sum of Squares | Mean Square | F Ratio | Prob > F |
|----------|----|----------------|-------------|---------|----------|
| Label    | 5  | 39.688270      | 7.93765     | 29.0952 | <.0001 * |
| Error    | 30 | 8.184485       | 0.27282     |         |          |
| C. Total | 35 | 47.872755      |             |         |          |

**Means for Oneway Anova**

| Level   | Number | Mean    | Std Error | Lower 95% | Upper 95% |
|---------|--------|---------|-----------|-----------|-----------|
| 50nM-NA | 6      | 1.9467  | 0.21324   | 1.511     | 2.382     |
| 5nM-NA  | 6      | 0.2497  | 0.21324   | -0.186    | 0.685     |
| -NA     | 6      | 0.5310  | 0.21324   | 0.096     | 0.966     |
| 50nM+NA | 6      | -0.9338 | 0.21324   | -1.369    | -0.498    |
| 5nM+NA  | 6      | -0.8867 | 0.21324   | -1.322    | -0.451    |
| +NA     | 6      | -0.9069 | 0.21324   | -1.342    | -0.471    |

Std Error uses a pooled estimate of error variance

**Means Comparisons**

**Comparisons with a control using Dunnett's Method**



**Oneway Analysis of DL-Pipecolic acid By Label**

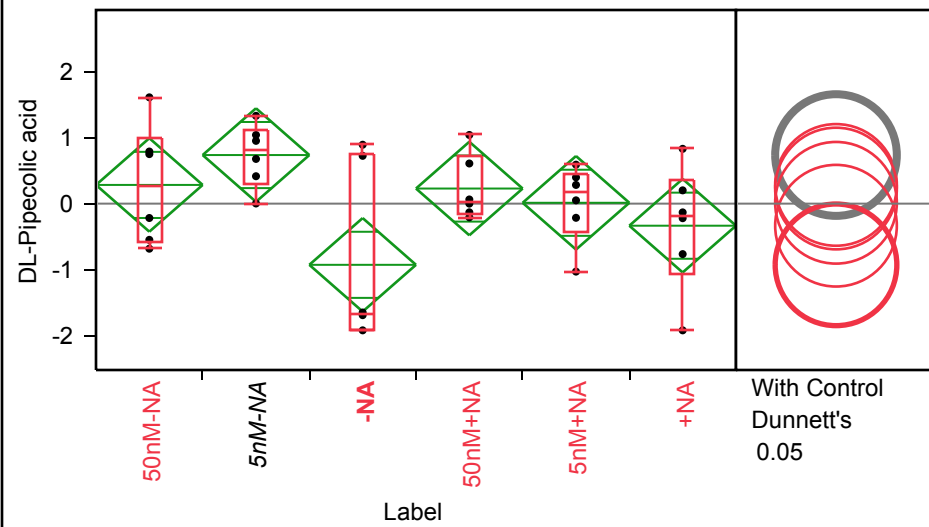

**Quantiles**

| Level   | Minimum | 10%     | 25%      | Median   | 75%     | 90%   | Maximum |
|---------|---------|---------|----------|----------|---------|-------|---------|
| 50nM-NA | -0.683  | -0.683  | -0.5825  | 0.266    | 0.99425 | 1.61  | 1.61    |
| 5nM-NA  | 0.00198 | 0.00198 | 0.311745 | 0.814    | 1.1125  | 1.33  | 1.33    |
| -NA     | -1.92   | -1.92   | -1.92    | -1.67    | 0.766   | 0.892 | 0.892   |
| 50nM+NA | -0.208  | -0.208  | -0.151   | 0.031337 | 0.716   | 1.04  | 1.04    |
| 5nM+NA  | -1.03   | -1.03   | -0.41875 | 0.16625  | 0.446   | 0.59  | 0.59    |
| +NA     | -1.92   | -1.92   | -1.05375 | -0.177   | 0.35825 | 0.83  | 0.83    |

**Oneway Anova**

**Summary of Fit**

|                            |          |
|----------------------------|----------|
| Rsquare                    | 0.313223 |
| Adj Rsquare                | 0.198761 |
| Root Mean Square Error     | 0.849572 |
| Mean of Response           | -0.00033 |
| Observations (or Sum Wgts) | 36       |

**Analysis of Variance**

| Source   | DF | Sum of Squares | Mean Square | F Ratio | Prob > F |
|----------|----|----------------|-------------|---------|----------|
| Label    | 5  | 9.875539       | 1.97511     | 2.7365  | 0.0375 * |
| Error    | 30 | 21.653198      | 0.72177     |         |          |
| C. Total | 35 | 31.528738      |             |         |          |

**Means for Oneway Anova**

| Level   | Number | Mean     | Std Error | Lower 95% | Upper 95% |
|---------|--------|----------|-----------|-----------|-----------|
| 50nM-NA | 6      | 0.28317  | 0.34684   | -0.425    | 0.992     |
| 5nM-NA  | 6      | 0.73583  | 0.34684   | 0.027     | 1.444     |
| -NA     | 6      | -0.92733 | 0.34684   | -1.636    | -0.219    |
| 50nM+NA | 6      | 0.22845  | 0.34684   | -0.480    | 0.937     |
| 5nM+NA  | 6      | 0.01258  | 0.34684   | -0.696    | 0.721     |
| +NA     | 6      | -0.33467 | 0.34684   | -1.043    | 0.374     |

Std Error uses a pooled estimate of error variance

**Means Comparisons**

**Comparisons with a control using Dunnnett's Method**

**Oneway Analysis of D-sedoheptulose-1-7-bisphosphate By Label**

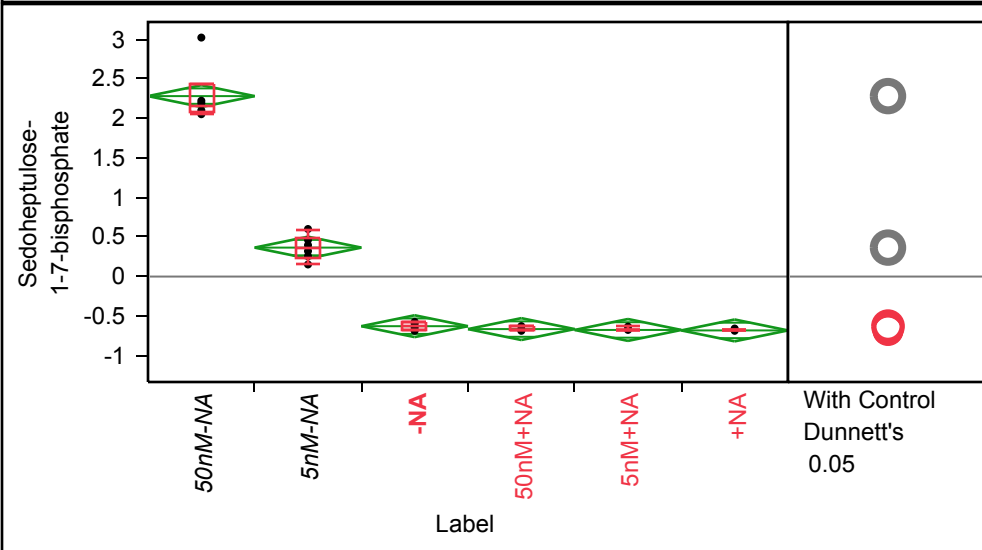

**Quantiles**

| Level   | Minimum  | 10%      | 25%      | Median   | 75%      | 90%      | Maximum  |
|---------|----------|----------|----------|----------|----------|----------|----------|
| 50nM-NA | 2.051149 | 2.051149 | 2.086099 | 2.144911 | 2.421234 | 3.019535 | 3.019535 |
| 5nM-NA  | 0.15272  | 0.15272  | 0.232365 | 0.359733 | 0.497558 | 0.600717 | 0.600717 |
| -NA     | -0.68524 | -0.68524 | -0.68524 | -0.62168 | -0.57492 | -0.5729  | -0.5729  |
| 50nM+NA | -0.68527 | -0.68527 | -0.68527 | -0.67879 | -0.62723 | -0.62607 | -0.62607 |
| 5nM+NA  | -0.68527 | -0.68527 | -0.68526 | -0.68525 | -0.66384 | -0.63256 | -0.63256 |
| +NA     | -0.68531 | -0.68531 | -0.68527 | -0.68526 | -0.67812 | -0.65673 | -0.65673 |

**Oneway Anova**

**Summary of Fit**

|                            |          |
|----------------------------|----------|
| Rsquare                    | 0.981038 |
| Adj Rsquare                | 0.977878 |
| Root Mean Square Error     | 0.165483 |
| Mean of Response           | 8.333e-9 |
| Observations (or Sum Wgts) | 36       |

**Analysis of Variance**

| Source   | DF | Sum of Squares | Mean Square | F Ratio  | Prob > F |
|----------|----|----------------|-------------|----------|----------|
| Label    | 5  | 42.504700      | 8.50094     | 310.4282 | <.0001 * |
| Error    | 30 | 0.821537       | 0.02738     |          |          |
| C. Total | 35 | 43.326237      |             |          |          |

**Means for Oneway Anova**

| Level   | Number | Mean    | Std Error | Lower 95% | Upper 95% |
|---------|--------|---------|-----------|-----------|-----------|
| 50nM-NA | 6      | 2.2800  | 0.06756   | 2.142     | 2.418     |
| 5nM-NA  | 6      | 0.3658  | 0.06756   | 0.228     | 0.504     |
| -NA     | 6      | -0.6271 | 0.06756   | -0.765    | -0.489    |
| 50nM+NA | 6      | -0.6636 | 0.06756   | -0.802    | -0.526    |
| 5nM+NA  | 6      | -0.6746 | 0.06756   | -0.813    | -0.537    |
| +NA     | 6      | -0.6805 | 0.06756   | -0.818    | -0.543    |

Std Error uses a pooled estimate of error variance

**Means Comparisons**

**Comparisons with a control using Dunnnett's Method**

**Oneway Analysis of FAD By Label**

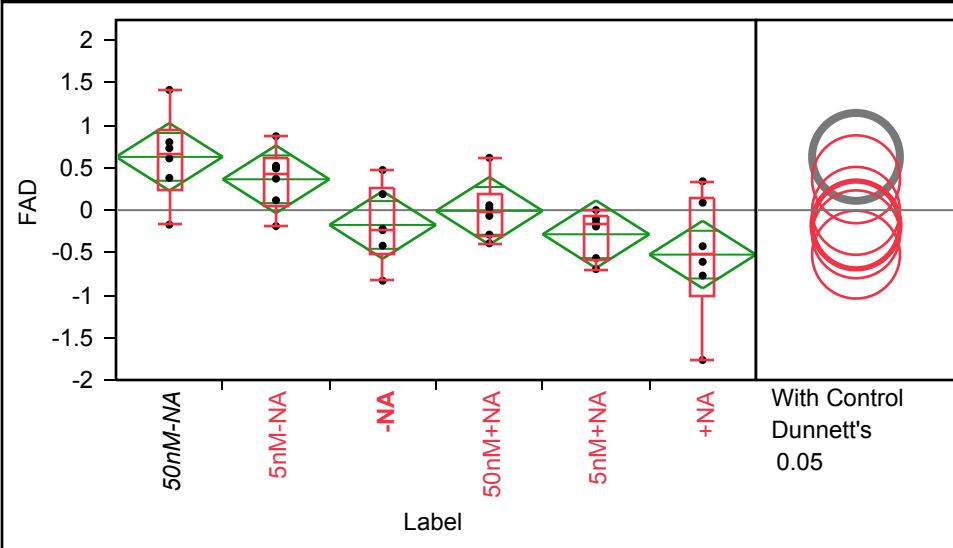

**Quantiles**

| Level   | Minimum  | 10%      | 25%      | Median   | 75%      | 90%      | Maximum  |
|---------|----------|----------|----------|----------|----------|----------|----------|
| 50nM-NA | -0.1708  | -0.1708  | 0.241794 | 0.669376 | 0.953965 | 1.414896 | 1.414896 |
| 5nM-NA  | -0.18804 | -0.18804 | 0.040213 | 0.430125 | 0.608889 | 0.870131 | 0.870131 |
| -NA     | -0.83057 | -0.83057 | -0.52141 | -0.22853 | 0.259318 | 0.471937 | 0.471937 |
| 50nM+NA | -0.39048 | -0.39048 | -0.31355 | -0.02219 | 0.196912 | 0.615628 | 0.615628 |
| 5nM+NA  | -0.69509 | -0.69509 | -0.59721 | -0.17145 | -0.0779  | 0.001435 | 0.001435 |
| +NA     | -1.76525 | -1.76525 | -1.01971 | -0.51663 | 0.15088  | 0.339716 | 0.339716 |

**Oneway Anova**

**Summary of Fit**

|                            |          |
|----------------------------|----------|
| Rsquare                    | 0.444938 |
| Adj Rsquare                | 0.352427 |
| Root Mean Square Error     | 0.476695 |
| Mean of Response           | 2.78e-11 |
| Observations (or Sum Wgts) | 36       |

**Analysis of Variance**

| Source   | DF | Sum of Squares | Mean Square | F Ratio | Prob > F |
|----------|----|----------------|-------------|---------|----------|
| Label    | 5  | 5.464613       | 1.09292     | 4.8096  | 0.0024 * |
| Error    | 30 | 6.817139       | 0.22724     |         |          |
| C. Total | 35 | 12.281752      |             |         |          |

**Means for Oneway Anova**

| Level   | Number | Mean     | Std Error | Lower 95% | Upper 95% |
|---------|--------|----------|-----------|-----------|-----------|
| 50nM-NA | 6      | 0.62708  | 0.19461   | 0.2296    | 1.025     |
| 5nM-NA  | 6      | 0.36341  | 0.19461   | -0.0340   | 0.761     |
| -NA     | 6      | -0.17427 | 0.19461   | -0.5717   | 0.223     |
| 50nM+NA | 6      | -0.00830 | 0.19461   | -0.4057   | 0.389     |
| 5nM+NA  | 6      | -0.28425 | 0.19461   | -0.6817   | 0.113     |
| +NA     | 6      | -0.52368 | 0.19461   | -0.9211   | -0.126    |

Std Error uses a pooled estimate of error variance

**Means Comparisons**

**Comparisons with a control using Dunnnett's Method**

**Oneway Analysis of folate By Label**

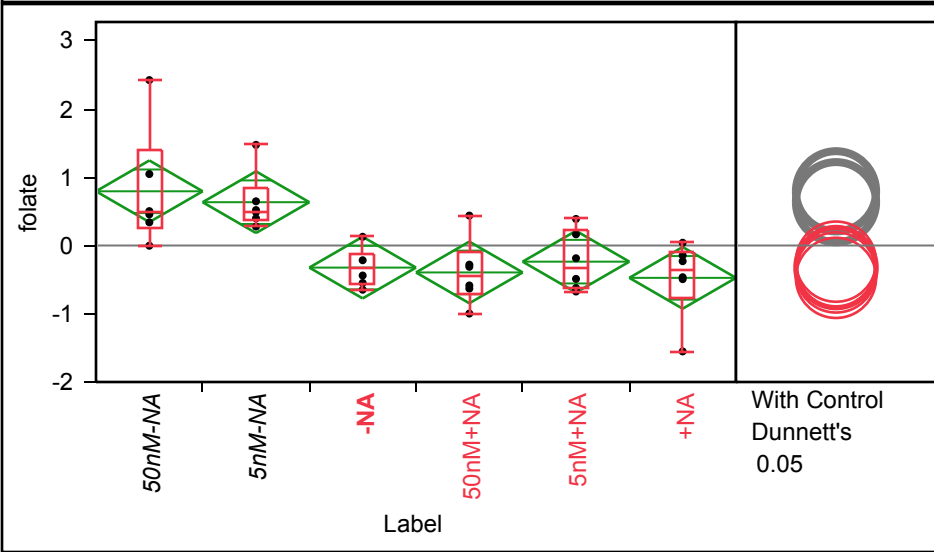

**Quantiles**

| Level   | Minimum  | 10%      | 25%      | Median   | 75%      | 90%      | Maximum  |
|---------|----------|----------|----------|----------|----------|----------|----------|
| 50nM-NA | -0.00328 | -0.00328 | 0.253586 | 0.479816 | 1.391262 | 2.423598 | 2.423598 |
| 5nM-NA  | 0.277969 | 0.277969 | 0.368118 | 0.50411  | 0.854545 | 1.474808 | 1.474808 |
| -NA     | -0.64752 | -0.64752 | -0.57345 | -0.32844 | -0.12995 | 0.127745 | 0.127745 |
| 50nM+NA | -0.99686 | -0.99686 | -0.72248 | -0.44876 | -0.10099 | 0.438236 | 0.438236 |
| 5nM+NA  | -0.67403 | -0.67403 | -0.63609 | -0.33806 | 0.220616 | 0.388956 | 0.388956 |
| +NA     | -1.55178 | -1.55178 | -0.75736 | -0.34733 | -0.09881 | 0.04011  | 0.04011  |

**Oneway Anova**

**Summary of Fit**

|                            |          |
|----------------------------|----------|
| Rsquare                    | 0.517703 |
| Adj Rsquare                | 0.43732  |
| Root Mean Square Error     | 0.541674 |
| Mean of Response           | 5.56e-11 |
| Observations (or Sum Wgts) | 36       |

**Analysis of Variance**

| Source   | DF | Sum of Squares | Mean Square | F Ratio | Prob > F |
|----------|----|----------------|-------------|---------|----------|
| Label    | 5  | 9.448501       | 1.88970     | 6.4405  | 0.0004 * |
| Error    | 30 | 8.802322       | 0.29341     |         |          |
| C. Total | 35 | 18.250823      |             |         |          |

**Means for Oneway Anova**

| Level   | Number | Mean     | Std Error | Lower 95% | Upper 95% |
|---------|--------|----------|-----------|-----------|-----------|
| 50nM-NA | 6      | 0.79438  | 0.22114   | 0.3428    | 1.246     |
| 5nM-NA  | 6      | 0.63449  | 0.22114   | 0.1829    | 1.086     |
| -NA     | 6      | -0.32354 | 0.22114   | -0.7752   | 0.128     |
| 50nM+NA | 6      | -0.39465 | 0.22114   | -0.8463   | 0.057     |
| 5nM+NA  | 6      | -0.23669 | 0.22114   | -0.6883   | 0.215     |
| +NA     | 6      | -0.47400 | 0.22114   | -0.9256   | -0.022    |

Std Error uses a pooled estimate of error variance

**Means Comparisons**

**Comparisons with a control using Dunnett's Method**

**Oneway Analysis of fructose-1,6-bisphosphate By Label**

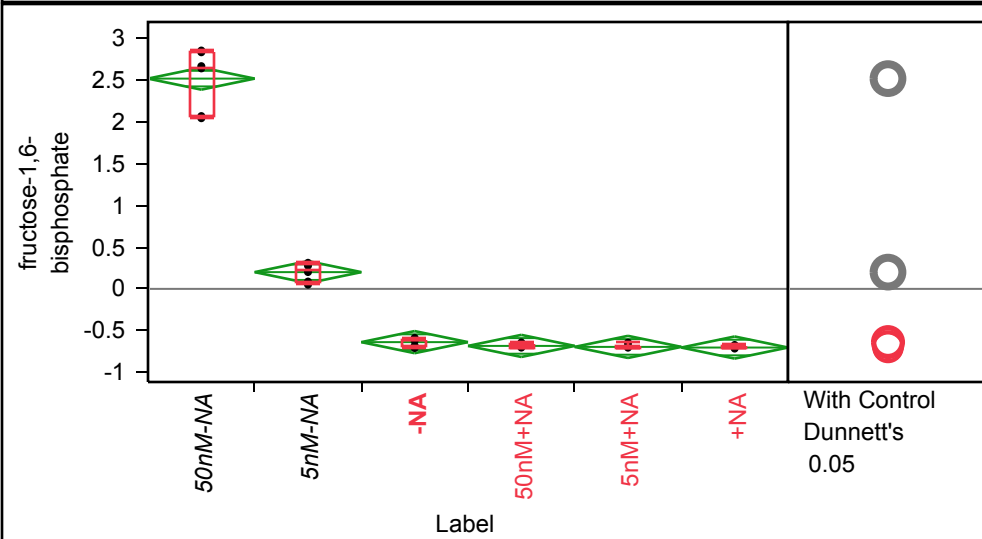

**Quantiles**

| Level   | Minimum  | 10%      | 25%      | Median   | 75%      | 90%      | Maximum  |
|---------|----------|----------|----------|----------|----------|----------|----------|
| 50nM-NA | 2.046449 | 2.046449 | 2.065396 | 2.65715  | 2.842253 | 2.857596 | 2.857596 |
| 5nM-NA  | 0.050613 | 0.050613 | 0.078231 | 0.238146 | 0.286251 | 0.312443 | 0.312443 |
| -NA     | -0.70916 | -0.70916 | -0.68786 | -0.62386 | -0.60185 | -0.58749 | -0.58749 |
| 50nM+NA | -0.71561 | -0.71561 | -0.70707 | -0.68324 | -0.6668  | -0.64291 | -0.64291 |
| 5nM+NA  | -0.7156  | -0.7156  | -0.71526 | -0.70781 | -0.67367 | -0.6452  | -0.6452  |
| +NA     | -0.7156  | -0.7156  | -0.7156  | -0.7156  | -0.68251 | -0.6729  | -0.6729  |

**Oneway Anova**

**Summary of Fit**

|                            |          |
|----------------------------|----------|
| Rsquare                    | 0.984948 |
| Adj Rsquare                | 0.98244  |
| Root Mean Square Error     | 0.158807 |
| Mean of Response           | -5.6e-10 |
| Observations (or Sum Wgts) | 36       |

**Analysis of Variance**

| Source   | DF | Sum of Squares | Mean Square | F Ratio  | Prob > F |
|----------|----|----------------|-------------|----------|----------|
| Label    | 5  | 49.508818      | 9.90176     | 392.6227 | <.0001 * |
| Error    | 30 | 0.756586       | 0.02522     |          |          |
| C. Total | 35 | 50.265404      |             |          |          |

**Means for Oneway Anova**

| Level   | Number | Mean    | Std Error | Lower 95% | Upper 95% |
|---------|--------|---------|-----------|-----------|-----------|
| 50nM-NA | 6      | 2.5212  | 0.06483   | 2.389     | 2.654     |
| 5nM-NA  | 6      | 0.2007  | 0.06483   | 0.068     | 0.333     |
| -NA     | 6      | -0.6386 | 0.06483   | -0.771    | -0.506    |
| 50nM+NA | 6      | -0.6840 | 0.06483   | -0.816    | -0.552    |
| 5nM+NA  | 6      | -0.6958 | 0.06483   | -0.828    | -0.563    |
| +NA     | 6      | -0.7035 | 0.06483   | -0.836    | -0.571    |

Std Error uses a pooled estimate of error variance

**Means Comparisons**

**Comparisons with a control using Dunnett's Method**

**Oneway Analysis of fructose-6-phosphate By Label**

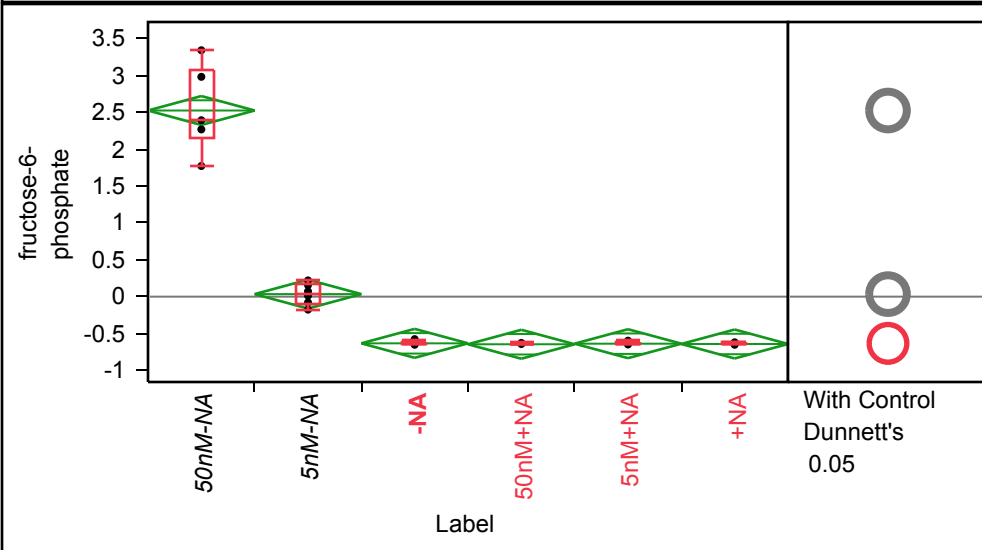

**Quantiles**

| Level   | Minimum  | 10%      | 25%      | Median   | 75%      | 90%      | Maximum  |
|---------|----------|----------|----------|----------|----------|----------|----------|
| 50nM-NA | 1.772113 | 1.772113 | 2.144052 | 2.392025 | 3.071408 | 3.341539 | 3.341539 |
| 5nM-NA  | -0.17582 | -0.17582 | -0.10314 | 0.042163 | 0.172451 | 0.219984 | 0.219984 |
| -NA     | -0.65233 | -0.65233 | -0.65233 | -0.65232 | -0.60439 | -0.57645 | -0.57645 |
| 50nM+NA | -0.65235 | -0.65235 | -0.65235 | -0.64979 | -0.63879 | -0.62719 | -0.62719 |
| 5nM+NA  | -0.65235 | -0.65235 | -0.65234 | -0.65049 | -0.61773 | -0.59709 | -0.59709 |
| +NA     | -0.65234 | -0.65234 | -0.65234 | -0.65234 | -0.62253 | -0.61944 | -0.61944 |

**Oneway Anova**

**Summary of Fit**

|                            |          |
|----------------------------|----------|
| Rsquare                    | 0.966601 |
| Adj Rsquare                | 0.961035 |
| Root Mean Square Error     | 0.235294 |
| Mean of Response           | 2.78e-10 |
| Observations (or Sum Wgts) | 36       |

**Analysis of Variance**

| Source   | DF | Sum of Squares | Mean Square | F Ratio  | Prob > F |
|----------|----|----------------|-------------|----------|----------|
| Label    | 5  | 48.068497      | 9.61370     | 173.6470 | <.0001 * |
| Error    | 30 | 1.660904       | 0.05536     |          |          |
| C. Total | 35 | 49.729400      |             |          |          |

**Means for Oneway Anova**

| Level   | Number | Mean    | Std Error | Lower 95% | Upper 95% |
|---------|--------|---------|-----------|-----------|-----------|
| 50nM-NA | 6      | 2.5245  | 0.09606   | 2.328     | 2.721     |
| 5nM-NA  | 6      | 0.0344  | 0.09606   | -0.162    | 0.231     |
| -NA     | 6      | -0.6332 | 0.09606   | -0.829    | -0.437    |
| 50nM+NA | 6      | -0.6457 | 0.09606   | -0.842    | -0.450    |
| 5nM+NA  | 6      | -0.6379 | 0.09606   | -0.834    | -0.442    |
| +NA     | 6      | -0.6421 | 0.09606   | -0.838    | -0.446    |

Std Error uses a pooled estimate of error variance

**Means Comparisons**

**Comparisons with a control using Dunnnett's Method**

**Oneway Analysis of Geranyl-PP By Label**

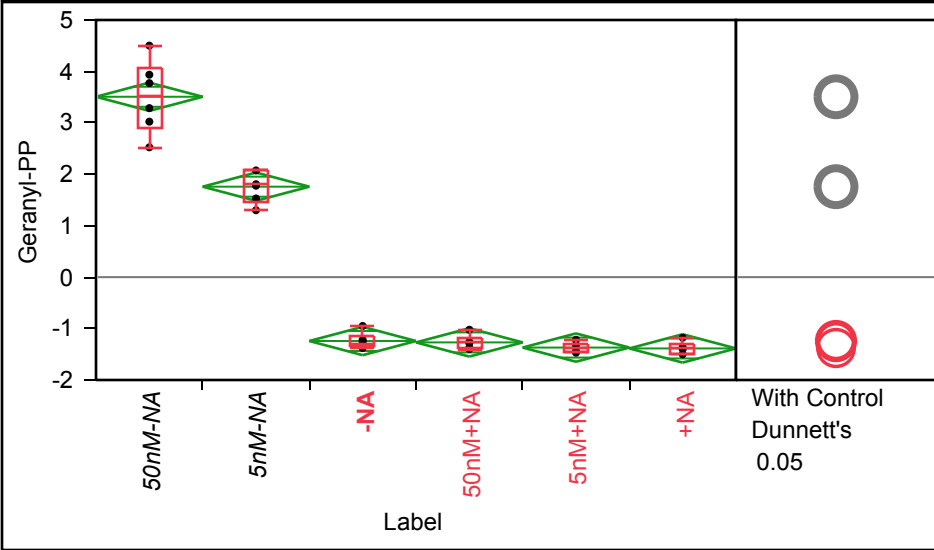

**Quantiles**

| Level   | Minimum  | 10%      | 25%      | Median   | 75%      | 90%      | Maximum  |
|---------|----------|----------|----------|----------|----------|----------|----------|
| 50nM-NA | 2.524189 | 2.524189 | 2.898344 | 3.529392 | 4.077509 | 4.501268 | 4.501268 |
| 5nM-NA  | 1.301823 | 1.301823 | 1.472988 | 1.792545 | 2.065302 | 2.07496  | 2.07496  |
| -NA     | -1.37801 | -1.37801 | -1.35157 | -1.28109 | -1.15091 | -0.94993 | -0.94993 |
| 50nM+NA | -1.39915 | -1.39915 | -1.3795  | -1.28052 | -1.19882 | -1.02272 | -1.02272 |
| 5nM+NA  | -1.46858 | -1.46858 | -1.45184 | -1.38421 | -1.29107 | -1.21752 | -1.21752 |
| +NA     | -1.50691 | -1.50691 | -1.50177 | -1.38416 | -1.31705 | -1.17855 | -1.17855 |

**Oneway Anova**

**Summary of Fit**

|                            |          |
|----------------------------|----------|
| Rsquare                    | 0.976158 |
| Adj Rsquare                | 0.972185 |
| Root Mean Square Error     | 0.330371 |
| Mean of Response           | 2.778e-9 |
| Observations (or Sum Wgts) | 36       |

**Analysis of Variance**

| Source   | DF | Sum of Squares | Mean Square | F Ratio  | Prob > F |
|----------|----|----------------|-------------|----------|----------|
| Label    | 5  | 134.06295      | 26.8126     | 245.6602 | <.0001 * |
| Error    | 30 | 3.27435        | 0.1091      |          |          |
| C. Total | 35 | 137.33730      |             |          |          |

**Means for Oneway Anova**

| Level   | Number | Mean    | Std Error | Lower 95% | Upper 95% |
|---------|--------|---------|-----------|-----------|-----------|
| 50nM-NA | 6      | 3.5073  | 0.13487   | 3.232     | 3.783     |
| 5nM-NA  | 6      | 1.7590  | 0.13487   | 1.484     | 2.034     |
| -NA     | 6      | -1.2418 | 0.13487   | -1.517    | -0.966    |
| 50nM+NA | 6      | -1.2689 | 0.13487   | -1.544    | -0.993    |
| 5nM+NA  | 6      | -1.3694 | 0.13487   | -1.645    | -1.094    |
| +NA     | 6      | -1.3862 | 0.13487   | -1.662    | -1.111    |

Std Error uses a pooled estimate of error variance

**Means Comparisons**

**Comparisons with a control using Dunnett's Method**

**Oneway Analysis of Glucaric acid By Label**

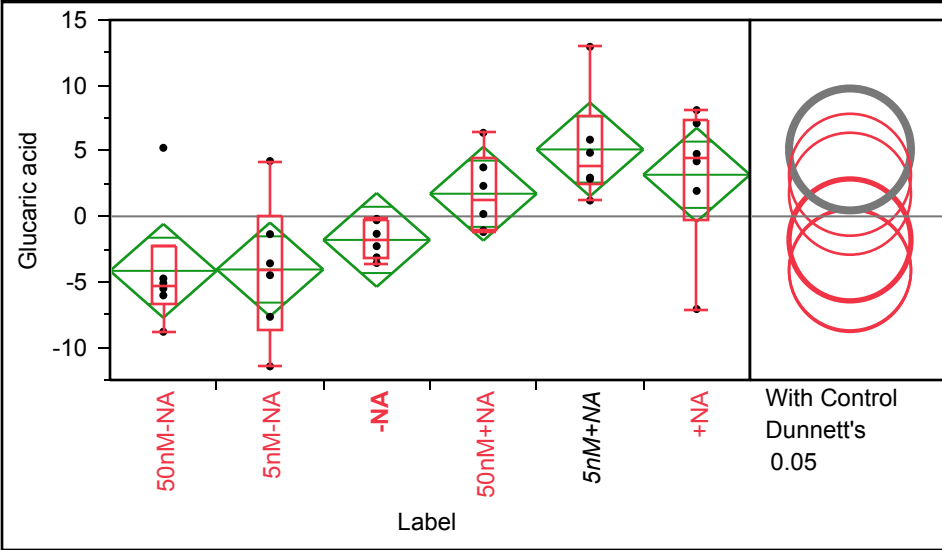

**Quantiles**

| Level   | Minimum  | 10%      | 25%      | Median   | 75%      | 90%      | Maximum  |
|---------|----------|----------|----------|----------|----------|----------|----------|
| 50nM-NA | -8.81636 | -8.81636 | -6.73043 | -5.30733 | -2.25223 | 5.236084 | 5.236084 |
| 5nM-NA  | -11.4602 | -11.4602 | -8.62029 | -4.03851 | 0.036419 | 4.225399 | 4.225399 |
| -NA     | -3.563   | -3.563   | -3.2395  | -1.80589 | -0.27079 | -0.1923  | -0.1923  |
| 50nM+NA | -1.19701 | -1.19701 | -1.10022 | 1.254928 | 4.40393  | 6.382882 | 6.382882 |
| 5nM+NA  | 1.207281 | 1.207281 | 2.440502 | 3.906316 | 7.630399 | 12.95026 | 12.95026 |
| +NA     | -7.08051 | -7.08051 | -0.31047 | 4.487595 | 7.362574 | 8.116358 | 8.116358 |

**Oneway Anova**

**Summary of Fit**

|                            |          |
|----------------------------|----------|
| Rsquare                    | 0.452797 |
| Adj Rsquare                | 0.361596 |
| Root Mean Square Error     | 4.293393 |
| Mean of Response           | -2.78e-9 |
| Observations (or Sum Wgts) | 36       |

**Analysis of Variance**

| Source   | DF | Sum of Squares | Mean Square | F Ratio | Prob > F |
|----------|----|----------------|-------------|---------|----------|
| Label    | 5  | 457.5911       | 91.5182     | 4.9649  | 0.0020 * |
| Error    | 30 | 552.9968       | 18.4332     |         |          |
| C. Total | 35 | 1010.5879      |             |         |          |

**Means for Oneway Anova**

| Level   | Number | Mean    | Std Error | Lower 95% | Upper 95% |
|---------|--------|---------|-----------|-----------|-----------|
| 50nM-NA | 6      | -4.1631 | 1.7528    | -7.743    | -0.583    |
| 5nM-NA  | 6      | -4.0576 | 1.7528    | -7.637    | -0.478    |
| -NA     | 6      | -1.7993 | 1.7528    | -5.379    | 1.780     |
| 50nM+NA | 6      | 1.7287  | 1.7528    | -1.851    | 5.308     |
| 5nM+NA  | 6      | 5.1131  | 1.7528    | 1.534     | 8.693     |
| +NA     | 6      | 3.1781  | 1.7528    | -0.402    | 6.758     |

Std Error uses a pooled estimate of error variance

**Means Comparisons**

**Comparisons with a control using Dunnett's Method**



**Oneway Analysis of Glucose By Label**

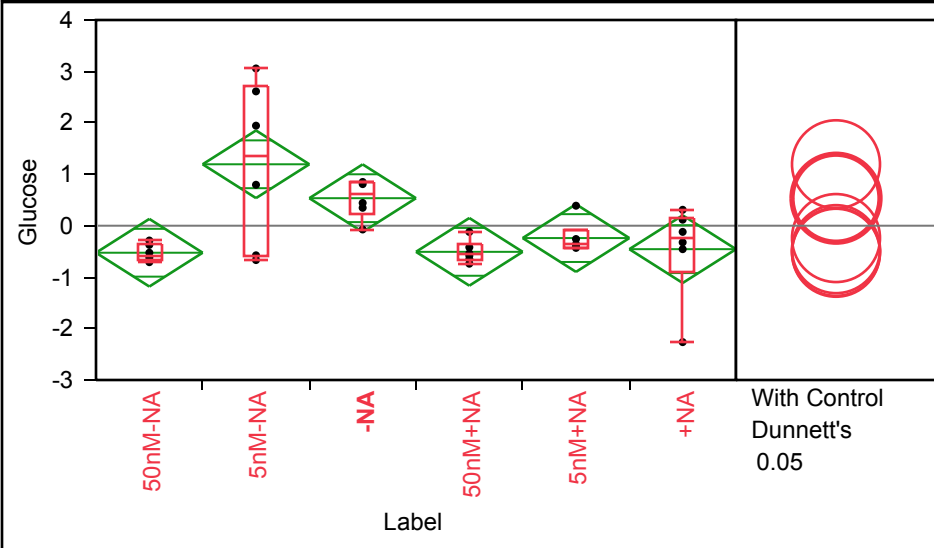

**Quantiles**

| Level   | Minimum  | 10%      | 25%      | Median   | 75%      | 90%      | Maximum  |
|---------|----------|----------|----------|----------|----------|----------|----------|
| 50nM-NA | -0.70892 | -0.70892 | -0.65504 | -0.57261 | -0.35158 | -0.28835 | -0.28835 |
| 5nM-NA  | -0.66795 | -0.66795 | -0.59878 | 1.370437 | 2.7236   | 3.057406 | 3.057406 |
| -NA     | -0.07273 | -0.07273 | 0.243188 | 0.625847 | 0.837046 | 0.850477 | 0.850477 |
| 50nM+NA | -0.7384  | -0.7384  | -0.67263 | -0.55927 | -0.3449  | -0.12101 | -0.12101 |
| 5nM+NA  | -0.43115 | -0.43115 | -0.41412 | -0.36549 | -0.09719 | 0.388833 | 0.388833 |
| +NA     | -2.26345 | -2.26345 | -0.90783 | -0.2218  | 0.165478 | 0.309427 | 0.309427 |

**Oneway Anova**

**Summary of Fit**

|                            |          |
|----------------------------|----------|
| Rsquare                    | 0.446935 |
| Adj Rsquare                | 0.354757 |
| Root Mean Square Error     | 0.788614 |
| Mean of Response           | 2.78e-10 |
| Observations (or Sum Wgts) | 36       |

**Analysis of Variance**

| Source   | DF | Sum of Squares | Mean Square | F Ratio | Prob > F |
|----------|----|----------------|-------------|---------|----------|
| Label    | 5  | 15.077110      | 3.01542     | 4.8486  | 0.0023 * |
| Error    | 30 | 18.657361      | 0.62191     |         |          |
| C. Total | 35 | 33.734471      |             |         |          |

**Means for Oneway Anova**

| Level   | Number | Mean    | Std Error | Lower 95% | Upper 95% |
|---------|--------|---------|-----------|-----------|-----------|
| 50nM-NA | 6      | -0.5254 | 0.32195   | -1.183    | 0.1321    |
| 5nM-NA  | 6      | 1.1945  | 0.32195   | 0.537     | 1.8520    |
| -NA     | 6      | 0.5351  | 0.32195   | -0.122    | 1.1926    |
| 50nM+NA | 6      | -0.5080 | 0.32195   | -1.166    | 0.1495    |
| 5nM+NA  | 6      | -0.2402 | 0.32195   | -0.898    | 0.4174    |
| +NA     | 6      | -0.4560 | 0.32195   | -1.114    | 0.2015    |

Std Error uses a pooled estimate of error variance

**Means Comparisons**

**Comparisons with a control using Dunnett's Method**

**Oneway Analysis of glucose-6-phosphate By Label**

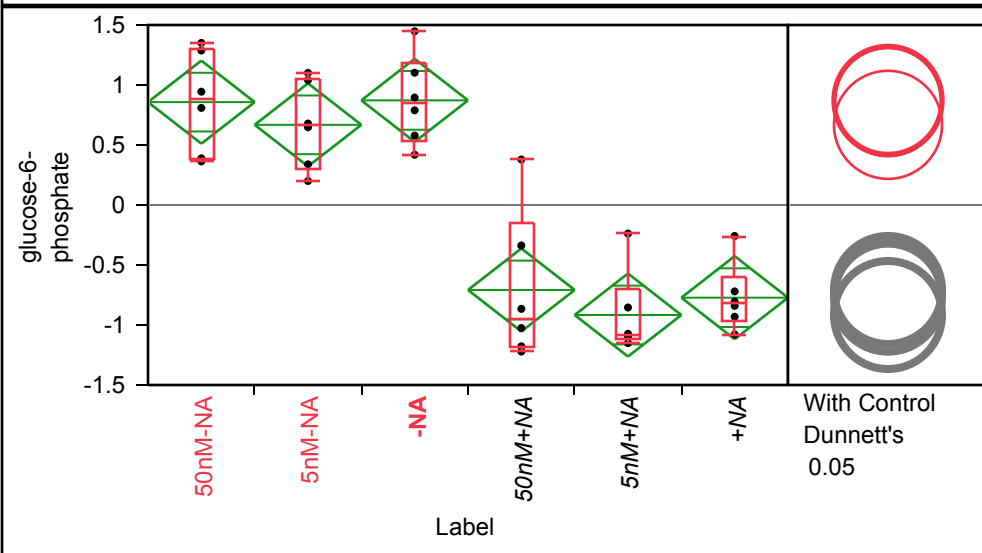

**Quantiles**

| Level   | Minimum  | 10%      | 25%      | Median   | 75%      | 90%      | Maximum  |
|---------|----------|----------|----------|----------|----------|----------|----------|
| 50nM-NA | 0.363238 | 0.363238 | 0.382389 | 0.876824 | 1.303125 | 1.350594 | 1.350594 |
| 5nM-NA  | 0.200033 | 0.200033 | 0.304416 | 0.663292 | 1.055908 | 1.101032 | 1.101032 |
| -NA     | 0.418699 | 0.418699 | 0.538559 | 0.842261 | 1.188711 | 1.447365 | 1.447365 |
| 50nM+NA | -1.22137 | -1.22137 | -1.18855 | -0.94565 | -0.15818 | 0.379149 | 0.379149 |
| 5nM+NA  | -1.15063 | -1.15063 | -1.1153  | -1.07725 | -0.70008 | -0.23784 | -0.23784 |
| +NA     | -1.07905 | -1.07905 | -0.9681  | -0.82268 | -0.60452 | -0.25836 | -0.25836 |

**Oneway Anova**

**Summary of Fit**

|                            |          |
|----------------------------|----------|
| Rsquare                    | 0.818374 |
| Adj Rsquare                | 0.788103 |
| Root Mean Square Error     | 0.414975 |
| Mean of Response           | 5.556e-9 |
| Observations (or Sum Wgts) | 36       |

**Analysis of Variance**

| Source   | DF | Sum of Squares | Mean Square | F Ratio | Prob > F |
|----------|----|----------------|-------------|---------|----------|
| Label    | 5  | 23.277660      | 4.65553     | 27.0350 | <.0001 * |
| Error    | 30 | 5.166121       | 0.17220     |         |          |
| C. Total | 35 | 28.443782      |             |         |          |

**Means for Oneway Anova**

| Level   | Number | Mean     | Std Error | Lower 95% | Upper 95% |
|---------|--------|----------|-----------|-----------|-----------|
| 50nM-NA | 6      | 0.85726  | 0.16941   | 0.511     | 1.203     |
| 5nM-NA  | 6      | 0.66795  | 0.16941   | 0.322     | 1.014     |
| -NA     | 6      | 0.87193  | 0.16941   | 0.526     | 1.218     |
| 50nM+NA | 6      | -0.70807 | 0.16941   | -1.054    | -0.362    |
| 5nM+NA  | 6      | -0.91678 | 0.16941   | -1.263    | -0.571    |
| +NA     | 6      | -0.77230 | 0.16941   | -1.118    | -0.426    |

Std Error uses a pooled estimate of error variance

**Means Comparisons**

**Comparisons with a control using Dunnett's Method**

**Oneway Analysis of glutamate By Label**

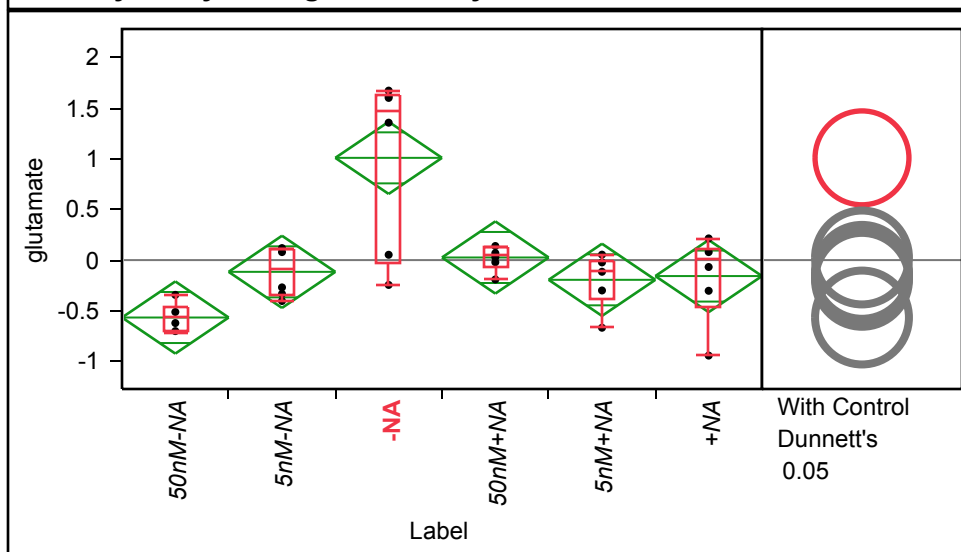

**Quantiles**

| Level   | Minimum  | 10%      | 25%      | Median   | 75%      | 90%      | Maximum  |
|---------|----------|----------|----------|----------|----------|----------|----------|
| 50nM-NA | -0.71118 | -0.71118 | -0.70405 | -0.56747 | -0.4704  | -0.34368 | -0.34368 |
| 5nM-NA  | -0.40437 | -0.40437 | -0.35157 | -0.09526 | 0.114985 | 0.118607 | 0.118607 |
| -NA     | -0.24533 | -0.24533 | -0.02192 | 1.480174 | 1.632984 | 1.674433 | 1.674433 |
| 50nM+NA | -0.19139 | -0.19139 | -0.06375 | 0.048792 | 0.132903 | 0.139191 | 0.139191 |
| 5nM+NA  | -0.66835 | -0.66835 | -0.39212 | -0.11588 | -0.00361 | 0.053795 | 0.053795 |
| +NA     | -0.94353 | -0.94353 | -0.46335 | 0.003628 | 0.112731 | 0.214178 | 0.214178 |

**Oneway Anova**

**Summary of Fit**

|                            |          |
|----------------------------|----------|
| Rsquare                    | 0.608258 |
| Adj Rsquare                | 0.542968 |
| Root Mean Square Error     | 0.427583 |
| Mean of Response           | -8.3e-10 |
| Observations (or Sum Wgts) | 36       |

**Analysis of Variance**

| Source   | DF | Sum of Squares | Mean Square | F Ratio | Prob > F |
|----------|----|----------------|-------------|---------|----------|
| Label    | 5  | 8.516255       | 1.70325     | 9.3162  | <.0001 * |
| Error    | 30 | 5.484804       | 0.18283     |         |          |
| C. Total | 35 | 14.001059      |             |         |          |

**Means for Oneway Anova**

| Level   | Number | Mean    | Std Error | Lower 95% | Upper 95% |
|---------|--------|---------|-----------|-----------|-----------|
| 50nM-NA | 6      | -0.5674 | 0.17456   | -0.9239   | -0.211    |
| 5nM-NA  | 6      | -0.1161 | 0.17456   | -0.4726   | 0.240     |
| -NA     | 6      | 1.0102  | 0.17456   | 0.6537    | 1.367     |
| 50nM+NA | 6      | 0.0258  | 0.17456   | -0.3307   | 0.382     |
| 5nM+NA  | 6      | -0.1949 | 0.17456   | -0.5514   | 0.162     |
| +NA     | 6      | -0.1577 | 0.17456   | -0.5142   | 0.199     |

Std Error uses a pooled estimate of error variance

**Means Comparisons**

**Comparisons with a control using Dunnett's Method**

**Oneway Analysis of glutamine By Label**

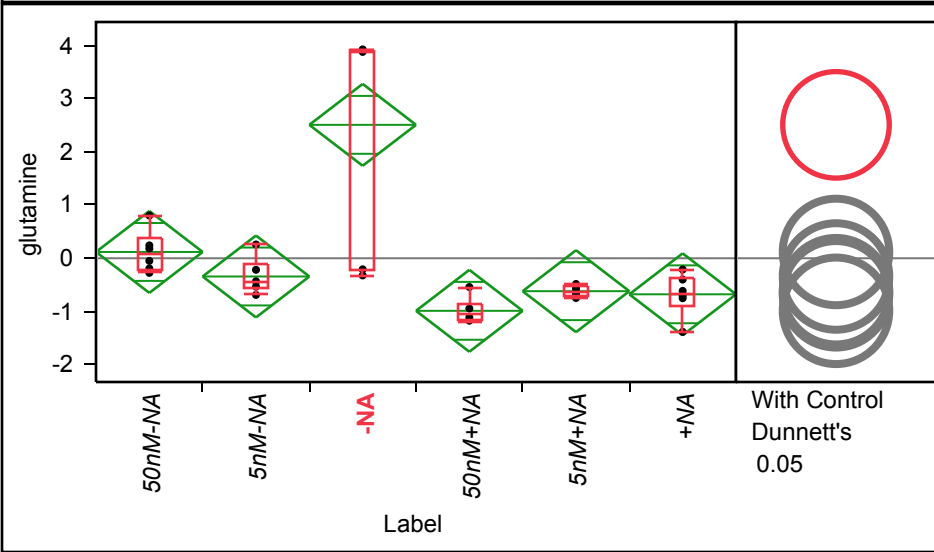

**Quantiles**

| Level   | Minimum  | 10%      | 25%      | Median   | 75%      | 90%      | Maximum  |
|---------|----------|----------|----------|----------|----------|----------|----------|
| 50nM-NA | -0.27393 | -0.27393 | -0.2124  | 0.06586  | 0.382223 | 0.802359 | 0.802359 |
| 5nM-NA  | -0.68747 | -0.68747 | -0.5697  | -0.43754 | -0.0979  | 0.258    | 0.258    |
| -NA     | -0.32165 | -0.32165 | -0.23606 | 3.867905 | 3.901309 | 3.918465 | 3.918465 |
| 50nM+NA | -1.19013 | -1.19013 | -1.17619 | -1.03631 | -0.84185 | -0.5396  | -0.5396  |
| 5nM+NA  | -0.74565 | -0.74565 | -0.71309 | -0.62244 | -0.51838 | -0.48292 | -0.48292 |
| +NA     | -1.3809  | -1.3809  | -0.90706 | -0.65801 | -0.35244 | -0.21188 | -0.21188 |

**Oneway Anova**

**Summary of Fit**

|                            |          |
|----------------------------|----------|
| Rsquare                    | 0.659275 |
| Adj Rsquare                | 0.602488 |
| Root Mean Square Error     | 0.921162 |
| Mean of Response           | 5.56e-10 |
| Observations (or Sum Wgts) | 36       |

**Analysis of Variance**

| Source   | DF | Sum of Squares | Mean Square | F Ratio | Prob > F |
|----------|----|----------------|-------------|---------|----------|
| Label    | 5  | 49.255617      | 9.85112     | 11.6095 | <.0001 * |
| Error    | 30 | 25.456174      | 0.84854     |         |          |
| C. Total | 35 | 74.711791      |             |         |          |

**Means for Oneway Anova**

| Level   | Number | Mean    | Std Error | Lower 95% | Upper 95% |
|---------|--------|---------|-----------|-----------|-----------|
| 50nM-NA | 6      | 0.1184  | 0.37606   | -0.650    | 0.886     |
| 5nM-NA  | 6      | -0.3419 | 0.37606   | -1.110    | 0.426     |
| -NA     | 6      | 2.5034  | 0.37606   | 1.735     | 3.271     |
| 50nM+NA | 6      | -0.9861 | 0.37606   | -1.754    | -0.218    |
| 5nM+NA  | 6      | -0.6176 | 0.37606   | -1.386    | 0.150     |
| +NA     | 6      | -0.6762 | 0.37606   | -1.444    | 0.092     |

Std Error uses a pooled estimate of error variance

**Means Comparisons**

**Comparisons with a control using Dunnett's Method**

**Oneway Analysis of Glutathionedisulfide By Label**

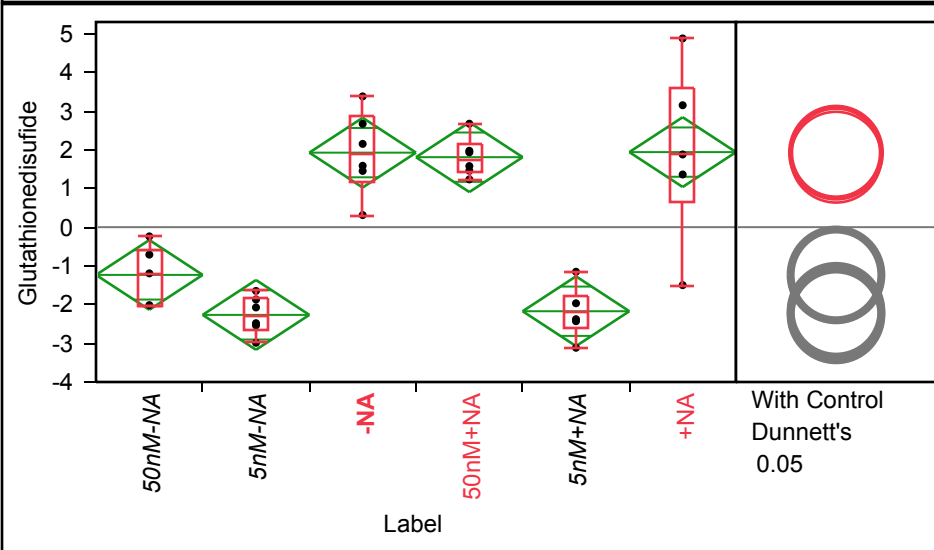

**Quantiles**

| Level   | Minimum  | 10%      | 25%      | Median   | 75%      | 90%      | Maximum  |
|---------|----------|----------|----------|----------|----------|----------|----------|
| 50nM-NA | -2.027   | -2.027   | -2.01739 | -1.2056  | -0.59171 | -0.2382  | -0.2382  |
| 5nM-NA  | -2.98708 | -2.98708 | -2.65039 | -2.27779 | -1.81437 | -1.64682 | -1.64682 |
| -NA     | 0.312319 | 0.312319 | 1.167857 | 1.868264 | 2.84698  | 3.377978 | 3.377978 |
| 50nM+NA | 1.233991 | 1.233991 | 1.401866 | 1.754873 | 2.147729 | 2.672373 | 2.672373 |
| 5nM+NA  | -3.11517 | -3.11517 | -2.6007  | -2.18419 | -1.76299 | -1.15212 | -1.15212 |
| +NA     | -1.49789 | -1.49789 | 0.645958 | 1.87243  | 3.581355 | 4.875277 | 4.875277 |

**Oneway Anova**

**Summary of Fit**

|                            |          |
|----------------------------|----------|
| Rsquare                    | 0.791077 |
| Adj Rsquare                | 0.756257 |
| Root Mean Square Error     | 1.0806   |
| Mean of Response           | -5.56e-9 |
| Observations (or Sum Wgts) | 36       |

**Analysis of Variance**

| Source   | DF | Sum of Squares | Mean Square | F Ratio | Prob > F |
|----------|----|----------------|-------------|---------|----------|
| Label    | 5  | 132.64316      | 26.5286     | 22.7188 | <.0001 * |
| Error    | 30 | 35.03091       | 1.1677      |         |          |
| C. Total | 35 | 167.67407      |             |         |          |

**Means for Oneway Anova**

| Level   | Number | Mean    | Std Error | Lower 95% | Upper 95% |
|---------|--------|---------|-----------|-----------|-----------|
| 50nM-NA | 6      | -1.2334 | 0.44115   | -2.134    | -0.332    |
| 5nM-NA  | 6      | -2.2663 | 0.44115   | -3.167    | -1.365    |
| -NA     | 6      | 1.9250  | 0.44115   | 1.024     | 2.826     |
| 50nM+NA | 6      | 1.8078  | 0.44115   | 0.907     | 2.709     |
| 5nM+NA  | 6      | -2.1719 | 0.44115   | -3.073    | -1.271    |
| +NA     | 6      | 1.9388  | 0.44115   | 1.038     | 2.840     |

Std Error uses a pooled estimate of error variance

**Means Comparisons**

**Comparisons with a control using Dunnett's Method**

**Oneway Analysis of Glutathione By Label**

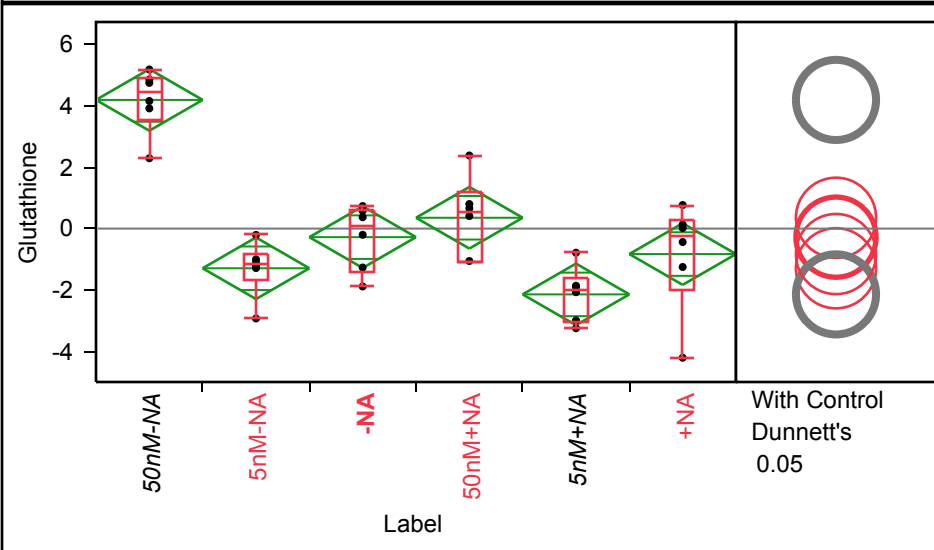

**Quantiles**

| Level   | Minimum  | 10%      | 25%      | Median   | 75%      | 90%      | Maximum  |
|---------|----------|----------|----------|----------|----------|----------|----------|
| 50nM-NA | 2.291961 | 2.291961 | 3.511113 | 4.453618 | 4.940531 | 5.18516  | 5.18516  |
| 5nM-NA  | -2.92972 | -2.92972 | -1.69757 | -1.16762 | -0.80271 | -0.20538 | -0.20538 |
| -NA     | -1.88716 | -1.88716 | -1.4228  | 0.084324 | 0.616606 | 0.734809 | 0.734809 |
| 50nM+NA | -1.07198 | -1.07198 | -1.06095 | 0.532814 | 1.195318 | 2.38212  | 2.38212  |
| 5nM+NA  | -3.24846 | -3.24846 | -3.05783 | -1.98691 | -1.59407 | -0.78659 | -0.78659 |
| +NA     | -4.20943 | -4.20943 | -1.9912  | -0.20985 | 0.29235  | 0.767958 | 0.767958 |

**Oneway Anova**

**Summary of Fit**

|                            |          |
|----------------------------|----------|
| Rsquare                    | 0.7735   |
| Adj Rsquare                | 0.73575  |
| Root Mean Square Error     | 1.203875 |
| Mean of Response           | 9.87e-17 |
| Observations (or Sum Wgts) | 36       |

**Analysis of Variance**

| Source   | DF | Sum of Squares | Mean Square | F Ratio | Prob > F |
|----------|----|----------------|-------------|---------|----------|
| Label    | 5  | 148.48284      | 29.6966     | 20.4901 | <.0001 * |
| Error    | 30 | 43.47942       | 1.4493      |         |          |
| C. Total | 35 | 191.96226      |             |         |          |

**Means for Oneway Anova**

| Level   | Number | Mean    | Std Error | Lower 95% | Upper 95% |
|---------|--------|---------|-----------|-----------|-----------|
| 50nM-NA | 6      | 4.1935  | 0.49148   | 3.190     | 5.197     |
| 5nM-NA  | 6      | -1.2932 | 0.49148   | -2.297    | -0.289    |
| -NA     | 6      | -0.2791 | 0.49148   | -1.283    | 0.725     |
| 50nM+NA | 6      | 0.3530  | 0.49148   | -0.651    | 1.357     |
| 5nM+NA  | 6      | -2.1444 | 0.49148   | -3.148    | -1.141    |
| +NA     | 6      | -0.8299 | 0.49148   | -1.834    | 0.174     |

Std Error uses a pooled estimate of error variance

**Means Comparisons**

**Comparisons with a control using Dunnett's Method**

**Oneway Analysis of Glycerophosphocholine By Label**

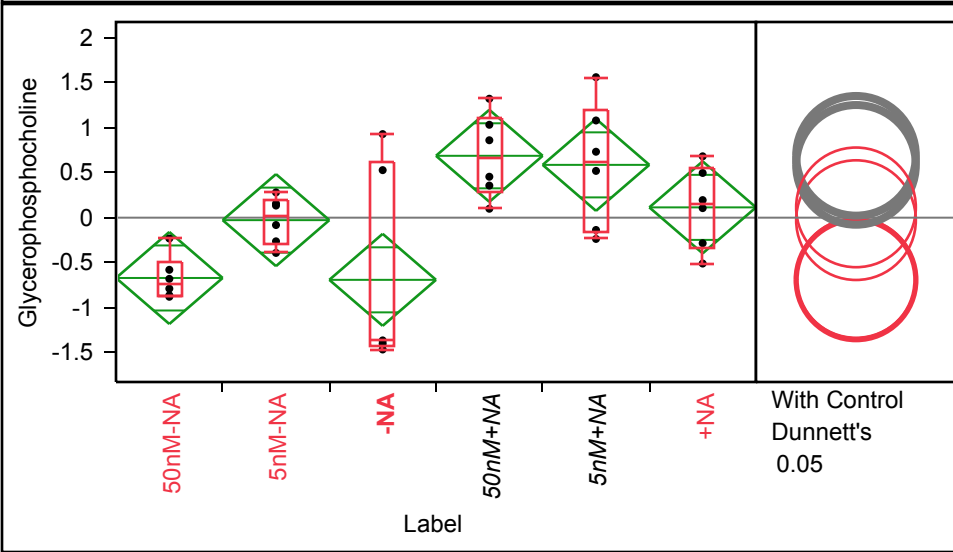

**Quantiles**

| Level   | Minimum  | 10%      | 25%      | Median   | 75%      | 90%      | Maximum  |
|---------|----------|----------|----------|----------|----------|----------|----------|
| 50nM-NA | -0.8792  | -0.8792  | -0.86686 | -0.73449 | -0.49261 | -0.23136 | -0.23136 |
| 5nM-NA  | -0.39173 | -0.39173 | -0.29523 | 0.026328 | 0.187457 | 0.280789 | 0.280789 |
| -NA     | -1.46514 | -1.46514 | -1.41583 | -1.36955 | 0.628447 | 0.928805 | 0.928805 |
| 50nM+NA | 0.099205 | 0.099205 | 0.292258 | 0.657757 | 1.104913 | 1.321896 | 1.321896 |
| 5nM+NA  | -0.23627 | -0.23627 | -0.16176 | 0.626334 | 1.200655 | 1.561521 | 1.561521 |
| +NA     | -0.50983 | -0.50983 | -0.34044 | 0.150648 | 0.543191 | 0.681841 | 0.681841 |

**Oneway Anova**

**Summary of Fit**

|                            |          |
|----------------------------|----------|
| Rsquare                    | 0.48325  |
| Adj Rsquare                | 0.397125 |
| Root Mean Square Error     | 0.613179 |
| Mean of Response           | -2.8e-10 |
| Observations (or Sum Wgts) | 36       |

**Analysis of Variance**

| Source   | DF | Sum of Squares | Mean Square | F Ratio | Prob > F |
|----------|----|----------------|-------------|---------|----------|
| Label    | 5  | 10.548381      | 2.10968     | 5.6110  | 0.0009 * |
| Error    | 30 | 11.279637      | 0.37599     |         |          |
| C. Total | 35 | 21.828018      |             |         |          |

**Means for Oneway Anova**

| Level   | Number | Mean     | Std Error | Lower 95% | Upper 95% |
|---------|--------|----------|-----------|-----------|-----------|
| 50nM-NA | 6      | -0.67033 | 0.25033   | -1.182    | -0.159    |
| 5nM-NA  | 6      | -0.02750 | 0.25033   | -0.539    | 0.484     |
| -NA     | 6      | -0.69108 | 0.25033   | -1.202    | -0.180    |
| 50nM+NA | 6      | 0.68763  | 0.25033   | 0.176     | 1.199     |
| 5nM+NA  | 6      | 0.58689  | 0.25033   | 0.076     | 1.098     |
| +NA     | 6      | 0.11438  | 0.25033   | -0.397    | 0.626     |

Std Error uses a pooled estimate of error variance

**Means Comparisons**

**Comparisons with a control using Dunnnett's Method**

**Oneway Analysis of glycine By Label**

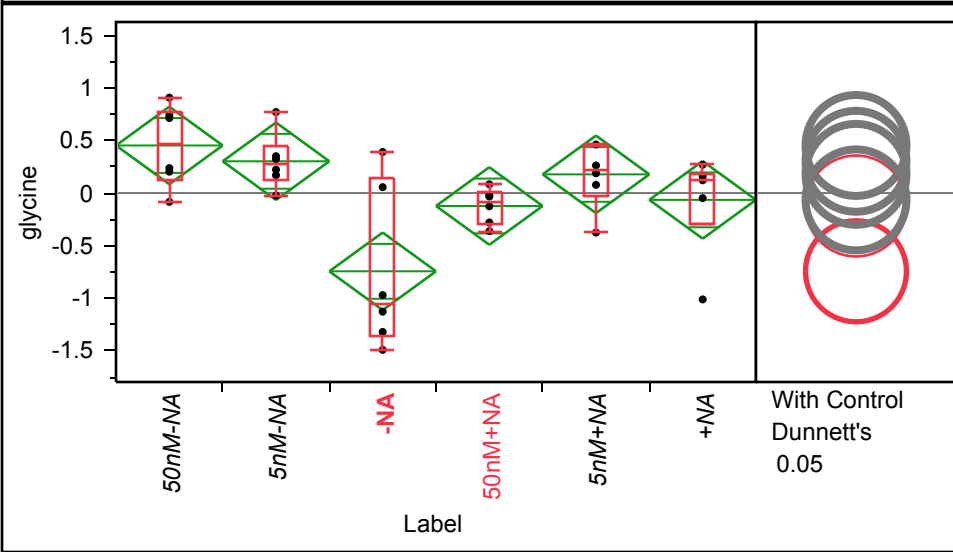

**Quantiles**

| Level   | Minimum  | 10%      | 25%      | Median   | 75%      | 90%      | Maximum  |
|---------|----------|----------|----------|----------|----------|----------|----------|
| 50nM-NA | -0.0837  | -0.0837  | 0.131481 | 0.474619 | 0.779443 | 0.90627  | 0.90627  |
| 5nM-NA  | -0.02348 | -0.02348 | 0.1211   | 0.272628 | 0.454923 | 0.769412 | 0.769412 |
| -NA     | -1.48964 | -1.48964 | -1.36224 | -1.04841 | 0.139235 | 0.389525 | 0.389525 |
| 50nM+NA | -0.36181 | -0.36181 | -0.30046 | -0.07944 | 0.005856 | 0.083247 | 0.083247 |
| 5nM+NA  | -0.3749  | -0.3749  | -0.0355  | 0.22495  | 0.454154 | 0.460549 | 0.460549 |
| +NA     | -1.01049 | -1.01049 | -0.28903 | 0.120895 | 0.186463 | 0.268468 | 0.268468 |

**Oneway Anova**

**Summary of Fit**

|                            |          |
|----------------------------|----------|
| Rsquare                    | 0.479417 |
| Adj Rsquare                | 0.392654 |
| Root Mean Square Error     | 0.441858 |
| Mean of Response           | 5.56e-10 |
| Observations (or Sum Wgts) | 36       |

**Analysis of Variance**

| Source   | DF | Sum of Squares | Mean Square | F Ratio | Prob > F |
|----------|----|----------------|-------------|---------|----------|
| Label    | 5  | 5.394005       | 1.07880     | 5.5255  | 0.0010 * |
| Error    | 30 | 5.857161       | 0.19524     |         |          |
| C. Total | 35 | 11.251166      |             |         |          |

**Means for Oneway Anova**

| Level   | Number | Mean     | Std Error | Lower 95% | Upper 95% |
|---------|--------|----------|-----------|-----------|-----------|
| 50nM-NA | 6      | 0.45203  | 0.18039   | 0.084     | 0.8204    |
| 5nM-NA  | 6      | 0.30176  | 0.18039   | -0.067    | 0.6702    |
| -NA     | 6      | -0.74348 | 0.18039   | -1.112    | -0.3751   |
| 50nM+NA | 6      | -0.12290 | 0.18039   | -0.491    | 0.2455    |
| 5nM+NA  | 6      | 0.17753  | 0.18039   | -0.191    | 0.5459    |
| +NA     | 6      | -0.06494 | 0.18039   | -0.433    | 0.3035    |

Std Error uses a pooled estimate of error variance

**Means Comparisons**

**Comparisons with a control using Dunnett's Method**



**Oneway Analysis of GMP By Label**

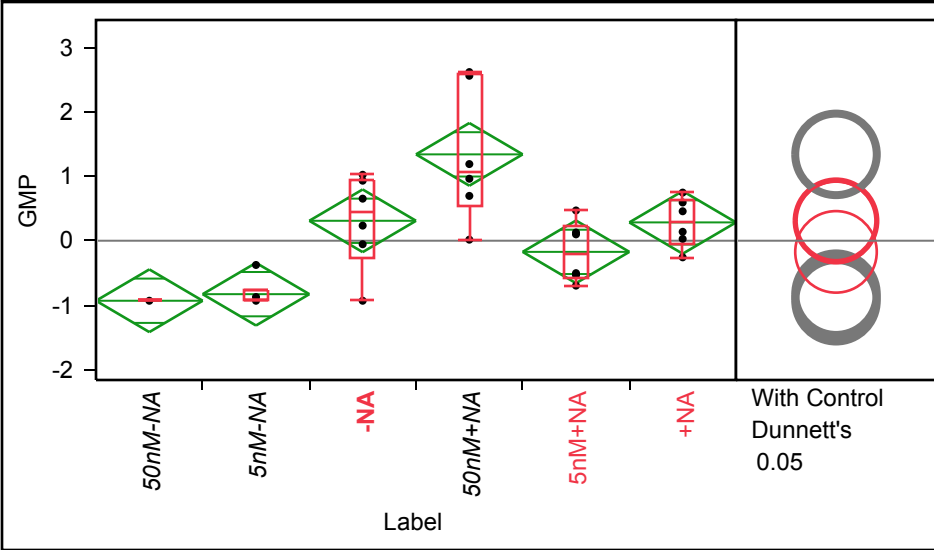

**Quantiles**

| Level   | Minimum  | 10%      | 25%      | Median   | 75%      | 90%      | Maximum  |
|---------|----------|----------|----------|----------|----------|----------|----------|
| 50nM-NA | -0.93246 | -0.93246 | -0.93245 | -0.93244 | -0.93244 | -0.93244 | -0.93244 |
| 5nM-NA  | -0.93245 | -0.93245 | -0.93245 | -0.93244 | -0.75005 | -0.37669 | -0.37669 |
| -NA     | -0.93245 | -0.93245 | -0.27404 | 0.444087 | 0.955556 | 1.02413  | 1.02413  |
| 50nM+NA | 0.016578 | 0.016578 | 0.526376 | 1.076744 | 2.576871 | 2.619646 | 2.619646 |
| 5nM+NA  | -0.69734 | -0.69734 | -0.57535 | -0.20248 | 0.21346  | 0.470014 | 0.470014 |
| +NA     | -0.25783 | -0.25783 | -0.04343 | 0.298047 | 0.632571 | 0.7475   | 0.7475   |

**Oneway Anova**

**Summary of Fit**

|                            |          |
|----------------------------|----------|
| Rsquare                    | 0.676585 |
| Adj Rsquare                | 0.622682 |
| Root Mean Square Error     | 0.5838   |
| Mean of Response           | 8.64e-17 |
| Observations (or Sum Wgts) | 36       |

**Analysis of Variance**

| Source   | DF | Sum of Squares | Mean Square | F Ratio | Prob > F |
|----------|----|----------------|-------------|---------|----------|
| Label    | 5  | 21.389996      | 4.27800     | 12.5520 | <.0001 * |
| Error    | 30 | 10.224664      | 0.34082     |         |          |
| C. Total | 35 | 31.614660      |             |         |          |

**Means for Oneway Anova**

| Level   | Number | Mean    | Std Error | Lower 95% | Upper 95% |
|---------|--------|---------|-----------|-----------|-----------|
| 50nM-NA | 6      | -0.9324 | 0.23834   | -1.419    | -0.446    |
| 5nM-NA  | 6      | -0.8302 | 0.23834   | -1.317    | -0.343    |
| -NA     | 6      | 0.3097  | 0.23834   | -0.177    | 0.796     |
| 50nM+NA | 6      | 1.3414  | 0.23834   | 0.855     | 1.828     |
| 5nM+NA  | 6      | -0.1732 | 0.23834   | -0.660    | 0.314     |
| +NA     | 6      | 0.2847  | 0.23834   | -0.202    | 0.771     |

Std Error uses a pooled estimate of error variance

**Means Comparisons**

**Comparisons with a control using Dunnett's Method**

**Oneway Analysis of Guanidoacetic acid By Label**

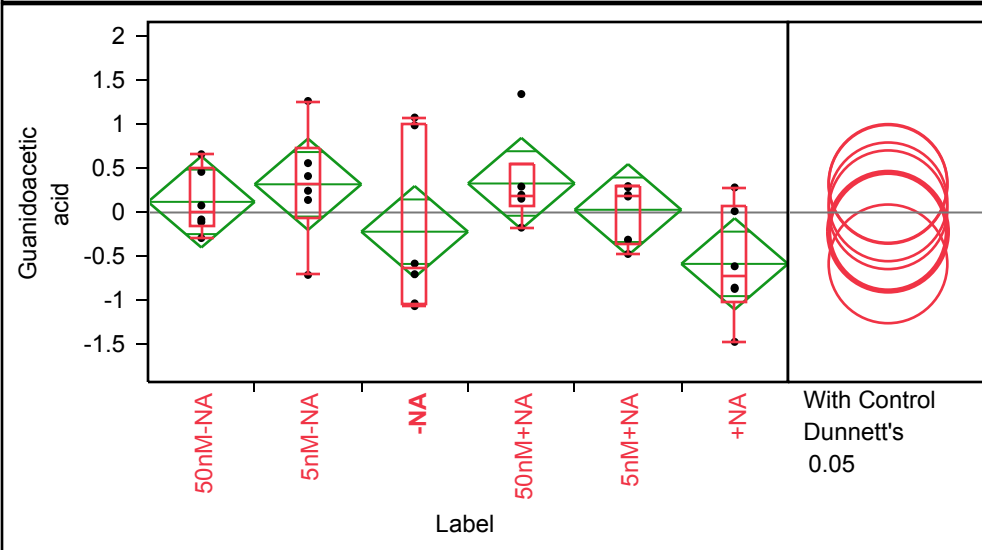

**Quantiles**

| Level   | Minimum  | 10%      | 25%      | Median   | 75%      | 90%      | Maximum  |
|---------|----------|----------|----------|----------|----------|----------|----------|
| 50nM-NA | -0.29067 | -0.29067 | -0.15404 | 0.00022  | 0.512286 | 0.662661 | 0.662661 |
| 5nM-NA  | -0.70971 | -0.70971 | -0.07051 | 0.330772 | 0.738156 | 1.268162 | 1.268162 |
| -NA     | -1.06466 | -1.06466 | -1.04151 | -0.64141 | 1.0136   | 1.080081 | 1.080081 |
| 50nM+NA | -0.17215 | -0.17215 | 0.071861 | 0.17859  | 0.557645 | 1.347148 | 1.347148 |
| 5nM+NA  | -0.47174 | -0.47174 | -0.35004 | 0.189997 | 0.290564 | 0.30002  | 0.30002  |
| +NA     | -1.47141 | -1.47141 | -1.01961 | -0.7331  | 0.082552 | 0.28516  | 0.28516  |

**Oneway Anova**

**Summary of Fit**

|                            |          |
|----------------------------|----------|
| Rsquare                    | 0.241568 |
| Adj Rsquare                | 0.115163 |
| Root Mean Square Error     | 0.622188 |
| Mean of Response           | 5.56e-10 |
| Observations (or Sum Wgts) | 36       |

**Analysis of Variance**

| Source   | DF | Sum of Squares | Mean Square | F Ratio | Prob > F |
|----------|----|----------------|-------------|---------|----------|
| Label    | 5  | 3.699033       | 0.739807    | 1.9111  | 0.1220   |
| Error    | 30 | 11.613541      | 0.387118    |         |          |
| C. Total | 35 | 15.312574      |             |         |          |

**Means for Oneway Anova**

| Level   | Number | Mean     | Std Error | Lower 95% | Upper 95% |
|---------|--------|----------|-----------|-----------|-----------|
| 50nM-NA | 6      | 0.12102  | 0.25401   | -0.398    | 0.6398    |
| 5nM-NA  | 6      | 0.32067  | 0.25401   | -0.198    | 0.8394    |
| -NA     | 6      | -0.21829 | 0.25401   | -0.737    | 0.3005    |
| 50nM+NA | 6      | 0.32998  | 0.25401   | -0.189    | 0.8487    |
| 5nM+NA  | 6      | 0.03103  | 0.25401   | -0.488    | 0.5498    |
| +NA     | 6      | -0.58441 | 0.25401   | -1.103    | -0.0657   |

Std Error uses a pooled estimate of error variance

**Means Comparisons**

**Comparisons with a control using Dunnnett's Method**

**Oneway Analysis of Histidine By Label**

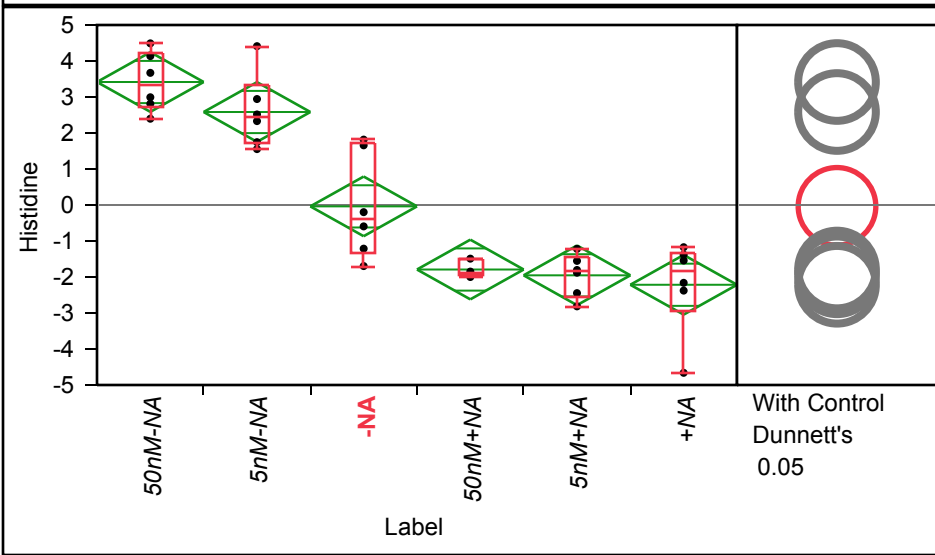

**Quantiles**

| Level   | Minimum  | 10%      | 25%      | Median   | 75%      | 90%      | Maximum  |
|---------|----------|----------|----------|----------|----------|----------|----------|
| 50nM-NA | 2.396812 | 2.396812 | 2.70878  | 3.331554 | 4.22419  | 4.489771 | 4.489771 |
| 5nM-NA  | 1.552602 | 1.552602 | 1.697271 | 2.422843 | 3.310296 | 4.411681 | 4.411681 |
| -NA     | -1.69649 | -1.69649 | -1.33369 | -0.39642 | 1.697261 | 1.816042 | 1.816042 |
| 50nM+NA | -2.00038 | -2.00038 | -1.97109 | -1.90063 | -1.49734 | -1.49038 | -1.49038 |
| 5nM+NA  | -2.81518 | -2.81518 | -2.53983 | -1.84318 | -1.46917 | -1.21841 | -1.21841 |
| +NA     | -4.66148 | -4.66148 | -2.94884 | -1.85183 | -1.32736 | -1.17257 | -1.17257 |

**Oneway Anova**

**Summary of Fit**

|                            |          |
|----------------------------|----------|
| Rsquare                    | 0.859719 |
| Adj Rsquare                | 0.836339 |
| Root Mean Square Error     | 0.99411  |
| Mean of Response           | -2.78e-9 |
| Observations (or Sum Wgts) | 36       |

**Analysis of Variance**

| Source   | DF | Sum of Squares | Mean Square | F Ratio | Prob > F |
|----------|----|----------------|-------------|---------|----------|
| Label    | 5  | 181.69713      | 36.3394     | 36.7713 | <.0001 * |
| Error    | 30 | 29.64763       | 0.9883      |         |          |
| C. Total | 35 | 211.34476      |             |         |          |

**Means for Oneway Anova**

| Level   | Number | Mean    | Std Error | Lower 95% | Upper 95% |
|---------|--------|---------|-----------|-----------|-----------|
| 50nM-NA | 6      | 3.4164  | 0.40584   | 2.588     | 4.245     |
| 5nM-NA  | 6      | 2.5831  | 0.40584   | 1.754     | 3.412     |
| -NA     | 6      | -0.0381 | 0.40584   | -0.867    | 0.791     |
| 50nM+NA | 6      | -1.7922 | 0.40584   | -2.621    | -0.963    |
| 5nM+NA  | 6      | -1.9535 | 0.40584   | -2.782    | -1.125    |
| +NA     | 6      | -2.2158 | 0.40584   | -3.045    | -1.387    |

Std Error uses a pooled estimate of error variance

**Means Comparisons**

**Comparisons with a control using Dunnett's Method**

**Oneway Analysis of homocysteine By Label**

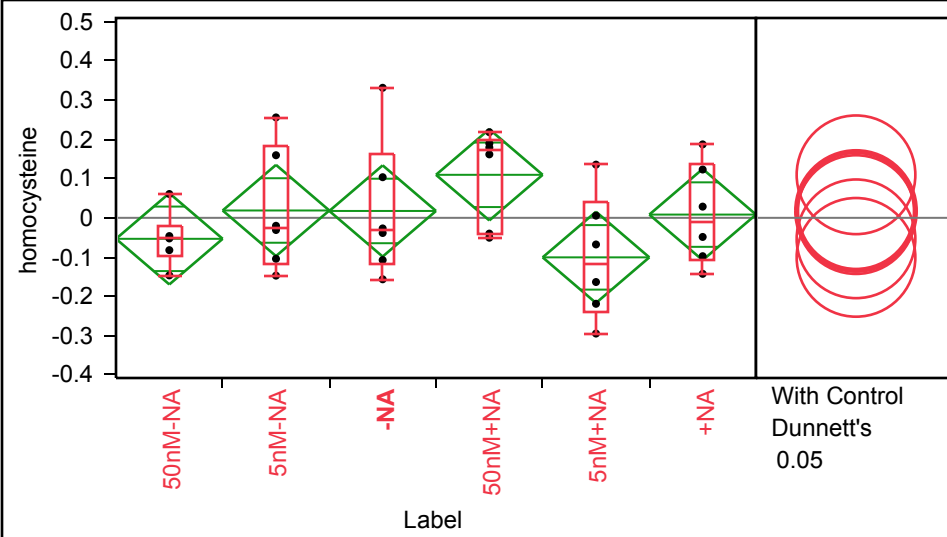

**Quantiles**

| Level   | Minimum  | 10%      | 25%      | Median   | 75%      | 90%      | Maximum  |
|---------|----------|----------|----------|----------|----------|----------|----------|
| 50nM-NA | -0.14661 | -0.14661 | -0.09839 | -0.05292 | -0.01968 | 0.060654 | 0.060654 |
| 5nM-NA  | -0.14717 | -0.14717 | -0.11505 | -0.02564 | 0.183488 | 0.255683 | 0.255683 |
| -NA     | -0.1565  | -0.1565  | -0.11977 | -0.03279 | 0.160391 | 0.331162 | 0.331162 |
| 50nM+NA | -0.0506  | -0.0506  | -0.04278 | 0.170271 | 0.196664 | 0.218087 | 0.218087 |
| 5nM+NA  | -0.29468 | -0.29468 | -0.23783 | -0.11563 | 0.038025 | 0.135448 | 0.135448 |
| +NA     | -0.14258 | -0.14258 | -0.10892 | -0.01006 | 0.139041 | 0.18701  | 0.18701  |

**Oneway Anova**

**Summary of Fit**

|                            |          |
|----------------------------|----------|
| Rsquare                    | 0.209479 |
| Adj Rsquare                | 0.077725 |
| Root Mean Square Error     | 0.139306 |
| Mean of Response           | 2.31e-18 |
| Observations (or Sum Wgts) | 36       |

**Analysis of Variance**

| Source   | DF | Sum of Squares | Mean Square | F Ratio | Prob > F |
|----------|----|----------------|-------------|---------|----------|
| Label    | 5  | 0.15427167     | 0.030854    | 1.5899  | 0.1931   |
| Error    | 30 | 0.58218393     | 0.019406    |         |          |
| C. Total | 35 | 0.73645560     |             |         |          |

**Means for Oneway Anova**

| Level   | Number | Mean     | Std Error | Lower 95% | Upper 95% |
|---------|--------|----------|-----------|-----------|-----------|
| 50nM-NA | 6      | -0.05343 | 0.05687   | -0.1696   | 0.06272   |
| 5nM-NA  | 6      | 0.01872  | 0.05687   | -0.0974   | 0.13486   |
| -NA     | 6      | 0.01751  | 0.05687   | -0.0986   | 0.13365   |
| 50nM+NA | 6      | 0.10956  | 0.05687   | -0.0066   | 0.22571   |
| 5nM+NA  | 6      | -0.10064 | 0.05687   | -0.2168   | 0.01551   |
| +NA     | 6      | 0.00828  | 0.05687   | -0.1079   | 0.12443   |

Std Error uses a pooled estimate of error variance

**Means Comparisons**

**Comparisons with a control using Dunnnett's Method**

**Oneway Analysis of homoserine By Label**

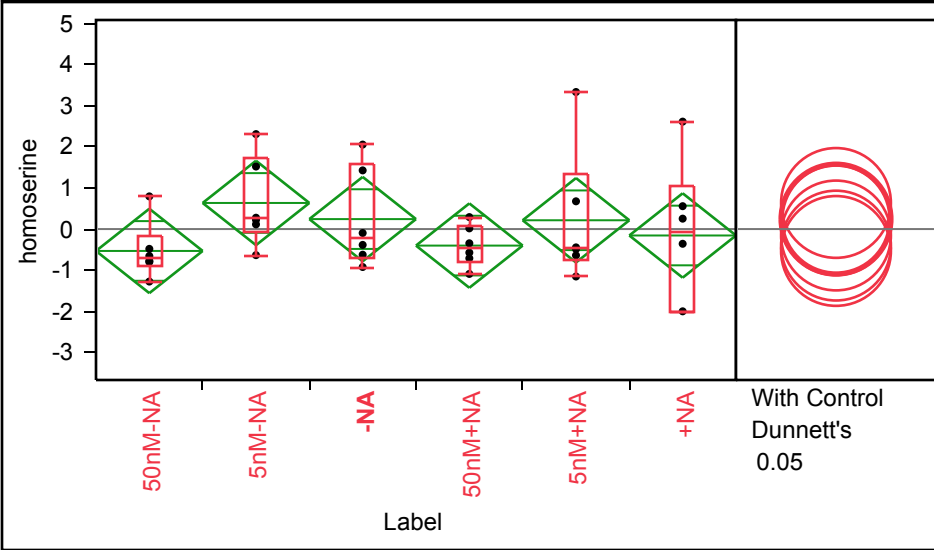

**Quantiles**

| Level   | Minimum  | 10%      | 25%      | Median   | 75%      | 90%      | Maximum  |
|---------|----------|----------|----------|----------|----------|----------|----------|
| 50nM-NA | -1.27796 | -1.27796 | -0.9208  | -0.71518 | -0.1627  | 0.795204 | 0.795204 |
| 5nM-NA  | -0.63496 | -0.63496 | -0.07339 | 0.250005 | 1.719095 | 2.311178 | 2.311178 |
| -NA     | -0.92388 | -0.92388 | -0.69933 | -0.2408  | 1.585252 | 2.055821 | 2.055821 |
| 50nM+NA | -1.09197 | -1.09197 | -0.80649 | -0.4597  | 0.085389 | 0.291284 | 0.291284 |
| 5nM+NA  | -1.1546  | -1.1546  | -0.76882 | -0.46635 | 1.3407   | 3.336053 | 3.336053 |
| +NA     | -2.00254 | -2.00254 | -2.00254 | -0.05258 | 1.071292 | 2.614902 | 2.614902 |

**Oneway Anova**

**Summary of Fit**

|                            |          |
|----------------------------|----------|
| Rsquare                    | 0.114228 |
| Adj Rsquare                | -0.0334  |
| Root Mean Square Error     | 1.231863 |
| Mean of Response           | -2.5e-17 |
| Observations (or Sum Wgts) | 36       |

**Analysis of Variance**

| Source   | DF | Sum of Squares | Mean Square | F Ratio | Prob > F |
|----------|----|----------------|-------------|---------|----------|
| Label    | 5  | 5.870812       | 1.17416     | 0.7738  | 0.5763   |
| Error    | 30 | 45.524611      | 1.51749     |         |          |
| C. Total | 35 | 51.395423      |             |         |          |

**Means for Oneway Anova**

| Level   | Number | Mean     | Std Error | Lower 95% | Upper 95% |
|---------|--------|----------|-----------|-----------|-----------|
| 50nM-NA | 6      | -0.53281 | 0.50291   | -1.560    | 0.4943    |
| 5nM-NA  | 6      | 0.63529  | 0.50291   | -0.392    | 1.6624    |
| -NA     | 6      | 0.24238  | 0.50291   | -0.785    | 1.2694    |
| 50nM+NA | 6      | -0.40244 | 0.50291   | -1.430    | 0.6246    |
| 5nM+NA  | 6      | 0.21402  | 0.50291   | -0.813    | 1.2411    |
| +NA     | 6      | -0.15643 | 0.50291   | -1.184    | 0.8706    |

Std Error uses a pooled estimate of error variance

**Means Comparisons**

**Comparisons with a control using Dunnett's Method**

**Oneway Analysis of Homoserine lacton By Label**

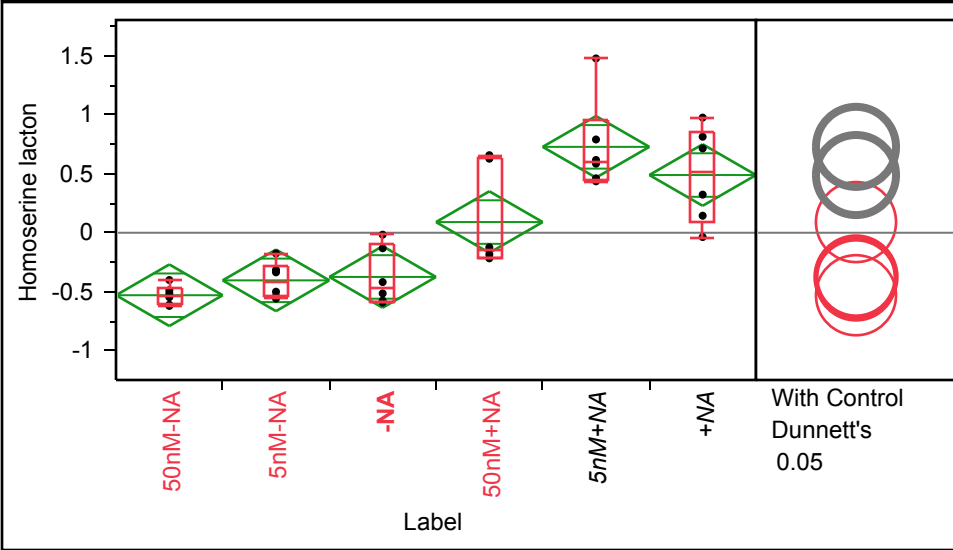

**Quantiles**

| Level   | Minimum  | 10%      | 25%      | Median   | 75%      | 90%      | Maximum  |
|---------|----------|----------|----------|----------|----------|----------|----------|
| 50nM-NA | -0.61904 | -0.61904 | -0.61119 | -0.52901 | -0.46454 | -0.40012 | -0.40012 |
| 5nM-NA  | -0.55673 | -0.55673 | -0.54132 | -0.41702 | -0.27948 | -0.17558 | -0.17558 |
| -NA     | -0.5909  | -0.5909  | -0.57853 | -0.46538 | -0.10251 | -0.01632 | -0.01632 |
| 50nM+NA | -0.21739 | -0.21739 | -0.21667 | -0.1532  | 0.633898 | 0.656158 | 0.656158 |
| 5nM+NA  | 0.435353 | 0.435353 | 0.454057 | 0.600126 | 0.960508 | 1.474697 | 1.474697 |
| +NA     | -0.03644 | -0.03644 | 0.098973 | 0.517953 | 0.852732 | 0.974044 | 0.974044 |

**Oneway Anova**

**Summary of Fit**

|                            |          |
|----------------------------|----------|
| Rsquare                    | 0.735564 |
| Adj Rsquare                | 0.691492 |
| Root Mean Square Error     | 0.312257 |
| Mean of Response           | -8.3e-10 |
| Observations (or Sum Wgts) | 36       |

**Analysis of Variance**

| Source   | DF | Sum of Squares | Mean Square | F Ratio | Prob > F |
|----------|----|----------------|-------------|---------|----------|
| Label    | 5  | 8.136639       | 1.62733     | 16.6898 | <.0001 * |
| Error    | 30 | 2.925125       | 0.09750     |         |          |
| C. Total | 35 | 11.061765      |             |         |          |

**Means for Oneway Anova**

| Level   | Number | Mean     | Std Error | Lower 95% | Upper 95% |
|---------|--------|----------|-----------|-----------|-----------|
| 50nM-NA | 6      | -0.52863 | 0.12748   | -0.7890   | -0.2683   |
| 5nM-NA  | 6      | -0.40277 | 0.12748   | -0.6631   | -0.1424   |
| -NA     | 6      | -0.37394 | 0.12748   | -0.6343   | -0.1136   |
| 50nM+NA | 6      | 0.09040  | 0.12748   | -0.1699   | 0.3507    |
| 5nM+NA  | 6      | 0.72662  | 0.12748   | 0.4663    | 0.9870    |
| +NA     | 6      | 0.48832  | 0.12748   | 0.2280    | 0.7487    |

Std Error uses a pooled estimate of error variance

**Means Comparisons**

**Comparisons with a control using Dunnnett's Method**

**Oneway Analysis of Hydroxyisocaproic acid By Label**

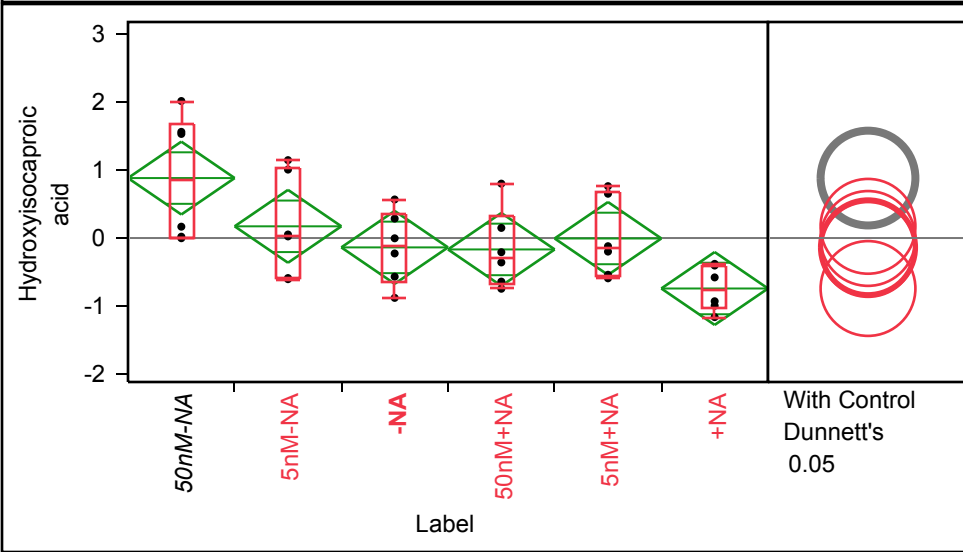

**Quantiles**

| Level   | Minimum  | 10%      | 25%      | Median   | 75%      | 90%      | Maximum  |
|---------|----------|----------|----------|----------|----------|----------|----------|
| 50nM-NA | -0.00278 | -0.00278 | 0.014133 | 0.851967 | 1.681041 | 2.022351 | 2.022351 |
| 5nM-NA  | -0.60731 | -0.60731 | -0.5951  | 0.037873 | 1.045042 | 1.149465 | 1.149465 |
| -NA     | -0.88346 | -0.88346 | -0.64868 | -0.11588 | 0.357721 | 0.568942 | 0.568942 |
| 50nM+NA | -0.74866 | -0.74866 | -0.66973 | -0.285   | 0.312579 | 0.802656 | 0.802656 |
| 5nM+NA  | -0.59454 | -0.59454 | -0.55547 | -0.16044 | 0.681733 | 0.765421 | 0.765421 |
| +NA     | -1.16745 | -1.16745 | -1.04159 | -0.75732 | -0.40004 | -0.38155 | -0.38155 |

**Oneway Anova**

**Summary of Fit**

|                            |          |
|----------------------------|----------|
| Rsquare                    | 0.404951 |
| Adj Rsquare                | 0.305776 |
| Root Mean Square Error     | 0.645013 |
| Mean of Response           | 2.78e-11 |
| Observations (or Sum Wgts) | 36       |

**Analysis of Variance**

| Source   | DF | Sum of Squares | Mean Square | F Ratio | Prob > F |
|----------|----|----------------|-------------|---------|----------|
| Label    | 5  | 8.493919       | 1.69878     | 4.0832  | 0.0060 * |
| Error    | 30 | 12.481271      | 0.41604     |         |          |
| C. Total | 35 | 20.975191      |             |         |          |

**Means for Oneway Anova**

| Level   | Number | Mean     | Std Error | Lower 95% | Upper 95% |
|---------|--------|----------|-----------|-----------|-----------|
| 50nM-NA | 6      | 0.88509  | 0.26333   | 0.347     | 1.423     |
| 5nM-NA  | 6      | 0.17285  | 0.26333   | -0.365    | 0.711     |
| -NA     | 6      | -0.13823 | 0.26333   | -0.676    | 0.400     |
| 50nM+NA | 6      | -0.16837 | 0.26333   | -0.706    | 0.369     |
| 5nM+NA  | 6      | -0.00643 | 0.26333   | -0.544    | 0.531     |
| +NA     | 6      | -0.74491 | 0.26333   | -1.283    | -0.207    |

Std Error uses a pooled estimate of error variance

**Means Comparisons**

**Comparisons with a control using Dunnett's Method**

**Oneway Analysis of Hydroxylamine By Label**

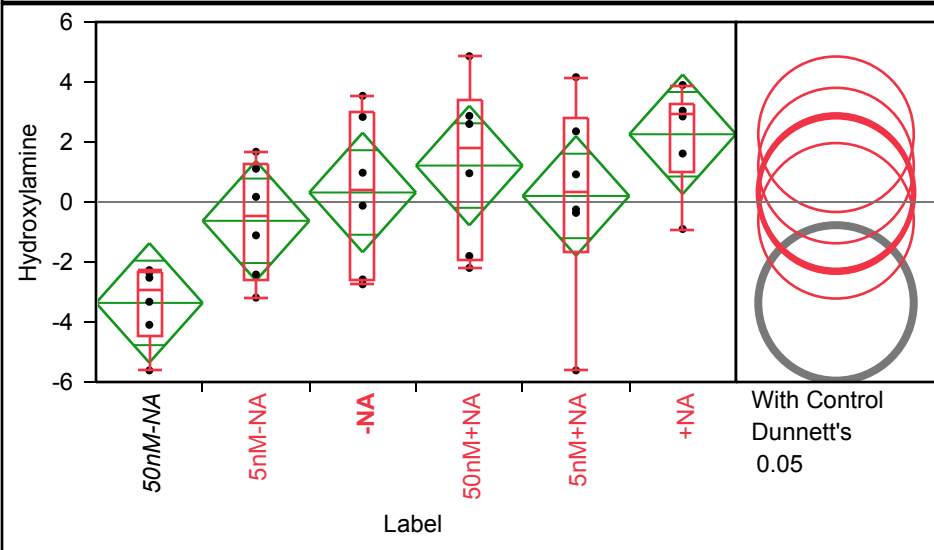

**Quantiles**

| Level   | Minimum  | 10%      | 25%      | Median   | 75%      | 90%      | Maximum  |
|---------|----------|----------|----------|----------|----------|----------|----------|
| 50nM-NA | -5.61278 | -5.61278 | -4.47355 | -2.92529 | -2.33201 | -2.27141 | -2.27141 |
| 5nM-NA  | -3.18794 | -3.18794 | -2.61104 | -0.47017 | 1.249926 | 1.676085 | 1.676085 |
| -NA     | -2.74385 | -2.74385 | -2.62208 | 0.426193 | 3.011292 | 3.538255 | 3.538255 |
| 50nM+NA | -2.19812 | -2.19812 | -1.90011 | 1.778926 | 3.367574 | 4.859246 | 4.859246 |
| 5nM+NA  | -5.61279 | -5.61279 | -1.67494 | 0.333926 | 2.806695 | 4.160799 | 4.160799 |
| +NA     | -0.90069 | -0.90069 | 0.9863   | 2.944526 | 3.256548 | 3.899624 | 3.899624 |

**Oneway Anova**

**Summary of Fit**

|                            |          |
|----------------------------|----------|
| Rsquare                    | 0.392356 |
| Adj Rsquare                | 0.291083 |
| Root Mean Square Error     | 2.38857  |
| Mean of Response           | 8.333e-9 |
| Observations (or Sum Wgts) | 36       |

**Analysis of Variance**

| Source   | DF | Sum of Squares | Mean Square | F Ratio | Prob > F |
|----------|----|----------------|-------------|---------|----------|
| Label    | 5  | 110.51703      | 22.1034     | 3.8742  | 0.0079 * |
| Error    | 30 | 171.15800      | 5.7053      |         |          |
| C. Total | 35 | 281.67503      |             |         |          |

**Means for Oneway Anova**

| Level   | Number | Mean    | Std Error | Lower 95% | Upper 95% |
|---------|--------|---------|-----------|-----------|-----------|
| 50nM-NA | 6      | -3.3635 | 0.97513   | -5.355    | -1.372    |
| 5nM-NA  | 6      | -0.6272 | 0.97513   | -2.619    | 1.364     |
| -NA     | 6      | 0.3168  | 0.97513   | -1.675    | 2.308     |
| 50nM+NA | 6      | 1.2148  | 0.97513   | -0.777    | 3.206     |
| 5nM+NA  | 6      | 0.2015  | 0.97513   | -1.790    | 2.193     |
| +NA     | 6      | 2.2576  | 0.97513   | 0.266     | 4.249     |

Std Error uses a pooled estimate of error variance

**Means Comparisons**

**Comparisons with a control using Dunnett's Method**



**Oneway Analysis of hydroxyproline By Label**

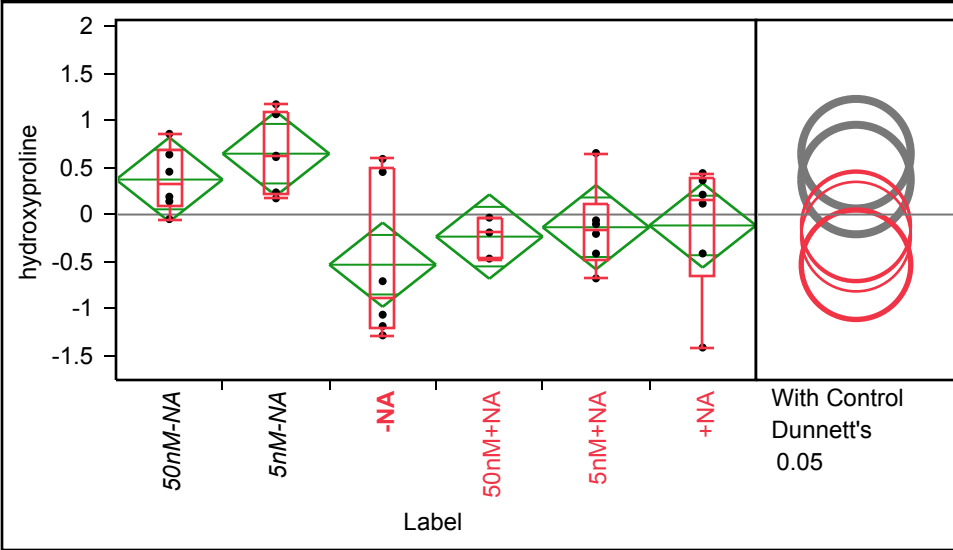

**Quantiles**

| Level   | Minimum  | 10%      | 25%      | Median   | 75%      | 90%      | Maximum  |
|---------|----------|----------|----------|----------|----------|----------|----------|
| 50nM-NA | -0.04847 | -0.04847 | 0.0926   | 0.322093 | 0.692487 | 0.857381 | 0.857381 |
| 5nM-NA  | 0.172243 | 0.172243 | 0.219486 | 0.617522 | 1.092132 | 1.171232 | 1.171232 |
| -NA     | -1.28353 | -1.28353 | -1.20955 | -0.88595 | 0.486795 | 0.590891 | 0.590891 |
| 50nM+NA | -0.47627 | -0.47627 | -0.47019 | -0.19579 | -0.03702 | -0.03311 | -0.03311 |
| 5nM+NA  | -0.67817 | -0.67817 | -0.4803  | -0.15413 | 0.11735  | 0.653481 | 0.653481 |
| +NA     | -1.41274 | -1.41274 | -0.6634  | 0.163305 | 0.382484 | 0.440172 | 0.440172 |

**Oneway Anova**

**Summary of Fit**

|                            |          |
|----------------------------|----------|
| Rsquare                    | 0.391896 |
| Adj Rsquare                | 0.290546 |
| Root Mean Square Error     | 0.536324 |
| Mean of Response           | -2.8e-10 |
| Observations (or Sum Wgts) | 36       |

**Analysis of Variance**

| Source   | DF | Sum of Squares | Mean Square | F Ratio | Prob > F |
|----------|----|----------------|-------------|---------|----------|
| Label    | 5  | 5.561218       | 1.11224     | 3.8667  | 0.0080 * |
| Error    | 30 | 8.629311       | 0.28764     |         |          |
| C. Total | 35 | 14.190530      |             |         |          |

**Means for Oneway Anova**

| Level   | Number | Mean     | Std Error | Lower 95% | Upper 95% |
|---------|--------|----------|-----------|-----------|-----------|
| 50nM-NA | 6      | 0.37171  | 0.21895   | -0.0755   | 0.819     |
| 5nM-NA  | 6      | 0.64659  | 0.21895   | 0.1994    | 1.094     |
| -NA     | 6      | -0.53289 | 0.21895   | -0.9801   | -0.086    |
| 50nM+NA | 6      | -0.23458 | 0.21895   | -0.6817   | 0.213     |
| 5nM+NA  | 6      | -0.13477 | 0.21895   | -0.5819   | 0.312     |
| +NA     | 6      | -0.11605 | 0.21895   | -0.5632   | 0.331     |

Std Error uses a pooled estimate of error variance

**Means Comparisons**

**Comparisons with a control using Dunnnett's Method**

**Oneway Analysis of IDP By Label**

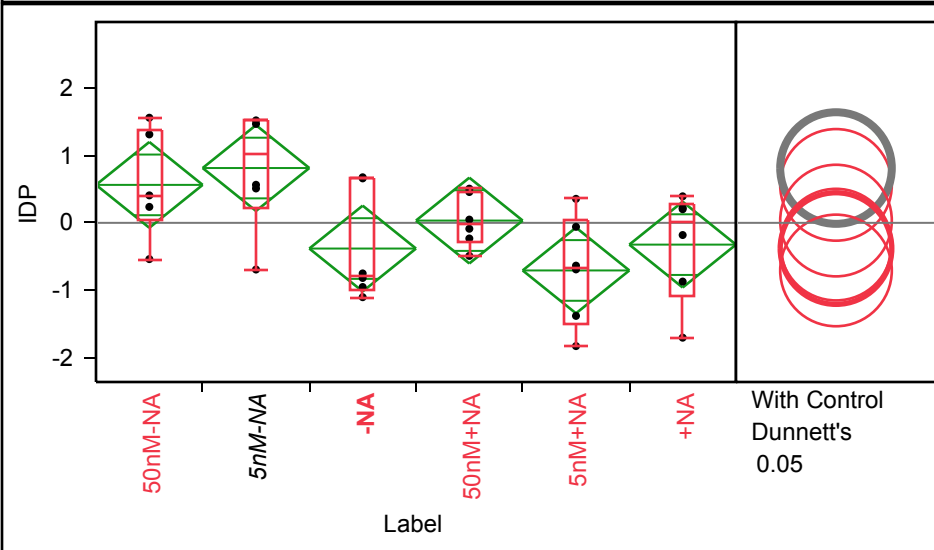

**Quantiles**

| Level   | Minimum  | 10%      | 25%      | Median   | 75%      | 90%      | Maximum  |
|---------|----------|----------|----------|----------|----------|----------|----------|
| 50nM-NA | -0.53759 | -0.53759 | 0.0431   | 0.404236 | 1.373041 | 1.55847  | 1.55847  |
| 5nM-NA  | -0.692   | -0.692   | 0.209356 | 1.015453 | 1.510742 | 1.51925  | 1.51925  |
| -NA     | -1.10205 | -1.10205 | -0.989   | -0.78366 | 0.663555 | 0.675465 | 0.675465 |
| 50nM+NA | -0.48976 | -0.48976 | -0.29627 | -0.01965 | 0.469466 | 0.506616 | 0.506616 |
| 5nM+NA  | -1.82722 | -1.82722 | -1.49128 | -0.66227 | 0.044888 | 0.355884 | 0.355884 |
| +NA     | -1.70237 | -1.70237 | -1.07867 | 0.010763 | 0.264826 | 0.393177 | 0.393177 |

**Oneway Anova**

**Summary of Fit**

|                            |          |
|----------------------------|----------|
| Rsquare                    | 0.372368 |
| Adj Rsquare                | 0.267763 |
| Root Mean Square Error     | 0.762693 |
| Mean of Response           | -2.8e-10 |
| Observations (or Sum Wgts) | 36       |

**Analysis of Variance**

| Source   | DF | Sum of Squares | Mean Square | F Ratio | Prob > F |
|----------|----|----------------|-------------|---------|----------|
| Label    | 5  | 10.353524      | 2.07070     | 3.5597  | 0.0121 * |
| Error    | 30 | 17.450997      | 0.58170     |         |          |
| C. Total | 35 | 27.804521      |             |         |          |

**Means for Oneway Anova**

| Level   | Number | Mean     | Std Error | Lower 95% | Upper 95% |
|---------|--------|----------|-----------|-----------|-----------|
| 50nM-NA | 6      | 0.56287  | 0.31137   | -0.073    | 1.199     |
| 5nM-NA  | 6      | 0.81264  | 0.31137   | 0.177     | 1.449     |
| -NA     | 6      | -0.38094 | 0.31137   | -1.017    | 0.255     |
| 50nM+NA | 6      | 0.03381  | 0.31137   | -0.602    | 0.670     |
| 5nM+NA  | 6      | -0.70566 | 0.31137   | -1.342    | -0.070    |
| +NA     | 6      | -0.32273 | 0.31137   | -0.959    | 0.313     |

Std Error uses a pooled estimate of error variance

**Means Comparisons**

**Comparisons with a control using Dunnett's Method**

**Oneway Analysis of Imidazoleacetic acid By Label**

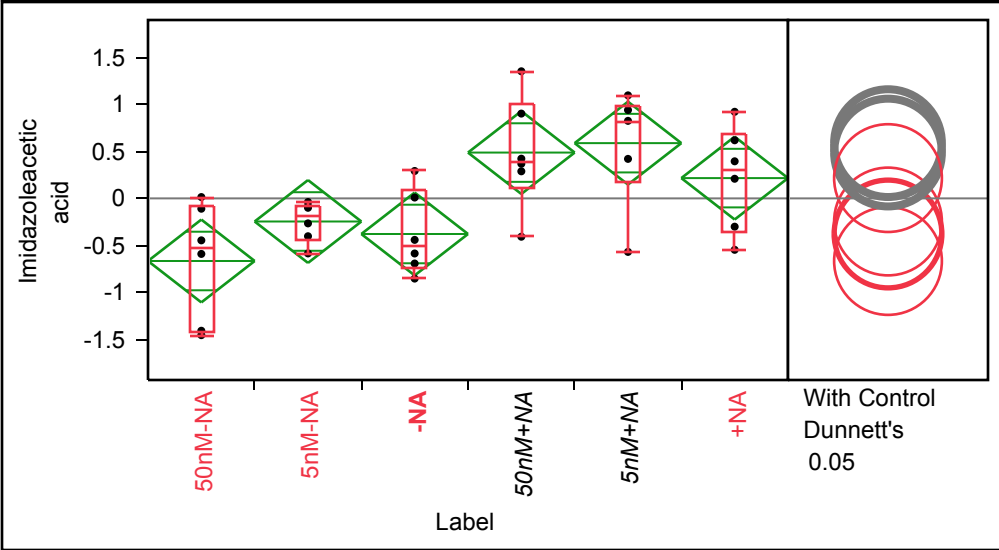

**Quantiles**

| Level   | Minimum  | 10%      | 25%      | Median   | 75%      | 90%      | Maximum  |
|---------|----------|----------|----------|----------|----------|----------|----------|
| 50nM-NA | -1.45674 | -1.45674 | -1.42161 | -0.5193  | -0.07912 | 0.014014 | 0.014014 |
| 5nM-NA  | -0.58616 | -0.58616 | -0.44895 | -0.18325 | -0.07175 | -0.03864 | -0.03864 |
| -NA     | -0.85429 | -0.85429 | -0.73388 | -0.51441 | 0.079695 | 0.291872 | 0.291872 |
| 50nM+NA | -0.40837 | -0.40837 | 0.114189 | 0.395688 | 1.01571  | 1.353559 | 1.353559 |
| 5nM+NA  | -0.57002 | -0.57002 | 0.172999 | 0.820869 | 0.98005  | 1.097334 | 1.097334 |
| +NA     | -0.54773 | -0.54773 | -0.363   | 0.30193  | 0.694785 | 0.922346 | 0.922346 |

**Oneway Anova**

**Summary of Fit**

|                            |          |
|----------------------------|----------|
| Rsquare                    | 0.477764 |
| Adj Rsquare                | 0.390724 |
| Root Mean Square Error     | 0.529061 |
| Mean of Response           | -2.8e-11 |
| Observations (or Sum Wgts) | 36       |

**Analysis of Variance**

| Source   | DF | Sum of Squares | Mean Square | F Ratio | Prob > F |
|----------|----|----------------|-------------|---------|----------|
| Label    | 5  | 7.682079       | 1.53642     | 5.4891  | 0.0011 * |
| Error    | 30 | 8.397162       | 0.27991     |         |          |
| C. Total | 35 | 16.079241      |             |         |          |

**Means for Oneway Anova**

| Level   | Number | Mean     | Std Error | Lower 95% | Upper 95% |
|---------|--------|----------|-----------|-----------|-----------|
| 50nM-NA | 6      | -0.66690 | 0.21599   | -1.108    | -0.226    |
| 5nM-NA  | 6      | -0.24622 | 0.21599   | -0.687    | 0.195     |
| -NA     | 6      | -0.37933 | 0.21599   | -0.820    | 0.062     |
| 50nM+NA | 6      | 0.48801  | 0.21599   | 0.047     | 0.929     |
| 5nM+NA  | 6      | 0.58845  | 0.21599   | 0.147     | 1.030     |
| +NA     | 6      | 0.21600  | 0.21599   | -0.225    | 0.657     |

Std Error uses a pooled estimate of error variance

**Means Comparisons**

**Comparisons with a control using Dunnett's Method**

**Oneway Analysis of IMP By Label**

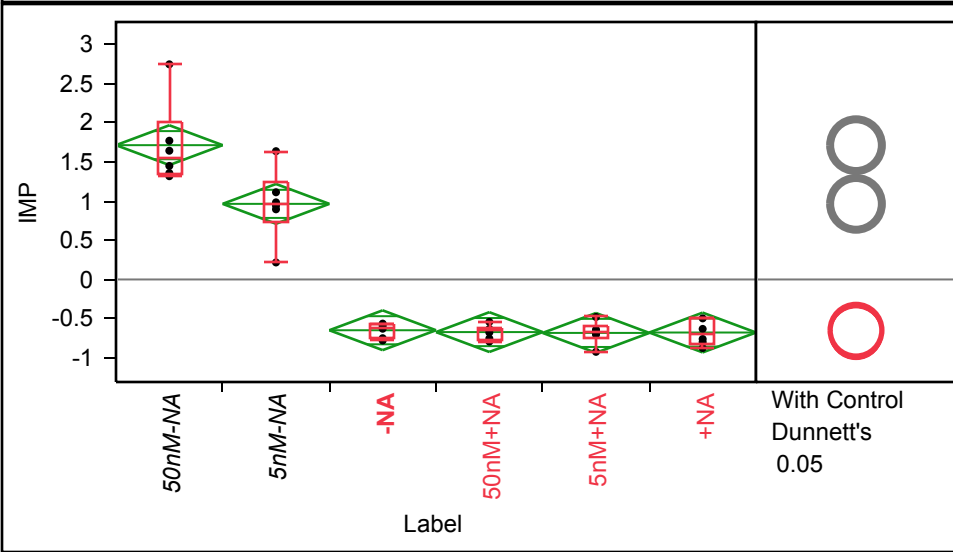

**Quantiles**

| Level   | Minimum  | 10%      | 25%      | Median   | 75%      | 90%      | Maximum  |
|---------|----------|----------|----------|----------|----------|----------|----------|
| 50nM-NA | 1.319122 | 1.319122 | 1.349115 | 1.547533 | 2.016059 | 2.748199 | 2.748199 |
| 5nM-NA  | 0.217359 | 0.217359 | 0.726491 | 0.963936 | 1.245102 | 1.638748 | 1.638748 |
| -NA     | -0.77963 | -0.77963 | -0.75778 | -0.61065 | -0.57346 | -0.5641  | -0.5641  |
| 50nM+NA | -0.79305 | -0.79305 | -0.76437 | -0.65512 | -0.60978 | -0.54225 | -0.54225 |
| 5nM+NA  | -0.92439 | -0.92439 | -0.75948 | -0.67411 | -0.60001 | -0.47938 | -0.47938 |
| +NA     | -0.8755  | -0.8755  | -0.81852 | -0.69585 | -0.5011  | -0.49692 | -0.49692 |

**Oneway Anova**

**Summary of Fit**

|                            |          |
|----------------------------|----------|
| Rsquare                    | 0.924426 |
| Adj Rsquare                | 0.91183  |
| Root Mean Square Error     | 0.304579 |
| Mean of Response           | 5.556e-9 |
| Observations (or Sum Wgts) | 36       |

**Analysis of Variance**

| Source   | DF | Sum of Squares | Mean Square | F Ratio | Prob > F |
|----------|----|----------------|-------------|---------|----------|
| Label    | 5  | 34.042445      | 6.80849     | 73.3924 | <.0001 * |
| Error    | 30 | 2.783049       | 0.09277     |         |          |
| C. Total | 35 | 36.825494      |             |         |          |

**Means for Oneway Anova**

| Level   | Number | Mean    | Std Error | Lower 95% | Upper 95% |
|---------|--------|---------|-----------|-----------|-----------|
| 50nM-NA | 6      | 1.7156  | 0.12434   | 1.462     | 1.970     |
| 5nM-NA  | 6      | 0.9657  | 0.12434   | 0.712     | 1.220     |
| -NA     | 6      | -0.6487 | 0.12434   | -0.903    | -0.395    |
| 50nM+NA | 6      | -0.6721 | 0.12434   | -0.926    | -0.418    |
| 5nM+NA  | 6      | -0.6828 | 0.12434   | -0.937    | -0.429    |
| +NA     | 6      | -0.6777 | 0.12434   | -0.932    | -0.424    |

Std Error uses a pooled estimate of error variance

**Means Comparisons**

**Comparisons with a control using Dunnett's Method**

**Oneway Analysis of indole By Label**

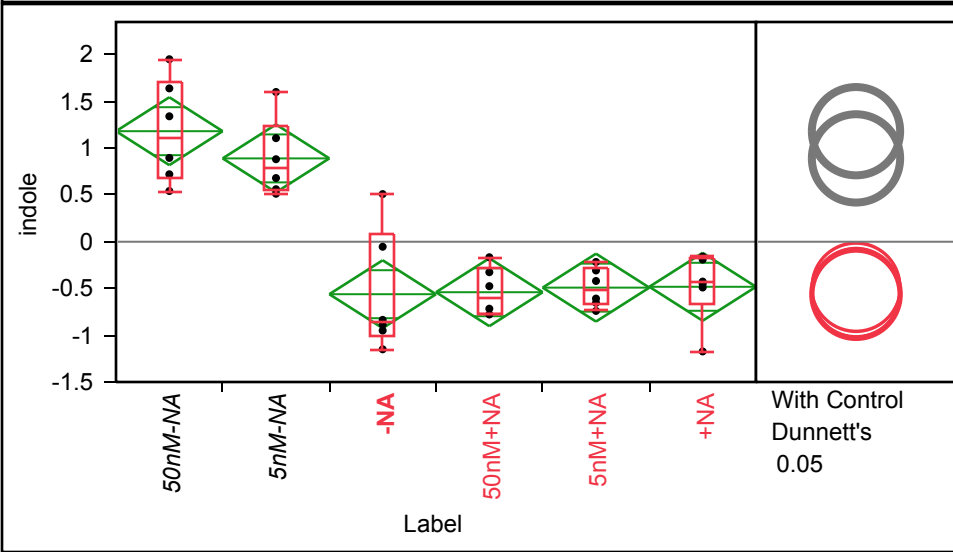

**Quantiles**

| Level   | Minimum  | 10%      | 25%      | Median   | 75%      | 90%      | Maximum  |
|---------|----------|----------|----------|----------|----------|----------|----------|
| 50nM-NA | 0.542338 | 0.542338 | 0.676643 | 1.118914 | 1.717934 | 1.95176  | 1.95176  |
| 5nM-NA  | 0.513309 | 0.513309 | 0.549498 | 0.781787 | 1.231237 | 1.601443 | 1.601443 |
| -NA     | -1.15028 | -1.15028 | -1.00011 | -0.86122 | 0.087187 | 0.509632 | 0.509632 |
| 50nM+NA | -0.77843 | -0.77843 | -0.77804 | -0.59559 | -0.28589 | -0.16577 | -0.16577 |
| 5nM+NA  | -0.73998 | -0.73998 | -0.67483 | -0.51375 | -0.28455 | -0.21645 | -0.21645 |
| +NA     | -1.17314 | -1.17314 | -0.66034 | -0.43906 | -0.18279 | -0.15956 | -0.15956 |

**Oneway Anova**

**Summary of Fit**

|                            |          |
|----------------------------|----------|
| Rsquare                    | 0.775472 |
| Adj Rsquare                | 0.73805  |
| Root Mean Square Error     | 0.435239 |
| Mean of Response           | -2.8e-10 |
| Observations (or Sum Wgts) | 36       |

**Analysis of Variance**

| Source   | DF | Sum of Squares | Mean Square | F Ratio | Prob > F |
|----------|----|----------------|-------------|---------|----------|
| Label    | 5  | 19.627760      | 3.92555     | 20.7227 | <.0001 * |
| Error    | 30 | 5.682980       | 0.18943     |         |          |
| C. Total | 35 | 25.310741      |             |         |          |

**Means for Oneway Anova**

| Level   | Number | Mean    | Std Error | Lower 95% | Upper 95% |
|---------|--------|---------|-----------|-----------|-----------|
| 50nM-NA | 6      | 1.1822  | 0.17769   | 0.8193    | 1.545     |
| 5nM-NA  | 6      | 0.8913  | 0.17769   | 0.5284    | 1.254     |
| -NA     | 6      | -0.5611 | 0.17769   | -0.9240   | -0.198    |
| 50nM+NA | 6      | -0.5399 | 0.17769   | -0.9028   | -0.177    |
| 5nM+NA  | 6      | -0.4907 | 0.17769   | -0.8536   | -0.128    |
| +NA     | 6      | -0.4818 | 0.17769   | -0.8447   | -0.119    |

Std Error uses a pooled estimate of error variance

**Means Comparisons**

**Comparisons with a control using Dunnett's Method**

**Oneway Analysis of Indoleacrylic acid By Label**

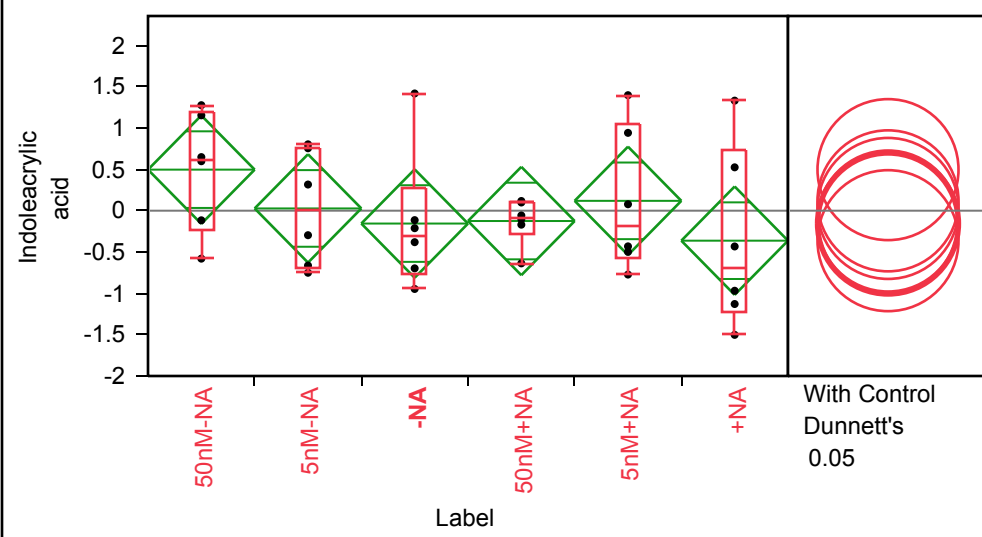

**Quantiles**

| Level   | Minimum  | 10%      | 25%      | Median   | 75%      | 90%      | Maximum  |
|---------|----------|----------|----------|----------|----------|----------|----------|
| 50nM-NA | -0.58008 | -0.58008 | -0.23229 | 0.623404 | 1.184442 | 1.276514 | 1.276514 |
| 5nM-NA  | -0.75086 | -0.75086 | -0.68527 | 0.01     | 0.767273 | 0.80288  | 0.80288  |
| -NA     | -0.94702 | -0.94702 | -0.75992 | -0.29633 | 0.268894 | 1.418125 | 1.418125 |
| 50nM+NA | -0.63739 | -0.63739 | -0.28621 | -0.07988 | 0.103711 | 0.117284 | 0.117284 |
| 5nM+NA  | -0.77274 | -0.77274 | -0.56642 | -0.17682 | 1.055661 | 1.397441 | 1.397441 |
| +NA     | -1.50219 | -1.50219 | -1.22241 | -0.70072 | 0.726347 | 1.331446 | 1.331446 |

**Oneway Anova**

**Summary of Fit**

|                            |          |
|----------------------------|----------|
| Rsquare                    | 0.122894 |
| Adj Rsquare                | -0.02329 |
| Root Mean Square Error     | 0.78632  |
| Mean of Response           | 2.78e-10 |
| Observations (or Sum Wgts) | 36       |

**Analysis of Variance**

| Source   | DF | Sum of Squares | Mean Square | F Ratio | Prob > F |
|----------|----|----------------|-------------|---------|----------|
| Label    | 5  | 2.598955       | 0.519791    | 0.8407  | 0.5316   |
| Error    | 30 | 18.548952      | 0.618298    |         |          |
| C. Total | 35 | 21.147907      |             |         |          |

**Means for Oneway Anova**

| Level   | Number | Mean     | Std Error | Lower 95% | Upper 95% |
|---------|--------|----------|-----------|-----------|-----------|
| 50nM-NA | 6      | 0.49677  | 0.32101   | -0.159    | 1.1524    |
| 5nM-NA  | 6      | 0.02734  | 0.32101   | -0.628    | 0.6829    |
| -NA     | 6      | -0.15555 | 0.32101   | -0.811    | 0.5000    |
| 50nM+NA | 6      | -0.12497 | 0.32101   | -0.781    | 0.5306    |
| 5nM+NA  | 6      | 0.11919  | 0.32101   | -0.536    | 0.7748    |
| +NA     | 6      | -0.36278 | 0.32101   | -1.018    | 0.2928    |

Std Error uses a pooled estimate of error variance

**Means Comparisons**

**Comparisons with a control using Dunnett's Method**

**Oneway Analysis of inosine By Label**

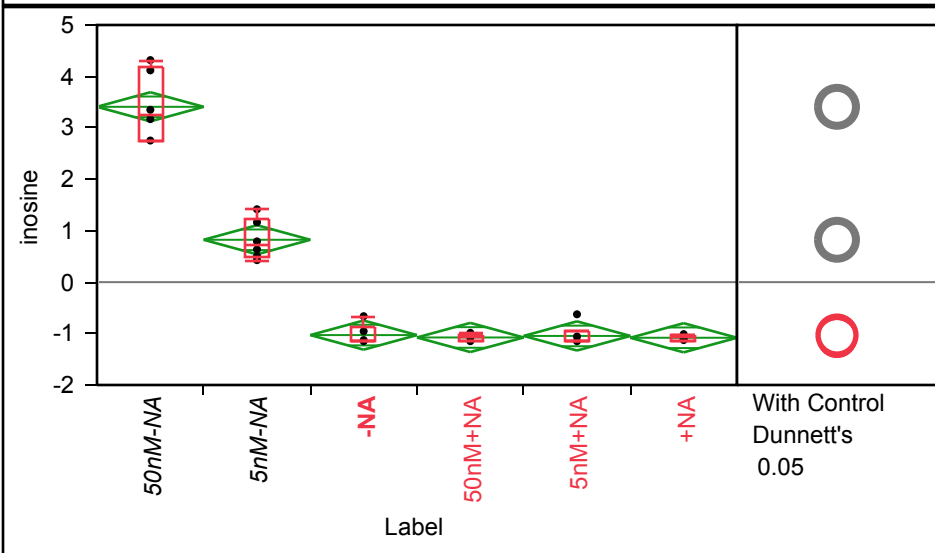

**Quantiles**

| Level   | Minimum  | 10%      | 25%      | Median   | 75%      | 90%      | Maximum  |
|---------|----------|----------|----------|----------|----------|----------|----------|
| 50nM-NA | 2.746018 | 2.746018 | 2.751375 | 3.259972 | 4.168089 | 4.317371 | 4.317371 |
| 5nM-NA  | 0.42804  | 0.42804  | 0.485527 | 0.713905 | 1.227562 | 1.417477 | 1.417477 |
| -NA     | -1.14846 | -1.14846 | -1.14846 | -1.13176 | -0.88133 | -0.66221 | -0.66221 |
| 50nM+NA | -1.14847 | -1.14847 | -1.14847 | -1.06416 | -1.02942 | -0.98535 | -0.98535 |
| 5nM+NA  | -1.14848 | -1.14848 | -1.14847 | -1.14847 | -0.94906 | -0.62528 | -0.62528 |
| +NA     | -1.14065 | -1.14065 | -1.13002 | -1.08223 | -1.03771 | -1.01104 | -1.01104 |

**Oneway Anova**

**Summary of Fit**

|                            |          |
|----------------------------|----------|
| Rsquare                    | 0.966742 |
| Adj Rsquare                | 0.961199 |
| Root Mean Square Error     | 0.339802 |
| Mean of Response           | -2.78e-9 |
| Observations (or Sum Wgts) | 36       |

**Analysis of Variance**

| Source   | DF | Sum of Squares | Mean Square | F Ratio  | Prob > F |
|----------|----|----------------|-------------|----------|----------|
| Label    | 5  | 100.69078      | 20.1382     | 174.4091 | <.0001 * |
| Error    | 30 | 3.46395        | 0.1155      |          |          |
| C. Total | 35 | 104.15474      |             |          |          |

**Means for Oneway Anova**

| Level   | Number | Mean    | Std Error | Lower 95% | Upper 95% |
|---------|--------|---------|-----------|-----------|-----------|
| 50nM-NA | 6      | 3.4091  | 0.13872   | 3.126     | 3.692     |
| 5nM-NA  | 6      | 0.8237  | 0.13872   | 0.540     | 1.107     |
| -NA     | 6      | -1.0295 | 0.13872   | -1.313    | -0.746    |
| 50nM+NA | 6      | -1.0758 | 0.13872   | -1.359    | -0.792    |
| 5nM+NA  | 6      | -1.0460 | 0.13872   | -1.329    | -0.763    |
| +NA     | 6      | -1.0815 | 0.13872   | -1.365    | -0.798    |

Std Error uses a pooled estimate of error variance

**Means Comparisons**

**Comparisons with a control using Dunnett's Method**

**Oneway Analysis of isocitrate By Label**

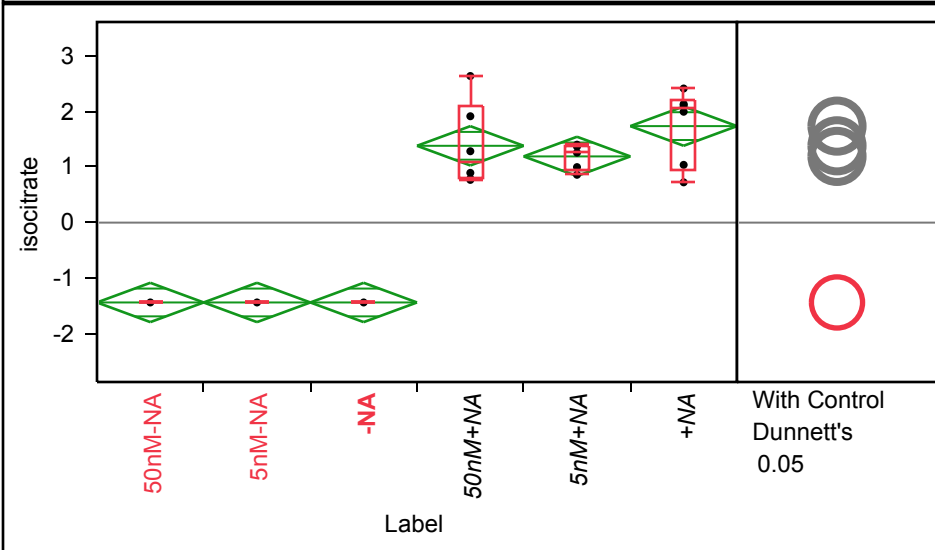

**Quantiles**

| Level   | Minimum  | 10%      | 25%      | Median   | 75%      | 90%      | Maximum  |
|---------|----------|----------|----------|----------|----------|----------|----------|
| 50nM-NA | -1.43268 | -1.43268 | -1.43268 | -1.43267 | -1.43267 | -1.43267 | -1.43267 |
| 5nM-NA  | -1.43268 | -1.43268 | -1.43268 | -1.43267 | -1.43267 | -1.43267 | -1.43267 |
| -NA     | -1.43269 | -1.43269 | -1.43268 | -1.43268 | -1.43268 | -1.43268 | -1.43268 |
| 50nM+NA | 0.766892 | 0.766892 | 0.784323 | 1.086777 | 2.089284 | 2.630685 | 2.630685 |
| 5nM+NA  | 0.858347 | 0.858347 | 0.961569 | 1.255465 | 1.373101 | 1.398595 | 1.398595 |
| +NA     | 0.722842 | 0.722842 | 0.957997 | 2.04764  | 2.198102 | 2.406506 | 2.406506 |

**Oneway Anova**

**Summary of Fit**

|                            |          |
|----------------------------|----------|
| Rsquare                    | 0.933073 |
| Adj Rsquare                | 0.921918 |
| Root Mean Square Error     | 0.422911 |
| Mean of Response           | 9.87e-17 |
| Observations (or Sum Wgts) | 36       |

**Analysis of Variance**

| Source   | DF | Sum of Squares | Mean Square | F Ratio | Prob > F |
|----------|----|----------------|-------------|---------|----------|
| Label    | 5  | 74.805056      | 14.9610     | 83.6495 | <.0001 * |
| Error    | 30 | 5.365606       | 0.1789      |         |          |
| C. Total | 35 | 80.170662      |             |         |          |

**Means for Oneway Anova**

| Level   | Number | Mean    | Std Error | Lower 95% | Upper 95% |
|---------|--------|---------|-----------|-----------|-----------|
| 50nM-NA | 6      | -1.4327 | 0.17265   | -1.785    | -1.080    |
| 5nM-NA  | 6      | -1.4327 | 0.17265   | -1.785    | -1.080    |
| -NA     | 6      | -1.4327 | 0.17265   | -1.785    | -1.080    |
| 50nM+NA | 6      | 1.3783  | 0.17265   | 1.026     | 1.731     |
| 5nM+NA  | 6      | 1.1881  | 0.17265   | 0.835     | 1.541     |
| +NA     | 6      | 1.7316  | 0.17265   | 1.379     | 2.084     |

Std Error uses a pooled estimate of error variance

**Means Comparisons**

**Comparisons with a control using Dunnett's Method**



**Oneway Analysis of Isoleucine By Label**

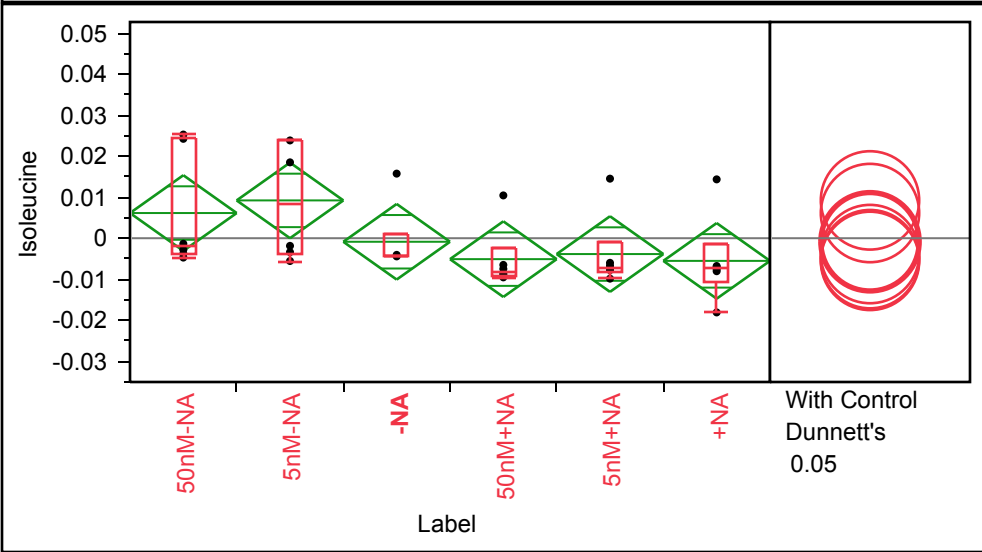

**Quantiles**

| Level   | Minimum  | 10%      | 25%      | Median   | 75%      | 90%      | Maximum  |
|---------|----------|----------|----------|----------|----------|----------|----------|
| 50nM-NA | -0.00472 | -0.00472 | -0.00403 | -0.00208 | 0.024492 | 0.025271 | 0.025271 |
| 5nM-NA  | -0.00556 | -0.00556 | -0.00393 | 0.008315 | 0.023802 | 0.023839 | 0.023839 |
| -NA     | -0.00443 | -0.00443 | -0.0043  | -0.0041  | 0.000891 | 0.015748 | 0.015748 |
| 50nM+NA | -0.00954 | -0.00954 | -0.00911 | -0.00802 | -0.00227 | 0.010432 | 0.010432 |
| 5nM+NA  | -0.00985 | -0.00985 | -0.00828 | -0.00704 | -0.00087 | 0.014518 | 0.014518 |
| +NA     | -0.01809 | -0.01809 | -0.01055 | -0.0073  | -0.0015  | 0.014348 | 0.014348 |

**Oneway Anova**

**Summary of Fit**

|                            |          |
|----------------------------|----------|
| Rsquare                    | 0.241838 |
| Adj Rsquare                | 0.115478 |
| Root Mean Square Error     | 0.011055 |
| Mean of Response           | 2.78e-11 |
| Observations (or Sum Wgts) | 36       |

**Analysis of Variance**

| Source   | DF | Sum of Squares | Mean Square | F Ratio | Prob > F |
|----------|----|----------------|-------------|---------|----------|
| Label    | 5  | 0.00116947     | 0.000234    | 1.9139  | 0.1215   |
| Error    | 30 | 0.00366629     | 0.000122    |         |          |
| C. Total | 35 | 0.00483576     |             |         |          |

**Means for Oneway Anova**

| Level   | Number | Mean     | Std Error | Lower 95% | Upper 95% |
|---------|--------|----------|-----------|-----------|-----------|
| 50nM-NA | 6      | 0.00614  | 0.00451   | -0.0031   | 0.01536   |
| 5nM-NA  | 6      | 0.00922  | 0.00451   | 1.33e-6   | 0.01844   |
| -NA     | 6      | -0.00086 | 0.00451   | -0.0101   | 0.00835   |
| 50nM+NA | 6      | -0.00510 | 0.00451   | -0.0143   | 0.00411   |
| 5nM+NA  | 6      | -0.00386 | 0.00451   | -0.0131   | 0.00535   |
| +NA     | 6      | -0.00553 | 0.00451   | -0.0147   | 0.00369   |

Std Error uses a pooled estimate of error variance

**Means Comparisons**

**Comparisons with a control using Dunnett's Method**

**Oneway Analysis of Ketohehexanoic acid By Label**

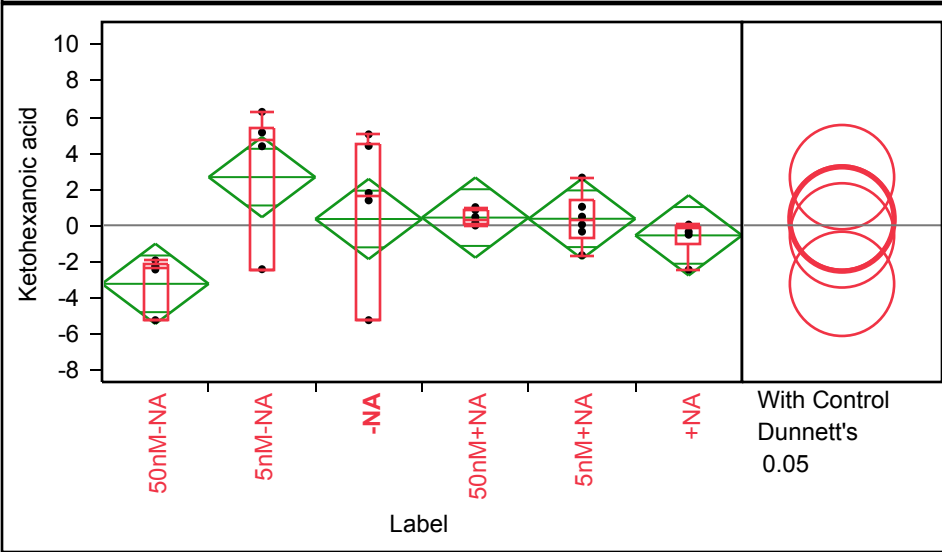

**Quantiles**

| Level   | Minimum  | 10%      | 25%      | Median   | 75%      | 90%      | Maximum  |
|---------|----------|----------|----------|----------|----------|----------|----------|
| 50nM-NA | -5.2599  | -5.2599  | -5.2599  | -2.37732 | -2.17182 | -1.94481 | -1.94481 |
| 5nM-NA  | -2.45635 | -2.45635 | -2.44043 | 4.737859 | 5.428362 | 6.284452 | 6.284452 |
| -NA     | -5.2599  | -5.2599  | -5.2599  | 1.584947 | 4.559031 | 5.038674 | 5.038674 |
| 50nM+NA | -0.01285 | -0.01285 | 0.080981 | 0.302995 | 0.886311 | 1.00483  | 1.00483  |
| 5nM+NA  | -1.66027 | -1.66027 | -0.67889 | 0.256098 | 1.430646 | 2.643512 | 2.643512 |
| +NA     | -2.46033 | -2.46033 | -1.00763 | -0.20238 | 0.002653 | 0.037529 | 0.037529 |

**Oneway Anova**

**Summary of Fit**

|                            |          |
|----------------------------|----------|
| Rsquare                    | 0.341388 |
| Adj Rsquare                | 0.231619 |
| Root Mean Square Error     | 2.664143 |
| Mean of Response           | -8.3e-11 |
| Observations (or Sum Wgts) | 36       |

**Analysis of Variance**

| Source   | DF | Sum of Squares | Mean Square | F Ratio | Prob > F |
|----------|----|----------------|-------------|---------|----------|
| Label    | 5  | 110.37080      | 22.0742     | 3.1101  | 0.0223 * |
| Error    | 30 | 212.92978      | 7.0977      |         |          |
| C. Total | 35 | 323.30058      |             |         |          |

**Means for Oneway Anova**

| Level   | Number | Mean    | Std Error | Lower 95% | Upper 95% |
|---------|--------|---------|-----------|-----------|-----------|
| 50nM-NA | 6      | -3.2445 | 1.0876    | -5.466    | -1.023    |
| 5nM-NA  | 6      | 2.6686  | 1.0876    | 0.447     | 4.890     |
| -NA     | 6      | 0.3480  | 1.0876    | -1.873    | 2.569     |
| 50nM+NA | 6      | 0.4262  | 1.0876    | -1.795    | 2.647     |
| 5nM+NA  | 6      | 0.3617  | 1.0876    | -1.860    | 2.583     |
| +NA     | 6      | -0.5600 | 1.0876    | -2.781    | 1.661     |

Std Error uses a pooled estimate of error variance

**Means Comparisons**

**Comparisons with a control using Dunnett's Method**

**Oneway Analysis of Ketoleucine By Label**

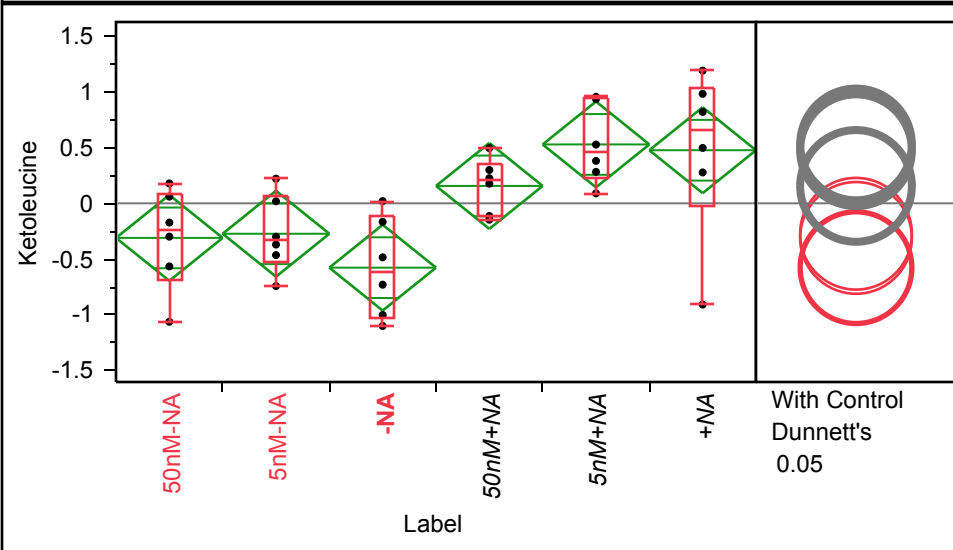

**Quantiles**

| Level   | Minimum  | 10%      | 25%      | Median   | 75%      | 90%      | Maximum  |
|---------|----------|----------|----------|----------|----------|----------|----------|
| 50nM-NA | -1.06152 | -1.06152 | -0.68921 | -0.2354  | 0.089503 | 0.17784  | 0.17784  |
| 5nM-NA  | -0.74157 | -0.74157 | -0.53354 | -0.33476 | 0.069009 | 0.220404 | 0.220404 |
| -NA     | -1.09913 | -1.09913 | -1.02565 | -0.60671 | -0.1196  | 0.019781 | 0.019781 |
| 50nM+NA | -0.14654 | -0.14654 | -0.12175 | 0.200822 | 0.347821 | 0.494637 | 0.494637 |
| 5nM+NA  | 0.089046 | 0.089046 | 0.233636 | 0.453477 | 0.939213 | 0.953809 | 0.953809 |
| +NA     | -0.90738 | -0.90738 | -0.0193  | 0.657517 | 1.03316  | 1.189201 | 1.189201 |

**Oneway Anova**

**Summary of Fit**

|                            |          |
|----------------------------|----------|
| Rsquare                    | 0.492188 |
| Adj Rsquare                | 0.407552 |
| Root Mean Square Error     | 0.461483 |
| Mean of Response           | 5.56e-10 |
| Observations (or Sum Wgts) | 36       |

**Analysis of Variance**

| Source   | DF | Sum of Squares | Mean Square | F Ratio | Prob > F |
|----------|----|----------------|-------------|---------|----------|
| Label    | 5  | 6.192401       | 1.23848     | 5.8154  | 0.0007 * |
| Error    | 30 | 6.388984       | 0.21297     |         |          |
| C. Total | 35 | 12.581385      |             |         |          |

**Means for Oneway Anova**

| Level   | Number | Mean     | Std Error | Lower 95% | Upper 95% |
|---------|--------|----------|-----------|-----------|-----------|
| 50nM-NA | 6      | -0.30992 | 0.18840   | -0.6947   | 0.0748    |
| 5nM-NA  | 6      | -0.27272 | 0.18840   | -0.6575   | 0.1120    |
| -NA     | 6      | -0.57667 | 0.18840   | -0.9614   | -0.1919   |
| 50nM+NA | 6      | 0.15586  | 0.18840   | -0.2289   | 0.5406    |
| 5nM+NA  | 6      | 0.52766  | 0.18840   | 0.1429    | 0.9124    |
| +NA     | 6      | 0.47579  | 0.18840   | 0.0910    | 0.8606    |

Std Error uses a pooled estimate of error variance

**Means Comparisons**

**Comparisons with a control using Dunnnett's Method**

**Oneway Analysis of Kynurenic acid By Label**

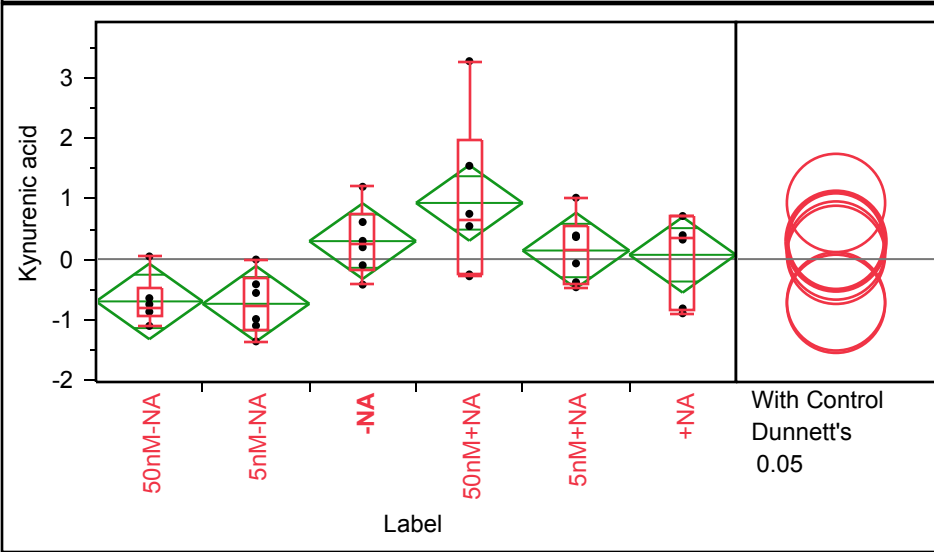

**Quantiles**

| Level   | Minimum  | 10%      | 25%      | Median   | 75%      | 90%      | Maximum  |
|---------|----------|----------|----------|----------|----------|----------|----------|
| 50nM-NA | -1.11174 | -1.11174 | -0.93613 | -0.81373 | -0.4761  | 0.044324 | 0.044324 |
| 5nM-NA  | -1.36867 | -1.36867 | -1.17229 | -0.77993 | -0.31579 | -0.00748 | -0.00748 |
| -NA     | -0.42467 | -0.42467 | -0.18274 | 0.250328 | 0.763346 | 1.202976 | 1.202976 |
| 50nM+NA | -0.28531 | -0.28531 | -0.26291 | 0.651102 | 1.987167 | 3.292816 | 3.292816 |
| 5nM+NA  | -0.46795 | -0.46795 | -0.40547 | 0.147821 | 0.550023 | 1.020516 | 1.020516 |
| +NA     | -0.9016  | -0.9016  | -0.84118 | 0.361097 | 0.712084 | 0.716731 | 0.716731 |

**Oneway Anova**

**Summary of Fit**

|                            |          |
|----------------------------|----------|
| Rsquare                    | 0.417851 |
| Adj Rsquare                | 0.320826 |
| Root Mean Square Error     | 0.753185 |
| Mean of Response           | 5.56e-11 |
| Observations (or Sum Wgts) | 36       |

**Analysis of Variance**

| Source   | DF | Sum of Squares | Mean Square | F Ratio | Prob > F |
|----------|----|----------------|-------------|---------|----------|
| Label    | 5  | 12.215491      | 2.44310     | 4.3066  | 0.0045 * |
| Error    | 30 | 17.018607      | 0.56729     |         |          |
| C. Total | 35 | 29.234099      |             |         |          |

**Means for Oneway Anova**

| Level   | Number | Mean     | Std Error | Lower 95% | Upper 95% |
|---------|--------|----------|-----------|-----------|-----------|
| 50nM-NA | 6      | -0.70368 | 0.30749   | -1.332    | -0.076    |
| 5nM-NA  | 6      | -0.74357 | 0.30749   | -1.372    | -0.116    |
| -NA     | 6      | 0.29894  | 0.30749   | -0.329    | 0.927     |
| 50nM+NA | 6      | 0.93437  | 0.30749   | 0.306     | 1.562     |
| 5nM+NA  | 6      | 0.14279  | 0.30749   | -0.485    | 0.771     |
| +NA     | 6      | 0.07114  | 0.30749   | -0.557    | 0.699     |

Std Error uses a pooled estimate of error variance

**Means Comparisons**

**Comparisons with a control using Dunnett's Method**

**Oneway Analysis of Kynurenine By Label**

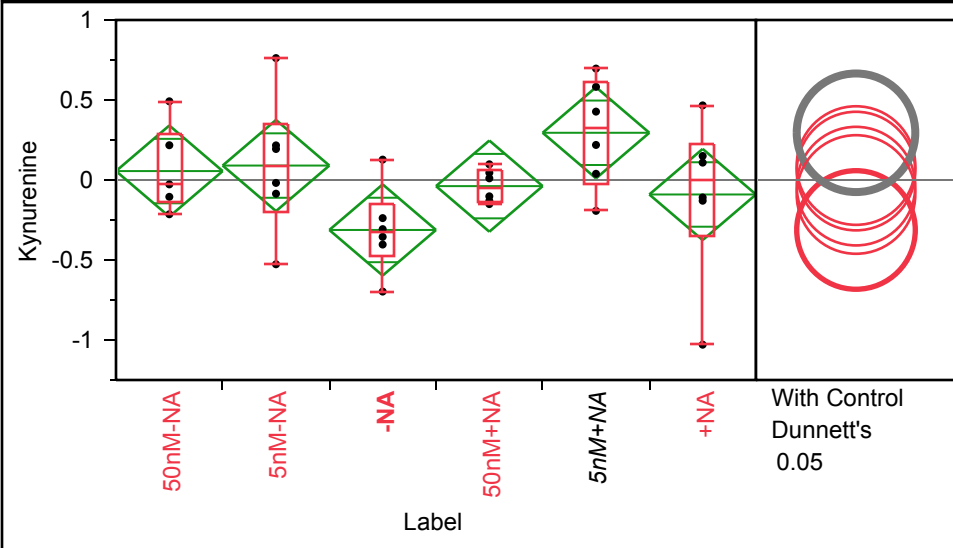

**Quantiles**

| Level   | Minimum  | 10%      | 25%      | Median   | 75%      | 90%      | Maximum  |
|---------|----------|----------|----------|----------|----------|----------|----------|
| 50nM-NA | -0.21414 | -0.21414 | -0.13248 | -0.02758 | 0.28592  | 0.49172  | 0.49172  |
| 5nM-NA  | -0.52661 | -0.52661 | -0.1959  | 0.087811 | 0.352725 | 0.761897 | 0.761897 |
| -NA     | -0.69731 | -0.69731 | -0.47687 | -0.3312  | -0.14679 | 0.127315 | 0.127315 |
| 50nM+NA | -0.15053 | -0.15053 | -0.13586 | -0.04581 | 0.05845  | 0.098076 | 0.098076 |
| 5nM+NA  | -0.19284 | -0.19284 | -0.01916 | 0.323218 | 0.610743 | 0.696295 | 0.696295 |
| +NA     | -1.02925 | -1.02925 | -0.35442 | -0.00028 | 0.22901  | 0.466204 | 0.466204 |

**Oneway Anova**

**Summary of Fit**

|                            |          |
|----------------------------|----------|
| Rsquare                    | 0.260515 |
| Adj Rsquare                | 0.137267 |
| Root Mean Square Error     | 0.341622 |
| Mean of Response           | -5.6e-10 |
| Observations (or Sum Wgts) | 36       |

**Analysis of Variance**

| Source   | DF | Sum of Squares | Mean Square | F Ratio | Prob > F |
|----------|----|----------------|-------------|---------|----------|
| Label    | 5  | 1.2334329      | 0.246687    | 2.1138  | 0.0911   |
| Error    | 30 | 3.5011666      | 0.116706    |         |          |
| C. Total | 35 | 4.7345995      |             |         |          |

**Means for Oneway Anova**

| Level   | Number | Mean     | Std Error | Lower 95% | Upper 95% |
|---------|--------|----------|-----------|-----------|-----------|
| 50nM-NA | 6      | 0.05575  | 0.13947   | -0.2291   | 0.3406    |
| 5nM-NA  | 6      | 0.09026  | 0.13947   | -0.1946   | 0.3751    |
| -NA     | 6      | -0.31233 | 0.13947   | -0.5972   | -0.0275   |
| 50nM+NA | 6      | -0.03830 | 0.13947   | -0.3231   | 0.2465    |
| 5nM+NA  | 6      | 0.29514  | 0.13947   | 0.0103    | 0.5800    |
| +NA     | 6      | -0.09052 | 0.13947   | -0.3754   | 0.1943    |

Std Error uses a pooled estimate of error variance

**Means Comparisons**

**Comparisons with a control using Dunnnett's Method**

**Oneway Analysis of Lactic acid By Label**

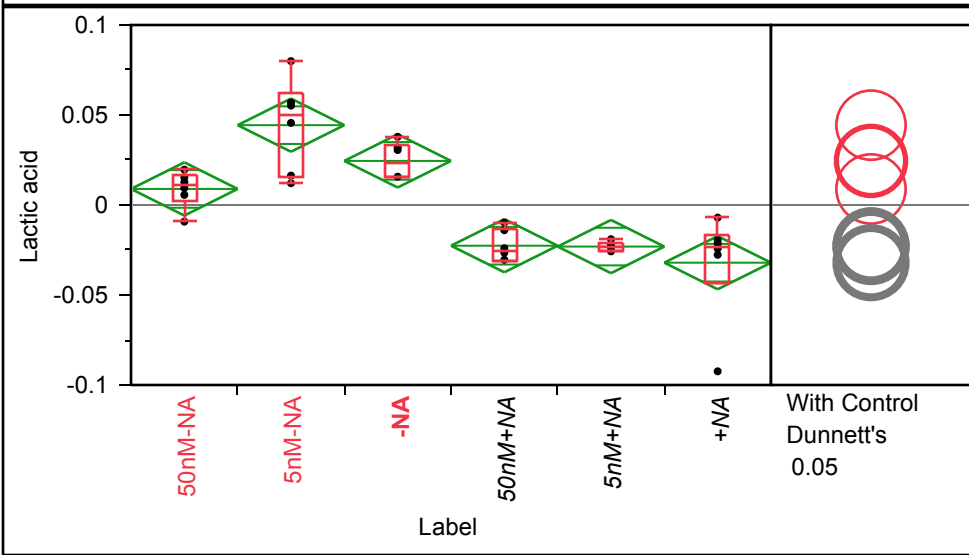

**Quantiles**

| Level   | Minimum  | 10%      | 25%      | Median   | 75%      | 90%      | Maximum  |
|---------|----------|----------|----------|----------|----------|----------|----------|
| 50nM-NA | -0.00925 | -0.00925 | 0.001915 | 0.011054 | 0.016431 | 0.019633 | 0.019633 |
| 5nM-NA  | 0.012135 | 0.012135 | 0.015263 | 0.050424 | 0.062682 | 0.079917 | 0.079917 |
| -NA     | 0.015368 | 0.015368 | 0.015515 | 0.023122 | 0.033402 | 0.037883 | 0.037883 |
| 50nM+NA | -0.03097 | -0.03097 | -0.03056 | -0.02527 | -0.01295 | -0.00979 | -0.00979 |
| 5nM+NA  | -0.02583 | -0.02583 | -0.02577 | -0.02303 | -0.02119 | -0.01901 | -0.01901 |
| +NA     | -0.0924  | -0.0924  | -0.04385 | -0.02285 | -0.0164  | -0.00701 | -0.00701 |

**Oneway Anova**

**Summary of Fit**

|                            |          |
|----------------------------|----------|
| Rsquare                    | 0.750206 |
| Adj Rsquare                | 0.708574 |
| Root Mean Square Error     | 0.017728 |
| Mean of Response           | -8.3e-11 |
| Observations (or Sum Wgts) | 36       |

**Analysis of Variance**

| Source   | DF | Sum of Squares | Mean Square | F Ratio | Prob > F |
|----------|----|----------------|-------------|---------|----------|
| Label    | 5  | 0.02831598     | 0.005663    | 18.0198 | <.0001 * |
| Error    | 30 | 0.00942829     | 0.000314    |         |          |
| C. Total | 35 | 0.03774427     |             |         |          |

**Means for Oneway Anova**

| Level   | Number | Mean     | Std Error | Lower 95% | Upper 95% |
|---------|--------|----------|-----------|-----------|-----------|
| 50nM-NA | 6      | 0.00892  | 0.00724   | -0.0059   | 0.0237    |
| 5nM-NA  | 6      | 0.04436  | 0.00724   | 0.0296    | 0.0591    |
| -NA     | 6      | 0.02449  | 0.00724   | 0.0097    | 0.0393    |
| 50nM+NA | 6      | -0.02262 | 0.00724   | -0.0374   | -0.0078   |
| 5nM+NA  | 6      | -0.02310 | 0.00724   | -0.0379   | -0.0083   |
| +NA     | 6      | -0.03205 | 0.00724   | -0.0468   | -0.0173   |

Std Error uses a pooled estimate of error variance

**Means Comparisons**

**Comparisons with a control using Dunnett's Method**

**Oneway Analysis of leucine By Label**

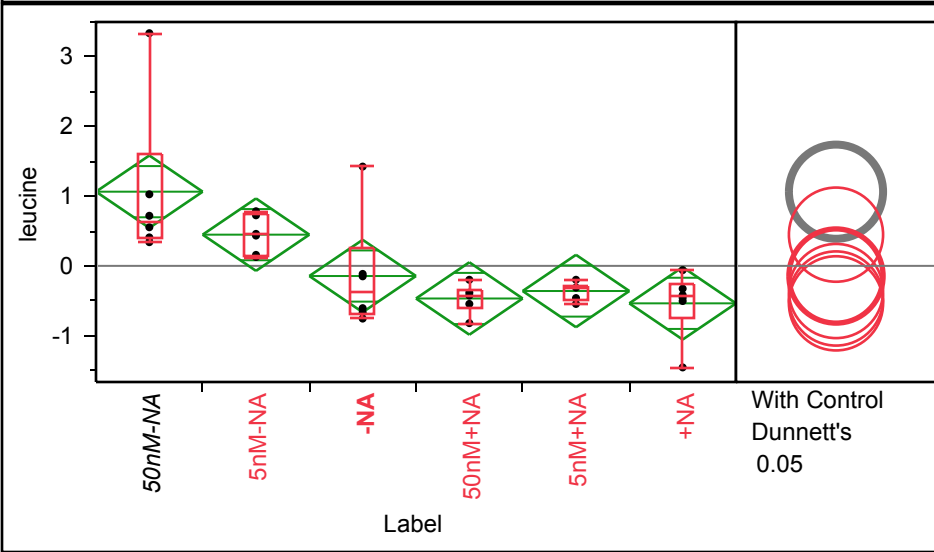

**Quantiles**

| Level   | Minimum  | 10%      | 25%      | Median   | 75%      | 90%      | Maximum  |
|---------|----------|----------|----------|----------|----------|----------|----------|
| 50nM-NA | 0.340126 | 0.340126 | 0.391415 | 0.636457 | 1.60532  | 3.339438 | 3.339438 |
| 5nM-NA  | 0.126874 | 0.126874 | 0.149855 | 0.446841 | 0.740309 | 0.783878 | 0.783878 |
| -NA     | -0.75656 | -0.75656 | -0.69139 | -0.37855 | 0.269448 | 1.42466  | 1.42466  |
| 50nM+NA | -0.82162 | -0.82162 | -0.61505 | -0.42873 | -0.33828 | -0.19943 | -0.19943 |
| 5nM+NA  | -0.5464  | -0.5464  | -0.48321 | -0.32309 | -0.28323 | -0.19965 | -0.19965 |
| +NA     | -1.45739 | -1.45739 | -0.74277 | -0.43845 | -0.2604  | -0.06135 | -0.06135 |

**Oneway Anova**

**Summary of Fit**

|                            |          |
|----------------------------|----------|
| Rsquare                    | 0.506783 |
| Adj Rsquare                | 0.42458  |
| Root Mean Square Error     | 0.623035 |
| Mean of Response           | 3.7e-17  |
| Observations (or Sum Wgts) | 36       |

**Analysis of Variance**

| Source   | DF | Sum of Squares | Mean Square | F Ratio | Prob > F |
|----------|----|----------------|-------------|---------|----------|
| Label    | 5  | 11.965482      | 2.39310     | 6.1650  | 0.0005 * |
| Error    | 30 | 11.645173      | 0.38817     |         |          |
| C. Total | 35 | 23.610655      |             |         |          |

**Means for Oneway Anova**

| Level   | Number | Mean    | Std Error | Lower 95% | Upper 95% |
|---------|--------|---------|-----------|-----------|-----------|
| 50nM-NA | 6      | 1.0647  | 0.25435   | 0.545     | 1.584     |
| 5nM-NA  | 6      | 0.4480  | 0.25435   | -0.072    | 0.967     |
| -NA     | 6      | -0.1457 | 0.25435   | -0.665    | 0.374     |
| 50nM+NA | 6      | -0.4682 | 0.25435   | -0.988    | 0.051     |
| 5nM+NA  | 6      | -0.3609 | 0.25435   | -0.880    | 0.159     |
| +NA     | 6      | -0.5378 | 0.25435   | -1.057    | -0.018    |

Std Error uses a pooled estimate of error variance

**Means Comparisons**

**Comparisons with a control using Dunnett's Method**

**Oneway Analysis of Lysine By Label**

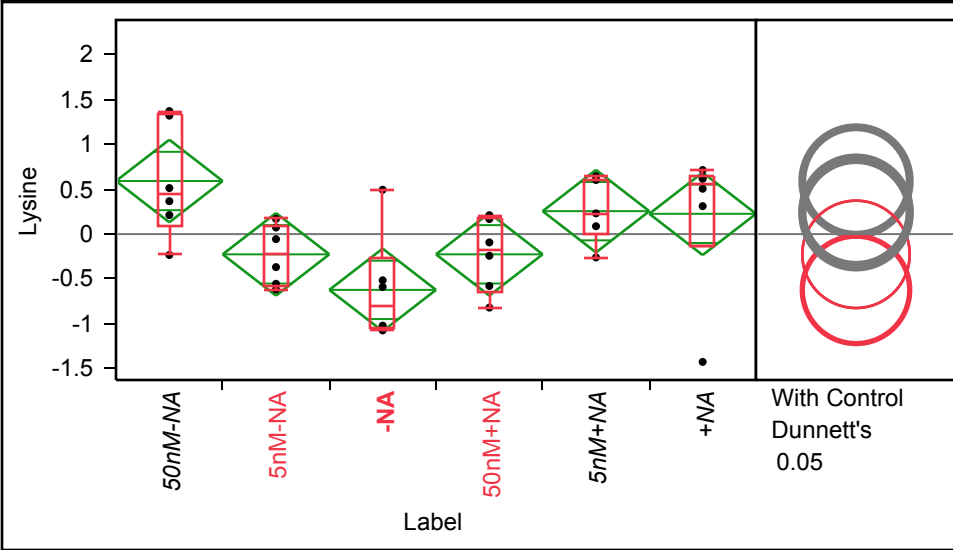

**Quantiles**

| Level   | Minimum  | 10%      | 25%      | Median   | 75%      | 90%      | Maximum  |
|---------|----------|----------|----------|----------|----------|----------|----------|
| 50nM-NA | -0.23263 | -0.23263 | 0.100689 | 0.439218 | 1.331313 | 1.369411 | 1.369411 |
| 5nM-NA  | -0.61703 | -0.61703 | -0.56977 | -0.21198 | 0.097086 | 0.168956 | 0.168956 |
| -NA     | -1.07225 | -1.07225 | -1.03719 | -0.80386 | -0.26267 | 0.493238 | 0.493238 |
| 50nM+NA | -0.81839 | -0.81839 | -0.63771 | -0.16719 | 0.178217 | 0.210599 | 0.210599 |
| 5nM+NA  | -0.2598  | -0.2598  | 0.000655 | 0.228295 | 0.612676 | 0.645479 | 0.645479 |
| +NA     | -1.42286 | -1.42286 | -0.12242 | 0.559837 | 0.653752 | 0.713035 | 0.713035 |

**Oneway Anova**

**Summary of Fit**

|                            |          |
|----------------------------|----------|
| Rsquare                    | 0.385506 |
| Adj Rsquare                | 0.28309  |
| Root Mean Square Error     | 0.551138 |
| Mean of Response           | 5.56e-10 |
| Observations (or Sum Wgts) | 36       |

**Analysis of Variance**

| Source   | DF | Sum of Squares | Mean Square | F Ratio | Prob > F |
|----------|----|----------------|-------------|---------|----------|
| Label    | 5  | 5.716830       | 1.14337     | 3.7641  | 0.0092 * |
| Error    | 30 | 9.112586       | 0.30375     |         |          |
| C. Total | 35 | 14.829416      |             |         |          |

**Means for Oneway Anova**

| Level   | Number | Mean     | Std Error | Lower 95% | Upper 95% |
|---------|--------|----------|-----------|-----------|-----------|
| 50nM-NA | 6      | 0.59094  | 0.22500   | 0.131     | 1.050     |
| 5nM-NA  | 6      | -0.22549 | 0.22500   | -0.685    | 0.234     |
| -NA     | 6      | -0.62114 | 0.22500   | -1.081    | -0.162    |
| 50nM+NA | 6      | -0.22537 | 0.22500   | -0.685    | 0.234     |
| 5nM+NA  | 6      | 0.25525  | 0.22500   | -0.204    | 0.715     |
| +NA     | 6      | 0.22582  | 0.22500   | -0.234    | 0.685     |

Std Error uses a pooled estimate of error variance

**Means Comparisons**

**Comparisons with a control using Dunnnett's Method**



**Oneway Analysis of LysoPC(20:4) By Label**

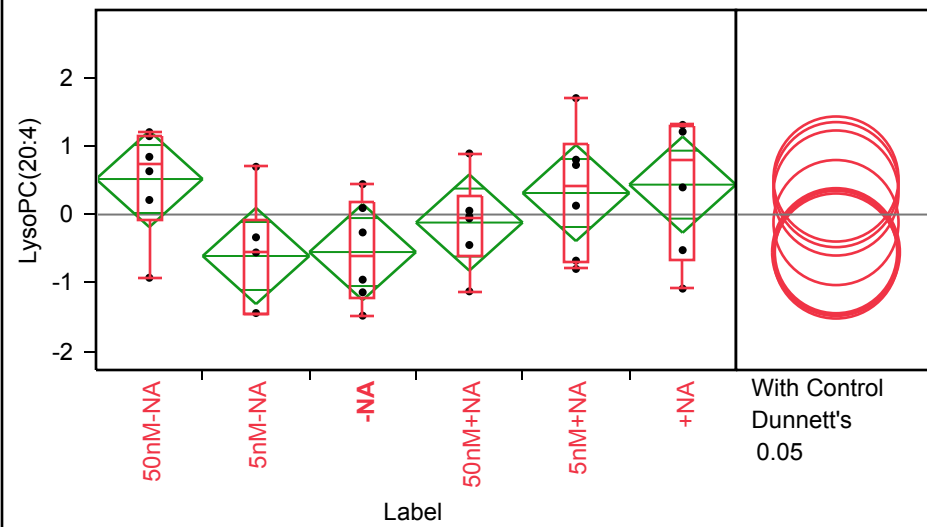

**Quantiles**

| Level   | Minimum  | 10%      | 25%      | Median   | 75%      | 90%      | Maximum  |
|---------|----------|----------|----------|----------|----------|----------|----------|
| 50nM-NA | -0.92482 | -0.92482 | -0.07138 | 0.738791 | 1.160998 | 1.204801 | 1.204801 |
| 5nM-NA  | -1.45042 | -1.45042 | -1.44318 | -0.55567 | -0.07538 | 0.69827  | 0.69827  |
| -NA     | -1.47888 | -1.47888 | -1.22283 | -0.60711 | 0.18244  | 0.444513 | 0.444513 |
| 50nM+NA | -1.12329 | -1.12329 | -0.61478 | -0.04155 | 0.265077 | 0.893426 | 0.893426 |
| 5nM+NA  | -0.79506 | -0.79506 | -0.70446 | 0.427443 | 1.027013 | 1.702661 | 1.702661 |
| +NA     | -1.08365 | -1.08365 | -0.66129 | 0.804391 | 1.309085 | 1.310922 | 1.310922 |

**Oneway Anova**

**Summary of Fit**

|                            |          |
|----------------------------|----------|
| Rsquare                    | 0.259055 |
| Adj Rsquare                | 0.135564 |
| Root Mean Square Error     | 0.843058 |
| Mean of Response           | 2.78e-10 |
| Observations (or Sum Wgts) | 36       |

**Analysis of Variance**

| Source   | DF | Sum of Squares | Mean Square | F Ratio | Prob > F |
|----------|----|----------------|-------------|---------|----------|
| Label    | 5  | 7.454895       | 1.49098     | 2.0978  | 0.0933   |
| Error    | 30 | 21.322426      | 0.71075     |         |          |
| C. Total | 35 | 28.777321      |             |         |          |

**Means for Oneway Anova**

| Level   | Number | Mean     | Std Error | Lower 95% | Upper 95% |
|---------|--------|----------|-----------|-----------|-----------|
| 50nM-NA | 6      | 0.51951  | 0.34418   | -0.183    | 1.2224    |
| 5nM-NA  | 6      | -0.60625 | 0.34418   | -1.309    | 0.0967    |
| -NA     | 6      | -0.54850 | 0.34418   | -1.251    | 0.1544    |
| 50nM+NA | 6      | -0.11710 | 0.34418   | -0.820    | 0.5858    |
| 5nM+NA  | 6      | 0.31500  | 0.34418   | -0.388    | 1.0179    |
| +NA     | 6      | 0.43734  | 0.34418   | -0.266    | 1.1402    |

Std Error uses a pooled estimate of error variance

**Means Comparisons**

**Comparisons with a control using Dunnett's Method**

**Oneway Analysis of Maleic acid By Label**

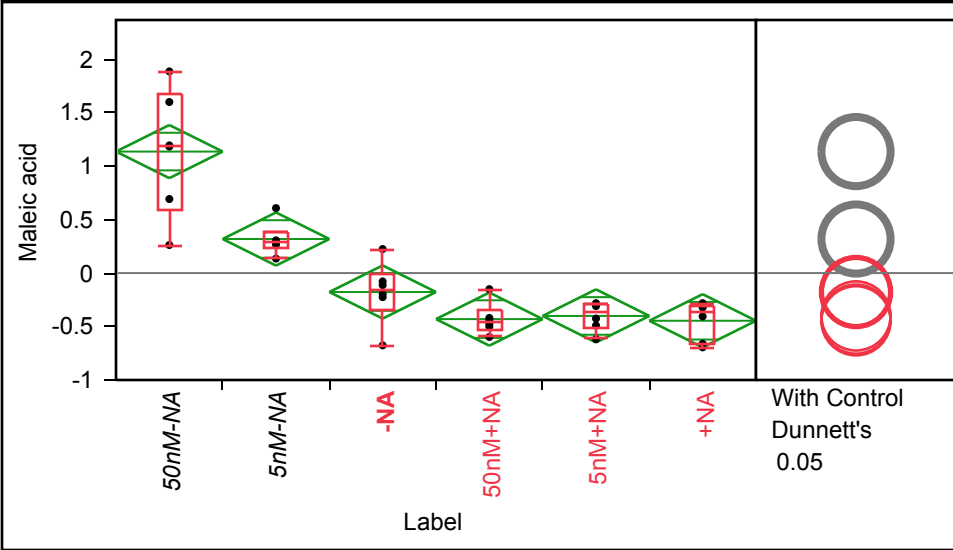

**Quantiles**

| Level   | Minimum  | 10%      | 25%      | Median   | 75%      | 90%      | Maximum  |
|---------|----------|----------|----------|----------|----------|----------|----------|
| 50nM-NA | 0.262362 | 0.262362 | 0.584959 | 1.188512 | 1.671113 | 1.885878 | 1.885878 |
| 5nM-NA  | 0.13551  | 0.13551  | 0.23395  | 0.297634 | 0.381465 | 0.607473 | 0.607473 |
| -NA     | -0.67602 | -0.67602 | -0.33791 | -0.15447 | -0.00248 | 0.224532 | 0.224532 |
| 50nM+NA | -0.59756 | -0.59756 | -0.52457 | -0.45759 | -0.35222 | -0.15027 | -0.15027 |
| 5nM+NA  | -0.61648 | -0.61648 | -0.52179 | -0.36707 | -0.28315 | -0.28144 | -0.28144 |
| +NA     | -0.69455 | -0.69455 | -0.66962 | -0.36352 | -0.30387 | -0.28169 | -0.28169 |

**Oneway Anova**

**Summary of Fit**

|                            |          |
|----------------------------|----------|
| Rsquare                    | 0.815885 |
| Adj Rsquare                | 0.785199 |
| Root Mean Square Error     | 0.298094 |
| Mean of Response           | 3.7e-17  |
| Observations (or Sum Wgts) | 36       |

**Analysis of Variance**

| Source   | DF | Sum of Squares | Mean Square | F Ratio | Prob > F |
|----------|----|----------------|-------------|---------|----------|
| Label    | 5  | 11.813197      | 2.36264     | 26.5883 | <.0001 * |
| Error    | 30 | 2.665806       | 0.08886     |         |          |
| C. Total | 35 | 14.479004      |             |         |          |

**Means for Oneway Anova**

| Level   | Number | Mean    | Std Error | Lower 95% | Upper 95% |
|---------|--------|---------|-----------|-----------|-----------|
| 50nM-NA | 6      | 1.1362  | 0.12170   | 0.8877    | 1.385     |
| 5nM-NA  | 6      | 0.3185  | 0.12170   | 0.0700    | 0.567     |
| -NA     | 6      | -0.1773 | 0.12170   | -0.4258   | 0.071     |
| 50nM+NA | 6      | -0.4305 | 0.12170   | -0.6790   | -0.182    |
| 5nM+NA  | 6      | -0.4010 | 0.12170   | -0.6495   | -0.152    |
| +NA     | 6      | -0.4460 | 0.12170   | -0.6945   | -0.197    |

Std Error uses a pooled estimate of error variance

**Means Comparisons**

**Comparisons with a control using Dunnett's Method**

**Oneway Analysis of Mannitol By Label**

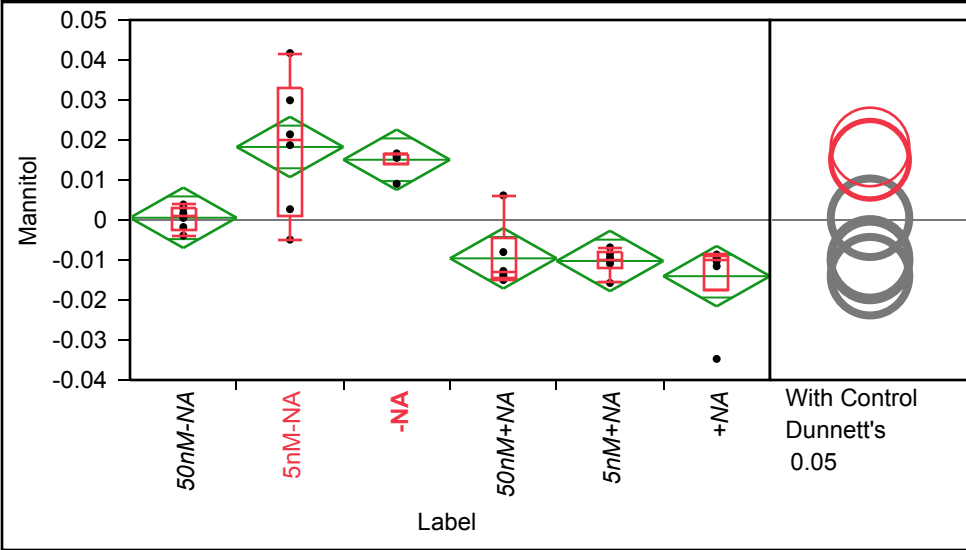

**Quantiles**

| Level   | Minimum  | 10%      | 25%      | Median   | 75%      | 90%      | Maximum  |
|---------|----------|----------|----------|----------|----------|----------|----------|
| 50nM-NA | -0.00389 | -0.00389 | -0.00229 | 0.001106 | 0.003144 | 0.00388  | 0.00388  |
| 5nM-NA  | -0.00491 | -0.00491 | 0.000787 | 0.020066 | 0.032877 | 0.041724 | 0.041724 |
| -NA     | 0.009048 | 0.009048 | 0.013903 | 0.016283 | 0.016607 | 0.016654 | 0.016654 |
| 50nM+NA | -0.01501 | -0.01501 | -0.01441 | -0.01322 | -0.00448 | 0.006157 | 0.006157 |
| 5nM+NA  | -0.01573 | -0.01573 | -0.01211 | -0.00976 | -0.00806 | -0.00685 | -0.00685 |
| +NA     | -0.03473 | -0.03473 | -0.01735 | -0.01001 | -0.00917 | -0.00864 | -0.00864 |

**Oneway Anova**

**Summary of Fit**

|                            |          |
|----------------------------|----------|
| Rsquare                    | 0.699991 |
| Adj Rsquare                | 0.649989 |
| Root Mean Square Error     | 0.009047 |
| Mean of Response           | 1.11e-10 |
| Observations (or Sum Wgts) | 36       |

**Analysis of Variance**

| Source   | DF | Sum of Squares | Mean Square | F Ratio | Prob > F |
|----------|----|----------------|-------------|---------|----------|
| Label    | 5  | 0.00572912     | 0.001146    | 13.9994 | <.0001 * |
| Error    | 30 | 0.00245545     | 0.000082    |         |          |
| C. Total | 35 | 0.00818456     |             |         |          |

**Means for Oneway Anova**

| Level   | Number | Mean     | Std Error | Lower 95% | Upper 95% |
|---------|--------|----------|-----------|-----------|-----------|
| 50nM-NA | 6      | 0.00056  | 0.00369   | -0.0070   | 0.0081    |
| 5nM-NA  | 6      | 0.01826  | 0.00369   | 0.0107    | 0.0258    |
| -NA     | 6      | 0.01506  | 0.00369   | 0.0075    | 0.0226    |
| 50nM+NA | 6      | -0.00959 | 0.00369   | -0.0171   | -0.0020   |
| 5nM+NA  | 6      | -0.01024 | 0.00369   | -0.0178   | -0.0027   |
| +NA     | 6      | -0.01405 | 0.00369   | -0.0216   | -0.0065   |

Std Error uses a pooled estimate of error variance

**Means Comparisons**

**Comparisons with a control using Dunnett's Method**

**Oneway Analysis of methionine By Label**

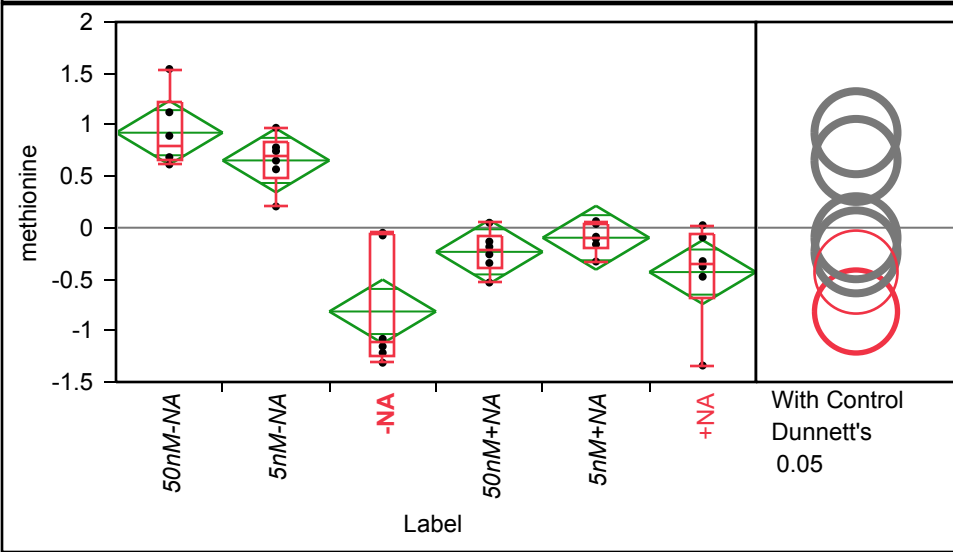

**Quantiles**

| Level   | Minimum  | 10%      | 25%      | Median   | 75%      | 90%      | Maximum  |
|---------|----------|----------|----------|----------|----------|----------|----------|
| 50nM-NA | 0.614893 | 0.614893 | 0.665993 | 0.789622 | 1.227584 | 1.542737 | 1.542737 |
| 5nM-NA  | 0.206911 | 0.206911 | 0.477743 | 0.698681 | 0.828752 | 0.971141 | 0.971141 |
| -NA     | -1.31261 | -1.31261 | -1.24    | -1.11701 | -0.06859 | -0.04944 | -0.04944 |
| 50nM+NA | -0.53312 | -0.53312 | -0.39107 | -0.22242 | -0.08895 | 0.047893 | 0.047893 |
| 5nM+NA  | -0.32881 | -0.32881 | -0.20347 | -0.09714 | 0.04381  | 0.063647 | 0.063647 |
| +NA     | -1.33986 | -1.33986 | -0.69207 | -0.3512  | -0.06432 | 0.024174 | 0.024174 |

**Oneway Anova**

**Summary of Fit**

|                            |          |
|----------------------------|----------|
| Rsquare                    | 0.760327 |
| Adj Rsquare                | 0.720381 |
| Root Mean Square Error     | 0.372012 |
| Mean of Response           | 5.56e-10 |
| Observations (or Sum Wgts) | 36       |

**Analysis of Variance**

| Source   | DF | Sum of Squares | Mean Square | F Ratio | Prob > F |
|----------|----|----------------|-------------|---------|----------|
| Label    | 5  | 13.170918      | 2.63418     | 19.0341 | <.0001 * |
| Error    | 30 | 4.151795       | 0.13839     |         |          |
| C. Total | 35 | 17.322713      |             |         |          |

**Means for Oneway Anova**

| Level   | Number | Mean     | Std Error | Lower 95% | Upper 95% |
|---------|--------|----------|-----------|-----------|-----------|
| 50nM-NA | 6      | 0.92374  | 0.15187   | 0.614     | 1.234     |
| 5nM-NA  | 6      | 0.65412  | 0.15187   | 0.344     | 0.964     |
| -NA     | 6      | -0.81447 | 0.15187   | -1.125    | -0.504    |
| 50nM+NA | 6      | -0.23473 | 0.15187   | -0.545    | 0.075     |
| 5nM+NA  | 6      | -0.09732 | 0.15187   | -0.407    | 0.213     |
| +NA     | 6      | -0.43134 | 0.15187   | -0.742    | -0.121    |

Std Error uses a pooled estimate of error variance

**Means Comparisons**

**Comparisons with a control using Dunnett's Method**

**Oneway Analysis of Methionine sulfoxide By Label**

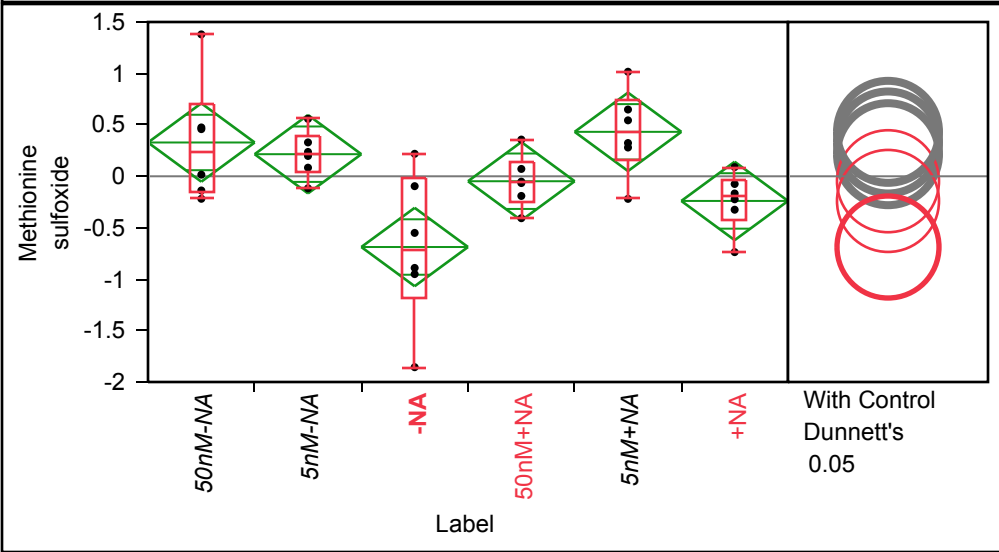

**Quantiles**

| Level   | Minimum  | 10%      | 25%      | Median   | 75%      | 90%      | Maximum  |
|---------|----------|----------|----------|----------|----------|----------|----------|
| 50nM-NA | -0.21868 | -0.21868 | -0.15826 | 0.237157 | 0.70089  | 1.379433 | 1.379433 |
| 5nM-NA  | -0.11691 | -0.11691 | 0.033535 | 0.21711  | 0.386642 | 0.558395 | 0.558395 |
| -NA     | -1.8561  | -1.8561  | -1.17727 | -0.72075 | -0.01744 | 0.218619 | 0.218619 |
| 50nM+NA | -0.4076  | -0.4076  | -0.24526 | -0.05905 | 0.142791 | 0.356858 | 0.356858 |
| 5nM+NA  | -0.21948 | -0.21948 | 0.154844 | 0.433649 | 0.740775 | 1.016291 | 1.016291 |
| +NA     | -0.73738 | -0.73738 | -0.42804 | -0.19536 | -0.03377 | 0.089422 | 0.089422 |

**Oneway Anova**

**Summary of Fit**

|                            |          |
|----------------------------|----------|
| Rsquare                    | 0.455411 |
| Adj Rsquare                | 0.364647 |
| Root Mean Square Error     | 0.457077 |
| Mean of Response           | 5.56e-10 |
| Observations (or Sum Wgts) | 36       |

**Analysis of Variance**

| Source   | DF | Sum of Squares | Mean Square | F Ratio | Prob > F |
|----------|----|----------------|-------------|---------|----------|
| Label    | 5  | 5.241245       | 1.04825     | 5.0175  | 0.0019 * |
| Error    | 30 | 6.267571       | 0.20892     |         |          |
| C. Total | 35 | 11.508816      |             |         |          |

**Means for Oneway Anova**

| Level   | Number | Mean     | Std Error | Lower 95% | Upper 95% |
|---------|--------|----------|-----------|-----------|-----------|
| 50nM-NA | 6      | 0.32861  | 0.18660   | -0.052    | 0.7097    |
| 5nM-NA  | 6      | 0.21480  | 0.18660   | -0.166    | 0.5959    |
| -NA     | 6      | -0.68768 | 0.18660   | -1.069    | -0.3066   |
| 50nM+NA | 6      | -0.04809 | 0.18660   | -0.429    | 0.3330    |
| 5nM+NA  | 6      | 0.43211  | 0.18660   | 0.051     | 0.8132    |
| +NA     | 6      | -0.23974 | 0.18660   | -0.621    | 0.1413    |

Std Error uses a pooled estimate of error variance

**Means Comparisons**

**Comparisons with a control using Dunnett's Method**

**Oneway Analysis of Methylcysteine By Label**

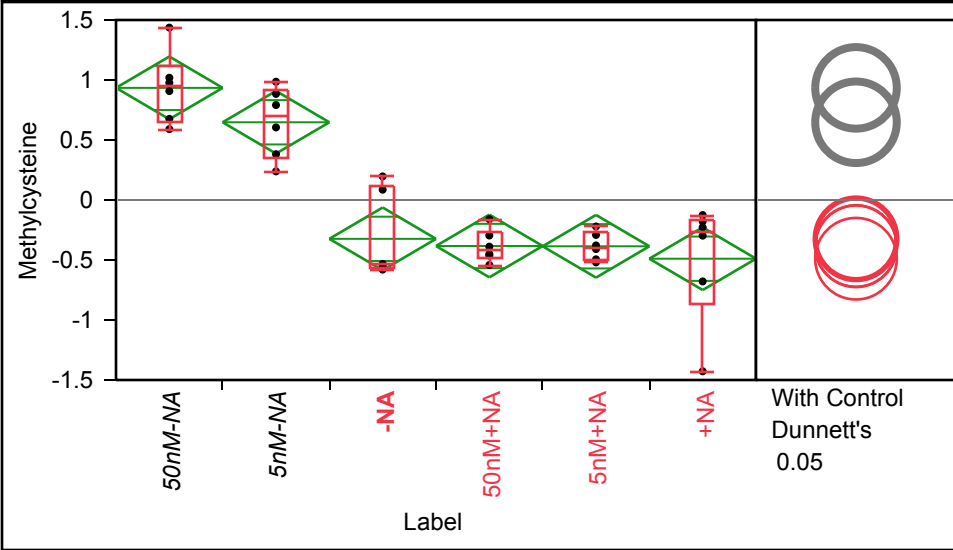

**Quantiles**

| Level   | Minimum  | 10%      | 25%      | Median   | 75%      | 90%      | Maximum  |
|---------|----------|----------|----------|----------|----------|----------|----------|
| 50nM-NA | 0.590471 | 0.590471 | 0.654694 | 0.942237 | 1.12329  | 1.436392 | 1.436392 |
| 5nM-NA  | 0.238678 | 0.238678 | 0.345786 | 0.698135 | 0.909367 | 0.985395 | 0.985395 |
| -NA     | -0.58012 | -0.58012 | -0.57049 | -0.5386  | 0.113707 | 0.196289 | 0.196289 |
| 50nM+NA | -0.54188 | -0.54188 | -0.48287 | -0.41976 | -0.26193 | -0.15984 | -0.15984 |
| 5nM+NA  | -0.5201  | -0.5201  | -0.50098 | -0.39378 | -0.27356 | -0.22098 | -0.22098 |
| +NA     | -1.42746 | -1.42746 | -0.86589 | -0.26254 | -0.16536 | -0.12548 | -0.12548 |

**Oneway Anova**

**Summary of Fit**

|                            |          |
|----------------------------|----------|
| Rsquare                    | 0.797529 |
| Adj Rsquare                | 0.763784 |
| Root Mean Square Error     | 0.313238 |
| Mean of Response           | -2.8e-10 |
| Observations (or Sum Wgts) | 36       |

**Analysis of Variance**

| Source   | DF | Sum of Squares | Mean Square | F Ratio | Prob > F |
|----------|----|----------------|-------------|---------|----------|
| Label    | 5  | 11.594558      | 2.31891     | 23.6339 | <.0001 * |
| Error    | 30 | 2.943535       | 0.09812     |         |          |
| C. Total | 35 | 14.538093      |             |         |          |

**Means for Oneway Anova**

| Level   | Number | Mean     | Std Error | Lower 95% | Upper 95% |
|---------|--------|----------|-----------|-----------|-----------|
| 50nM-NA | 6      | 0.93439  | 0.12788   | 0.6732    | 1.196     |
| 5nM-NA  | 6      | 0.64764  | 0.12788   | 0.3865    | 0.909     |
| -NA     | 6      | -0.32369 | 0.12788   | -0.5849   | -0.063    |
| 50nM+NA | 6      | -0.38340 | 0.12788   | -0.6446   | -0.122    |
| 5nM+NA  | 6      | -0.38572 | 0.12788   | -0.6469   | -0.125    |
| +NA     | 6      | -0.48923 | 0.12788   | -0.7504   | -0.228    |

Std Error uses a pooled estimate of error variance

**Means Comparisons**

**Comparisons with a control using Dunnett's Method**

**Oneway Analysis of Methylmalonic acid By Label**

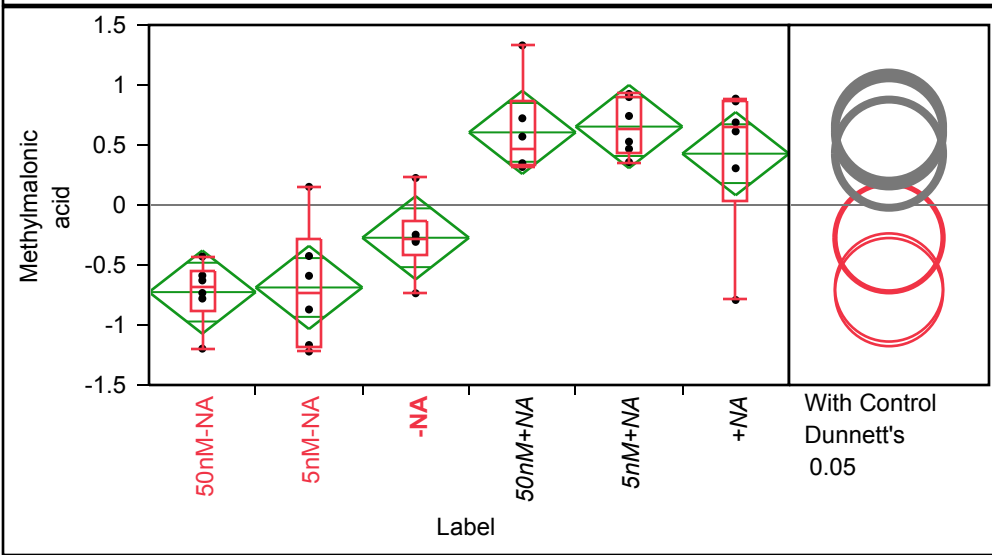

**Quantiles**

| Level   | Minimum  | 10%      | 25%      | Median   | 75%      | 90%      | Maximum  |
|---------|----------|----------|----------|----------|----------|----------|----------|
| 50nM-NA | -1.19704 | -1.19704 | -0.88408 | -0.68085 | -0.5482  | -0.42973 | -0.42973 |
| 5nM-NA  | -1.22134 | -1.22134 | -1.18074 | -0.73048 | -0.28108 | 0.151133 | 0.151133 |
| -NA     | -0.7356  | -0.7356  | -0.41417 | -0.28646 | -0.12917 | 0.225243 | 0.225243 |
| 50nM+NA | 0.316801 | 0.316801 | 0.336665 | 0.459194 | 0.874343 | 1.329626 | 1.329626 |
| 5nM+NA  | 0.357701 | 0.357701 | 0.440306 | 0.634847 | 0.905958 | 0.925406 | 0.925406 |
| +NA     | -0.79131 | -0.79131 | 0.031685 | 0.650869 | 0.869222 | 0.886267 | 0.886267 |

**Oneway Anova**

**Summary of Fit**

|                            |          |
|----------------------------|----------|
| Rsquare                    | 0.703758 |
| Adj Rsquare                | 0.654384 |
| Root Mean Square Error     | 0.415419 |
| Mean of Response           | 5.556e-9 |
| Observations (or Sum Wgts) | 36       |

**Analysis of Variance**

| Source   | DF | Sum of Squares | Mean Square | F Ratio | Prob > F |
|----------|----|----------------|-------------|---------|----------|
| Label    | 5  | 12.299021      | 2.45980     | 14.2537 | <.0001 * |
| Error    | 30 | 5.177187       | 0.17257     |         |          |
| C. Total | 35 | 17.476208      |             |         |          |

**Means for Oneway Anova**

| Level   | Number | Mean     | Std Error | Lower 95% | Upper 95% |
|---------|--------|----------|-----------|-----------|-----------|
| 50nM-NA | 6      | -0.72599 | 0.16959   | -1.072    | -0.3796   |
| 5nM-NA  | 6      | -0.68725 | 0.16959   | -1.034    | -0.3409   |
| -NA     | 6      | -0.27294 | 0.16959   | -0.619    | 0.0734    |
| 50nM+NA | 6      | 0.60511  | 0.16959   | 0.259     | 0.9515    |
| 5nM+NA  | 6      | 0.65335  | 0.16959   | 0.307     | 0.9997    |
| +NA     | 6      | 0.42771  | 0.16959   | 0.081     | 0.7741    |

Std Error uses a pooled estimate of error variance

**Means Comparisons**

**Comparisons with a control using Dunnnett's Method**

**Oneway Analysis of Myo-Inositol By Label**

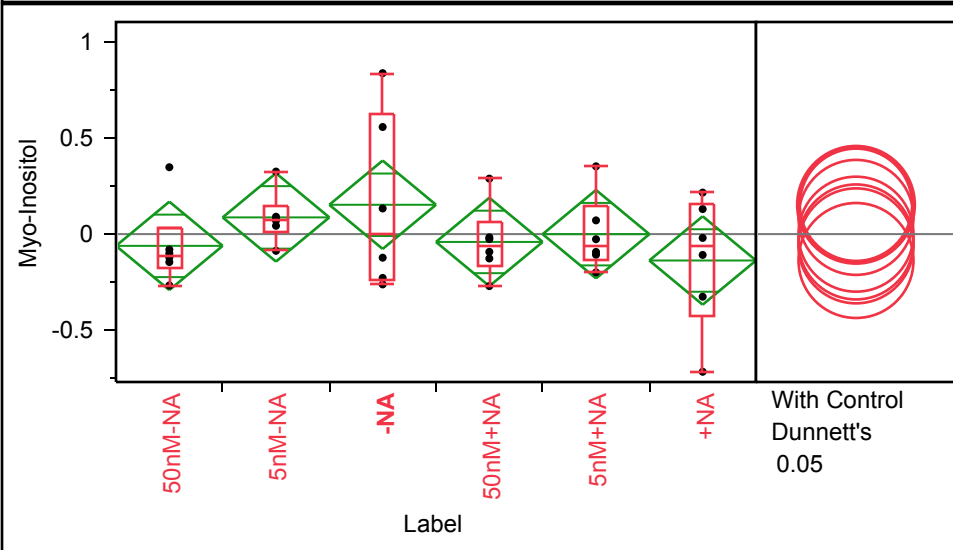

**Quantiles**

| Level   | Minimum  | 10%      | 25%      | Median   | 75%      | 90%      | Maximum  |
|---------|----------|----------|----------|----------|----------|----------|----------|
| 50nM-NA | -0.2675  | -0.2675  | -0.17627 | -0.11128 | 0.026825 | 0.348618 | 0.348618 |
| 5nM-NA  | -0.08716 | -0.08716 | 0.01069  | 0.07505  | 0.149364 | 0.325859 | 0.325859 |
| -NA     | -0.26216 | -0.26216 | -0.23683 | 0.005367 | 0.628396 | 0.838897 | 0.838897 |
| 50nM+NA | -0.27092 | -0.27092 | -0.16296 | -0.05946 | 0.059446 | 0.289118 | 0.289118 |
| 5nM+NA  | -0.19953 | -0.19953 | -0.13068 | -0.0598  | 0.142017 | 0.353205 | 0.353205 |
| +NA     | -0.71751 | -0.71751 | -0.42412 | -0.06416 | 0.151914 | 0.216336 | 0.216336 |

**Oneway Anova**

**Summary of Fit**

|                            |          |
|----------------------------|----------|
| Rsquare                    | 0.126616 |
| Adj Rsquare                | -0.01895 |
| Root Mean Square Error     | 0.276224 |
| Mean of Response           | 5.56e-10 |
| Observations (or Sum Wgts) | 36       |

**Analysis of Variance**

| Source   | DF | Sum of Squares | Mean Square | F Ratio | Prob > F |
|----------|----|----------------|-------------|---------|----------|
| Label    | 5  | 0.3318384      | 0.066368    | 0.8698  | 0.5128   |
| Error    | 30 | 2.2889879      | 0.076300    |         |          |
| C. Total | 35 | 2.6208263      |             |         |          |

**Means for Oneway Anova**

| Level   | Number | Mean     | Std Error | Lower 95% | Upper 95% |
|---------|--------|----------|-----------|-----------|-----------|
| 50nM-NA | 6      | -0.06129 | 0.11277   | -0.2916   | 0.16901   |
| 5nM-NA  | 6      | 0.08711  | 0.11277   | -0.1432   | 0.31741   |
| -NA     | 6      | 0.15289  | 0.11277   | -0.0774   | 0.38319   |
| 50nM+NA | 6      | -0.04080 | 0.11277   | -0.2711   | 0.18950   |
| 5nM+NA  | 6      | -0.00034 | 0.11277   | -0.2306   | 0.22996   |
| +NA     | 6      | -0.13756 | 0.11277   | -0.3679   | 0.09274   |

Std Error uses a pooled estimate of error variance

**Means Comparisons**

**Comparisons with a control using Dunnett's Method**



**Oneway Analysis of N6-Acetyl-L-lysine By Label**

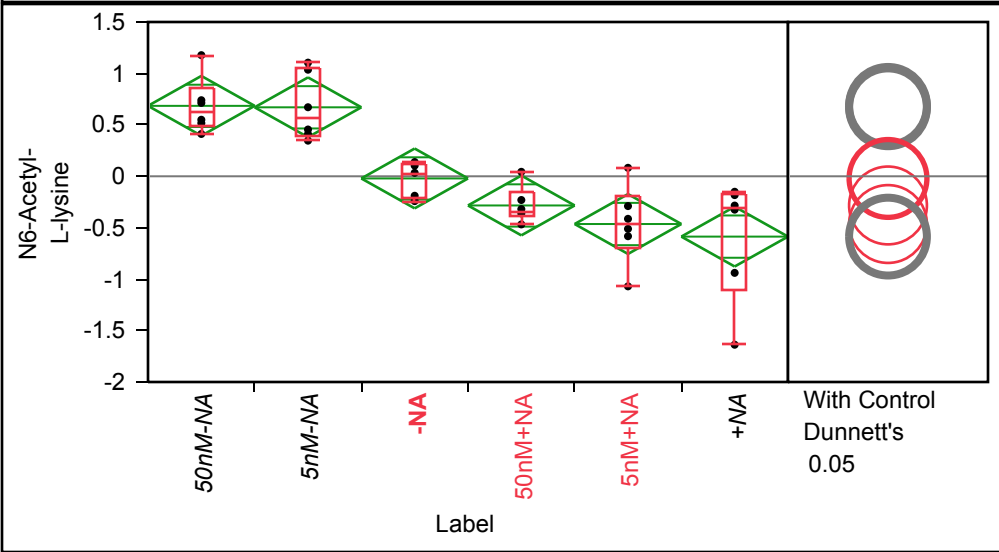

**Quantiles**

| Level   | Minimum  | 10%      | 25%      | Median   | 75%      | 90%      | Maximum  |
|---------|----------|----------|----------|----------|----------|----------|----------|
| 50nM-NA | 0.411463 | 0.411463 | 0.490235 | 0.631556 | 0.849076 | 1.177555 | 1.177555 |
| 5nM-NA  | 0.346377 | 0.346377 | 0.394302 | 0.562975 | 1.053342 | 1.104786 | 1.104786 |
| -NA     | -0.24133 | -0.24133 | -0.20232 | 0.030891 | 0.112721 | 0.138461 | 0.138461 |
| 50nM+NA | -0.46791 | -0.46791 | -0.39178 | -0.34014 | -0.16221 | 0.043378 | 0.043378 |
| 5nM+NA  | -1.07004 | -1.07004 | -0.70451 | -0.46232 | -0.19667 | 0.08237  | 0.08237  |
| +NA     | -1.63758 | -1.63758 | -1.11363 | -0.30451 | -0.17471 | -0.15055 | -0.15055 |

**Oneway Anova**

**Summary of Fit**

|                            |          |
|----------------------------|----------|
| Rsquare                    | 0.719417 |
| Adj Rsquare                | 0.672654 |
| Root Mean Square Error     | 0.348697 |
| Mean of Response           | 2.78e-10 |
| Observations (or Sum Wgts) | 36       |

**Analysis of Variance**

| Source   | DF | Sum of Squares | Mean Square | F Ratio | Prob > F |
|----------|----|----------------|-------------|---------|----------|
| Label    | 5  | 9.352703       | 1.87054     | 15.3841 | <.0001 * |
| Error    | 30 | 3.647682       | 0.12159     |         |          |
| C. Total | 35 | 13.000385      |             |         |          |

**Means for Oneway Anova**

| Level   | Number | Mean     | Std Error | Lower 95% | Upper 95% |
|---------|--------|----------|-----------|-----------|-----------|
| 50nM-NA | 6      | 0.68470  | 0.14235   | 0.3940    | 0.9754    |
| 5nM-NA  | 6      | 0.67060  | 0.14235   | 0.3799    | 0.9613    |
| -NA     | 6      | -0.02104 | 0.14235   | -0.3118   | 0.2697    |
| 50nM+NA | 6      | -0.28366 | 0.14235   | -0.5744   | 0.0071    |
| 5nM+NA  | 6      | -0.46411 | 0.14235   | -0.7548   | -0.1734   |
| +NA     | 6      | -0.58648 | 0.14235   | -0.8772   | -0.2958   |

Std Error uses a pooled estimate of error variance

**Means Comparisons**

**Comparisons with a control using Dunnett's Method**

**Oneway Analysis of N-Acetylaspartylglutamic acid By Label**

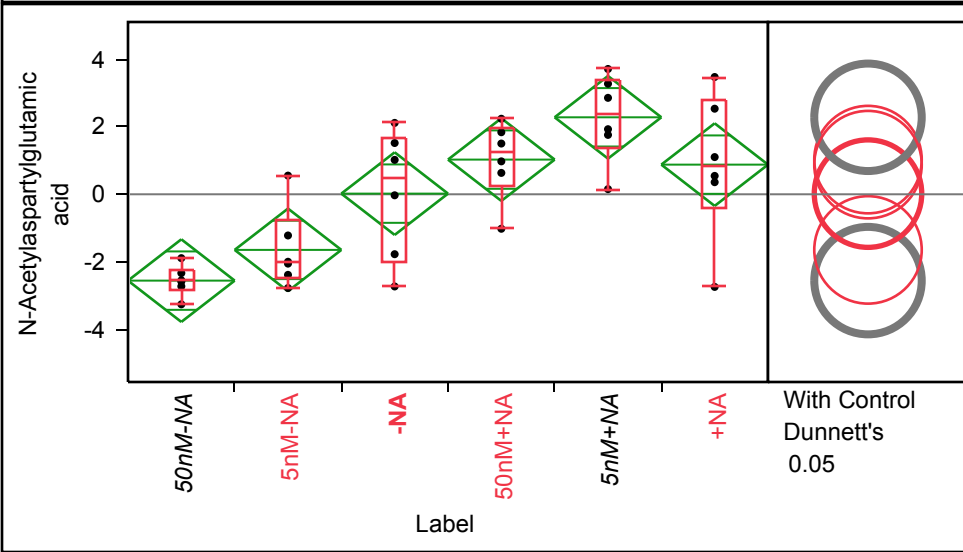

**Quantiles**

| Level   | Minimum  | 10%      | 25%      | Median   | 75%      | 90%      | Maximum  |
|---------|----------|----------|----------|----------|----------|----------|----------|
| 50nM-NA | -3.2649  | -3.2649  | -2.86426 | -2.57019 | -2.22753 | -1.89513 | -1.89513 |
| 5nM-NA  | -2.78146 | -2.78146 | -2.48832 | -2.02976 | -0.77834 | 0.553562 | 0.553562 |
| -NA     | -2.73496 | -2.73496 | -2.0169  | 0.495194 | 1.670173 | 2.11761  | 2.11761  |
| 50nM+NA | -1.02296 | -1.02296 | 0.219803 | 1.240819 | 1.940557 | 2.240481 | 2.240481 |
| 5nM+NA  | 0.152649 | 0.152649 | 1.359408 | 2.395811 | 3.388718 | 3.717227 | 3.717227 |
| +NA     | -2.7483  | -2.7483  | -0.41804 | 0.824347 | 2.773932 | 3.479115 | 3.479115 |

**Oneway Anova**

**Summary of Fit**

|                            |          |
|----------------------------|----------|
| Rsquare                    | 0.601958 |
| Adj Rsquare                | 0.535617 |
| Root Mean Square Error     | 1.469679 |
| Mean of Response           | 8.33e-10 |
| Observations (or Sum Wgts) | 36       |

**Analysis of Variance**

| Source   | DF | Sum of Squares | Mean Square | F Ratio | Prob > F |
|----------|----|----------------|-------------|---------|----------|
| Label    | 5  | 97.99478       | 19.5990     | 9.0738  | <.0001 * |
| Error    | 30 | 64.79871       | 2.1600      |         |          |
| C. Total | 35 | 162.79349      |             |         |          |

**Means for Oneway Anova**

| Level   | Number | Mean    | Std Error | Lower 95% | Upper 95% |
|---------|--------|---------|-----------|-----------|-----------|
| 50nM-NA | 6      | -2.5616 | 0.59999   | -3.787    | -1.336    |
| 5nM-NA  | 6      | -1.6501 | 0.59999   | -2.875    | -0.425    |
| -NA     | 6      | 0.0194  | 0.59999   | -1.206    | 1.245     |
| 50nM+NA | 6      | 1.0290  | 0.59999   | -0.196    | 2.254     |
| 5nM+NA  | 6      | 2.2837  | 0.59999   | 1.058     | 3.509     |
| +NA     | 6      | 0.8795  | 0.59999   | -0.346    | 2.105     |

Std Error uses a pooled estimate of error variance

**Means Comparisons**

**Comparisons with a control using Dunnett's Method**

**Oneway Analysis of N-acetyl-glucosamine-1-phosphate By Label**

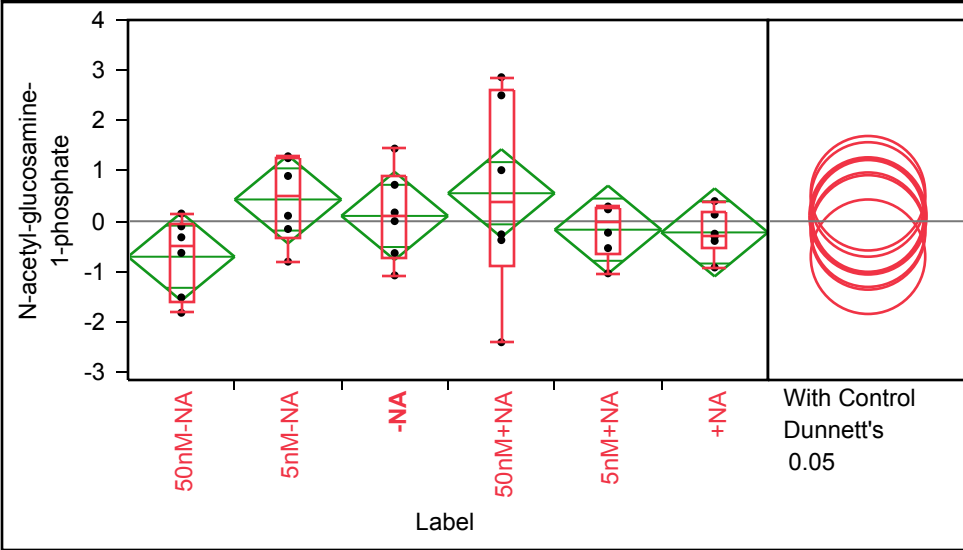

**Quantiles**

| Level   | Minimum  | 10%      | 25%      | Median   | 75%      | 90%      | Maximum  |
|---------|----------|----------|----------|----------|----------|----------|----------|
| 50nM-NA | -1.81936 | -1.81936 | -1.59109 | -0.47434 | -0.03783 | 0.153266 | 0.153266 |
| 5nM-NA  | -0.80255 | -0.80255 | -0.31655 | 0.504439 | 1.263252 | 1.290829 | 1.290829 |
| -NA     | -1.07632 | -1.07632 | -0.74407 | 0.088386 | 0.903755 | 1.444037 | 1.444037 |
| 50nM+NA | -2.40501 | -2.40501 | -0.88235 | 0.377117 | 2.592505 | 2.862516 | 2.862516 |
| 5nM+NA  | -1.0349  | -1.0349  | -0.65945 | 0.004717 | 0.268109 | 0.292596 | 0.292596 |
| +NA     | -0.91877 | -0.91877 | -0.52301 | -0.27738 | 0.199281 | 0.399752 | 0.399752 |

**Oneway Anova**

**Summary of Fit**

|                            |          |
|----------------------------|----------|
| Rsquare                    | 0.164549 |
| Adj Rsquare                | 0.025307 |
| Root Mean Square Error     | 1.048721 |
| Mean of Response           | 8.33e-10 |
| Observations (or Sum Wgts) | 36       |

**Analysis of Variance**

| Source   | DF | Sum of Squares | Mean Square | F Ratio | Prob > F |
|----------|----|----------------|-------------|---------|----------|
| Label    | 5  | 6.498546       | 1.29971     | 1.1818  | 0.3413   |
| Error    | 30 | 32.994473      | 1.09982     |         |          |
| C. Total | 35 | 39.493018      |             |         |          |

**Means for Oneway Anova**

| Level   | Number | Mean     | Std Error | Lower 95% | Upper 95% |
|---------|--------|----------|-----------|-----------|-----------|
| 50nM-NA | 6      | -0.70522 | 0.42814   | -1.580    | 0.1692    |
| 5nM-NA  | 6      | 0.43278  | 0.42814   | -0.442    | 1.3072    |
| -NA     | 6      | 0.10581  | 0.42814   | -0.769    | 0.9802    |
| 50nM+NA | 6      | 0.55657  | 0.42814   | -0.318    | 1.4309    |
| 5nM+NA  | 6      | -0.16787 | 0.42814   | -1.042    | 0.7065    |
| +NA     | 6      | -0.22207 | 0.42814   | -1.096    | 0.6523    |

Std Error uses a pooled estimate of error variance

**Means Comparisons**

**Comparisons with a control using Dunnett's Method**

**Oneway Analysis of N-acetyl-glutamine By Label**

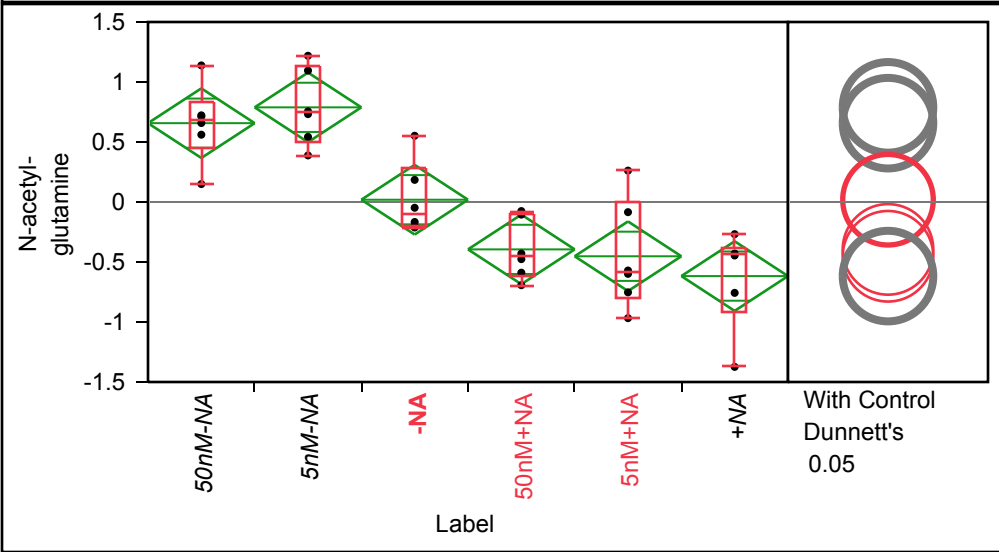

**Quantiles**

| Level   | Minimum  | 10%      | 25%      | Median   | 75%      | 90%      | Maximum  |
|---------|----------|----------|----------|----------|----------|----------|----------|
| 50nM-NA | 0.149349 | 0.149349 | 0.457955 | 0.68565  | 0.826099 | 1.138019 | 1.138019 |
| 5nM-NA  | 0.388124 | 0.388124 | 0.504413 | 0.743647 | 1.126171 | 1.218504 | 1.218504 |
| -NA     | -0.21246 | -0.21246 | -0.19997 | -0.10729 | 0.276341 | 0.551977 | 0.551977 |
| 50nM+NA | -0.69343 | -0.69343 | -0.61519 | -0.45309 | -0.09757 | -0.07567 | -0.07567 |
| 5nM+NA  | -0.9678  | -0.9678  | -0.80665 | -0.58493 | 0.001901 | 0.261517 | 0.261517 |
| +NA     | -1.37402 | -1.37402 | -0.91143 | -0.43804 | -0.38905 | -0.26803 | -0.26803 |

**Oneway Anova**

**Summary of Fit**

|                            |          |
|----------------------------|----------|
| Rsquare                    | 0.747965 |
| Adj Rsquare                | 0.705959 |
| Root Mean Square Error     | 0.347883 |
| Mean of Response           | -2.8e-10 |
| Observations (or Sum Wgts) | 36       |

**Analysis of Variance**

| Source   | DF | Sum of Squares | Mean Square | F Ratio | Prob > F |
|----------|----|----------------|-------------|---------|----------|
| Label    | 5  | 10.774739      | 2.15495     | 17.8062 | <.0001 * |
| Error    | 30 | 3.630671       | 0.12102     |         |          |
| C. Total | 35 | 14.405410      |             |         |          |

**Means for Oneway Anova**

| Level   | Number | Mean     | Std Error | Lower 95% | Upper 95% |
|---------|--------|----------|-----------|-----------|-----------|
| 50nM-NA | 6      | 0.65694  | 0.14202   | 0.3669    | 0.947     |
| 5nM-NA  | 6      | 0.78875  | 0.14202   | 0.4987    | 1.079     |
| -NA     | 6      | 0.01893  | 0.14202   | -0.2711   | 0.309     |
| 50nM+NA | 6      | -0.39488 | 0.14202   | -0.6849   | -0.105    |
| 5nM+NA  | 6      | -0.45228 | 0.14202   | -0.7423   | -0.162    |
| +NA     | 6      | -0.61746 | 0.14202   | -0.9075   | -0.327    |

Std Error uses a pooled estimate of error variance

**Means Comparisons**

**Comparisons with a control using Dunnett's Method**

**Oneway Analysis of N-Acetyl-L-alanine By Label**

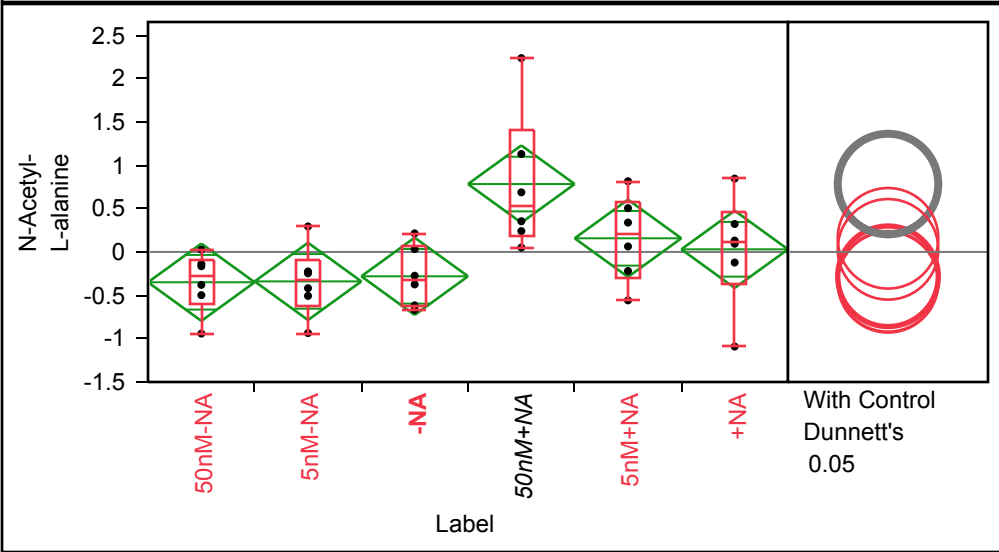

**Quantiles**

| Level   | Minimum  | 10%      | 25%      | Median   | 75%      | 90%      | Maximum  |
|---------|----------|----------|----------|----------|----------|----------|----------|
| 50nM-NA | -0.94145 | -0.94145 | -0.60917 | -0.27232 | -0.09826 | 0.026266 | 0.026266 |
| 5nM-NA  | -0.93571 | -0.93571 | -0.61416 | -0.33222 | -0.09556 | 0.293931 | 0.293931 |
| -NA     | -0.66779 | -0.66779 | -0.62895 | -0.32437 | 0.078055 | 0.214081 | 0.214081 |
| 50nM+NA | 0.050806 | 0.050806 | 0.193007 | 0.520616 | 1.405967 | 2.235752 | 2.235752 |
| 5nM+NA  | -0.55872 | -0.55872 | -0.30445 | 0.201073 | 0.582785 | 0.81535  | 0.81535  |
| +NA     | -1.09117 | -1.09117 | -0.3645  | 0.112801 | 0.45333  | 0.845724 | 0.845724 |

**Oneway Anova**

**Summary of Fit**

|                            |          |
|----------------------------|----------|
| Rsquare                    | 0.40077  |
| Adj Rsquare                | 0.300898 |
| Root Mean Square Error     | 0.534483 |
| Mean of Response           | -2.8e-10 |
| Observations (or Sum Wgts) | 36       |

**Analysis of Variance**

| Source   | DF | Sum of Squares | Mean Square | F Ratio | Prob > F |
|----------|----|----------------|-------------|---------|----------|
| Label    | 5  | 5.731776       | 1.14636     | 4.0128  | 0.0066 * |
| Error    | 30 | 8.570150       | 0.28567     |         |          |
| C. Total | 35 | 14.301925      |             |         |          |

**Means for Oneway Anova**

| Level   | Number | Mean     | Std Error | Lower 95% | Upper 95% |
|---------|--------|----------|-----------|-----------|-----------|
| 50nM-NA | 6      | -0.34967 | 0.21820   | -0.7953   | 0.0960    |
| 5nM-NA  | 6      | -0.33977 | 0.21820   | -0.7854   | 0.1059    |
| -NA     | 6      | -0.28096 | 0.21820   | -0.7266   | 0.1647    |
| 50nM+NA | 6      | 0.78293  | 0.21820   | 0.3373    | 1.2286    |
| 5nM+NA  | 6      | 0.15739  | 0.21820   | -0.2882   | 0.6030    |
| +NA     | 6      | 0.03007  | 0.21820   | -0.4156   | 0.4757    |

Std Error uses a pooled estimate of error variance

**Means Comparisons**

**Comparisons with a control using Dunnnett's Method**

**Oneway Analysis of N-acetyl-L-ornithine By Label**

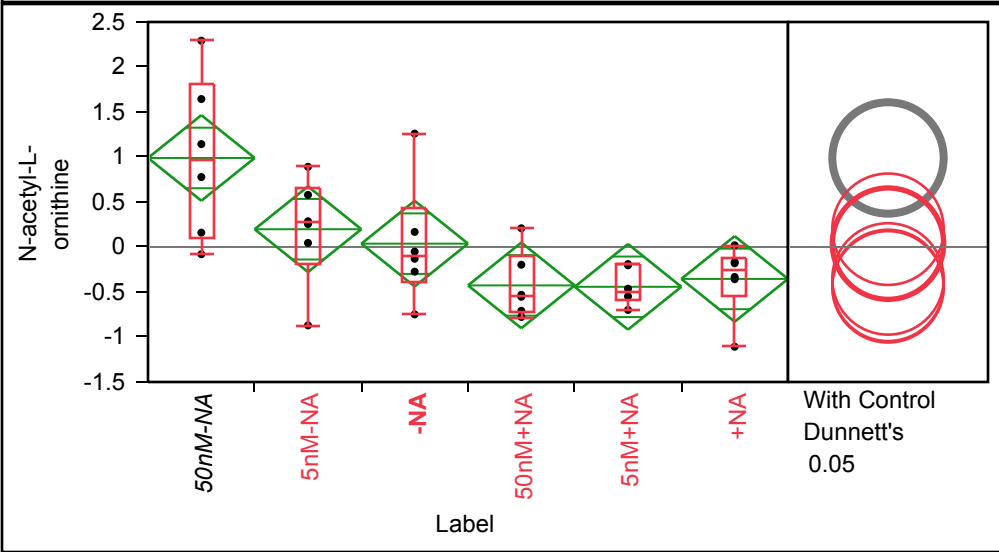

**Quantiles**

| Level   | Minimum  | 10%      | 25%      | Median   | 75%      | 90%      | Maximum  |
|---------|----------|----------|----------|----------|----------|----------|----------|
| 50nM-NA | -0.0805  | -0.0805  | 0.099595 | 0.960043 | 1.806041 | 2.292351 | 2.292351 |
| 5nM-NA  | -0.87059 | -0.87059 | -0.1839  | 0.269925 | 0.657248 | 0.890848 | 0.890848 |
| -NA     | -0.74892 | -0.74892 | -0.39287 | -0.09099 | 0.440681 | 1.259964 | 1.259964 |
| 50nM+NA | -0.77797 | -0.77797 | -0.72592 | -0.54228 | -0.09586 | 0.207951 | 0.207951 |
| 5nM+NA  | -0.69906 | -0.69906 | -0.58701 | -0.50622 | -0.19958 | -0.18964 | -0.18964 |
| +NA     | -1.10806 | -1.10806 | -0.54548 | -0.2572  | -0.12056 | 0.019034 | 0.019034 |

**Oneway Anova**

**Summary of Fit**

|                            |          |
|----------------------------|----------|
| Rsquare                    | 0.483426 |
| Adj Rsquare                | 0.39733  |
| Root Mean Square Error     | 0.570421 |
| Mean of Response           | 2.78e-10 |
| Observations (or Sum Wgts) | 36       |

**Analysis of Variance**

| Source   | DF | Sum of Squares | Mean Square | F Ratio | Prob > F |
|----------|----|----------------|-------------|---------|----------|
| Label    | 5  | 9.135038       | 1.82701     | 5.6150  | 0.0009 * |
| Error    | 30 | 9.761416       | 0.32538     |         |          |
| C. Total | 35 | 18.896454      |             |         |          |

**Means for Oneway Anova**

| Level   | Number | Mean     | Std Error | Lower 95% | Upper 95% |
|---------|--------|----------|-----------|-----------|-----------|
| 50nM-NA | 6      | 0.98925  | 0.23287   | 0.5137    | 1.4648    |
| 5nM-NA  | 6      | 0.19741  | 0.23287   | -0.2782   | 0.6730    |
| -NA     | 6      | 0.03708  | 0.23287   | -0.4385   | 0.5127    |
| 50nM+NA | 6      | -0.42671 | 0.23287   | -0.9023   | 0.0489    |
| 5nM+NA  | 6      | -0.44228 | 0.23287   | -0.9179   | 0.0333    |
| +NA     | 6      | -0.35474 | 0.23287   | -0.8303   | 0.1208    |

Std Error uses a pooled estimate of error variance

**Means Comparisons**

**Comparisons with a control using Dunnett's Method**

**Oneway Analysis of N-Acetylputrescine By Label**

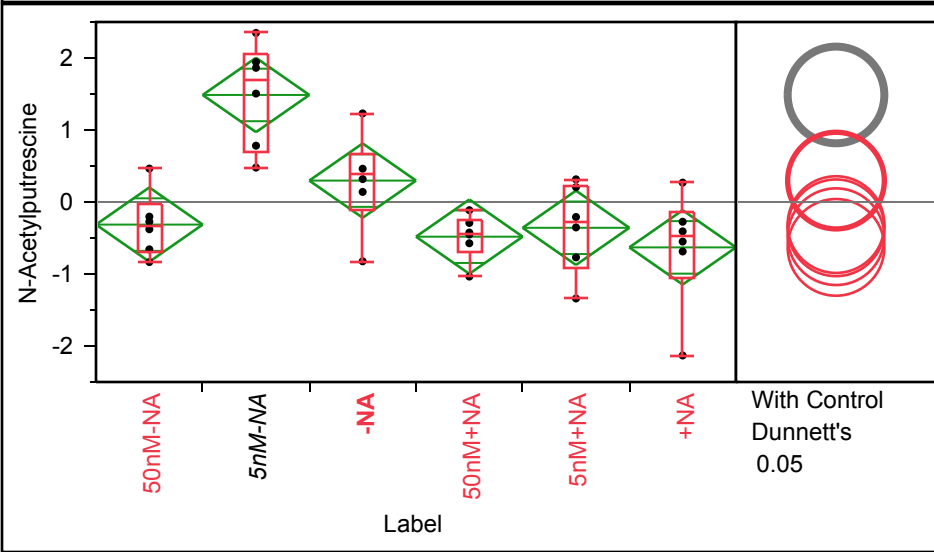

**Quantiles**

| Level   | Minimum  | 10%      | 25%      | Median   | 75%      | 90%      | Maximum  |
|---------|----------|----------|----------|----------|----------|----------|----------|
| 50nM-NA | -0.8339  | -0.8339  | -0.70173 | -0.32594 | -0.03665 | 0.46401  | 0.46401  |
| 5nM-NA  | 0.477884 | 0.477884 | 0.705997 | 1.684603 | 2.044639 | 2.348161 | 2.348161 |
| -NA     | -0.8235  | -0.8235  | -0.10092 | 0.387743 | 0.654163 | 1.230231 | 1.230231 |
| 50nM+NA | -1.03595 | -1.03595 | -0.68885 | -0.43826 | -0.24682 | -0.11396 | -0.11396 |
| 5nM+NA  | -1.33994 | -1.33994 | -0.91199 | -0.28064 | 0.233243 | 0.314764 | 0.314764 |
| +NA     | -2.13169 | -2.13169 | -1.04832 | -0.4787  | -0.13843 | 0.268818 | 0.268818 |

**Oneway Anova**

**Summary of Fit**

|                            |          |
|----------------------------|----------|
| Rsquare                    | 0.622299 |
| Adj Rsquare                | 0.559348 |
| Root Mean Square Error     | 0.618876 |
| Mean of Response           | 5.556e-9 |
| Observations (or Sum Wgts) | 36       |

**Analysis of Variance**

| Source   | DF | Sum of Squares | Mean Square | F Ratio | Prob > F |
|----------|----|----------------|-------------|---------|----------|
| Label    | 5  | 18.931233      | 3.78625     | 9.8856  | <.0001 * |
| Error    | 30 | 11.490229      | 0.38301     |         |          |
| C. Total | 35 | 30.421461      |             |         |          |

**Means for Oneway Anova**

| Level   | Number | Mean    | Std Error | Lower 95% | Upper 95% |
|---------|--------|---------|-----------|-----------|-----------|
| 50nM-NA | 6      | -0.3138 | 0.25266   | -0.830    | 0.202     |
| 5nM-NA  | 6      | 1.4868  | 0.25266   | 0.971     | 2.003     |
| -NA     | 6      | 0.2974  | 0.25266   | -0.219    | 0.813     |
| 50nM+NA | 6      | -0.4818 | 0.25266   | -0.998    | 0.034     |
| 5nM+NA  | 6      | -0.3583 | 0.25266   | -0.874    | 0.158     |
| +NA     | 6      | -0.6303 | 0.25266   | -1.146    | -0.114    |

Std Error uses a pooled estimate of error variance

**Means Comparisons**

**Comparisons with a control using Dunnett's Method**

**Oneway Analysis of NAD By Label**

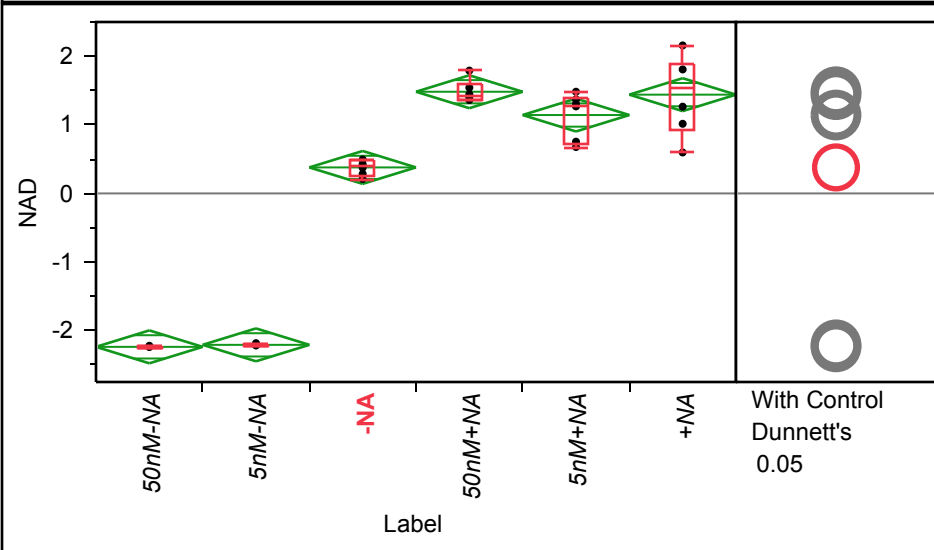

**Quantiles**

| Level   | Minimum  | 10%      | 25%      | Median   | 75%      | 90%      | Maximum  |
|---------|----------|----------|----------|----------|----------|----------|----------|
| 50nM-NA | -2.24897 | -2.24897 | -2.24516 | -2.24183 | -2.22549 | -2.22207 | -2.22207 |
| 5nM-NA  | -2.22141 | -2.22141 | -2.21851 | -2.21226 | -2.19762 | -2.1839  | -2.1839  |
| -NA     | 0.209614 | 0.209614 | 0.26634  | 0.401602 | 0.48611  | 0.494455 | 0.494455 |
| 50nM+NA | 1.351313 | 1.351313 | 1.359352 | 1.425506 | 1.604079 | 1.791009 | 1.791009 |
| 5nM+NA  | 0.676387 | 0.676387 | 0.735092 | 1.287275 | 1.398977 | 1.482671 | 1.482671 |
| +NA     | 0.597507 | 0.597507 | 0.910913 | 1.53172  | 1.895627 | 2.157939 | 2.157939 |

**Oneway Anova**

**Summary of Fit**

|                            |          |
|----------------------------|----------|
| Rsquare                    | 0.97418  |
| Adj Rsquare                | 0.969877 |
| Root Mean Square Error     | 0.287631 |
| Mean of Response           | -2.78e-9 |
| Observations (or Sum Wgts) | 36       |

**Analysis of Variance**

| Source   | DF | Sum of Squares | Mean Square | F Ratio  | Prob > F |
|----------|----|----------------|-------------|----------|----------|
| Label    | 5  | 93.644818      | 18.7290     | 226.3822 | <.0001 * |
| Error    | 30 | 2.481948       | 0.0827      |          |          |
| C. Total | 35 | 96.126766      |             |          |          |

**Means for Oneway Anova**

| Level   | Number | Mean    | Std Error | Lower 95% | Upper 95% |
|---------|--------|---------|-----------|-----------|-----------|
| 50nM-NA | 6      | -2.2375 | 0.11742   | -2.477    | -1.998    |
| 5nM-NA  | 6      | -2.2083 | 0.11742   | -2.448    | -1.968    |
| -NA     | 6      | 0.3793  | 0.11742   | 0.139     | 0.619     |
| 50nM+NA | 6      | 1.4829  | 0.11742   | 1.243     | 1.723     |
| 5nM+NA  | 6      | 1.1432  | 0.11742   | 0.903     | 1.383     |
| +NA     | 6      | 1.4404  | 0.11742   | 1.201     | 1.680     |

Std Error uses a pooled estimate of error variance

**Means Comparisons**

**Comparisons with a control using Dunnett's Method**



**Oneway Analysis of NADH By Label**

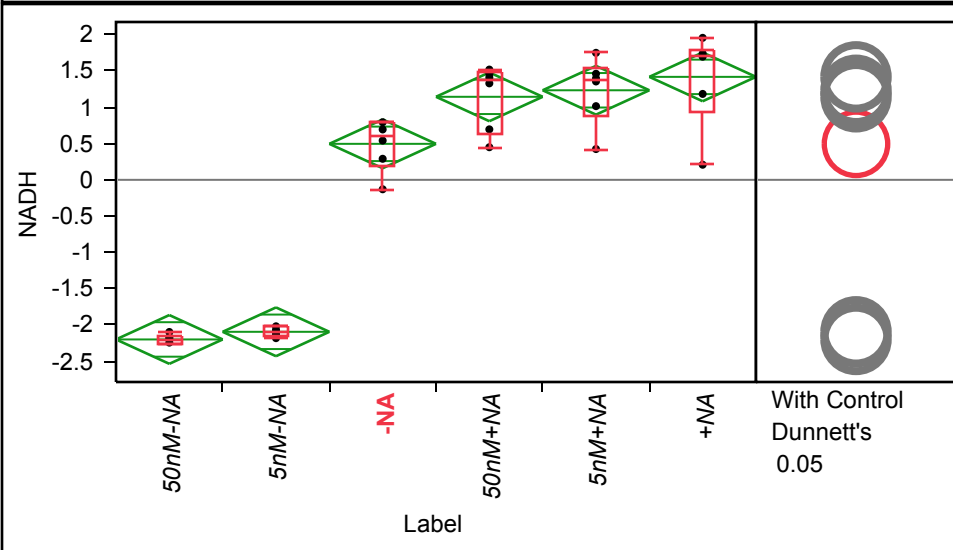

**Quantiles**

| Level   | Minimum  | 10%      | 25%      | Median   | 75%      | 90%      | Maximum  |
|---------|----------|----------|----------|----------|----------|----------|----------|
| 50nM-NA | -2.25544 | -2.25544 | -2.24921 | -2.21527 | -2.14888 | -2.09643 | -2.09643 |
| 5nM-NA  | -2.18142 | -2.18142 | -2.15465 | -2.09803 | -2.02195 | -2.01832 | -2.01832 |
| -NA     | -0.13001 | -0.13001 | 0.185121 | 0.617777 | 0.788719 | 0.793657 | 0.793657 |
| 50nM+NA | 0.449379 | 0.449379 | 0.634142 | 1.369918 | 1.475598 | 1.519395 | 1.519395 |
| 5nM+NA  | 0.424097 | 0.424097 | 0.867603 | 1.376716 | 1.5339   | 1.750207 | 1.750207 |
| +NA     | 0.208154 | 0.208154 | 0.939953 | 1.712849 | 1.793727 | 1.956698 | 1.956698 |

**Oneway Anova**

**Summary of Fit**

|                            |          |
|----------------------------|----------|
| Rsquare                    | 0.946326 |
| Adj Rsquare                | 0.937381 |
| Root Mean Square Error     | 0.402958 |
| Mean of Response           | -2.78e-9 |
| Observations (or Sum Wgts) | 36       |

**Analysis of Variance**

| Source   | DF | Sum of Squares | Mean Square | F Ratio  | Prob > F |
|----------|----|----------------|-------------|----------|----------|
| Label    | 5  | 85.885721      | 17.1771     | 105.7867 | <.0001 * |
| Error    | 30 | 4.871260       | 0.1624      |          |          |
| C. Total | 35 | 90.756981      |             |          |          |

**Means for Oneway Anova**

| Level   | Number | Mean    | Std Error | Lower 95% | Upper 95% |
|---------|--------|---------|-----------|-----------|-----------|
| 50nM-NA | 6      | -2.1993 | 0.16451   | -2.535    | -1.863    |
| 5nM-NA  | 6      | -2.0941 | 0.16451   | -2.430    | -1.758    |
| -NA     | 6      | 0.4961  | 0.16451   | 0.160     | 0.832     |
| 50nM+NA | 6      | 1.1442  | 0.16451   | 0.808     | 1.480     |
| 5nM+NA  | 6      | 1.2342  | 0.16451   | 0.898     | 1.570     |
| +NA     | 6      | 1.4190  | 0.16451   | 1.083     | 1.755     |

Std Error uses a pooled estimate of error variance

**Means Comparisons**

**Comparisons with a control using Dunnnett's Method**

**Oneway Analysis of NADP+ By Label**

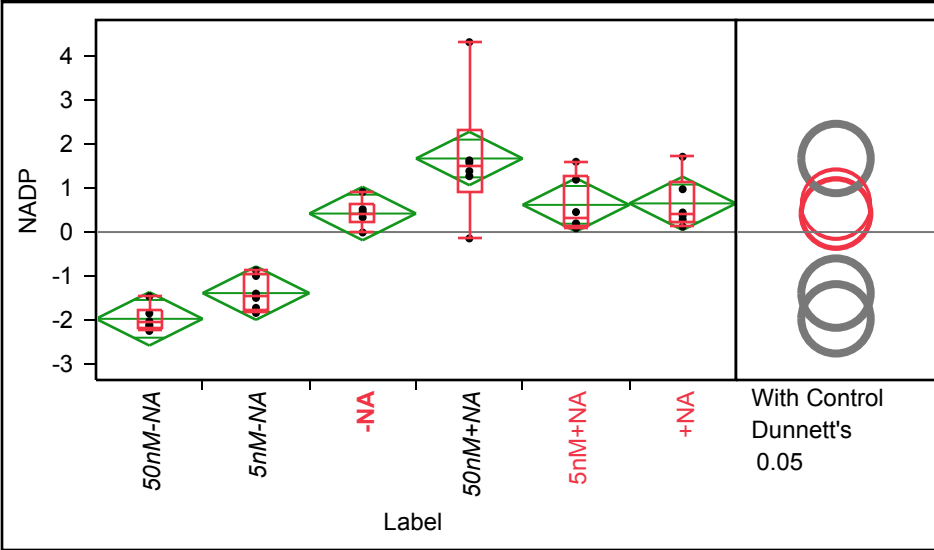

**Quantiles**

| Level   | Minimum  | 10%      | 25%      | Median   | 75%      | 90%      | Maximum  |
|---------|----------|----------|----------|----------|----------|----------|----------|
| 50nM-NA | -2.25251 | -2.25251 | -2.17287 | -2.07015 | -1.75686 | -1.46487 | -1.46487 |
| 5nM-NA  | -1.84284 | -1.84284 | -1.75528 | -1.45125 | -0.9682  | -0.87254 | -0.87254 |
| -NA     | -0.01029 | -0.01029 | 0.234566 | 0.395118 | 0.616979 | 0.913401 | 0.913401 |
| 50nM+NA | -0.14542 | -0.14542 | 0.917224 | 1.484561 | 2.304887 | 4.323327 | 4.323327 |
| 5nM+NA  | 0.08732  | 0.08732  | 0.157226 | 0.325706 | 1.294124 | 1.600833 | 1.600833 |
| +NA     | 0.125014 | 0.125014 | 0.244009 | 0.407463 | 1.159547 | 1.713533 | 1.713533 |

**Oneway Anova**

**Summary of Fit**

|                            |          |
|----------------------------|----------|
| Rsquare                    | 0.783878 |
| Adj Rsquare                | 0.747857 |
| Root Mean Square Error     | 0.728756 |
| Mean of Response           | 2.78e-10 |
| Observations (or Sum Wgts) | 36       |

**Analysis of Variance**

| Source   | DF | Sum of Squares | Mean Square | F Ratio | Prob > F |
|----------|----|----------------|-------------|---------|----------|
| Label    | 5  | 57.787607      | 11.5575     | 21.7621 | <.0001 * |
| Error    | 30 | 15.932575      | 0.5311      |         |          |
| C. Total | 35 | 73.720182      |             |         |          |

**Means for Oneway Anova**

| Level   | Number | Mean    | Std Error | Lower 95% | Upper 95% |
|---------|--------|---------|-----------|-----------|-----------|
| 50nM-NA | 6      | -1.9764 | 0.29751   | -2.584    | -1.369    |
| 5nM-NA  | 6      | -1.3907 | 0.29751   | -1.998    | -0.783    |
| -NA     | 6      | 0.4213  | 0.29751   | -0.186    | 1.029     |
| 50nM+NA | 6      | 1.6751  | 0.29751   | 1.067     | 2.283     |
| 5nM+NA  | 6      | 0.6187  | 0.29751   | 0.011     | 1.226     |
| +NA     | 6      | 0.6520  | 0.29751   | 0.044     | 1.260     |

Std Error uses a pooled estimate of error variance

**Means Comparisons**

**Comparisons with a control using Dunnett's Method**

**Oneway Analysis of N-carbamoyl-L-aspartate By Label**

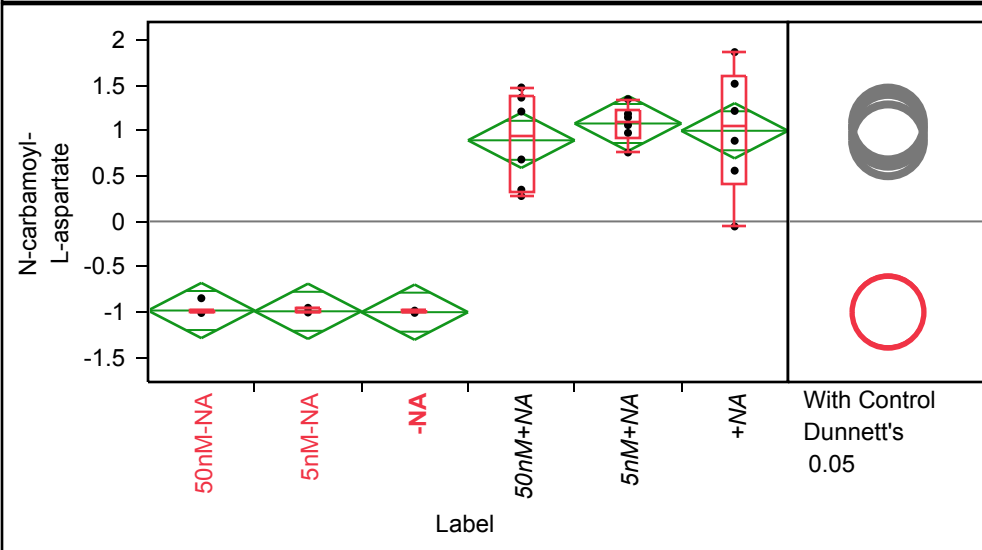

**Quantiles**

| Level   | Minimum  | 10%      | 25%      | Median   | 75%      | 90%      | Maximum  |
|---------|----------|----------|----------|----------|----------|----------|----------|
| 50nM-NA | -1.00729 | -1.00729 | -1.00729 | -1.00728 | -0.96671 | -0.84503 | -0.84503 |
| 5nM-NA  | -1.0073  | -1.0073  | -1.00729 | -1.00458 | -0.95687 | -0.95083 | -0.95083 |
| -NA     | -1.00729 | -1.00729 | -1.00729 | -1.00654 | -0.98188 | -0.98161 | -0.98161 |
| 50nM+NA | 0.279615 | 0.279615 | 0.331556 | 0.94531  | 1.390222 | 1.473899 | 1.473899 |
| 5nM+NA  | 0.758894 | 0.758894 | 0.920197 | 1.102323 | 1.224004 | 1.34458  | 1.34458  |
| +NA     | -0.0554  | -0.0554  | 0.405075 | 1.051909 | 1.601939 | 1.862975 | 1.862975 |

**Oneway Anova**

**Summary of Fit**

|                            |          |
|----------------------------|----------|
| Rsquare                    | 0.898792 |
| Adj Rsquare                | 0.881924 |
| Root Mean Square Error     | 0.364174 |
| Mean of Response           | 2.778e-9 |
| Observations (or Sum Wgts) | 36       |

**Analysis of Variance**

| Source   | DF | Sum of Squares | Mean Square | F Ratio | Prob > F |
|----------|----|----------------|-------------|---------|----------|
| Label    | 5  | 35.333050      | 7.06661     | 53.2837 | <.0001 * |
| Error    | 30 | 3.978674       | 0.13262     |         |          |
| C. Total | 35 | 39.311724      |             |         |          |

**Means for Oneway Anova**

| Level   | Number | Mean    | Std Error | Lower 95% | Upper 95% |
|---------|--------|---------|-----------|-----------|-----------|
| 50nM-NA | 6      | -0.9802 | 0.14867   | -1.284    | -0.677    |
| 5nM-NA  | 6      | -0.9889 | 0.14867   | -1.293    | -0.685    |
| -NA     | 6      | -0.9985 | 0.14867   | -1.302    | -0.695    |
| 50nM+NA | 6      | 0.8926  | 0.14867   | 0.589     | 1.196     |
| 5nM+NA  | 6      | 1.0776  | 0.14867   | 0.774     | 1.381     |
| +NA     | 6      | 0.9975  | 0.14867   | 0.694     | 1.301     |

Std Error uses a pooled estimate of error variance

**Means Comparisons**

**Comparisons with a control using Dunnett's Method**

**Oneway Analysis of N-Formylglycinamide ribonucleotide By Label**

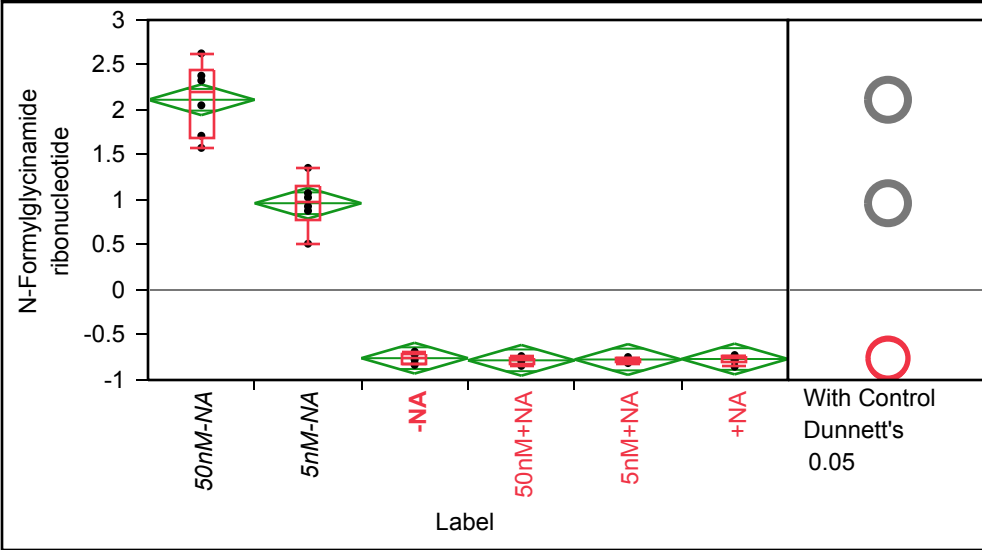

**Quantiles**

| Level   | Minimum  | 10%      | 25%      | Median   | 75%      | 90%      | Maximum  |
|---------|----------|----------|----------|----------|----------|----------|----------|
| 50nM-NA | 1.578984 | 1.578984 | 1.679948 | 2.189743 | 2.443306 | 2.628926 | 2.628926 |
| 5nM-NA  | 0.514312 | 0.514312 | 0.788469 | 0.978665 | 1.146593 | 1.356577 | 1.356577 |
| -NA     | -0.83259 | -0.83259 | -0.82116 | -0.74706 | -0.70842 | -0.68466 | -0.68466 |
| 50nM+NA | -0.84318 | -0.84318 | -0.82617 | -0.77131 | -0.74456 | -0.73437 | -0.73437 |
| 5nM+NA  | -0.81212 | -0.81212 | -0.79499 | -0.76825 | -0.74879 | -0.74513 | -0.74513 |
| +NA     | -0.85184 | -0.85184 | -0.80675 | -0.75356 | -0.72575 | -0.72304 | -0.72304 |

**Oneway Anova**

**Summary of Fit**

|                            |          |
|----------------------------|----------|
| Rsquare                    | 0.973734 |
| Adj Rsquare                | 0.969356 |
| Root Mean Square Error     | 0.204687 |
| Mean of Response           | -8.33e-9 |
| Observations (or Sum Wgts) | 36       |

**Analysis of Variance**

| Source   | DF | Sum of Squares | Mean Square | F Ratio  | Prob > F |
|----------|----|----------------|-------------|----------|----------|
| Label    | 5  | 46.595972      | 9.31919     | 222.4328 | <.0001 * |
| Error    | 30 | 1.256900       | 0.04190     |          |          |
| C. Total | 35 | 47.852872      |             |          |          |

**Means for Oneway Anova**

| Level   | Number | Mean    | Std Error | Lower 95% | Upper 95% |
|---------|--------|---------|-----------|-----------|-----------|
| 50nM-NA | 6      | 2.1137  | 0.08356   | 1.943     | 2.284     |
| 5nM-NA  | 6      | 0.9641  | 0.08356   | 0.793     | 1.135     |
| -NA     | 6      | -0.7575 | 0.08356   | -0.928    | -0.587    |
| 50nM+NA | 6      | -0.7814 | 0.08356   | -0.952    | -0.611    |
| 5nM+NA  | 6      | -0.7722 | 0.08356   | -0.943    | -0.602    |
| +NA     | 6      | -0.7667 | 0.08356   | -0.937    | -0.596    |

Std Error uses a pooled estimate of error variance

**Means Comparisons**

**Comparisons with a control using Dunnnett's Method**

**Oneway Analysis of Ng,NG-dimethyl-L-arginine By Label**

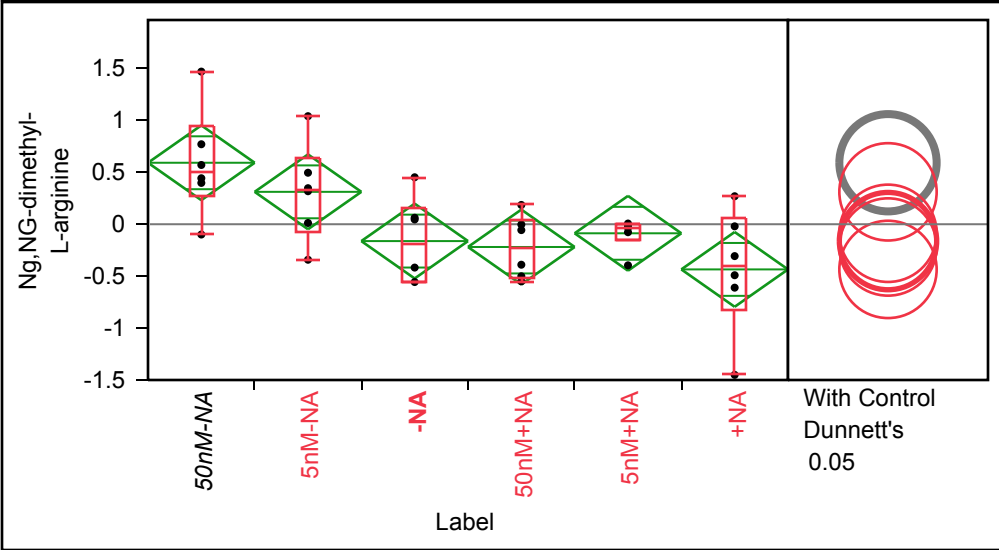

**Quantiles**

| Level   | Minimum  | 10%      | 25%      | Median   | 75%      | 90%      | Maximum  |
|---------|----------|----------|----------|----------|----------|----------|----------|
| 50nM-NA | -0.09913 | -0.09913 | 0.273615 | 0.50663  | 0.945038 | 1.469638 | 1.469638 |
| 5nM-NA  | -0.34194 | -0.34194 | -0.07632 | 0.332408 | 0.631947 | 1.040386 | 1.040386 |
| -NA     | -0.56029 | -0.56029 | -0.55765 | -0.18576 | 0.159774 | 0.452268 | 0.452268 |
| 50nM+NA | -0.55018 | -0.55018 | -0.51344 | -0.22326 | 0.044297 | 0.185686 | 0.185686 |
| 5nM+NA  | -0.39577 | -0.39577 | -0.1566  | -0.02757 | -0.00033 | 0.006646 | 0.006646 |
| +NA     | -1.45054 | -1.45054 | -0.82077 | -0.39906 | 0.052211 | 0.269494 | 0.269494 |

**Oneway Anova**

**Summary of Fit**

|                            |          |
|----------------------------|----------|
| Rsquare                    | 0.435227 |
| Adj Rsquare                | 0.341098 |
| Root Mean Square Error     | 0.431965 |
| Mean of Response           | -2.5e-17 |
| Observations (or Sum Wgts) | 36       |

**Analysis of Variance**

| Source   | DF | Sum of Squares | Mean Square | F Ratio | Prob > F |
|----------|----|----------------|-------------|---------|----------|
| Label    | 5  | 4.3137945      | 0.862759    | 4.6237  | 0.0030 * |
| Error    | 30 | 5.5978086      | 0.186594    |         |          |
| C. Total | 35 | 9.9116031      |             |         |          |

**Means for Oneway Anova**

| Level   | Number | Mean     | Std Error | Lower 95% | Upper 95% |
|---------|--------|----------|-----------|-----------|-----------|
| 50nM-NA | 6      | 0.59197  | 0.17635   | 0.2318    | 0.9521    |
| 5nM-NA  | 6      | 0.31188  | 0.17635   | -0.0483   | 0.6720    |
| -NA     | 6      | -0.16234 | 0.17635   | -0.5225   | 0.1978    |
| 50nM+NA | 6      | -0.21917 | 0.17635   | -0.5793   | 0.1410    |
| 5nM+NA  | 6      | -0.08730 | 0.17635   | -0.4475   | 0.2729    |
| +NA     | 6      | -0.43504 | 0.17635   | -0.7952   | -0.0749   |

Std Error uses a pooled estimate of error variance

**Means Comparisons**

**Comparisons with a control using Dunnnett's Method**

**Oneway Analysis of Nicotinamide By Label**

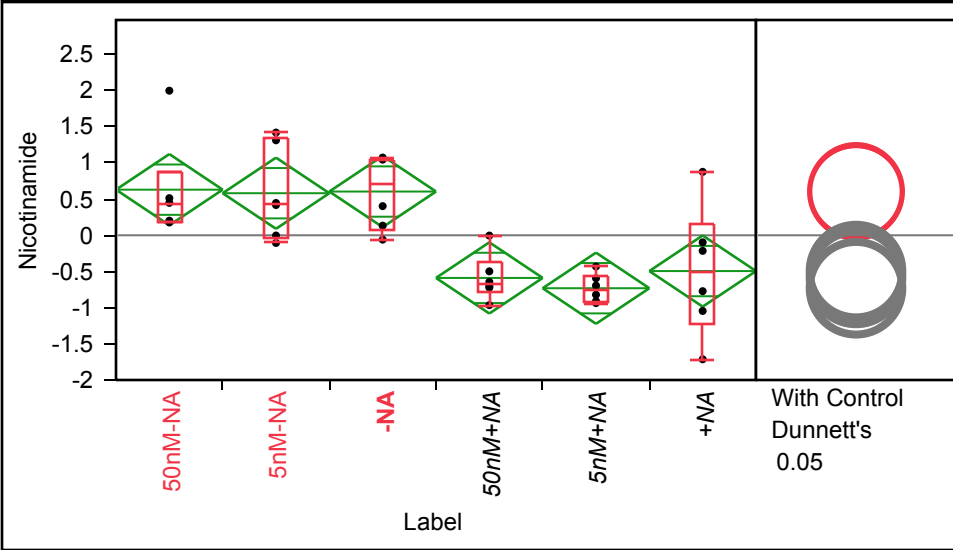

**Quantiles**

| Level   | Minimum  | 10%      | 25%      | Median   | 75%      | 90%      | Maximum  |
|---------|----------|----------|----------|----------|----------|----------|----------|
| 50nM-NA | 0.177646 | 0.177646 | 0.195933 | 0.44531  | 0.884358 | 1.998141 | 1.998141 |
| 5nM-NA  | -0.1059  | -0.1059  | -0.02887 | 0.432061 | 1.339371 | 1.419294 | 1.419294 |
| -NA     | -0.06032 | -0.06032 | 0.084474 | 0.717513 | 1.052479 | 1.073869 | 1.073869 |
| 50nM+NA | -0.96516 | -0.96516 | -0.78368 | -0.67266 | -0.3751  | -0.00445 | -0.00445 |
| 5nM+NA  | -0.93696 | -0.93696 | -0.91738 | -0.75851 | -0.55324 | -0.43205 | -0.43205 |
| +NA     | -1.71358 | -1.71358 | -1.21267 | -0.49382 | 0.145915 | 0.876627 | 0.876627 |

**Oneway Anova**

**Summary of Fit**

|                            |          |
|----------------------------|----------|
| Rsquare                    | 0.561477 |
| Adj Rsquare                | 0.488389 |
| Root Mean Square Error     | 0.589927 |
| Mean of Response           | 2.78e-11 |
| Observations (or Sum Wgts) | 36       |

**Analysis of Variance**

| Source   | DF | Sum of Squares | Mean Square | F Ratio | Prob > F |
|----------|----|----------------|-------------|---------|----------|
| Label    | 5  | 13.367723      | 2.67354     | 7.6823  | <.0001 * |
| Error    | 30 | 10.440430      | 0.34801     |         |          |
| C. Total | 35 | 23.808153      |             |         |          |

**Means for Oneway Anova**

| Level   | Number | Mean     | Std Error | Lower 95% | Upper 95% |
|---------|--------|----------|-----------|-----------|-----------|
| 50nM-NA | 6      | 0.63026  | 0.24084   | 0.138     | 1.122     |
| 5nM-NA  | 6      | 0.58117  | 0.24084   | 0.089     | 1.073     |
| -NA     | 6      | 0.60444  | 0.24084   | 0.113     | 1.096     |
| 50nM+NA | 6      | -0.58946 | 0.24084   | -1.081    | -0.098    |
| 5nM+NA  | 6      | -0.73176 | 0.24084   | -1.224    | -0.240    |
| +NA     | 6      | -0.49466 | 0.24084   | -0.987    | -0.0028   |

Std Error uses a pooled estimate of error variance

**Means Comparisons**

**Comparisons with a control using Dunnett's Method**

**Oneway Analysis of Nicotinamide ribotide By Label**

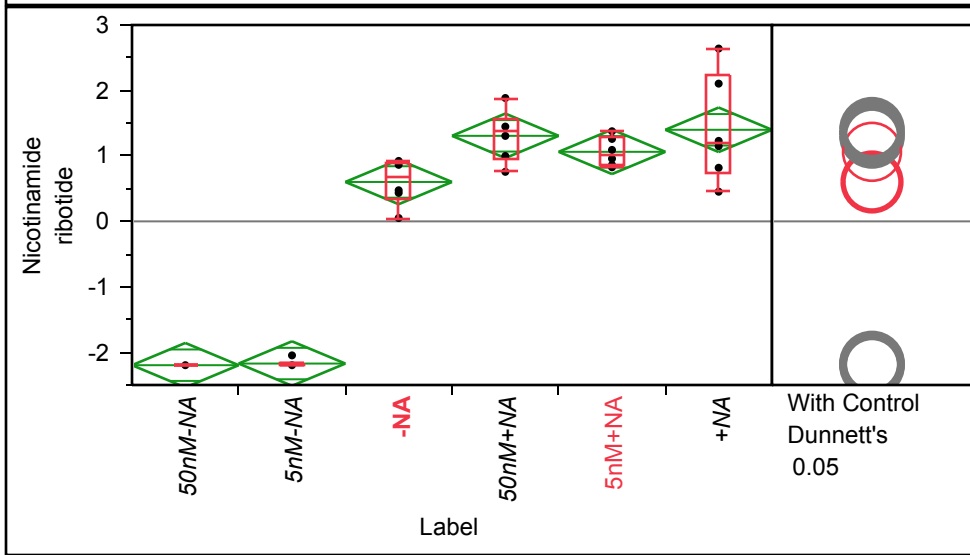

**Quantiles**

| Level   | Minimum  | 10%      | 25%      | Median   | 75%      | 90%      | Maximum  |
|---------|----------|----------|----------|----------|----------|----------|----------|
| 50nM-NA | -2.19747 | -2.19747 | -2.19747 | -2.19747 | -2.19746 | -2.19746 | -2.19746 |
| 5nM-NA  | -2.19748 | -2.19748 | -2.19748 | -2.19747 | -2.15997 | -2.04749 | -2.04749 |
| -NA     | 0.051029 | 0.051029 | 0.338819 | 0.66921  | 0.878556 | 0.923129 | 0.923129 |
| 50nM+NA | 0.756894 | 0.756894 | 0.938281 | 1.375793 | 1.557227 | 1.884543 | 1.884543 |
| 5nM+NA  | 0.826685 | 0.826685 | 0.853419 | 1.024606 | 1.288926 | 1.376602 | 1.376602 |
| +NA     | 0.452982 | 0.452982 | 0.727049 | 1.189176 | 2.238305 | 2.640088 | 2.640088 |

**Oneway Anova**

**Summary of Fit**

|                            |          |
|----------------------------|----------|
| Rsquare                    | 0.946539 |
| Adj Rsquare                | 0.937629 |
| Root Mean Square Error     | 0.407551 |
| Mean of Response           | 2.778e-9 |
| Observations (or Sum Wgts) | 36       |

**Analysis of Variance**

| Source   | DF | Sum of Squares | Mean Square | F Ratio  | Prob > F |
|----------|----|----------------|-------------|----------|----------|
| Label    | 5  | 88.224461      | 17.6449     | 106.2322 | <.0001 * |
| Error    | 30 | 4.982923       | 0.1661      |          |          |
| C. Total | 35 | 93.207384      |             |          |          |

**Means for Oneway Anova**

| Level   | Number | Mean    | Std Error | Lower 95% | Upper 95% |
|---------|--------|---------|-----------|-----------|-----------|
| 50nM-NA | 6      | -2.1975 | 0.16638   | -2.537    | -1.858    |
| 5nM-NA  | 6      | -2.1725 | 0.16638   | -2.512    | -1.833    |
| -NA     | 6      | 0.6018  | 0.16638   | 0.262     | 0.942     |
| 50nM+NA | 6      | 1.3066  | 0.16638   | 0.967     | 1.646     |
| 5nM+NA  | 6      | 1.0624  | 0.16638   | 0.723     | 1.402     |
| +NA     | 6      | 1.3990  | 0.16638   | 1.059     | 1.739     |

Std Error uses a pooled estimate of error variance

**Means Comparisons**

**Comparisons with a control using Dunnett's Method**

**Oneway Analysis of Nicotinic acid By Label**

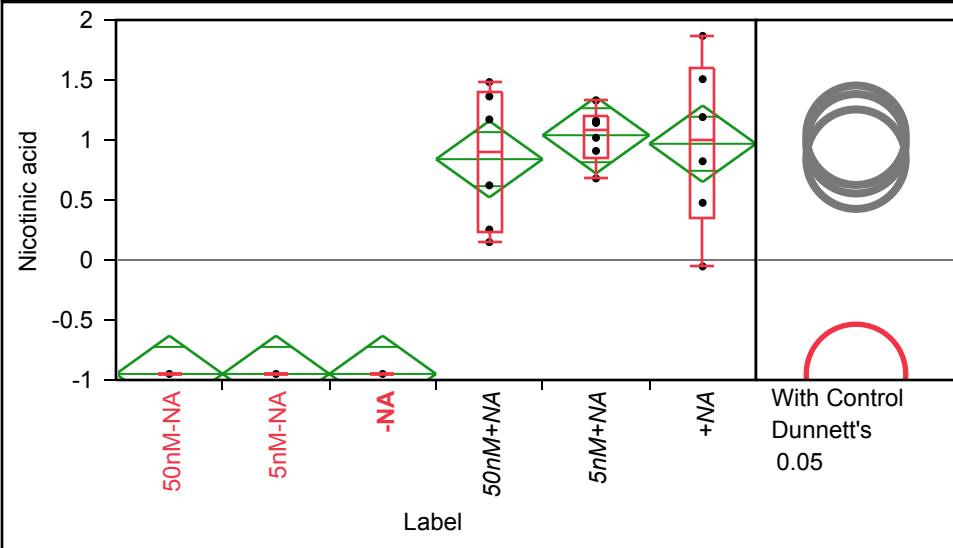

**Quantiles**

| Level   | Minimum  | 10%      | 25%      | Median   | 75%      | 90%      | Maximum  |
|---------|----------|----------|----------|----------|----------|----------|----------|
| 50nM-NA | -0.94949 | -0.94949 | -0.94949 | -0.94948 | -0.94947 | -0.94947 | -0.94947 |
| 5nM-NA  | -0.9495  | -0.9495  | -0.94949 | -0.94948 | -0.94948 | -0.94947 | -0.94947 |
| -NA     | -0.9495  | -0.9495  | -0.94949 | -0.94949 | -0.94949 | -0.94949 | -0.94949 |
| 50nM+NA | 0.149068 | 0.149068 | 0.227598 | 0.896574 | 1.392743 | 1.482626 | 1.482626 |
| 5nM+NA  | 0.679874 | 0.679874 | 0.851666 | 1.080129 | 1.202779 | 1.328627 | 1.328627 |
| +NA     | -0.05373 | -0.05373 | 0.343848 | 1.006826 | 1.597139 | 1.867473 | 1.867473 |

**Oneway Anova**

**Summary of Fit**

|                            |          |
|----------------------------|----------|
| Rsquare                    | 0.881576 |
| Adj Rsquare                | 0.861838 |
| Root Mean Square Error     | 0.381934 |
| Mean of Response           | 8.33e-10 |
| Observations (or Sum Wgts) | 36       |

**Analysis of Variance**

| Source   | DF | Sum of Squares | Mean Square | F Ratio | Prob > F |
|----------|----|----------------|-------------|---------|----------|
| Label    | 5  | 32.577401      | 6.51548     | 44.6653 | <.0001 * |
| Error    | 30 | 4.376201       | 0.14587     |         |          |
| C. Total | 35 | 36.953603      |             |         |          |

**Means for Oneway Anova**

| Level   | Number | Mean    | Std Error | Lower 95% | Upper 95% |
|---------|--------|---------|-----------|-----------|-----------|
| 50nM-NA | 6      | -0.9495 | 0.15592   | -1.268    | -0.631    |
| 5nM-NA  | 6      | -0.9495 | 0.15592   | -1.268    | -0.631    |
| -NA     | 6      | -0.9495 | 0.15592   | -1.268    | -0.631    |
| 50nM+NA | 6      | 0.8402  | 0.15592   | 0.522     | 1.159     |
| 5nM+NA  | 6      | 1.0398  | 0.15592   | 0.721     | 1.358     |
| +NA     | 6      | 0.9685  | 0.15592   | 0.650     | 1.287     |

Std Error uses a pooled estimate of error variance

**Means Comparisons**

**Comparisons with a control using Dunnett's Method**



**Oneway Analysis of N-Methylantranilic acid By Label**

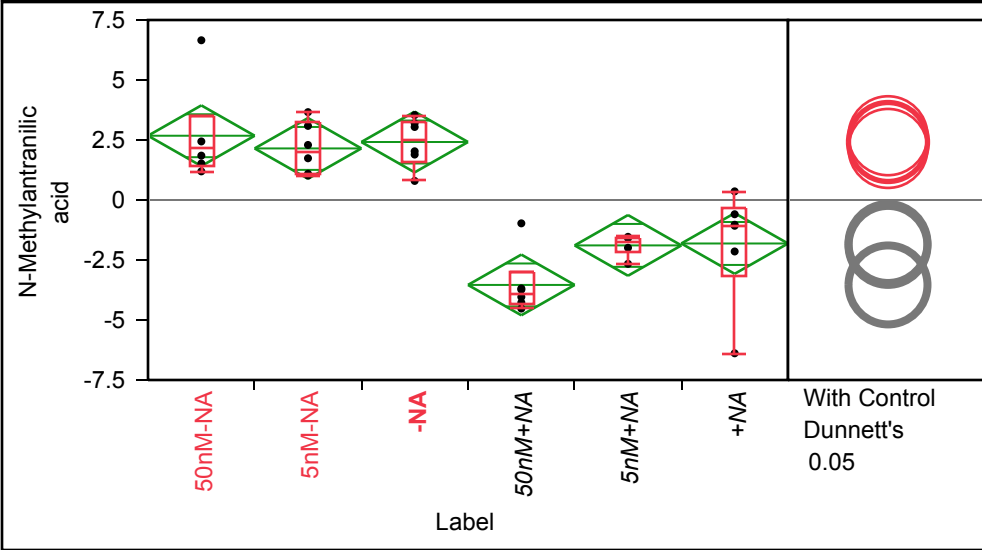

**Quantiles**

| Level   | Minimum  | 10%      | 25%      | Median   | 75%      | 90%      | Maximum  |
|---------|----------|----------|----------|----------|----------|----------|----------|
| 50nM-NA | 1.193095 | 1.193095 | 1.439418 | 2.128231 | 3.493636 | 6.655462 | 6.655462 |
| 5nM-NA  | 1.021455 | 1.021455 | 1.074028 | 2.015678 | 3.231063 | 3.660355 | 3.660355 |
| -NA     | 0.794815 | 0.794815 | 1.618562 | 2.535682 | 3.284603 | 3.53883  | 3.53883  |
| 50nM+NA | -4.52343 | -4.52343 | -4.33593 | -3.88959 | -3.00744 | -0.97293 | -0.97293 |
| 5nM+NA  | -2.66015 | -2.66015 | -2.18556 | -1.79009 | -1.54496 | -1.535   | -1.535   |
| +NA     | -6.38735 | -6.38735 | -3.20529 | -1.0524  | -0.35566 | 0.359379 | 0.359379 |

**Oneway Anova**

**Summary of Fit**

|                            |          |
|----------------------------|----------|
| Rsquare                    | 0.762944 |
| Adj Rsquare                | 0.723434 |
| Root Mean Square Error     | 1.516607 |
| Mean of Response           | -1.11e-8 |
| Observations (or Sum Wgts) | 36       |

**Analysis of Variance**

| Source   | DF | Sum of Squares | Mean Square | F Ratio | Prob > F |
|----------|----|----------------|-------------|---------|----------|
| Label    | 5  | 222.07946      | 44.4159     | 19.3105 | <.0001 * |
| Error    | 30 | 69.00288       | 2.3001      |         |          |
| C. Total | 35 | 291.08234      |             |         |          |

**Means for Oneway Anova**

| Level   | Number | Mean    | Std Error | Lower 95% | Upper 95% |
|---------|--------|---------|-----------|-----------|-----------|
| 50nM-NA | 6      | 2.6777  | 0.61915   | 1.413     | 3.942     |
| 5nM-NA  | 6      | 2.1488  | 0.61915   | 0.884     | 3.413     |
| -NA     | 6      | 2.4163  | 0.61915   | 1.152     | 3.681     |
| 50nM+NA | 6      | -3.5391 | 0.61915   | -4.804    | -2.275    |
| 5nM+NA  | 6      | -1.8918 | 0.61915   | -3.156    | -0.627    |
| +NA     | 6      | -1.8119 | 0.61915   | -3.076    | -0.547    |

Std Error uses a pooled estimate of error variance

**Means Comparisons**

**Comparisons with a control using Dunnett's Method**

**Oneway Analysis of O-acetyl-L-serine By Label**

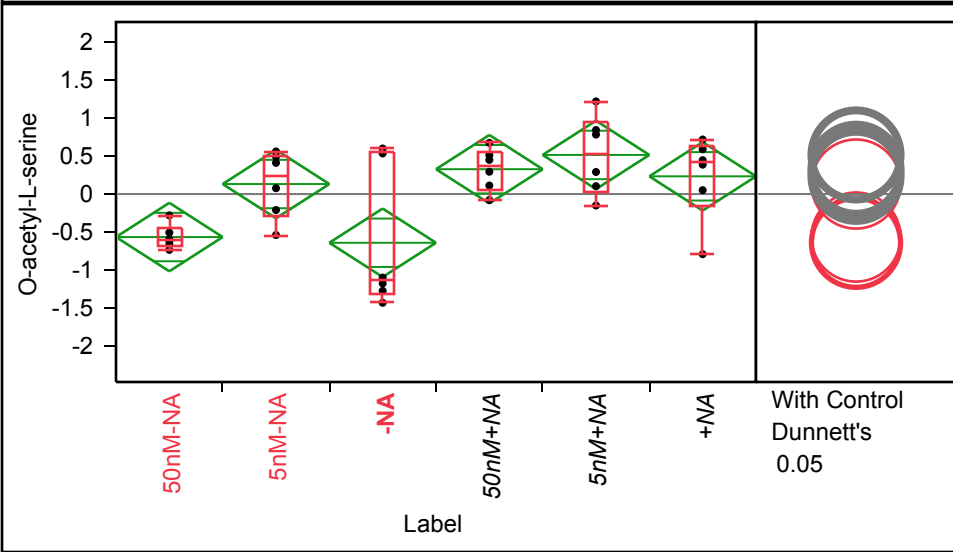

**Quantiles**

| Level   | Minimum  | 10%      | 25%      | Median   | 75%      | 90%      | Maximum  |
|---------|----------|----------|----------|----------|----------|----------|----------|
| 50nM-NA | -0.7377  | -0.7377  | -0.68396 | -0.6069  | -0.45232 | -0.28201 | -0.28201 |
| 5nM-NA  | -0.54152 | -0.54152 | -0.29377 | 0.244636 | 0.511512 | 0.562855 | 0.562855 |
| -NA     | -1.43633 | -1.43633 | -1.31843 | -1.14234 | 0.553022 | 0.601515 | 0.601515 |
| 50nM+NA | -0.07865 | -0.07865 | 0.064724 | 0.373203 | 0.554132 | 0.676668 | 0.676668 |
| 5nM+NA  | -0.15083 | -0.15083 | 0.040264 | 0.539043 | 0.940393 | 1.224106 | 1.224106 |
| +NA     | -0.79465 | -0.79465 | -0.16007 | 0.41796  | 0.623979 | 0.720782 | 0.720782 |

**Oneway Anova**

**Summary of Fit**

|                            |          |
|----------------------------|----------|
| Rsquare                    | 0.445871 |
| Adj Rsquare                | 0.353516 |
| Root Mean Square Error     | 0.542565 |
| Mean of Response           | 8.33e-10 |
| Observations (or Sum Wgts) | 36       |

**Analysis of Variance**

| Source   | DF | Sum of Squares | Mean Square | F Ratio | Prob > F |
|----------|----|----------------|-------------|---------|----------|
| Label    | 5  | 7.105952       | 1.42119     | 4.8278  | 0.0023 * |
| Error    | 30 | 8.831301       | 0.29438     |         |          |
| C. Total | 35 | 15.937253      |             |         |          |

**Means for Oneway Anova**

| Level   | Number | Mean     | Std Error | Lower 95% | Upper 95% |
|---------|--------|----------|-----------|-----------|-----------|
| 50nM-NA | 6      | -0.56811 | 0.22150   | -1.020    | -0.1157   |
| 5nM-NA  | 6      | 0.13230  | 0.22150   | -0.320    | 0.5847    |
| -NA     | 6      | -0.64363 | 0.22150   | -1.096    | -0.1913   |
| 50nM+NA | 6      | 0.32837  | 0.22150   | -0.124    | 0.7807    |
| 5nM+NA  | 6      | 0.51686  | 0.22150   | 0.064     | 0.9692    |
| +NA     | 6      | 0.23420  | 0.22150   | -0.218    | 0.6866    |

Std Error uses a pooled estimate of error variance

**Means Comparisons**

**Comparisons with a control using Dunnnett's Method**

**Oneway Analysis of octulose-monophosphate By Label**

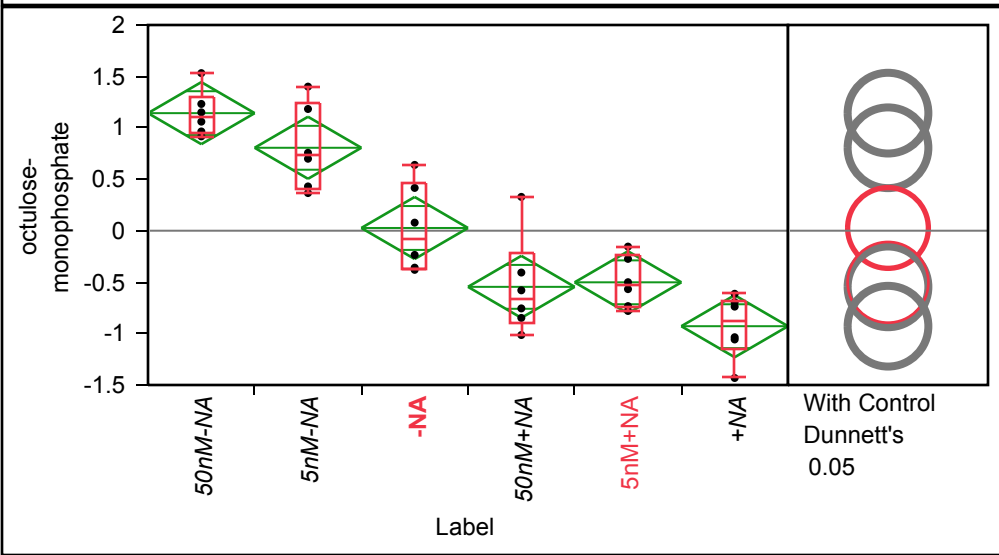

**Quantiles**

| Level   | Minimum  | 10%      | 25%      | Median   | 75%      | 90%      | Maximum  |
|---------|----------|----------|----------|----------|----------|----------|----------|
| 50nM-NA | 0.91743  | 0.91743  | 0.952972 | 1.105549 | 1.307367 | 1.532007 | 1.532007 |
| 5nM-NA  | 0.3661   | 0.3661   | 0.414345 | 0.728616 | 1.237739 | 1.400774 | 1.400774 |
| -NA     | -0.38033 | -0.38033 | -0.36449 | -0.0785  | 0.471987 | 0.63977  | 0.63977  |
| 50nM+NA | -1.01401 | -1.01401 | -0.88949 | -0.66745 | -0.22279 | 0.328796 | 0.328796 |
| 5nM+NA  | -0.77997 | -0.77997 | -0.7449  | -0.53426 | -0.24392 | -0.15452 | -0.15452 |
| +NA     | -1.4318  | -1.4318  | -1.15093 | -0.88675 | -0.6742  | -0.61326 | -0.61326 |

**Oneway Anova**

**Summary of Fit**

|                            |          |
|----------------------------|----------|
| Rsquare                    | 0.837345 |
| Adj Rsquare                | 0.810236 |
| Root Mean Square Error     | 0.361766 |
| Mean of Response           | 2.78e-10 |
| Observations (or Sum Wgts) | 36       |

**Analysis of Variance**

| Source   | DF | Sum of Squares | Mean Square | F Ratio | Prob > F |
|----------|----|----------------|-------------|---------|----------|
| Label    | 5  | 20.212285      | 4.04246     | 30.8879 | <.0001 * |
| Error    | 30 | 3.926247       | 0.13087     |         |          |
| C. Total | 35 | 24.138532      |             |         |          |

**Means for Oneway Anova**

| Level   | Number | Mean    | Std Error | Lower 95% | Upper 95% |
|---------|--------|---------|-----------|-----------|-----------|
| 50nM-NA | 6      | 1.1430  | 0.14769   | 0.841     | 1.445     |
| 5nM-NA  | 6      | 0.8063  | 0.14769   | 0.505     | 1.108     |
| -NA     | 6      | 0.0265  | 0.14769   | -0.275    | 0.328     |
| 50nM+NA | 6      | -0.5458 | 0.14769   | -0.847    | -0.244    |
| 5nM+NA  | 6      | -0.5017 | 0.14769   | -0.803    | -0.200    |
| +NA     | 6      | -0.9284 | 0.14769   | -1.230    | -0.627    |

Std Error uses a pooled estimate of error variance

**Means Comparisons**

**Comparisons with a control using Dunnnett's Method**

**Oneway Analysis of ornithine By Label**

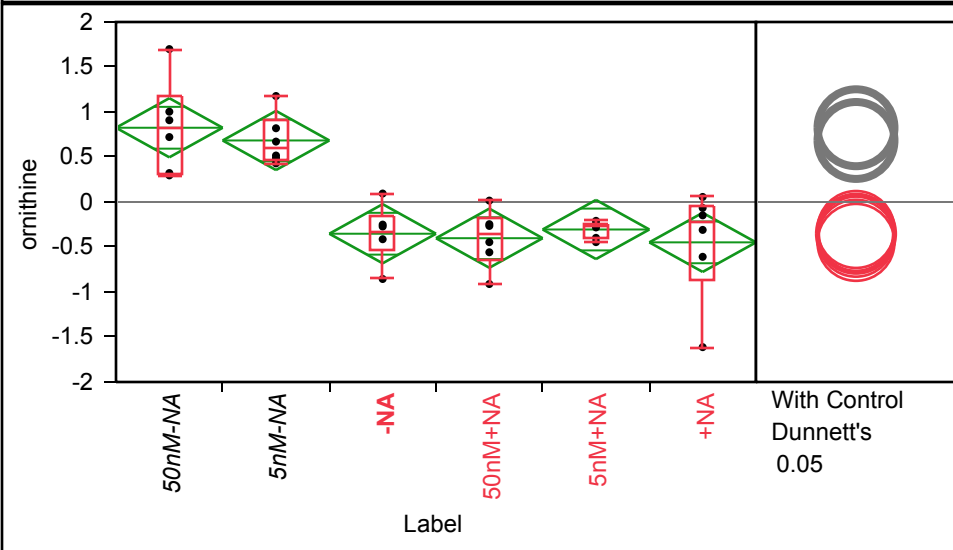

**Quantiles**

| Level   | Minimum  | 10%      | 25%      | Median   | 75%      | 90%      | Maximum  |
|---------|----------|----------|----------|----------|----------|----------|----------|
| 50nM-NA | 0.295827 | 0.295827 | 0.315055 | 0.815098 | 1.177161 | 1.698805 | 1.698805 |
| 5nM-NA  | 0.429514 | 0.429514 | 0.47362  | 0.593711 | 0.90894  | 1.177517 | 1.177517 |
| -NA     | -0.85555 | -0.85555 | -0.52612 | -0.34306 | -0.16496 | 0.093936 | 0.093936 |
| 50nM+NA | -0.91137 | -0.91137 | -0.64686 | -0.35607 | -0.18107 | 0.015322 | 0.015322 |
| 5nM+NA  | -0.44581 | -0.44581 | -0.41026 | -0.26769 | -0.23512 | -0.20948 | -0.20948 |
| +NA     | -1.61274 | -1.61274 | -0.85997 | -0.22927 | -0.03551 | 0.056038 | 0.056038 |

**Oneway Anova**

**Summary of Fit**

|                            |          |
|----------------------------|----------|
| Rsquare                    | 0.690171 |
| Adj Rsquare                | 0.638533 |
| Root Mean Square Error     | 0.393929 |
| Mean of Response           | 4.93e-17 |
| Observations (or Sum Wgts) | 36       |

**Analysis of Variance**

| Source   | DF | Sum of Squares | Mean Square | F Ratio | Prob > F |
|----------|----|----------------|-------------|---------|----------|
| Label    | 5  | 10.370326      | 2.07407     | 13.3655 | <.0001 * |
| Error    | 30 | 4.655406       | 0.15518     |         |          |
| C. Total | 35 | 15.025732      |             |         |          |

**Means for Oneway Anova**

| Level   | Number | Mean     | Std Error | Lower 95% | Upper 95% |
|---------|--------|----------|-----------|-----------|-----------|
| 50nM-NA | 6      | 0.82493  | 0.16082   | 0.4965    | 1.153     |
| 5nM-NA  | 6      | 0.68370  | 0.16082   | 0.3553    | 1.012     |
| -NA     | 6      | -0.35255 | 0.16082   | -0.6810   | -0.024    |
| 50nM+NA | 6      | -0.40223 | 0.16082   | -0.7307   | -0.074    |
| 5nM+NA  | 6      | -0.30546 | 0.16082   | -0.6339   | 0.023     |
| +NA     | 6      | -0.44838 | 0.16082   | -0.7768   | -0.120    |

Std Error uses a pooled estimate of error variance

**Means Comparisons**

**Comparisons with a control using Dunnett's Method**

**Oneway Analysis of orotate By Label**

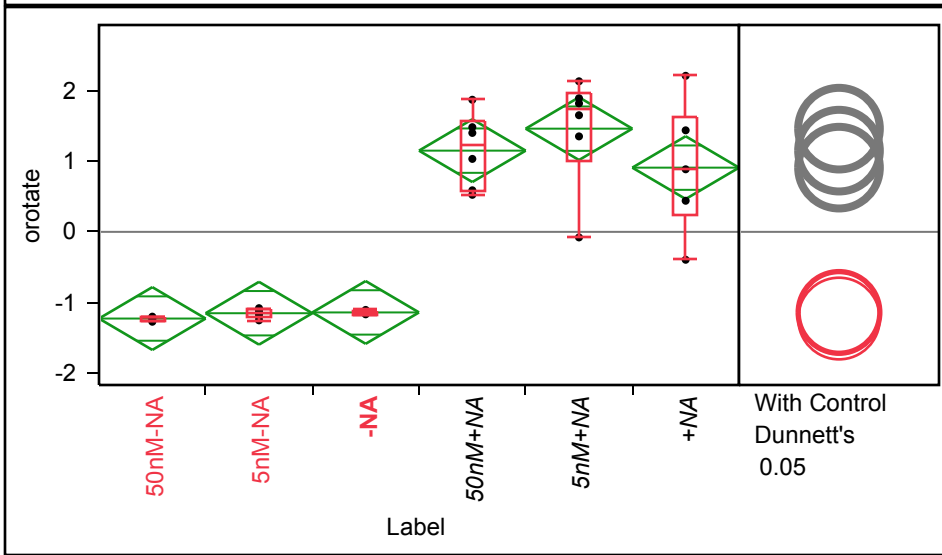

**Quantiles**

| Level   | Minimum  | 10%      | 25%      | Median   | 75%      | 90%      | Maximum  |
|---------|----------|----------|----------|----------|----------|----------|----------|
| 50nM-NA | -1.26978 | -1.26978 | -1.24684 | -1.21455 | -1.20783 | -1.19795 | -1.19795 |
| 5nM-NA  | -1.24993 | -1.24993 | -1.21223 | -1.1389  | -1.08783 | -1.07825 | -1.07825 |
| -NA     | -1.17881 | -1.17881 | -1.16848 | -1.13517 | -1.1097  | -1.10293 | -1.10293 |
| 50nM+NA | 0.523398 | 0.523398 | 0.571153 | 1.214077 | 1.575662 | 1.866089 | 1.866089 |
| 5nM+NA  | -0.07859 | -0.07859 | 0.991783 | 1.731076 | 1.947724 | 2.126855 | 2.126855 |
| +NA     | -0.39413 | -0.39413 | 0.230953 | 0.879247 | 1.626829 | 2.20434  | 2.20434  |

**Oneway Anova**

**Summary of Fit**

|                            |          |
|----------------------------|----------|
| Rsquare                    | 0.855703 |
| Adj Rsquare                | 0.831654 |
| Root Mean Square Error     | 0.531635 |
| Mean of Response           | -7.4e-17 |
| Observations (or Sum Wgts) | 36       |

**Analysis of Variance**

| Source   | DF | Sum of Squares | Mean Square | F Ratio | Prob > F |
|----------|----|----------------|-------------|---------|----------|
| Label    | 5  | 50.282324      | 10.0565     | 35.5810 | <.0001 * |
| Error    | 30 | 8.479082       | 0.2826      |         |          |
| C. Total | 35 | 58.761406      |             |         |          |

**Means for Oneway Anova**

| Level   | Number | Mean    | Std Error | Lower 95% | Upper 95% |
|---------|--------|---------|-----------|-----------|-----------|
| 50nM-NA | 6      | -1.2245 | 0.21704   | -1.668    | -0.781    |
| 5nM-NA  | 6      | -1.1494 | 0.21704   | -1.593    | -0.706    |
| -NA     | 6      | -1.1382 | 0.21704   | -1.581    | -0.695    |
| 50nM+NA | 6      | 1.1473  | 0.21704   | 0.704     | 1.591     |
| 5nM+NA  | 6      | 1.4578  | 0.21704   | 1.015     | 1.901     |
| +NA     | 6      | 0.9071  | 0.21704   | 0.464     | 1.350     |

Std Error uses a pooled estimate of error variance

**Means Comparisons**

**Comparisons with a control using Dunnett's Method**

**Oneway Analysis of Orotidine By Label**

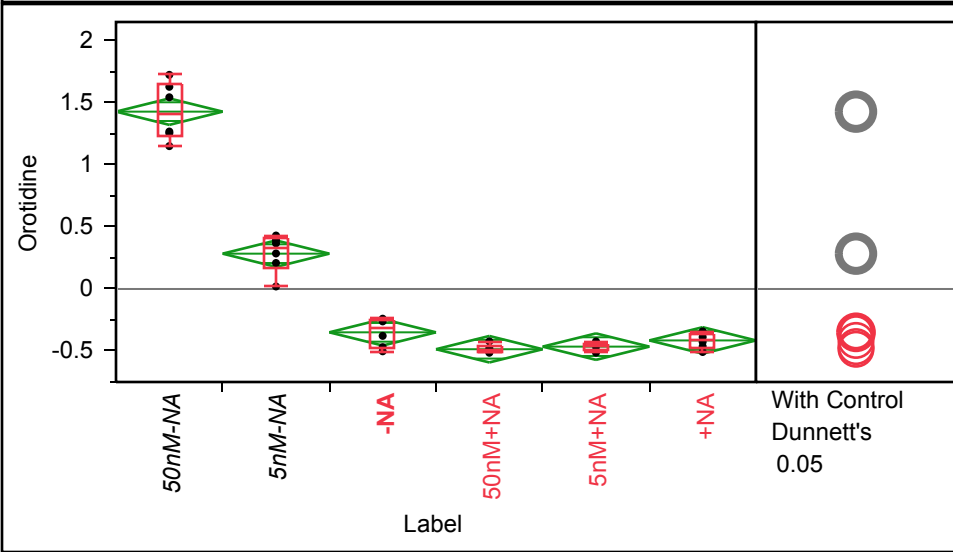

**Quantiles**

| Level   | Minimum  | 10%      | 25%      | Median   | 75%      | 90%      | Maximum  |
|---------|----------|----------|----------|----------|----------|----------|----------|
| 50nM-NA | 1.151948 | 1.151948 | 1.230013 | 1.407545 | 1.654364 | 1.726587 | 1.726587 |
| 5nM-NA  | 0.020209 | 0.020209 | 0.162174 | 0.327239 | 0.403081 | 0.430836 | 0.430836 |
| -NA     | -0.50238 | -0.50238 | -0.47745 | -0.31964 | -0.24469 | -0.23968 | -0.23968 |
| 50nM+NA | -0.51416 | -0.51416 | -0.5075  | -0.4975  | -0.46382 | -0.42229 | -0.42229 |
| 5nM+NA  | -0.51315 | -0.51315 | -0.49972 | -0.45583 | -0.43998 | -0.42297 | -0.42297 |
| +NA     | -0.50811 | -0.50811 | -0.47438 | -0.40778 | -0.35555 | -0.34199 | -0.34199 |

**Oneway Anova**

**Summary of Fit**

|                            |          |
|----------------------------|----------|
| Rsquare                    | 0.972298 |
| Adj Rsquare                | 0.967682 |
| Root Mean Square Error     | 0.127929 |
| Mean of Response           | -1.11e-9 |
| Observations (or Sum Wgts) | 36       |

**Analysis of Variance**

| Source   | DF | Sum of Squares | Mean Square | F Ratio  | Prob > F |
|----------|----|----------------|-------------|----------|----------|
| Label    | 5  | 17.232900      | 3.44658     | 210.5946 | <.0001 * |
| Error    | 30 | 0.490978       | 0.01637     |          |          |
| C. Total | 35 | 17.723878      |             |          |          |

**Means for Oneway Anova**

| Level   | Number | Mean    | Std Error | Lower 95% | Upper 95% |
|---------|--------|---------|-----------|-----------|-----------|
| 50nM-NA | 6      | 1.4300  | 0.05223   | 1.323     | 1.537     |
| 5nM-NA  | 6      | 0.2848  | 0.05223   | 0.178     | 0.391     |
| -NA     | 6      | -0.3495 | 0.05223   | -0.456    | -0.243    |
| 50nM+NA | 6      | -0.4857 | 0.05223   | -0.592    | -0.379    |
| 5nM+NA  | 6      | -0.4648 | 0.05223   | -0.571    | -0.358    |
| +NA     | 6      | -0.4148 | 0.05223   | -0.521    | -0.308    |

Std Error uses a pooled estimate of error variance

**Means Comparisons**

**Comparisons with a control using Dunnett's Method**

**Oneway Analysis of Palmitic acid By Label**

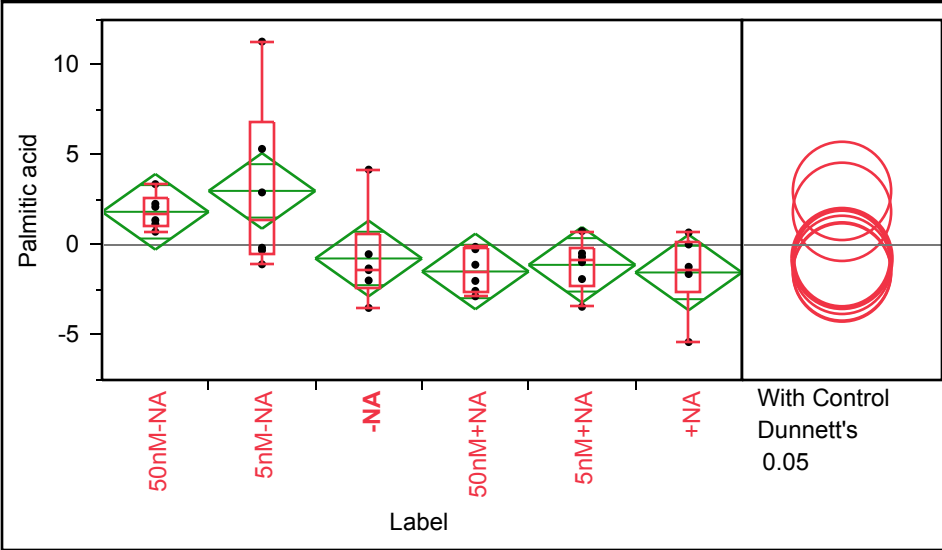

**Quantiles**

| Level   | Minimum  | 10%      | 25%      | Median   | 75%      | 90%      | Maximum  |
|---------|----------|----------|----------|----------|----------|----------|----------|
| 50nM-NA | 0.736564 | 0.736564 | 1.053695 | 1.748289 | 2.561116 | 3.380835 | 3.380835 |
| 5nM-NA  | -1.07402 | -1.07402 | -0.49108 | 1.38432  | 6.828279 | 11.29858 | 11.29858 |
| -NA     | -3.49675 | -3.49675 | -2.35222 | -1.34916 | 0.663041 | 4.185627 | 4.185627 |
| 50nM+NA | -2.8505  | -2.8505  | -2.62467 | -1.54642 | -0.20013 | -0.10223 | -0.10223 |
| 5nM+NA  | -3.43247 | -3.43247 | -2.27808 | -0.80387 | -0.15137 | 0.772145 | 0.772145 |
| +NA     | -5.39211 | -5.39211 | -2.59525 | -1.41252 | 0.195825 | 0.694085 | 0.694085 |

**Oneway Anova**

**Summary of Fit**

|                            |          |
|----------------------------|----------|
| Rsquare                    | 0.371363 |
| Adj Rsquare                | 0.26659  |
| Root Mean Square Error     | 2.516463 |
| Mean of Response           | -5.6e-10 |
| Observations (or Sum Wgts) | 36       |

**Analysis of Variance**

| Source   | DF | Sum of Squares | Mean Square | F Ratio | Prob > F |
|----------|----|----------------|-------------|---------|----------|
| Label    | 5  | 112.22810      | 22.4456     | 3.5445  | 0.0123 * |
| Error    | 30 | 189.97764      | 6.3326      |         |          |
| C. Total | 35 | 302.20574      |             |         |          |

**Means for Oneway Anova**

| Level   | Number | Mean    | Std Error | Lower 95% | Upper 95% |
|---------|--------|---------|-----------|-----------|-----------|
| 50nM-NA | 6      | 1.8435  | 1.0273    | -0.255    | 3.9417    |
| 5nM-NA  | 6      | 3.0058  | 1.0273    | 0.908     | 5.1039    |
| -NA     | 6      | -0.7486 | 1.0273    | -2.847    | 1.3496    |
| 50nM+NA | 6      | -1.4713 | 1.0273    | -3.569    | 0.6268    |
| 5nM+NA  | 6      | -1.1034 | 1.0273    | -3.202    | 0.9947    |
| +NA     | 6      | -1.5260 | 1.0273    | -3.624    | 0.5721    |

Std Error uses a pooled estimate of error variance

**Means Comparisons**

**Comparisons with a control using Dunnett's Method**

**Oneway Analysis of pantothenate By Label**

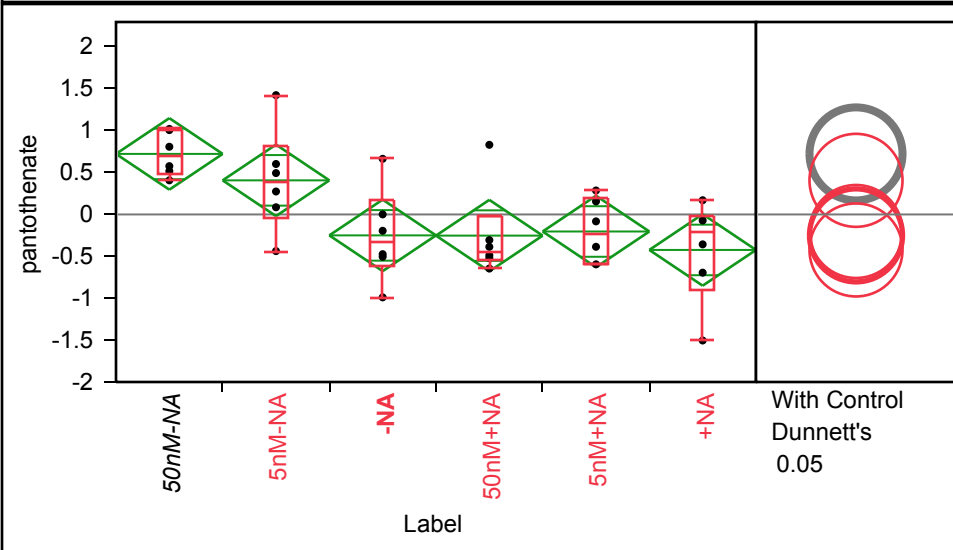

**Quantiles**

| Level   | Minimum  | 10%      | 25%      | Median   | 75%      | 90%      | Maximum  |
|---------|----------|----------|----------|----------|----------|----------|----------|
| 50nM-NA | 0.407329 | 0.407329 | 0.489149 | 0.69236  | 1.010274 | 1.020622 | 1.020622 |
| 5nM-NA  | -0.43735 | -0.43735 | -0.04508 | 0.383871 | 0.807595 | 1.423901 | 1.423901 |
| -NA     | -0.98979 | -0.98979 | -0.62616 | -0.33457 | 0.166501 | 0.664041 | 0.664041 |
| 50nM+NA | -0.64544 | -0.64544 | -0.5519  | -0.43749 | -0.0218  | 0.831125 | 0.831125 |
| 5nM+NA  | -0.59809 | -0.59809 | -0.5961  | -0.23437 | 0.188178 | 0.286109 | 0.286109 |
| +NA     | -1.50457 | -1.50457 | -0.89739 | -0.21998 | -0.01175 | 0.169584 | 0.169584 |

**Oneway Anova**

**Summary of Fit**

|                            |          |
|----------------------------|----------|
| Rsquare                    | 0.44143  |
| Adj Rsquare                | 0.348335 |
| Root Mean Square Error     | 0.51181  |
| Mean of Response           | -4.9e-17 |
| Observations (or Sum Wgts) | 36       |

**Analysis of Variance**

| Source   | DF | Sum of Squares | Mean Square | F Ratio | Prob > F |
|----------|----|----------------|-------------|---------|----------|
| Label    | 5  | 6.210452       | 1.24209     | 4.7417  | 0.0026 * |
| Error    | 30 | 7.858490       | 0.26195     |         |          |
| C. Total | 35 | 14.068942      |             |         |          |

**Means for Oneway Anova**

| Level   | Number | Mean     | Std Error | Lower 95% | Upper 95% |
|---------|--------|----------|-----------|-----------|-----------|
| 50nM-NA | 6      | 0.72265  | 0.20895   | 0.2959    | 1.1494    |
| 5nM-NA  | 6      | 0.40702  | 0.20895   | -0.0197   | 0.8337    |
| -NA     | 6      | -0.24986 | 0.20895   | -0.6766   | 0.1769    |
| 50nM+NA | 6      | -0.25269 | 0.20895   | -0.6794   | 0.1740    |
| 5nM+NA  | 6      | -0.20343 | 0.20895   | -0.6302   | 0.2233    |
| +NA     | 6      | -0.42369 | 0.20895   | -0.8504   | 0.0030    |

Std Error uses a pooled estimate of error variance

**Means Comparisons**

**Comparisons with a control using Dunnett's Method**



**Oneway Analysis of PC(15:0) By Label**

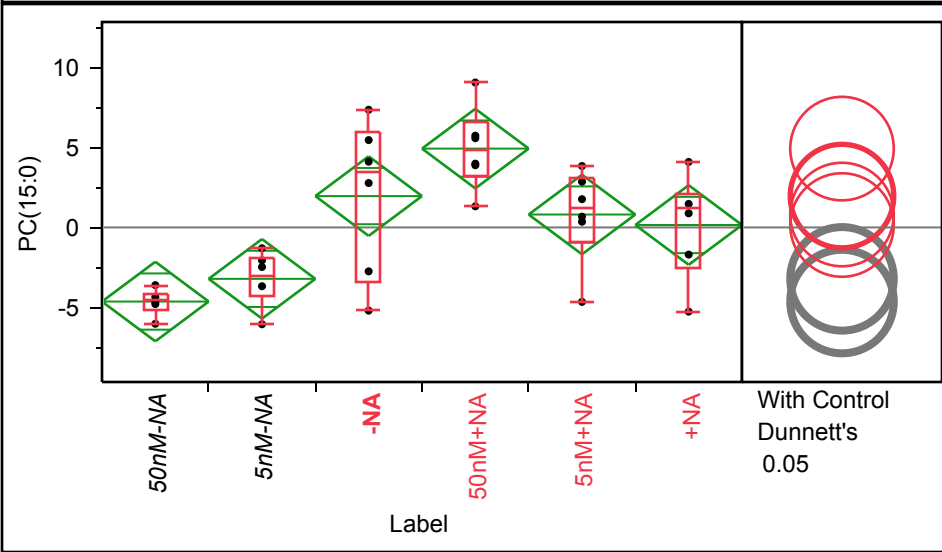

**Quantiles**

| Level   | Minimum  | 10%      | 25%      | Median   | 75%      | 90%      | Maximum  |
|---------|----------|----------|----------|----------|----------|----------|----------|
| 50nM-NA | -6.0111  | -6.0111  | -5.0904  | -4.50541 | -4.15608 | -3.60084 | -3.60084 |
| 5nM-NA  | -6.04163 | -6.04163 | -4.29945 | -3.06814 | -1.86577 | -1.2991  | -1.2991  |
| -NA     | -5.19024 | -5.19024 | -3.35263 | 3.437032 | 5.922598 | 7.342681 | 7.342681 |
| 50nM+NA | 1.318832 | 1.318832 | 3.23996  | 4.773788 | 6.555685 | 9.042641 | 9.042641 |
| 5nM+NA  | -4.64536 | -4.64536 | -0.89418 | 1.217433 | 3.099722 | 3.830878 | 3.830878 |
| +NA     | -5.25276 | -5.25276 | -2.5838  | 1.152753 | 2.122812 | 4.086709 | 4.086709 |

**Oneway Anova**

**Summary of Fit**

|                            |          |
|----------------------------|----------|
| Rsquare                    | 0.57664  |
| Adj Rsquare                | 0.50608  |
| Root Mean Square Error     | 2.977539 |
| Mean of Response           | 2.778e-9 |
| Observations (or Sum Wgts) | 36       |

**Analysis of Variance**

| Source   | DF | Sum of Squares | Mean Square | F Ratio | Prob > F |
|----------|----|----------------|-------------|---------|----------|
| Label    | 5  | 362.26844      | 72.4537     | 8.1723  | <.0001 * |
| Error    | 30 | 265.97220      | 8.8657      |         |          |
| C. Total | 35 | 628.24065      |             |         |          |

**Means for Oneway Anova**

| Level   | Number | Mean    | Std Error | Lower 95% | Upper 95% |
|---------|--------|---------|-----------|-----------|-----------|
| 50nM-NA | 6      | -4.6246 | 1.2156    | -7.107    | -2.142    |
| 5nM-NA  | 6      | -3.2084 | 1.2156    | -5.691    | -0.726    |
| -NA     | 6      | 1.9559  | 1.2156    | -0.527    | 4.438     |
| 50nM+NA | 6      | 4.9193  | 1.2156    | 2.437     | 7.402     |
| 5nM+NA  | 6      | 0.8054  | 1.2156    | -1.677    | 3.288     |
| +NA     | 6      | 0.1522  | 1.2156    | -2.330    | 2.635     |

Std Error uses a pooled estimate of error variance

**Means Comparisons**

**Comparisons with a control using Dunnett's Method**

**Oneway Analysis of p-Coumaric acid By Label**

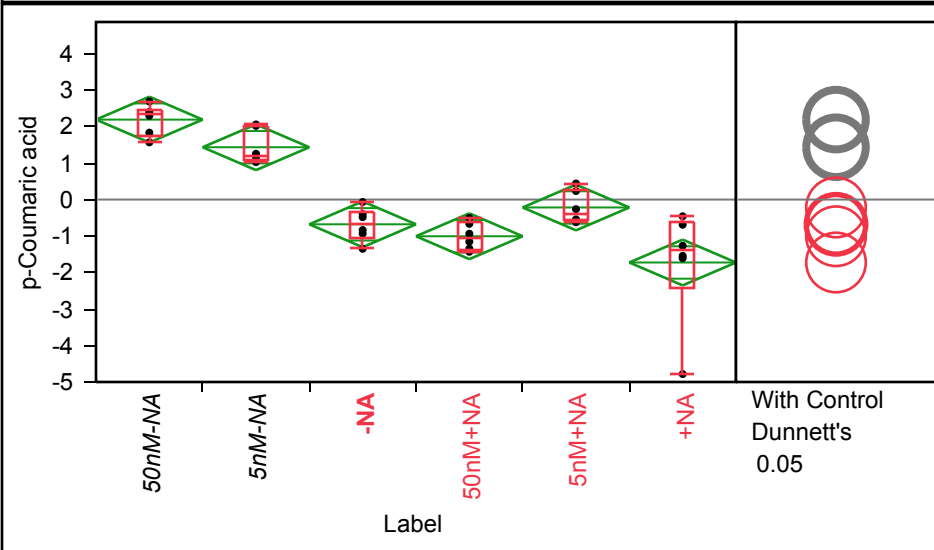

**Quantiles**

| Level   | Minimum  | 10%      | 25%      | Median   | 75%      | 90%      | Maximum  |
|---------|----------|----------|----------|----------|----------|----------|----------|
| 50nM-NA | 1.568616 | 1.568616 | 1.767637 | 2.326255 | 2.474348 | 2.68842  | 2.68842  |
| 5nM-NA  | 1.026103 | 1.026103 | 1.059658 | 1.215462 | 2.028909 | 2.057468 | 2.057468 |
| -NA     | -1.34831 | -1.34831 | -1.0382  | -0.65915 | -0.31606 | -0.0675  | -0.0675  |
| 50nM+NA | -1.4305  | -1.4305  | -1.36692 | -1.04454 | -0.6246  | -0.5046  | -0.5046  |
| 5nM+NA  | -0.6227  | -0.6227  | -0.56404 | -0.40327 | 0.285436 | 0.439462 | 0.439462 |
| +NA     | -4.78182 | -4.78182 | -2.40064 | -1.40548 | -0.63179 | -0.45993 | -0.45993 |

**Oneway Anova**

**Summary of Fit**

|                            |          |
|----------------------------|----------|
| Rsquare                    | 0.800414 |
| Adj Rsquare                | 0.76715  |
| Root Mean Square Error     | 0.752371 |
| Mean of Response           | 2.78e-10 |
| Observations (or Sum Wgts) | 36       |

**Analysis of Variance**

| Source   | DF | Sum of Squares | Mean Square | F Ratio | Prob > F |
|----------|----|----------------|-------------|---------|----------|
| Label    | 5  | 68.103497      | 13.6207     | 24.0622 | <.0001 * |
| Error    | 30 | 16.981857      | 0.5661      |         |          |
| C. Total | 35 | 85.085355      |             |         |          |

**Means for Oneway Anova**

| Level   | Number | Mean    | Std Error | Lower 95% | Upper 95% |
|---------|--------|---------|-----------|-----------|-----------|
| 50nM-NA | 6      | 2.1911  | 0.30715   | 1.564     | 2.818     |
| 5nM-NA  | 6      | 1.4341  | 0.30715   | 0.807     | 2.061     |
| -NA     | 6      | -0.6780 | 0.30715   | -1.305    | -0.051    |
| 50nM+NA | 6      | -1.0058 | 0.30715   | -1.633    | -0.378    |
| 5nM+NA  | 6      | -0.2167 | 0.30715   | -0.844    | 0.411     |
| +NA     | 6      | -1.7248 | 0.30715   | -2.352    | -1.097    |

Std Error uses a pooled estimate of error variance

**Means Comparisons**

**Comparisons with a control using Dunnett's Method**

**Oneway Analysis of Pentadecanal By Label**

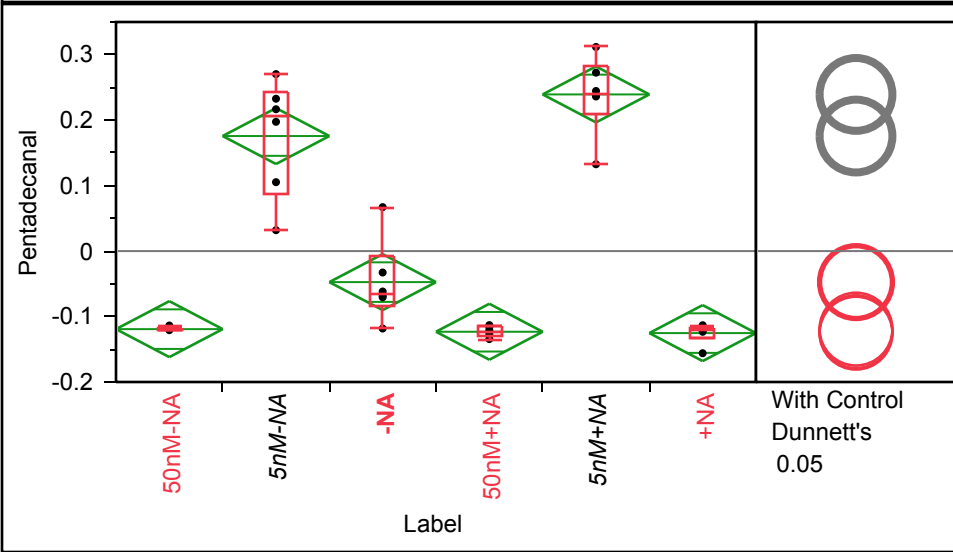

**Quantiles**

| Level   | Minimum  | 10%      | 25%      | Median   | 75%      | 90%      | Maximum  |
|---------|----------|----------|----------|----------|----------|----------|----------|
| 50nM-NA | -0.12177 | -0.12177 | -0.12141 | -0.12011 | -0.11722 | -0.11374 | -0.11374 |
| 5nM-NA  | 0.031972 | 0.031972 | 0.086976 | 0.20711  | 0.242158 | 0.270371 | 0.270371 |
| -NA     | -0.1183  | -0.1183  | -0.08247 | -0.06497 | -0.00777 | 0.067149 | 0.067149 |
| 50nM+NA | -0.13441 | -0.13441 | -0.12962 | -0.12384 | -0.11535 | -0.11311 | -0.11311 |
| 5nM+NA  | 0.132684 | 0.132684 | 0.210313 | 0.241399 | 0.282413 | 0.311855 | 0.311855 |
| +NA     | -0.15603 | -0.15603 | -0.13148 | -0.12012 | -0.11743 | -0.11328 | -0.11328 |

**Oneway Anova**

**Summary of Fit**

|                            |          |
|----------------------------|----------|
| Rsquare                    | 0.911598 |
| Adj Rsquare                | 0.896865 |
| Root Mean Square Error     | 0.051269 |
| Mean of Response           | 8.33e-10 |
| Observations (or Sum Wgts) | 36       |

**Analysis of Variance**

| Source   | DF | Sum of Squares | Mean Square | F Ratio | Prob > F |
|----------|----|----------------|-------------|---------|----------|
| Label    | 5  | 0.81315880     | 0.162632    | 61.8721 | <.0001 * |
| Error    | 30 | 0.07885544     | 0.002629    |         |          |
| C. Total | 35 | 0.89201424     |             |         |          |

**Means for Oneway Anova**

| Level   | Number | Mean     | Std Error | Lower 95% | Upper 95% |
|---------|--------|----------|-----------|-----------|-----------|
| 50nM-NA | 6      | -0.11923 | 0.02093   | -0.1620   | -0.0765   |
| 5nM-NA  | 6      | 0.17577  | 0.02093   | 0.1330    | 0.2185    |
| -NA     | 6      | -0.04740 | 0.02093   | -0.0901   | -0.0046   |
| 50nM+NA | 6      | -0.12322 | 0.02093   | -0.1660   | -0.0805   |
| 5nM+NA  | 6      | 0.23935  | 0.02093   | 0.1966    | 0.2821    |
| +NA     | 6      | -0.12528 | 0.02093   | -0.1680   | -0.0825   |

Std Error uses a pooled estimate of error variance

**Means Comparisons**

**Comparisons with a control using Dunnett's Method**

**Oneway Analysis of Phenacylamine By Label**

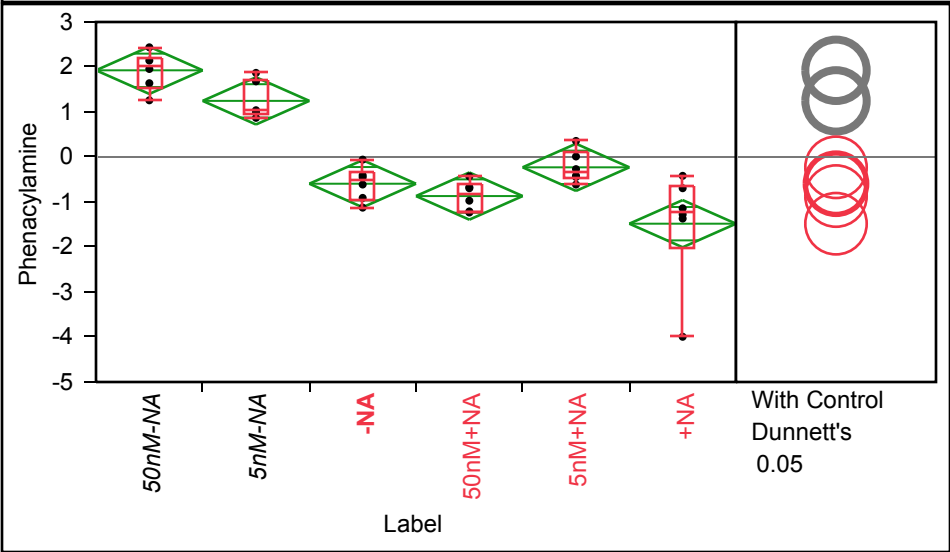

**Quantiles**

| Level   | Minimum  | 10%      | 25%      | Median   | 75%      | 90%      | Maximum  |
|---------|----------|----------|----------|----------|----------|----------|----------|
| 50nM-NA | 1.259613 | 1.259613 | 1.544547 | 2.039386 | 2.216602 | 2.437282 | 2.437282 |
| 5nM-NA  | 0.870145 | 0.870145 | 0.959933 | 1.036145 | 1.728381 | 1.869342 | 1.869342 |
| -NA     | -1.12532 | -1.12532 | -0.96304 | -0.53195 | -0.31932 | -0.05862 | -0.05862 |
| 50nM+NA | -1.23335 | -1.23335 | -1.2152  | -0.83279 | -0.61009 | -0.43065 | -0.43065 |
| 5nM+NA  | -0.61321 | -0.61321 | -0.48669 | -0.34355 | 0.097768 | 0.356673 | 0.356673 |
| +NA     | -3.99524 | -3.99524 | -2.02473 | -1.20853 | -0.62507 | -0.41898 | -0.41898 |

**Oneway Anova**

**Summary of Fit**

|                            |          |
|----------------------------|----------|
| Rsquare                    | 0.813449 |
| Adj Rsquare                | 0.782357 |
| Root Mean Square Error     | 0.628859 |
| Mean of Response           | 8.33e-10 |
| Observations (or Sum Wgts) | 36       |

**Analysis of Variance**

| Source   | DF | Sum of Squares | Mean Square | F Ratio | Prob > F |
|----------|----|----------------|-------------|---------|----------|
| Label    | 5  | 51.732196      | 10.3464     | 26.1628 | <.0001 * |
| Error    | 30 | 11.863918      | 0.3955      |         |          |
| C. Total | 35 | 63.596113      |             |         |          |

**Means for Oneway Anova**

| Level   | Number | Mean    | Std Error | Lower 95% | Upper 95% |
|---------|--------|---------|-----------|-----------|-----------|
| 50nM-NA | 6      | 1.9264  | 0.25673   | 1.402     | 2.451     |
| 5nM-NA  | 6      | 1.2472  | 0.25673   | 0.723     | 1.771     |
| -NA     | 6      | -0.5938 | 0.25673   | -1.118    | -0.070    |
| 50nM+NA | 6      | -0.8681 | 0.25673   | -1.392    | -0.344    |
| 5nM+NA  | 6      | -0.2294 | 0.25673   | -0.754    | 0.295     |
| +NA     | 6      | -1.4822 | 0.25673   | -2.006    | -0.958    |

Std Error uses a pooled estimate of error variance

**Means Comparisons**

**Comparisons with a control using Dunnett's Method**

**Oneway Analysis of phenylalanine By Label**

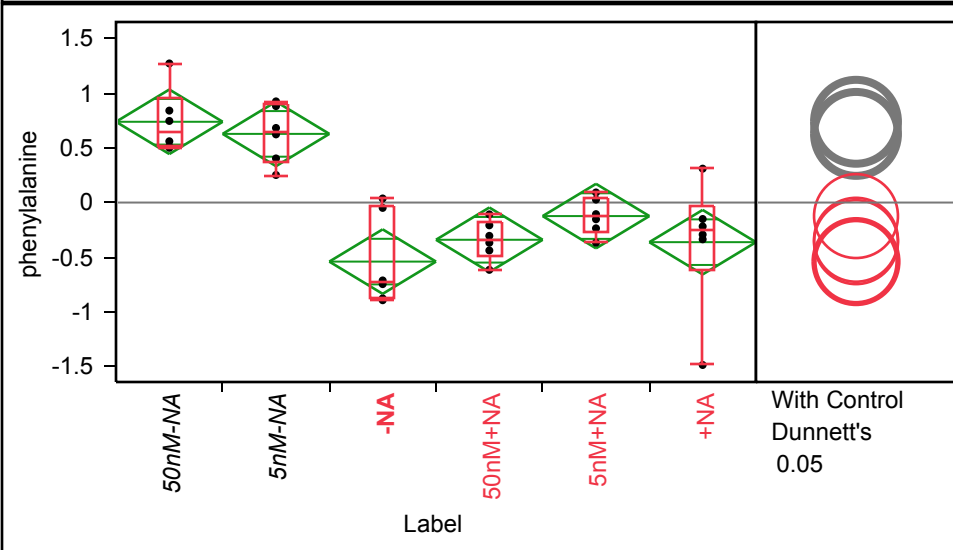

**Quantiles**

| Level   | Minimum  | 10%      | 25%      | Median   | 75%      | 90%      | Maximum  |
|---------|----------|----------|----------|----------|----------|----------|----------|
| 50nM-NA | 0.500378 | 0.500378 | 0.508715 | 0.652833 | 0.947847 | 1.271129 | 1.271129 |
| 5nM-NA  | 0.251728 | 0.251728 | 0.365185 | 0.65224  | 0.892013 | 0.924404 | 0.924404 |
| -NA     | -0.89259 | -0.89259 | -0.88039 | -0.72871 | -0.02738 | 0.037103 | 0.037103 |
| 50nM+NA | -0.61485 | -0.61485 | -0.48216 | -0.33609 | -0.18311 | -0.10805 | -0.10805 |
| 5nM+NA  | -0.36691 | -0.36691 | -0.2684  | -0.12936 | 0.043246 | 0.092094 | 0.092094 |
| +NA     | -1.48454 | -1.48454 | -0.62312 | -0.25547 | -0.0354  | 0.309653 | 0.309653 |

**Oneway Anova**

**Summary of Fit**

|                            |          |
|----------------------------|----------|
| Rsquare                    | 0.704907 |
| Adj Rsquare                | 0.655725 |
| Root Mean Square Error     | 0.353427 |
| Mean of Response           | 2.78e-10 |
| Observations (or Sum Wgts) | 36       |

**Analysis of Variance**

| Source   | DF | Sum of Squares | Mean Square | F Ratio | Prob > F |
|----------|----|----------------|-------------|---------|----------|
| Label    | 5  | 8.951437       | 1.79029     | 14.3326 | <.0001 * |
| Error    | 30 | 3.747316       | 0.12491     |         |          |
| C. Total | 35 | 12.698753      |             |         |          |

**Means for Oneway Anova**

| Level   | Number | Mean     | Std Error | Lower 95% | Upper 95% |
|---------|--------|----------|-----------|-----------|-----------|
| 50nM-NA | 6      | 0.73813  | 0.14429   | 0.4435    | 1.033     |
| 5nM-NA  | 6      | 0.62747  | 0.14429   | 0.3328    | 0.922     |
| -NA     | 6      | -0.53968 | 0.14429   | -0.8344   | -0.245    |
| 50nM+NA | 6      | -0.34019 | 0.14429   | -0.6349   | -0.046    |
| 5nM+NA  | 6      | -0.12369 | 0.14429   | -0.4184   | 0.171     |
| +NA     | 6      | -0.36204 | 0.14429   | -0.6567   | -0.067    |

Std Error uses a pooled estimate of error variance

**Means Comparisons**

**Comparisons with a control using Dunnett's Method**

**Oneway Analysis of Phenyllactic acid By Label**

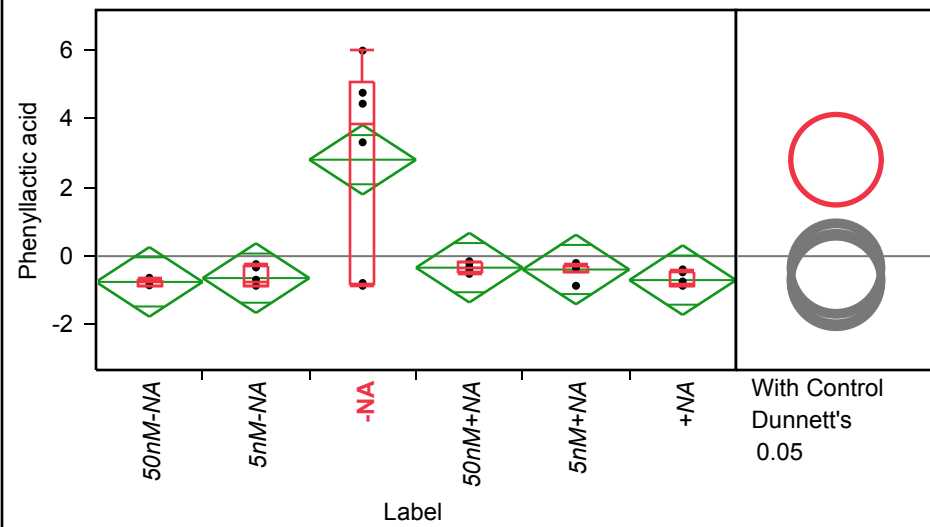

**Quantiles**

| Level   | Minimum  | 10%      | 25%      | Median   | 75%      | 90%      | Maximum  |
|---------|----------|----------|----------|----------|----------|----------|----------|
| 50nM-NA | -0.86261 | -0.86261 | -0.85247 | -0.73173 | -0.67494 | -0.62955 | -0.62955 |
| 5nM-NA  | -0.86262 | -0.86262 | -0.86262 | -0.77422 | -0.30419 | -0.23218 | -0.23218 |
| -NA     | -0.86262 | -0.86262 | -0.80119 | 3.876452 | 5.063591 | 5.983731 | 5.983731 |
| 50nM+NA | -0.51607 | -0.51607 | -0.43693 | -0.36416 | -0.19107 | -0.14746 | -0.14746 |
| 5nM+NA  | -0.86263 | -0.86263 | -0.47141 | -0.31253 | -0.27755 | -0.19951 | -0.19951 |
| +NA     | -0.86263 | -0.86263 | -0.86263 | -0.80039 | -0.44881 | -0.3857  | -0.3857  |

**Oneway Anova**

**Summary of Fit**

|                            |          |
|----------------------------|----------|
| Rsquare                    | 0.565858 |
| Adj Rsquare                | 0.493501 |
| Root Mean Square Error     | 1.214032 |
| Mean of Response           | -2.78e-9 |
| Observations (or Sum Wgts) | 36       |

**Analysis of Variance**

| Source   | DF | Sum of Squares | Mean Square | F Ratio | Prob > F |
|----------|----|----------------|-------------|---------|----------|
| Label    | 5  | 57.63107       | 11.5262     | 7.8204  | <.0001 * |
| Error    | 30 | 44.21620       | 1.4739      |         |          |
| C. Total | 35 | 101.84727      |             |         |          |

**Means for Oneway Anova**

| Level   | Number | Mean    | Std Error | Lower 95% | Upper 95% |
|---------|--------|---------|-----------|-----------|-----------|
| 50nM-NA | 6      | -0.7491 | 0.49563   | -1.761    | 0.2631    |
| 5nM-NA  | 6      | -0.6390 | 0.49563   | -1.651    | 0.3732    |
| -NA     | 6      | 2.8084  | 0.49563   | 1.796     | 3.8206    |
| 50nM+NA | 6      | -0.3347 | 0.49563   | -1.347    | 0.6775    |
| 5nM+NA  | 6      | -0.3886 | 0.49563   | -1.401    | 0.6236    |
| +NA     | 6      | -0.6969 | 0.49563   | -1.709    | 0.3153    |

Std Error uses a pooled estimate of error variance

**Means Comparisons**

**Comparisons with a control using Dunnett's Method**

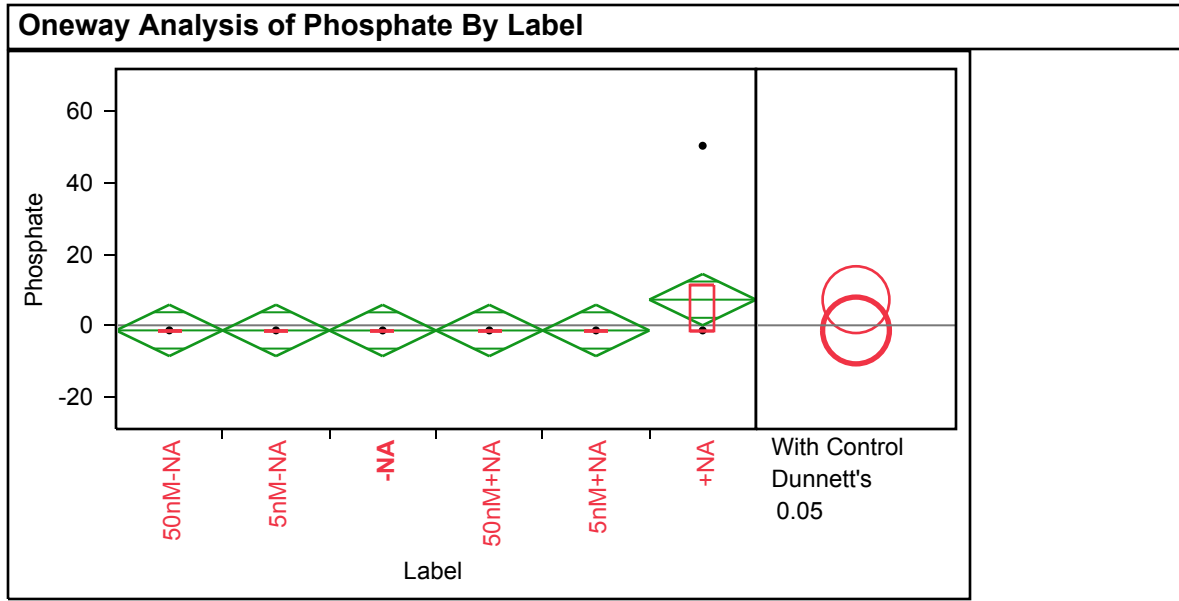

| Quantiles |          |          |          |          |          |          |          |
|-----------|----------|----------|----------|----------|----------|----------|----------|
| Level     | Minimum  | 10%      | 25%      | Median   | 75%      | 90%      | Maximum  |
| 50nM-NA   | -1.4391  | -1.4391  | -1.43009 | -1.42512 | -1.42045 | -1.41872 | -1.41872 |
| 5nM-NA    | -1.46884 | -1.46884 | -1.45524 | -1.43529 | -1.42503 | -1.42415 | -1.42415 |
| -NA       | -1.46666 | -1.46666 | -1.46632 | -1.45144 | -1.44012 | -1.43786 | -1.43786 |
| 50nM+NA   | -1.45565 | -1.45565 | -1.45359 | -1.45148 | -1.44591 | -1.44105 | -1.44105 |
| 5nM+NA    | -1.45015 | -1.45015 | -1.44958 | -1.44476 | -1.437   | -1.43282 | -1.43282 |
| +NA       | -1.44658 | -1.44658 | -1.44622 | -1.4399  | 11.54309 | 50.47844 | 50.47844 |

**Oneway Anova**

**Summary of Fit**

|                            |          |
|----------------------------|----------|
| Rsquare                    | 0.14288  |
| Adj Rsquare                | 2.673e-5 |
| Root Mean Square Error     | 8.65334  |
| Mean of Response           | -2e-16   |
| Observations (or Sum Wgts) | 36       |

**Analysis of Variance**

| Source   | DF | Sum of Squares | Mean Square | F Ratio | Prob > F |
|----------|----|----------------|-------------|---------|----------|
| Label    | 5  | 374.4715       | 74.8943     | 1.0002  | 0.4345   |
| Error    | 30 | 2246.4088      | 74.8803     |         |          |
| C. Total | 35 | 2620.8804      |             |         |          |

**Means for Oneway Anova**

| Level   | Number | Mean    | Std Error | Lower 95% | Upper 95% |
|---------|--------|---------|-----------|-----------|-----------|
| 50nM-NA | 6      | -1.4260 | 3.5327    | -8.641    | 5.789     |
| 5nM-NA  | 6      | -1.4399 | 3.5327    | -8.655    | 5.775     |
| -NA     | 6      | -1.4524 | 3.5327    | -8.667    | 5.762     |
| 50nM+NA | 6      | -1.4500 | 3.5327    | -8.665    | 5.765     |
| 5nM+NA  | 6      | -1.4434 | 3.5327    | -8.658    | 5.771     |
| +NA     | 6      | 7.2118  | 3.5327    | -0.003    | 14.427    |

Std Error uses a pooled estimate of error variance

**Means Comparisons**

**Comparisons with a control using Dunnett's Method**

**Oneway Analysis of Phosphatidylglycerol By Label**

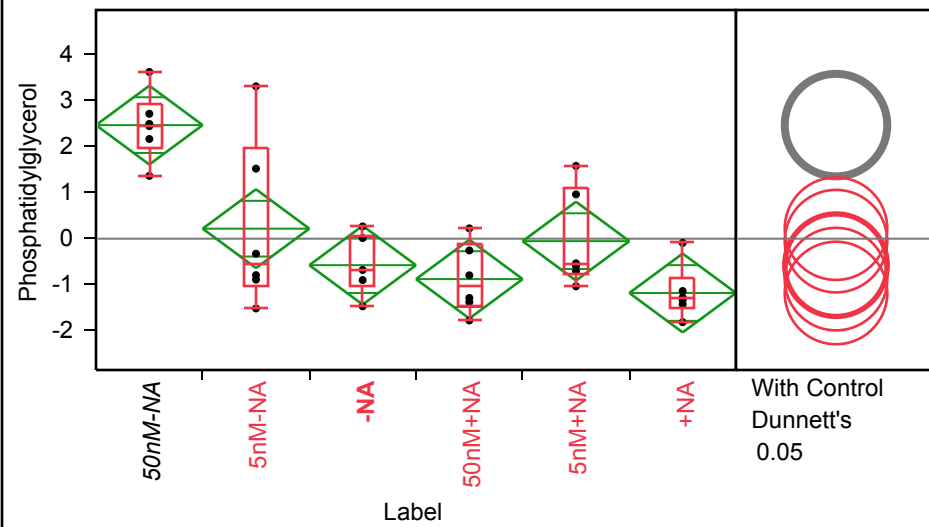

**Quantiles**

| Level   | Minimum  | 10%      | 25%      | Median   | 75%      | 90%      | Maximum  |
|---------|----------|----------|----------|----------|----------|----------|----------|
| 50nM-NA | 1.364098 | 1.364098 | 1.964677 | 2.468859 | 2.939957 | 3.621591 | 3.621591 |
| 5nM-NA  | -1.51534 | -1.51534 | -1.04553 | -0.55927 | 1.967811 | 3.308483 | 3.308483 |
| -NA     | -1.46828 | -1.46828 | -1.04192 | -0.68097 | 0.077199 | 0.266619 | 0.266619 |
| 50nM+NA | -1.77567 | -1.77567 | -1.4763  | -1.04089 | -0.13543 | 0.223889 | 0.223889 |
| 5nM+NA  | -1.03344 | -1.03344 | -0.78608 | -0.56236 | 1.116742 | 1.580587 | 1.580587 |
| +NA     | -1.81343 | -1.81343 | -1.52136 | -1.30432 | -0.87515 | -0.09147 | -0.09147 |

**Oneway Anova**

**Summary of Fit**

|                            |          |
|----------------------------|----------|
| Rsquare                    | 0.620965 |
| Adj Rsquare                | 0.557792 |
| Root Mean Square Error     | 1.026194 |
| Mean of Response           | -8.3e-10 |
| Observations (or Sum Wgts) | 36       |

**Analysis of Variance**

| Source   | DF | Sum of Squares | Mean Square | F Ratio | Prob > F |
|----------|----|----------------|-------------|---------|----------|
| Label    | 5  | 51.756806      | 10.3514     | 9.8297  | <.0001 * |
| Error    | 30 | 31.592225      | 1.0531      |         |          |
| C. Total | 35 | 83.349031      |             |         |          |

**Means for Oneway Anova**

| Level   | Number | Mean    | Std Error | Lower 95% | Upper 95% |
|---------|--------|---------|-----------|-----------|-----------|
| 50nM-NA | 6      | 2.4668  | 0.41894   | 1.611     | 3.322     |
| 5nM-NA  | 6      | 0.2178  | 0.41894   | -0.638    | 1.073     |
| -NA     | 6      | -0.5749 | 0.41894   | -1.430    | 0.281     |
| 50nM+NA | 6      | -0.8775 | 0.41894   | -1.733    | -0.022    |
| 5nM+NA  | 6      | -0.0532 | 0.41894   | -0.909    | 0.802     |
| +NA     | 6      | -1.1790 | 0.41894   | -2.035    | -0.323    |

Std Error uses a pooled estimate of error variance

**Means Comparisons**

**Comparisons with a control using Dunnett's Method**



**Oneway Analysis of phosphoenolpyruvate By Label**

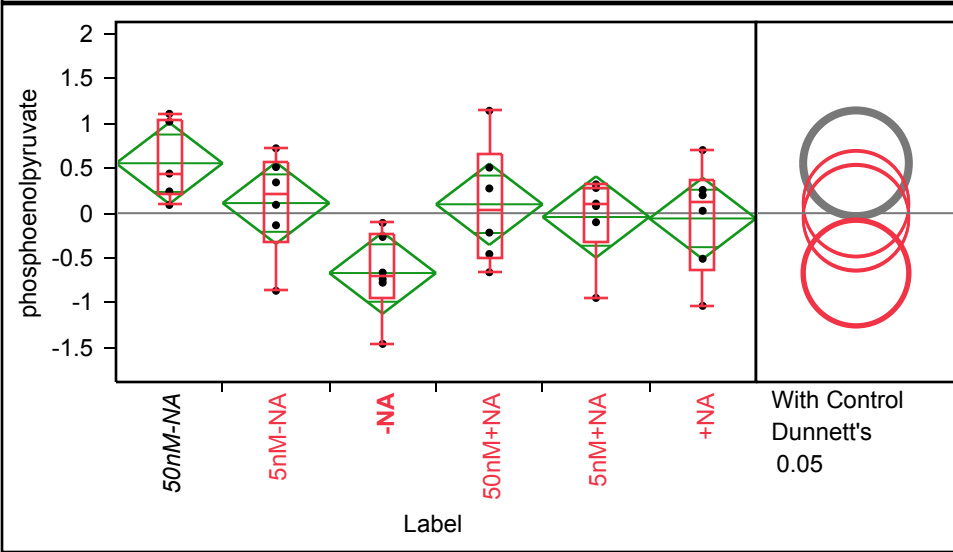

**Quantiles**

| Level   | Minimum  | 10%      | 25%      | Median   | 75%      | 90%      | Maximum  |
|---------|----------|----------|----------|----------|----------|----------|----------|
| 50nM-NA | 0.091798 | 0.091798 | 0.205212 | 0.439536 | 1.04277  | 1.108814 | 1.108814 |
| 5nM-NA  | -0.86571 | -0.86571 | -0.31723 | 0.218704 | 0.566813 | 0.724108 | 0.724108 |
| -NA     | -1.45867 | -1.45867 | -0.94617 | -0.69956 | -0.22598 | -0.10845 | -0.10845 |
| 50nM+NA | -0.65918 | -0.65918 | -0.50651 | 0.029693 | 0.66748  | 1.142844 | 1.142844 |
| 5nM+NA  | -0.94562 | -0.94562 | -0.31186 | 0.093095 | 0.291533 | 0.321844 | 0.321844 |
| +NA     | -1.03391 | -1.03391 | -0.63999 | 0.113752 | 0.370229 | 0.703852 | 0.703852 |

**Oneway Anova**

**Summary of Fit**

|                            |          |
|----------------------------|----------|
| Rsquare                    | 0.346842 |
| Adj Rsquare                | 0.237982 |
| Root Mean Square Error     | 0.543501 |
| Mean of Response           | 5.56e-10 |
| Observations (or Sum Wgts) | 36       |

**Analysis of Variance**

| Source   | DF | Sum of Squares | Mean Square | F Ratio | Prob > F |
|----------|----|----------------|-------------|---------|----------|
| Label    | 5  | 4.705828       | 0.941166    | 3.1861  | 0.0200 * |
| Error    | 30 | 8.861810       | 0.295394    |         |          |
| C. Total | 35 | 13.567639      |             |         |          |

**Means for Oneway Anova**

| Level   | Number | Mean     | Std Error | Lower 95% | Upper 95% |
|---------|--------|----------|-----------|-----------|-----------|
| 50nM-NA | 6      | 0.55724  | 0.22188   | 0.104     | 1.010     |
| 5nM-NA  | 6      | 0.11263  | 0.22188   | -0.341    | 0.566     |
| -NA     | 6      | -0.66779 | 0.22188   | -1.121    | -0.215    |
| 50nM+NA | 6      | 0.09941  | 0.22188   | -0.354    | 0.553     |
| 5nM+NA  | 6      | -0.04279 | 0.22188   | -0.496    | 0.410     |
| +NA     | 6      | -0.05870 | 0.22188   | -0.512    | 0.394     |

Std Error uses a pooled estimate of error variance

**Means Comparisons**

**Comparisons with a control using Dunnett's Method**

**Oneway Analysis of Phosphorylcholine By Label**

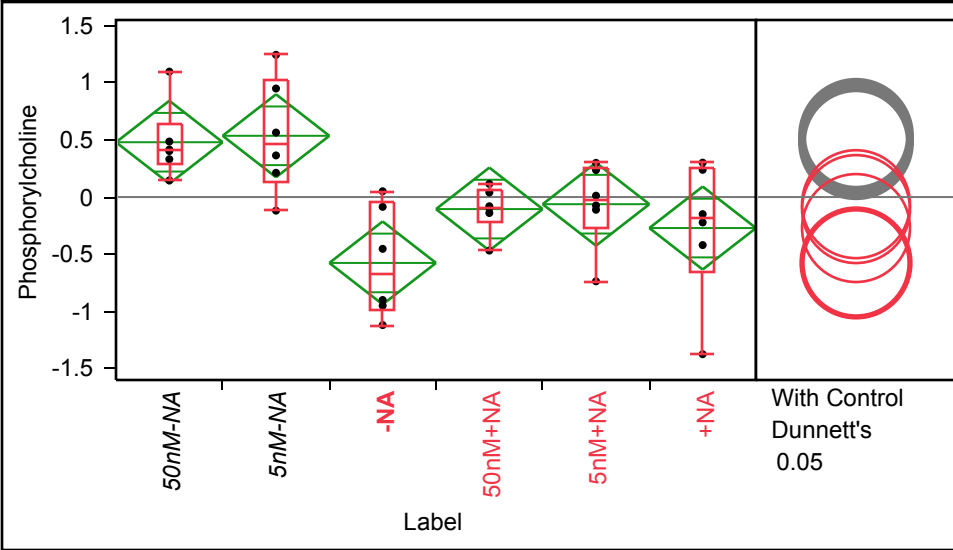

**Quantiles**

| Level   | Minimum  | 10%      | 25%      | Median   | 75%      | 90%      | Maximum  |
|---------|----------|----------|----------|----------|----------|----------|----------|
| 50nM-NA | 0.145823 | 0.145823 | 0.284843 | 0.409227 | 0.638926 | 1.098043 | 1.098043 |
| 5nM-NA  | -0.11878 | -0.11878 | 0.12957  | 0.464459 | 1.0239   | 1.244937 | 1.244937 |
| -NA     | -1.12087 | -1.12087 | -0.99318 | -0.67735 | -0.05156 | 0.050722 | 0.050722 |
| 50nM+NA | -0.46869 | -0.46869 | -0.22202 | -0.08954 | 0.058848 | 0.115141 | 0.115141 |
| 5nM+NA  | -0.73752 | -0.73752 | -0.26787 | -0.03085 | 0.252016 | 0.29926  | 0.29926  |
| +NA     | -1.37581 | -1.37581 | -0.65933 | -0.18592 | 0.254196 | 0.301014 | 0.301014 |

**Oneway Anova**

**Summary of Fit**

|                            |          |
|----------------------------|----------|
| Rsquare                    | 0.497634 |
| Adj Rsquare                | 0.413906 |
| Root Mean Square Error     | 0.435493 |
| Mean of Response           | -2.8e-10 |
| Observations (or Sum Wgts) | 36       |

**Analysis of Variance**

| Source   | DF | Sum of Squares | Mean Square | F Ratio | Prob > F |
|----------|----|----------------|-------------|---------|----------|
| Label    | 5  | 5.636041       | 1.12721     | 5.9435  | 0.0006 * |
| Error    | 30 | 5.689634       | 0.18965     |         |          |
| C. Total | 35 | 11.325675      |             |         |          |

**Means for Oneway Anova**

| Level   | Number | Mean     | Std Error | Lower 95% | Upper 95% |
|---------|--------|----------|-----------|-----------|-----------|
| 50nM-NA | 6      | 0.47990  | 0.17779   | 0.1168    | 0.8430    |
| 5nM-NA  | 6      | 0.53627  | 0.17779   | 0.1732    | 0.8994    |
| -NA     | 6      | -0.57685 | 0.17779   | -0.9399   | -0.2138   |
| 50nM+NA | 6      | -0.10539 | 0.17779   | -0.4685   | 0.2577    |
| 5nM+NA  | 6      | -0.06250 | 0.17779   | -0.4256   | 0.3006    |
| +NA     | 6      | -0.27143 | 0.17779   | -0.6345   | 0.0917    |

Std Error uses a pooled estimate of error variance

**Means Comparisons**

**Comparisons with a control using Dunnnett's Method**

**Oneway Analysis of p-hydroxybenzoate By Label**

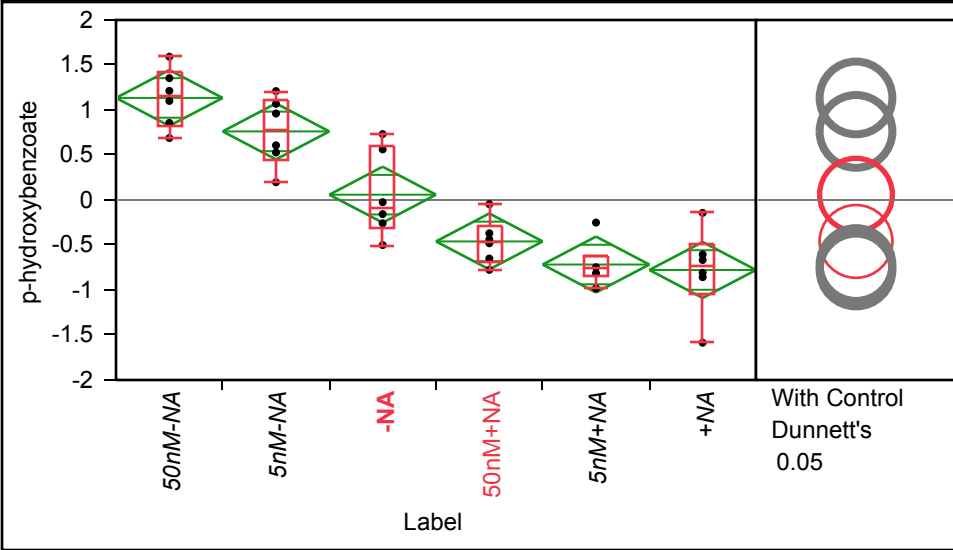

**Quantiles**

| Level   | Minimum  | 10%      | 25%      | Median   | 75%      | 90%      | Maximum  |
|---------|----------|----------|----------|----------|----------|----------|----------|
| 50nM-NA | 0.688577 | 0.688577 | 0.814607 | 1.156671 | 1.413307 | 1.59205  | 1.59205  |
| 5nM-NA  | 0.197021 | 0.197021 | 0.445404 | 0.784159 | 1.103952 | 1.209972 | 1.209972 |
| -NA     | -0.50085 | -0.50085 | -0.31924 | -0.09062 | 0.605008 | 0.73207  | 0.73207  |
| 50nM+NA | -0.77617 | -0.77617 | -0.68194 | -0.45932 | -0.28892 | -0.04655 | -0.04655 |
| 5nM+NA  | -0.98226 | -0.98226 | -0.85538 | -0.75473 | -0.62299 | -0.25077 | -0.25077 |
| +NA     | -1.58548 | -1.58548 | -1.03932 | -0.73743 | -0.48979 | -0.14318 | -0.14318 |

**Oneway Anova**

**Summary of Fit**

|                            |          |
|----------------------------|----------|
| Rsquare                    | 0.821664 |
| Adj Rsquare                | 0.791941 |
| Root Mean Square Error     | 0.372768 |
| Mean of Response           | 2.78e-10 |
| Observations (or Sum Wgts) | 36       |

**Analysis of Variance**

| Source   | DF | Sum of Squares | Mean Square | F Ratio | Prob > F |
|----------|----|----------------|-------------|---------|----------|
| Label    | 5  | 19.206665      | 3.84133     | 27.6443 | <.0001 * |
| Error    | 30 | 4.168675       | 0.13896     |         |          |
| C. Total | 35 | 23.375341      |             |         |          |

**Means for Oneway Anova**

| Level   | Number | Mean    | Std Error | Lower 95% | Upper 95% |
|---------|--------|---------|-----------|-----------|-----------|
| 50nM-NA | 6      | 1.1341  | 0.15218   | 0.823     | 1.445     |
| 5nM-NA  | 6      | 0.7620  | 0.15218   | 0.451     | 1.073     |
| -NA     | 6      | 0.0590  | 0.15218   | -0.252    | 0.370     |
| 50nM+NA | 6      | -0.4603 | 0.15218   | -0.771    | -0.149    |
| 5nM+NA  | 6      | -0.7171 | 0.15218   | -1.028    | -0.406    |
| +NA     | 6      | -0.7777 | 0.15218   | -1.088    | -0.467    |

Std Error uses a pooled estimate of error variance

**Means Comparisons**

**Comparisons with a control using Dunnnett's Method**

**Oneway Analysis of PI(16:0/20:2) By Label**

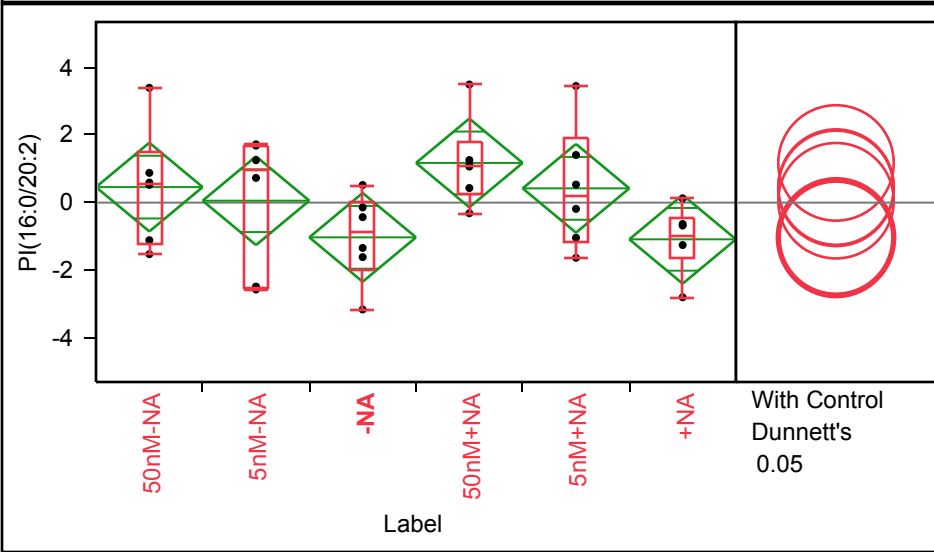

**Quantiles**

| Level   | Minimum  | 10%      | 25%      | Median   | 75%      | 90%      | Maximum  |
|---------|----------|----------|----------|----------|----------|----------|----------|
| 50nM-NA | -1.52238 | -1.52238 | -1.21273 | 0.557908 | 1.506337 | 3.389473 | 3.389473 |
| 5nM-NA  | -2.56583 | -2.56583 | -2.50139 | 0.991304 | 1.691559 | 1.721066 | 1.721066 |
| -NA     | -3.1556  | -3.1556  | -1.99551 | -0.88355 | 0.024061 | 0.520259 | 0.520259 |
| 50nM+NA | -0.31419 | -0.31419 | 0.244461 | 1.084895 | 1.814674 | 3.48703  | 3.48703  |
| 5nM+NA  | -1.62984 | -1.62984 | -1.18487 | 0.172959 | 1.916015 | 3.443508 | 3.443508 |
| +NA     | -2.7943  | -2.7943  | -1.64617 | -0.96499 | -0.4439  | 0.120164 | 0.120164 |

**Oneway Anova**

**Summary of Fit**

|                            |          |
|----------------------------|----------|
| Rsquare                    | 0.244291 |
| Adj Rsquare                | 0.11834  |
| Root Mean Square Error     | 1.571043 |
| Mean of Response           | -4.9e-17 |
| Observations (or Sum Wgts) | 36       |

**Analysis of Variance**

| Source   | DF | Sum of Squares | Mean Square | F Ratio | Prob > F |
|----------|----|----------------|-------------|---------|----------|
| Label    | 5  | 23.935938      | 4.78719     | 1.9396  | 0.1171   |
| Error    | 30 | 74.045255      | 2.46818     |         |          |
| C. Total | 35 | 97.981193      |             |         |          |

**Means for Oneway Anova**

| Level   | Number | Mean    | Std Error | Lower 95% | Upper 95% |
|---------|--------|---------|-----------|-----------|-----------|
| 50nM-NA | 6      | 0.4587  | 0.64138   | -0.851    | 1.7685    |
| 5nM-NA  | 6      | 0.0566  | 0.64138   | -1.253    | 1.3665    |
| -NA     | 6      | -1.0254 | 0.64138   | -2.335    | 0.2844    |
| 50nM+NA | 6      | 1.1718  | 0.64138   | -0.138    | 2.4816    |
| 5nM+NA  | 6      | 0.4216  | 0.64138   | -0.888    | 1.7315    |
| +NA     | 6      | -1.0833 | 0.64138   | -2.393    | 0.2266    |

Std Error uses a pooled estimate of error variance

**Means Comparisons**

**Comparisons with a control using Dunnett's Method**

**Oneway Analysis of PI(16:0/22:4) By Label**

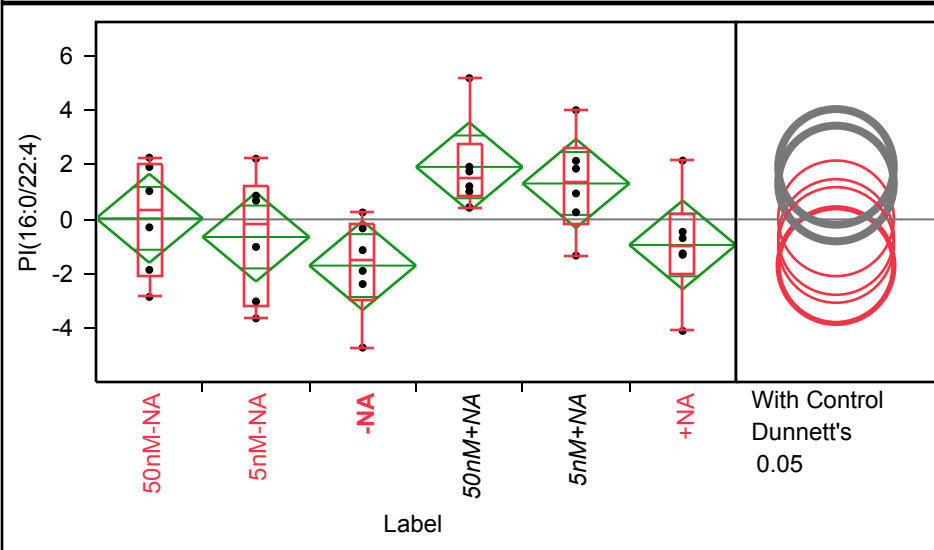

**Quantiles**

| Level   | Minimum  | 10%      | 25%      | Median   | 75%      | 90%      | Maximum  |
|---------|----------|----------|----------|----------|----------|----------|----------|
| 50nM-NA | -2.83733 | -2.83733 | -2.09515 | 0.371668 | 2.001726 | 2.257257 | 2.257257 |
| 5nM-NA  | -3.6238  | -3.6238  | -3.15839 | -0.16177 | 1.201808 | 2.217715 | 2.217715 |
| -NA     | -4.69284 | -4.69284 | -2.94823 | -1.50585 | -0.18433 | 0.251217 | 0.251217 |
| 50nM+NA | 0.44537  | 0.44537  | 0.875207 | 1.482084 | 2.736117 | 5.167785 | 5.167785 |
| 5nM+NA  | -1.32404 | -1.32404 | -0.13621 | 1.402335 | 2.605522 | 3.996665 | 3.996665 |
| +NA     | -4.08301 | -4.08301 | -1.99208 | -0.96557 | 0.196928 | 2.150489 | 2.150489 |

**Oneway Anova**

**Summary of Fit**

|                            |          |
|----------------------------|----------|
| Rsquare                    | 0.334797 |
| Adj Rsquare                | 0.223929 |
| Root Mean Square Error     | 1.949667 |
| Mean of Response           | -7.4e-17 |
| Observations (or Sum Wgts) | 36       |

**Analysis of Variance**

| Source   | DF | Sum of Squares | Mean Square | F Ratio | Prob > F |
|----------|----|----------------|-------------|---------|----------|
| Label    | 5  | 57.39428       | 11.4789     | 3.0198  | 0.0252 * |
| Error    | 30 | 114.03604      | 3.8012      |         |          |
| C. Total | 35 | 171.43032      |             |         |          |

**Means for Oneway Anova**

| Level   | Number | Mean    | Std Error | Lower 95% | Upper 95% |
|---------|--------|---------|-----------|-----------|-----------|
| 50nM-NA | 6      | 0.0387  | 0.79595   | -1.587    | 1.664     |
| 5nM-NA  | 6      | -0.6450 | 0.79595   | -2.270    | 0.981     |
| -NA     | 6      | -1.6916 | 0.79595   | -3.317    | -0.066    |
| 50nM+NA | 6      | 1.9202  | 0.79595   | 0.295     | 3.546     |
| 5nM+NA  | 6      | 1.3131  | 0.79595   | -0.312    | 2.939     |
| +NA     | 6      | -0.9355 | 0.79595   | -2.561    | 0.690     |

Std Error uses a pooled estimate of error variance

**Means Comparisons**

**Comparisons with a control using Dunnett's Method**

**Oneway Analysis of PI(16:1/22:4) By Label**

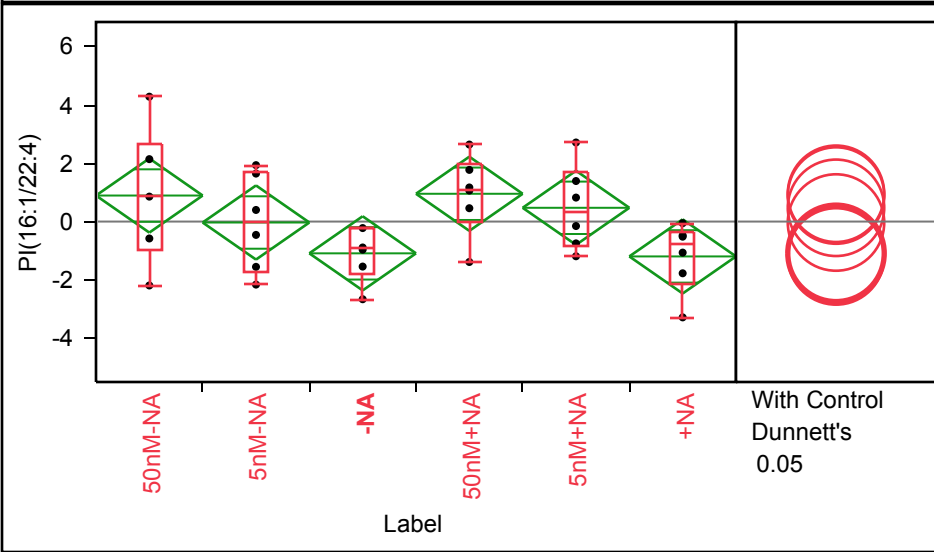

**Quantiles**

| Level   | Minimum  | 10%      | 25%      | Median   | 75%      | 90%      | Maximum  |
|---------|----------|----------|----------|----------|----------|----------|----------|
| 50nM-NA | -2.19382 | -2.19382 | -0.98366 | 0.853232 | 2.678389 | 4.286351 | 4.286351 |
| 5nM-NA  | -2.16334 | -2.16334 | -1.70677 | -0.02982 | 1.719236 | 1.936225 | 1.936225 |
| -NA     | -2.66615 | -2.66615 | -1.82529 | -0.92695 | -0.24766 | -0.22351 | -0.22351 |
| 50nM+NA | -1.38756 | -1.38756 | -0.00321 | 1.117559 | 1.991125 | 2.643096 | 2.643096 |
| 5nM+NA  | -1.19089 | -1.19089 | -0.86002 | 0.334954 | 1.722166 | 2.713754 | 2.713754 |
| +NA     | -3.28857 | -3.28857 | -2.15364 | -0.79221 | -0.3708  | -0.05564 | -0.05564 |

**Oneway Anova**

**Summary of Fit**

|                            |          |
|----------------------------|----------|
| Rsquare                    | 0.281161 |
| Adj Rsquare                | 0.161355 |
| Root Mean Square Error     | 1.525969 |
| Mean of Response           | 5.556e-9 |
| Observations (or Sum Wgts) | 36       |

**Analysis of Variance**

| Source   | DF | Sum of Squares | Mean Square | F Ratio | Prob > F |
|----------|----|----------------|-------------|---------|----------|
| Label    | 5  | 27.323510      | 5.46470     | 2.3468  | 0.0653   |
| Error    | 30 | 69.857467      | 2.32858     |         |          |
| C. Total | 35 | 97.180977      |             |         |          |

**Means for Oneway Anova**

| Level   | Number | Mean    | Std Error | Lower 95% | Upper 95% |
|---------|--------|---------|-----------|-----------|-----------|
| 50nM-NA | 6      | 0.8935  | 0.62297   | -0.379    | 2.1658    |
| 5nM-NA  | 6      | -0.0324 | 0.62297   | -1.305    | 1.2399    |
| -NA     | 6      | -1.0907 | 0.62297   | -2.363    | 0.1816    |
| 50nM+NA | 6      | 0.9538  | 0.62297   | -0.319    | 2.2261    |
| 5nM+NA  | 6      | 0.4724  | 0.62297   | -0.800    | 1.7447    |
| +NA     | 6      | -1.1966 | 0.62297   | -2.469    | 0.0756    |

Std Error uses a pooled estimate of error variance

**Means Comparisons**

**Comparisons with a control using Dunnett's Method**

**Oneway Analysis of Piperidine By Label**

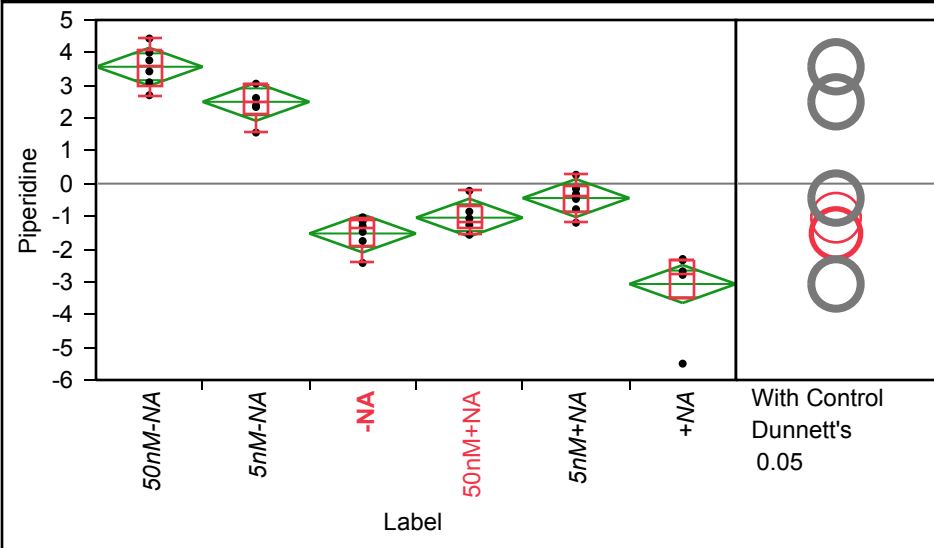

**Quantiles**

| Level   | Minimum  | 10%      | 25%      | Median   | 75%      | 90%      | Maximum  |
|---------|----------|----------|----------|----------|----------|----------|----------|
| 50nM-NA | 2.700234 | 2.700234 | 2.997012 | 3.596998 | 4.110381 | 4.433493 | 4.433493 |
| 5nM-NA  | 1.561405 | 1.561405 | 2.146471 | 2.50338  | 3.040403 | 3.054542 | 3.054542 |
| -NA     | -2.4241  | -2.4241  | -1.92091 | -1.38527 | -1.12663 | -1.03309 | -1.03309 |
| 50nM+NA | -1.5633  | -1.5633  | -1.34529 | -1.16362 | -0.69635 | -0.22045 | -0.22045 |
| 5nM+NA  | -1.19426 | -1.19426 | -0.88507 | -0.39311 | -0.04942 | 0.27164  | 0.27164  |
| +NA     | -5.50072 | -5.50072 | -3.46759 | -2.73349 | -2.33144 | -2.30319 | -2.30319 |

**Oneway Anova**

**Summary of Fit**

|                            |          |
|----------------------------|----------|
| Rsquare                    | 0.929776 |
| Adj Rsquare                | 0.918072 |
| Root Mean Square Error     | 0.695298 |
| Mean of Response           | 2.778e-9 |
| Observations (or Sum Wgts) | 36       |

**Analysis of Variance**

| Source   | DF | Sum of Squares | Mean Square | F Ratio | Prob > F |
|----------|----|----------------|-------------|---------|----------|
| Label    | 5  | 192.02484      | 38.4050     | 79.4410 | <.0001 * |
| Error    | 30 | 14.50320       | 0.4834      |         |          |
| C. Total | 35 | 206.52803      |             |         |          |

**Means for Oneway Anova**

| Level   | Number | Mean    | Std Error | Lower 95% | Upper 95% |
|---------|--------|---------|-----------|-----------|-----------|
| 50nM-NA | 6      | 3.5711  | 0.28385   | 2.991     | 4.151     |
| 5nM-NA  | 6      | 2.5000  | 0.28385   | 1.920     | 3.080     |
| -NA     | 6      | -1.5231 | 0.28385   | -2.103    | -0.943    |
| 50nM+NA | 6      | -1.0398 | 0.28385   | -1.619    | -0.460    |
| 5nM+NA  | 6      | -0.4412 | 0.28385   | -1.021    | 0.138     |
| +NA     | 6      | -3.0669 | 0.28385   | -3.647    | -2.487    |

Std Error uses a pooled estimate of error variance

**Means Comparisons**

**Comparisons with a control using Dunnett's Method**

**Oneway Analysis of proline By Label**

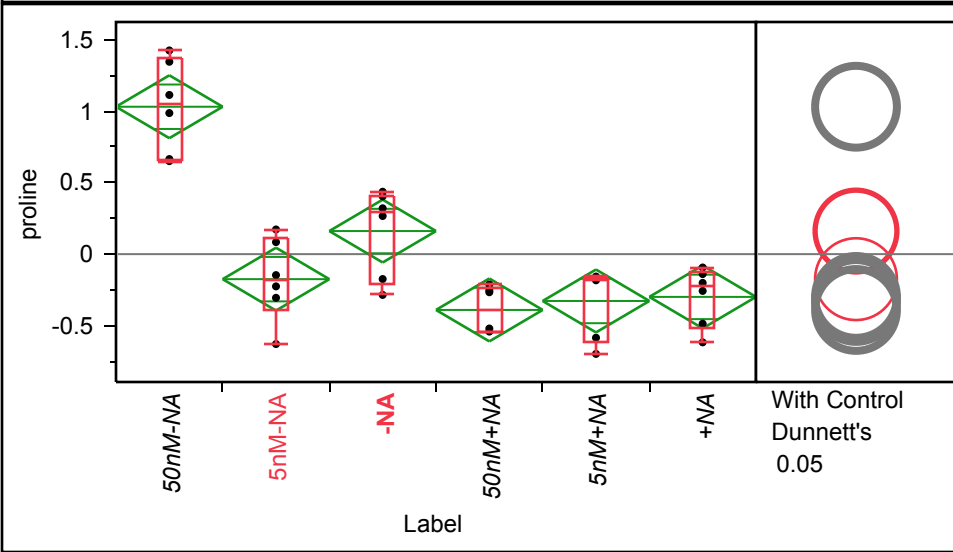

**Quantiles**

| Level   | Minimum  | 10%      | 25%      | Median   | 75%      | 90%      | Maximum  |
|---------|----------|----------|----------|----------|----------|----------|----------|
| 50nM-NA | 0.651009 | 0.651009 | 0.661819 | 1.050886 | 1.36648  | 1.425785 | 1.425785 |
| 5nM-NA  | -0.62946 | -0.62946 | -0.38672 | -0.18628 | 0.106265 | 0.17257  | 0.17257  |
| -NA     | -0.2856  | -0.2856  | -0.20218 | 0.293765 | 0.412809 | 0.436724 | 0.436724 |
| 50nM+NA | -0.54786 | -0.54786 | -0.54357 | -0.39383 | -0.24365 | -0.21278 | -0.21278 |
| 5nM+NA  | -0.69834 | -0.69834 | -0.61351 | -0.17871 | -0.16665 | -0.15695 | -0.15695 |
| +NA     | -0.61757 | -0.61757 | -0.51971 | -0.2294  | -0.12802 | -0.09356 | -0.09356 |

**Oneway Anova**

**Summary of Fit**

|                            |          |
|----------------------------|----------|
| Rsquare                    | 0.808585 |
| Adj Rsquare                | 0.776683 |
| Root Mean Square Error     | 0.263926 |
| Mean of Response           | 5.56e-10 |
| Observations (or Sum Wgts) | 36       |

**Analysis of Variance**

| Source   | DF | Sum of Squares | Mean Square | F Ratio | Prob > F |
|----------|----|----------------|-------------|---------|----------|
| Label    | 5  | 8.827449       | 1.76549     | 25.3456 | <.0001 * |
| Error    | 30 | 2.089703       | 0.06966     |         |          |
| C. Total | 35 | 10.917151      |             |         |          |

**Means for Oneway Anova**

| Level   | Number | Mean    | Std Error | Lower 95% | Upper 95% |
|---------|--------|---------|-----------|-----------|-----------|
| 50nM-NA | 6      | 1.0318  | 0.10775   | 0.8117    | 1.252     |
| 5nM-NA  | 6      | -0.1752 | 0.10775   | -0.3952   | 0.045     |
| -NA     | 6      | 0.1615  | 0.10775   | -0.0585   | 0.382     |
| 50nM+NA | 6      | -0.3907 | 0.10775   | -0.6108   | -0.171    |
| 5nM+NA  | 6      | -0.3280 | 0.10775   | -0.5480   | -0.108    |
| +NA     | 6      | -0.2994 | 0.10775   | -0.5195   | -0.079    |

Std Error uses a pooled estimate of error variance

**Means Comparisons**

**Comparisons with a control using Dunnnett's Method**



**Oneway Analysis of purine By Label**

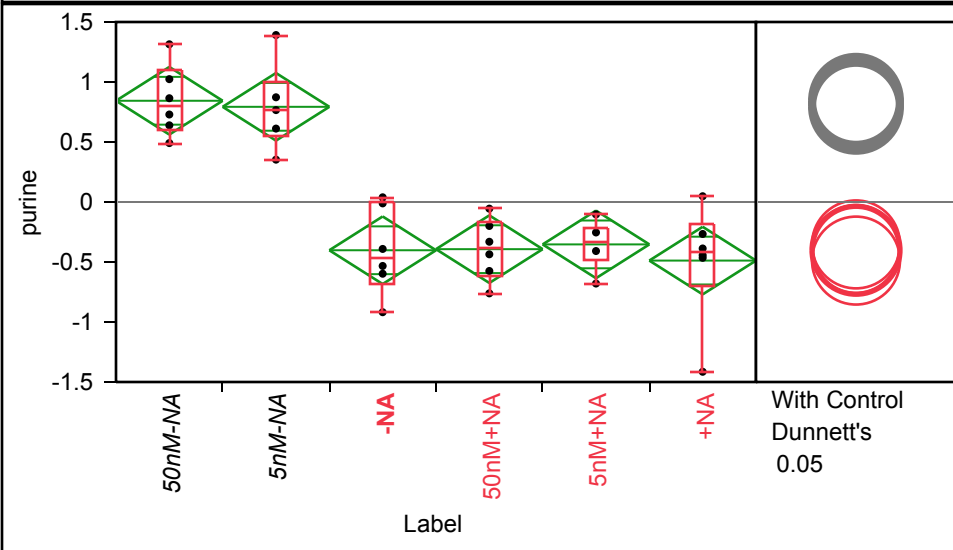

**Quantiles**

| Level   | Minimum  | 10%      | 25%      | Median   | 75%      | 90%      | Maximum  |
|---------|----------|----------|----------|----------|----------|----------|----------|
| 50nM-NA | 0.490956 | 0.490956 | 0.60196  | 0.796907 | 1.096366 | 1.314238 | 1.314238 |
| 5nM-NA  | 0.352961 | 0.352961 | 0.54705  | 0.765187 | 1.002278 | 1.391232 | 1.391232 |
| -NA     | -0.91844 | -0.91844 | -0.67795 | -0.46213 | 0.001149 | 0.039167 | 0.039167 |
| 50nM+NA | -0.76134 | -0.76134 | -0.62142 | -0.38367 | -0.16356 | -0.05543 | -0.05543 |
| 5nM+NA  | -0.67949 | -0.67949 | -0.47966 | -0.3351  | -0.2163  | -0.1035  | -0.1035  |
| +NA     | -1.41477 | -1.41477 | -0.70261 | -0.41535 | -0.18787 | 0.048027 | 0.048027 |

**Oneway Anova**

**Summary of Fit**

|                            |          |
|----------------------------|----------|
| Rsquare                    | 0.7798   |
| Adj Rsquare                | 0.7431   |
| Root Mean Square Error     | 0.337778 |
| Mean of Response           | -5.6e-10 |
| Observations (or Sum Wgts) | 36       |

**Analysis of Variance**

| Source   | DF | Sum of Squares | Mean Square | F Ratio | Prob > F |
|----------|----|----------------|-------------|---------|----------|
| Label    | 5  | 12.121294      | 2.42426     | 21.2479 | <.0001 * |
| Error    | 30 | 3.422815       | 0.11409     |         |          |
| C. Total | 35 | 15.544109      |             |         |          |

**Means for Oneway Anova**

| Level   | Number | Mean     | Std Error | Lower 95% | Upper 95% |
|---------|--------|----------|-----------|-----------|-----------|
| 50nM-NA | 6      | 0.84362  | 0.13790   | 0.5620    | 1.125     |
| 5nM-NA  | 6      | 0.79316  | 0.13790   | 0.5115    | 1.075     |
| -NA     | 6      | -0.40214 | 0.13790   | -0.6838   | -0.121    |
| 50nM+NA | 6      | -0.39308 | 0.13790   | -0.6747   | -0.111    |
| 5nM+NA  | 6      | -0.35336 | 0.13790   | -0.6350   | -0.072    |
| +NA     | 6      | -0.48820 | 0.13790   | -0.7698   | -0.207    |

Std Error uses a pooled estimate of error variance

**Means Comparisons**

**Comparisons with a control using Dunnett's Method**

**Oneway Analysis of pyridoxine By Label**

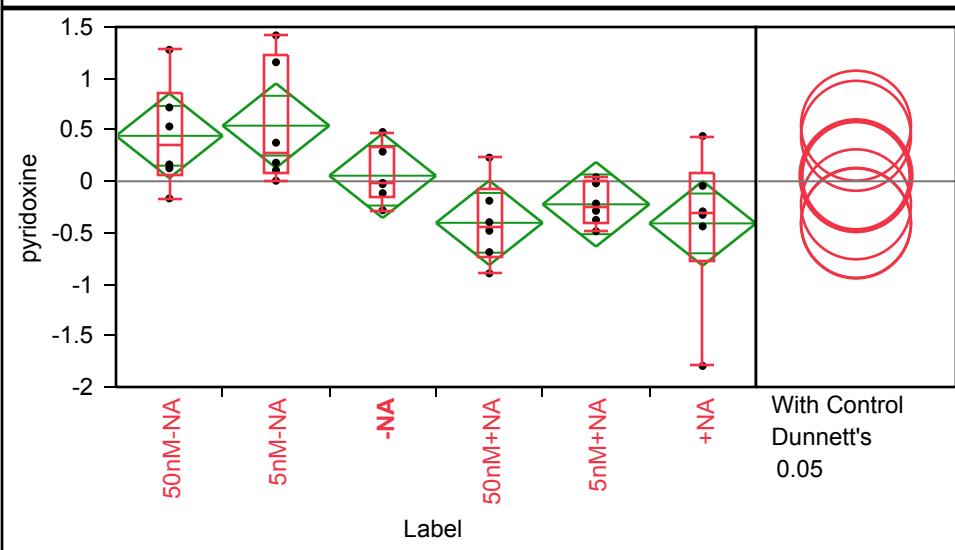

**Quantiles**

| Level   | Minimum  | 10%      | 25%      | Median   | 75%      | 90%      | Maximum  |
|---------|----------|----------|----------|----------|----------|----------|----------|
| 50nM-NA | -0.1668  | -0.1668  | 0.053242 | 0.348405 | 0.858078 | 1.278137 | 1.278137 |
| 5nM-NA  | 0.005443 | 0.005443 | 0.08152  | 0.27809  | 1.222583 | 1.418447 | 1.418447 |
| -NA     | -0.28162 | -0.28162 | -0.15697 | -0.02208 | 0.335844 | 0.478981 | 0.478981 |
| 50nM+NA | -0.89513 | -0.89513 | -0.7404  | -0.43943 | -0.08452 | 0.229885 | 0.229885 |
| 5nM+NA  | -0.48533 | -0.48533 | -0.4027  | -0.25186 | -0.00459 | 0.040143 | 0.040143 |
| +NA     | -1.79539 | -1.79539 | -0.77759 | -0.30926 | 0.076527 | 0.439601 | 0.439601 |

**Oneway Anova**

**Summary of Fit**

|                            |          |
|----------------------------|----------|
| Rsquare                    | 0.418017 |
| Adj Rsquare                | 0.32102  |
| Root Mean Square Error     | 0.49265  |
| Mean of Response           | -1.2e-17 |
| Observations (or Sum Wgts) | 36       |

**Analysis of Variance**

| Source   | DF | Sum of Squares | Mean Square | F Ratio | Prob > F |
|----------|----|----------------|-------------|---------|----------|
| Label    | 5  | 5.229772       | 1.04595     | 4.3096  | 0.0045 * |
| Error    | 30 | 7.281128       | 0.24270     |         |          |
| C. Total | 35 | 12.510900      |             |         |          |

**Means for Oneway Anova**

| Level   | Number | Mean     | Std Error | Lower 95% | Upper 95% |
|---------|--------|----------|-----------|-----------|-----------|
| 50nM-NA | 6      | 0.44213  | 0.20112   | 0.0314    | 0.85288   |
| 5nM-NA  | 6      | 0.54071  | 0.20112   | 0.1300    | 0.95146   |
| -NA     | 6      | 0.05432  | 0.20112   | -0.3564   | 0.46507   |
| 50nM+NA | 6      | -0.40371 | 0.20112   | -0.8145   | 0.00704   |
| 5nM+NA  | 6      | -0.22393 | 0.20112   | -0.6347   | 0.18682   |
| +NA     | 6      | -0.40952 | 0.20112   | -0.8203   | 0.00123   |

Std Error uses a pooled estimate of error variance

**Means Comparisons**

**Comparisons with a control using Dunnett's Method**

### Oneway Analysis of Pyroglutamate By Label

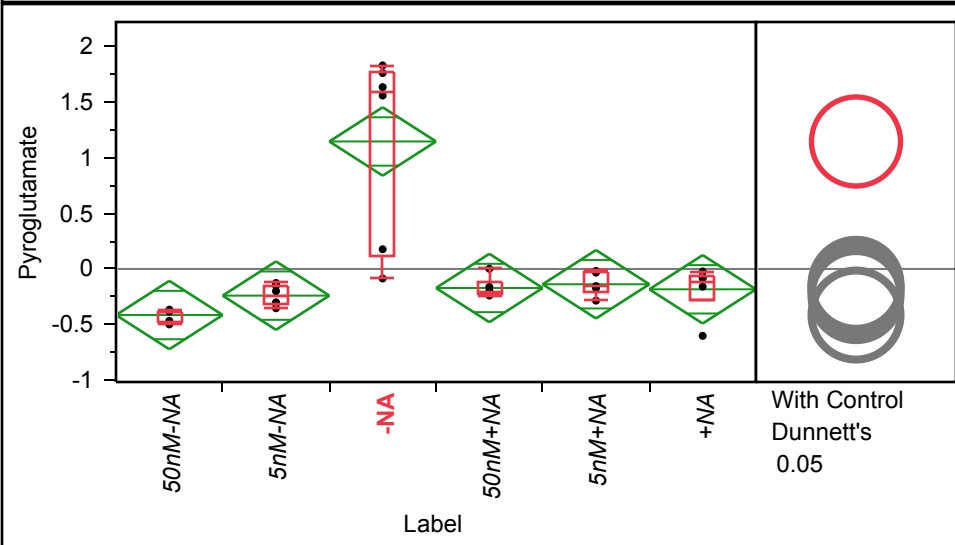

#### Quantiles

| Level   | Minimum  | 10%      | 25%      | Median   | 75%      | 90%      | Maximum  |
|---------|----------|----------|----------|----------|----------|----------|----------|
| 50nM-NA | -0.49692 | -0.49692 | -0.47294 | -0.3851  | -0.37795 | -0.36472 | -0.36472 |
| 5nM-NA  | -0.35211 | -0.35211 | -0.32005 | -0.24876 | -0.14391 | -0.12577 | -0.12577 |
| -NA     | -0.08537 | -0.08537 | 0.111188 | 1.592264 | 1.773535 | 1.824751 | 1.824751 |
| 50nM+NA | -0.23843 | -0.23843 | -0.22564 | -0.20239 | -0.1206  | 0.001689 | 0.001689 |
| 5nM+NA  | -0.28394 | -0.28394 | -0.20051 | -0.15823 | -0.029   | -0.01792 | -0.01792 |
| +NA     | -0.59984 | -0.59984 | -0.26967 | -0.12122 | -0.05873 | -0.02258 | -0.02258 |

#### Oneway Anova

##### Summary of Fit

|                            |          |
|----------------------------|----------|
| Rsquare                    | 0.704794 |
| Adj Rsquare                | 0.655593 |
| Root Mean Square Error     | 0.367854 |
| Mean of Response           | -2.8e-10 |
| Observations (or Sum Wgts) | 36       |

##### Analysis of Variance

| Source   | DF | Sum of Squares | Mean Square | F Ratio | Prob > F |
|----------|----|----------------|-------------|---------|----------|
| Label    | 5  | 9.691882       | 1.93838     | 14.3248 | <.0001 * |
| Error    | 30 | 4.059488       | 0.13532     |         |          |
| C. Total | 35 | 13.751370      |             |         |          |

##### Means for Oneway Anova

| Level   | Number | Mean    | Std Error | Lower 95% | Upper 95% |
|---------|--------|---------|-----------|-----------|-----------|
| 50nM-NA | 6      | -0.4132 | 0.15018   | -0.7199   | -0.106    |
| 5nM-NA  | 6      | -0.2391 | 0.15018   | -0.5458   | 0.068     |
| -NA     | 6      | 1.1428  | 0.15018   | 0.8361    | 1.450     |
| 50nM+NA | 6      | -0.1707 | 0.15018   | -0.4774   | 0.136     |
| 5nM+NA  | 6      | -0.1373 | 0.15018   | -0.4440   | 0.169     |
| +NA     | 6      | -0.1825 | 0.15018   | -0.4892   | 0.124     |

Std Error uses a pooled estimate of error variance

#### Means Comparisons

##### Comparisons with a control using Dunnett's Method

**Oneway Analysis of pyruvate By Label**

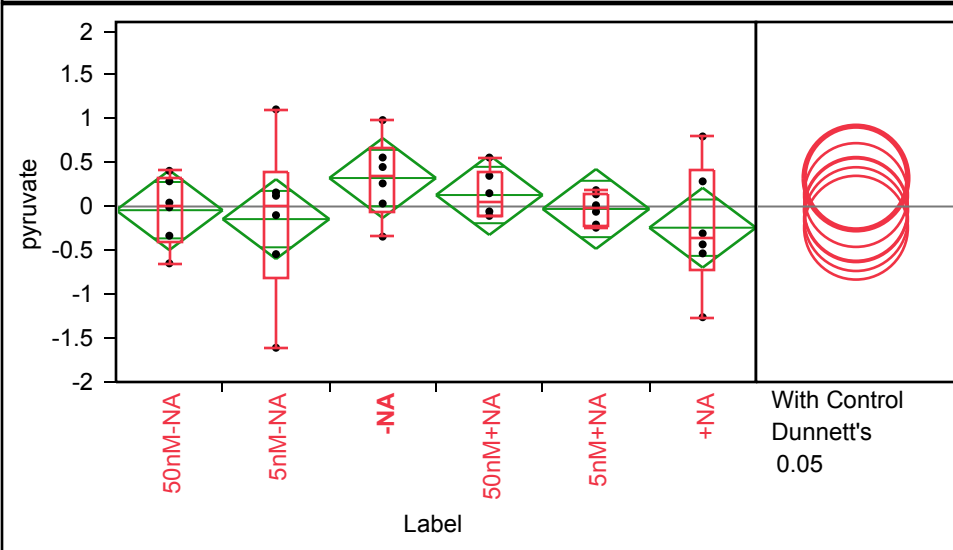

**Quantiles**

| Level   | Minimum  | 10%      | 25%      | Median   | 75%      | 90%      | Maximum  |
|---------|----------|----------|----------|----------|----------|----------|----------|
| 50nM-NA | -0.64783 | -0.64783 | -0.41165 | 0.017192 | 0.317336 | 0.406558 | 0.406558 |
| 5nM-NA  | -1.60972 | -1.60972 | -0.80955 | 0.011913 | 0.396738 | 1.106607 | 1.106607 |
| -NA     | -0.3434  | -0.3434  | -0.06043 | 0.356659 | 0.664944 | 0.984693 | 0.984693 |
| 50nM+NA | -0.11084 | -0.11084 | -0.10781 | 0.047707 | 0.401433 | 0.557671 | 0.557671 |
| 5nM+NA  | -0.24175 | -0.24175 | -0.21522 | -0.02262 | 0.150829 | 0.186146 | 0.186146 |
| +NA     | -1.26167 | -1.26167 | -0.7161  | -0.36907 | 0.414433 | 0.798305 | 0.798305 |

**Oneway Anova**

**Summary of Fit**

|                            |          |
|----------------------------|----------|
| Rsquare                    | 0.120761 |
| Adj Rsquare                | -0.02578 |
| Root Mean Square Error     | 0.54494  |
| Mean of Response           | -6.2e-18 |
| Observations (or Sum Wgts) | 36       |

**Analysis of Variance**

| Source   | DF | Sum of Squares | Mean Square | F Ratio | Prob > F |
|----------|----|----------------|-------------|---------|----------|
| Label    | 5  | 1.223592       | 0.244718    | 0.8241  | 0.5425   |
| Error    | 30 | 8.908790       | 0.296960    |         |          |
| C. Total | 35 | 10.132382      |             |         |          |

**Means for Oneway Anova**

| Level   | Number | Mean     | Std Error | Lower 95% | Upper 95% |
|---------|--------|----------|-----------|-----------|-----------|
| 50nM-NA | 6      | -0.04204 | 0.22247   | -0.4964   | 0.41231   |
| 5nM-NA  | 6      | -0.14367 | 0.22247   | -0.5980   | 0.31068   |
| -NA     | 6      | 0.32448  | 0.22247   | -0.1299   | 0.77882   |
| 50nM+NA | 6      | 0.13080  | 0.22247   | -0.3235   | 0.58515   |
| 5nM+NA  | 6      | -0.02803 | 0.22247   | -0.4824   | 0.42632   |
| +NA     | 6      | -0.24155 | 0.22247   | -0.6959   | 0.21280   |

Std Error uses a pooled estimate of error variance

**Means Comparisons**

**Comparisons with a control using Dunnett's Method**

**Oneway Analysis of riboflavin By Label**

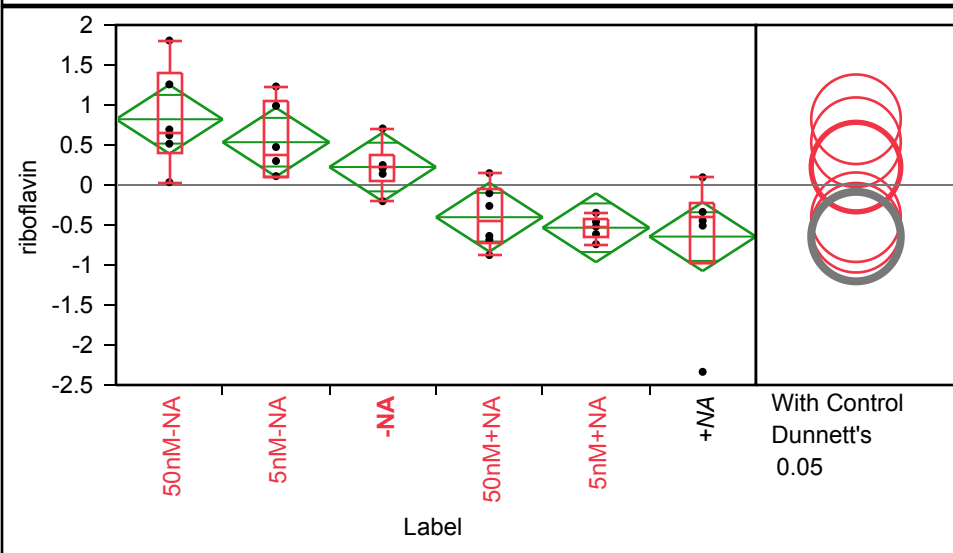

**Quantiles**

| Level   | Minimum  | 10%      | 25%      | Median   | 75%      | 90%      | Maximum  |
|---------|----------|----------|----------|----------|----------|----------|----------|
| 50nM-NA | 0.034846 | 0.034846 | 0.395916 | 0.658204 | 1.394677 | 1.805881 | 1.805881 |
| 5nM-NA  | 0.102644 | 0.102644 | 0.108737 | 0.38718  | 1.050787 | 1.231192 | 1.231192 |
| -NA     | -0.2027  | -0.2027  | 0.053623 | 0.226996 | 0.363773 | 0.706698 | 0.706698 |
| 50nM+NA | -0.8764  | -0.8764  | -0.73324 | -0.449   | -0.04042 | 0.14812  | 0.14812  |
| 5nM+NA  | -0.74059 | -0.74059 | -0.64577 | -0.52125 | -0.43049 | -0.34795 | -0.34795 |
| +NA     | -2.33557 | -2.33557 | -0.96492 | -0.39202 | -0.22897 | 0.096083 | 0.096083 |

**Oneway Anova**

**Summary of Fit**

|                            |          |
|----------------------------|----------|
| Rsquare                    | 0.584834 |
| Adj Rsquare                | 0.51564  |
| Root Mean Square Error     | 0.515918 |
| Mean of Response           | -5.6e-10 |
| Observations (or Sum Wgts) | 36       |

**Analysis of Variance**

| Source   | DF | Sum of Squares | Mean Square | F Ratio | Prob > F |
|----------|----|----------------|-------------|---------|----------|
| Label    | 5  | 11.248497      | 2.24970     | 8.4521  | <.0001 * |
| Error    | 30 | 7.985148       | 0.26617     |         |          |
| C. Total | 35 | 19.233645      |             |         |          |

**Means for Oneway Anova**

| Level   | Number | Mean     | Std Error | Lower 95% | Upper 95% |
|---------|--------|----------|-----------|-----------|-----------|
| 50nM-NA | 6      | 0.82184  | 0.21062   | 0.392     | 1.252     |
| 5nM-NA  | 6      | 0.53494  | 0.21062   | 0.105     | 0.965     |
| -NA     | 6      | 0.22442  | 0.21062   | -0.206    | 0.655     |
| 50nM+NA | 6      | -0.40251 | 0.21062   | -0.833    | 0.028     |
| 5nM+NA  | 6      | -0.53387 | 0.21062   | -0.964    | -0.104    |
| +NA     | 6      | -0.64481 | 0.21062   | -1.075    | -0.215    |

Std Error uses a pooled estimate of error variance

**Means Comparisons**

**Comparisons with a control using Dunnnett's Method**

**Oneway Analysis of ribose-phosphate By Label**

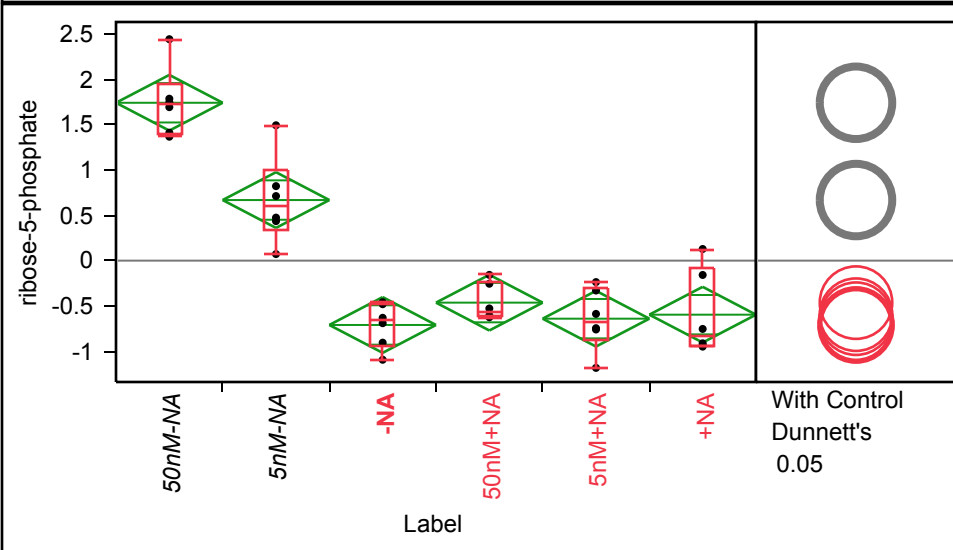

**Quantiles**

| Level   | Minimum  | 10%      | 25%      | Median   | 75%      | 90%      | Maximum  |
|---------|----------|----------|----------|----------|----------|----------|----------|
| 50nM-NA | 1.36752  | 1.36752  | 1.40041  | 1.721312 | 1.950903 | 2.443475 | 2.443475 |
| 5nM-NA  | 0.072426 | 0.072426 | 0.345189 | 0.593513 | 0.989963 | 1.493507 | 1.493507 |
| -NA     | -1.0937  | -1.0937  | -0.95236 | -0.66051 | -0.47543 | -0.45917 | -0.45917 |
| 50nM+NA | -0.62499 | -0.62499 | -0.61368 | -0.56685 | -0.23057 | -0.1572  | -0.1572  |
| 5nM+NA  | -1.18351 | -1.18351 | -0.8657  | -0.66669 | -0.30656 | -0.23687 | -0.23687 |
| +NA     | -0.94885 | -0.94885 | -0.93785 | -0.83299 | -0.08649 | 0.128355 | 0.128355 |

**Oneway Anova**

**Summary of Fit**

|                            |          |
|----------------------------|----------|
| Rsquare                    | 0.879611 |
| Adj Rsquare                | 0.859546 |
| Root Mean Square Error     | 0.368706 |
| Mean of Response           | -8.3e-10 |
| Observations (or Sum Wgts) | 36       |

**Analysis of Variance**

| Source   | DF | Sum of Squares | Mean Square | F Ratio | Prob > F |
|----------|----|----------------|-------------|---------|----------|
| Label    | 5  | 29.797804      | 5.95956     | 43.8384 | <.0001 * |
| Error    | 30 | 4.078317       | 0.13594     |         |          |
| C. Total | 35 | 33.876121      |             |         |          |

**Means for Oneway Anova**

| Level   | Number | Mean    | Std Error | Lower 95% | Upper 95% |
|---------|--------|---------|-----------|-----------|-----------|
| 50nM-NA | 6      | 1.7420  | 0.15052   | 1.435     | 2.049     |
| 5nM-NA  | 6      | 0.6685  | 0.15052   | 0.361     | 0.976     |
| -NA     | 6      | -0.7100 | 0.15052   | -1.017    | -0.403    |
| 50nM+NA | 6      | -0.4635 | 0.15052   | -0.771    | -0.156    |
| 5nM+NA  | 6      | -0.6406 | 0.15052   | -0.948    | -0.333    |
| +NA     | 6      | -0.5965 | 0.15052   | -0.904    | -0.289    |

Std Error uses a pooled estimate of error variance

**Means Comparisons**

**Comparisons with a control using Dunnett's Method**

**Oneway Analysis of S-adenosyl-L-homoCysteine By Label**

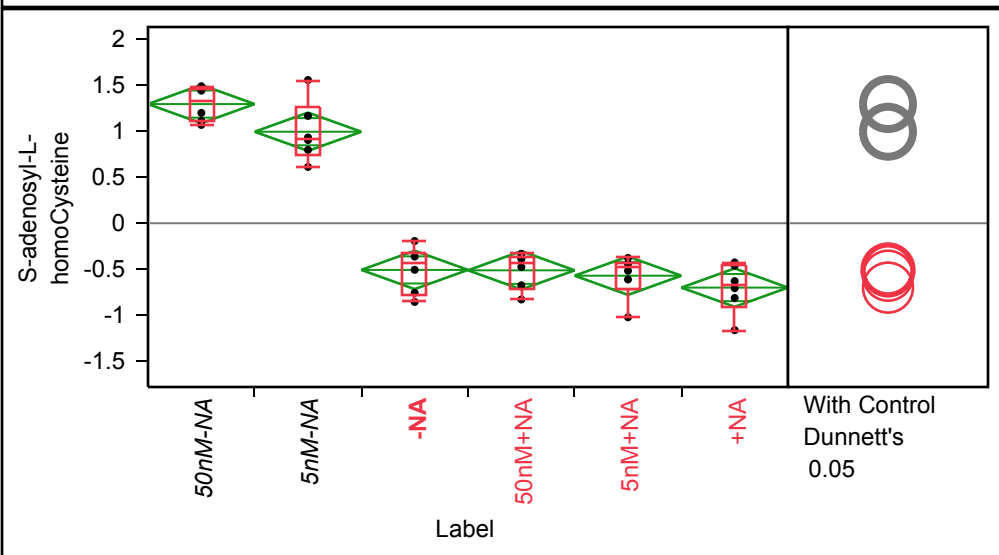

**Quantiles**

| Level   | Minimum  | 10%      | 25%      | Median   | 75%      | 90%      | Maximum  |
|---------|----------|----------|----------|----------|----------|----------|----------|
| 50nM-NA | 1.070199 | 1.070199 | 1.103128 | 1.3221   | 1.469721 | 1.491266 | 1.491266 |
| 5nM-NA  | 0.612681 | 0.612681 | 0.751524 | 0.919522 | 1.265497 | 1.558623 | 1.558623 |
| -NA     | -0.85658 | -0.85658 | -0.78267 | -0.43898 | -0.32084 | -0.19402 | -0.19402 |
| 50nM+NA | -0.83008 | -0.83008 | -0.71421 | -0.43272 | -0.36253 | -0.33273 | -0.33273 |
| 5nM+NA  | -1.02397 | -1.02397 | -0.7152  | -0.48397 | -0.42826 | -0.37836 | -0.37836 |
| +NA     | -1.16386 | -1.16386 | -0.90163 | -0.66874 | -0.45344 | -0.42699 | -0.42699 |

**Oneway Anova**

**Summary of Fit**

|                            |          |
|----------------------------|----------|
| Rsquare                    | 0.927399 |
| Adj Rsquare                | 0.915299 |
| Root Mean Square Error     | 0.250661 |
| Mean of Response           | -2.78e-9 |
| Observations (or Sum Wgts) | 36       |

**Analysis of Variance**

| Source   | DF | Sum of Squares | Mean Square | F Ratio | Prob > F |
|----------|----|----------------|-------------|---------|----------|
| Label    | 5  | 24.078048      | 4.81561     | 76.6439 | <.0001 * |
| Error    | 30 | 1.884928       | 0.06283     |         |          |
| C. Total | 35 | 25.962976      |             |         |          |

**Means for Oneway Anova**

| Level   | Number | Mean    | Std Error | Lower 95% | Upper 95% |
|---------|--------|---------|-----------|-----------|-----------|
| 50nM-NA | 6      | 1.2971  | 0.10233   | 1.088     | 1.506     |
| 5nM-NA  | 6      | 0.9960  | 0.10233   | 0.787     | 1.205     |
| -NA     | 6      | -0.5083 | 0.10233   | -0.717    | -0.299    |
| 50nM+NA | 6      | -0.5127 | 0.10233   | -0.722    | -0.304    |
| 5nM+NA  | 6      | -0.5712 | 0.10233   | -0.780    | -0.362    |
| +NA     | 6      | -0.7008 | 0.10233   | -0.910    | -0.492    |

Std Error uses a pooled estimate of error variance

**Means Comparisons**

**Comparisons with a control using Dunnett's Method**

**Oneway Analysis of S-adenosyl-L-methioninamine By Label**

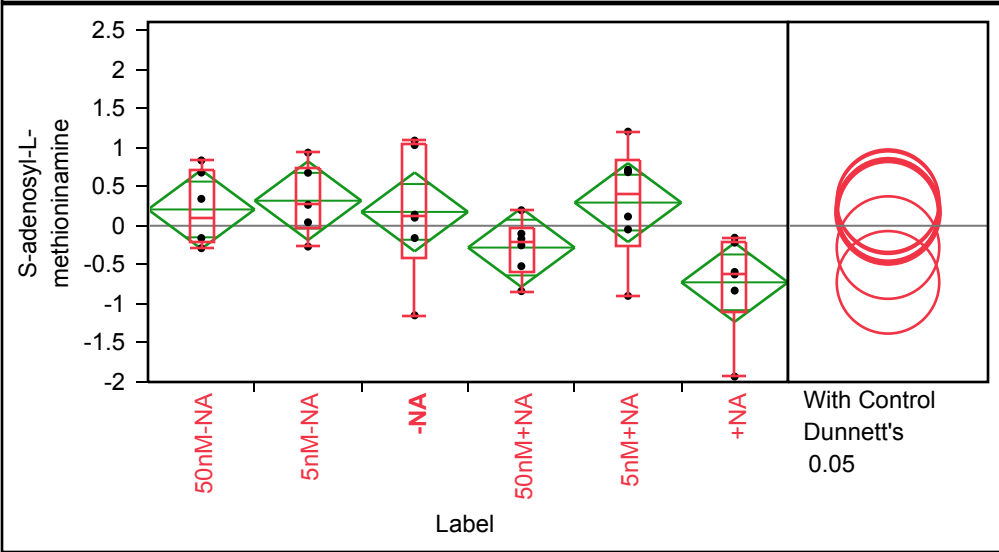

**Quantiles**

| Level   | Minimum  | 10%      | 25%      | Median   | 75%      | 90%      | Maximum  |
|---------|----------|----------|----------|----------|----------|----------|----------|
| 50nM-NA | -0.28761 | -0.28761 | -0.19509 | 0.093634 | 0.719483 | 0.836267 | 0.836267 |
| 5nM-NA  | -0.26679 | -0.26679 | -0.03362 | 0.266391 | 0.74263  | 0.935685 | 0.935685 |
| -NA     | -1.14681 | -1.14681 | -0.40474 | 0.12275  | 1.047096 | 1.090212 | 1.090212 |
| 50nM+NA | -0.8364  | -0.8364  | -0.59756 | -0.20946 | -0.02599 | 0.198594 | 0.198594 |
| 5nM+NA  | -0.8982  | -0.8982  | -0.26014 | 0.402003 | 0.83862  | 1.204845 | 1.204845 |
| +NA     | -1.93127 | -1.93127 | -1.10536 | -0.60692 | -0.20048 | -0.15344 | -0.15344 |

**Oneway Anova**

**Summary of Fit**

|                            |          |
|----------------------------|----------|
| Rsquare                    | 0.321833 |
| Adj Rsquare                | 0.208805 |
| Root Mean Square Error     | 0.604885 |
| Mean of Response           | -5.6e-10 |
| Observations (or Sum Wgts) | 36       |

**Analysis of Variance**

| Source   | DF | Sum of Squares | Mean Square | F Ratio | Prob > F |
|----------|----|----------------|-------------|---------|----------|
| Label    | 5  | 5.209078       | 1.04182     | 2.8474  | 0.0321 * |
| Error    | 30 | 10.976564      | 0.36589     |         |          |
| C. Total | 35 | 16.185642      |             |         |          |

**Means for Oneway Anova**

| Level   | Number | Mean     | Std Error | Lower 95% | Upper 95% |
|---------|--------|----------|-----------|-----------|-----------|
| 50nM-NA | 6      | 0.20871  | 0.24694   | -0.296    | 0.7130    |
| 5nM-NA  | 6      | 0.32068  | 0.24694   | -0.184    | 0.8250    |
| -NA     | 6      | 0.17737  | 0.24694   | -0.327    | 0.6817    |
| 50nM+NA | 6      | -0.27925 | 0.24694   | -0.784    | 0.2251    |
| 5nM+NA  | 6      | 0.29662  | 0.24694   | -0.208    | 0.8009    |
| +NA     | 6      | -0.72413 | 0.24694   | -1.228    | -0.2198   |

Std Error uses a pooled estimate of error variance

**Means Comparisons**

**Comparisons with a control using Dunnnett's Method**



**Oneway Analysis of SAM By Label**

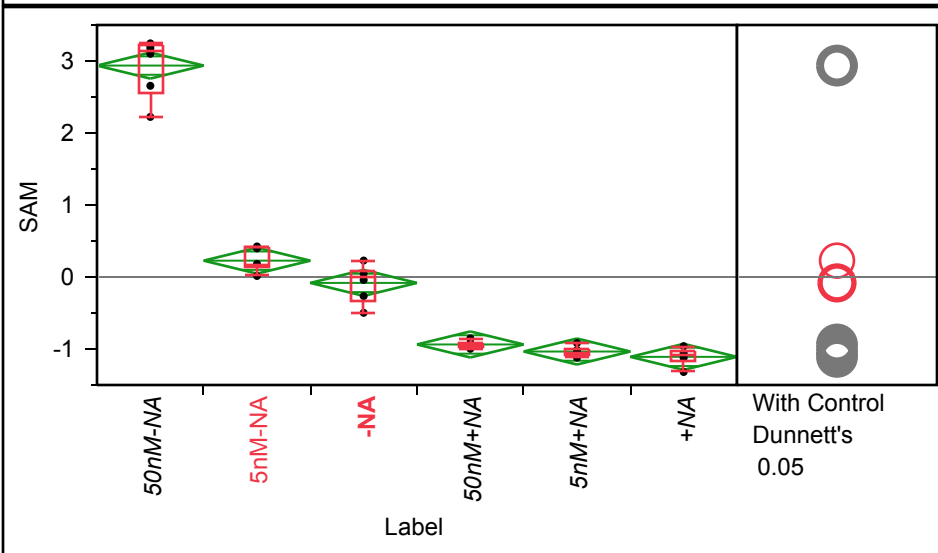

**Quantiles**

| Level   | Minimum  | 10%      | 25%      | Median   | 75%      | 90%      | Maximum  |
|---------|----------|----------|----------|----------|----------|----------|----------|
| 50nM-NA | 2.223299 | 2.223299 | 2.54751  | 3.139784 | 3.222923 | 3.244946 | 3.244946 |
| 5nM-NA  | 0.014577 | 0.014577 | 0.131006 | 0.177963 | 0.40405  | 0.423854 | 0.423854 |
| -NA     | -0.49723 | -0.49723 | -0.3231  | -0.00298 | 0.092695 | 0.228431 | 0.228431 |
| 50nM+NA | -0.99678 | -0.99678 | -0.96657 | -0.94732 | -0.90473 | -0.8524  | -0.8524  |
| 5nM+NA  | -1.12004 | -1.12004 | -1.08616 | -1.042   | -0.98991 | -0.91751 | -0.91751 |
| +NA     | -1.31933 | -1.31933 | -1.17713 | -1.09477 | -1.03249 | -0.96003 | -0.96003 |

**Oneway Anova**

**Summary of Fit**

|                            |          |
|----------------------------|----------|
| Rsquare                    | 0.980593 |
| Adj Rsquare                | 0.977359 |
| Root Mean Square Error     | 0.216674 |
| Mean of Response           | 5.56e-10 |
| Observations (or Sum Wgts) | 36       |

**Analysis of Variance**

| Source   | DF | Sum of Squares | Mean Square | F Ratio  | Prob > F |
|----------|----|----------------|-------------|----------|----------|
| Label    | 5  | 71.166602      | 14.2333     | 303.1743 | <.0001 * |
| Error    | 30 | 1.408429       | 0.0469      |          |          |
| C. Total | 35 | 72.575032      |             |          |          |

**Means for Oneway Anova**

| Level   | Number | Mean    | Std Error | Lower 95% | Upper 95% |
|---------|--------|---------|-----------|-----------|-----------|
| 50nM-NA | 6      | 2.9365  | 0.08846   | 2.756     | 3.117     |
| 5nM-NA  | 6      | 0.2269  | 0.08846   | 0.046     | 0.408     |
| -NA     | 6      | -0.0821 | 0.08846   | -0.263    | 0.099     |
| 50nM+NA | 6      | -0.9371 | 0.08846   | -1.118    | -0.756    |
| 5nM+NA  | 6      | -1.0351 | 0.08846   | -1.216    | -0.854    |
| +NA     | 6      | -1.1092 | 0.08846   | -1.290    | -0.929    |

Std Error uses a pooled estimate of error variance

**Means Comparisons**

**Comparisons with a control using Dunnett's Method**

**Oneway Analysis of sarcosine By Label**

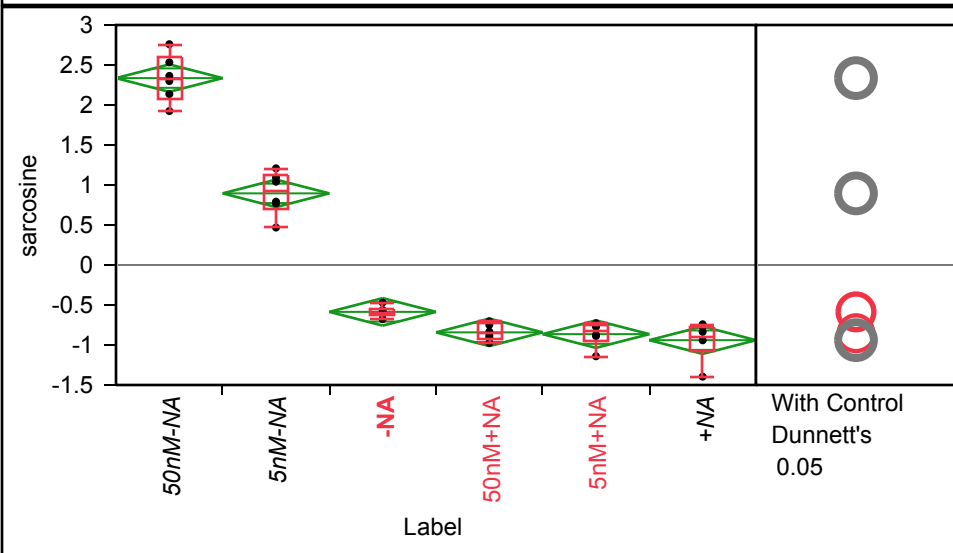

**Quantiles**

| Level   | Minimum  | 10%      | 25%      | Median   | 75%      | 90%      | Maximum  |
|---------|----------|----------|----------|----------|----------|----------|----------|
| 50nM-NA | 1.923935 | 1.923935 | 2.083438 | 2.33157  | 2.589684 | 2.759978 | 2.759978 |
| 5nM-NA  | 0.468202 | 0.468202 | 0.693978 | 0.916151 | 1.123111 | 1.208169 | 1.208169 |
| -NA     | -0.67743 | -0.67743 | -0.629   | -0.59586 | -0.53966 | -0.4709  | -0.4709  |
| 50nM+NA | -0.97384 | -0.97384 | -0.92782 | -0.85742 | -0.73657 | -0.70321 | -0.70321 |
| 5nM+NA  | -1.14095 | -1.14095 | -0.951   | -0.82779 | -0.76161 | -0.72753 | -0.72753 |
| +NA     | -1.3959  | -1.3959  | -1.06364 | -0.88853 | -0.76279 | -0.74112 | -0.74112 |

**Oneway Anova**

**Summary of Fit**

|                            |          |
|----------------------------|----------|
| Rsquare                    | 0.976846 |
| Adj Rsquare                | 0.972987 |
| Root Mean Square Error     | 0.205874 |
| Mean of Response           | 1.111e-8 |
| Observations (or Sum Wgts) | 36       |

**Analysis of Variance**

| Source   | DF | Sum of Squares | Mean Square | F Ratio  | Prob > F |
|----------|----|----------------|-------------|----------|----------|
| Label    | 5  | 53.644813      | 10.7290     | 253.1363 | <.0001 * |
| Error    | 30 | 1.271524       | 0.0424      |          |          |
| C. Total | 35 | 54.916337      |             |          |          |

**Means for Oneway Anova**

| Level   | Number | Mean    | Std Error | Lower 95% | Upper 95% |
|---------|--------|---------|-----------|-----------|-----------|
| 50nM-NA | 6      | 2.3361  | 0.08405   | 2.164     | 2.508     |
| 5nM-NA  | 6      | 0.8954  | 0.08405   | 0.724     | 1.067     |
| -NA     | 6      | -0.5859 | 0.08405   | -0.758    | -0.414    |
| 50nM+NA | 6      | -0.8420 | 0.08405   | -1.014    | -0.670    |
| 5nM+NA  | 6      | -0.8641 | 0.08405   | -1.036    | -0.692    |
| +NA     | 6      | -0.9395 | 0.08405   | -1.111    | -0.768    |

Std Error uses a pooled estimate of error variance

**Means Comparisons**

**Comparisons with a control using Dunnett's Method**

**Oneway Analysis of Sedoheptulose 7-phosphate By Label**

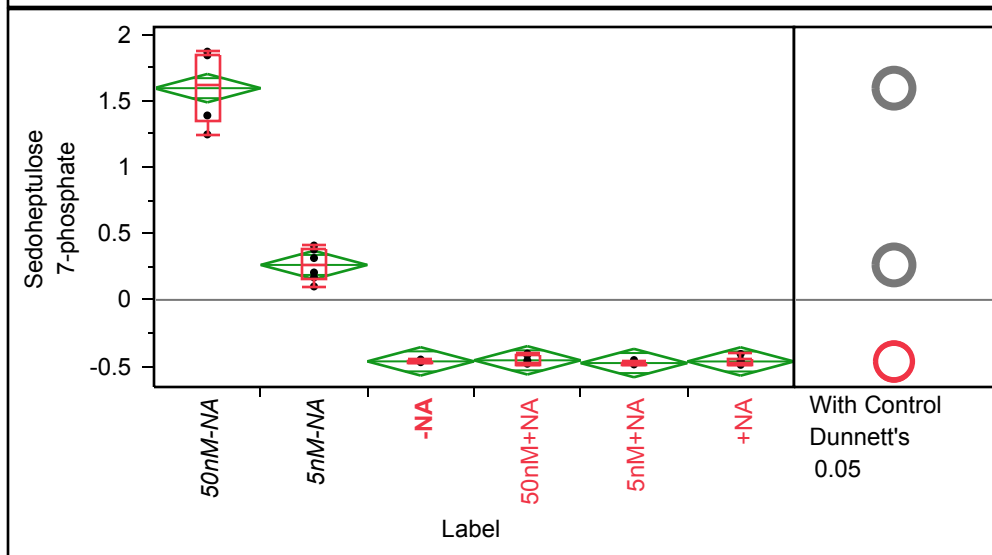

**Quantiles**

| Level   | Minimum  | 10%      | 25%      | Median   | 75%      | 90%      | Maximum  |
|---------|----------|----------|----------|----------|----------|----------|----------|
| 50nM-NA | 1.246295 | 1.246295 | 1.350099 | 1.612653 | 1.849228 | 1.869874 | 1.869874 |
| 5nM-NA  | 0.101108 | 0.101108 | 0.151945 | 0.260713 | 0.386592 | 0.409338 | 0.409338 |
| -NA     | -0.4741  | -0.4741  | -0.47045 | -0.4635  | -0.45664 | -0.44963 | -0.44963 |
| 50nM+NA | -0.4885  | -0.4885  | -0.48504 | -0.46917 | -0.41308 | -0.40467 | -0.40467 |
| 5nM+NA  | -0.49056 | -0.49056 | -0.48729 | -0.47592 | -0.46823 | -0.45339 | -0.45339 |
| +NA     | -0.48964 | -0.48964 | -0.48933 | -0.47121 | -0.44251 | -0.40742 | -0.40742 |

**Oneway Anova**

**Summary of Fit**

|                            |          |
|----------------------------|----------|
| Rsquare                    | 0.976969 |
| Adj Rsquare                | 0.97313  |
| Root Mean Square Error     | 0.128017 |
| Mean of Response           | 8.333e-9 |
| Observations (or Sum Wgts) | 36       |

**Analysis of Variance**

| Source   | DF | Sum of Squares | Mean Square | F Ratio  | Prob > F |
|----------|----|----------------|-------------|----------|----------|
| Label    | 5  | 20.855198      | 4.17104     | 254.5134 | <.0001 * |
| Error    | 30 | 0.491649       | 0.01639     |          |          |
| C. Total | 35 | 21.346847      |             |          |          |

**Means for Oneway Anova**

| Level   | Number | Mean    | Std Error | Lower 95% | Upper 95% |
|---------|--------|---------|-----------|-----------|-----------|
| 50nM-NA | 6      | 1.5948  | 0.05226   | 1.488     | 1.701     |
| 5nM-NA  | 6      | 0.2633  | 0.05226   | 0.157     | 0.370     |
| -NA     | 6      | -0.4632 | 0.05226   | -0.570    | -0.356    |
| 50nM+NA | 6      | -0.4552 | 0.05226   | -0.562    | -0.348    |
| 5nM+NA  | 6      | -0.4759 | 0.05226   | -0.583    | -0.369    |
| +NA     | 6      | -0.4638 | 0.05226   | -0.571    | -0.357    |

Std Error uses a pooled estimate of error variance

**Means Comparisons**

**Comparisons with a control using Dunnnett's Method**

**Oneway Analysis of serine By Label**

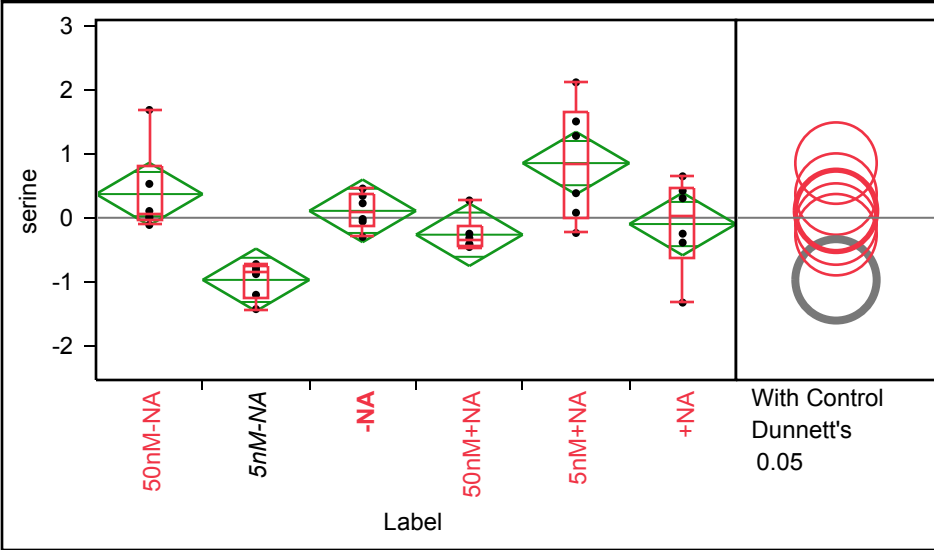

**Quantiles**

| Level   | Minimum  | 10%      | 25%      | Median   | 75%      | 90%      | Maximum  |
|---------|----------|----------|----------|----------|----------|----------|----------|
| 50nM-NA | -0.1128  | -0.1128  | -0.03148 | 0.062426 | 0.82075  | 1.689653 | 1.689653 |
| 5nM-NA  | -1.43194 | -1.43194 | -1.26361 | -0.85049 | -0.7625  | -0.72634 | -0.72634 |
| -NA     | -0.3003  | -0.3003  | -0.11871 | 0.10402  | 0.372148 | 0.458249 | 0.458249 |
| 50nM+NA | -0.45886 | -0.45886 | -0.4355  | -0.36322 | -0.11894 | 0.271565 | 0.271565 |
| 5nM+NA  | -0.23819 | -0.23819 | -0.00032 | 0.83422  | 1.662908 | 2.122642 | 2.122642 |
| +NA     | -1.32978 | -1.32978 | -0.62418 | 0.028276 | 0.479647 | 0.64999  | 0.64999  |

**Oneway Anova**

**Summary of Fit**

|                            |          |
|----------------------------|----------|
| Rsquare                    | 0.525293 |
| Adj Rsquare                | 0.446175 |
| Root Mean Square Error     | 0.58782  |
| Mean of Response           | 5.56e-11 |
| Observations (or Sum Wgts) | 36       |

**Analysis of Variance**

| Source   | DF | Sum of Squares | Mean Square | F Ratio | Prob > F |
|----------|----|----------------|-------------|---------|----------|
| Label    | 5  | 11.470604      | 2.29412     | 6.6394  | 0.0003 * |
| Error    | 30 | 10.365968      | 0.34553     |         |          |
| C. Total | 35 | 21.836572      |             |         |          |

**Means for Oneway Anova**

| Level   | Number | Mean     | Std Error | Lower 95% | Upper 95% |
|---------|--------|----------|-----------|-----------|-----------|
| 50nM-NA | 6      | 0.37141  | 0.23998   | -0.119    | 0.862     |
| 5nM-NA  | 6      | -0.97355 | 0.23998   | -1.464    | -0.483    |
| -NA     | 6      | 0.10854  | 0.23998   | -0.382    | 0.599     |
| 50nM+NA | 6      | -0.26509 | 0.23998   | -0.755    | 0.225     |
| 5nM+NA  | 6      | 0.85692  | 0.23998   | 0.367     | 1.347     |
| +NA     | 6      | -0.09822 | 0.23998   | -0.588    | 0.392     |

Std Error uses a pooled estimate of error variance

**Means Comparisons**

**Comparisons with a control using Dunnett's Method**

**Oneway Analysis of S-methyl-5-thioadenosine By Label**

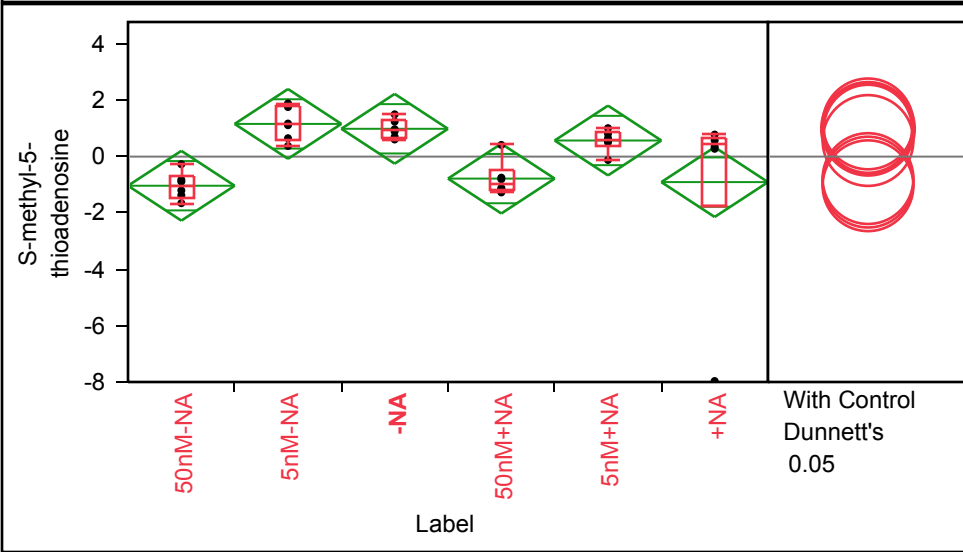

**Quantiles**

| Level   | Minimum  | 10%      | 25%      | Median   | 75%      | 90%      | Maximum  |
|---------|----------|----------|----------|----------|----------|----------|----------|
| 50nM-NA | -1.65321 | -1.65321 | -1.44206 | -1.04289 | -0.6847  | -0.2709  | -0.2709  |
| 5nM-NA  | 0.376373 | 0.376373 | 0.583673 | 1.144161 | 1.790213 | 1.886227 | 1.886227 |
| -NA     | 0.608475 | 0.608475 | 0.680015 | 0.933656 | 1.307273 | 1.500063 | 1.500063 |
| 50nM+NA | -1.27072 | -1.27072 | -1.18846 | -0.95774 | -0.45745 | 0.413944 | 0.413944 |
| 5nM+NA  | -0.11954 | -0.11954 | 0.352292 | 0.607012 | 0.86402  | 1.00958  | 1.00958  |
| +NA     | -7.96591 | -7.96591 | -1.78295 | 0.450921 | 0.627676 | 0.781192 | 0.781192 |

**Oneway Anova**

**Summary of Fit**

|                            |          |
|----------------------------|----------|
| Rsquare                    | 0.318141 |
| Adj Rsquare                | 0.204498 |
| Root Mean Square Error     | 1.484897 |
| Mean of Response           | 2.47e-17 |
| Observations (or Sum Wgts) | 36       |

**Analysis of Variance**

| Source   | DF | Sum of Squares | Mean Square | F Ratio | Prob > F |
|----------|----|----------------|-------------|---------|----------|
| Label    | 5  | 30.863072      | 6.17261     | 2.7995  | 0.0343 * |
| Error    | 30 | 66.147597      | 2.20492     |         |          |
| C. Total | 35 | 97.010669      |             |         |          |

**Means for Oneway Anova**

| Level   | Number | Mean    | Std Error | Lower 95% | Upper 95% |
|---------|--------|---------|-----------|-----------|-----------|
| 50nM-NA | 6      | -1.0340 | 0.60621   | -2.272    | 0.2040    |
| 5nM-NA  | 6      | 1.1603  | 0.60621   | -0.078    | 2.3984    |
| -NA     | 6      | 0.9871  | 0.60621   | -0.251    | 2.2252    |
| 50nM+NA | 6      | -0.7802 | 0.60621   | -2.018    | 0.4578    |
| 5nM+NA  | 6      | 0.5715  | 0.60621   | -0.667    | 1.8096    |
| +NA     | 6      | -0.9047 | 0.60621   | -2.143    | 0.3333    |

Std Error uses a pooled estimate of error variance

**Means Comparisons**

**Comparisons with a control using Dunnett's Method**

**Oneway Analysis of sn-glycerol-3-phosphate By Label**

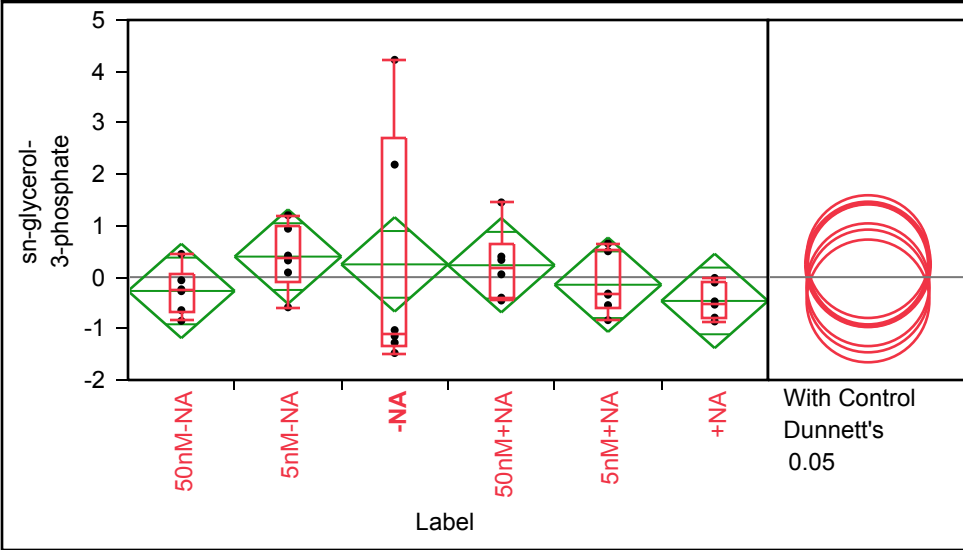

**Quantiles**

| Level   | Minimum  | 10%      | 25%      | Median   | 75%      | 90%      | Maximum  |
|---------|----------|----------|----------|----------|----------|----------|----------|
| 50nM-NA | -0.84933 | -0.84933 | -0.69428 | -0.25504 | 0.067408 | 0.450624 | 0.450624 |
| 5nM-NA  | -0.58666 | -0.58666 | -0.07868 | 0.372488 | 1.007551 | 1.204524 | 1.204524 |
| -NA     | -1.47565 | -1.47565 | -1.32362 | -1.08765 | 2.697419 | 4.225186 | 4.225186 |
| 50nM+NA | -0.45447 | -0.45447 | -0.41285 | 0.19449  | 0.663132 | 1.453019 | 1.453019 |
| 5nM+NA  | -0.83587 | -0.83587 | -0.61737 | -0.33108 | 0.540809 | 0.653015 | 0.653015 |
| +NA     | -0.86134 | -0.86134 | -0.80601 | -0.50291 | -0.08262 | -0.01575 | -0.01575 |

**Oneway Anova**

**Summary of Fit**

|                            |          |
|----------------------------|----------|
| Rsquare                    | 0.087851 |
| Adj Rsquare                | -0.06417 |
| Root Mean Square Error     | 1.09981  |
| Mean of Response           | 0        |
| Observations (or Sum Wgts) | 36       |

**Analysis of Variance**

| Source   | DF | Sum of Squares | Mean Square | F Ratio | Prob > F |
|----------|----|----------------|-------------|---------|----------|
| Label    | 5  | 3.494932       | 0.69899     | 0.5779  | 0.7165   |
| Error    | 30 | 36.287458      | 1.20958     |         |          |
| C. Total | 35 | 39.782390      |             |         |          |

**Means for Oneway Anova**

| Level   | Number | Mean     | Std Error | Lower 95% | Upper 95% |
|---------|--------|----------|-----------|-----------|-----------|
| 50nM-NA | 6      | -0.26862 | 0.44900   | -1.186    | 0.6484    |
| 5nM-NA  | 6      | 0.39923  | 0.44900   | -0.518    | 1.3162    |
| -NA     | 6      | 0.24824  | 0.44900   | -0.669    | 1.1652    |
| 50nM+NA | 6      | 0.23140  | 0.44900   | -0.686    | 1.1484    |
| 5nM+NA  | 6      | -0.14769 | 0.44900   | -1.065    | 0.7693    |
| +NA     | 6      | -0.46256 | 0.44900   | -1.380    | 0.4544    |

Std Error uses a pooled estimate of error variance

**Means Comparisons**

**Comparisons with a control using Dunnett's Method**

**Oneway Analysis of Spermidine By Label**

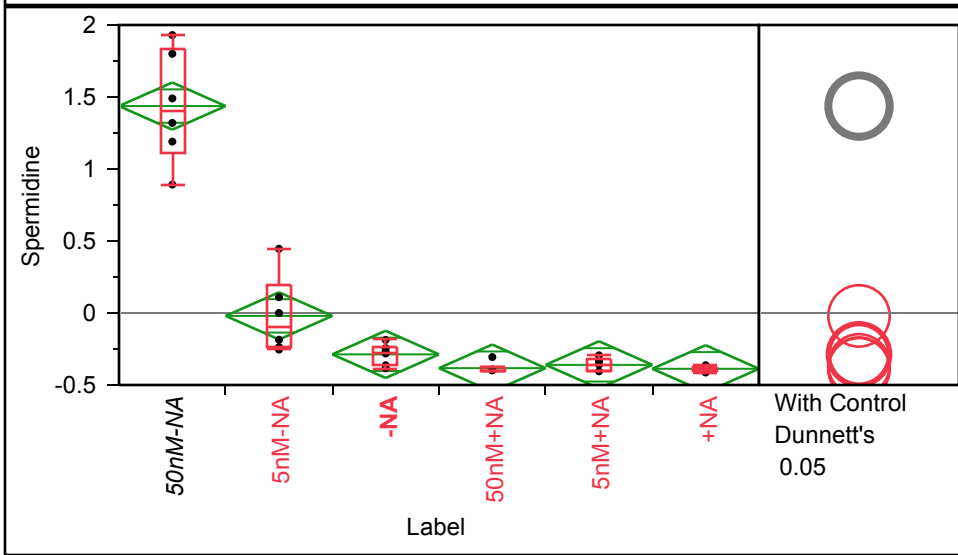

**Quantiles**

| Level   | Minimum | 10%    | 25%      | Median   | 75%      | 90%    | Maximum |
|---------|---------|--------|----------|----------|----------|--------|---------|
| 50nM-NA | 0.892   | 0.892  | 1.1155   | 1.405    | 1.8325   | 1.93   | 1.93    |
| 5nM-NA  | -0.254  | -0.254 | -0.24125 | -0.09298 | 0.194    | 0.446  | 0.446   |
| -NA     | -0.383  | -0.383 | -0.368   | -0.2735  | -0.22975 | -0.187 | -0.187  |
| 50nM+NA | -0.405  | -0.405 | -0.40425 | -0.396   | -0.36975 | -0.306 | -0.306  |
| 5nM+NA  | -0.406  | -0.406 | -0.40525 | -0.3605  | -0.32475 | -0.294 | -0.294  |
| +NA     | -0.413  | -0.413 | -0.40475 | -0.387   | -0.36975 | -0.363 | -0.363  |

**Oneway Anova**

**Summary of Fit**

|                            |          |
|----------------------------|----------|
| Rsquare                    | 0.93022  |
| Adj Rsquare                | 0.918589 |
| Root Mean Square Error     | 0.196528 |
| Mean of Response           | -0.00017 |
| Observations (or Sum Wgts) | 36       |

**Analysis of Variance**

| Source   | DF | Sum of Squares | Mean Square | F Ratio | Prob > F |
|----------|----|----------------|-------------|---------|----------|
| Label    | 5  | 15.446231      | 3.08925     | 79.9839 | <.0001 * |
| Error    | 30 | 1.158700       | 0.03862     |         |          |
| C. Total | 35 | 16.604931      |             |         |          |

**Means for Oneway Anova**

| Level   | Number | Mean    | Std Error | Lower 95% | Upper 95% |
|---------|--------|---------|-----------|-----------|-----------|
| 50nM-NA | 6      | 1.4370  | 0.08023   | 1.273     | 1.601     |
| 5nM-NA  | 6      | -0.0202 | 0.08023   | -0.184    | 0.144     |
| -NA     | 6      | -0.2873 | 0.08023   | -0.451    | -0.123    |
| 50nM+NA | 6      | -0.3830 | 0.08023   | -0.547    | -0.219    |
| 5nM+NA  | 6      | -0.3602 | 0.08023   | -0.524    | -0.196    |
| +NA     | 6      | -0.3873 | 0.08023   | -0.551    | -0.223    |

Std Error uses a pooled estimate of error variance

**Means Comparisons**

**Comparisons with a control using Dunnnett's Method**

**Oneway Analysis of Spermine By Label**

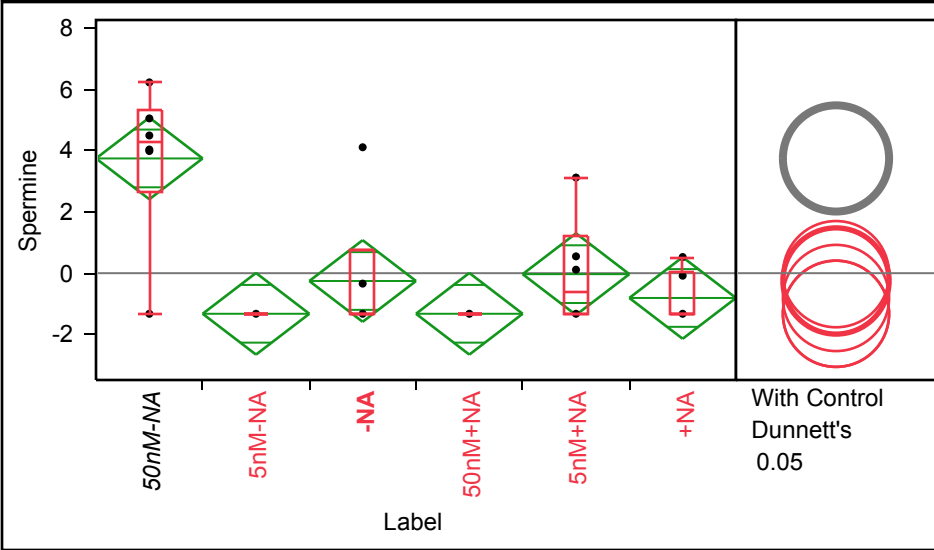

**Quantiles**

| Level   | Minimum  | 10%      | 25%      | Median   | 75%      | 90%      | Maximum  |
|---------|----------|----------|----------|----------|----------|----------|----------|
| 50nM-NA | -1.32251 | -1.32251 | 2.654467 | 4.257795 | 5.336943 | 6.216519 | 6.216519 |
| 5nM-NA  | -1.32251 | -1.32251 | -1.32251 | -1.3225  | -1.3225  | -1.3225  | -1.3225  |
| -NA     | -1.32251 | -1.32251 | -1.32251 | -1.32251 | 0.770728 | 4.102761 | 4.102761 |
| 50nM+NA | -1.32252 | -1.32252 | -1.32252 | -1.32252 | -1.32252 | -1.32251 | -1.32251 |
| 5nM+NA  | -1.32252 | -1.32252 | -1.32251 | -0.60454 | 1.190142 | 3.116174 | 3.116174 |
| +NA     | -1.32254 | -1.32254 | -1.32252 | -1.32252 | 0.069881 | 0.525947 | 0.525947 |

**Oneway Anova**

**Summary of Fit**

|                            |          |
|----------------------------|----------|
| Rsquare                    | 0.588476 |
| Adj Rsquare                | 0.519889 |
| Root Mean Square Error     | 1.595264 |
| Mean of Response           | -5.6e-10 |
| Observations (or Sum Wgts) | 36       |

**Analysis of Variance**

| Source   | DF | Sum of Squares | Mean Square | F Ratio | Prob > F |
|----------|----|----------------|-------------|---------|----------|
| Label    | 5  | 109.17444      | 21.8349     | 8.5800  | <.0001 * |
| Error    | 30 | 76.34604       | 2.5449      |         |          |
| C. Total | 35 | 185.52048      |             |         |          |

**Means for Oneway Anova**

| Level   | Number | Mean    | Std Error | Lower 95% | Upper 95% |
|---------|--------|---------|-----------|-----------|-----------|
| 50nM-NA | 6      | 3.7389  | 0.65126   | 2.409     | 5.0690    |
| 5nM-NA  | 6      | -1.3225 | 0.65126   | -2.653    | 0.0076    |
| -NA     | 6      | -0.2545 | 0.65126   | -1.585    | 1.0755    |
| 50nM+NA | 6      | -1.3225 | 0.65126   | -2.653    | 0.0075    |
| 5nM+NA  | 6      | -0.0316 | 0.65126   | -1.362    | 1.2984    |
| +NA     | 6      | -0.8077 | 0.65126   | -2.138    | 0.5223    |

Std Error uses a pooled estimate of error variance

**Means Comparisons**

**Comparisons with a control using Dunnnett's Method**



**Oneway Analysis of Stearic acid By Label**

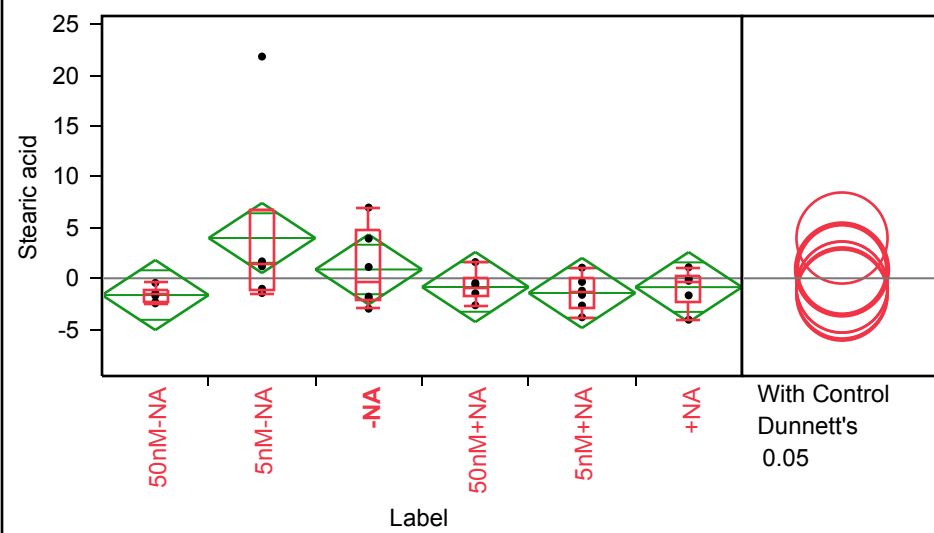

**Quantiles**

| Level   | Minimum  | 10%      | 25%      | Median   | 75%      | 90%      | Maximum  |
|---------|----------|----------|----------|----------|----------|----------|----------|
| 50nM-NA | -2.46954 | -2.46954 | -2.36871 | -1.59973 | -1.20328 | -0.45499 | -0.45499 |
| 5nM-NA  | -1.4541  | -1.4541  | -1.13909 | 1.386842 | 6.70778  | 21.83766 | 21.83766 |
| -NA     | -2.99742 | -2.99742 | -2.22811 | -0.34764 | 4.669731 | 6.96455  | 6.96455  |
| 50nM+NA | -2.65753 | -2.65753 | -1.81392 | -1.05068 | 0.05499  | 1.594102 | 1.594102 |
| 5nM+NA  | -3.84018 | -3.84018 | -2.97583 | -1.4259  | -0.00446 | 1.046058 | 1.046058 |
| +NA     | -4.08126 | -4.08126 | -2.28217 | -0.2684  | 0.255786 | 1.083752 | 1.083752 |

**Oneway Anova**

**Summary of Fit**

|                            |          |
|----------------------------|----------|
| Rsquare                    | 0.210501 |
| Adj Rsquare                | 0.078918 |
| Root Mean Square Error     | 4.135223 |
| Mean of Response           | -2.8e-10 |
| Observations (or Sum Wgts) | 36       |

**Analysis of Variance**

| Source   | DF | Sum of Squares | Mean Square | F Ratio | Prob > F |
|----------|----|----------------|-------------|---------|----------|
| Label    | 5  | 136.77992      | 27.3560     | 1.5998  | 0.1905   |
| Error    | 30 | 513.00208      | 17.1001     |         |          |
| C. Total | 35 | 649.78200      |             |         |          |

**Means for Oneway Anova**

| Level   | Number | Mean    | Std Error | Lower 95% | Upper 95% |
|---------|--------|---------|-----------|-----------|-----------|
| 50nM-NA | 6      | -1.6520 | 1.6882    | -5.100    | 1.7958    |
| 5nM-NA  | 6      | 3.9646  | 1.6882    | 0.517     | 7.4124    |
| -NA     | 6      | 0.8675  | 1.6882    | -2.580    | 4.3153    |
| 50nM+NA | 6      | -0.8593 | 1.6882    | -4.307    | 2.5885    |
| 5nM+NA  | 6      | -1.4480 | 1.6882    | -4.896    | 1.9997    |
| +NA     | 6      | -0.8728 | 1.6882    | -4.321    | 2.5749    |

Std Error uses a pooled estimate of error variance

**Means Comparisons**

**Comparisons with a control using Dunnnett's Method**

**Oneway Analysis of succinate By Label**

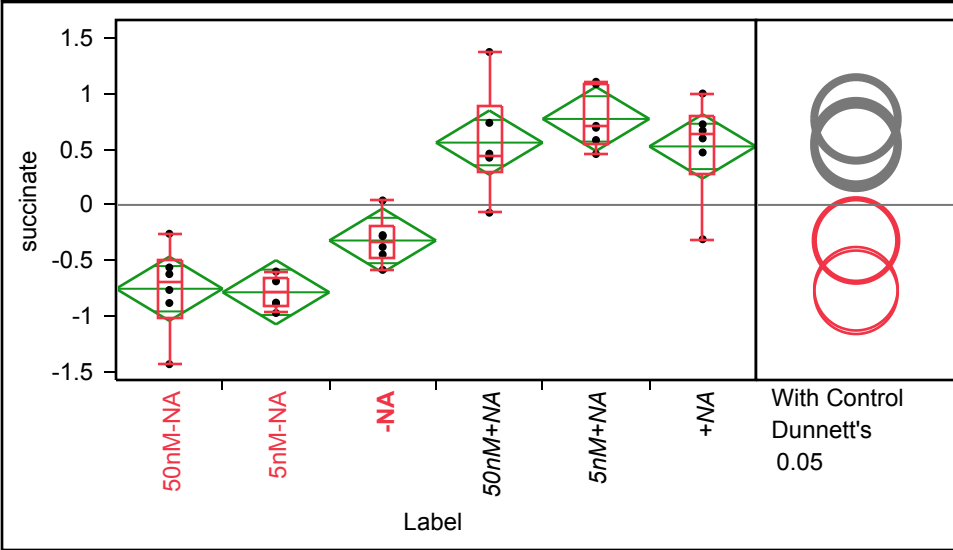

**Quantiles**

| Level   | Minimum  | 10%      | 25%      | Median   | 75%      | 90%      | Maximum  |
|---------|----------|----------|----------|----------|----------|----------|----------|
| 50nM-NA | -1.43791 | -1.43791 | -1.02373 | -0.69613 | -0.48861 | -0.26051 | -0.26051 |
| 5nM-NA  | -0.97568 | -0.97568 | -0.91276 | -0.78723 | -0.66743 | -0.60105 | -0.60105 |
| -NA     | -0.58622 | -0.58622 | -0.48188 | -0.33113 | -0.19434 | 0.040451 | 0.040451 |
| 50nM+NA | -0.07029 | -0.07029 | 0.302051 | 0.448925 | 0.900714 | 1.380463 | 1.380463 |
| 5nM+NA  | 0.459265 | 0.459265 | 0.55407  | 0.705224 | 1.095965 | 1.111752 | 1.111752 |
| +NA     | -0.31004 | -0.31004 | 0.27755  | 0.635607 | 0.797505 | 1.005749 | 1.005749 |

**Oneway Anova**

**Summary of Fit**

|                            |          |
|----------------------------|----------|
| Rsquare                    | 0.80543  |
| Adj Rsquare                | 0.773002 |
| Root Mean Square Error     | 0.34727  |
| Mean of Response           | -2.8e-10 |
| Observations (or Sum Wgts) | 36       |

**Analysis of Variance**

| Source   | DF | Sum of Squares | Mean Square | F Ratio | Prob > F |
|----------|----|----------------|-------------|---------|----------|
| Label    | 5  | 14.976412      | 2.99528     | 24.8373 | <.0001 * |
| Error    | 30 | 3.617887       | 0.12060     |         |          |
| C. Total | 35 | 18.594299      |             |         |          |

**Means for Oneway Anova**

| Level   | Number | Mean     | Std Error | Lower 95% | Upper 95% |
|---------|--------|----------|-----------|-----------|-----------|
| 50nM-NA | 6      | -0.75683 | 0.14177   | -1.046    | -0.467    |
| 5nM-NA  | 6      | -0.78876 | 0.14177   | -1.078    | -0.499    |
| -NA     | 6      | -0.32129 | 0.14177   | -0.611    | -0.032    |
| 50nM+NA | 6      | 0.56250  | 0.14177   | 0.273     | 0.852     |
| 5nM+NA  | 6      | 0.77631  | 0.14177   | 0.487     | 1.066     |
| +NA     | 6      | 0.52807  | 0.14177   | 0.239     | 0.818     |

Std Error uses a pooled estimate of error variance

**Means Comparisons**

**Comparisons with a control using Dunnett's Method**

**Oneway Analysis of taurine By Label**

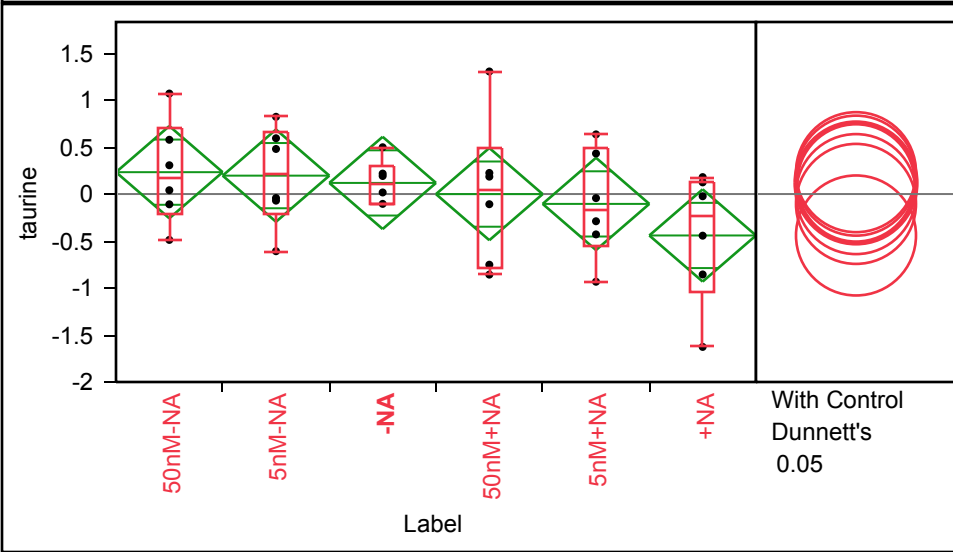

**Quantiles**

| Level   | Minimum  | 10%      | 25%      | Median   | 75%      | 90%      | Maximum  |
|---------|----------|----------|----------|----------|----------|----------|----------|
| 50nM-NA | -0.4881  | -0.4881  | -0.20402 | 0.173288 | 0.70032  | 1.069158 | 1.069158 |
| 5nM-NA  | -0.60823 | -0.60823 | -0.20472 | 0.218647 | 0.650642 | 0.821713 | 0.821713 |
| -NA     | -0.10991 | -0.10991 | -0.10606 | 0.104354 | 0.287704 | 0.4978   | 0.4978   |
| 50nM+NA | -0.85736 | -0.85736 | -0.77834 | 0.038308 | 0.494284 | 1.303971 | 1.303971 |
| 5nM+NA  | -0.93313 | -0.93313 | -0.55544 | -0.16651 | 0.482074 | 0.634638 | 0.634638 |
| +NA     | -1.62673 | -1.62673 | -1.04864 | -0.23336 | 0.138176 | 0.180028 | 0.180028 |

**Oneway Anova**

**Summary of Fit**

|                            |          |
|----------------------------|----------|
| Rsquare                    | 0.15255  |
| Adj Rsquare                | 0.011308 |
| Root Mean Square Error     | 0.588546 |
| Mean of Response           | 2.78e-10 |
| Observations (or Sum Wgts) | 36       |

**Analysis of Variance**

| Source   | DF | Sum of Squares | Mean Square | F Ratio | Prob > F |
|----------|----|----------------|-------------|---------|----------|
| Label    | 5  | 1.870590       | 0.374118    | 1.0801  | 0.3913   |
| Error    | 30 | 10.391586      | 0.346386    |         |          |
| C. Total | 35 | 12.262176      |             |         |          |

**Means for Oneway Anova**

| Level   | Number | Mean     | Std Error | Lower 95% | Upper 95% |
|---------|--------|----------|-----------|-----------|-----------|
| 50nM-NA | 6      | 0.23261  | 0.24027   | -0.2581   | 0.72332   |
| 5nM-NA  | 6      | 0.19570  | 0.24027   | -0.2950   | 0.68640   |
| -NA     | 6      | 0.11825  | 0.24027   | -0.3725   | 0.60895   |
| 50nM+NA | 6      | -0.00073 | 0.24027   | -0.4914   | 0.48997   |
| 5nM+NA  | 6      | -0.10497 | 0.24027   | -0.5957   | 0.38573   |
| +NA     | 6      | -0.44086 | 0.24027   | -0.9316   | 0.04984   |

Std Error uses a pooled estimate of error variance

**Means Comparisons**

**Comparisons with a control using Dunnnett's Method**

**Oneway Analysis of thiamine By Label**

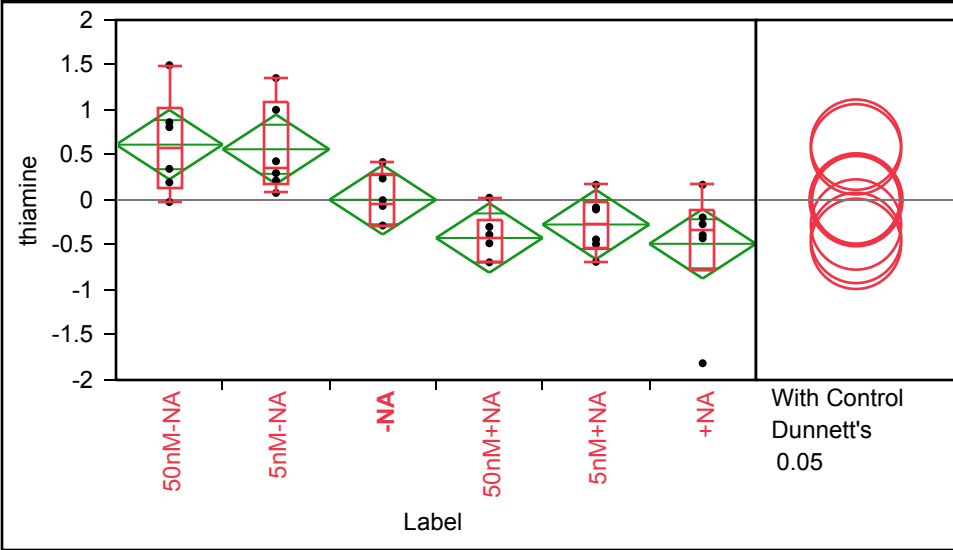

**Quantiles**

| Level   | Minimum  | 10%      | 25%      | Median   | 75%      | 90%      | Maximum  |
|---------|----------|----------|----------|----------|----------|----------|----------|
| 50nM-NA | -0.02248 | -0.02248 | 0.140847 | 0.577605 | 1.022589 | 1.497344 | 1.497344 |
| 5nM-NA  | 0.07867  | 0.07867  | 0.181834 | 0.364766 | 1.090291 | 1.354683 | 1.354683 |
| -NA     | -0.29359 | -0.29359 | -0.28602 | -0.03404 | 0.284551 | 0.421278 | 0.421278 |
| 50nM+NA | -0.69864 | -0.69864 | -0.69415 | -0.43296 | -0.21786 | 0.024988 | 0.024988 |
| 5nM+NA  | -0.68771 | -0.68771 | -0.53955 | -0.27162 | -0.01991 | 0.169669 | 0.169669 |
| +NA     | -1.81393 | -1.81393 | -0.77268 | -0.32854 | -0.10249 | 0.169174 | 0.169174 |

**Oneway Anova**

**Summary of Fit**

|                            |          |
|----------------------------|----------|
| Rsquare                    | 0.525622 |
| Adj Rsquare                | 0.446559 |
| Root Mean Square Error     | 0.462455 |
| Mean of Response           | -2.8e-11 |
| Observations (or Sum Wgts) | 36       |

**Analysis of Variance**

| Source   | DF | Sum of Squares | Mean Square | F Ratio | Prob > F |
|----------|----|----------------|-------------|---------|----------|
| Label    | 5  | 7.109016       | 1.42180     | 6.6481  | 0.0003 * |
| Error    | 30 | 6.415949       | 0.21386     |         |          |
| C. Total | 35 | 13.524966      |             |         |          |

**Means for Oneway Anova**

| Level   | Number | Mean     | Std Error | Lower 95% | Upper 95% |
|---------|--------|----------|-----------|-----------|-----------|
| 50nM-NA | 6      | 0.61495  | 0.18880   | 0.2294    | 1.001     |
| 5nM-NA  | 6      | 0.56354  | 0.18880   | 0.1780    | 0.949     |
| -NA     | 6      | 0.00251  | 0.18880   | -0.3831   | 0.388     |
| 50nM+NA | 6      | -0.42184 | 0.18880   | -0.8074   | -0.036    |
| 5nM+NA  | 6      | -0.27242 | 0.18880   | -0.6580   | 0.113     |
| +NA     | 6      | -0.48675 | 0.18880   | -0.8723   | -0.101    |

Std Error uses a pooled estimate of error variance

**Means Comparisons**

**Comparisons with a control using Dunnett's Method**

**Oneway Analysis of threonine By Label**

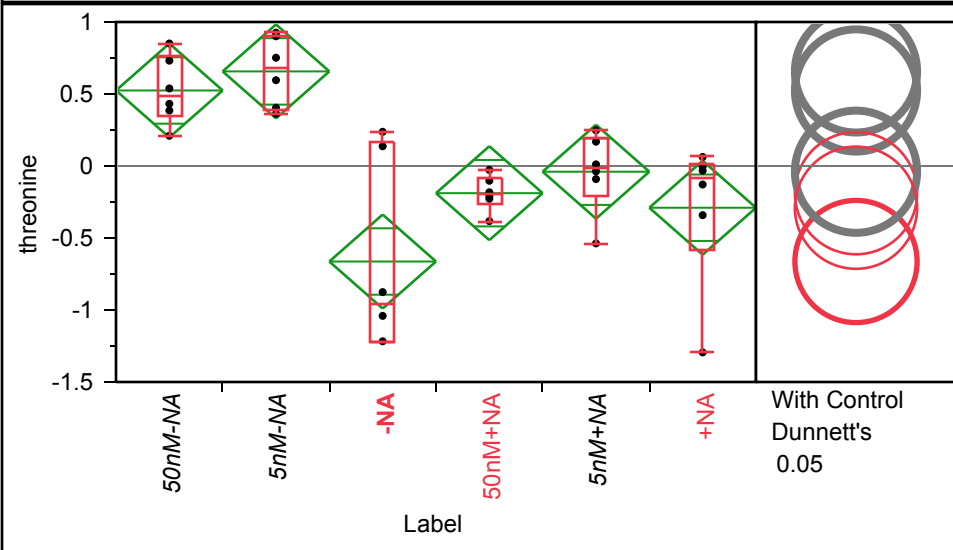

**Quantiles**

| Level   | Minimum  | 10%      | 25%      | Median   | 75%      | 90%      | Maximum  |
|---------|----------|----------|----------|----------|----------|----------|----------|
| 50nM-NA | 0.209812 | 0.209812 | 0.341115 | 0.4851   | 0.761375 | 0.850769 | 0.850769 |
| 5nM-NA  | 0.363014 | 0.363014 | 0.394134 | 0.673831 | 0.906964 | 0.925232 | 0.925232 |
| -NA     | -1.22007 | -1.22007 | -1.21813 | -0.95832 | 0.162208 | 0.237387 | 0.237387 |
| 50nM+NA | -0.3829  | -0.3829  | -0.2663  | -0.19616 | -0.08375 | -0.02726 | -0.02726 |
| 5nM+NA  | -0.53756 | -0.53756 | -0.20249 | -0.01287 | 0.188509 | 0.247631 | 0.247631 |
| +NA     | -1.29454 | -1.29454 | -0.57966 | -0.08053 | 0.012383 | 0.062617 | 0.062617 |

**Oneway Anova**

**Summary of Fit**

|                            |          |
|----------------------------|----------|
| Rsquare                    | 0.623656 |
| Adj Rsquare                | 0.560932 |
| Root Mean Square Error     | 0.391157 |
| Mean of Response           | -5.6e-11 |
| Observations (or Sum Wgts) | 36       |

**Analysis of Variance**

| Source   | DF | Sum of Squares | Mean Square | F Ratio | Prob > F |
|----------|----|----------------|-------------|---------|----------|
| Label    | 5  | 7.606461       | 1.52129     | 9.9428  | <.0001 * |
| Error    | 30 | 4.590112       | 0.15300     |         |          |
| C. Total | 35 | 12.196573      |             |         |          |

**Means for Oneway Anova**

| Level   | Number | Mean     | Std Error | Lower 95% | Upper 95% |
|---------|--------|----------|-----------|-----------|-----------|
| 50nM-NA | 6      | 0.52454  | 0.15969   | 0.1984    | 0.8507    |
| 5nM-NA  | 6      | 0.65688  | 0.15969   | 0.3308    | 0.9830    |
| -NA     | 6      | -0.66328 | 0.15969   | -0.9894   | -0.3371   |
| 50nM+NA | 6      | -0.18875 | 0.15969   | -0.5149   | 0.1374    |
| 5nM+NA  | 6      | -0.03961 | 0.15969   | -0.3657   | 0.2865    |
| +NA     | 6      | -0.28978 | 0.15969   | -0.6159   | 0.0363    |

Std Error uses a pooled estimate of error variance

**Means Comparisons**

**Comparisons with a control using Dunnnett's Method**

**Oneway Analysis of thymidine By Label**

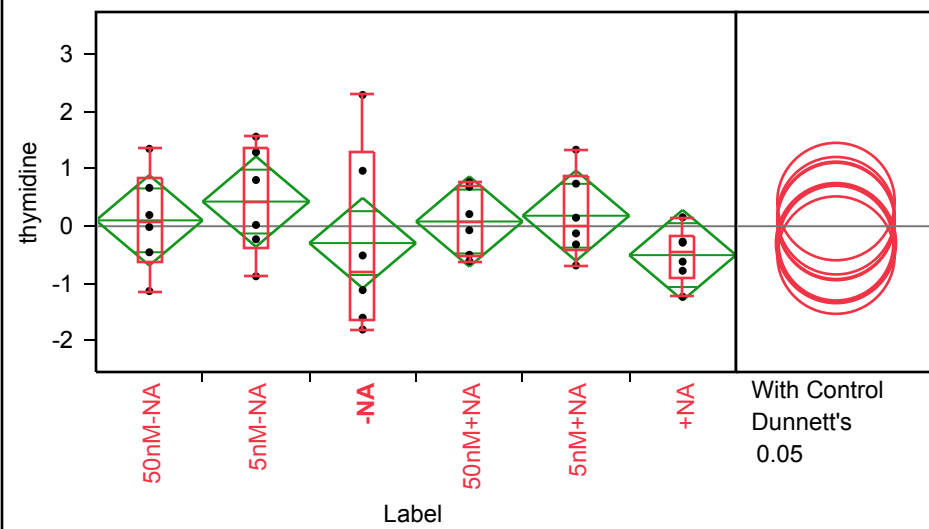

**Quantiles**

| Level   | Minimum  | 10%      | 25%      | Median   | 75%      | 90%      | Maximum  |
|---------|----------|----------|----------|----------|----------|----------|----------|
| 50nM-NA | -1.13003 | -1.13003 | -0.62299 | 0.090474 | 0.839021 | 1.349176 | 1.349176 |
| 5nM-NA  | -0.87287 | -0.87287 | -0.3882  | 0.413995 | 1.356836 | 1.560696 | 1.560696 |
| -NA     | -1.80114 | -1.80114 | -1.64626 | -0.8114  | 1.297044 | 2.288511 | 2.288511 |
| 50nM+NA | -0.60799 | -0.60799 | -0.52503 | 0.070832 | 0.708291 | 0.770689 | 0.770689 |
| 5nM+NA  | -0.68344 | -0.68344 | -0.40832 | 0.011832 | 0.889645 | 1.33326  | 1.33326  |
| +NA     | -1.22917 | -1.22917 | -0.88914 | -0.45246 | -0.16216 | 0.155006 | 0.155006 |

**Oneway Anova**

**Summary of Fit**

|                            |          |
|----------------------------|----------|
| Rsquare                    | 0.114577 |
| Adj Rsquare                | -0.03299 |
| Root Mean Square Error     | 0.943235 |
| Mean of Response           | 1.23e-17 |
| Observations (or Sum Wgts) | 36       |

**Analysis of Variance**

| Source   | DF | Sum of Squares | Mean Square | F Ratio | Prob > F |
|----------|----|----------------|-------------|---------|----------|
| Label    | 5  | 3.453870       | 0.690774    | 0.7764  | 0.5744   |
| Error    | 30 | 26.690788      | 0.889693    |         |          |
| C. Total | 35 | 30.144658      |             |         |          |

**Means for Oneway Anova**

| Level   | Number | Mean     | Std Error | Lower 95% | Upper 95% |
|---------|--------|----------|-----------|-----------|-----------|
| 50nM-NA | 6      | 0.10251  | 0.38507   | -0.684    | 0.8889    |
| 5nM-NA  | 6      | 0.42968  | 0.38507   | -0.357    | 1.2161    |
| -NA     | 6      | -0.29391 | 0.38507   | -1.080    | 0.4925    |
| 50nM+NA | 6      | 0.08241  | 0.38507   | -0.704    | 0.8688    |
| 5nM+NA  | 6      | 0.18311  | 0.38507   | -0.603    | 0.9695    |
| +NA     | 6      | -0.50379 | 0.38507   | -1.290    | 0.2826    |

Std Error uses a pooled estimate of error variance

**Means Comparisons**

**Comparisons with a control using Dunnett's Method**

**Oneway Analysis of trans, trans-farnesyl diphosphate By Label**

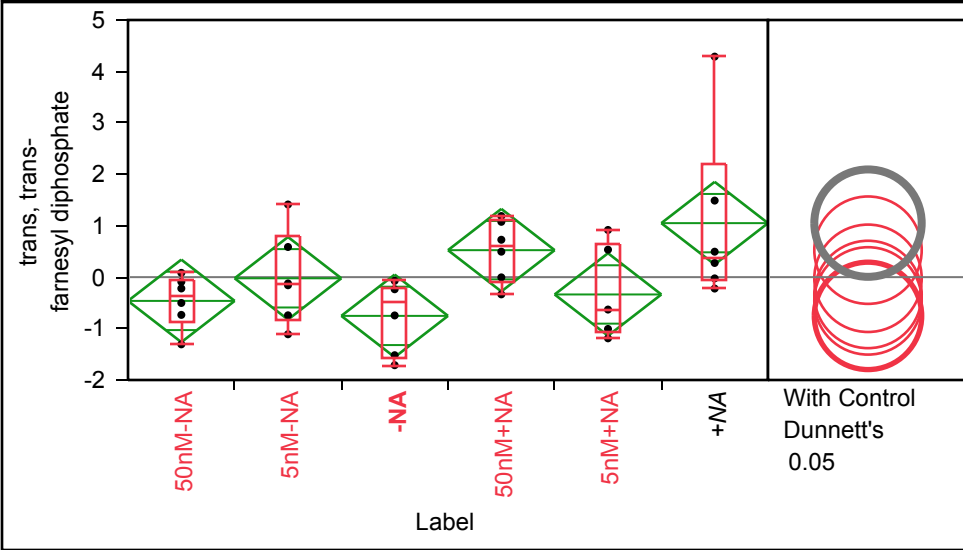

**Quantiles**

| Level   | Minimum  | 10%      | 25%      | Median   | 75%      | 90%      | Maximum  |
|---------|----------|----------|----------|----------|----------|----------|----------|
| 50nM-NA | -1.30665 | -1.30665 | -0.87724 | -0.36122 | -0.04805 | 0.082965 | 0.082965 |
| 5nM-NA  | -1.11056 | -1.11056 | -0.83438 | -0.14009 | 0.792783 | 1.412611 | 1.412611 |
| -NA     | -1.71209 | -1.71209 | -1.56656 | -0.49132 | -0.19458 | -0.07156 | -0.07156 |
| 50nM+NA | -0.33476 | -0.33476 | -0.08729 | 0.611066 | 1.103809 | 1.188144 | 1.188144 |
| 5nM+NA  | -1.18956 | -1.18956 | -1.05309 | -0.63738 | 0.629721 | 0.917205 | 0.917205 |
| +NA     | -0.22178 | -0.22178 | -0.07375 | 0.385215 | 2.188358 | 4.287777 | 4.287777 |

**Oneway Anova**

**Summary of Fit**

|                            |          |
|----------------------------|----------|
| Rsquare                    | 0.32913  |
| Adj Rsquare                | 0.217319 |
| Root Mean Square Error     | 0.962516 |
| Mean of Response           | 5.56e-11 |
| Observations (or Sum Wgts) | 36       |

**Analysis of Variance**

| Source   | DF | Sum of Squares | Mean Square | F Ratio | Prob > F |
|----------|----|----------------|-------------|---------|----------|
| Label    | 5  | 13.635377      | 2.72708     | 2.9436  | 0.0281 * |
| Error    | 30 | 27.793110      | 0.92644     |         |          |
| C. Total | 35 | 41.428488      |             |         |          |

**Means for Oneway Anova**

| Level   | Number | Mean    | Std Error | Lower 95% | Upper 95% |
|---------|--------|---------|-----------|-----------|-----------|
| 50nM-NA | 6      | -0.4620 | 0.39295   | -1.264    | 0.3405    |
| 5nM-NA  | 6      | -0.0224 | 0.39295   | -0.825    | 0.7801    |
| -NA     | 6      | -0.7533 | 0.39295   | -1.556    | 0.0492    |
| 50nM+NA | 6      | 0.5244  | 0.39295   | -0.278    | 1.3269    |
| 5nM+NA  | 6      | -0.3368 | 0.39295   | -1.139    | 0.4657    |
| +NA     | 6      | 1.0501  | 0.39295   | 0.248     | 1.8526    |

Std Error uses a pooled estimate of error variance

**Means Comparisons**

**Comparisons with a control using Dunnett's Method**

**Oneway Analysis of tryptophan By Label**

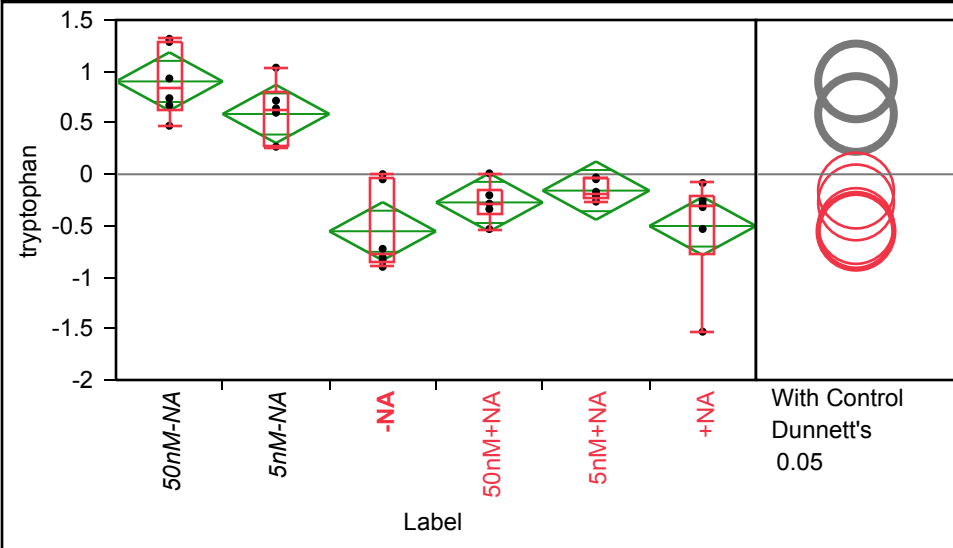

**Quantiles**

| Level   | Minimum  | 10%      | 25%      | Median   | 75%      | 90%      | Maximum  |
|---------|----------|----------|----------|----------|----------|----------|----------|
| 50nM-NA | 0.471929 | 0.471929 | 0.620385 | 0.835644 | 1.294286 | 1.316788 | 1.316788 |
| 5nM-NA  | 0.258286 | 0.258286 | 0.265391 | 0.619707 | 0.795858 | 1.036676 | 1.036676 |
| -NA     | -0.89964 | -0.89964 | -0.85766 | -0.76616 | -0.03645 | 0.001094 | 0.001094 |
| 50nM+NA | -0.53259 | -0.53259 | -0.38729 | -0.2878  | -0.15018 | 0.00909  | 0.00909  |
| 5nM+NA  | -0.26549 | -0.26549 | -0.23625 | -0.19097 | -0.04357 | -0.03039 | -0.03039 |
| +NA     | -1.53036 | -1.53036 | -0.78134 | -0.3066  | -0.2143  | -0.08462 | -0.08462 |

**Oneway Anova**

**Summary of Fit**

|                            |          |
|----------------------------|----------|
| Rsquare                    | 0.759698 |
| Adj Rsquare                | 0.719648 |
| Root Mean Square Error     | 0.339178 |
| Mean of Response           | 2.78e-11 |
| Observations (or Sum Wgts) | 36       |

**Analysis of Variance**

| Source   | DF | Sum of Squares | Mean Square | F Ratio | Prob > F |
|----------|----|----------------|-------------|---------|----------|
| Label    | 5  | 10.910873      | 2.18217     | 18.9686 | <.0001 * |
| Error    | 30 | 3.451244       | 0.11504     |         |          |
| C. Total | 35 | 14.362117      |             |         |          |

**Means for Oneway Anova**

| Level   | Number | Mean     | Std Error | Lower 95% | Upper 95% |
|---------|--------|----------|-----------|-----------|-----------|
| 50nM-NA | 6      | 0.90278  | 0.13847   | 0.6200    | 1.186     |
| 5nM-NA  | 6      | 0.58629  | 0.13847   | 0.3035    | 0.869     |
| -NA     | 6      | -0.55392 | 0.13847   | -0.8367   | -0.271    |
| 50nM+NA | 6      | -0.27354 | 0.13847   | -0.5563   | 0.00925   |
| 5nM+NA  | 6      | -0.15871 | 0.13847   | -0.4415   | 0.124     |
| +NA     | 6      | -0.50290 | 0.13847   | -0.7857   | -0.220    |

Std Error uses a pooled estimate of error variance

**Means Comparisons**

**Comparisons with a control using Dunnett's Method**



**Oneway Analysis of tyrosine By Label**

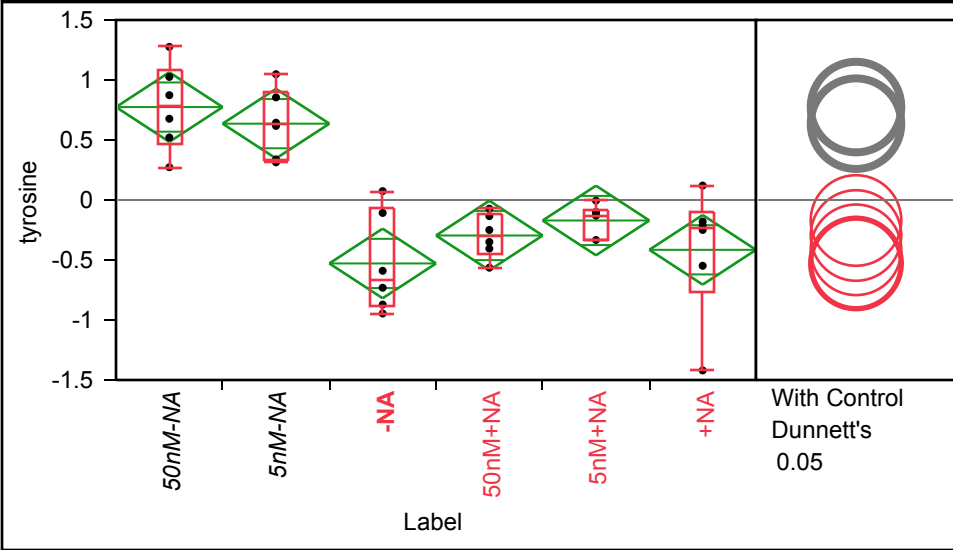

**Quantiles**

| Level   | Minimum  | 10%      | 25%      | Median   | 75%      | 90%      | Maximum  |
|---------|----------|----------|----------|----------|----------|----------|----------|
| 50nM-NA | 0.272972 | 0.272972 | 0.45913  | 0.775351 | 1.088012 | 1.275921 | 1.275921 |
| 5nM-NA  | 0.313714 | 0.313714 | 0.331979 | 0.630705 | 0.903382 | 1.048178 | 1.048178 |
| -NA     | -0.94571 | -0.94571 | -0.89002 | -0.66056 | -0.06241 | 0.073837 | 0.073837 |
| 50nM+NA | -0.56387 | -0.56387 | -0.4446  | -0.29976 | -0.11875 | -0.07241 | -0.07241 |
| 5nM+NA  | -0.33529 | -0.33529 | -0.3337  | -0.12613 | -0.07527 | -0.00557 | -0.00557 |
| +NA     | -1.42011 | -1.42011 | -0.76622 | -0.23147 | -0.10479 | 0.120443 | 0.120443 |

**Oneway Anova**

**Summary of Fit**

|                            |          |
|----------------------------|----------|
| Rsquare                    | 0.722226 |
| Adj Rsquare                | 0.675931 |
| Root Mean Square Error     | 0.347821 |
| Mean of Response           | -1.1e-10 |
| Observations (or Sum Wgts) | 36       |

**Analysis of Variance**

| Source   | DF | Sum of Squares | Mean Square | F Ratio | Prob > F |
|----------|----|----------------|-------------|---------|----------|
| Label    | 5  | 9.436606       | 1.88732     | 15.6003 | <.0001 * |
| Error    | 30 | 3.629393       | 0.12098     |         |          |
| C. Total | 35 | 13.065999      |             |         |          |

**Means for Oneway Anova**

| Level   | Number | Mean     | Std Error | Lower 95% | Upper 95% |
|---------|--------|----------|-----------|-----------|-----------|
| 50nM-NA | 6      | 0.77436  | 0.14200   | 0.4844    | 1.064     |
| 5nM-NA  | 6      | 0.63608  | 0.14200   | 0.3461    | 0.926     |
| -NA     | 6      | -0.52871 | 0.14200   | -0.8187   | -0.239    |
| 50nM+NA | 6      | -0.29581 | 0.14200   | -0.5858   | -0.0058   |
| 5nM+NA  | 6      | -0.17080 | 0.14200   | -0.4608   | 0.119     |
| +NA     | 6      | -0.41512 | 0.14200   | -0.7051   | -0.125    |

Std Error uses a pooled estimate of error variance

**Means Comparisons**

**Comparisons with a control using Dunnnett's Method**

**Oneway Analysis of UDP By Label**

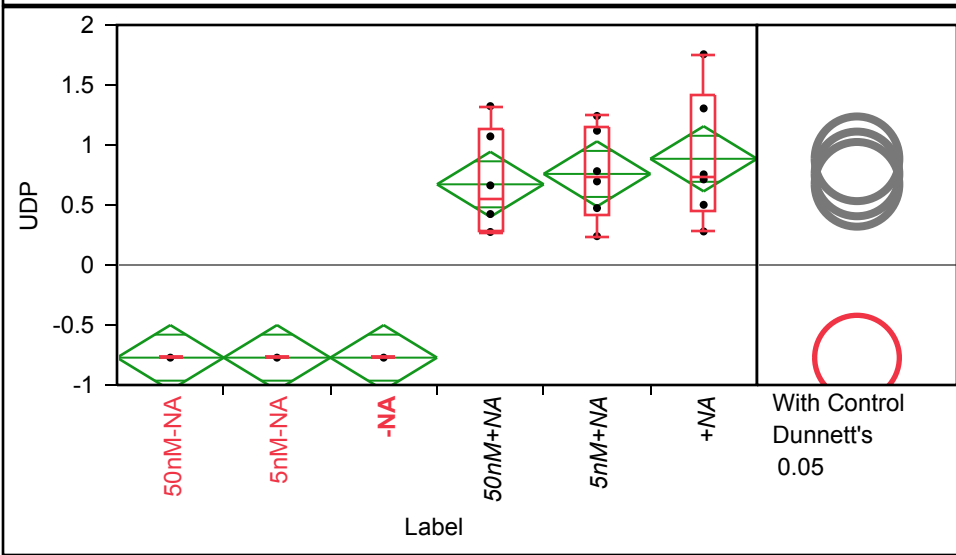

**Quantiles**

| Level   | Minimum  | 10%      | 25%      | Median   | 75%      | 90%      | Maximum  |
|---------|----------|----------|----------|----------|----------|----------|----------|
| 50nM-NA | -0.7721  | -0.7721  | -0.77209 | -0.77208 | -0.77208 | -0.77207 | -0.77207 |
| 5nM-NA  | -0.7721  | -0.7721  | -0.7721  | -0.77209 | -0.77208 | -0.77208 | -0.77208 |
| -NA     | -0.77211 | -0.77211 | -0.7721  | -0.77209 | -0.77209 | -0.77209 | -0.77209 |
| 50nM+NA | 0.274733 | 0.274733 | 0.27507  | 0.544072 | 1.134691 | 1.323925 | 1.323925 |
| 5nM+NA  | 0.240309 | 0.240309 | 0.415629 | 0.739233 | 1.149639 | 1.242242 | 1.242242 |
| +NA     | 0.279399 | 0.279399 | 0.445966 | 0.734244 | 1.417547 | 1.756089 | 1.756089 |

**Oneway Anova**

**Summary of Fit**

|                            |          |
|----------------------------|----------|
| Rsquare                    | 0.871873 |
| Adj Rsquare                | 0.850518 |
| Root Mean Square Error     | 0.325266 |
| Mean of Response           | 7.4e-17  |
| Observations (or Sum Wgts) | 36       |

**Analysis of Variance**

| Source   | DF | Sum of Squares | Mean Square | F Ratio | Prob > F |
|----------|----|----------------|-------------|---------|----------|
| Label    | 5  | 21.597773      | 4.31955     | 40.8284 | <.0001 * |
| Error    | 30 | 3.173934       | 0.10580     |         |          |
| C. Total | 35 | 24.771707      |             |         |          |

**Means for Oneway Anova**

| Level   | Number | Mean     | Std Error | Lower 95% | Upper 95% |
|---------|--------|----------|-----------|-----------|-----------|
| 50nM-NA | 6      | -0.77208 | 0.13279   | -1.043    | -0.501    |
| 5nM-NA  | 6      | -0.77209 | 0.13279   | -1.043    | -0.501    |
| -NA     | 6      | -0.77210 | 0.13279   | -1.043    | -0.501    |
| 50nM+NA | 6      | 0.67227  | 0.13279   | 0.401     | 0.943     |
| 5nM+NA  | 6      | 0.75898  | 0.13279   | 0.488     | 1.030     |
| +NA     | 6      | 0.88503  | 0.13279   | 0.614     | 1.156     |

Std Error uses a pooled estimate of error variance

**Means Comparisons**

**Comparisons with a control using Dunnnett's Method**

**Oneway Analysis of UDP-D-glucuronate By Label**

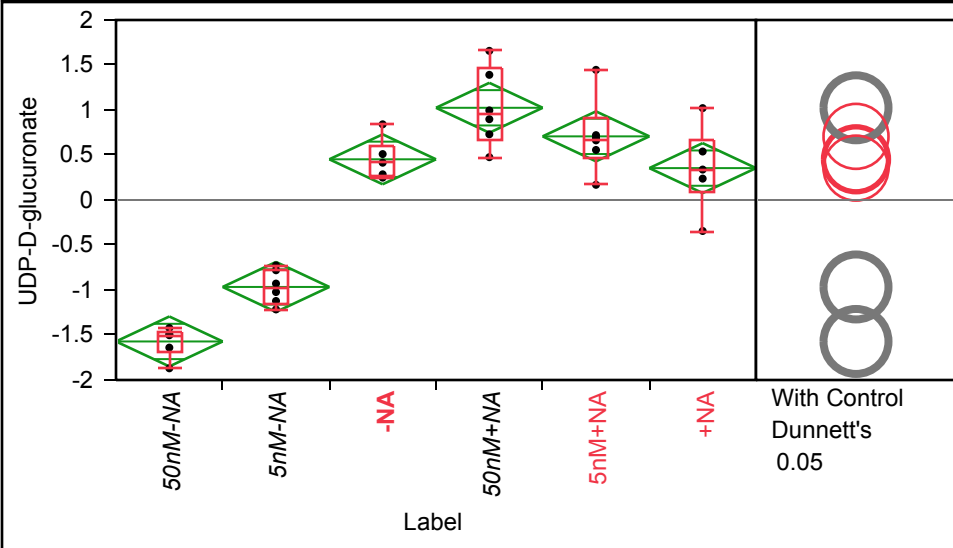

**Quantiles**

| Level   | Minimum  | 10%      | 25%      | Median   | 75%      | 90%      | Maximum  |
|---------|----------|----------|----------|----------|----------|----------|----------|
| 50nM-NA | -1.87012 | -1.87012 | -1.69766 | -1.50432 | -1.47281 | -1.42242 | -1.42242 |
| 5nM-NA  | -1.21579 | -1.21579 | -1.14555 | -0.97581 | -0.7672  | -0.72696 | -0.72696 |
| -NA     | 0.248811 | 0.248811 | 0.276075 | 0.414149 | 0.592813 | 0.840767 | 0.840767 |
| 50nM+NA | 0.475666 | 0.475666 | 0.666557 | 0.946561 | 1.457302 | 1.657119 | 1.657119 |
| 5nM+NA  | 0.168882 | 0.168882 | 0.459183 | 0.675358 | 0.901938 | 1.445967 | 1.445967 |
| +NA     | -0.34445 | -0.34445 | 0.092041 | 0.33671  | 0.659242 | 1.020738 | 1.020738 |

**Oneway Anova**

**Summary of Fit**

|                            |          |
|----------------------------|----------|
| Rsquare                    | 0.905151 |
| Adj Rsquare                | 0.889342 |
| Root Mean Square Error     | 0.332764 |
| Mean of Response           | 4.93e-17 |
| Observations (or Sum Wgts) | 36       |

**Analysis of Variance**

| Source   | DF | Sum of Squares | Mean Square | F Ratio | Prob > F |
|----------|----|----------------|-------------|---------|----------|
| Label    | 5  | 31.701593      | 6.34032     | 57.2582 | <.0001 * |
| Error    | 30 | 3.321963       | 0.11073     |         |          |
| C. Total | 35 | 35.023557      |             |         |          |

**Means for Oneway Anova**

| Level   | Number | Mean    | Std Error | Lower 95% | Upper 95% |
|---------|--------|---------|-----------|-----------|-----------|
| 50nM-NA | 6      | -1.5718 | 0.13585   | -1.849    | -1.294    |
| 5nM-NA  | 6      | -0.9662 | 0.13585   | -1.244    | -0.689    |
| -NA     | 6      | 0.4522  | 0.13585   | 0.175     | 0.730     |
| 50nM+NA | 6      | 1.0245  | 0.13585   | 0.747     | 1.302     |
| 5nM+NA  | 6      | 0.7070  | 0.13585   | 0.430     | 0.984     |
| +NA     | 6      | 0.3543  | 0.13585   | 0.077     | 0.632     |

Std Error uses a pooled estimate of error variance

**Means Comparisons**

**Comparisons with a control using Dunnett's Method**

**Oneway Analysis of UDP-glucose By Label**

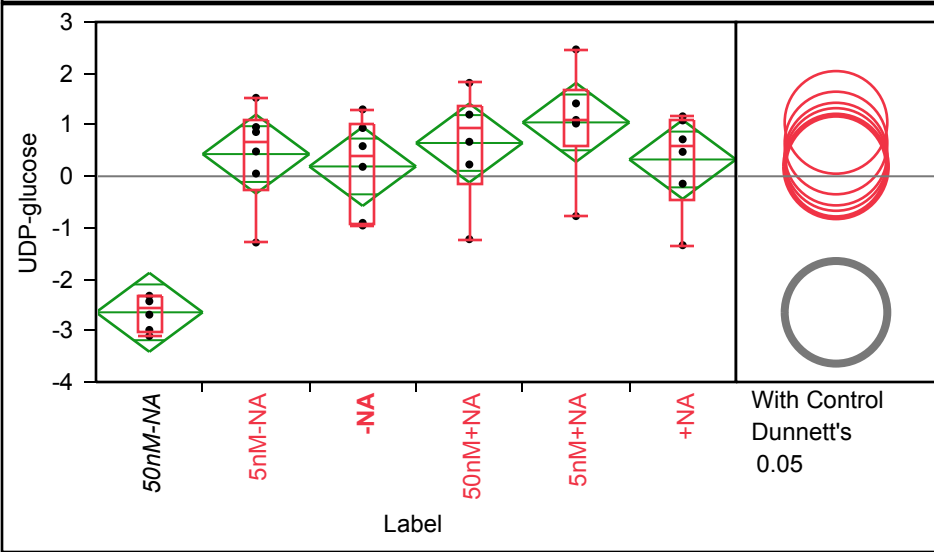

**Quantiles**

| Level   | Minimum  | 10%      | 25%      | Median   | 75%      | 90%      | Maximum  |
|---------|----------|----------|----------|----------|----------|----------|----------|
| 50nM-NA | -3.1041  | -3.1041  | -3.01702 | -2.56067 | -2.33103 | -2.32291 | -2.32291 |
| 5nM-NA  | -1.28756 | -1.28756 | -0.28214 | 0.671244 | 1.09909  | 1.525452 | 1.525452 |
| -NA     | -0.95681 | -0.95681 | -0.91875 | 0.385407 | 1.029249 | 1.300876 | 1.300876 |
| 50nM+NA | -1.22321 | -1.22321 | -0.13382 | 0.931204 | 1.353874 | 1.816332 | 1.816332 |
| 5nM+NA  | -0.7742  | -0.7742  | 0.575758 | 1.075966 | 1.679213 | 2.466466 | 2.466466 |
| +NA     | -1.34007 | -1.34007 | -0.44318 | 0.596715 | 1.106029 | 1.16558  | 1.16558  |

**Oneway Anova**

**Summary of Fit**

|                            |          |
|----------------------------|----------|
| Rsquare                    | 0.676489 |
| Adj Rsquare                | 0.62257  |
| Root Mean Square Error     | 0.919659 |
| Mean of Response           | -2.8e-10 |
| Observations (or Sum Wgts) | 36       |

**Analysis of Variance**

| Source   | DF | Sum of Squares | Mean Square | F Ratio | Prob > F |
|----------|----|----------------|-------------|---------|----------|
| Label    | 5  | 53.057362      | 10.6115     | 12.5465 | <.0001 * |
| Error    | 30 | 25.373169      | 0.8458      |         |          |
| C. Total | 35 | 78.430531      |             |         |          |

**Means for Oneway Anova**

| Level   | Number | Mean    | Std Error | Lower 95% | Upper 95% |
|---------|--------|---------|-----------|-----------|-----------|
| 50nM-NA | 6      | -2.6450 | 0.37545   | -3.412    | -1.878    |
| 5nM-NA  | 6      | 0.4317  | 0.37545   | -0.335    | 1.198     |
| -NA     | 6      | 0.1913  | 0.37545   | -0.576    | 0.958     |
| 50nM+NA | 6      | 0.6474  | 0.37545   | -0.119    | 1.414     |
| 5nM+NA  | 6      | 1.0478  | 0.37545   | 0.281     | 1.815     |
| +NA     | 6      | 0.3268  | 0.37545   | -0.440    | 1.094     |

Std Error uses a pooled estimate of error variance

**Means Comparisons**

**Comparisons with a control using Dunnnett's Method**

**Oneway Analysis of UDP-N-acetyl-glucosamine By Label**

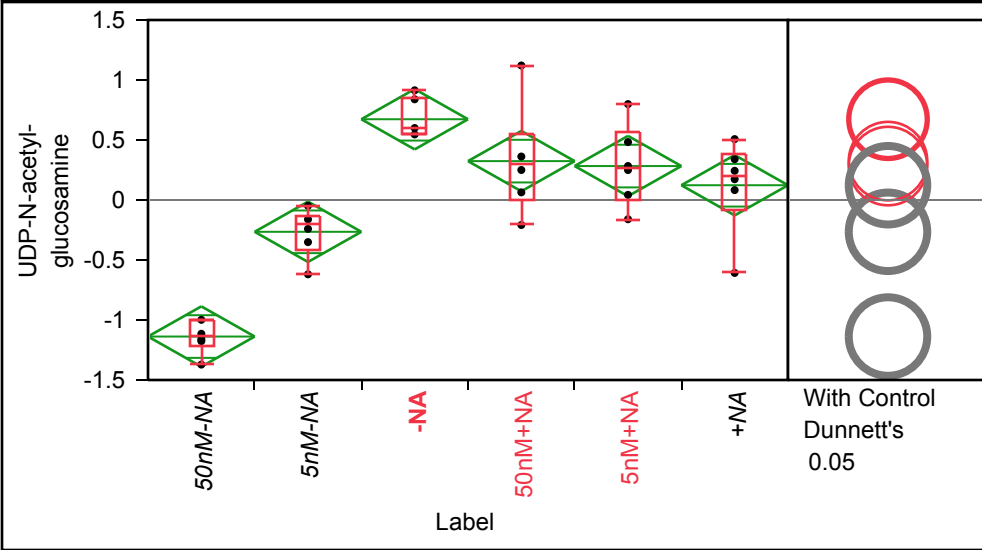

**Quantiles**

| Level   | Minimum  | 10%      | 25%      | Median   | 75%      | 90%      | Maximum  |
|---------|----------|----------|----------|----------|----------|----------|----------|
| 50nM-NA | -1.37157 | -1.37157 | -1.22497 | -1.13759 | -1.00388 | -0.99849 | -0.99849 |
| 5nM-NA  | -0.61915 | -0.61915 | -0.41803 | -0.20509 | -0.13322 | -0.04849 | -0.04849 |
| -NA     | 0.542175 | 0.542175 | 0.545475 | 0.59807  | 0.857917 | 0.913982 | 0.913982 |
| 50nM+NA | -0.20831 | -0.20831 | -0.00427 | 0.302848 | 0.551703 | 1.120617 | 1.120617 |
| 5nM+NA  | -0.16024 | -0.16024 | -0.00796 | 0.266409 | 0.56171  | 0.799039 | 0.799039 |
| +NA     | -0.60777 | -0.60777 | -0.08996 | 0.208083 | 0.381867 | 0.507262 | 0.507262 |

**Oneway Anova**

**Summary of Fit**

|                            |          |
|----------------------------|----------|
| Rsquare                    | 0.816201 |
| Adj Rsquare                | 0.785567 |
| Root Mean Square Error     | 0.301471 |
| Mean of Response           | 5.56e-10 |
| Observations (or Sum Wgts) | 36       |

**Analysis of Variance**

| Source   | DF | Sum of Squares | Mean Square | F Ratio | Prob > F |
|----------|----|----------------|-------------|---------|----------|
| Label    | 5  | 12.107805      | 2.42156     | 26.6443 | <.0001 * |
| Error    | 30 | 2.726546       | 0.09088     |         |          |
| C. Total | 35 | 14.834350      |             |         |          |

**Means for Oneway Anova**

| Level   | Number | Mean    | Std Error | Lower 95% | Upper 95% |
|---------|--------|---------|-----------|-----------|-----------|
| 50nM-NA | 6      | -1.1378 | 0.12308   | -1.389    | -0.8865   |
| 5nM-NA  | 6      | -0.2650 | 0.12308   | -0.516    | -0.0137   |
| -NA     | 6      | 0.6730  | 0.12308   | 0.422     | 0.9244    |
| 50nM+NA | 6      | 0.3240  | 0.12308   | 0.073     | 0.5753    |
| 5nM+NA  | 6      | 0.2828  | 0.12308   | 0.031     | 0.5342    |
| +NA     | 6      | 0.1231  | 0.12308   | -0.128    | 0.3744    |

Std Error uses a pooled estimate of error variance

**Means Comparisons**

**Comparisons with a control using Dunnett's Method**

**Oneway Analysis of uracil By Label**

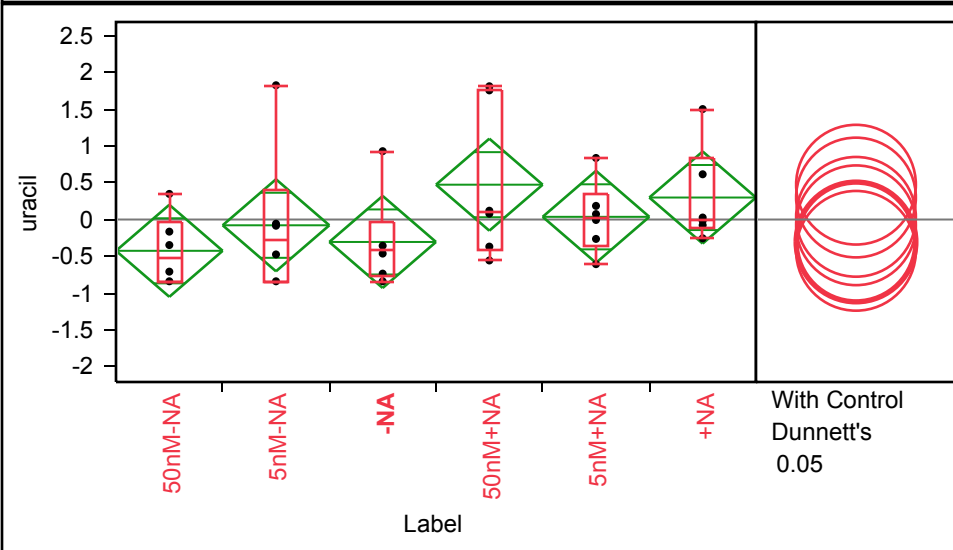

**Quantiles**

| Level   | Minimum  | 10%      | 25%      | Median   | 75%      | 90%      | Maximum  |
|---------|----------|----------|----------|----------|----------|----------|----------|
| 50nM-NA | -0.83924 | -0.83924 | -0.83923 | -0.5275  | -0.0366  | 0.347807 | 0.347807 |
| 5nM-NA  | -0.83925 | -0.83925 | -0.83923 | -0.27934 | 0.41313  | 1.823905 | 1.823905 |
| -NA     | -0.83924 | -0.83924 | -0.76117 | -0.41365 | -0.03544 | 0.928344 | 0.928344 |
| 50nM+NA | -0.55636 | -0.55636 | -0.41502 | 0.09936  | 1.768363 | 1.810266 | 1.810266 |
| 5nM+NA  | -0.60631 | -0.60631 | -0.3493  | 0.033744 | 0.348051 | 0.836187 | 0.836187 |
| +NA     | -0.25527 | -0.25527 | -0.12155 | 0.004902 | 0.836047 | 1.50049  | 1.50049  |

**Oneway Anova**

**Summary of Fit**

|                            |          |
|----------------------------|----------|
| Rsquare                    | 0.174571 |
| Adj Rsquare                | 0.037    |
| Root Mean Square Error     | 0.749706 |
| Mean of Response           | 2.78e-10 |
| Observations (or Sum Wgts) | 36       |

**Analysis of Variance**

| Source   | DF | Sum of Squares | Mean Square | F Ratio | Prob > F |
|----------|----|----------------|-------------|---------|----------|
| Label    | 5  | 3.566121       | 0.713224    | 1.2689  | 0.3030   |
| Error    | 30 | 16.861766      | 0.562059    |         |          |
| C. Total | 35 | 20.427887      |             |         |          |

**Means for Oneway Anova**

| Level   | Number | Mean     | Std Error | Lower 95% | Upper 95% |
|---------|--------|----------|-----------|-----------|-----------|
| 50nM-NA | 6      | -0.42506 | 0.30607   | -1.050    | 0.2000    |
| 5nM-NA  | 6      | -0.07840 | 0.30607   | -0.703    | 0.5467    |
| -NA     | 6      | -0.30501 | 0.30607   | -0.930    | 0.3201    |
| 50nM+NA | 6      | 0.47318  | 0.30607   | -0.152    | 1.0983    |
| 5nM+NA  | 6      | 0.03651  | 0.30607   | -0.589    | 0.6616    |
| +NA     | 6      | 0.29877  | 0.30607   | -0.326    | 0.9238    |

Std Error uses a pooled estimate of error variance

**Means Comparisons**

**Comparisons with a control using Dunnnett's Method**

**Oneway Analysis of Uric acid By Label**

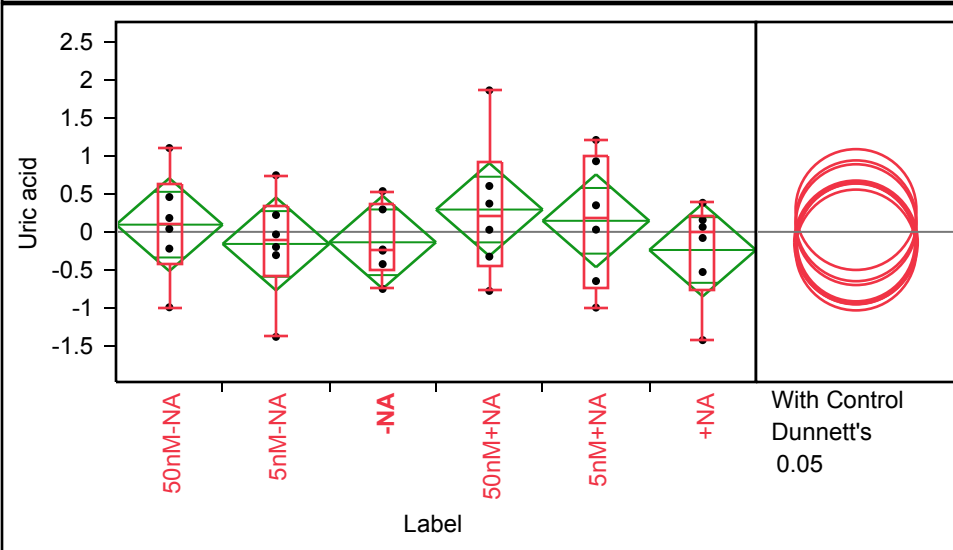

**Quantiles**

| Level   | Minimum  | 10%      | 25%      | Median   | 75%      | 90%      | Maximum  |
|---------|----------|----------|----------|----------|----------|----------|----------|
| 50nM-NA | -0.99156 | -0.99156 | -0.41331 | 0.110983 | 0.618757 | 1.101647 | 1.101647 |
| 5nM-NA  | -1.37976 | -1.37976 | -0.57429 | -0.11579 | 0.352343 | 0.74423  | 0.74423  |
| -NA     | -0.75027 | -0.75027 | -0.50519 | -0.23936 | 0.355379 | 0.535605 | 0.535605 |
| 50nM+NA | -0.77588 | -0.77588 | -0.43802 | 0.199331 | 0.91715  | 1.859573 | 1.859573 |
| 5nM+NA  | -0.99541 | -0.99541 | -0.73387 | 0.189207 | 0.998261 | 1.207734 | 1.207734 |
| +NA     | -1.42293 | -1.42293 | -0.75147 | -0.00815 | 0.212532 | 0.381844 | 0.381844 |

**Oneway Anova**

**Summary of Fit**

|                            |          |
|----------------------------|----------|
| Rsquare                    | 0.074901 |
| Adj Rsquare                | -0.07928 |
| Root Mean Square Error     | 0.731786 |
| Mean of Response           | 8.33e-10 |
| Observations (or Sum Wgts) | 36       |

**Analysis of Variance**

| Source   | DF | Sum of Squares | Mean Square | F Ratio | Prob > F |
|----------|----|----------------|-------------|---------|----------|
| Label    | 5  | 1.300745       | 0.260149    | 0.4858  | 0.7841   |
| Error    | 30 | 16.065342      | 0.535511    |         |          |
| C. Total | 35 | 17.366087      |             |         |          |

**Means for Oneway Anova**

| Level   | Number | Mean     | Std Error | Lower 95% | Upper 95% |
|---------|--------|----------|-----------|-----------|-----------|
| 50nM-NA | 6      | 0.09488  | 0.29875   | -0.5153   | 0.70501   |
| 5nM-NA  | 6      | -0.15853 | 0.29875   | -0.7687   | 0.45160   |
| -NA     | 6      | -0.13693 | 0.29875   | -0.7471   | 0.47320   |
| 50nM+NA | 6      | 0.29333  | 0.29875   | -0.3168   | 0.90346   |
| 5nM+NA  | 6      | 0.14541  | 0.29875   | -0.4647   | 0.75554   |
| +NA     | 6      | -0.23816 | 0.29875   | -0.8483   | 0.37197   |

Std Error uses a pooled estimate of error variance

**Means Comparisons**

**Comparisons with a control using Dunnnett's Method**

**Oneway Analysis of UTP By Label**

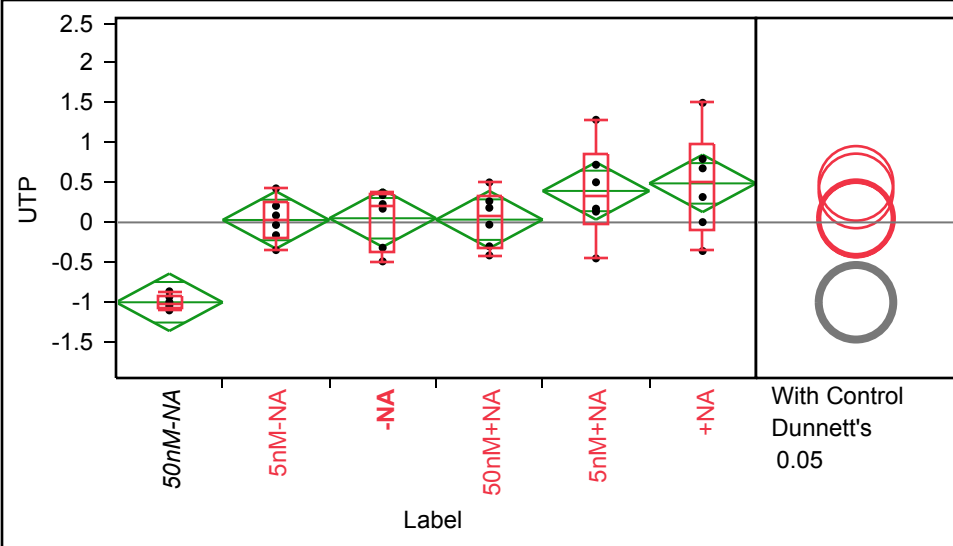

**Quantiles**

| Level   | Minimum  | 10%      | 25%      | Median   | 75%      | 90%      | Maximum  |
|---------|----------|----------|----------|----------|----------|----------|----------|
| 50nM-NA | -1.10348 | -1.10348 | -1.07892 | -1.0193  | -0.91572 | -0.8648  | -0.8648  |
| 5nM-NA  | -0.34738 | -0.34738 | -0.20705 | 0.027993 | 0.262369 | 0.42664  | 0.42664  |
| -NA     | -0.48901 | -0.48901 | -0.36057 | 0.200817 | 0.350773 | 0.37541  | 0.37541  |
| 50nM+NA | -0.41397 | -0.41397 | -0.32861 | 0.077627 | 0.325077 | 0.501518 | 0.501518 |
| 5nM+NA  | -0.45123 | -0.45123 | -0.01161 | 0.337807 | 0.863927 | 1.286805 | 1.286805 |
| +NA     | -0.35858 | -0.35858 | -0.08716 | 0.498364 | 0.971701 | 1.499718 | 1.499718 |

**Oneway Anova**

**Summary of Fit**

|                            |          |
|----------------------------|----------|
| Rsquare                    | 0.601807 |
| Adj Rsquare                | 0.535442 |
| Root Mean Square Error     | 0.431007 |
| Mean of Response           | 5.56e-11 |
| Observations (or Sum Wgts) | 36       |

**Analysis of Variance**

| Source   | DF | Sum of Squares | Mean Square | F Ratio | Prob > F |
|----------|----|----------------|-------------|---------|----------|
| Label    | 5  | 8.422751       | 1.68455     | 9.0681  | <.0001 * |
| Error    | 30 | 5.573009       | 0.18577     |         |          |
| C. Total | 35 | 13.995761      |             |         |          |

**Means for Oneway Anova**

| Level   | Number | Mean    | Std Error | Lower 95% | Upper 95% |
|---------|--------|---------|-----------|-----------|-----------|
| 50nM-NA | 6      | -1.0017 | 0.17596   | -1.361    | -0.6424   |
| 5nM-NA  | 6      | 0.0304  | 0.17596   | -0.329    | 0.3898    |
| -NA     | 6      | 0.0521  | 0.17596   | -0.307    | 0.4115    |
| 50nM+NA | 6      | 0.0348  | 0.17596   | -0.325    | 0.3942    |
| 5nM+NA  | 6      | 0.3948  | 0.17596   | 0.035     | 0.7542    |
| +NA     | 6      | 0.4895  | 0.17596   | 0.130     | 0.8488    |

Std Error uses a pooled estimate of error variance

**Means Comparisons**

**Comparisons with a control using Dunnett's Method**



**Oneway Analysis of valine By Label**

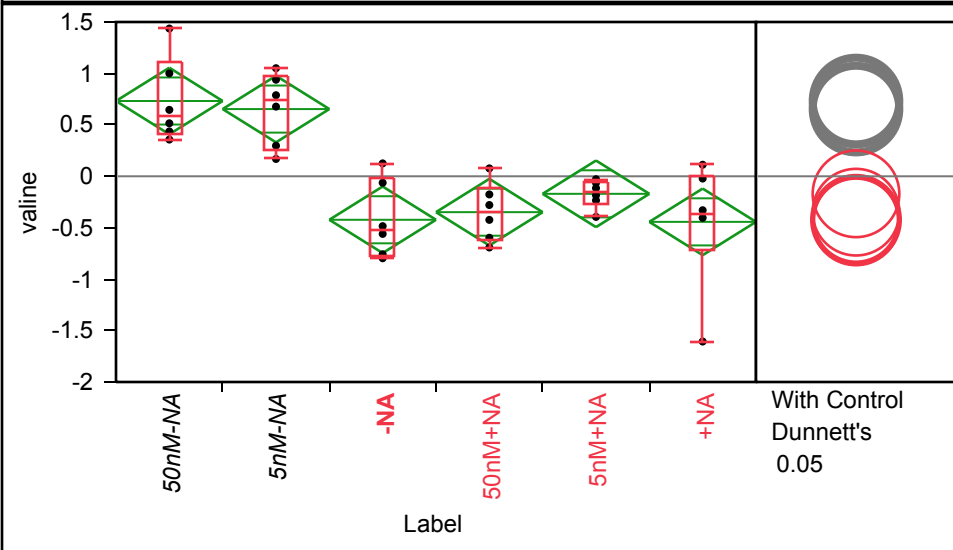

**Quantiles**

| Level   | Minimum  | 10%      | 25%      | Median   | 75%      | 90%      | Maximum  |
|---------|----------|----------|----------|----------|----------|----------|----------|
| 50nM-NA | 0.357127 | 0.357127 | 0.416385 | 0.580466 | 1.109769 | 1.436303 | 1.436303 |
| 5nM-NA  | 0.168539 | 0.168539 | 0.265037 | 0.732806 | 0.966652 | 1.050723 | 1.050723 |
| -NA     | -0.79695 | -0.79695 | -0.76772 | -0.52242 | -0.01569 | 0.12531  | 0.12531  |
| 50nM+NA | -0.69245 | -0.69245 | -0.62138 | -0.35157 | -0.11309 | 0.07684  | 0.07684  |
| 5nM+NA  | -0.39486 | -0.39486 | -0.27465 | -0.15036 | -0.05552 | -0.02862 | -0.02862 |
| +NA     | -1.60656 | -1.60656 | -0.70788 | -0.36709 | 0.011589 | 0.112067 | 0.112067 |

**Oneway Anova**

**Summary of Fit**

|                            |          |
|----------------------------|----------|
| Rsquare                    | 0.663929 |
| Adj Rsquare                | 0.607918 |
| Root Mean Square Error     | 0.388205 |
| Mean of Response           | 0        |
| Observations (or Sum Wgts) | 36       |

**Analysis of Variance**

| Source   | DF | Sum of Squares | Mean Square | F Ratio | Prob > F |
|----------|----|----------------|-------------|---------|----------|
| Label    | 5  | 8.931719       | 1.78634     | 11.8534 | <.0001 * |
| Error    | 30 | 4.521096       | 0.15070     |         |          |
| C. Total | 35 | 13.452815      |             |         |          |

**Means for Oneway Anova**

| Level   | Number | Mean     | Std Error | Lower 95% | Upper 95% |
|---------|--------|----------|-----------|-----------|-----------|
| 50nM-NA | 6      | 0.73190  | 0.15848   | 0.4082    | 1.056     |
| 5nM-NA  | 6      | 0.65345  | 0.15848   | 0.3298    | 0.977     |
| -NA     | 6      | -0.42285 | 0.15848   | -0.7465   | -0.099    |
| 50nM+NA | 6      | -0.34881 | 0.15848   | -0.6725   | -0.025    |
| 5nM+NA  | 6      | -0.17055 | 0.15848   | -0.4942   | 0.153     |
| +NA     | 6      | -0.44315 | 0.15848   | -0.7668   | -0.119    |

Std Error uses a pooled estimate of error variance

**Means Comparisons**

**Comparisons with a control using Dunnett's Method**

**Oneway Analysis of xanthine By Label**

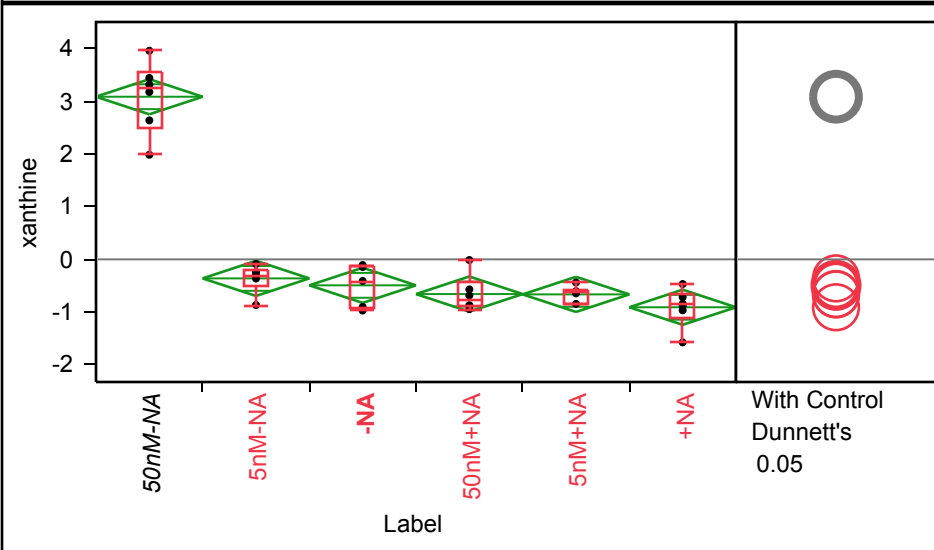

**Quantiles**

| Level   | Minimum  | 10%      | 25%      | Median   | 75%      | 90%      | Maximum  |
|---------|----------|----------|----------|----------|----------|----------|----------|
| 50nM-NA | 1.982983 | 1.982983 | 2.471661 | 3.243654 | 3.568356 | 3.955351 | 3.955351 |
| 5nM-NA  | -0.86571 | -0.86571 | -0.48907 | -0.30301 | -0.20293 | -0.08825 | -0.08825 |
| -NA     | -0.96994 | -0.96994 | -0.91872 | -0.41515 | -0.13511 | -0.10755 | -0.10755 |
| 50nM+NA | -0.94265 | -0.94265 | -0.88903 | -0.7761  | -0.4306  | -0.01298 | -0.01298 |
| 5nM+NA  | -0.84534 | -0.84534 | -0.84457 | -0.6265  | -0.56196 | -0.43783 | -0.43783 |
| +NA     | -1.57404 | -1.57404 | -1.11799 | -0.86227 | -0.65382 | -0.46831 | -0.46831 |

**Oneway Anova**

**Summary of Fit**

|                            |          |
|----------------------------|----------|
| Rsquare                    | 0.9355   |
| Adj Rsquare                | 0.92475  |
| Root Mean Square Error     | 0.39956  |
| Mean of Response           | 2.78e-10 |
| Observations (or Sum Wgts) | 36       |

**Analysis of Variance**

| Source   | DF | Sum of Squares | Mean Square | F Ratio | Prob > F |
|----------|----|----------------|-------------|---------|----------|
| Label    | 5  | 69.465675      | 13.8931     | 87.0235 | <.0001 * |
| Error    | 30 | 4.789445       | 0.1596      |         |          |
| C. Total | 35 | 74.255119      |             |         |          |

**Means for Oneway Anova**

| Level   | Number | Mean    | Std Error | Lower 95% | Upper 95% |
|---------|--------|---------|-----------|-----------|-----------|
| 50nM-NA | 6      | 3.0833  | 0.16312   | 2.750     | 3.416     |
| 5nM-NA  | 6      | -0.3608 | 0.16312   | -0.694    | -0.028    |
| -NA     | 6      | -0.4923 | 0.16312   | -0.825    | -0.159    |
| 50nM+NA | 6      | -0.6581 | 0.16312   | -0.991    | -0.325    |
| 5nM+NA  | 6      | -0.6640 | 0.16312   | -0.997    | -0.331    |
| +NA     | 6      | -0.9081 | 0.16312   | -1.241    | -0.575    |

Std Error uses a pooled estimate of error variance

**Means Comparisons**

**Comparisons with a control using Dunnett's Method**

**Oneway Analysis of Xanthurenic acid By Label**

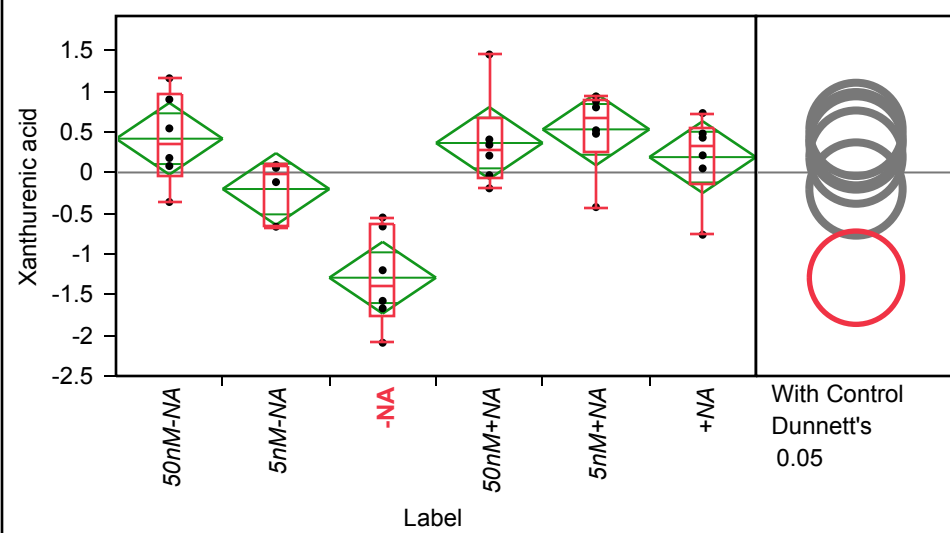

**Quantiles**

| Level   | Minimum  | 10%      | 25%      | Median   | 75%      | 90%      | Maximum  |
|---------|----------|----------|----------|----------|----------|----------|----------|
| 50nM-NA | -0.36246 | -0.36246 | -0.03097 | 0.359837 | 0.962106 | 1.156949 | 1.156949 |
| 5nM-NA  | -0.67065 | -0.67065 | -0.66742 | -0.03056 | 0.088682 | 0.092123 | 0.092123 |
| -NA     | -2.09172 | -2.09172 | -1.77479 | -1.38901 | -0.6357  | -0.55303 | -0.55303 |
| 50nM+NA | -0.19477 | -0.19477 | -0.07372 | 0.273458 | 0.666224 | 1.44923  | 1.44923  |
| 5nM+NA  | -0.42559 | -0.42559 | 0.25038  | 0.659068 | 0.889905 | 0.933594 | 0.933594 |
| +NA     | -0.76487 | -0.76487 | -0.15373 | 0.31898  | 0.542044 | 0.729834 | 0.729834 |

**Oneway Anova**

**Summary of Fit**

|                            |          |
|----------------------------|----------|
| Rsquare                    | 0.625541 |
| Adj Rsquare                | 0.563131 |
| Root Mean Square Error     | 0.528324 |
| Mean of Response           | 2.78e-10 |
| Observations (or Sum Wgts) | 36       |

**Analysis of Variance**

| Source   | DF | Sum of Squares | Mean Square | F Ratio | Prob > F |
|----------|----|----------------|-------------|---------|----------|
| Label    | 5  | 13.988540      | 2.79771     | 10.0231 | <.0001 * |
| Error    | 30 | 8.373784       | 0.27913     |         |          |
| C. Total | 35 | 22.362323      |             |         |          |

**Means for Oneway Anova**

| Level   | Number | Mean    | Std Error | Lower 95% | Upper 95% |
|---------|--------|---------|-----------|-----------|-----------|
| 50nM-NA | 6      | 0.4151  | 0.21569   | -0.025    | 0.8556    |
| 5nM-NA  | 6      | -0.2031 | 0.21569   | -0.644    | 0.2374    |
| -NA     | 6      | -1.2925 | 0.21569   | -1.733    | -0.8520   |
| 50nM+NA | 6      | 0.3622  | 0.21569   | -0.078    | 0.8027    |
| 5nM+NA  | 6      | 0.5295  | 0.21569   | 0.089     | 0.9700    |
| +NA     | 6      | 0.1887  | 0.21569   | -0.252    | 0.6292    |

Std Error uses a pooled estimate of error variance

**Means Comparisons**

**Comparisons with a control using Dunnett's Method**

**Oneway Analysis of 1-Aminocyclopropanecarboxylic acid By Label**

**Means Comparisons**

**Comparisons with a control using Dunnett's Method**

Control Group = -NA

|         |       |
|---------|-------|
| d       | Alpha |
| 2.65691 | 0.05  |

| Level   | Abs(Dif)- |          |
|---------|-----------|----------|
|         | LSD       | p-Value  |
| 50nM-NA | 0.809     | <.0001 * |
| 5nM-NA  | 0.458     | 0.0001 * |
| 5nM+NA  | -0.44     | 0.9897   |
| -NA     | -0.53     | 1.0000   |
| 50nM+NA | -0.49     | 0.9998   |
| +NA     | 0.063     | 0.0240 * |

Positive values show pairs of means that are significantly different.

**Oneway Analysis of 1-Hexadecyl-2-arachidonoyl-glycerol By Label**

**Means Comparisons**

**Comparisons with a control using Dunnett's Method**

Control Group = -NA

|         |       |
|---------|-------|
| d       | Alpha |
| 2.65691 | 0.05  |

| Level   | Abs(Dif)- |          |
|---------|-----------|----------|
|         | LSD       | p-Value  |
| 50nM-NA | 0.124     | 0.0294 * |
| 5nM-NA  | -0.41     | 0.2364   |
| 50nM+NA | -0.76     | 0.6128   |
| 5nM+NA  | -0.92     | 0.8100   |
| +NA     | -1.26     | 0.9982   |
| -NA     | -1.42     | 1.0000   |

Positive values show pairs of means that are significantly different.

**Oneway Analysis of 1-Methyladenosine By Label**

**Means Comparisons**

**Comparisons with a control using Dunnett's Method**

Control Group = -NA

|            |              |
|------------|--------------|
| <b> d </b> | <b>Alpha</b> |
| 2.65691    | 0.05         |

| <b>Level</b> | <b>Abs(Dif)-</b> |                |
|--------------|------------------|----------------|
|              | <b>LSD</b>       | <b>p-Value</b> |
| 50nM-NA      | 0.073            | 0.0231 *       |
| 5nM-NA       | 0.049            | 0.0297 *       |
| 5nM+NA       | -0.57            | 1.0000         |
| -NA          | -0.58            | 1.0000         |
| 50nM+NA      | -0.53            | 0.9995         |
| +NA          | -0.31            | 0.6018         |

Positive values show pairs of means that are significantly different.

**Oneway Analysis of 1-Methyl-Histidine By Label**

**Means Comparisons**

**Comparisons with a control using Dunnett's Method**

Control Group = -NA

|            |              |
|------------|--------------|
| <b> d </b> | <b>Alpha</b> |
| 2.65691    | 0.05         |

| <b>Level</b> | <b>Abs(Dif)-</b> |                |
|--------------|------------------|----------------|
|              | <b>LSD</b>       | <b>p-Value</b> |
| 50nM-NA      | -0.13            | 0.1323         |
| 5nM-NA       | -0.18            | 0.1892         |
| -NA          | -0.75            | 1.0000         |
| 5nM+NA       | -0.5             | 0.8367         |
| 50nM+NA      | -0.4             | 0.6072         |
| +NA          | -0.35            | 0.4800         |

Positive values show pairs of means that are significantly different.

**Oneway Analysis of 2-Aminooctanoic acid By Label**

**Means Comparisons**

**Comparisons with a control using Dunnett's Method**

Control Group = -NA

|            |              |
|------------|--------------|
| <b> d </b> | <b>Alpha</b> |
| 2.65691    | 0.05         |

| <b>Level</b> | <b>Abs(Dif)-</b> |                |
|--------------|------------------|----------------|
|              | <b>LSD</b>       | <b>p-Value</b> |
| 50nM-NA      | 1.001            | <.0001 *       |
| 5nM-NA       | 0.677            | <.0001 *       |
| 5nM+NA       | -0.44            | 0.8529         |
| -NA          | -0.66            | 1.0000         |
| 50nM+NA      | -0.59            | 0.9992         |
| +NA          | -0.53            | 0.9806         |

Positive values show pairs of means that are significantly different.



|                                                               |
|---------------------------------------------------------------|
| <b>Oneway Analysis of 2-deoxyglucose-6-phosphate By Label</b> |
|---------------------------------------------------------------|

|                          |
|--------------------------|
| <b>Means Comparisons</b> |
|--------------------------|

|                                                          |
|----------------------------------------------------------|
| <b>Comparisons with a control using Dunnett's Method</b> |
|----------------------------------------------------------|

Control Group = -NA

|            |              |
|------------|--------------|
| <b> d </b> | <b>Alpha</b> |
| 2.65691    | 0.05         |

| <b>Level</b> | <b>Abs(Dif)-<br/>LSD</b> | <b>p-Value</b> |
|--------------|--------------------------|----------------|
| -NA          | -0.7                     | 1.0000         |
| 50nM-NA      | -0.62                    | 0.9980         |
| 5nM-NA       | -0.38                    | 0.6272         |
| +NA          | 1.802                    | <.0001 *       |
| 50nM+NA      | 1.84                     | <.0001 *       |
| 5nM+NA       | 1.85                     | <.0001 *       |

Positive values show pairs of means that are significantly different.

**Oneway Analysis of 2-Hydroxy-2-methylbutanedioic acid By Label****Means Comparisons****Comparisons with a control using Dunnett's Method**

Control Group = -NA

|         |       |
|---------|-------|
| d       | Alpha |
| 2.65691 | 0.05  |

| Level   | Abs(Dif)- |         |
|---------|-----------|---------|
|         | LSD       | p-Value |
| 5nM-NA  | -0.41     | 0.3081  |
| 50nM+NA | -0.85     | 0.9126  |
| 5nM+NA  | -1.04     | 0.9975  |
| +NA     | -1.07     | 0.9993  |
| -NA     | -1.18     | 1.0000  |
| 50nM-NA | -0.97     | 0.9865  |

Positive values show pairs of means that are significantly different.

**Oneway Analysis of 2-hydroxyglutarate By Label**

**Means Comparisons**

**Comparisons with a control using Dunnett's Method**

Control Group = -NA

|            |              |
|------------|--------------|
| <b> d </b> | <b>Alpha</b> |
| 2.65691    | 0.05         |

| <b>Level</b> | <b>Abs(Dif)-<br/>LSD</b> | <b>p-Value</b> |
|--------------|--------------------------|----------------|
| -NA          | -0.95                    | 1.0000         |
| 50nM+NA      | -0.18                    | 0.1405         |
| 5nM+NA       | 0.23                     | 0.0107 *       |
| +NA          | 0.342                    | 0.0048 *       |
| 5nM-NA       | 0.86                     | <.0001 *       |
| 50nM-NA      | 1.176                    | <.0001 *       |

Positive values show pairs of means that are significantly different.

**Oneway Analysis of 2-Isopropylmalic acid By Label**

**Means Comparisons**

**Comparisons with a control using Dunnett's Method**

Control Group = -NA

|            |              |
|------------|--------------|
| <b> d </b> | <b>Alpha</b> |
| 2.65691    | 0.05         |

| <b>Level</b> | <b>Abs(Dif)-</b> |                |
|--------------|------------------|----------------|
|              | <b>LSD</b>       | <b>p-Value</b> |
| 50nM+NA      | -0.25            | 0.1672         |
| 5nM+NA       | -0.52            | 0.4889         |
| 50nM-NA      | -0.95            | 0.9937         |
| +NA          | -1.04            | 0.9998         |
| 5nM-NA       | -1.11            | 1.0000         |
| -NA          | -1.12            | 1.0000         |

Positive values show pairs of means that are significantly different.

**Oneway Analysis of 2-keto-isovalerate By Label**

**Means Comparisons**

**Comparisons with a control using Dunnett's Method**

Control Group = -NA

|            |              |
|------------|--------------|
| <b> d </b> | <b>Alpha</b> |
| 2.65691    | 0.05         |

| <b>Level</b> | <b>Abs(Dif)-</b> |                |
|--------------|------------------|----------------|
|              | <b>LSD</b>       | <b>p-Value</b> |
| 50nM-NA      | 1.058            | <.0001 *       |
| 5nM-NA       | 0.114            | 0.0075 *       |
| -NA          | -0.38            | 1.0000         |
| +NA          | -0.31            | 0.9767         |
| 5nM+NA       | -0.2             | 0.5992         |
| 50nM+NA      | -0.04            | 0.0968         |

Positive values show pairs of means that are significantly different.

**Oneway Analysis of 2-oxobutanoate By Label**

**Means Comparisons**

**Comparisons with a control using Dunnett's Method**

Control Group = -NA

|            |              |
|------------|--------------|
| <b> d </b> | <b>Alpha</b> |
| 2.65691    | 0.05         |

| <b>Level</b> | <b>Abs(Dif)-</b> |                |
|--------------|------------------|----------------|
|              | <b>LSD</b>       | <b>p-Value</b> |
| 5nM+NA       | -0.55            | 0.8447         |
| 50nM-NA      | -0.6             | 0.9205         |
| -NA          | -0.83            | 1.0000         |
| 50nM+NA      | -0.81            | 1.0000         |
| +NA          | -0.79            | 1.0000         |
| 5nM-NA       | -0.78            | 0.9999         |

Positive values show pairs of means that are significantly different.

**Oneway Analysis of 3-phospho-serine By Label**

**Means Comparisons**

**Comparisons with a control using Dunnett's Method**

Control Group = -NA

|         |       |
|---------|-------|
| d       | Alpha |
| 2.65691 | 0.05  |

| Level   | Abs(Dif)- |          |
|---------|-----------|----------|
|         | LSD       | p-Value  |
| 5nM-NA  | 0.282     | 0.0067 * |
| 50nM-NA | 0.227     | 0.0101 * |
| 5nM+NA  | -0.3      | 0.2912   |
| +NA     | -0.47     | 0.5814   |
| 50nM+NA | -0.49     | 0.6400   |
| -NA     | -0.9      | 1.0000   |

Positive values show pairs of means that are significantly different.

**Oneway Analysis of 4-aminobutyrate By Label**

**Means Comparisons**

**Comparisons with a control using Dunnett's Method**

Control Group = -NA

|            |              |
|------------|--------------|
| <b> d </b> | <b>Alpha</b> |
| 2.65691    | 0.05         |

| <b>Level</b> | <b>Abs(Dif)-</b> |                |
|--------------|------------------|----------------|
|              | <b>LSD</b>       | <b>p-Value</b> |
| -NA          | -0.95            | 1.0000         |
| 50nM-NA      | -0.75            | 0.9747         |
| 5nM-NA       | -0.49            | 0.5794         |
| 5nM+NA       | -0.44            | 0.4886         |
| 50nM+NA      | -0.36            | 0.3581         |
| +NA          | 0.1              | 0.0261 *       |

Positive values show pairs of means that are significantly different.



**Oneway Analysis of 4-Aminomethylpyrimidine By Label**

**Means Comparisons**

**Comparisons with a control using Dunnett's Method**

Control Group = -NA

|            |              |
|------------|--------------|
| <b> d </b> | <b>Alpha</b> |
| 2.65691    | 0.05         |

| <b>Level</b> | <b>Abs(Dif)-</b> |                |
|--------------|------------------|----------------|
|              | <b>LSD</b>       | <b>p-Value</b> |
| 50nM-NA      | 2.906            | <.0001 *       |
| 5nM-NA       | 2.215            | <.0001 *       |
| 5nM+NA       | -0.82            | 0.9853         |
| -NA          | -0.99            | 1.0000         |
| 50nM+NA      | -0.89            | 0.9989         |
| +NA          | 0.396            | 0.0037 *       |

Positive values show pairs of means that are significantly different.

**Oneway Analysis of 4-Pyridoxic acid By Label**

**Means Comparisons**

**Comparisons with a control using Dunnett's Method**

Control Group = -NA

|            |              |
|------------|--------------|
| <b> d </b> | <b>Alpha</b> |
| 2.65691    | 0.05         |

| <b>Level</b> | <b>Abs(Dif)-</b> |                |
|--------------|------------------|----------------|
|              | <b>LSD</b>       | <b>p-Value</b> |
| 5nM-NA       | -1.31            | 0.9999         |
| +NA          | -1.34            | 1.0000         |
| -NA          | -1.39            | 1.0000         |
| 50nM-NA      | -1.23            | 0.9980         |
| 50nM+NA      | -1.17            | 0.9901         |
| 5nM+NA       | -1.15            | 0.9861         |

Positive values show pairs of means that are significantly different.

|                                                                          |
|--------------------------------------------------------------------------|
| <b>Oneway Analysis of 5,6-Dihydroxyindole-2-carboxylic acid By Label</b> |
|--------------------------------------------------------------------------|

|                          |
|--------------------------|
| <b>Means Comparisons</b> |
|--------------------------|

|                                                          |
|----------------------------------------------------------|
| <b>Comparisons with a control using Dunnett's Method</b> |
|----------------------------------------------------------|

Control Group = -NA

|            |              |
|------------|--------------|
| <b> d </b> | <b>Alpha</b> |
| 2.65691    | 0.05         |

| <b>Level</b> | <b>Abs(Dif)-</b> |                |
|--------------|------------------|----------------|
|              | <b>LSD</b>       | <b>p-Value</b> |
| 50nM-NA      | 5.988            | <.0001 *       |
| 50nM+NA      | 4.248            | <.0001 *       |
| 5nM-NA       | 1.672            | <.0001 *       |
| 5nM+NA       | 1.488            | <.0001 *       |
| -NA          | -0.57            | 1.0000         |
| +NA          | -0.39            | 0.8765         |

Positive values show pairs of means that are significantly different.

**Oneway Analysis of 7-methylguanosine By Label**

**Means Comparisons**

**Comparisons with a control using Dunnett's Method**

Control Group = -NA

|            |              |
|------------|--------------|
| <b> d </b> | <b>Alpha</b> |
| 2.65691    | 0.05         |

| <b>Level</b> | <b>Abs(Dif)-</b> |                |
|--------------|------------------|----------------|
|              | <b>LSD</b>       | <b>p-Value</b> |
| 5nM-NA       | -0.46            | 0.8820         |
| 50nM-NA      | -0.6             | 0.9993         |
| -NA          | -0.66            | 1.0000         |
| 50nM+NA      | -0.33            | 0.5515         |
| 5nM+NA       | -0.22            | 0.2856         |
| +NA          | 0.017            | 0.0430 *       |

Positive values show pairs of means that are significantly different.

**Oneway Analysis of acetoacetate By Label**

**Means Comparisons**

**Comparisons with a control using Dunnett's Method**

Control Group = -NA

|         |       |
|---------|-------|
| d       | Alpha |
| 2.65691 | 0.05  |

| Level   | Abs(Dif)- |          |
|---------|-----------|----------|
|         | LSD       | p-Value  |
| 5nM+NA  | 0.445     | 0.0016 * |
| +NA     | -0.03     | 0.0623   |
| 50nM+NA | -0.25     | 0.2310   |
| -NA     | -0.87     | 1.0000   |
| 50nM-NA | -0.56     | 0.8171   |
| 5nM-NA  | -0.25     | 0.2299   |

Positive values show pairs of means that are significantly different.

**Oneway Analysis of acetoacetyl-CoA By Label**

**Means Comparisons**

**Comparisons with a control using Dunnett's Method**

Control Group = -NA

|         |       |
|---------|-------|
| d       | Alpha |
| 2.65691 | 0.05  |

| Level   | Abs(Dif)- |          |
|---------|-----------|----------|
|         | LSD       | p-Value  |
| 50nM-NA | -0.34     | 0.5678   |
| 5nM-NA  | -0.46     | 0.8633   |
| -NA     | -0.67     | 1.0000   |
| +NA     | 1.11      | <.0001 * |
| 5nM+NA  | 1.12      | <.0001 * |
| 50nM+NA | 1.286     | <.0001 * |

Positive values show pairs of means that are significantly different.

**Oneway Analysis of Acetylcarnitine By Label**

**Means Comparisons**

**Comparisons with a control using Dunnett's Method**

Control Group = -NA

|            |              |
|------------|--------------|
| <b> d </b> | <b>Alpha</b> |
| 2.65691    | 0.05         |

| <b>Level</b> | <b>Abs(Dif)-<br/>LSD</b> | <b>p-Value</b> |
|--------------|--------------------------|----------------|
| 50nM-NA      | 1.798                    | <.0001 *       |
| 5nM-NA       | 0.806                    | <.0001 *       |
| 50nM+NA      | -0.38                    | 0.9777         |
| 5nM+NA       | -0.39                    | 0.9850         |
| -NA          | -0.48                    | 1.0000         |
| +NA          | -0.2                     | 0.4155         |

Positive values show pairs of means that are significantly different.

**Oneway Analysis of Acetylcholine By Label**

**Means Comparisons**

**Comparisons with a control using Dunnett's Method**

Control Group = -NA

|d|      Alpha  
2.65691      0.05

| Level   | Abs(Dif)- |          |
|---------|-----------|----------|
|         | LSD       | p-Value  |
| -NA     | -0.8      | 1.0000   |
| 5nM-NA  | -0.61     | 0.9528   |
| 50nM-NA | -0.58     | 0.9144   |
| 5nM+NA  | 0.13      | 0.0183 * |
| +NA     | 0.181     | 0.0121 * |
| 50nM+NA | 1.14      | <.0001 * |

Positive values show pairs of means that are significantly different.



**Oneway Analysis of acetyl-CoA By Label**

**Means Comparisons**

**Comparisons with a control using Dunnett's Method**

Control Group = -NA

|            |              |
|------------|--------------|
| <b> d </b> | <b>Alpha</b> |
| 2.65691    | 0.05         |

| <b>Level</b> | <b>Abs(Dif)-</b> |                |
|--------------|------------------|----------------|
|              | <b>LSD</b>       | <b>p-Value</b> |
| 50nM-NA      | 0.609            | 0.0004 *       |
| 5nM-NA       | -0.29            | 0.2831         |
| -NA          | -0.86            | 1.0000         |
| 5nM+NA       | -0.78            | 0.9993         |
| 50nM+NA      | -0.57            | 0.8331         |
| +NA          | -0.39            | 0.4646         |

Positive values show pairs of means that are significantly different.

**Oneway Analysis of Acetyllysine By Label**

**Means Comparisons**

**Comparisons with a control using Dunnett's Method**

Control Group = -NA

|            |              |
|------------|--------------|
| <b> d </b> | <b>Alpha</b> |
| 2.65691    | 0.05         |

| <b>Level</b> | <b>Abs(Dif)-</b> |                |
|--------------|------------------|----------------|
|              | <b>LSD</b>       | <b>p-Value</b> |
| 50nM-NA      | 0.259            | 0.0021 *       |
| 5nM-NA       | 0.233            | 0.0030 *       |
| -NA          | -0.54            | 1.0000         |
| 50nM+NA      | -0.28            | 0.5637         |
| 5nM+NA       | -0.25            | 0.4790         |
| +NA          | 0.053            | 0.0276 *       |

Positive values show pairs of means that are significantly different.

**Oneway Analysis of acetylphosphate By Label**

**Means Comparisons**

**Comparisons with a control using Dunnett's Method**

Control Group = -NA

|            |              |
|------------|--------------|
| <b> d </b> | <b>Alpha</b> |
| 2.65691    | 0.05         |

| <b>Level</b> | <b>Abs(Dif)-</b> |                |
|--------------|------------------|----------------|
|              | <b>LSD</b>       | <b>p-Value</b> |
| 50nM+NA      | -0.21            | 0.1377         |
| 5nM+NA       | -0.3             | 0.2018         |
| +NA          | -0.42            | 0.3314         |
| 5nM-NA       | -0.48            | 0.3998         |
| 50nM-NA      | -0.56            | 0.5198         |
| -NA          | -1.15            | 1.0000         |

Positive values show pairs of means that are significantly different.

**Oneway Analysis of adenine By Label**

**Means Comparisons**

**Comparisons with a control using Dunnett's Method**

Control Group = -NA

|         |       |
|---------|-------|
| d       | Alpha |
| 2.65691 | 0.05  |

| Level   | Abs(Dif)- |          |
|---------|-----------|----------|
|         | LSD       | p-Value  |
| 50nM-NA | 0.77      | <.0001 * |
| 5nM-NA  | 0.516     | <.0001 * |
| 5nM+NA  | -0.47     | 0.9956   |
| +NA     | -0.51     | 0.9999   |
| 50nM+NA | -0.53     | 1.0000   |
| -NA     | -0.55     | 1.0000   |

Positive values show pairs of means that are significantly different.

**Oneway Analysis of adenosine By Label**

**Means Comparisons**

**Comparisons with a control using Dunnett's Method**

Control Group = -NA

|            |              |
|------------|--------------|
| <b> d </b> | <b>Alpha</b> |
| 2.65691    | 0.05         |

| <b>Level</b> | <b>Abs(Dif)-</b> |                |
|--------------|------------------|----------------|
|              | <b>LSD</b>       | <b>p-Value</b> |
| 50nM-NA      | 0.711            | 0.0011 *       |
| 5nM-NA       | 0.432            | 0.0054 *       |
| -NA          | -1.26            | 1.0000         |
| 5nM+NA       | -1.05            | 0.9907         |
| 50nM+NA      | -1.01            | 0.9793         |
| +NA          | -0.7             | 0.6539         |

Positive values show pairs of means that are significantly different.

**Oneway Analysis of Adipic acid By Label**

**Means Comparisons**

**Comparisons with a control using Dunnett's Method**

Control Group = -NA

|            |              |
|------------|--------------|
| <b> d </b> | <b>Alpha</b> |
| 2.65691    | 0.05         |

| <b>Level</b> | <b>Abs(Dif)-<br/>LSD</b> | <b>p-Value</b> |
|--------------|--------------------------|----------------|
| -NA          | -0.59                    | 1.0000         |
| 5nM-NA       | -0.19                    | 0.2761         |
| +NA          | 0.079                    | 0.0217 *       |
| 5nM+NA       | 0.143                    | 0.0107 *       |
| 50nM-NA      | 0.143                    | 0.0107 *       |
| 50nM+NA      | 0.303                    | 0.0016 *       |

Positive values show pairs of means that are significantly different.

**Oneway Analysis of ADP By Label**

**Means Comparisons**

**Comparisons with a control using Dunnett's Method**

Control Group = -NA

|            |              |
|------------|--------------|
| <b> d </b> | <b>Alpha</b> |
| 2.65691    | 0.05         |

| <b>Level</b> | <b>Abs(Dif)-</b> |                |
|--------------|------------------|----------------|
|              | <b>LSD</b>       | <b>p-Value</b> |
| 50nM-NA      | 0.378            | 0.0010 *       |
| 5nM-NA       | 0.308            | 0.0022 *       |
| 50nM+NA      | -0.51            | 0.9644         |
| 5nM+NA       | -0.64            | 1.0000         |
| -NA          | -0.66            | 1.0000         |
| +NA          | -0.65            | 1.0000         |

Positive values show pairs of means that are significantly different.

**Oneway Analysis of AICAR 3,5-Cyclic Phosphate By Label**

**Means Comparisons**

**Comparisons with a control using Dunnett's Method**

Control Group = -NA

|            |              |
|------------|--------------|
| <b> d </b> | <b>Alpha</b> |
| 2.65691    | 0.05         |

| <b>Level</b> | <b>Abs(Dif)-</b> |                |
|--------------|------------------|----------------|
|              | <b>LSD</b>       | <b>p-Value</b> |
| 50nM-NA      | 0.934            | <.0001 *       |
| 5nM-NA       | 0.319            | <.0001 *       |
| -NA          | -0.24            | 1.0000         |
| 5nM+NA       | -0.23            | 1.0000         |
| 50nM+NA      | -0.2             | 0.9834         |
| +NA          | -0.18            | 0.9565         |

Positive values show pairs of means that are significantly different.



**Oneway Analysis of AICAR(ZMP) By Label**

**Means Comparisons**

**Comparisons with a control using Dunnett's Method**

Control Group = -NA

|            |              |
|------------|--------------|
| <b> d </b> | <b>Alpha</b> |
| 2.65691    | 0.05         |

| <b>Level</b> | <b>Abs(Dif)-</b> |                |
|--------------|------------------|----------------|
|              | <b>LSD</b>       | <b>p-Value</b> |
| 5nM-NA       | 0.773            | <.0001 *       |
| 50nM-NA      | -0.1             | 0.8203         |
| +NA          | -0.13            | 0.9983         |
| 5nM+NA       | -0.14            | 0.9999         |
| -NA          | -0.15            | 1.0000         |
| 50nM+NA      | -0.13            | 0.9988         |

Positive values show pairs of means that are significantly different.

**Oneway Analysis of 2-ketoglutarate By Label**

**Means Comparisons**

**Comparisons with a control using Dunnett's Method**

Control Group = -NA

|            |              |
|------------|--------------|
| <b> d </b> | <b>Alpha</b> |
| 2.65691    | 0.05         |

| <b>Level</b> | <b>Abs(Dif)-<br/>LSD</b> | <b>p-Value</b> |
|--------------|--------------------------|----------------|
| -NA          | -1.09                    | 1.0000         |
| 5nM+NA       | -1.09                    | 1.0000         |
| +NA          | -1.08                    | 1.0000         |
| 5nM-NA       | -0.85                    | 0.9655         |
| 50nM-NA      | -0.68                    | 0.7719         |
| 50nM+NA      | -0.52                    | 0.5033         |

Positive values show pairs of means that are significantly different.

**Oneway Analysis of Ala-Ala By Label****Means Comparisons****Comparisons with a control using Dunnett's Method**

Control Group = -NA

|            |              |
|------------|--------------|
| <b> d </b> | <b>Alpha</b> |
| 2.65691    | 0.05         |

| <b>Level</b> | <b>Abs(Dif)-<br/>LSD</b> | <b>p-Value</b> |
|--------------|--------------------------|----------------|
| 50nM-NA      | -0.36                    | 0.9980         |
| -NA          | -0.41                    | 1.0000         |
| 5nM-NA       | -0.27                    | 0.8337         |
| 5nM+NA       | -0.16                    | 0.3755         |
| 50nM+NA      | -0.16                    | 0.3754         |
| +NA          | -0.16                    | 0.3754         |

Positive values show pairs of means that are significantly different.

**Oneway Analysis of Ala-Gln By Label**

**Means Comparisons**

**Comparisons with a control using Dunnett's Method**

Control Group = -NA

|d|      Alpha  
2.65691      0.05

| Level   | Abs(Dif)- |          |
|---------|-----------|----------|
|         | LSD       | p-Value  |
| 5nM-NA  | -0.18     | 0.5120   |
| -NA     | -0.38     | 1.0000   |
| 50nM-NA | -0.29     | 0.9445   |
| 5nM+NA  | 0.012     | 0.0414 * |
| +NA     | 0.223     | 0.0010 * |
| 50nM+NA | 0.389     | <.0001 * |

Positive values show pairs of means that are significantly different.

**Oneway Analysis of Ala-Gly By Label**

**Means Comparisons**

**Comparisons with a control using Dunnett's Method**

Control Group = -NA

|            |              |
|------------|--------------|
| <b> d </b> | <b>Alpha</b> |
| 2.65691    | 0.05         |

| <b>Level</b> | <b>Abs(Dif)-</b> |                |
|--------------|------------------|----------------|
|              | <b>LSD</b>       | <b>p-Value</b> |
| 50nM+NA      | -0.28            | 0.2722         |
| 5nM+NA       | -0.52            | 0.7236         |
| 5nM-NA       | -0.59            | 0.8559         |
| 50nM-NA      | -0.61            | 0.8878         |
| -NA          | -0.88            | 1.0000         |
| +NA          | -0.73            | 0.9881         |

Positive values show pairs of means that are significantly different.

**Oneway Analysis of alanine By Label**

**Means Comparisons**

**Comparisons with a control using Dunnett's Method**

Control Group = -NA

|         |       |
|---------|-------|
| d       | Alpha |
| 2.65691 | 0.05  |

| Level   | Abs(Dif)- |          |
|---------|-----------|----------|
|         | LSD       | p-Value  |
| -NA     | -0.87     | 1.0000   |
| 5nM-NA  | 0.35      | 0.0036 * |
| 50nM-NA | 0.56      | 0.0006 * |
| 5nM+NA  | 0.754     | 0.0001 * |
| 50nM+NA | 0.856     | <.0001 * |
| +NA     | 0.876     | <.0001 * |

Positive values show pairs of means that are significantly different.

**Oneway Analysis of allantoate By Label**

**Means Comparisons**

**Comparisons with a control using Dunnett's Method**

Control Group = -NA

|         |       |
|---------|-------|
| d       | Alpha |
| 2.65691 | 0.05  |

| Level   | Abs(Dif)-<br>LSD | p-Value  |
|---------|------------------|----------|
| -NA     | -1.15            | 1.0000   |
| 50nM+NA | -1.1             | 1.0000   |
| 5nM+NA  | -0.98            | 0.9940   |
| +NA     | -0.14            | 0.1000   |
| 5nM-NA  | 1.607            | <.0001 * |
| 50nM-NA | 1.898            | <.0001 * |

Positive values show pairs of means that are significantly different.

**Oneway Analysis of Aminoadipic acid By Label**

**Means Comparisons**

**Comparisons with a control using Dunnett's Method**

Control Group = -NA

|d|      Alpha  
2.65691      0.05

| Level   | Abs(Dif)-<br>LSD | p-Value  |
|---------|------------------|----------|
| -NA     | -1.04            | 1.0000   |
| 50nM+NA | 0.284            | 0.0087 * |
| +NA     | 0.435            | 0.0032 * |
| 5nM+NA  | 0.563            | 0.0013 * |
| 5nM-NA  | 0.597            | 0.0010 * |
| 50nM-NA | 1.341            | <.0001 * |

Positive values show pairs of means that are significantly different.



**Oneway Analysis of AMP By Label**

**Means Comparisons**

**Comparisons with a control using Dunnett's Method**

Control Group = -NA

|            |              |
|------------|--------------|
| <b> d </b> | <b>Alpha</b> |
| 2.65691    | 0.05         |

| <b>Level</b> | <b>Abs(Dif)-</b> |                |
|--------------|------------------|----------------|
|              | <b>LSD</b>       | <b>p-Value</b> |
| 50nM-NA      | 2.061            | <.0001 *       |
| 5nM-NA       | 1.155            | <.0001 *       |
| -NA          | -0.26            | 1.0000         |
| 50nM+NA      | -0.25            | 1.0000         |
| +NA          | -0.17            | 0.8309         |
| 5nM+NA       | -0.15            | 0.7198         |

Positive values show pairs of means that are significantly different.

|                                             |
|---------------------------------------------|
| <b>Oneway Analysis of Arabitol By Label</b> |
|---------------------------------------------|

|                          |
|--------------------------|
| <b>Means Comparisons</b> |
|--------------------------|

|                                                          |
|----------------------------------------------------------|
| <b>Comparisons with a control using Dunnett's Method</b> |
|----------------------------------------------------------|

Control Group = -NA

|            |              |
|------------|--------------|
| <b> d </b> | <b>Alpha</b> |
| 2.65691    | 0.05         |

| <b>Level</b> | <b>Abs(Dif)-<br/>LSD</b> | <b>p-Value</b> |
|--------------|--------------------------|----------------|
| 5nM-NA       | -1.41                    | 0.4534         |
| 50nM-NA      | -2.49                    | 0.9692         |
| +NA          | -2.65                    | 0.9901         |
| 50nM+NA      | -2.68                    | 0.9923         |
| 5nM+NA       | -2.71                    | 0.9946         |
| -NA          | -3.17                    | 1.0000         |

Positive values show pairs of means that are significantly different.

**Oneway Analysis of arginine By Label**

**Means Comparisons**

**Comparisons with a control using Dunnett's Method**

Control Group = -NA

|            |              |
|------------|--------------|
| <b> d </b> | <b>Alpha</b> |
| 2.65691    | 0.05         |

| <b>Level</b> | <b>Abs(Dif)-</b> |                |
|--------------|------------------|----------------|
|              | <b>LSD</b>       | <b>p-Value</b> |
| 50nM-NA      | 0.521            | 0.0002 *       |
| 5nM-NA       | -0.27            | 0.3973         |
| -NA          | -0.66            | 1.0000         |
| 5nM+NA       | -0.47            | 0.9065         |
| 50nM+NA      | -0.35            | 0.6088         |
| +NA          | -0.35            | 0.5940         |

Positive values show pairs of means that are significantly different.

**Oneway Analysis of asparagine By Label**

**Means Comparisons**

**Comparisons with a control using Dunnett's Method**

Control Group = -NA

|         |       |
|---------|-------|
| d       | Alpha |
| 2.65691 | 0.05  |

| Level   | Abs(Dif)- |          |
|---------|-----------|----------|
|         | LSD       | p-Value  |
| -NA     | -1.05     | 1.0000   |
| 50nM-NA | 0.133     | 0.0229 * |
| 5nM-NA  | 0.186     | 0.0166 * |
| 50nM+NA | 0.91      | 0.0001 * |
| 5nM+NA  | 0.937     | 0.0001 * |
| +NA     | 0.966     | <.0001 * |

Positive values show pairs of means that are significantly different.

|                                              |
|----------------------------------------------|
| <b>Oneway Analysis of aspartate By Label</b> |
|----------------------------------------------|

|                          |
|--------------------------|
| <b>Means Comparisons</b> |
|--------------------------|

|                                                          |
|----------------------------------------------------------|
| <b>Comparisons with a control using Dunnett's Method</b> |
|----------------------------------------------------------|

Control Group = -NA

|            |              |
|------------|--------------|
| <b> d </b> | <b>Alpha</b> |
| 2.65691    | 0.05         |

| <b>Level</b> | <b>Abs(Dif)-</b> |                |
|--------------|------------------|----------------|
|              | <b>LSD</b>       | <b>p-Value</b> |
| 50nM-NA      | 1.575            | <.0001 *       |
| 5nM-NA       | 0.54             | <.0001 *       |
| -NA          | -0.23            | 1.0000         |
| +NA          | 0.103            | 0.0025 *       |
| 50nM+NA      | 0.107            | 0.0021 *       |
| 5nM+NA       | 0.134            | 0.0009 *       |

Positive values show pairs of means that are significantly different.

**Oneway Analysis of ATP By Label**

**Means Comparisons**

**Comparisons with a control using Dunnett's Method**

Control Group = -NA

|            |              |
|------------|--------------|
| <b> d </b> | <b>Alpha</b> |
| 2.65691    | 0.05         |

| <b>Level</b> | <b>Abs(Dif)-<br/>LSD</b> | <b>p-Value</b> |
|--------------|--------------------------|----------------|
| -NA          | -0.93                    | 1.0000         |
| +NA          | -0.93                    | 1.0000         |
| 5nM+NA       | -0.81                    | 0.9968         |
| 50nM+NA      | -0.66                    | 0.8981         |
| 5nM-NA       | -0.39                    | 0.4176         |
| 50nM-NA      | 1.246                    | <.0001 *       |

Positive values show pairs of means that are significantly different.

**Oneway Analysis of benzenesulfonamine By Label**

**Means Comparisons**

**Comparisons with a control using Dunnett's Method**

Control Group = -NA

|            |              |
|------------|--------------|
| <b> d </b> | <b>Alpha</b> |
| 2.65691    | 0.05         |

| <b>Level</b> | <b>Abs(Dif)-</b> |                |
|--------------|------------------|----------------|
|              | <b>LSD</b>       | <b>p-Value</b> |
| 50nM-NA      | 1.707            | <.0001 *       |
| 50nM+NA      | 1.209            | <.0001 *       |
| 5nM-NA       | 0.004            | 0.0454 *       |
| 5nM+NA       | -0.04            | 0.1314         |
| -NA          | -0.22            | 1.0000         |
| +NA          | -0.21            | 1.0000         |

Positive values show pairs of means that are significantly different.

**Oneway Analysis of Benzoic acid By Label**

**Means Comparisons**

**Comparisons with a control using Dunnett's Method**

Control Group = -NA

|            |              |
|------------|--------------|
| <b> d </b> | <b>Alpha</b> |
| 2.65691    | 0.05         |

| <b>Level</b> | <b>Abs(Dif)-</b> |                |
|--------------|------------------|----------------|
|              | <b>LSD</b>       | <b>p-Value</b> |
| 50nM-NA      | -0.55            | 0.2655         |
| 5nM-NA       | -0.98            | 0.6769         |
| +NA          | -1.03            | 0.7220         |
| 5nM+NA       | -1.43            | 0.9881         |
| -NA          | -1.73            | 1.0000         |
| 50nM+NA      | -1.61            | 0.9998         |

Positive values show pairs of means that are significantly different.



**Oneway Analysis of beta-Alanine By Label**

**Means Comparisons**

**Comparisons with a control using Dunnett's Method**

Control Group = -NA

|            |              |
|------------|--------------|
| <b> d </b> | <b>Alpha</b> |
| 2.65691    | 0.05         |

| <b>Level</b> | <b>Abs(Dif)-<br/>LSD</b> | <b>p-Value</b> |
|--------------|--------------------------|----------------|
| -NA          | -0.2                     | 1.0000         |
| +NA          | -0.18                    | 0.9994         |
| 50nM-NA      | -0.18                    | 0.9989         |
| 50nM+NA      | -0.17                    | 0.9911         |
| 5nM+NA       | -0.13                    | 0.8028         |
| 5nM-NA       | -0.02                    | 0.0888         |

Positive values show pairs of means that are significantly different.

**Oneway Analysis of beta-D-Glucopyranose By Label**

**Means Comparisons**

**Comparisons with a control using Dunnett's Method**

Control Group = -NA

|            |              |
|------------|--------------|
| <b> d </b> | <b>Alpha</b> |
| 2.65691    | 0.05         |

| <b>Level</b> | <b>Abs(Dif)-<br/>LSD</b> | <b>p-Value</b> |
|--------------|--------------------------|----------------|
| -NA          | -0.56                    | 1.0000         |
| 5nM-NA       | 0.078                    | 0.0211 *       |
| 5nM+NA       | 0.202                    | 0.0048 *       |
| 50nM-NA      | 0.273                    | 0.0019 *       |
| +NA          | 0.287                    | 0.0016 *       |
| 50nM+NA      | 0.359                    | 0.0006 *       |

Positive values show pairs of means that are significantly different.

**Oneway Analysis of betaine By Label**

**Means Comparisons**

**Comparisons with a control using Dunnett's Method**

Control Group = -NA

|            |              |
|------------|--------------|
| <b> d </b> | <b>Alpha</b> |
| 2.65691    | 0.05         |

| <b>Level</b> | <b>Abs(Dif)-</b> |                |
|--------------|------------------|----------------|
|              | <b>LSD</b>       | <b>p-Value</b> |
| 5nM-NA       | 0.002            | 0.0494 *       |
| +NA          | -0.53            | 0.7870         |
| 50nM-NA      | -0.57            | 0.8722         |
| 5nM+NA       | -0.67            | 0.9785         |
| -NA          | -0.84            | 1.0000         |
| 50nM+NA      | -0.83            | 1.0000         |

Positive values show pairs of means that are significantly different.

**Oneway Analysis of betaine aldehyde By Label**

**Means Comparisons**

**Comparisons with a control using Dunnett's Method**

Control Group = -NA

|d|      Alpha  
2.65691      0.05

| Level   | Abs(Dif)- |          |
|---------|-----------|----------|
|         | LSD       | p-Value  |
| 5nM+NA  | 0.547     | 0.0056 * |
| +NA     | -0.48     | 0.2467   |
| 50nM+NA | -0.75     | 0.4841   |
| 5nM-NA  | -1.57     | 1.0000   |
| -NA     | -1.62     | 1.0000   |
| 50nM-NA | -1.2      | 0.9377   |

Positive values show pairs of means that are significantly different.

**Oneway Analysis of Butyrylcarnitine By Label**

**Means Comparisons**

**Comparisons with a control using Dunnett's Method**

Control Group = -NA

|            |              |
|------------|--------------|
| <b> d </b> | <b>Alpha</b> |
| 2.65691    | 0.05         |

| <b>Level</b> | <b>Abs(Dif)-</b> |                |
|--------------|------------------|----------------|
|              | <b>LSD</b>       | <b>p-Value</b> |
| 50nM+NA      | -0.36            | 1.0000         |
| -NA          | -0.36            | 1.0000         |
| +NA          | -0.24            | 0.8458         |
| 5nM+NA       | -0.1             | 0.2229         |
| 5nM-NA       | 1.103            | <.0001 *       |
| 50nM-NA      | 1.658            | <.0001 *       |

Positive values show pairs of means that are significantly different.

**Oneway Analysis of Carbamoyl phosphate By Label**

**Means Comparisons**

**Comparisons with a control using Dunnett's Method**

Control Group = -NA

|            |              |
|------------|--------------|
| <b> d </b> | <b>Alpha</b> |
| 2.65691    | 0.05         |

| <b>Level</b> | <b>Abs(Dif)-</b> |                |
|--------------|------------------|----------------|
|              | <b>LSD</b>       | <b>p-Value</b> |
| 5nM-NA       | -0.71            | 0.4865         |
| 50nM+NA      | -0.77            | 0.5582         |
| 5nM+NA       | -1.01            | 0.8358         |
| 50nM-NA      | -1.41            | 0.9998         |
| -NA          | -1.52            | 1.0000         |
| +NA          | -0.97            | 0.7952         |

Positive values show pairs of means that are significantly different.

**Oneway Analysis of Carnitine By Label**

**Means Comparisons**

**Comparisons with a control using Dunnett's Method**

Control Group = -NA

|            |              |
|------------|--------------|
| <b> d </b> | <b>Alpha</b> |
| 2.65691    | 0.05         |

| <b>Level</b> | <b>Abs(Dif)-<br/>LSD</b> | <b>p-Value</b> |
|--------------|--------------------------|----------------|
| -NA          | -0.77                    | 1.0000         |
| 5nM-NA       | -0.31                    | 0.3770         |
| +NA          | 0.278                    | 0.0049 *       |
| 50nM+NA      | 0.348                    | 0.0026 *       |
| 5nM+NA       | 0.71                     | <.0001 *       |
| 50nM-NA      | 0.982                    | <.0001 *       |

Positive values show pairs of means that are significantly different.

**Oneway Analysis of CDP By Label**

**Means Comparisons**

**Comparisons with a control using Dunnett's Method**

Control Group = -NA

|            |              |
|------------|--------------|
| <b> d </b> | <b>Alpha</b> |
| 2.65691    | 0.05         |

| <b>Level</b> | <b>Abs(Dif)-</b> |                |
|--------------|------------------|----------------|
|              | <b>LSD</b>       | <b>p-Value</b> |
| 50nM-NA      | 0.276            | 0.0010 *       |
| 5nM-NA       | 0.109            | 0.0118 *       |
| -NA          | -0.48            | 1.0000         |
| 5nM+NA       | 0.678            | <.0001 *       |
| +NA          | 0.915            | <.0001 *       |
| 50nM+NA      | 0.949            | <.0001 *       |

Positive values show pairs of means that are significantly different.



**Oneway Analysis of Chodroitin By Label**

**Means Comparisons**

**Comparisons with a control using Dunnett's Method**

Control Group = -NA

|            |              |
|------------|--------------|
| <b> d </b> | <b>Alpha</b> |
| 2.65691    | 0.05         |

| <b>Level</b> | <b>Abs(Dif)-</b> |                |
|--------------|------------------|----------------|
|              | <b>LSD</b>       | <b>p-Value</b> |
| 5nM-NA       | -2.7             | 0.7455         |
| -NA          | -4.45            | 1.0000         |
| 50nM-NA      | -4.06            | 0.9995         |
| 5nM+NA       | -3.69            | 0.9882         |
| 50nM+NA      | -1.09            | 0.1896         |
| +NA          | 0.407            | 0.0286 *       |

Positive values show pairs of means that are significantly different.

**Oneway Analysis of Cholesterol By Label**

**Means Comparisons**

**Comparisons with a control using Dunnett's Method**

Control Group = -NA

|         |       |
|---------|-------|
| d       | Alpha |
| 2.65691 | 0.05  |

| Level   | Abs(Dif)- |         |
|---------|-----------|---------|
|         | LSD       | p-Value |
| 5nM-NA  | -1.88     | 0.6161  |
| 5nM+NA  | -3.03     | 0.9961  |
| 50nM+NA | -3.14     | 0.9988  |
| -NA     | -3.5      | 1.0000  |
| 50nM-NA | -2.39     | 0.8672  |
| +NA     | -1.6      | 0.4744  |

Positive values show pairs of means that are significantly different.

**Oneway Analysis of cholesteryl sulfate By Label**

**Means Comparisons**

**Comparisons with a control using Dunnett's Method**

Control Group = -NA

|            |              |
|------------|--------------|
| <b> d </b> | <b>Alpha</b> |
| 2.65691    | 0.05         |

| <b>Level</b> | <b>Abs(Dif)-</b> |                |
|--------------|------------------|----------------|
|              | <b>LSD</b>       | <b>p-Value</b> |
| 50nM-NA      | -0.03            | 0.0585         |
| 5nM-NA       | -0.46            | 0.3529         |
| 5nM+NA       | -0.63            | 0.5908         |
| +NA          | -0.76            | 0.7883         |
| -NA          | -1.2             | 1.0000         |
| 50nM+NA      | -1.01            | 0.9918         |

Positive values show pairs of means that are significantly different.

**Oneway Analysis of choline By Label**

**Means Comparisons**

**Comparisons with a control using Dunnett's Method**

Control Group = -NA

|d|      Alpha  
2.65691      0.05

| Level   | Abs(Dif)- |          |
|---------|-----------|----------|
|         | LSD       | p-Value  |
| 50nM-NA | 0.546     | 0.0001 * |
| -NA     | -0.62     | 1.0000   |
| 5nM-NA  | -0.56     | 0.9990   |
| 5nM+NA  | 0.523     | 0.0001 * |
| +NA     | 0.601     | <.0001 * |
| 50nM+NA | 0.611     | <.0001 * |

Positive values show pairs of means that are significantly different.

**Oneway Analysis of Citric acid By Label**

**Means Comparisons**

**Comparisons with a control using Dunnett's Method**

Control Group = -NA

|            |              |
|------------|--------------|
| <b> d </b> | <b>Alpha</b> |
| 2.65691    | 0.05         |

| <b>Level</b> | <b>Abs(Dif)-<br/>LSD</b> | <b>p-Value</b> |
|--------------|--------------------------|----------------|
| -NA          | -2.99                    | 1.0000         |
| 5nM+NA       | -0.92                    | 0.2551         |
| 50nM+NA      | 0.014                    | 0.0486 *       |
| +NA          | 0.191                    | 0.0340 *       |
| 50nM-NA      | 6.195                    | <.0001 *       |
| 5nM-NA       | 7.28                     | <.0001 *       |

Positive values show pairs of means that are significantly different.

**Oneway Analysis of citrulline By Label**

**Means Comparisons**

**Comparisons with a control using Dunnett's Method**

Control Group = -NA

|            |              |
|------------|--------------|
| <b> d </b> | <b>Alpha</b> |
| 2.65691    | 0.05         |

| <b>Level</b> | <b>Abs(Dif)-</b> |                |
|--------------|------------------|----------------|
|              | <b>LSD</b>       | <b>p-Value</b> |
| 50nM+NA      | 0.421            | 0.0033 *       |
| 5nM-NA       | -0.6             | 0.7217         |
| +NA          | -0.61            | 0.7398         |
| 5nM+NA       | -0.99            | 1.0000         |
| -NA          | -1.02            | 1.0000         |
| 50nM-NA      | -0.66            | 0.8212         |

Positive values show pairs of means that are significantly different.

**Oneway Analysis of CMP By Label**

**Means Comparisons**

**Comparisons with a control using Dunnett's Method**

Control Group = -NA

|            |              |
|------------|--------------|
| <b> d </b> | <b>Alpha</b> |
| 2.65691    | 0.05         |

| <b>Level</b> | <b>Abs(Dif)-</b> |                |
|--------------|------------------|----------------|
|              | <b>LSD</b>       | <b>p-Value</b> |
| 5nM-NA       | -0.16            | 0.2165         |
| 50nM+NA      | -0.4             | 0.8478         |
| -NA          | -0.59            | 1.0000         |
| 5nM+NA       | -0.54            | 0.9994         |
| 50nM-NA      | -0.41            | 0.8752         |
| +NA          | -0.36            | 0.7322         |

Positive values show pairs of means that are significantly different.

**Oneway Analysis of CMP-N-acetylneuraminic acid By Label**

**Means Comparisons**

**Comparisons with a control using Dunnett's Method**

Control Group = -NA

|            |              |
|------------|--------------|
| <b> d </b> | <b>Alpha</b> |
| 2.65691    | 0.05         |

| <b>Level</b> | <b>Abs(Dif)-</b> |                |
|--------------|------------------|----------------|
|              | <b>LSD</b>       | <b>p-Value</b> |
| +NA          | 0.107            | 0.0213 *       |
| 5nM+NA       | -0.44            | 0.6705         |
| -NA          | -0.78            | 1.0000         |
| 50nM+NA      | -0.29            | 0.3351         |
| 5nM-NA       | -0.26            | 0.2830         |
| 50nM-NA      | 0.316            | 0.0035 *       |

Positive values show pairs of means that are significantly different.



**Oneway Analysis of creatine By Label**

**Means Comparisons**

**Comparisons with a control using Dunnett's Method**

Control Group = -NA

|            |              |
|------------|--------------|
| <b> d </b> | <b>Alpha</b> |
| 2.65691    | 0.05         |

| <b>Level</b> | <b>Abs(Dif)-</b> |                |
|--------------|------------------|----------------|
|              | <b>LSD</b>       | <b>p-Value</b> |
| 50nM-NA      | 0.808            | <.0001 *       |
| 5nM-NA       | 0.635            | <.0001 *       |
| 50nM+NA      | -0.62            | 1.0000         |
| -NA          | -0.63            | 1.0000         |
| +NA          | -0.61            | 1.0000         |
| 5nM+NA       | -0.59            | 0.9998         |

Positive values show pairs of means that are significantly different.

**Oneway Analysis of Creatinine By Label**

**Means Comparisons**

**Comparisons with a control using Dunnett's Method**

Control Group = -NA

|            |              |
|------------|--------------|
| <b> d </b> | <b>Alpha</b> |
| 2.65691    | 0.05         |

| <b>Level</b> | <b>Abs(Dif)-</b> |                |
|--------------|------------------|----------------|
|              | <b>LSD</b>       | <b>p-Value</b> |
| 50nM-NA      | 2.899            | <.0001 *       |
| 5nM-NA       | 1.289            | <.0001 *       |
| -NA          | -0.33            | 1.0000         |
| 50nM+NA      | -0.18            | 0.6171         |
| 5nM+NA       | -0.06            | 0.1275         |
| +NA          | -0.05            | 0.1152         |

Positive values show pairs of means that are significantly different.

**Oneway Analysis of Cyclic ADP-ribose By Label**

**Means Comparisons**

**Comparisons with a control using Dunnett's Method**

Control Group = -NA

|            |              |
|------------|--------------|
| <b> d </b> | <b>Alpha</b> |
| 2.65691    | 0.05         |

| <b>Level</b> | <b>Abs(Dif)-</b> |                |
|--------------|------------------|----------------|
|              | <b>LSD</b>       | <b>p-Value</b> |
| +NA          | 1.147            | <.0001 *       |
| 50nM+NA      | 0.536            | 0.0027 *       |
| 5nM+NA       | 0.529            | 0.0028 *       |
| -NA          | -1.21            | 1.0000         |
| 5nM-NA       | 2.724            | <.0001 *       |
| 50nM-NA      | 2.74             | <.0001 *       |

Positive values show pairs of means that are significantly different.

**Oneway Analysis of cyclic-AMP By Label****Means Comparisons****Comparisons with a control using Dunnett's Method**

Control Group = -NA

|            |              |
|------------|--------------|
| <b> d </b> | <b>Alpha</b> |
| 2.65691    | 0.05         |

| <b>Level</b> | <b>Abs(Dif)-</b> |                |
|--------------|------------------|----------------|
|              | <b>LSD</b>       | <b>p-Value</b> |
| 50nM-NA      | -0.69            | 0.8336         |
| -NA          | -1.05            | 1.0000         |
| 5nM-NA       | -0.99            | 0.9999         |
| 50nM+NA      | -0.97            | 0.9998         |
| 5nM+NA       | -0.89            | 0.9933         |
| +NA          | -0.78            | 0.9413         |

Positive values show pairs of means that are significantly different.

**Oneway Analysis of cystathionine By Label**

**Means Comparisons**

**Comparisons with a control using Dunnett's Method**

Control Group = -NA

|            |              |
|------------|--------------|
| <b> d </b> | <b>Alpha</b> |
| 2.65691    | 0.05         |

| <b>Level</b> | <b>Abs(Dif)-</b> |                |
|--------------|------------------|----------------|
|              | <b>LSD</b>       | <b>p-Value</b> |
| 50nM-NA      | 0.017            | 0.0193 *       |
| 5nM-NA       | -0.09            | 0.9908         |
| -NA          | -0.11            | 1.0000         |
| 5nM+NA       | -0.07            | 0.7010         |
| 50nM+NA      | -0.05            | 0.4060         |
| +NA          | -9e-4            | 0.0525         |

Positive values show pairs of means that are significantly different.

**Oneway Analysis of Cysteineglutathione disulfide By Label**

**Means Comparisons**

**Comparisons with a control using Dunnett's Method**

Control Group = -NA

|            |              |
|------------|--------------|
| <b> d </b> | <b>Alpha</b> |
| 2.65691    | 0.05         |

| <b>Level</b> | <b>Abs(Dif)-</b> |                |
|--------------|------------------|----------------|
|              | <b>LSD</b>       | <b>p-Value</b> |
| 5nM-NA       | -1.54            | 0.9985         |
| -NA          | -1.73            | 1.0000         |
| 50nM-NA      | -0.03            | 0.0554         |
| 50nM+NA      | 0.869            | 0.0018 *       |
| +NA          | 1.934            | <.0001 *       |
| 5nM+NA       | 2.196            | <.0001 *       |

Positive values show pairs of means that are significantly different.

**Oneway Analysis of Cystine By Label**

**Means Comparisons**

**Comparisons with a control using Dunnett's Method**

Control Group = -NA

|            |              |
|------------|--------------|
| <b> d </b> | <b>Alpha</b> |
| 2.65691    | 0.05         |

| <b>Level</b> | <b>Abs(Dif)-</b> |                |
|--------------|------------------|----------------|
|              | <b>LSD</b>       | <b>p-Value</b> |
| 5nM-NA       | 0.12             | 0.0316 *       |
| 5nM+NA       | -0.34            | 0.1650         |
| +NA          | -0.91            | 0.6807         |
| 50nM+NA      | -1.02            | 0.8054         |
| 50nM-NA      | -1.46            | 0.9996         |
| -NA          | -1.59            | 1.0000         |

Positive values show pairs of means that are significantly different.

**Oneway Analysis of cytidine By Label**

**Means Comparisons**

**Comparisons with a control using Dunnett's Method**

Control Group = -NA

|         |       |
|---------|-------|
| d       | Alpha |
| 2.65691 | 0.05  |

| Level   | Abs(Dif)- |          |
|---------|-----------|----------|
|         | LSD       | p-Value  |
| 50nM-NA | 2.13      | <.0001 * |
| 5nM-NA  | 0.618     | <.0001 * |
| 50nM+NA | -0.23     | 0.9348   |
| 5nM+NA  | -0.25     | 0.9847   |
| +NA     | -0.29     | 0.9998   |
| -NA     | -0.31     | 1.0000   |

Positive values show pairs of means that are significantly different.



**Oneway Analysis of cytosine By Label**

**Means Comparisons**

**Comparisons with a control using Dunnett's Method**

Control Group = -NA

|            |              |
|------------|--------------|
| <b> d </b> | <b>Alpha</b> |
| 2.65691    | 0.05         |

| <b>Level</b> | <b>Abs(Dif)-</b> |                |
|--------------|------------------|----------------|
|              | <b>LSD</b>       | <b>p-Value</b> |
| 50nM-NA      | 0.765            | 0.0002 *       |
| 5nM-NA       | -0.19            | 0.1484         |
| +NA          | -0.42            | 0.4389         |
| 50nM+NA      | -0.69            | 0.9189         |
| 5nM+NA       | -0.7             | 0.9240         |
| -NA          | -0.96            | 1.0000         |

Positive values show pairs of means that are significantly different.

|                                         |
|-----------------------------------------|
| <b>Oneway Analysis of dAMP By Label</b> |
|-----------------------------------------|

|                          |
|--------------------------|
| <b>Means Comparisons</b> |
|--------------------------|

|                                                          |
|----------------------------------------------------------|
| <b>Comparisons with a control using Dunnett's Method</b> |
|----------------------------------------------------------|

Control Group = -NA

|            |              |
|------------|--------------|
| <b> d </b> | <b>Alpha</b> |
| 2.65691    | 0.05         |

| <b>Level</b> | <b>Abs(Dif)-<br/>LSD</b> | <b>p-Value</b> |
|--------------|--------------------------|----------------|
| +NA          | 0.49                     | 0.0002 *       |
| 50nM+NA      | -0.12                    | 0.1450         |
| 5nM+NA       | -0.22                    | 0.3168         |
| -NA          | -0.6                     | 1.0000         |
| 50nM-NA      | 2.051                    | <.0001 *       |
| 5nM-NA       | 2.051                    | <.0001 *       |

Positive values show pairs of means that are significantly different.

**Oneway Analysis of dCMP By Label****Means Comparisons****Comparisons with a control using Dunnett's Method**

Control Group = -NA

|         |       |
|---------|-------|
| d       | Alpha |
| 2.65691 | 0.05  |

| Level   | Abs(Dif)-<br>LSD | p-Value  |
|---------|------------------|----------|
| -NA     | -0.84            | 1.0000   |
| 50nM+NA | -0.78            | 0.9997   |
| 5nM-NA  | -0.71            | 0.9928   |
| +NA     | -0.61            | 0.9185   |
| 5nM+NA  | -0.23            | 0.2188   |
| 50nM-NA | 0.562            | 0.0005 * |

Positive values show pairs of means that are significantly different.

|                                                   |
|---------------------------------------------------|
| <b>Oneway Analysis of deoxyadenosine By Label</b> |
|---------------------------------------------------|

|                          |
|--------------------------|
| <b>Means Comparisons</b> |
|--------------------------|

|                                                          |
|----------------------------------------------------------|
| <b>Comparisons with a control using Dunnett's Method</b> |
|----------------------------------------------------------|

Control Group = -NA

|            |              |
|------------|--------------|
| <b> d </b> | <b>Alpha</b> |
| 2.65691    | 0.05         |

| <b>Level</b> | <b>Abs(Dif)-<br/>LSD</b> | <b>p-Value</b> |
|--------------|--------------------------|----------------|
| -NA          | -0.88                    | 1.0000         |
| +NA          | 0.403                    | 0.0024 *       |
| 5nM+NA       | 0.547                    | 0.0007 *       |
| 5nM-NA       | 0.611                    | 0.0004 *       |
| 50nM+NA      | 0.818                    | <.0001 *       |
| 50nM-NA      | 2.524                    | <.0001 *       |

Positive values show pairs of means that are significantly different.

**Oneway Analysis of Deoxyheptulose-7-phosphate By Label**

**Means Comparisons**

**Comparisons with a control using Dunnett's Method**

Control Group = -NA

|            |              |
|------------|--------------|
| <b> d </b> | <b>Alpha</b> |
| 2.65691    | 0.05         |

| <b>Level</b> | <b>Abs(Dif)-</b> |                |
|--------------|------------------|----------------|
|              | <b>LSD</b>       | <b>p-Value</b> |
| +NA          | 0.477            | 0.0018 *       |
| 5nM+NA       | 0.215            | 0.0121 *       |
| 50nM+NA      | -0.29            | 0.2492         |
| -NA          | -0.96            | 1.0000         |
| 5nM-NA       | -0.74            | 0.9618         |
| 50nM-NA      | -0.24            | 0.1980         |

Positive values show pairs of means that are significantly different.

**Oneway Analysis of deoxyribose-phosphate By Label**

**Means Comparisons**

**Comparisons with a control using Dunnett's Method**

Control Group = -NA

|            |              |
|------------|--------------|
| <b> d </b> | <b>Alpha</b> |
| 2.65691    | 0.05         |

| <b>Level</b> | <b>Abs(Dif)-</b> |                |
|--------------|------------------|----------------|
|              | <b>LSD</b>       | <b>p-Value</b> |
| 50nM+NA      | -0.55            | 0.4467         |
| 5nM-NA       | -0.73            | 0.7146         |
| -NA          | -1.24            | 1.0000         |
| 5nM+NA       | -1.12            | 0.9990         |
| +NA          | -1.03            | 0.9873         |
| 50nM-NA      | -1               | 0.9793         |

Positive values show pairs of means that are significantly different.

**Oneway Analysis of deoxyuridine By Label**

**Means Comparisons**

**Comparisons with a control using Dunnett's Method**

Control Group = -NA

|d|      Alpha  
 2.65691      0.05

| Level   | Abs(Dif)- |          |
|---------|-----------|----------|
|         | LSD       | p-Value  |
| -NA     | -1.18     | 1.0000   |
| 5nM-NA  | 0.11      | 0.0283 * |
| 50nM-NA | 0.617     | 0.0015 * |
| 50nM+NA | 1.046     | 0.0001 * |
| 5nM+NA  | 1.382     | <.0001 * |
| +NA     | 1.712     | <.0001 * |

Positive values show pairs of means that are significantly different.

**Oneway Analysis of dGDP By Label**

**Means Comparisons**

**Comparisons with a control using Dunnett's Method**

Control Group = -NA

|            |              |
|------------|--------------|
| <b> d </b> | <b>Alpha</b> |
| 2.65691    | 0.05         |

| <b>Level</b> | <b>Abs(Dif)-</b> |                |
|--------------|------------------|----------------|
|              | <b>LSD</b>       | <b>p-Value</b> |
| 50nM-NA      | 0.376            | 0.0011 *       |
| 5nM-NA       | 0.203            | 0.0070 *       |
| 5nM+NA       | -0.45            | 0.8519         |
| 50nM+NA      | -0.55            | 0.9883         |
| -NA          | -0.67            | 1.0000         |
| +NA          | -0.34            | 0.5735         |

Positive values show pairs of means that are significantly different.



**Oneway Analysis of D-gluconate By Label**

**Means Comparisons**

**Comparisons with a control using Dunnett's Method**

Control Group = -NA

|            |              |
|------------|--------------|
| <b> d </b> | <b>Alpha</b> |
| 2.65691    | 0.05         |

| <b>Level</b> | <b>Abs(Dif)-</b> |                |
|--------------|------------------|----------------|
|              | <b>LSD</b>       | <b>p-Value</b> |
| 50nM-NA      | 1.61             | <.0001 *       |
| 5nM-NA       | 1.593            | <.0001 *       |
| -NA          | -0.22            | 1.0000         |
| 50nM+NA      | 0.188            | 0.0002 *       |
| 5nM+NA       | 0.208            | <.0001 *       |
| +NA          | 0.24             | <.0001 *       |

Positive values show pairs of means that are significantly different.

**Oneway Analysis of dihydroxy-acetone-phosphate By Label**

**Means Comparisons**

**Comparisons with a control using Dunnett's Method**

Control Group = -NA

|            |              |
|------------|--------------|
| <b> d </b> | <b>Alpha</b> |
| 2.65691    | 0.05         |

| <b>Level</b> | <b>Abs(Dif)-</b> |                |
|--------------|------------------|----------------|
|              | <b>LSD</b>       | <b>p-Value</b> |
| 50nM-NA      | -0.55            | 0.5227         |
| 5nM-NA       | -0.8             | 0.9032         |
| -NA          | -1.13            | 1.0000         |
| 5nM+NA       | -0.91            | 0.9809         |
| 50nM+NA      | -0.69            | 0.7464         |
| +NA          | -0.4             | 0.3102         |

Positive values show pairs of means that are significantly different.

**Oneway Analysis of dimethylglycine By Label**

**Means Comparisons**

**Comparisons with a control using Dunnett's Method**

Control Group = -NA

|            |              |
|------------|--------------|
| <b> d </b> | <b>Alpha</b> |
| 2.65691    | 0.05         |

| <b>Level</b> | <b>Abs(Dif)-</b> |                |
|--------------|------------------|----------------|
|              | <b>LSD</b>       | <b>p-Value</b> |
| 50nM-NA      | 0.615            | 0.0003 *       |
| -NA          | -0.8             | 1.0000         |
| 5nM-NA       | -0.52            | 0.8161         |
| 5nM+NA       | 0.616            | 0.0003 *       |
| +NA          | 0.637            | 0.0002 *       |
| 50nM+NA      | 0.664            | 0.0002 *       |

Positive values show pairs of means that are significantly different.

|                                                      |
|------------------------------------------------------|
| <b>Oneway Analysis of DL-Pipecolic acid By Label</b> |
|------------------------------------------------------|

|                          |
|--------------------------|
| <b>Means Comparisons</b> |
|--------------------------|

|                                                          |
|----------------------------------------------------------|
| <b>Comparisons with a control using Dunnett's Method</b> |
|----------------------------------------------------------|

Control Group = -NA

|            |              |
|------------|--------------|
| <b> d </b> | <b>Alpha</b> |
| 2.65691    | 0.05         |

| <b>Level</b> | <b>Abs(Dif)-</b> |                |
|--------------|------------------|----------------|
|              | <b>LSD</b>       | <b>p-Value</b> |
| 5nM-NA       | 0.36             | 0.0086 *       |
| 50nM-NA      | -0.09            | 0.0756         |
| 50nM+NA      | -0.15            | 0.0957         |
| 5nM+NA       | -0.36            | 0.2237         |
| +NA          | -0.71            | 0.6325         |
| -NA          | -1.3             | 1.0000         |

Positive values show pairs of means that are significantly different.

**Oneway Analysis of D-sedoheptulose-1-7-bisphosphate By Label**

**Means Comparisons**

**Comparisons with a control using Dunnett's Method**

Control Group = -NA

|            |              |
|------------|--------------|
| <b> d </b> | <b>Alpha</b> |
| 2.65691    | 0.05         |

| <b>Level</b> | <b>Abs(Dif)-</b> |                |
|--------------|------------------|----------------|
|              | <b>LSD</b>       | <b>p-Value</b> |
| 50nM-NA      | 2.653            | <.0001 *       |
| 5nM-NA       | 0.739            | <.0001 *       |
| -NA          | -0.25            | 1.0000         |
| 50nM+NA      | -0.22            | 0.9945         |
| 5nM+NA       | -0.21            | 0.9823         |
| +NA          | -0.2             | 0.9712         |

Positive values show pairs of means that are significantly different.

**Oneway Analysis of FAD By Label**

**Means Comparisons**

**Comparisons with a control using Dunnett's Method**

Control Group = -NA

|            |              |
|------------|--------------|
| <b> d </b> | <b>Alpha</b> |
| 2.65691    | 0.05         |

| <b>Level</b> | <b>Abs(Dif)-</b> |                |
|--------------|------------------|----------------|
|              | <b>LSD</b>       | <b>p-Value</b> |
| 50nM-NA      | 0.07             | 0.0278 *       |
| 5nM-NA       | -0.19            | 0.2092         |
| 50nM+NA      | -0.57            | 0.9610         |
| -NA          | -0.73            | 1.0000         |
| 5nM+NA       | -0.62            | 0.9933         |
| +NA          | -0.38            | 0.5898         |

Positive values show pairs of means that are significantly different.

**Oneway Analysis of folate By Label**

**Means Comparisons**

**Comparisons with a control using Dunnett's Method**

Control Group = -NA

|         |       |
|---------|-------|
| d       | Alpha |
| 2.65691 | 0.05  |

| Level   | Abs(Dif)- |          |
|---------|-----------|----------|
|         | LSD       | p-Value  |
| 50nM-NA | 0.287     | 0.0053 * |
| 5nM-NA  | 0.127     | 0.0193 * |
| 5nM+NA  | -0.74     | 0.9988   |
| -NA     | -0.83     | 1.0000   |
| 50nM+NA | -0.76     | 0.9995   |
| +NA     | -0.68     | 0.9848   |

Positive values show pairs of means that are significantly different.

**Oneway Analysis of fructose-1,6-bisphosphate By Label**

**Means Comparisons**

**Comparisons with a control using Dunnett's Method**

Control Group = -NA

|            |              |
|------------|--------------|
| <b> d </b> | <b>Alpha</b> |
| 2.65691    | 0.05         |

| <b>Level</b> | <b>Abs(Dif)-</b> |                |
|--------------|------------------|----------------|
|              | <b>LSD</b>       | <b>p-Value</b> |
| 50nM-NA      | 2.916            | <.0001 *       |
| 5nM-NA       | 0.596            | <.0001 *       |
| -NA          | -0.24            | 1.0000         |
| 50nM+NA      | -0.2             | 0.9828         |
| 5nM+NA       | -0.19            | 0.9555         |
| +NA          | -0.18            | 0.9278         |

Positive values show pairs of means that are significantly different.



**Oneway Analysis of fructose-6-phosphate By Label**

**Means Comparisons**

**Comparisons with a control using Dunnett's Method**

Control Group = -NA

|         |       |
|---------|-------|
| d       | Alpha |
| 2.65691 | 0.05  |

| Level   | Abs(Dif)- |          |
|---------|-----------|----------|
|         | LSD       | p-Value  |
| 50nM-NA | 2.797     | <.0001 * |
| 5nM-NA  | 0.307     | 0.0001 * |
| -NA     | -0.36     | 1.0000   |
| 5nM+NA  | -0.36     | 1.0000   |
| +NA     | -0.35     | 1.0000   |
| 50nM+NA | -0.35     | 1.0000   |

Positive values show pairs of means that are significantly different.

**Oneway Analysis of Geranyl-PP By Label**

**Means Comparisons**

**Comparisons with a control using Dunnett's Method**

Control Group = -NA

|            |              |
|------------|--------------|
| <b> d </b> | <b>Alpha</b> |
| 2.65691    | 0.05         |

| <b>Level</b> | <b>Abs(Dif)-</b> |                |
|--------------|------------------|----------------|
|              | <b>LSD</b>       | <b>p-Value</b> |
| 50nM-NA      | 4.242            | <.0001 *       |
| 5nM-NA       | 2.494            | <.0001 *       |
| -NA          | -0.51            | 1.0000         |
| 50nM+NA      | -0.48            | 1.0000         |
| 5nM+NA       | -0.38            | 0.9415         |
| +NA          | -0.36            | 0.9077         |

Positive values show pairs of means that are significantly different.

**Oneway Analysis of Glucaric acid By Label**

**Means Comparisons**

**Comparisons with a control using Dunnett's Method**

Control Group = -NA

|         |       |
|---------|-------|
| d       | Alpha |
| 2.65691 | 0.05  |

| Level   | Abs(Dif)- |          |
|---------|-----------|----------|
|         | LSD       | p-Value  |
| 5nM+NA  | 0.327     | 0.0371 * |
| +NA     | -1.61     | 0.1895   |
| 50nM+NA | -3.06     | 0.4857   |
| -NA     | -6.59     | 1.0000   |
| 5nM-NA  | -4.33     | 0.8289   |
| 50nM-NA | -4.22     | 0.8034   |

Positive values show pairs of means that are significantly different.

**Oneway Analysis of Glucose By Label**

**Means Comparisons**

**Comparisons with a control using Dunnett's Method**

Control Group = -NA

|            |              |
|------------|--------------|
| <b> d </b> | <b>Alpha</b> |
| 2.65691    | 0.05         |

| <b>Level</b> | <b>Abs(Dif)-</b> |                |
|--------------|------------------|----------------|
|              | <b>LSD</b>       | <b>p-Value</b> |
| 5nM-NA       | -0.55            | 0.4695         |
| -NA          | -1.21            | 1.0000         |
| 5nM+NA       | -0.43            | 0.3212         |
| +NA          | -0.22            | 0.1374         |
| 50nM+NA      | -0.17            | 0.1094         |
| 50nM-NA      | -0.15            | 0.1012         |

Positive values show pairs of means that are significantly different.

**Oneway Analysis of glucose-6-phosphate By Label**

**Means Comparisons**

**Comparisons with a control using Dunnett's Method**

Control Group = -NA

|            |              |
|------------|--------------|
| <b> d </b> | <b>Alpha</b> |
| 2.65691    | 0.05         |

| <b>Level</b> | <b>Abs(Dif)-<br/>LSD</b> | <b>p-Value</b> |
|--------------|--------------------------|----------------|
| -NA          | -0.64                    | 1.0000         |
| 50nM-NA      | -0.62                    | 1.0000         |
| 5nM-NA       | -0.43                    | 0.8621         |
| 50nM+NA      | 0.943                    | <.0001 *       |
| +NA          | 1.008                    | <.0001 *       |
| 5nM+NA       | 1.152                    | <.0001 *       |

Positive values show pairs of means that are significantly different.

**Oneway Analysis of glutamate By Label**

**Means Comparisons**

**Comparisons with a control using Dunnett's Method**

Control Group = -NA

|d|      Alpha  
 2.65691      0.05

| Level   | Abs(Dif)- |          |
|---------|-----------|----------|
|         | LSD       | p-Value  |
| -NA     | -0.66     | 1.0000   |
| 50nM+NA | 0.328     | 0.0018 * |
| 5nM-NA  | 0.47      | 0.0004 * |
| +NA     | 0.512     | 0.0002 * |
| 5nM+NA  | 0.549     | 0.0002 * |
| 50nM-NA | 0.922     | <.0001 * |

Positive values show pairs of means that are significantly different.

|                                              |
|----------------------------------------------|
| <b>Oneway Analysis of glutamine By Label</b> |
|----------------------------------------------|

|                          |
|--------------------------|
| <b>Means Comparisons</b> |
|--------------------------|

|                                                          |
|----------------------------------------------------------|
| <b>Comparisons with a control using Dunnett's Method</b> |
|----------------------------------------------------------|

Control Group = -NA

|            |              |
|------------|--------------|
| <b> d </b> | <b>Alpha</b> |
| 2.65691    | 0.05         |

| <b>Level</b> | <b>Abs(Dif)-<br/>LSD</b> | <b>p-Value</b> |
|--------------|--------------------------|----------------|
| -NA          | -1.41                    | 1.0000         |
| 50nM-NA      | 0.972                    | 0.0005 *       |
| 5nM-NA       | 1.432                    | <.0001 *       |
| 5nM+NA       | 1.708                    | <.0001 *       |
| +NA          | 1.767                    | <.0001 *       |
| 50nM+NA      | 2.076                    | <.0001 *       |

Positive values show pairs of means that are significantly different.

**Oneway Analysis of Glutathionedisulfide By Label**

**Means Comparisons**

**Comparisons with a control using Dunnett's Method**

Control Group = -NA

|         |       |
|---------|-------|
| d       | Alpha |
| 2.65691 | 0.05  |

| Level   | Abs(Dif)- |          |
|---------|-----------|----------|
|         | LSD       | p-Value  |
| +NA     | -1.64     | 1.0000   |
| -NA     | -1.66     | 1.0000   |
| 50nM+NA | -1.54     | 0.9998   |
| 50nM-NA | 1.501     | <.0001 * |
| 5nM+NA  | 2.439     | <.0001 * |
| 5nM-NA  | 2.534     | <.0001 * |

Positive values show pairs of means that are significantly different.



**Oneway Analysis of Glutathione By Label**

**Means Comparisons**

**Comparisons with a control using Dunnett's Method**

Control Group = -NA

|            |              |
|------------|--------------|
| <b> d </b> | <b>Alpha</b> |
| 2.65691    | 0.05         |

| <b>Level</b> | <b>Abs(Dif)-</b> |                |
|--------------|------------------|----------------|
|              | <b>LSD</b>       | <b>p-Value</b> |
| 50nM-NA      | 2.626            | <.0001 *       |
| 50nM+NA      | -1.21            | 0.8298         |
| -NA          | -1.85            | 1.0000         |
| +NA          | -1.3             | 0.8917         |
| 5nM-NA       | -0.83            | 0.4626         |
| 5nM+NA       | 0.019            | 0.0471 *       |

Positive values show pairs of means that are significantly different.

**Oneway Analysis of Glycerophosphocholine By Label**

**Means Comparisons**

**Comparisons with a control using Dunnett's Method**

Control Group = -NA

|            |              |
|------------|--------------|
| <b> d </b> | <b>Alpha</b> |
| 2.65691    | 0.05         |

| <b>Level</b> | <b>Abs(Dif)-</b> |                |
|--------------|------------------|----------------|
|              | <b>LSD</b>       | <b>p-Value</b> |
| 50nM+NA      | 0.438            | 0.0023 *       |
| 5nM+NA       | 0.337            | 0.0049 *       |
| +NA          | -0.14            | 0.1130         |
| 5nM-NA       | -0.28            | 0.2408         |
| 50nM-NA      | -0.92            | 1.0000         |
| -NA          | -0.94            | 1.0000         |

Positive values show pairs of means that are significantly different.

**Oneway Analysis of glycine By Label**

**Means Comparisons**

**Comparisons with a control using Dunnett's Method**

Control Group = -NA

|d|      Alpha  
2.65691      0.05

| Level   | Abs(Dif)- |          |
|---------|-----------|----------|
|         | LSD       | p-Value  |
| 50nM-NA | 0.518     | 0.0003 * |
| 5nM-NA  | 0.367     | 0.0013 * |
| 5nM+NA  | 0.243     | 0.0049 * |
| +NA     | 0.001     | 0.0497 * |
| 50nM+NA | -0.06     | 0.0815   |
| -NA     | -0.68     | 1.0000   |

Positive values show pairs of means that are significantly different.

**Oneway Analysis of GMP By Label**

**Means Comparisons**

**Comparisons with a control using Dunnett's Method**

Control Group = -NA

|            |              |
|------------|--------------|
| <b> d </b> | <b>Alpha</b> |
| 2.65691    | 0.05         |

| <b>Level</b> | <b>Abs(Dif)-</b> |                |
|--------------|------------------|----------------|
|              | <b>LSD</b>       | <b>p-Value</b> |
| 50nM+NA      | 0.136            | 0.0194 *       |
| -NA          | -0.9             | 1.0000         |
| +NA          | -0.87            | 1.0000         |
| 5nM+NA       | -0.41            | 0.4797         |
| 5nM-NA       | 0.244            | 0.0088 *       |
| 50nM-NA      | 0.347            | 0.0040 *       |

Positive values show pairs of means that are significantly different.

**Oneway Analysis of Guanidoacetic acid By Label**

**Means Comparisons**

**Comparisons with a control using Dunnett's Method**

Control Group = -NA

|            |              |
|------------|--------------|
| <b> d </b> | <b>Alpha</b> |
| 2.65691    | 0.05         |

| <b>Level</b> | <b>Abs(Dif)-</b> |                |
|--------------|------------------|----------------|
|              | <b>LSD</b>       | <b>p-Value</b> |
| 50nM+NA      | -0.41            | 0.4206         |
| 5nM-NA       | -0.42            | 0.4365         |
| 50nM-NA      | -0.62            | 0.8089         |
| 5nM+NA       | -0.71            | 0.9327         |
| -NA          | -0.95            | 1.0000         |
| +NA          | -0.59            | 0.7618         |

Positive values show pairs of means that are significantly different.

**Oneway Analysis of Histidine By Label**

**Means Comparisons**

**Comparisons with a control using Dunnett's Method**

Control Group = -NA

|d|      Alpha  
2.65691      0.05

| Level   | Abs(Dif)- |          |
|---------|-----------|----------|
|         | LSD       | p-Value  |
| 50nM-NA | 1.929     | <.0001 * |
| 5nM-NA  | 1.096     | 0.0004 * |
| -NA     | -1.52     | 1.0000   |
| 50nM+NA | 0.229     | 0.0197 * |
| 5nM+NA  | 0.39      | 0.0098 * |
| +NA     | 0.653     | 0.0030 * |

Positive values show pairs of means that are significantly different.

**Oneway Analysis of homocysteine By Label**

**Means Comparisons**

**Comparisons with a control using Dunnett's Method**

Control Group = -NA

|            |              |
|------------|--------------|
| <b> d </b> | <b>Alpha</b> |
| 2.65691    | 0.05         |

| <b>Level</b> | <b>Abs(Dif)-</b> |                |
|--------------|------------------|----------------|
|              | <b>LSD</b>       | <b>p-Value</b> |
| 50nM+NA      | -0.12            | 0.6769         |
| 5nM-NA       | -0.21            | 1.0000         |
| -NA          | -0.21            | 1.0000         |
| +NA          | -0.2             | 1.0000         |
| 50nM-NA      | -0.14            | 0.8455         |
| 5nM+NA       | -0.1             | 0.4563         |

Positive values show pairs of means that are significantly different.

**Oneway Analysis of homoserine By Label**

**Means Comparisons**

**Comparisons with a control using Dunnett's Method**

Control Group = -NA

|            |              |
|------------|--------------|
| <b> d </b> | <b>Alpha</b> |
| 2.65691    | 0.05         |

| <b>Level</b> | <b>Abs(Dif)-</b> |                |
|--------------|------------------|----------------|
|              | <b>LSD</b>       | <b>p-Value</b> |
| 5nM-NA       | -1.5             | 0.9727         |
| -NA          | -1.89            | 1.0000         |
| 5nM+NA       | -1.86            | 1.0000         |
| +NA          | -1.49            | 0.9710         |
| 50nM+NA      | -1.24            | 0.8314         |
| 50nM-NA      | -1.11            | 0.7145         |

Positive values show pairs of means that are significantly different.



**Oneway Analysis of Homoserine lacton By Label**

**Means Comparisons**

**Comparisons with a control using Dunnett's Method**

Control Group = -NA

|d|      Alpha  
2.65691      0.05

| Level   | Abs(Dif)- |          |
|---------|-----------|----------|
|         | LSD       | p-Value  |
| 5nM+NA  | 0.622     | <.0001 * |
| +NA     | 0.383     | 0.0002 * |
| 50nM+NA | -0.01     | 0.0599   |
| -NA     | -0.48     | 1.0000   |
| 5nM-NA  | -0.45     | 0.9999   |
| 50nM-NA | -0.32     | 0.8586   |

Positive values show pairs of means that are significantly different.

**Oneway Analysis of Hydroxyisocaproic acid By Label**

**Means Comparisons**

**Comparisons with a control using Dunnett's Method**

Control Group = -NA

|            |              |
|------------|--------------|
| <b> d </b> | <b>Alpha</b> |
| 2.65691    | 0.05         |

| <b>Level</b> | <b>Abs(Dif)-<br/>LSD</b> | <b>p-Value</b> |
|--------------|--------------------------|----------------|
| 50nM-NA      | 0.034                    | 0.0407 *       |
| 5nM-NA       | -0.68                    | 0.8705         |
| 5nM+NA       | -0.86                    | 0.9962         |
| -NA          | -0.99                    | 1.0000         |
| 50nM+NA      | -0.96                    | 1.0000         |
| +NA          | -0.38                    | 0.3606         |

Positive values show pairs of means that are significantly different.

|                                                  |
|--------------------------------------------------|
| <b>Oneway Analysis of Hydroxylamine By Label</b> |
|--------------------------------------------------|

|                          |
|--------------------------|
| <b>Means Comparisons</b> |
|--------------------------|

|                                                          |
|----------------------------------------------------------|
| <b>Comparisons with a control using Dunnett's Method</b> |
|----------------------------------------------------------|

Control Group = -NA

|            |              |
|------------|--------------|
| <b> d </b> | <b>Alpha</b> |
| 2.65691    | 0.05         |

| <b>Level</b> | <b>Abs(Dif)-<br/>LSD</b> | <b>p-Value</b> |
|--------------|--------------------------|----------------|
| +NA          | -1.72                    | 0.4962         |
| 50nM+NA      | -2.77                    | 0.9472         |
| -NA          | -3.66                    | 1.0000         |
| 5nM+NA       | -3.55                    | 1.0000         |
| 5nM-NA       | -2.72                    | 0.9362         |
| 50nM-NA      | 0.016                    | 0.0487 *       |

Positive values show pairs of means that are significantly different.

**Oneway Analysis of hydroxyproline By Label**

**Means Comparisons**

**Comparisons with a control using Dunnett's Method**

Control Group = -NA

|            |              |
|------------|--------------|
| <b> d </b> | <b>Alpha</b> |
| 2.65691    | 0.05         |

| <b>Level</b> | <b>Abs(Dif)-</b> |                |
|--------------|------------------|----------------|
|              | <b>LSD</b>       | <b>p-Value</b> |
| 5nM-NA       | 0.357            | 0.0029 *       |
| 50nM-NA      | 0.082            | 0.0272 *       |
| +NA          | -0.41            | 0.5371         |
| 5nM+NA       | -0.42            | 0.5786         |
| 50nM+NA      | -0.52            | 0.7974         |
| -NA          | -0.82            | 1.0000         |

Positive values show pairs of means that are significantly different.

**Oneway Analysis of IDP By Label**

**Means Comparisons**

**Comparisons with a control using Dunnett's Method**

Control Group = -NA

|         |       |
|---------|-------|
| d       | Alpha |
| 2.65691 | 0.05  |

| Level   | Abs(Dif)- |          |
|---------|-----------|----------|
|         | LSD       | p-Value  |
| 5nM-NA  | 0.024     | 0.0443 * |
| 50nM-NA | -0.23     | 0.1467   |
| 50nM+NA | -0.76     | 0.8106   |
| +NA     | -1.11     | 1.0000   |
| -NA     | -1.17     | 1.0000   |
| 5nM+NA  | -0.85     | 0.9160   |

Positive values show pairs of means that are significantly different.

**Oneway Analysis of Imidazoleacetic acid By Label****Means Comparisons****Comparisons with a control using Dunnett's Method**

Control Group = -NA

|         |       |
|---------|-------|
| d       | Alpha |
| 2.65691 | 0.05  |

| Level   | Abs(Dif)- |          |
|---------|-----------|----------|
|         | LSD       | p-Value  |
| 5nM+NA  | 0.156     | 0.0150 * |
| 50nM+NA | 0.056     | 0.0329 * |
| +NA     | -0.22     | 0.2110   |
| 5nM-NA  | -0.68     | 0.9901   |
| -NA     | -0.81     | 1.0000   |
| 50nM-NA | -0.52     | 0.8108   |

Positive values show pairs of means that are significantly different.

**Oneway Analysis of IMP By Label**

**Means Comparisons**

**Comparisons with a control using Dunnett's Method**

Control Group = -NA

|            |              |
|------------|--------------|
| <b> d </b> | <b>Alpha</b> |
| 2.65691    | 0.05         |

| <b>Level</b> | <b>Abs(Dif)-<br/>LSD</b> | <b>p-Value</b> |
|--------------|--------------------------|----------------|
| 50nM-NA      | 1.897                    | <.0001 *       |
| 5nM-NA       | 1.147                    | <.0001 *       |
| -NA          | -0.47                    | 1.0000         |
| 50nM+NA      | -0.44                    | 1.0000         |
| +NA          | -0.44                    | 0.9999         |
| 5nM+NA       | -0.43                    | 0.9998         |

Positive values show pairs of means that are significantly different.

**Oneway Analysis of indole By Label**

**Means Comparisons**

**Comparisons with a control using Dunnett's Method**

Control Group = -NA

|            |              |
|------------|--------------|
| <b> d </b> | <b>Alpha</b> |
| 2.65691    | 0.05         |

| <b>Level</b> | <b>Abs(Dif)-</b> |                |
|--------------|------------------|----------------|
|              | <b>LSD</b>       | <b>p-Value</b> |
| 50nM-NA      | 1.076            | <.0001 *       |
| 5nM-NA       | 0.785            | <.0001 *       |
| +NA          | -0.59            | 0.9977         |
| 5nM+NA       | -0.6             | 0.9987         |
| 50nM+NA      | -0.65            | 1.0000         |
| -NA          | -0.67            | 1.0000         |

Positive values show pairs of means that are significantly different.



**Oneway Analysis of Indoleacrylic acid By Label**

**Means Comparisons**

**Comparisons with a control using Dunnett's Method**

Control Group = -NA

|            |              |
|------------|--------------|
| <b> d </b> | <b>Alpha</b> |
| 2.65691    | 0.05         |

| <b>Level</b> | <b>Abs(Dif)-</b> |                |
|--------------|------------------|----------------|
|              | <b>LSD</b>       | <b>p-Value</b> |
| 50nM-NA      | -0.55            | 0.4768         |
| 5nM+NA       | -0.93            | 0.9604         |
| 5nM-NA       | -1.02            | 0.9931         |
| 50nM+NA      | -1.18            | 1.0000         |
| -NA          | -1.21            | 1.0000         |
| +NA          | -1               | 0.9879         |

Positive values show pairs of means that are significantly different.

**Oneway Analysis of inosine By Label**

**Means Comparisons**

**Comparisons with a control using Dunnett's Method**

Control Group = -NA

|            |              |
|------------|--------------|
| <b> d </b> | <b>Alpha</b> |
| 2.65691    | 0.05         |

| <b>Level</b> | <b>Abs(Dif)-</b> |                |
|--------------|------------------|----------------|
|              | <b>LSD</b>       | <b>p-Value</b> |
| 50nM-NA      | 3.917            | <.0001 *       |
| 5nM-NA       | 1.332            | <.0001 *       |
| -NA          | -0.52            | 1.0000         |
| 5nM+NA       | -0.5             | 1.0000         |
| 50nM+NA      | -0.47            | 0.9994         |
| +NA          | -0.47            | 0.9990         |

Positive values show pairs of means that are significantly different.

**Oneway Analysis of isocitrate By Label**

**Means Comparisons**

**Comparisons with a control using Dunnett's Method**

Control Group = -NA

|         |       |
|---------|-------|
| d       | Alpha |
| 2.65691 | 0.05  |

| Level   | Abs(Dif)- |          |
|---------|-----------|----------|
|         | LSD       | p-Value  |
| +NA     | 2.516     | <.0001 * |
| 50nM+NA | 2.162     | <.0001 * |
| 5nM+NA  | 1.972     | <.0001 * |
| 50nM-NA | -0.65     | 1.0000   |
| 5nM-NA  | -0.65     | 1.0000   |
| -NA     | -0.65     | 1.0000   |

Positive values show pairs of means that are significantly different.

**Oneway Analysis of Isoleucine By Label**

**Means Comparisons**

**Comparisons with a control using Dunnett's Method**

Control Group = -NA

|            |              |
|------------|--------------|
| <b> d </b> | <b>Alpha</b> |
| 2.65691    | 0.05         |

| <b>Level</b> | <b>Abs(Dif)-</b> |                |
|--------------|------------------|----------------|
|              | <b>LSD</b>       | <b>p-Value</b> |
| 5nM-NA       | -0.01            | 0.3887         |
| 50nM-NA      | -0.01            | 0.7095         |
| -NA          | -0.02            | 1.0000         |
| 5nM+NA       | -0.01            | 0.9863         |
| 50nM+NA      | -0.01            | 0.9431         |
| +NA          | -0.01            | 0.9189         |

Positive values show pairs of means that are significantly different.

**Oneway Analysis of Ketohecanoic acid By Label**

**Means Comparisons**

**Comparisons with a control using Dunnett's Method**

Control Group = -NA

|            |              |
|------------|--------------|
| <b> d </b> | <b>Alpha</b> |
| 2.65691    | 0.05         |

| <b>Level</b> | <b>Abs(Dif)-</b> |                |
|--------------|------------------|----------------|
|              | <b>LSD</b>       | <b>p-Value</b> |
| 5nM-NA       | -1.77            | 0.4313         |
| 50nM+NA      | -4.01            | 1.0000         |
| 5nM+NA       | -4.07            | 1.0000         |
| -NA          | -4.09            | 1.0000         |
| +NA          | -3.18            | 0.9642         |
| 50nM-NA      | -0.49            | 0.0999         |

Positive values show pairs of means that are significantly different.

**Oneway Analysis of Ketoleucine By Label**

**Means Comparisons**

**Comparisons with a control using Dunnett's Method**

Control Group = -NA

|         |       |
|---------|-------|
| d       | Alpha |
| 2.65691 | 0.05  |

| Level   | Abs(Dif)- |          |
|---------|-----------|----------|
|         | LSD       | p-Value  |
| 5nM+NA  | 0.396     | 0.0012 * |
| +NA     | 0.345     | 0.0020 * |
| 50nM+NA | 0.025     | 0.0406 * |
| 5nM-NA  | -0.4      | 0.6796   |
| 50nM-NA | -0.44     | 0.7735   |
| -NA     | -0.71     | 1.0000   |

Positive values show pairs of means that are significantly different.

**Oneway Analysis of Kynurenic acid By Label**

**Means Comparisons**

**Comparisons with a control using Dunnett's Method**

Control Group = -NA

|            |              |
|------------|--------------|
| <b> d </b> | <b>Alpha</b> |
| 2.65691    | 0.05         |

| <b>Level</b> | <b>Abs(Dif)-</b> |                |
|--------------|------------------|----------------|
|              | <b>LSD</b>       | <b>p-Value</b> |
| 50nM+NA      | -0.52            | 0.4611         |
| -NA          | -1.16            | 1.0000         |
| 5nM+NA       | -1               | 0.9959         |
| +NA          | -0.93            | 0.9781         |
| 50nM-NA      | -0.15            | 0.1062         |
| 5nM-NA       | -0.11            | 0.0878         |

Positive values show pairs of means that are significantly different.

**Oneway Analysis of Kynurenine By Label**

**Means Comparisons**

**Comparisons with a control using Dunnett's Method**

Control Group = -NA

|            |              |
|------------|--------------|
| <b> d </b> | <b>Alpha</b> |
| 2.65691    | 0.05         |

| <b>Level</b> | <b>Abs(Dif)-</b> |                |
|--------------|------------------|----------------|
|              | <b>LSD</b>       | <b>p-Value</b> |
| 5nM+NA       | 0.083            | 0.0186 *       |
| 5nM-NA       | -0.12            | 0.1782         |
| 50nM-NA      | -0.16            | 0.2443         |
| 50nM+NA      | -0.25            | 0.5081         |
| +NA          | -0.3             | 0.6908         |
| -NA          | -0.52            | 1.0000         |

Positive values show pairs of means that are significantly different.



**Oneway Analysis of Lactic acid By Label**

**Means Comparisons**

**Comparisons with a control using Dunnett's Method**

Control Group = -NA

|            |              |
|------------|--------------|
| <b> d </b> | <b>Alpha</b> |
| 2.65691    | 0.05         |

| <b>Level</b> | <b>Abs(Dif)-<br/>LSD</b> | <b>p-Value</b> |
|--------------|--------------------------|----------------|
| 5nM-NA       | -0.01                    | 0.2142         |
| -NA          | -0.03                    | 1.0000         |
| 50nM-NA      | -0.01                    | 0.4231         |
| 50nM+NA      | 0.02                     | 0.0003 *       |
| 5nM+NA       | 0.02                     | 0.0003 *       |
| +NA          | 0.029                    | <.0001 *       |

Positive values show pairs of means that are significantly different.

|                                            |
|--------------------------------------------|
| <b>Oneway Analysis of leucine By Label</b> |
|--------------------------------------------|

|                          |
|--------------------------|
| <b>Means Comparisons</b> |
|--------------------------|

|                                                          |
|----------------------------------------------------------|
| <b>Comparisons with a control using Dunnett's Method</b> |
|----------------------------------------------------------|

Control Group = -NA

|            |              |
|------------|--------------|
| <b> d </b> | <b>Alpha</b> |
| 2.65691    | 0.05         |

| <b>Level</b> | <b>Abs(Dif)-</b> |                |
|--------------|------------------|----------------|
|              | <b>LSD</b>       | <b>p-Value</b> |
| 50nM-NA      | 0.255            | 0.0091 *       |
| 5nM-NA       | -0.36            | 0.3489         |
| -NA          | -0.96            | 1.0000         |
| 5nM+NA       | -0.74            | 0.9622         |
| 50nM+NA      | -0.63            | 0.8373         |
| +NA          | -0.56            | 0.7144         |

Positive values show pairs of means that are significantly different.

**Oneway Analysis of Lysine By Label**

**Means Comparisons**

**Comparisons with a control using Dunnett's Method**

Control Group = -NA

|         |       |
|---------|-------|
| d       | Alpha |
| 2.65691 | 0.05  |

| Level   | Abs(Dif)- |          |
|---------|-----------|----------|
|         | LSD       | p-Value  |
| 50nM-NA | 0.367     | 0.0029 * |
| 5nM+NA  | 0.031     | 0.0401 * |
| +NA     | 0.002     | 0.0495 * |
| 50nM+NA | -0.45     | 0.6077   |
| 5nM-NA  | -0.45     | 0.6080   |
| -NA     | -0.85     | 1.0000   |

Positive values show pairs of means that are significantly different.

**Oneway Analysis of LysoPC(20:4) By Label**

**Means Comparisons**

**Comparisons with a control using Dunnett's Method**

Control Group = -NA

|            |              |
|------------|--------------|
| <b> d </b> | <b>Alpha</b> |
| 2.65691    | 0.05         |

| <b>Level</b> | <b>Abs(Dif)-</b> |                |
|--------------|------------------|----------------|
|              | <b>LSD</b>       | <b>p-Value</b> |
| 50nM-NA      | -0.23            | 0.1328         |
| +NA          | -0.31            | 0.1835         |
| 5nM+NA       | -0.43            | 0.2858         |
| 50nM+NA      | -0.86            | 0.8431         |
| -NA          | -1.29            | 1.0000         |
| 5nM-NA       | -1.24            | 1.0000         |

Positive values show pairs of means that are significantly different.

**Oneway Analysis of Maleic acid By Label**

**Means Comparisons**

**Comparisons with a control using Dunnett's Method**

Control Group = -NA

|            |              |
|------------|--------------|
| <b> d </b> | <b>Alpha</b> |
| 2.65691    | 0.05         |

| <b>Level</b> | <b>Abs(Dif)-</b> |                |
|--------------|------------------|----------------|
|              | <b>LSD</b>       | <b>p-Value</b> |
| 50nM-NA      | 0.856            | <.0001 *       |
| 5nM-NA       | 0.039            | 0.0299 *       |
| -NA          | -0.46            | 1.0000         |
| 5nM+NA       | -0.23            | 0.5689         |
| 50nM+NA      | -0.2             | 0.4549         |
| +NA          | -0.19            | 0.3997         |

Positive values show pairs of means that are significantly different.

**Oneway Analysis of Mannitol By Label**

**Means Comparisons**

**Comparisons with a control using Dunnett's Method**

Control Group = -NA

|            |              |
|------------|--------------|
| <b> d </b> | <b>Alpha</b> |
| 2.65691    | 0.05         |

| <b>Level</b> | <b>Abs(Dif)-</b> |                |
|--------------|------------------|----------------|
|              | <b>LSD</b>       | <b>p-Value</b> |
| 5nM-NA       | -0.01            | 0.9586         |
| -NA          | -0.01            | 1.0000         |
| 50nM-NA      | 0.001            | 0.0380 *       |
| 50nM+NA      | 0.011            | 0.0002 *       |
| 5nM+NA       | 0.011            | 0.0002 *       |
| +NA          | 0.015            | <.0001 *       |

Positive values show pairs of means that are significantly different.

**Oneway Analysis of methionine By Label**

**Means Comparisons**

**Comparisons with a control using Dunnett's Method**

Control Group = -NA

|            |              |
|------------|--------------|
| <b> d </b> | <b>Alpha</b> |
| 2.65691    | 0.05         |

| <b>Level</b> | <b>Abs(Dif)-</b> |                |
|--------------|------------------|----------------|
|              | <b>LSD</b>       | <b>p-Value</b> |
| 50nM-NA      | 1.168            | <.0001 *       |
| 5nM-NA       | 0.898            | <.0001 *       |
| 5nM+NA       | 0.146            | 0.0098 *       |
| 50nM+NA      | 0.009            | 0.0455 *       |
| +NA          | -0.19            | 0.2811         |
| -NA          | -0.57            | 1.0000         |

Positive values show pairs of means that are significantly different.

**Oneway Analysis of Methionine sulfoxide By Label**

**Means Comparisons**

**Comparisons with a control using Dunnett's Method**

Control Group = -NA

|            |              |
|------------|--------------|
| <b> d </b> | <b>Alpha</b> |
| 2.65691    | 0.05         |

| <b>Level</b> | <b>Abs(Dif)-</b> |                |
|--------------|------------------|----------------|
|              | <b>LSD</b>       | <b>p-Value</b> |
| 5nM+NA       | 0.419            | 0.0009 *       |
| 50nM-NA      | 0.315            | 0.0026 *       |
| 5nM-NA       | 0.201            | 0.0080 *       |
| 50nM+NA      | -0.06            | 0.0831         |
| +NA          | -0.25            | 0.3239         |
| -NA          | -0.7             | 1.0000         |

Positive values show pairs of means that are significantly different.



**Oneway Analysis of Methylcysteine By Label**

**Means Comparisons**

**Comparisons with a control using Dunnett's Method**

Control Group = -NA

|            |              |
|------------|--------------|
| <b> d </b> | <b>Alpha</b> |
| 2.65691    | 0.05         |

| <b>Level</b> | <b>Abs(Dif)-</b> |                |
|--------------|------------------|----------------|
|              | <b>LSD</b>       | <b>p-Value</b> |
| 50nM-NA      | 0.778            | <.0001 *       |
| 5nM-NA       | 0.491            | <.0001 *       |
| -NA          | -0.48            | 1.0000         |
| 50nM+NA      | -0.42            | 0.9972         |
| 5nM+NA       | -0.42            | 0.9967         |
| +NA          | -0.31            | 0.8264         |

Positive values show pairs of means that are significantly different.

**Oneway Analysis of Methylmalonic acid By Label**

**Means Comparisons**

**Comparisons with a control using Dunnett's Method**

Control Group = -NA

|            |              |
|------------|--------------|
| <b> d </b> | <b>Alpha</b> |
| 2.65691    | 0.05         |

| <b>Level</b> | <b>Abs(Dif)-</b> |                |
|--------------|------------------|----------------|
|              | <b>LSD</b>       | <b>p-Value</b> |
| 5nM+NA       | 0.289            | 0.0025 *       |
| 50nM+NA      | 0.241            | 0.0043 *       |
| +NA          | 0.063            | 0.0272 *       |
| -NA          | -0.64            | 1.0000         |
| 5nM-NA       | -0.22            | 0.3086         |
| 50nM-NA      | -0.18            | 0.2348         |

Positive values show pairs of means that are significantly different.

**Oneway Analysis of Myo-Inositol By Label**

**Means Comparisons**

**Comparisons with a control using Dunnett's Method**

Control Group = -NA

|            |              |
|------------|--------------|
| <b> d </b> | <b>Alpha</b> |
| 2.65691    | 0.05         |

| <b>Level</b> | <b>Abs(Dif)-<br/>LSD</b> | <b>p-Value</b> |
|--------------|--------------------------|----------------|
| -NA          | -0.42                    | 1.0000         |
| 5nM-NA       | -0.36                    | 0.9923         |
| 5nM+NA       | -0.27                    | 0.7990         |
| 50nM+NA      | -0.23                    | 0.6282         |
| 50nM-NA      | -0.21                    | 0.5393         |
| +NA          | -0.13                    | 0.2639         |

Positive values show pairs of means that are significantly different.

**Oneway Analysis of N6-Acetyl-L-lysine By Label**

**Means Comparisons**

**Comparisons with a control using Dunnett's Method**

Control Group = -NA

|         |       |
|---------|-------|
| d       | Alpha |
| 2.65691 | 0.05  |

| Level   | Abs(Dif)- |          |
|---------|-----------|----------|
|         | LSD       | p-Value  |
| 50nM-NA | 0.171     | 0.0064 * |
| 5nM-NA  | 0.157     | 0.0076 * |
| -NA     | -0.53     | 1.0000   |
| 50nM+NA | -0.27     | 0.5656   |
| 5nM+NA  | -0.09     | 0.1311   |
| +NA     | 0.031     | 0.0354 * |

Positive values show pairs of means that are significantly different.

**Oneway Analysis of N-Acetylaspartyglutamic acid By Label**

**Means Comparisons**

**Comparisons with a control using Dunnett's Method**

Control Group = -NA

|         |       |
|---------|-------|
| d       | Alpha |
| 2.65691 | 0.05  |

| Level   | Abs(Dif)- |          |
|---------|-----------|----------|
|         | LSD       | p-Value  |
| 5nM+NA  | 0.01      | 0.0487 * |
| 50nM+NA | -1.24     | 0.6454   |
| +NA     | -1.39     | 0.7654   |
| -NA     | -2.25     | 1.0000   |
| 5nM-NA  | -0.58     | 0.2040   |
| 50nM-NA | 0.327     | 0.0204 * |

Positive values show pairs of means that are significantly different.

**Oneway Analysis of N-acetyl-glucosamine-1-phosphate By Label**

**Means Comparisons**

**Comparisons with a control using Dunnett's Method**

Control Group = -NA

|            |              |
|------------|--------------|
| <b> d </b> | <b>Alpha</b> |
| 2.65691    | 0.05         |

| <b>Level</b> | <b>Abs(Dif)-</b> |                |
|--------------|------------------|----------------|
|              | <b>LSD</b>       | <b>p-Value</b> |
| 50nM+NA      | -1.16            | 0.9130         |
| 5nM-NA       | -1.28            | 0.9752         |
| -NA          | -1.61            | 1.0000         |
| 5nM+NA       | -1.34            | 0.9884         |
| +NA          | -1.28            | 0.9749         |
| 50nM-NA      | -0.8             | 0.5417         |

Positive values show pairs of means that are significantly different.

**Oneway Analysis of N-acetyl-glutamine By Label**

**Means Comparisons**

**Comparisons with a control using Dunnett's Method**

Control Group = -NA

|            |              |
|------------|--------------|
| <b> d </b> | <b>Alpha</b> |
| 2.65691    | 0.05         |

| <b>Level</b> | <b>Abs(Dif)-</b> |                |
|--------------|------------------|----------------|
|              | <b>LSD</b>       | <b>p-Value</b> |
| 5nM-NA       | 0.236            | 0.0027 *       |
| 50nM-NA      | 0.104            | 0.0147 *       |
| -NA          | -0.53            | 1.0000         |
| 50nM+NA      | -0.12            | 0.1719         |
| 5nM+NA       | -0.06            | 0.0977         |
| +NA          | 0.103            | 0.0150 *       |

Positive values show pairs of means that are significantly different.

**Oneway Analysis of N-Acetyl-L-alanine By Label**

**Means Comparisons**

**Comparisons with a control using Dunnett's Method**

Control Group = -NA

|            |              |
|------------|--------------|
| <b> d </b> | <b>Alpha</b> |
| 2.65691    | 0.05         |

| <b>Level</b> | <b>Abs(Dif)-</b> |                |
|--------------|------------------|----------------|
|              | <b>LSD</b>       | <b>p-Value</b> |
| 50nM+NA      | 0.244            | 0.0074 *       |
| 5nM+NA       | -0.38            | 0.4875         |
| +NA          | -0.51            | 0.7691         |
| -NA          | -0.82            | 1.0000         |
| 5nM-NA       | -0.76            | 0.9998         |
| 50nM-NA      | -0.75            | 0.9996         |

Positive values show pairs of means that are significantly different.



|                                                         |
|---------------------------------------------------------|
| <b>Oneway Analysis of N-acetyl-L-ornithine By Label</b> |
|---------------------------------------------------------|

|                          |
|--------------------------|
| <b>Means Comparisons</b> |
|--------------------------|

|                                                          |
|----------------------------------------------------------|
| <b>Comparisons with a control using Dunnett's Method</b> |
|----------------------------------------------------------|

Control Group = -NA

|            |              |
|------------|--------------|
| <b> d </b> | <b>Alpha</b> |
| 2.65691    | 0.05         |

| <b>Level</b> | <b>Abs(Dif)-</b> |                |
|--------------|------------------|----------------|
|              | <b>LSD</b>       | <b>p-Value</b> |
| 50nM-NA      | 0.077            | 0.0292 *       |
| 5nM-NA       | -0.71            | 0.9840         |
| -NA          | -0.88            | 1.0000         |
| +NA          | -0.48            | 0.6455         |
| 50nM+NA      | -0.41            | 0.4955         |
| 5nM+NA       | -0.4             | 0.4648         |

Positive values show pairs of means that are significantly different.

**Oneway Analysis of N-Acetylputrescine By Label**

**Means Comparisons**

**Comparisons with a control using Dunnett's Method**

Control Group = -NA

|            |              |
|------------|--------------|
| <b> d </b> | <b>Alpha</b> |
| 2.65691    | 0.05         |

| <b>Level</b> | <b>Abs(Dif)-</b> |                |
|--------------|------------------|----------------|
|              | <b>LSD</b>       | <b>p-Value</b> |
| 5nM-NA       | 0.24             | 0.0100 *       |
| -NA          | -0.95            | 1.0000         |
| 50nM-NA      | -0.34            | 0.3171         |
| 5nM+NA       | -0.29            | 0.2578         |
| 50nM+NA      | -0.17            | 0.1364         |
| +NA          | -0.02            | 0.0572         |

Positive values show pairs of means that are significantly different.

**Oneway Analysis of NAD By Label**

**Means Comparisons**

**Comparisons with a control using Dunnett's Method**

Control Group = -NA

|            |              |
|------------|--------------|
| <b> d </b> | <b>Alpha</b> |
| 2.65691    | 0.05         |

| <b>Level</b> | <b>Abs(Dif)-</b> |                |
|--------------|------------------|----------------|
|              | <b>LSD</b>       | <b>p-Value</b> |
| 50nM+NA      | 0.662            | <.0001 *       |
| +NA          | 0.62             | <.0001 *       |
| 5nM+NA       | 0.323            | 0.0003 *       |
| -NA          | -0.44            | 1.0000         |
| 5nM-NA       | 2.146            | <.0001 *       |
| 50nM-NA      | 2.176            | <.0001 *       |

Positive values show pairs of means that are significantly different.

**Oneway Analysis of NADH By Label**

**Means Comparisons**

**Comparisons with a control using Dunnett's Method**

Control Group = -NA

|            |              |
|------------|--------------|
| <b> d </b> | <b>Alpha</b> |
| 2.65691    | 0.05         |

| <b>Level</b> | <b>Abs(Dif)-</b> |                |
|--------------|------------------|----------------|
|              | <b>LSD</b>       | <b>p-Value</b> |
| +NA          | 0.305            | 0.0019 *       |
| 5nM+NA       | 0.12             | 0.0148 *       |
| 50nM+NA      | 0.03             | 0.0373 *       |
| -NA          | -0.62            | 1.0000         |
| 5nM-NA       | 1.972            | <.0001 *       |
| 50nM-NA      | 2.077            | <.0001 *       |

Positive values show pairs of means that are significantly different.

**Oneway Analysis of NADP+ By Label**

**Means Comparisons**

**Comparisons with a control using Dunnett's Method**

Control Group = -NA

|            |              |
|------------|--------------|
| <b> d </b> | <b>Alpha</b> |
| 2.65691    | 0.05         |

| <b>Level</b> | <b>Abs(Dif)-</b> |                |
|--------------|------------------|----------------|
|              | <b>LSD</b>       | <b>p-Value</b> |
| 50nM+NA      | 0.136            | 0.0236 *       |
| +NA          | -0.89            | 0.9735         |
| 5nM+NA       | -0.92            | 0.9864         |
| -NA          | -1.12            | 1.0000         |
| 5nM-NA       | 0.694            | 0.0008 *       |
| 50nM-NA      | 1.28             | <.0001 *       |

Positive values show pairs of means that are significantly different.

**Oneway Analysis of N-carbamoyl-L-aspartate By Label**

**Means Comparisons**

**Comparisons with a control using Dunnett's Method**

Control Group = -NA

|            |              |
|------------|--------------|
| <b> d </b> | <b>Alpha</b> |
| 2.65691    | 0.05         |

| <b>Level</b> | <b>Abs(Dif)-</b> |                |
|--------------|------------------|----------------|
|              | <b>LSD</b>       | <b>p-Value</b> |
| 5nM+NA       | 1.518            | <.0001 *       |
| +NA          | 1.437            | <.0001 *       |
| 50nM+NA      | 1.332            | <.0001 *       |
| 50nM-NA      | -0.54            | 1.0000         |
| 5nM-NA       | -0.55            | 1.0000         |
| -NA          | -0.56            | 1.0000         |

Positive values show pairs of means that are significantly different.

|                                                                       |
|-----------------------------------------------------------------------|
| <b>Oneway Analysis of N-Formylglycinamide ribonucleotide By Label</b> |
|-----------------------------------------------------------------------|

|                          |
|--------------------------|
| <b>Means Comparisons</b> |
|--------------------------|

|                                                          |
|----------------------------------------------------------|
| <b>Comparisons with a control using Dunnett's Method</b> |
|----------------------------------------------------------|

Control Group = -NA

|            |              |
|------------|--------------|
| <b> d </b> | <b>Alpha</b> |
| 2.65691    | 0.05         |

| <b>Level</b> | <b>Abs(Dif)-</b> |                |
|--------------|------------------|----------------|
|              | <b>LSD</b>       | <b>p-Value</b> |
| 50nM-NA      | 2.557            | <.0001 *       |
| 5nM-NA       | 1.408            | <.0001 *       |
| -NA          | -0.31            | 1.0000         |
| +NA          | -0.3             | 1.0000         |
| 5nM+NA       | -0.3             | 1.0000         |
| 50nM+NA      | -0.29            | 0.9997         |

Positive values show pairs of means that are significantly different.

**Oneway Analysis of Ng,NG-dimethyl-L-arginine By Label**

**Means Comparisons**

**Comparisons with a control using Dunnett's Method**

Control Group = -NA

|            |              |
|------------|--------------|
| <b> d </b> | <b>Alpha</b> |
| 2.65691    | 0.05         |

| <b>Level</b> | <b>Abs(Dif)-</b> |                |
|--------------|------------------|----------------|
|              | <b>LSD</b>       | <b>p-Value</b> |
| 50nM-NA      | 0.092            | 0.0212 *       |
| 5nM-NA       | -0.19            | 0.2296         |
| 5nM+NA       | -0.59            | 0.9982         |
| -NA          | -0.66            | 1.0000         |
| 50nM+NA      | -0.61            | 0.9995         |
| +NA          | -0.39            | 0.7121         |

Positive values show pairs of means that are significantly different.



**Oneway Analysis of Nicotinamide By Label**

**Means Comparisons**

**Comparisons with a control using Dunnett's Method**

Control Group = -NA

|            |              |
|------------|--------------|
| <b> d </b> | <b>Alpha</b> |
| 2.65691    | 0.05         |

| <b>Level</b> | <b>Abs(Dif)-</b> |                |
|--------------|------------------|----------------|
|              | <b>LSD</b>       | <b>p-Value</b> |
| 50nM-NA      | -0.88            | 1.0000         |
| -NA          | -0.9             | 1.0000         |
| 5nM-NA       | -0.88            | 1.0000         |
| +NA          | 0.194            | 0.0129 *       |
| 50nM+NA      | 0.289            | 0.0064 *       |
| 5nM+NA       | 0.431            | 0.0021 *       |

Positive values show pairs of means that are significantly different.

|                                                          |
|----------------------------------------------------------|
| <b>Oneway Analysis of Nicotinamide ribotide By Label</b> |
|----------------------------------------------------------|

|                          |
|--------------------------|
| <b>Means Comparisons</b> |
|--------------------------|

|                                                          |
|----------------------------------------------------------|
| <b>Comparisons with a control using Dunnett's Method</b> |
|----------------------------------------------------------|

Control Group = -NA

|            |              |
|------------|--------------|
| <b> d </b> | <b>Alpha</b> |
| 2.65691    | 0.05         |

| <b>Level</b> | <b>Abs(Dif)-<br/>LSD</b> | <b>p-Value</b> |
|--------------|--------------------------|----------------|
| +NA          | 0.172                    | 0.0086 *       |
| 50nM+NA      | 0.08                     | 0.0228 *       |
| 5nM+NA       | -0.16                    | 0.2078         |
| -NA          | -0.63                    | 1.0000         |
| 5nM-NA       | 2.149                    | <.0001 *       |
| 50nM-NA      | 2.174                    | <.0001 *       |

Positive values show pairs of means that are significantly different.

**Oneway Analysis of Nicotinic acid By Label**

**Means Comparisons**

**Comparisons with a control using Dunnett's Method**

Control Group = -NA

|            |              |
|------------|--------------|
| <b> d </b> | <b>Alpha</b> |
| 2.65691    | 0.05         |

| <b>Level</b> | <b>Abs(Dif)-</b> |                |
|--------------|------------------|----------------|
|              | <b>LSD</b>       | <b>p-Value</b> |
| 5nM+NA       | 1.403            | <.0001 *       |
| +NA          | 1.332            | <.0001 *       |
| 50nM+NA      | 1.204            | <.0001 *       |
| 50nM-NA      | -0.59            | 1.0000         |
| 5nM-NA       | -0.59            | 1.0000         |
| -NA          | -0.59            | 1.0000         |

Positive values show pairs of means that are significantly different.

**Oneway Analysis of N-Methylantranilic acid By Label**

**Means Comparisons**

**Comparisons with a control using Dunnett's Method**

Control Group = -NA

|d|      Alpha  
2.65691      0.05

| Level   | Abs(Dif)- |          |
|---------|-----------|----------|
|         | LSD       | p-Value  |
| 50nM-NA | -2.07     | 0.9983   |
| -NA     | -2.33     | 1.0000   |
| 5nM-NA  | -2.06     | 0.9981   |
| +NA     | 1.902     | 0.0002 * |
| 5nM+NA  | 1.982     | 0.0001 * |
| 50nM+NA | 3.629     | <.0001 * |

Positive values show pairs of means that are significantly different.

**Oneway Analysis of O-acetyl-L-serine By Label**

**Means Comparisons**

**Comparisons with a control using Dunnett's Method**

Control Group = -NA

|         |       |
|---------|-------|
| d       | Alpha |
| 2.65691 | 0.05  |

| Level   | Abs(Dif)- |          |
|---------|-----------|----------|
|         | LSD       | p-Value  |
| 5nM+NA  | 0.328     | 0.0038 * |
| 50nM+NA | 0.14      | 0.0176 * |
| +NA     | 0.046     | 0.0359 * |
| 5nM-NA  | -0.06     | 0.0742   |
| 50nM-NA | -0.76     | 0.9994   |
| -NA     | -0.83     | 1.0000   |

Positive values show pairs of means that are significantly different.

**Oneway Analysis of octulose-monophosphate By Label**

**Means Comparisons**

**Comparisons with a control using Dunnett's Method**

Control Group = -NA

|            |              |
|------------|--------------|
| <b> d </b> | <b>Alpha</b> |
| 2.65691    | 0.05         |

| <b>Level</b> | <b>Abs(Dif)-</b> |                |
|--------------|------------------|----------------|
|              | <b>LSD</b>       | <b>p-Value</b> |
| 50nM-NA      | 0.561            | <.0001 *       |
| 5nM-NA       | 0.225            | 0.0035 *       |
| -NA          | -0.55            | 1.0000         |
| 5nM+NA       | -0.03            | 0.0663         |
| 50nM+NA      | 0.017            | 0.0414 *       |
| +NA          | 0.4              | 0.0004 *       |

Positive values show pairs of means that are significantly different.

**Oneway Analysis of ornithine By Label**

**Means Comparisons**

**Comparisons with a control using Dunnett's Method**

Control Group = -NA

|            |              |
|------------|--------------|
| <b> d </b> | <b>Alpha</b> |
| 2.65691    | 0.05         |

| <b>Level</b> | <b>Abs(Dif)-</b> |                |
|--------------|------------------|----------------|
|              | <b>LSD</b>       | <b>p-Value</b> |
| 50nM-NA      | 0.573            | <.0001 *       |
| 5nM-NA       | 0.432            | 0.0004 *       |
| 5nM+NA       | -0.56            | 0.9997         |
| -NA          | -0.6             | 1.0000         |
| 50nM+NA      | -0.55            | 0.9996         |
| +NA          | -0.51            | 0.9915         |

Positive values show pairs of means that are significantly different.

**Oneway Analysis of orotate By Label**

**Means Comparisons**

**Comparisons with a control using Dunnett's Method**

Control Group = -NA

|         |       |
|---------|-------|
| d       | Alpha |
| 2.65691 | 0.05  |

| Level   | Abs(Dif)- |          |
|---------|-----------|----------|
|         | LSD       | p-Value  |
| 5nM+NA  | 1.781     | <.0001 * |
| 50nM+NA | 1.47      | <.0001 * |
| +NA     | 1.23      | <.0001 * |
| -NA     | -0.82     | 1.0000   |
| 5nM-NA  | -0.8      | 1.0000   |
| 50nM-NA | -0.73     | 0.9987   |

Positive values show pairs of means that are significantly different.



**Oneway Analysis of Orotidine By Label**

**Means Comparisons**

**Comparisons with a control using Dunnett's Method**

Control Group = -NA

|         |       |
|---------|-------|
| d       | Alpha |
| 2.65691 | 0.05  |

| Level   | Abs(Dif)- |          |
|---------|-----------|----------|
|         | LSD       | p-Value  |
| 50nM-NA | 1.583     | <.0001 * |
| 5nM-NA  | 0.438     | <.0001 * |
| -NA     | -0.2      | 1.0000   |
| +NA     | -0.13     | 0.8440   |
| 5nM+NA  | -0.08     | 0.3996   |
| 50nM+NA | -0.06     | 0.2535   |

Positive values show pairs of means that are significantly different.

**Oneway Analysis of Palmitic acid By Label**

**Means Comparisons**

**Comparisons with a control using Dunnett's Method**

Control Group = -NA

|         |       |
|---------|-------|
| d       | Alpha |
| 2.65691 | 0.05  |

| Level   | Abs(Dif)- |         |
|---------|-----------|---------|
|         | LSD       | p-Value |
| 5nM-NA  | -0.11     | 0.0588  |
| 50nM-NA | -1.27     | 0.2810  |
| -NA     | -3.86     | 1.0000  |
| 5nM+NA  | -3.51     | 0.9993  |
| 50nM+NA | -3.14     | 0.9824  |
| +NA     | -3.08     | 0.9761  |

Positive values show pairs of means that are significantly different.

**Oneway Analysis of pantothenate By Label**

**Means Comparisons**

**Comparisons with a control using Dunnett's Method**

Control Group = -NA

|            |              |
|------------|--------------|
| <b> d </b> | <b>Alpha</b> |
| 2.65691    | 0.05         |

| <b>Level</b> | <b>Abs(Dif)-</b> |                |
|--------------|------------------|----------------|
|              | <b>LSD</b>       | <b>p-Value</b> |
| 50nM-NA      | 0.187            | 0.0110 *       |
| 5nM-NA       | -0.13            | 0.1254         |
| 5nM+NA       | -0.74            | 0.9999         |
| -NA          | -0.79            | 1.0000         |
| 50nM+NA      | -0.78            | 1.0000         |
| +NA          | -0.61            | 0.9647         |

Positive values show pairs of means that are significantly different.

**Oneway Analysis of PC(15:0) By Label**

**Means Comparisons**

**Comparisons with a control using Dunnett's Method**

Control Group = -NA

|            |              |
|------------|--------------|
| <b> d </b> | <b>Alpha</b> |
| 2.65691    | 0.05         |

| <b>Level</b> | <b>Abs(Dif)-</b> |                |
|--------------|------------------|----------------|
|              | <b>LSD</b>       | <b>p-Value</b> |
| 50nM+NA      | -1.6             | 0.3104         |
| -NA          | -4.57            | 1.0000         |
| 5nM+NA       | -3.42            | 0.9414         |
| +NA          | -2.76            | 0.7420         |
| 5nM-NA       | 0.597            | 0.0223 *       |
| 50nM-NA      | 2.013            | 0.0027 *       |

Positive values show pairs of means that are significantly different.

**Oneway Analysis of p-Coumaric acid By Label**

**Means Comparisons**

**Comparisons with a control using Dunnett's Method**

Control Group = -NA

|         |       |
|---------|-------|
| d       | Alpha |
| 2.65691 | 0.05  |

| Level   | Abs(Dif)- |          |
|---------|-----------|----------|
|         | LSD       | p-Value  |
| 50nM-NA | 1.715     | <.0001 * |
| 5nM-NA  | 0.958     | 0.0002 * |
| 5nM+NA  | -0.69     | 0.7335   |
| -NA     | -1.15     | 1.0000   |
| 50nM+NA | -0.83     | 0.9088   |
| +NA     | -0.11     | 0.0855   |

Positive values show pairs of means that are significantly different.

**Oneway Analysis of Pentadecanal By Label**

**Means Comparisons**

**Comparisons with a control using Dunnett's Method**

Control Group = -NA

|            |              |
|------------|--------------|
| <b> d </b> | <b>Alpha</b> |
| 2.65691    | 0.05         |

| <b>Level</b> | <b>Abs(Dif)-</b> |                |
|--------------|------------------|----------------|
|              | <b>LSD</b>       | <b>p-Value</b> |
| 5nM+NA       | 0.208            | <.0001 *       |
| 5nM-NA       | 0.145            | <.0001 *       |
| -NA          | -0.08            | 1.0000         |
| 50nM-NA      | -0.01            | 0.0825         |
| 50nM+NA      | -3e-3            | 0.0617         |
| +NA          | -8e-4            | 0.0530         |

Positive values show pairs of means that are significantly different.

**Oneway Analysis of Phenacylamine By Label**

**Means Comparisons**

**Comparisons with a control using Dunnett's Method**

Control Group = -NA

|         |       |
|---------|-------|
| d       | Alpha |
| 2.65691 | 0.05  |

| Level   | Abs(Dif)- |          |
|---------|-----------|----------|
|         | LSD       | p-Value  |
| 50nM-NA | 1.556     | <.0001 * |
| 5nM-NA  | 0.876     | <.0001 * |
| 5nM+NA  | -0.6      | 0.7719   |
| -NA     | -0.96     | 1.0000   |
| 50nM+NA | -0.69     | 0.9084   |
| +NA     | -0.08     | 0.0791   |

Positive values show pairs of means that are significantly different.

**Oneway Analysis of phenylalanine By Label**

**Means Comparisons**

**Comparisons with a control using Dunnett's Method**

Control Group = -NA

|            |              |
|------------|--------------|
| <b> d </b> | <b>Alpha</b> |
| 2.65691    | 0.05         |

| <b>Level</b> | <b>Abs(Dif)-</b> |                |
|--------------|------------------|----------------|
|              | <b>LSD</b>       | <b>p-Value</b> |
| 50nM-NA      | 0.736            | <.0001 *       |
| 5nM-NA       | 0.625            | <.0001 *       |
| 5nM+NA       | -0.13            | 0.1790         |
| 50nM+NA      | -0.34            | 0.7884         |
| +NA          | -0.36            | 0.8518         |
| -NA          | -0.54            | 1.0000         |

Positive values show pairs of means that are significantly different.



**Oneway Analysis of Phenyllactic acid By Label**

**Means Comparisons**

**Comparisons with a control using Dunnett's Method**

Control Group = -NA

|d|      Alpha  
 2.65691      0.05

| Level   | Abs(Dif)-<br>LSD | p-Value  |
|---------|------------------|----------|
| -NA     | -1.86            | 1.0000   |
| 50nM+NA | 1.281            | 0.0005 * |
| 5nM+NA  | 1.335            | 0.0004 * |
| 5nM-NA  | 1.585            | 0.0001 * |
| +NA     | 1.643            | 0.0001 * |
| 50nM-NA | 1.695            | <.0001 * |

Positive values show pairs of means that are significantly different.

**Oneway Analysis of Phosphate By Label**

**Means Comparisons**

**Comparisons with a control using Dunnett's Method**

Control Group = -NA

|            |              |
|------------|--------------|
| <b> d </b> | <b>Alpha</b> |
| 2.65691    | 0.05         |

| <b>Level</b> | <b>Abs(Dif)-<br/>LSD</b> | <b>p-Value</b> |
|--------------|--------------------------|----------------|
| +NA          | -4.61                    | 0.3052         |
| 50nM-NA      | -13.2                    | 1.0000         |
| 5nM-NA       | -13.3                    | 1.0000         |
| 5nM+NA       | -13.3                    | 1.0000         |
| 50nM+NA      | -13.3                    | 1.0000         |
| -NA          | -13.3                    | 1.0000         |

Positive values show pairs of means that are significantly different.

**Oneway Analysis of Phosphatidylglycerol By Label**

**Means Comparisons**

**Comparisons with a control using Dunnett's Method**

Control Group = -NA

|            |              |
|------------|--------------|
| <b> d </b> | <b>Alpha</b> |
| 2.65691    | 0.05         |

| <b>Level</b> | <b>Abs(Dif)-</b> |                |
|--------------|------------------|----------------|
|              | <b>LSD</b>       | <b>p-Value</b> |
| 50nM-NA      | 1.468            | <.0001 *       |
| 5nM-NA       | -0.78            | 0.5427         |
| 5nM+NA       | -1.05            | 0.8463         |
| -NA          | -1.57            | 1.0000         |
| 50nM+NA      | -1.27            | 0.9803         |
| +NA          | -0.97            | 0.7615         |

Positive values show pairs of means that are significantly different.

**Oneway Analysis of phosphoenolpyruvate By Label**

**Means Comparisons**

**Comparisons with a control using Dunnett's Method**

Control Group = -NA

|            |              |
|------------|--------------|
| <b> d </b> | <b>Alpha</b> |
| 2.65691    | 0.05         |

| <b>Level</b> | <b>Abs(Dif)-</b> |                |
|--------------|------------------|----------------|
|              | <b>LSD</b>       | <b>p-Value</b> |
| 50nM-NA      | 0.391            | 0.0022 *       |
| 5nM-NA       | -0.05            | 0.0726         |
| 50nM+NA      | -0.07            | 0.0794         |
| 5nM+NA       | -0.21            | 0.1952         |
| +NA          | -0.22            | 0.2140         |
| -NA          | -0.83            | 1.0000         |

Positive values show pairs of means that are significantly different.

**Oneway Analysis of Phosphorylcholine By Label**

**Means Comparisons**

**Comparisons with a control using Dunnett's Method**

Control Group = -NA

|            |              |
|------------|--------------|
| <b> d </b> | <b>Alpha</b> |
| 2.65691    | 0.05         |

| <b>Level</b> | <b>Abs(Dif)-</b> |                |
|--------------|------------------|----------------|
|              | <b>LSD</b>       | <b>p-Value</b> |
| 5nM-NA       | 0.445            | 0.0005 *       |
| 50nM-NA      | 0.389            | 0.0010 *       |
| 5nM+NA       | -0.15            | 0.1767         |
| 50nM+NA      | -0.2             | 0.2405         |
| +NA          | -0.36            | 0.6280         |
| -NA          | -0.67            | 1.0000         |

Positive values show pairs of means that are significantly different.

**Oneway Analysis of p-hydroxybenzoate By Label**

**Means Comparisons**

**Comparisons with a control using Dunnett's Method**

Control Group = -NA

|            |              |
|------------|--------------|
| <b> d </b> | <b>Alpha</b> |
| 2.65691    | 0.05         |

| <b>Level</b> | <b>Abs(Dif)-</b> |                |
|--------------|------------------|----------------|
|              | <b>LSD</b>       | <b>p-Value</b> |
| 50nM-NA      | 0.503            | 0.0001 *       |
| 5nM-NA       | 0.131            | 0.0117 *       |
| -NA          | -0.57            | 1.0000         |
| 50nM+NA      | -0.05            | 0.0850         |
| 5nM+NA       | 0.204            | 0.0049 *       |
| +NA          | 0.265            | 0.0023 *       |

Positive values show pairs of means that are significantly different.

**Oneway Analysis of PI(16:0/20:2) By Label**

**Means Comparisons**

**Comparisons with a control using Dunnett's Method**

Control Group = -NA

|            |              |
|------------|--------------|
| <b> d </b> | <b>Alpha</b> |
| 2.65691    | 0.05         |

| <b>Level</b> | <b>Abs(Dif)-</b> |                |
|--------------|------------------|----------------|
|              | <b>LSD</b>       | <b>p-Value</b> |
| 50nM+NA      | -0.21            | 0.0833         |
| 50nM-NA      | -0.93            | 0.3567         |
| 5nM+NA       | -0.96            | 0.3797         |
| 5nM-NA       | -1.33            | 0.6432         |
| -NA          | -2.41            | 1.0000         |
| +NA          | -2.35            | 1.0000         |

Positive values show pairs of means that are significantly different.

**Oneway Analysis of PI(16:0/22:4) By Label**

**Means Comparisons**

**Comparisons with a control using Dunnett's Method**

Control Group = -NA

|            |              |
|------------|--------------|
| <b> d </b> | <b>Alpha</b> |
| 2.65691    | 0.05         |

| <b>Level</b> | <b>Abs(Dif)-</b> |                |
|--------------|------------------|----------------|
|              | <b>LSD</b>       | <b>p-Value</b> |
| 50nM+NA      | 0.621            | 0.0135 *       |
| 5nM+NA       | 0.014            | 0.0486 *       |
| 50nM-NA      | -1.26            | 0.4140         |
| 5nM-NA       | -1.94            | 0.8178         |
| +NA          | -2.23            | 0.9406         |
| -NA          | -2.99            | 1.0000         |

Positive values show pairs of means that are significantly different.



**Oneway Analysis of PI(16:1/22:4) By Label**

**Means Comparisons**

**Comparisons with a control using Dunnett's Method**

Control Group = -NA

|            |              |
|------------|--------------|
| <b> d </b> | <b>Alpha</b> |
| 2.65691    | 0.05         |

| <b>Level</b> | <b>Abs(Dif)-</b> |                |
|--------------|------------------|----------------|
|              | <b>LSD</b>       | <b>p-Value</b> |
| 50nM+NA      | -0.3             | 0.1030         |
| 50nM-NA      | -0.36            | 0.1183         |
| 5nM+NA       | -0.78            | 0.2857         |
| 5nM-NA       | -1.28            | 0.6374         |
| -NA          | -2.34            | 1.0000         |
| +NA          | -2.23            | 1.0000         |

Positive values show pairs of means that are significantly different.

**Oneway Analysis of Piperidine By Label**

**Means Comparisons**

**Comparisons with a control using Dunnett's Method**

Control Group = -NA

|d|      Alpha  
2.65691      0.05

| Level   | Abs(Dif)- |          |
|---------|-----------|----------|
|         | LSD       | p-Value  |
| 50nM-NA | 4.028     | <.0001 * |
| 5nM-NA  | 2.957     | <.0001 * |
| 5nM+NA  | 0.015     | 0.0459 * |
| 50nM+NA | -0.58     | 0.6355   |
| -NA     | -1.07     | 1.0000   |
| +NA     | 0.477     | 0.0026 * |

Positive values show pairs of means that are significantly different.

**Oneway Analysis of proline By Label**

**Means Comparisons**

**Comparisons with a control using Dunnett's Method**

Control Group = -NA

|d|      Alpha  
2.65691      0.05

| Level   | Abs(Dif)- |          |
|---------|-----------|----------|
|         | LSD       | p-Value  |
| 50nM-NA | 0.465     | <.0001 * |
| -NA     | -0.4      | 1.0000   |
| 5nM-NA  | -0.07     | 0.1288   |
| +NA     | 0.056     | 0.0212 * |
| 5nM+NA  | 0.085     | 0.0134 * |
| 50nM+NA | 0.147     | 0.0047 * |

Positive values show pairs of means that are significantly different.

**Oneway Analysis of purine By Label**

**Means Comparisons**

**Comparisons with a control using Dunnett's Method**

Control Group = -NA

|            |              |
|------------|--------------|
| <b> d </b> | <b>Alpha</b> |
| 2.65691    | 0.05         |

| <b>Level</b> | <b>Abs(Dif)-</b> |                |
|--------------|------------------|----------------|
|              | <b>LSD</b>       | <b>p-Value</b> |
| 50nM-NA      | 0.728            | <.0001 *       |
| 5nM-NA       | 0.677            | <.0001 *       |
| 5nM+NA       | -0.47            | 0.9993         |
| 50nM+NA      | -0.51            | 1.0000         |
| -NA          | -0.52            | 1.0000         |
| +NA          | -0.43            | 0.9896         |

Positive values show pairs of means that are significantly different.

**Oneway Analysis of pyridoxine By Label****Means Comparisons****Comparisons with a control using Dunnett's Method**

Control Group = -NA

|         |       |
|---------|-------|
| d       | Alpha |
| 2.65691 | 0.05  |

| Level   | Abs(Dif)- |         |
|---------|-----------|---------|
|         | LSD       | p-Value |
| 5nM-NA  | -0.27     | 0.3174  |
| 50nM-NA | -0.37     | 0.5254  |
| -NA     | -0.76     | 1.0000  |
| 5nM+NA  | -0.48     | 0.7881  |
| 50nM+NA | -0.3      | 0.3712  |
| +NA     | -0.29     | 0.3597  |

Positive values show pairs of means that are significantly different.

**Oneway Analysis of Pyroglutamate By Label**

**Means Comparisons**

**Comparisons with a control using Dunnett's Method**

Control Group = -NA

|d|      Alpha  
2.65691      0.05

| Level   | Abs(Dif)- |          |
|---------|-----------|----------|
|         | LSD       | p-Value  |
| -NA     | -0.56     | 1.0000   |
| 5nM+NA  | 0.716     | <.0001 * |
| 50nM+NA | 0.749     | <.0001 * |
| +NA     | 0.761     | <.0001 * |
| 5nM-NA  | 0.818     | <.0001 * |
| 50nM-NA | 0.992     | <.0001 * |

Positive values show pairs of means that are significantly different.

**Oneway Analysis of pyruvate By Label**

**Means Comparisons**

**Comparisons with a control using Dunnett's Method**

Control Group = -NA

|            |              |
|------------|--------------|
| <b> d </b> | <b>Alpha</b> |
| 2.65691    | 0.05         |

| <b>Level</b> | <b>Abs(Dif)-<br/>LSD</b> | <b>p-Value</b> |
|--------------|--------------------------|----------------|
| -NA          | -0.84                    | 1.0000         |
| 50nM+NA      | -0.64                    | 0.9576         |
| 5nM+NA       | -0.48                    | 0.6936         |
| 50nM-NA      | -0.47                    | 0.6628         |
| 5nM-NA       | -0.37                    | 0.4442         |
| +NA          | -0.27                    | 0.2740         |

Positive values show pairs of means that are significantly different.

**Oneway Analysis of riboflavin By Label**

**Means Comparisons**

**Comparisons with a control using Dunnett's Method**

Control Group = -NA

|            |              |
|------------|--------------|
| <b> d </b> | <b>Alpha</b> |
| 2.65691    | 0.05         |

| <b>Level</b> | <b>Abs(Dif)-</b> |                |
|--------------|------------------|----------------|
|              | <b>LSD</b>       | <b>p-Value</b> |
| 50nM-NA      | -0.19            | 0.1903         |
| 5nM-NA       | -0.48            | 0.7465         |
| -NA          | -0.79            | 1.0000         |
| 50nM+NA      | -0.16            | 0.1580         |
| 5nM+NA       | -0.03            | 0.0639         |
| +NA          | 0.078            | 0.0274 *       |

Positive values show pairs of means that are significantly different.



**Oneway Analysis of ribose-phosphate By Label**

**Means Comparisons**

**Comparisons with a control using Dunnett's Method**

Control Group = -NA

|         |       |
|---------|-------|
| d       | Alpha |
| 2.65691 | 0.05  |

| Level   | Abs(Dif)- |          |
|---------|-----------|----------|
|         | LSD       | p-Value  |
| 50nM-NA | 1.886     | <.0001 * |
| 5nM-NA  | 0.813     | <.0001 * |
| 50nM+NA | -0.32     | 0.6675   |
| +NA     | -0.45     | 0.9764   |
| 5nM+NA  | -0.5      | 0.9974   |
| -NA     | -0.57     | 1.0000   |

Positive values show pairs of means that are significantly different.

**Oneway Analysis of S-adenosyl-L-homoCysteine By Label**

**Means Comparisons**

**Comparisons with a control using Dunnett's Method**

Control Group = -NA

|            |              |
|------------|--------------|
| <b> d </b> | <b>Alpha</b> |
| 2.65691    | 0.05         |

| <b>Level</b> | <b>Abs(Dif)-</b> |                |
|--------------|------------------|----------------|
|              | <b>LSD</b>       | <b>p-Value</b> |
| 50nM-NA      | 1.421            | <.0001 *       |
| 5nM-NA       | 1.12             | <.0001 *       |
| -NA          | -0.38            | 1.0000         |
| 50nM+NA      | -0.38            | 1.0000         |
| 5nM+NA       | -0.32            | 0.9902         |
| +NA          | -0.19            | 0.5479         |

Positive values show pairs of means that are significantly different.

**Oneway Analysis of S-adenosyl-L-methioninamine By Label**

**Means Comparisons**

**Comparisons with a control using Dunnett's Method**

Control Group = -NA

|            |              |
|------------|--------------|
| <b> d </b> | <b>Alpha</b> |
| 2.65691    | 0.05         |

| <b>Level</b> | <b>Abs(Dif)-</b> |                |
|--------------|------------------|----------------|
|              | <b>LSD</b>       | <b>p-Value</b> |
| 5nM-NA       | -0.78            | 0.9925         |
| 5nM+NA       | -0.81            | 0.9967         |
| 50nM-NA      | -0.9             | 1.0000         |
| -NA          | -0.93            | 1.0000         |
| 50nM+NA      | -0.47            | 0.5635         |
| +NA          | -0.03            | 0.0591         |

Positive values show pairs of means that are significantly different.

|                                        |
|----------------------------------------|
| <b>Oneway Analysis of SAM By Label</b> |
|----------------------------------------|

|                          |
|--------------------------|
| <b>Means Comparisons</b> |
|--------------------------|

|                                                          |
|----------------------------------------------------------|
| <b>Comparisons with a control using Dunnett's Method</b> |
|----------------------------------------------------------|

Control Group = -NA

|            |              |
|------------|--------------|
| <b> d </b> | <b>Alpha</b> |
| 2.65691    | 0.05         |

| <b>Level</b> | <b>Abs(Dif)-</b> |                |
|--------------|------------------|----------------|
|              | <b>LSD</b>       | <b>p-Value</b> |
| 50nM-NA      | 2.686            | <.0001 *       |
| 5nM-NA       | -0.02            | 0.0753         |
| -NA          | -0.33            | 1.0000         |
| 50nM+NA      | 0.523            | <.0001 *       |
| 5nM+NA       | 0.621            | <.0001 *       |
| +NA          | 0.695            | <.0001 *       |

Positive values show pairs of means that are significantly different.

**Oneway Analysis of sarcosine By Label**

**Means Comparisons**

**Comparisons with a control using Dunnett's Method**

Control Group = -NA

|            |              |
|------------|--------------|
| <b> d </b> | <b>Alpha</b> |
| 2.65691    | 0.05         |

| <b>Level</b> | <b>Abs(Dif)-</b> |                |
|--------------|------------------|----------------|
|              | <b>LSD</b>       | <b>p-Value</b> |
| 50nM-NA      | 2.606            | <.0001 *       |
| 5nM-NA       | 1.166            | <.0001 *       |
| -NA          | -0.32            | 1.0000         |
| 50nM+NA      | -0.06            | 0.1435         |
| 5nM+NA       | -0.04            | 0.0988         |
| +NA          | 0.038            | 0.0239 *       |

Positive values show pairs of means that are significantly different.

**Oneway Analysis of Sedoheptulose 7-phosphate By Label**

**Means Comparisons**

**Comparisons with a control using Dunnett's Method**

Control Group = -NA

|            |              |
|------------|--------------|
| <b> d </b> | <b>Alpha</b> |
| 2.65691    | 0.05         |

| <b>Level</b> | <b>Abs(Dif)-</b> |                |
|--------------|------------------|----------------|
|              | <b>LSD</b>       | <b>p-Value</b> |
| 50nM-NA      | 1.862            | <.0001 *       |
| 5nM-NA       | 0.53             | <.0001 *       |
| 50nM+NA      | -0.19            | 1.0000         |
| -NA          | -0.2             | 1.0000         |
| +NA          | -0.2             | 1.0000         |
| 5nM+NA       | -0.18            | 0.9999         |

Positive values show pairs of means that are significantly different.

**Oneway Analysis of serine By Label**

**Means Comparisons**

**Comparisons with a control using Dunnett's Method**

Control Group = -NA

|d|      Alpha  
2.65691      0.05

| Level   | Abs(Dif)- |          |
|---------|-----------|----------|
|         | LSD       | p-Value  |
| 5nM+NA  | -0.15     | 0.1300   |
| 50nM-NA | -0.64     | 0.8999   |
| -NA     | -0.9      | 1.0000   |
| +NA     | -0.69     | 0.9594   |
| 50nM+NA | -0.53     | 0.7070   |
| 5nM-NA  | 0.18      | 0.0142 * |

Positive values show pairs of means that are significantly different.

**Oneway Analysis of S-methyl-5-thioadenosine By Label**

**Means Comparisons**

**Comparisons with a control using Dunnett's Method**

Control Group = -NA

|            |              |
|------------|--------------|
| <b> d </b> | <b>Alpha</b> |
| 2.65691    | 0.05         |

| <b>Level</b> | <b>Abs(Dif)-</b> |                |
|--------------|------------------|----------------|
|              | <b>LSD</b>       | <b>p-Value</b> |
| 5nM-NA       | -2.1             | 0.9997         |
| -NA          | -2.28            | 1.0000         |
| 5nM+NA       | -1.86            | 0.9843         |
| 50nM+NA      | -0.51            | 0.1715         |
| +NA          | -0.39            | 0.1295         |
| 50nM-NA      | -0.26            | 0.0954         |

Positive values show pairs of means that are significantly different.



**Oneway Analysis of sn-glycerol-3-phosphate By Label**

**Means Comparisons**

**Comparisons with a control using Dunnett's Method**

Control Group = -NA

|         |       |
|---------|-------|
| d       | Alpha |
| 2.65691 | 0.05  |

| Level   | Abs(Dif)- |         |
|---------|-----------|---------|
|         | LSD       | p-Value |
| 5nM-NA  | -1.54     | 0.9994  |
| -NA     | -1.69     | 1.0000  |
| 50nM+NA | -1.67     | 1.0000  |
| 5nM+NA  | -1.29     | 0.9554  |
| 50nM-NA | -1.17     | 0.8813  |
| +NA     | -0.98     | 0.6943  |

Positive values show pairs of means that are significantly different.

**Oneway Analysis of Spermidine By Label**

**Means Comparisons**

**Comparisons with a control using Dunnett's Method**

Control Group = -NA

|            |              |
|------------|--------------|
| <b> d </b> | <b>Alpha</b> |
| 2.65691    | 0.05         |

| <b>Level</b> | <b>Abs(Dif)-</b> |                |
|--------------|------------------|----------------|
|              | <b>LSD</b>       | <b>p-Value</b> |
| 50nM-NA      | 1.423            | <.0001 *       |
| 5nM-NA       | -0.03            | 0.0960         |
| -NA          | -0.3             | 1.0000         |
| 5nM+NA       | -0.23            | 0.9501         |
| 50nM+NA      | -0.21            | 0.8665         |
| +NA          | -0.2             | 0.8458         |

Positive values show pairs of means that are significantly different.

**Oneway Analysis of Spermine By Label**

**Means Comparisons**

**Comparisons with a control using Dunnett's Method**

Control Group = -NA

|d|      Alpha  
2.65691      0.05

| Level   | Abs(Dif)- |          |
|---------|-----------|----------|
|         | LSD       | p-Value  |
| 50nM-NA | 1.546     | 0.0007 * |
| 5nM+NA  | -2.22     | 0.9994   |
| -NA     | -2.45     | 1.0000   |
| +NA     | -1.89     | 0.9616   |
| 5nM-NA  | -1.38     | 0.6665   |
| 50nM+NA | -1.38     | 0.6665   |

Positive values show pairs of means that are significantly different.

**Oneway Analysis of Stearic acid By Label**

**Means Comparisons**

**Comparisons with a control using Dunnett's Method**

Control Group = -NA

|            |              |
|------------|--------------|
| <b> d </b> | <b>Alpha</b> |
| 2.65691    | 0.05         |

| <b>Level</b> | <b>Abs(Dif)-</b> |                |
|--------------|------------------|----------------|
|              | <b>LSD</b>       | <b>p-Value</b> |
| 5nM-NA       | -3.25            | 0.5706         |
| -NA          | -6.34            | 1.0000         |
| 50nM+NA      | -4.62            | 0.9217         |
| +NA          | -4.6             | 0.9194         |
| 5nM+NA       | -4.03            | 0.7933         |
| 50nM-NA      | -3.82            | 0.7379         |

Positive values show pairs of means that are significantly different.

**Oneway Analysis of succinate By Label**

**Means Comparisons**

**Comparisons with a control using Dunnett's Method**

Control Group = -NA

|            |              |
|------------|--------------|
| <b> d </b> | <b>Alpha</b> |
| 2.65691    | 0.05         |

| <b>Level</b> | <b>Abs(Dif)-</b> |                |
|--------------|------------------|----------------|
|              | <b>LSD</b>       | <b>p-Value</b> |
| 5nM+NA       | 0.565            | <.0001 *       |
| 50nM+NA      | 0.351            | 0.0006 *       |
| +NA          | 0.317            | 0.0009 *       |
| -NA          | -0.53            | 1.0000         |
| 50nM-NA      | -0.1             | 0.1386         |
| 5nM-NA       | -0.07            | 0.1007         |

Positive values show pairs of means that are significantly different.

**Oneway Analysis of taurine By Label**

**Means Comparisons**

**Comparisons with a control using Dunnett's Method**

Control Group = -NA

|            |              |
|------------|--------------|
| <b> d </b> | <b>Alpha</b> |
| 2.65691    | 0.05         |

| <b>Level</b> | <b>Abs(Dif)-</b> |                |
|--------------|------------------|----------------|
|              | <b>LSD</b>       | <b>p-Value</b> |
| 50nM-NA      | -0.79            | 0.9970         |
| 5nM-NA       | -0.83            | 0.9995         |
| -NA          | -0.9             | 1.0000         |
| 50nM+NA      | -0.78            | 0.9963         |
| 5nM+NA       | -0.68            | 0.9454         |
| +NA          | -0.34            | 0.3516         |

Positive values show pairs of means that are significantly different.

**Oneway Analysis of thiamine By Label**

**Means Comparisons**

**Comparisons with a control using Dunnett's Method**

Control Group = -NA

|            |              |
|------------|--------------|
| <b> d </b> | <b>Alpha</b> |
| 2.65691    | 0.05         |

| <b>Level</b> | <b>Abs(Dif)-</b> |                |
|--------------|------------------|----------------|
|              | <b>LSD</b>       | <b>p-Value</b> |
| 50nM-NA      | -0.1             | 0.1088         |
| 5nM-NA       | -0.15            | 0.1590         |
| -NA          | -0.71            | 1.0000         |
| 5nM+NA       | -0.43            | 0.7549         |
| 50nM+NA      | -0.29            | 0.3832         |
| +NA          | -0.22            | 0.2589         |

Positive values show pairs of means that are significantly different.

**Oneway Analysis of threonine By Label**

**Means Comparisons**

**Comparisons with a control using Dunnett's Method**

Control Group = -NA

|         |       |
|---------|-------|
| d       | Alpha |
| 2.65691 | 0.05  |

| Level   | Abs(Dif)- |          |
|---------|-----------|----------|
|         | LSD       | p-Value  |
| 5nM-NA  | 0.72      | <.0001 * |
| 50nM-NA | 0.588     | <.0001 * |
| 5nM+NA  | 0.024     | 0.0394 * |
| 50nM+NA | -0.13     | 0.1591   |
| +NA     | -0.23     | 0.3470   |
| -NA     | -0.6      | 1.0000   |

Positive values show pairs of means that are significantly different.



**Oneway Analysis of thymidine By Label**

**Means Comparisons**

**Comparisons with a control using Dunnett's Method**

Control Group = -NA

|            |              |
|------------|--------------|
| <b> d </b> | <b>Alpha</b> |
| 2.65691    | 0.05         |

| <b>Level</b> | <b>Abs(Dif)-<br/>LSD</b> | <b>p-Value</b> |
|--------------|--------------------------|----------------|
| 5nM-NA       | -0.72                    | 0.5490         |
| 5nM+NA       | -0.97                    | 0.8488         |
| 50nM-NA      | -1.05                    | 0.9198         |
| 50nM+NA      | -1.07                    | 0.9338         |
| -NA          | -1.45                    | 1.0000         |
| +NA          | -1.24                    | 0.9943         |

Positive values show pairs of means that are significantly different.

**Oneway Analysis of trans, trans-farnesyl diphosphate By Label**

**Means Comparisons**

**Comparisons with a control using Dunnett's Method**

Control Group = -NA

|            |              |
|------------|--------------|
| <b> d </b> | <b>Alpha</b> |
| 2.65691    | 0.05         |

| <b>Level</b> | <b>Abs(Dif)-</b> |                |
|--------------|------------------|----------------|
|              | <b>LSD</b>       | <b>p-Value</b> |
| +NA          | 0.327            | 0.0124 *       |
| 50nM+NA      | -0.2             | 0.1076         |
| 5nM-NA       | -0.75            | 0.5582         |
| 5nM+NA       | -1.06            | 0.9109         |
| 50nM-NA      | -1.19            | 0.9781         |
| -NA          | -1.48            | 1.0000         |

Positive values show pairs of means that are significantly different.

|                                               |
|-----------------------------------------------|
| <b>Oneway Analysis of tryptophan By Label</b> |
|-----------------------------------------------|

|                          |
|--------------------------|
| <b>Means Comparisons</b> |
|--------------------------|

|                                                          |
|----------------------------------------------------------|
| <b>Comparisons with a control using Dunnett's Method</b> |
|----------------------------------------------------------|

Control Group = -NA

|            |              |
|------------|--------------|
| <b> d </b> | <b>Alpha</b> |
| 2.65691    | 0.05         |

| <b>Level</b> | <b>Abs(Dif)-</b> |                |
|--------------|------------------|----------------|
|              | <b>LSD</b>       | <b>p-Value</b> |
| 50nM-NA      | 0.936            | <.0001 *       |
| 5nM-NA       | 0.62             | <.0001 *       |
| 5nM+NA       | -0.13            | 0.1859         |
| 50nM+NA      | -0.24            | 0.4801         |
| +NA          | -0.47            | 0.9991         |
| -NA          | -0.52            | 1.0000         |

Positive values show pairs of means that are significantly different.

**Oneway Analysis of tyrosine By Label**

**Means Comparisons**

**Comparisons with a control using Dunnett's Method**

Control Group = -NA

|         |       |
|---------|-------|
| d       | Alpha |
| 2.65691 | 0.05  |

| Level   | Abs(Dif)- |          |
|---------|-----------|----------|
|         | LSD       | p-Value  |
| 50nM-NA | 0.77      | <.0001 * |
| 5nM-NA  | 0.631     | <.0001 * |
| 5nM+NA  | -0.18     | 0.2819   |
| 50nM+NA | -0.3      | 0.6663   |
| +NA     | -0.42     | 0.9699   |
| -NA     | -0.53     | 1.0000   |

Positive values show pairs of means that are significantly different.

**Oneway Analysis of UDP By Label**

**Means Comparisons**

**Comparisons with a control using Dunnett's Method**

Control Group = -NA

|            |              |
|------------|--------------|
| <b> d </b> | <b>Alpha</b> |
| 2.65691    | 0.05         |

| <b>Level</b> | <b>Abs(Dif)-</b> |                |
|--------------|------------------|----------------|
|              | <b>LSD</b>       | <b>p-Value</b> |
| +NA          | 1.158            | <.0001 *       |
| 5nM+NA       | 1.032            | <.0001 *       |
| 50nM+NA      | 0.945            | <.0001 *       |
| 50nM-NA      | -0.5             | 1.0000         |
| 5nM-NA       | -0.5             | 1.0000         |
| -NA          | -0.5             | 1.0000         |

Positive values show pairs of means that are significantly different.

**Oneway Analysis of UDP-D-glucuronate By Label**

**Means Comparisons**

**Comparisons with a control using Dunnett's Method**

Control Group = -NA

|            |              |
|------------|--------------|
| <b> d </b> | <b>Alpha</b> |
| 2.65691    | 0.05         |

| <b>Level</b> | <b>Abs(Dif)-</b> |                |
|--------------|------------------|----------------|
|              | <b>LSD</b>       | <b>p-Value</b> |
| 50nM+NA      | 0.062            | 0.0237 *       |
| 5nM+NA       | -0.26            | 0.5506         |
| -NA          | -0.51            | 1.0000         |
| +NA          | -0.41            | 0.9806         |
| 5nM-NA       | 0.908            | <.0001 *       |
| 50nM-NA      | 1.514            | <.0001 *       |

Positive values show pairs of means that are significantly different.

**Oneway Analysis of UDP-glucose By Label**

**Means Comparisons**

**Comparisons with a control using Dunnett's Method**

Control Group = -NA

|            |              |
|------------|--------------|
| <b> d </b> | <b>Alpha</b> |
| 2.65691    | 0.05         |

| <b>Level</b> | <b>Abs(Dif)-</b> |                |
|--------------|------------------|----------------|
|              | <b>LSD</b>       | <b>p-Value</b> |
| 5nM+NA       | -0.55            | 0.3696         |
| 50nM+NA      | -0.95            | 0.8580         |
| 5nM-NA       | -1.17            | 0.9883         |
| +NA          | -1.28            | 0.9992         |
| -NA          | -1.41            | 1.0000         |
| 50nM-NA      | 1.426            | <.0001 *       |

Positive values show pairs of means that are significantly different.

**Oneway Analysis of UDP-N-acetyl-glucosamine By Label**

**Means Comparisons**

**Comparisons with a control using Dunnett's Method**

Control Group = -NA

|d|      Alpha  
2.65691      0.05

| Level   | Abs(Dif)- |          |
|---------|-----------|----------|
|         | LSD       | p-Value  |
| -NA     | -0.46     | 1.0000   |
| 50nM+NA | -0.11     | 0.1904   |
| 5nM+NA  | -0.07     | 0.1208   |
| +NA     | 0.088     | 0.0153 * |
| 5nM-NA  | 0.476     | <.0001 * |
| 50nM-NA | 1.348     | <.0001 * |

Positive values show pairs of means that are significantly different.



**Oneway Analysis of uracil By Label****Means Comparisons****Comparisons with a control using Dunnett's Method**

Control Group = -NA

|            |              |
|------------|--------------|
| <b> d </b> | <b>Alpha</b> |
| 2.65691    | 0.05         |

| <b>Level</b> | <b>Abs(Dif)-</b> |                |
|--------------|------------------|----------------|
|              | <b>LSD</b>       | <b>p-Value</b> |
| 50nM+NA      | -0.37            | 0.2746         |
| +NA          | -0.55            | 0.5044         |
| 5nM+NA       | -0.81            | 0.8933         |
| 5nM-NA       | -0.92            | 0.9782         |
| -NA          | -1.15            | 1.0000         |
| 50nM-NA      | -1.03            | 0.9988         |

Positive values show pairs of means that are significantly different.

**Oneway Analysis of Uric acid By Label**

**Means Comparisons**

**Comparisons with a control using Dunnett's Method**

Control Group = -NA

|d|      Alpha  
2.65691      0.05

| Level   | Abs(Dif)- |         |
|---------|-----------|---------|
|         | LSD       | p-Value |
| 50nM+NA | -0.69     | 0.7623  |
| 5nM+NA  | -0.84     | 0.9417  |
| 50nM-NA | -0.89     | 0.9735  |
| -NA     | -1.12     | 1.0000  |
| 5nM-NA  | -1.1      | 1.0000  |
| +NA     | -1.02     | 0.9994  |

Positive values show pairs of means that are significantly different.

**Oneway Analysis of UTP By Label**

**Means Comparisons**

**Comparisons with a control using Dunnett's Method**

Control Group = -NA

|            |              |
|------------|--------------|
| <b> d </b> | <b>Alpha</b> |
| 2.65691    | 0.05         |

| <b>Level</b> | <b>Abs(Dif)-<br/>LSD</b> | <b>p-Value</b> |
|--------------|--------------------------|----------------|
| +NA          | -0.22                    | 0.2937         |
| 5nM+NA       | -0.32                    | 0.5162         |
| -NA          | -0.66                    | 1.0000         |
| 50nM+NA      | -0.64                    | 1.0000         |
| 5nM-NA       | -0.64                    | 1.0000         |
| 50nM-NA      | 0.393                    | 0.0009 *       |

Positive values show pairs of means that are significantly different.

|                                           |
|-------------------------------------------|
| <b>Oneway Analysis of valine By Label</b> |
|-------------------------------------------|

|                          |
|--------------------------|
| <b>Means Comparisons</b> |
|--------------------------|

|                                                          |
|----------------------------------------------------------|
| <b>Comparisons with a control using Dunnett's Method</b> |
|----------------------------------------------------------|

Control Group = -NA

|            |              |
|------------|--------------|
| <b> d </b> | <b>Alpha</b> |
| 2.65691    | 0.05         |

| <b>Level</b> | <b>Abs(Dif)-</b> |                |
|--------------|------------------|----------------|
|              | <b>LSD</b>       | <b>p-Value</b> |
| 50nM-NA      | 0.559            | <.0001 *       |
| 5nM-NA       | 0.481            | 0.0002 *       |
| 5nM+NA       | -0.34            | 0.6900         |
| 50nM+NA      | -0.52            | 0.9972         |
| -NA          | -0.6             | 1.0000         |
| +NA          | -0.58            | 1.0000         |

Positive values show pairs of means that are significantly different.

**Oneway Analysis of xanthine By Label**

**Means Comparisons**

**Comparisons with a control using Dunnett's Method**

Control Group = -NA

|            |              |
|------------|--------------|
| <b> d </b> | <b>Alpha</b> |
| 2.65691    | 0.05         |

| <b>Level</b> | <b>Abs(Dif)-</b> |                |
|--------------|------------------|----------------|
|              | <b>LSD</b>       | <b>p-Value</b> |
| 50nM-NA      | 2.963            | <.0001 *       |
| 5nM-NA       | -0.48            | 0.9689         |
| -NA          | -0.61            | 1.0000         |
| 50nM+NA      | -0.45            | 0.9234         |
| 5nM+NA       | -0.44            | 0.9132         |
| +NA          | -0.2             | 0.2725         |

Positive values show pairs of means that are significantly different.

**Oneway Analysis of Xanthurenic acid By Label**

**Means Comparisons**

**Comparisons with a control using Dunnett's Method**

Control Group = -NA

|         |       |
|---------|-------|
| d       | Alpha |
| 2.65691 | 0.05  |

| Level   | Abs(Dif)- |          |
|---------|-----------|----------|
|         | LSD       | p-Value  |
| 5nM+NA  | 1.012     | <.0001 * |
| 50nM-NA | 0.897     | <.0001 * |
| 50nM+NA | 0.844     | <.0001 * |
| +NA     | 0.671     | 0.0002 * |
| 5nM-NA  | 0.279     | 0.0054 * |
| -NA     | -0.81     | 1.0000   |

Positive values show pairs of means that are significantly different.
