# Supplementary material for: Metabolomics Analysis of Metabolic Effects of Nicotinamide Phosphoribosyltransferase (NAMPT) Inhibition on Human Cancer Cells
Source: PLoS One. 2014 Dec 8;9(12):e114019. doi: 10.1371/journal.pone.0114019 (PMC4259317; doi:10.1371/journal.pone.0114019)
Supplement: S4 File — A2780 one-way analysis of variance results. (PDF) [file pone.0114019.s004.pdf]

# Oneway Analysis of 1-(5Z,8Z,11Z,14Z-eicosatetraenoyl)-sn-glycero-3-phosphocholine By Label

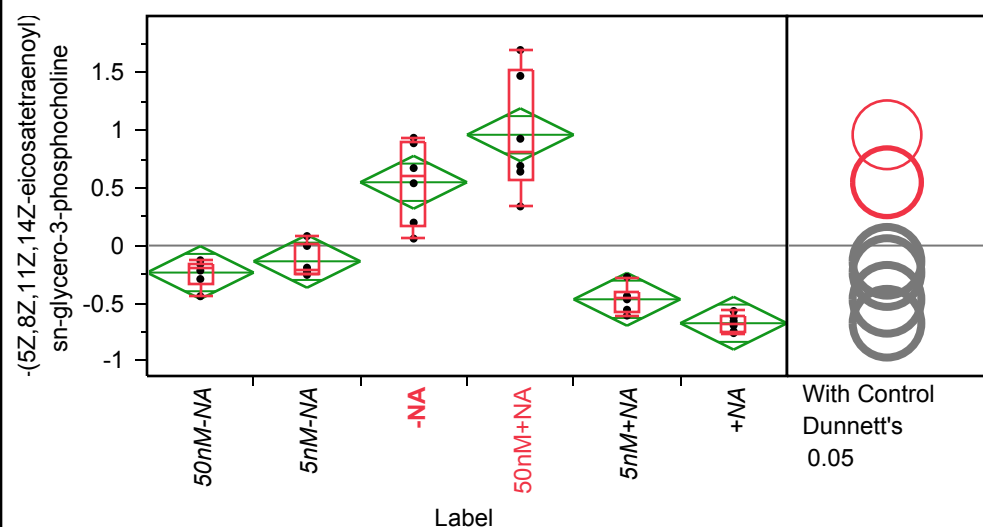

## Quantiles

| Level   | Minimum  | 10%      | 25%      | Median   | 75%      | 90%      | Maximum  |
|---------|----------|----------|----------|----------|----------|----------|----------|
| 50nM-NA | -0.44019 | -0.44019 | -0.32821 | -0.19323 | -0.15345 | -0.12762 | -0.12762 |
| 5nM-NA  | -0.25461 | -0.25461 | -0.23942 | -0.20512 | 0.018235 | 0.082412 | 0.082412 |
| -NA     | 0.060494 | 0.060494 | 0.164884 | 0.607386 | 0.900878 | 0.93608  | 0.93608  |
| 50nM+NA | 0.339986 | 0.339986 | 0.566507 | 0.810113 | 1.530201 | 1.698774 | 1.698774 |
| 5nM+NA  | -0.60816 | -0.60816 | -0.57031 | -0.46121 | -0.39766 | -0.27322 | -0.27322 |
| +NA     | -0.76048 | -0.76048 | -0.74889 | -0.67463 | -0.61032 | -0.56831 | -0.56831 |

## Oneway Anova

### Summary of Fit

|                            |          |
|----------------------------|----------|
| Rsquare                    | 0.839325 |
| Adj Rsquare                | 0.812546 |
| Root Mean Square Error     | 0.275021 |
| Mean of Response           | 2.47e-17 |
| Observations (or Sum Wgts) | 36       |

### Analysis of Variance

| Source   | DF | Sum of Squares | Mean Square | F Ratio | Prob > F |
|----------|----|----------------|-------------|---------|----------|
| Label    | 5  | 11.853238      | 2.37065     | 31.3425 | <.0001 * |
| Error    | 30 | 2.269103       | 0.07564     |         |          |
| C. Total | 35 | 14.122341      |             |         |          |

### Means for Oneway Anova

| Level   | Number | Mean     | Std Error | Lower 95% | Upper 95% |
|---------|--------|----------|-----------|-----------|-----------|
| 50nM-NA | 6      | -0.23453 | 0.11228   | -0.4638   | -0.0052   |
| 5nM-NA  | 6      | -0.13666 | 0.11228   | -0.3660   | 0.093     |
| -NA     | 6      | 0.55003  | 0.11228   | 0.3207    | 0.779     |
| 50nM+NA | 6      | 0.96250  | 0.11228   | 0.7332    | 1.192     |
| 5nM+NA  | 6      | -0.46677 | 0.11228   | -0.6961   | -0.237    |
| +NA     | 6      | -0.67457 | 0.11228   | -0.9039   | -0.445    |

Std Error uses a pooled estimate of error variance

## Means Comparisons

### Comparisons with a control using Dunnett's Method

# Oneway Analysis of 1,3-diphosphoglycerate By Label

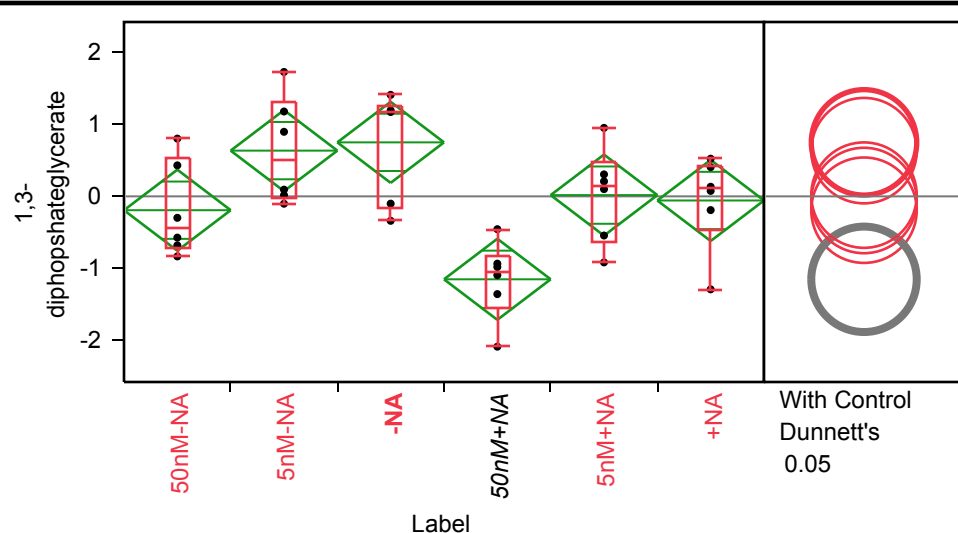

## Quantiles

| Level   | Minimum  | 10%      | 25%      | Median   | 75%      | 90%      | Maximum  |
|---------|----------|----------|----------|----------|----------|----------|----------|
| 50nM-NA | -0.83522 | -0.83522 | -0.7202  | -0.43644 | 0.523987 | 0.803017 | 0.803017 |
| 5nM-NA  | -0.10242 | -0.10242 | -0.01339 | 0.49556  | 1.317685 | 1.729966 | 1.729966 |
| -NA     | -0.34009 | -0.34009 | -0.16123 | 1.169604 | 1.250151 | 1.411665 | 1.411665 |
| 50nM+NA | -2.09097 | -2.09097 | -1.54247 | -1.03944 | -0.81622 | -0.45671 | -0.45671 |
| 5nM+NA  | -0.91848 | -0.91848 | -0.6383  | 0.154178 | 0.467099 | 0.952202 | 0.952202 |
| +NA     | -1.29328 | -1.29328 | -0.46655 | 0.104647 | 0.435666 | 0.523541 | 0.523541 |

## Oneway Anova

### Summary of Fit

|                            |          |
|----------------------------|----------|
| Rsquare                    | 0.50598  |
| Adj Rsquare                | 0.423643 |
| Root Mean Square Error     | 0.675966 |
| Mean of Response           | 2.78e-10 |
| Observations (or Sum Wgts) | 36       |

### Analysis of Variance

| Source   | DF | Sum of Squares | Mean Square | F Ratio | Prob > F |
|----------|----|----------------|-------------|---------|----------|
| Label    | 5  | 14.039775      | 2.80796     | 6.1453  | 0.0005 * |
| Error    | 30 | 13.707920      | 0.45693     |         |          |
| C. Total | 35 | 27.747695      |             |         |          |

### Means for Oneway Anova

| Level   | Number | Mean    | Std Error | Lower 95% | Upper 95% |
|---------|--------|---------|-----------|-----------|-----------|
| 50nM-NA | 6      | -0.1927 | 0.27596   | -0.756    | 0.371     |
| 5nM-NA  | 6      | 0.6359  | 0.27596   | 0.072     | 1.199     |
| -NA     | 6      | 0.7509  | 0.27596   | 0.187     | 1.315     |
| 50nM+NA | 6      | -1.1537 | 0.27596   | -1.717    | -0.590    |
| 5nM+NA  | 6      | 0.0171  | 0.27596   | -0.546    | 0.581     |
| +NA     | 6      | -0.0575 | 0.27596   | -0.621    | 0.506     |

Std Error uses a pooled estimate of error variance

## Means Comparisons

### Comparisons with a control using Dunnett's Method

### Oneway Analysis of 1-Aminocyclopropanecarboxylic acid By Label

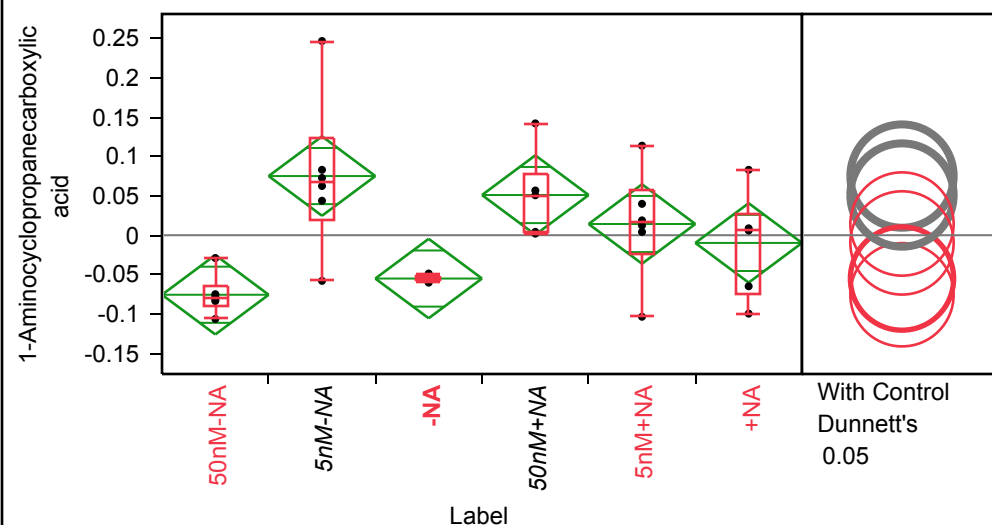

#### Quantiles

| Level   | Minimum  | 10%      | 25%      | Median   | 75%      | 90%      | Maximum  |
|---------|----------|----------|----------|----------|----------|----------|----------|
| 50nM-NA | -0.10638 | -0.10638 | -0.08932 | -0.07992 | -0.06347 | -0.02907 | -0.02907 |
| 5nM-NA  | -0.058   | -0.058   | 0.018364 | 0.06767  | 0.124014 | 0.246799 | 0.246799 |
| -NA     | -0.06024 | -0.06024 | -0.058   | -0.05514 | -0.05262 | -0.04865 | -0.04865 |
| 50nM+NA | 0.002025 | 0.002025 | 0.003683 | 0.050625 | 0.078143 | 0.14209  | 0.14209  |
| 5nM+NA  | -0.10359 | -0.10359 | -0.02276 | 0.015626 | 0.058336 | 0.113769 | 0.113769 |
| +NA     | -0.0996  | -0.0996  | -0.07355 | 0.006943 | 0.02735  | 0.083087 | 0.083087 |

#### Oneway Anova

##### Summary of Fit

|                            |          |
|----------------------------|----------|
| Rsquare                    | 0.486075 |
| Adj Rsquare                | 0.40042  |
| Root Mean Square Error     | 0.060504 |
| Mean of Response           | -2.8e-11 |
| Observations (or Sum Wgts) | 36       |

##### Analysis of Variance

| Source   | DF | Sum of Squares | Mean Square | F Ratio | Prob > F |
|----------|----|----------------|-------------|---------|----------|
| Label    | 5  | 0.10386893     | 0.020774    | 5.6748  | 0.0008 * |
| Error    | 30 | 0.10982031     | 0.003661    |         |          |
| C. Total | 35 | 0.21368924     |             |         |          |

##### Means for Oneway Anova

| Level   | Number | Mean     | Std Error | Lower 95% | Upper 95% |
|---------|--------|----------|-----------|-----------|-----------|
| 50nM-NA | 6      | -0.07564 | 0.02470   | -0.1261   | -0.0252   |
| 5nM-NA  | 6      | 0.07517  | 0.02470   | 0.0247    | 0.1256    |
| -NA     | 6      | -0.05506 | 0.02470   | -0.1055   | -0.0046   |
| 50nM+NA | 6      | 0.05107  | 0.02470   | 0.00063   | 0.1015    |
| 5nM+NA  | 6      | 0.01424  | 0.02470   | -0.0362   | 0.0647    |
| +NA     | 6      | -0.00979 | 0.02470   | -0.0602   | 0.0407    |

Std Error uses a pooled estimate of error variance

#### Means Comparisons

##### Comparisons with a control using Dunnett's Method

### Oneway Analysis of 1-Hexadecyl-2-arachidonoyl-glycerol By Label

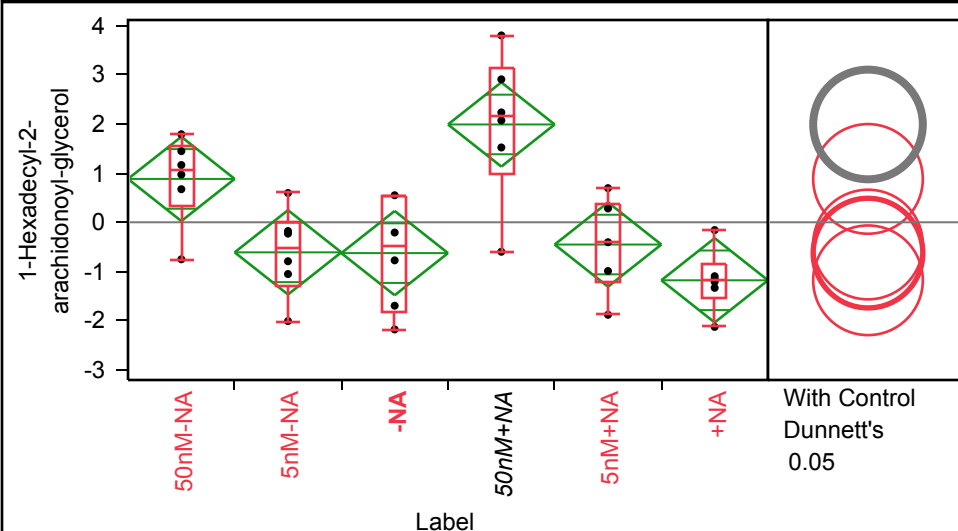

### Quantiles

| Level   | Minimum  | 10%      | 25%      | Median   | 75%      | 90%      | Maximum  |
|---------|----------|----------|----------|----------|----------|----------|----------|
| 50nM-NA | -0.75173 | -0.75173 | 0.31588  | 1.065503 | 1.53032  | 1.787532 | 1.787532 |
| 5nM-NA  | -2.00659 | -2.00659 | -1.29038 | -0.51095 | 0.01535  | 0.594904 | 0.594904 |
| -NA     | -2.17586 | -2.17586 | -1.81476 | -0.49051 | 0.545714 | 0.54885  | 0.54885  |
| 50nM+NA | -0.5986  | -0.5986  | 0.989672 | 2.150331 | 3.125968 | 3.794784 | 3.794784 |
| 5nM+NA  | -1.87873 | -1.87873 | -1.21245 | -0.40833 | 0.383646 | 0.692954 | 0.692954 |
| +NA     | -2.1245  | -2.1245  | -1.52987 | -1.17947 | -0.86134 | -0.15824 | -0.15824 |

### Oneway Anova

#### Summary of Fit

|                            |          |
|----------------------------|----------|
| Rsquare                    | 0.573316 |
| Adj Rsquare                | 0.502202 |
| Root Mean Square Error     | 1.026488 |
| Mean of Response           | 8.333e-9 |
| Observations (or Sum Wgts) | 36       |

#### Analysis of Variance

| Source   | DF | Sum of Squares | Mean Square | F Ratio | Prob > F |
|----------|----|----------------|-------------|---------|----------|
| Label    | 5  | 42.473310      | 8.49466     | 8.0619  | <.0001 * |
| Error    | 30 | 31.610313      | 1.05368     |         |          |
| C. Total | 35 | 74.083623      |             |         |          |

#### Means for Oneway Anova

| Level   | Number | Mean    | Std Error | Lower 95% | Upper 95% |
|---------|--------|---------|-----------|-----------|-----------|
| 50nM-NA | 6      | 0.8805  | 0.41906   | 0.025     | 1.736     |
| 5nM-NA  | 6      | -0.6105 | 0.41906   | -1.466    | 0.245     |
| -NA     | 6      | -0.6263 | 0.41906   | -1.482    | 0.230     |
| 50nM+NA | 6      | 1.9865  | 0.41906   | 1.131     | 2.842     |
| 5nM+NA  | 6      | -0.4520 | 0.41906   | -1.308    | 0.404     |
| +NA     | 6      | -1.1782 | 0.41906   | -2.034    | -0.322    |

Std Error uses a pooled estimate of error variance

### Means Comparisons

#### Comparisons with a control using Dunnett's Method

### Oneway Analysis of 1-Methyladenosine By Label

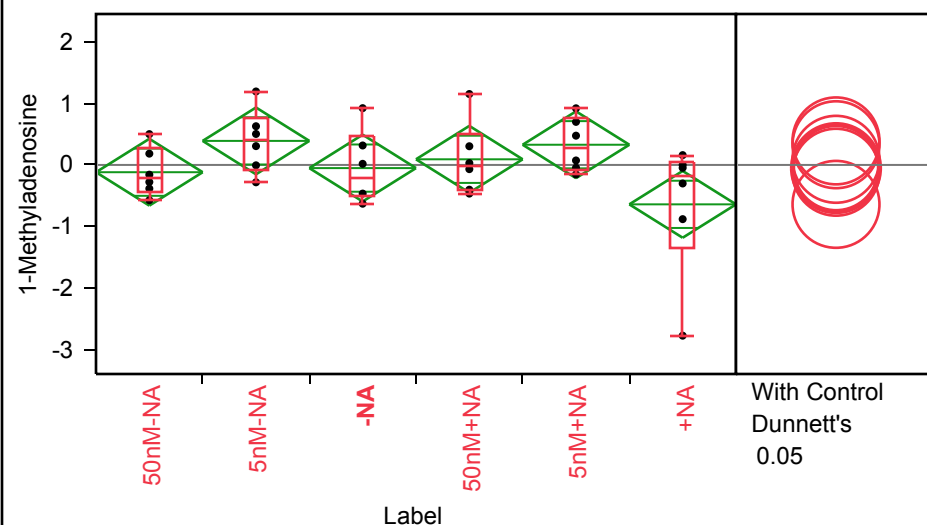

### Quantiles

| Level   | Minimum  | 10%      | 25%      | Median   | 75%      | 90%      | Maximum  |
|---------|----------|----------|----------|----------|----------|----------|----------|
| 50nM-NA | -0.57262 | -0.57262 | -0.43101 | -0.21782 | 0.262424 | 0.500071 | 0.500071 |
| 5nM-NA  | -0.28172 | -0.28172 | -0.07517 | 0.404088 | 0.769274 | 1.192352 | 1.192352 |
| -NA     | -0.62935 | -0.62935 | -0.5088  | -0.22373 | 0.467101 | 0.921483 | 0.921483 |
| 50nM+NA | -0.46508 | -0.46508 | -0.41781 | -0.01926 | 0.515246 | 1.150932 | 1.150932 |
| 5nM+NA  | -0.15328 | -0.15328 | -0.0724  | 0.273701 | 0.753904 | 0.919208 | 0.919208 |
| +NA     | -2.77138 | -2.77138 | -1.35284 | -0.17401 | 0.040715 | 0.159188 | 0.159188 |

### Oneway Anova

#### Summary of Fit

|                            |          |
|----------------------------|----------|
| Rsquare                    | 0.247159 |
| Adj Rsquare                | 0.121685 |
| Root Mean Square Error     | 0.650204 |
| Mean of Response           | 2.78e-11 |
| Observations (or Sum Wgts) | 36       |

#### Analysis of Variance

| Source   | DF | Sum of Squares | Mean Square | F Ratio | Prob > F |
|----------|----|----------------|-------------|---------|----------|
| Label    | 5  | 4.163836       | 0.832767    | 1.9698  | 0.1121   |
| Error    | 30 | 12.682969      | 0.422766    |         |          |
| C. Total | 35 | 16.846805      |             |         |          |

#### Means for Oneway Anova

| Level   | Number | Mean     | Std Error | Lower 95% | Upper 95% |
|---------|--------|----------|-----------|-----------|-----------|
| 50nM-NA | 6      | -0.11813 | 0.26544   | -0.660    | 0.4240    |
| 5nM-NA  | 6      | 0.39012  | 0.26544   | -0.152    | 0.9322    |
| -NA     | 6      | -0.05138 | 0.26544   | -0.593    | 0.4907    |
| 50nM+NA | 6      | 0.09144  | 0.26544   | -0.451    | 0.6335    |
| 5nM+NA  | 6      | 0.32778  | 0.26544   | -0.214    | 0.8699    |
| +NA     | 6      | -0.63983 | 0.26544   | -1.182    | -0.0977   |

Std Error uses a pooled estimate of error variance

### Means Comparisons

#### Comparisons with a control using Dunnett's Method

### Oneway Analysis of 1-Methyl-Histidine By Label

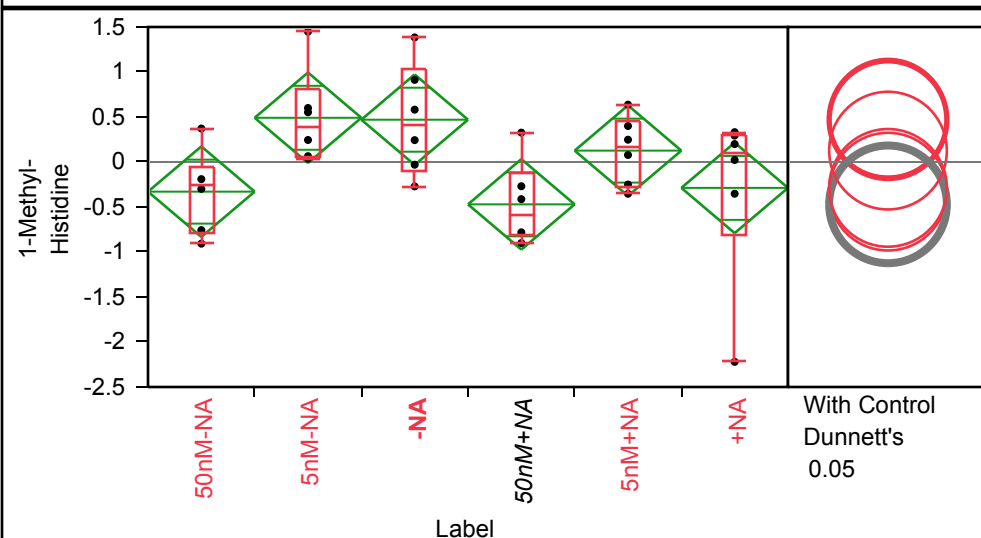

### Quantiles

| Level   | Minimum  | 10%      | 25%      | Median   | 75%      | 90%      | Maximum  |
|---------|----------|----------|----------|----------|----------|----------|----------|
| 50nM-NA | -0.90729 | -0.90729 | -0.79465 | -0.24659 | -0.04987 | 0.371832 | 0.371832 |
| 5nM-NA  | 0.03814  | 0.03814  | 0.058013 | 0.398363 | 0.811807 | 1.44776  | 1.44776  |
| -NA     | -0.27105 | -0.27105 | -0.09035 | 0.412185 | 1.030425 | 1.384041 | 1.384041 |
| 50nM+NA | -0.90041 | -0.90041 | -0.81424 | -0.59734 | -0.12049 | 0.32622  | 0.32622  |
| 5nM+NA  | -0.35303 | -0.35303 | -0.27623 | 0.162939 | 0.459017 | 0.636851 | 0.636851 |
| +NA     | -2.22052 | -2.22052 | -0.81953 | 0.110959 | 0.303224 | 0.331671 | 0.331671 |

### Oneway Anova

#### Summary of Fit

|                            |          |
|----------------------------|----------|
| Rsquare                    | 0.329034 |
| Adj Rsquare                | 0.217206 |
| Root Mean Square Error     | 0.602753 |
| Mean of Response           | 5.56e-10 |
| Observations (or Sum Wgts) | 36       |

#### Analysis of Variance

| Source   | DF | Sum of Squares | Mean Square | F Ratio | Prob > F |
|----------|----|----------------|-------------|---------|----------|
| Label    | 5  | 5.344907       | 1.06898     | 2.9423  | 0.0281 * |
| Error    | 30 | 10.899353      | 0.36331     |         |          |
| C. Total | 35 | 16.244260      |             |         |          |

#### Means for Oneway Anova

| Level   | Number | Mean     | Std Error | Lower 95% | Upper 95% |
|---------|--------|----------|-----------|-----------|-----------|
| 50nM-NA | 6      | -0.32936 | 0.24607   | -0.8319   | 0.17319   |
| 5nM-NA  | 6      | 0.49118  | 0.24607   | -0.0114   | 0.99373   |
| -NA     | 6      | 0.46996  | 0.24607   | -0.0326   | 0.97251   |
| 50nM+NA | 6      | -0.47063 | 0.24607   | -0.9732   | 0.03192   |
| 5nM+NA  | 6      | 0.12647  | 0.24607   | -0.3761   | 0.62902   |
| +NA     | 6      | -0.28762 | 0.24607   | -0.7902   | 0.21493   |

Std Error uses a pooled estimate of error variance

### Means Comparisons

#### Comparisons with a control using Dunnett's Method

### Oneway Analysis of 1-Octadecanoyl-sn-glycero-3-phosphocholine By Label

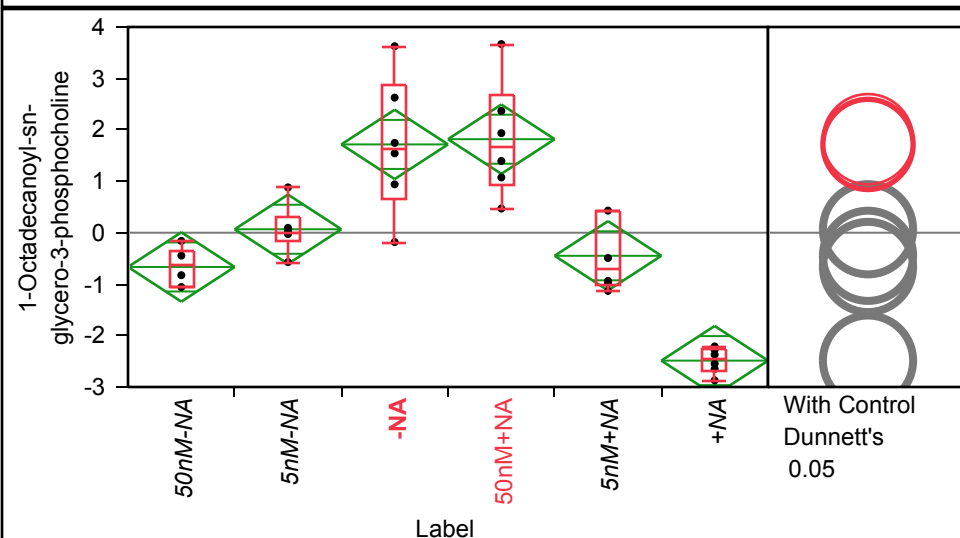

#### Quantiles

| Level   | Minimum  | 10%      | 25%      | Median   | 75%      | 90%      | Maximum  |
|---------|----------|----------|----------|----------|----------|----------|----------|
| 50nM-NA | -1.06315 | -1.06315 | -1.05826 | -0.63592 | -0.37387 | -0.15971 | -0.15971 |
| 5nM-NA  | -0.57199 | -0.57199 | -0.16313 | 0.012927 | 0.291024 | 0.881329 | 0.881329 |
| -NA     | -0.18168 | -0.18168 | 0.660042 | 1.644728 | 2.876532 | 3.626184 | 3.626184 |
| 50nM+NA | 0.469931 | 0.469931 | 0.923482 | 1.665239 | 2.692588 | 3.667638 | 3.667638 |
| 5nM+NA  | -1.13118 | -1.13118 | -1.02127 | -0.71502 | 0.424549 | 0.429226 | 0.429226 |
| +NA     | -2.87058 | -2.87058 | -2.70384 | -2.45888 | -2.2593  | -2.21232 | -2.21232 |

#### Oneway Anova

##### Summary of Fit

|                            |          |
|----------------------------|----------|
| Rsquare                    | 0.800224 |
| Adj Rsquare                | 0.766928 |
| Root Mean Square Error     | 0.808464 |
| Mean of Response           | 2.78e-11 |
| Observations (or Sum Wgts) | 36       |

##### Analysis of Variance

| Source   | DF | Sum of Squares | Mean Square | F Ratio | Prob > F |
|----------|----|----------------|-------------|---------|----------|
| Label    | 5  | 78.543698      | 15.7087     | 24.0337 | <.0001 * |
| Error    | 30 | 19.608424      | 0.6536      |         |          |
| C. Total | 35 | 98.152123      |             |         |          |

##### Means for Oneway Anova

| Level   | Number | Mean    | Std Error | Lower 95% | Upper 95% |
|---------|--------|---------|-----------|-----------|-----------|
| 50nM-NA | 6      | -0.6661 | 0.33005   | -1.340    | 0.00796   |
| 5nM-NA  | 6      | 0.0671  | 0.33005   | -0.607    | 0.741     |
| -NA     | 6      | 1.7169  | 0.33005   | 1.043     | 2.391     |
| 50nM+NA | 6      | 1.8184  | 0.33005   | 1.144     | 2.492     |
| 5nM+NA  | 6      | -0.4489 | 0.33005   | -1.123    | 0.225     |
| +NA     | 6      | -2.4873 | 0.33005   | -3.161    | -1.813    |

Std Error uses a pooled estimate of error variance

#### Means Comparisons

##### Comparisons with a control using Dunnett's Method

### Oneway Analysis of 1-oleoyl-2-hydroxy-sn-glycero-3-phosphocholine By Label

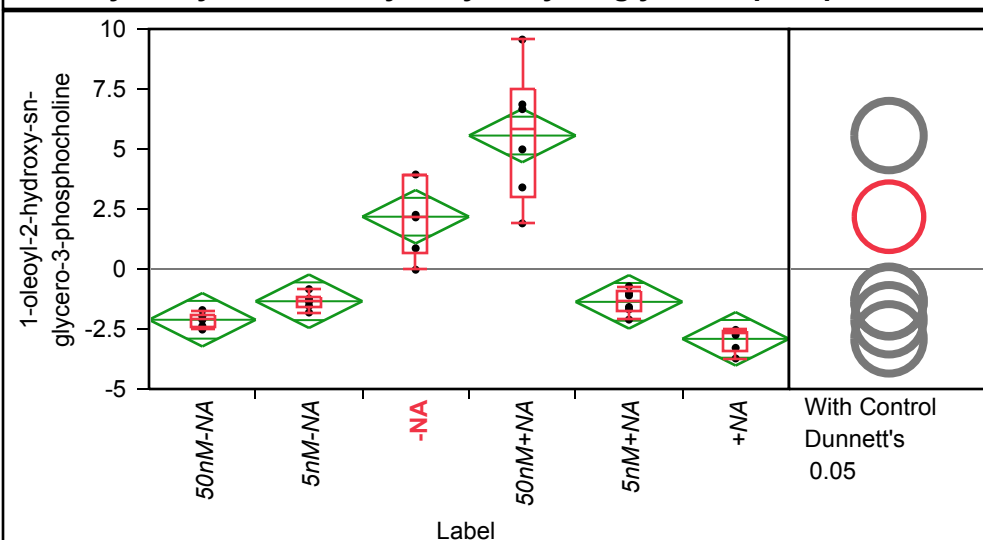

#### Quantiles

| Level   | Minimum  | 10%      | 25%      | Median   | 75%      | 90%      | Maximum  |
|---------|----------|----------|----------|----------|----------|----------|----------|
| 50nM-NA | -2.52389 | -2.52389 | -2.41175 | -2.05805 | -1.89999 | -1.71279 | -1.71279 |
| 5nM-NA  | -1.81414 | -1.81414 | -1.606   | -1.31592 | -1.13889 | -0.84171 | -0.84171 |
| -NA     | -0.03    | -0.03    | 0.640034 | 2.2034   | 3.905622 | 3.935722 | 3.935722 |
| 50nM+NA | 1.901309 | 1.901309 | 3.024569 | 5.821837 | 7.531543 | 9.558603 | 9.558603 |
| 5nM+NA  | -2.10916 | -2.10916 | -1.78924 | -1.34247 | -0.94148 | -0.72344 | -0.72344 |
| +NA     | -3.72739 | -3.72739 | -3.39634 | -2.67736 | -2.55269 | -2.5382  | -2.5382  |

#### Oneway Anova

##### Summary of Fit

|                            |          |
|----------------------------|----------|
| Rsquare                    | 0.854594 |
| Adj Rsquare                | 0.830359 |
| Root Mean Square Error     | 1.33383  |
| Mean of Response           | -2.8e-10 |
| Observations (or Sum Wgts) | 36       |

##### Analysis of Variance

| Source   | DF | Sum of Squares | Mean Square | F Ratio | Prob > F |
|----------|----|----------------|-------------|---------|----------|
| Label    | 5  | 313.68889      | 62.7378     | 35.2637 | <.0001 * |
| Error    | 30 | 53.37309       | 1.7791      |         |          |
| C. Total | 35 | 367.06198      |             |         |          |

##### Means for Oneway Anova

| Level   | Number | Mean    | Std Error | Lower 95% | Upper 95% |
|---------|--------|---------|-----------|-----------|-----------|
| 50nM-NA | 6      | -2.1149 | 0.54453   | -3.227    | -1.003    |
| 5nM-NA  | 6      | -1.3437 | 0.54453   | -2.456    | -0.232    |
| -NA     | 6      | 2.1786  | 0.54453   | 1.066     | 3.291     |
| 50nM+NA | 6      | 5.5597  | 0.54453   | 4.448     | 6.672     |
| 5nM+NA  | 6      | -1.3691 | 0.54453   | -2.481    | -0.257    |
| +NA     | 6      | -2.9106 | 0.54453   | -4.023    | -1.799    |

Std Error uses a pooled estimate of error variance

#### Means Comparisons

##### Comparisons with a control using Dunnett's Method

### Oneway Analysis of 2-Aminooctanoic acid By Label

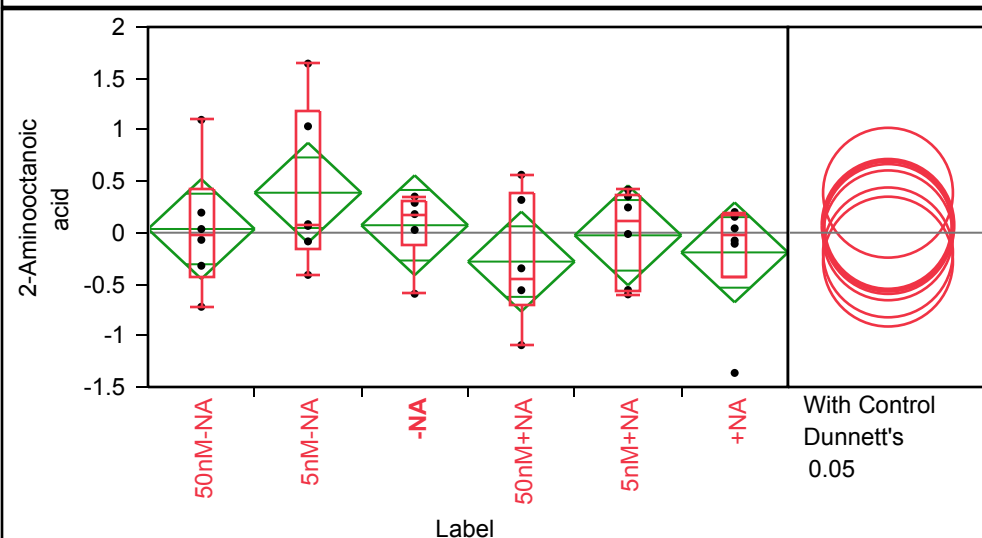

### Quantiles

| Level   | Minimum  | 10%      | 25%      | Median   | 75%      | 90%      | Maximum  |
|---------|----------|----------|----------|----------|----------|----------|----------|
| 50nM-NA | -0.72035 | -0.72035 | -0.42104 | -0.01676 | 0.42079  | 1.097218 | 1.097218 |
| 5nM-NA  | -0.41027 | -0.41027 | -0.16585 | 0.074338 | 1.186919 | 1.644153 | 1.644153 |
| -NA     | -0.59373 | -0.59373 | -0.12804 | 0.180462 | 0.305854 | 0.351042 | 0.351042 |
| 50nM+NA | -1.09324 | -1.09324 | -0.69947 | -0.45267 | 0.380068 | 0.563062 | 0.563062 |
| 5nM+NA  | -0.59948 | -0.59948 | -0.56775 | 0.116462 | 0.369275 | 0.417888 | 0.417888 |
| +NA     | -1.36315 | -1.36315 | -0.42143 | -0.01674 | 0.166099 | 0.200741 | 0.200741 |

### Oneway Anova

#### Summary of Fit

|                            |          |
|----------------------------|----------|
| Rsquare                    | 0.139307 |
| Adj Rsquare                | -0.00414 |
| Root Mean Square Error     | 0.581765 |
| Mean of Response           | -2.8e-10 |
| Observations (or Sum Wgts) | 36       |

#### Analysis of Variance

| Source   | DF | Sum of Squares | Mean Square | F Ratio | Prob > F |
|----------|----|----------------|-------------|---------|----------|
| Label    | 5  | 1.643398       | 0.328680    | 0.9711  | 0.4512   |
| Error    | 30 | 10.153532      | 0.338451    |         |          |
| C. Total | 35 | 11.796930      |             |         |          |

#### Means for Oneway Anova

| Level   | Number | Mean     | Std Error | Lower 95% | Upper 95% |
|---------|--------|----------|-----------|-----------|-----------|
| 50nM-NA | 6      | 0.03623  | 0.23750   | -0.4488   | 0.52128   |
| 5nM-NA  | 6      | 0.38878  | 0.23750   | -0.0963   | 0.87383   |
| -NA     | 6      | 0.07270  | 0.23750   | -0.4123   | 0.55775   |
| 50nM+NA | 6      | -0.28078 | 0.23750   | -0.7658   | 0.20427   |
| 5nM+NA  | 6      | -0.02546 | 0.23750   | -0.5105   | 0.45959   |
| +NA     | 6      | -0.19148 | 0.23750   | -0.6765   | 0.29357   |

Std Error uses a pooled estimate of error variance

### Means Comparisons

#### Comparisons with a control using Dunnett's Method

### Oneway Analysis of 2-dehydro-D-gluconate By Label

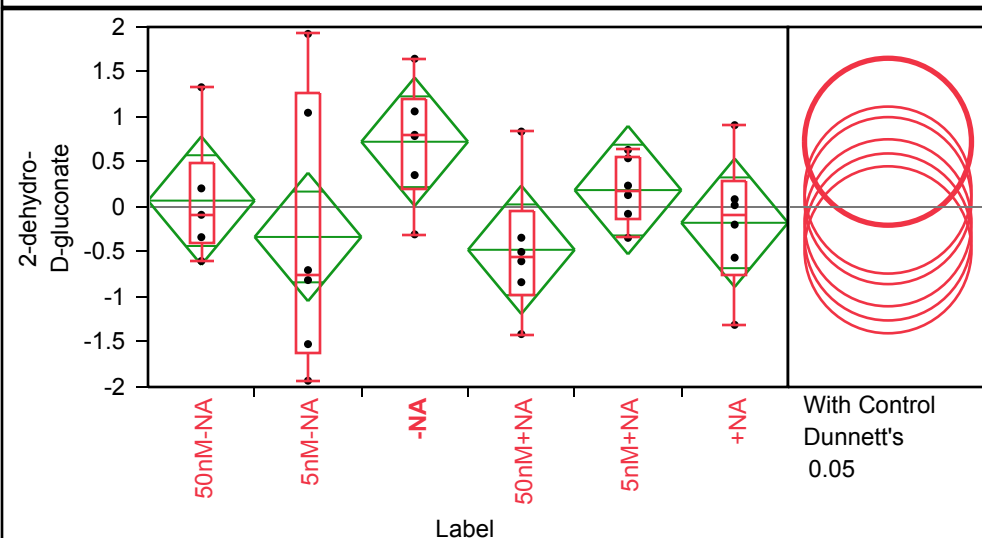

### Quantiles

| Level   | Minimum  | 10%      | 25%      | Median   | 75%      | 90%      | Maximum  |
|---------|----------|----------|----------|----------|----------|----------|----------|
| 50nM-NA | -0.60077 | -0.60077 | -0.4017  | -0.08783 | 0.487689 | 1.330371 | 1.330371 |
| 5nM-NA  | -1.93006 | -1.93006 | -1.62533 | -0.75673 | 1.266272 | 1.923214 | 1.923214 |
| -NA     | -0.30407 | -0.30407 | 0.190013 | 0.7949   | 1.208738 | 1.647399 | 1.647399 |
| 50nM+NA | -1.41223 | -1.41223 | -0.97975 | -0.55108 | -0.04651 | 0.838023 | 0.838023 |
| 5nM+NA  | -0.34271 | -0.34271 | -0.14296 | 0.185077 | 0.564855 | 0.634486 | 0.634486 |
| +NA     | -1.30966 | -1.30966 | -0.74966 | -0.08793 | 0.2922   | 0.909109 | 0.909109 |

### Oneway Anova

#### Summary of Fit

|                            |          |
|----------------------------|----------|
| Rsquare                    | 0.203406 |
| Adj Rsquare                | 0.07064  |
| Root Mean Square Error     | 0.855186 |
| Mean of Response           | -2.5e-17 |
| Observations (or Sum Wgts) | 36       |

#### Analysis of Variance

| Source   | DF | Sum of Squares | Mean Square | F Ratio | Prob > F |
|----------|----|----------------|-------------|---------|----------|
| Label    | 5  | 5.602339       | 1.12047     | 1.5321  | 0.2097   |
| Error    | 30 | 21.940303      | 0.73134     |         |          |
| C. Total | 35 | 27.542642      |             |         |          |

#### Means for Oneway Anova

| Level   | Number | Mean     | Std Error | Lower 95% | Upper 95% |
|---------|--------|----------|-----------|-----------|-----------|
| 50nM-NA | 6      | 0.07090  | 0.34913   | -0.642    | 0.7839    |
| 5nM-NA  | 6      | -0.33280 | 0.34913   | -1.046    | 0.3802    |
| -NA     | 6      | 0.72506  | 0.34913   | 0.012     | 1.4381    |
| 50nM+NA | 6      | -0.47555 | 0.34913   | -1.189    | 0.2375    |
| 5nM+NA  | 6      | 0.18787  | 0.34913   | -0.525    | 0.9009    |
| +NA     | 6      | -0.17548 | 0.34913   | -0.888    | 0.5375    |

Std Error uses a pooled estimate of error variance

### Means Comparisons

#### Comparisons with a control using Dunnett's Method

### Oneway Analysis of 2-deoxyglucose-6-phosphate By Label

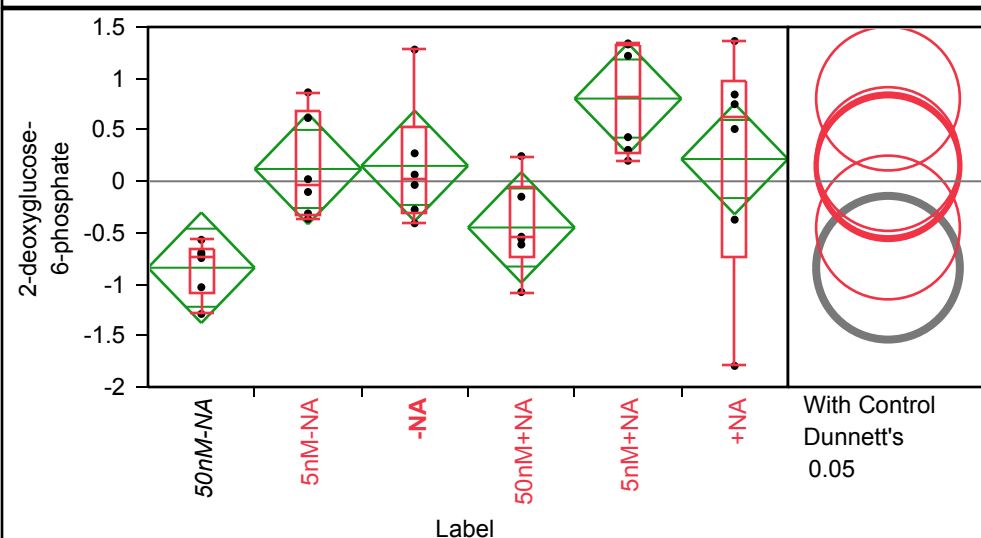

### Quantiles

| Level   | Minimum  | 10%      | 25%      | Median   | 75%      | 90%      | Maximum  |
|---------|----------|----------|----------|----------|----------|----------|----------|
| 50nM-NA | -1.28966 | -1.28966 | -1.09506 | -0.72976 | -0.66296 | -0.56902 | -0.56902 |
| 5nM-NA  | -0.3649  | -0.3649  | -0.32577 | -0.04189 | 0.677897 | 0.864631 | 0.864631 |
| -NA     | -0.40841 | -0.40841 | -0.30822 | 0.01459  | 0.524095 | 1.280223 | 1.280223 |
| 50nM+NA | -1.07641 | -1.07641 | -0.73058 | -0.54921 | -0.05153 | 0.244543 | 0.244543 |
| 5nM+NA  | 0.199542 | 0.199542 | 0.278759 | 0.824308 | 1.333065 | 1.340506 | 1.340506 |
| +NA     | -1.79493 | -1.79493 | -0.72863 | 0.628978 | 0.973617 | 1.363469 | 1.363469 |

### Oneway Anova

#### Summary of Fit

|                            |          |
|----------------------------|----------|
| Rsquare                    | 0.441323 |
| Adj Rsquare                | 0.34821  |
| Root Mean Square Error     | 0.644029 |
| Mean of Response           | 2.78e-10 |
| Observations (or Sum Wgts) | 36       |

#### Analysis of Variance

| Source   | DF | Sum of Squares | Mean Square | F Ratio | Prob > F |
|----------|----|----------------|-------------|---------|----------|
| Label    | 5  | 9.829424       | 1.96588     | 4.7397  | 0.0026 * |
| Error    | 30 | 12.443209      | 0.41477     |         |          |
| C. Total | 35 | 22.272633      |             |         |          |

#### Means for Oneway Anova

| Level   | Number | Mean     | Std Error | Lower 95% | Upper 95% |
|---------|--------|----------|-----------|-----------|-----------|
| 50nM-NA | 6      | -0.84044 | 0.26292   | -1.377    | -0.303    |
| 5nM-NA  | 6      | 0.11981  | 0.26292   | -0.417    | 0.657     |
| -NA     | 6      | 0.14970  | 0.26292   | -0.387    | 0.687     |
| 50nM+NA | 6      | -0.44930 | 0.26292   | -0.986    | 0.088     |
| 5nM+NA  | 6      | 0.80407  | 0.26292   | 0.267     | 1.341     |
| +NA     | 6      | 0.21616  | 0.26292   | -0.321    | 0.753     |

Std Error uses a pooled estimate of error variance

### Means Comparisons

#### Comparisons with a control using Dunnett's Method

### Oneway Analysis of 2-Hydroxy-2-methylbutanedioic acid By Label

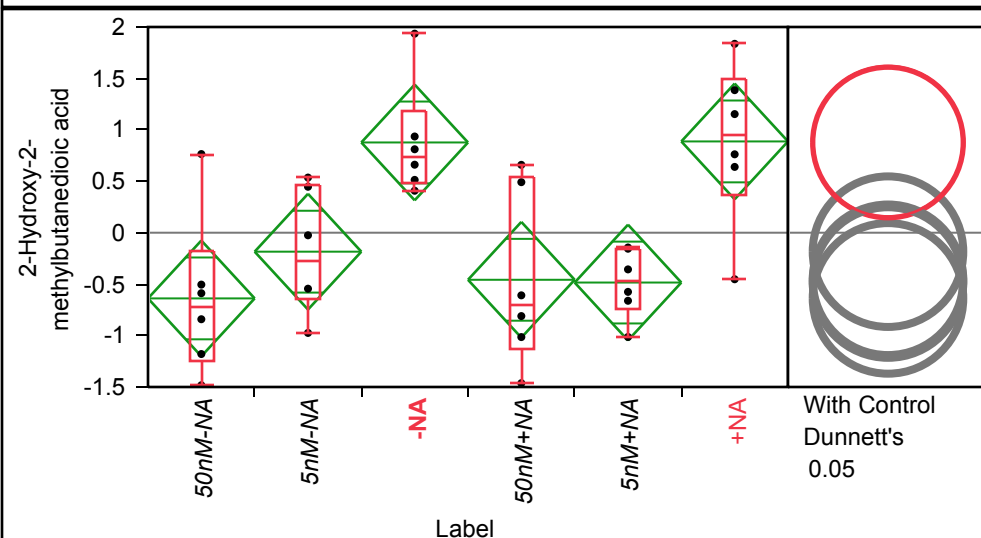

### Quantiles

| Level   | Minimum  | 10%      | 25%      | Median   | 75%      | 90%      | Maximum  |
|---------|----------|----------|----------|----------|----------|----------|----------|
| 50nM-NA | -1.48285 | -1.48285 | -1.25534 | -0.71477 | -0.18727 | 0.764637 | 0.764637 |
| 5nM-NA  | -0.97433 | -0.97433 | -0.65242 | -0.28465 | 0.469082 | 0.536051 | 0.536051 |
| -NA     | 0.408084 | 0.408084 | 0.487222 | 0.736287 | 1.185382 | 1.935237 | 1.935237 |
| 50nM+NA | -1.46276 | -1.46276 | -1.12674 | -0.70973 | 0.533529 | 0.659715 | 0.659715 |
| 5nM+NA  | -1.01364 | -1.01364 | -0.74963 | -0.46587 | -0.15264 | -0.14367 | -0.14367 |
| +NA     | -0.45251 | -0.45251 | 0.366659 | 0.957737 | 1.498541 | 1.836291 | 1.836291 |

### Oneway Anova

#### Summary of Fit

|                            |          |
|----------------------------|----------|
| Rsquare                    | 0.517708 |
| Adj Rsquare                | 0.437326 |
| Root Mean Square Error     | 0.674737 |
| Mean of Response           | -1.11e-9 |
| Observations (or Sum Wgts) | 36       |

#### Analysis of Variance

| Source   | DF | Sum of Squares | Mean Square | F Ratio | Prob > F |
|----------|----|----------------|-------------|---------|----------|
| Label    | 5  | 14.661036      | 2.93221     | 6.4406  | 0.0004 * |
| Error    | 30 | 13.658088      | 0.45527     |         |          |
| C. Total | 35 | 28.319124      |             |         |          |

#### Means for Oneway Anova

| Level   | Number | Mean     | Std Error | Lower 95% | Upper 95% |
|---------|--------|----------|-----------|-----------|-----------|
| 50nM-NA | 6      | -0.63864 | 0.27546   | -1.201    | -0.076    |
| 5nM-NA  | 6      | -0.18432 | 0.27546   | -0.747    | 0.378     |
| -NA     | 6      | 0.87749  | 0.27546   | 0.315     | 1.440     |
| 50nM+NA | 6      | -0.45763 | 0.27546   | -1.020    | 0.105     |
| 5nM+NA  | 6      | -0.48439 | 0.27546   | -1.047    | 0.078     |
| +NA     | 6      | 0.88749  | 0.27546   | 0.325     | 1.450     |

Std Error uses a pooled estimate of error variance

### Means Comparisons

#### Comparisons with a control using Dunnett's Method

### Oneway Analysis of 2-hydroxyglutarate By Label

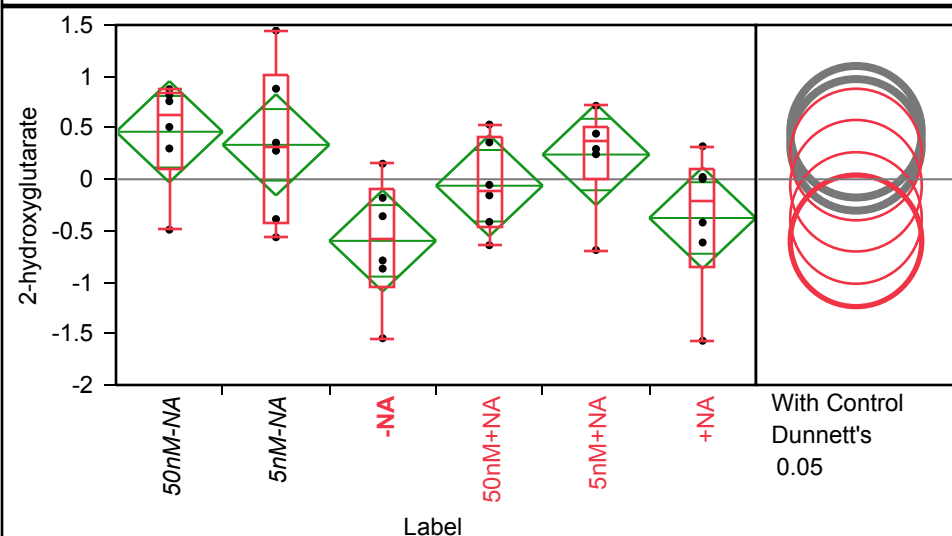

### Quantiles

| Level   | Minimum  | 10%      | 25%      | Median   | 75%      | 90%      | Maximum  |
|---------|----------|----------|----------|----------|----------|----------|----------|
| 50nM-NA | -0.49002 | -0.49002 | 0.101943 | 0.633754 | 0.834007 | 0.876246 | 0.876246 |
| 5nM-NA  | -0.5636  | -0.5636  | -0.43103 | 0.316745 | 1.021839 | 1.445551 | 1.445551 |
| -NA     | -1.54564 | -1.54564 | -1.03794 | -0.57408 | -0.09736 | 0.150921 | 0.150921 |
| 50nM+NA | -0.64098 | -0.64098 | -0.47111 | -0.10527 | 0.401857 | 0.531968 | 0.531968 |
| 5nM+NA  | -0.68772 | -0.68772 | 0.01054  | 0.364878 | 0.511249 | 0.7145   | 0.7145   |
| +NA     | -1.5698  | -1.5698  | -0.85327 | -0.20837 | 0.096677 | 0.320781 | 0.320781 |

### Oneway Anova

#### Summary of Fit

|                            |          |
|----------------------------|----------|
| Rsquare                    | 0.338092 |
| Adj Rsquare                | 0.227774 |
| Root Mean Square Error     | 0.589496 |
| Mean of Response           | 0        |
| Observations (or Sum Wgts) | 36       |

#### Analysis of Variance

| Source   | DF | Sum of Squares | Mean Square | F Ratio | Prob > F |
|----------|----|----------------|-------------|---------|----------|
| Label    | 5  | 5.325017       | 1.06500     | 3.0647  | 0.0237 * |
| Error    | 30 | 10.425175      | 0.34751     |         |          |
| C. Total | 35 | 15.750193      |             |         |          |

#### Means for Oneway Anova

| Level   | Number | Mean     | Std Error | Lower 95% | Upper 95% |
|---------|--------|----------|-----------|-----------|-----------|
| 50nM-NA | 6      | 0.46215  | 0.24066   | -0.029    | 0.9536    |
| 5nM-NA  | 6      | 0.33487  | 0.24066   | -0.157    | 0.8264    |
| -NA     | 6      | -0.59862 | 0.24066   | -1.090    | -0.1071   |
| 50nM+NA | 6      | -0.06259 | 0.24066   | -0.554    | 0.4289    |
| 5nM+NA  | 6      | 0.24055  | 0.24066   | -0.251    | 0.7320    |
| +NA     | 6      | -0.37637 | 0.24066   | -0.868    | 0.1151    |

Std Error uses a pooled estimate of error variance

### Means Comparisons

#### Comparisons with a control using Dunnett's Method

### Oneway Analysis of 2-Isopropylmalic acid By Label

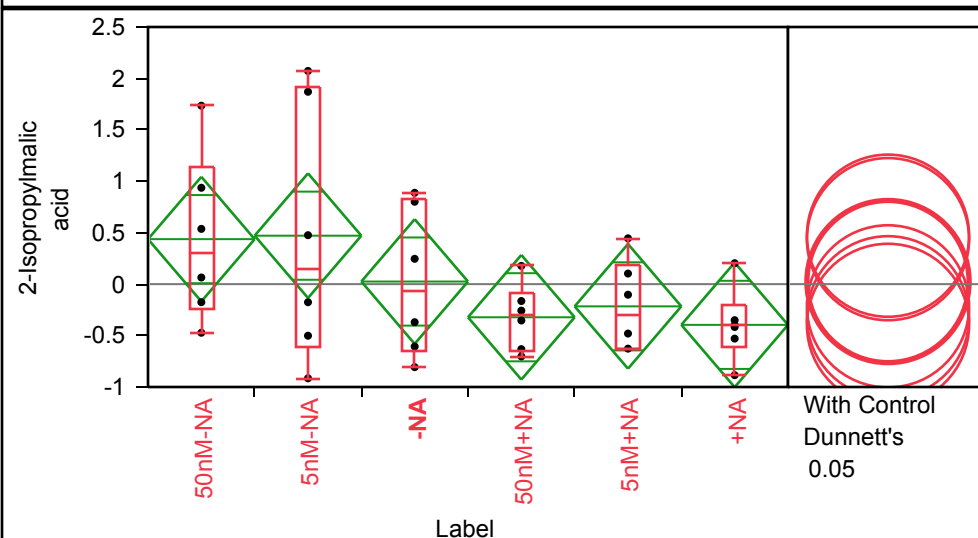

### Quantiles

| Level   | Minimum  | 10%      | 25%      | Median   | 75%      | 90%      | Maximum  |
|---------|----------|----------|----------|----------|----------|----------|----------|
| 50nM-NA | -0.47261 | -0.47261 | -0.2498  | 0.300859 | 1.136352 | 1.734583 | 1.734583 |
| 5nM-NA  | -0.91544 | -0.91544 | -0.60498 | 0.150109 | 1.920846 | 2.072873 | 2.072873 |
| -NA     | -0.80713 | -0.80713 | -0.65666 | -0.06184 | 0.822969 | 0.888124 | 0.888124 |
| 50nM+NA | -0.70253 | -0.70253 | -0.64955 | -0.30547 | -0.07886 | 0.177279 | 0.177279 |
| 5nM+NA  | -0.6338  | -0.6338  | -0.62873 | -0.29164 | 0.188647 | 0.445353 | 0.445353 |
| +NA     | -0.88503 | -0.88503 | -0.61844 | -0.40681 | -0.21206 | 0.203249 | 0.203249 |

### Oneway Anova

#### Summary of Fit

|                            |          |
|----------------------------|----------|
| Rsquare                    | 0.214504 |
| Adj Rsquare                | 0.083588 |
| Root Mean Square Error     | 0.726699 |
| Mean of Response           | -2.8e-10 |
| Observations (or Sum Wgts) | 36       |

#### Analysis of Variance

| Source   | DF | Sum of Squares | Mean Square | F Ratio | Prob > F |
|----------|----|----------------|-------------|---------|----------|
| Label    | 5  | 4.326360       | 0.865272    | 1.6385  | 0.1802   |
| Error    | 30 | 15.842754      | 0.528092    |         |          |
| C. Total | 35 | 20.169114      |             |         |          |

#### Means for Oneway Anova

| Level   | Number | Mean     | Std Error | Lower 95% | Upper 95% |
|---------|--------|----------|-----------|-----------|-----------|
| 50nM-NA | 6      | 0.43752  | 0.29667   | -0.168    | 1.0434    |
| 5nM-NA  | 6      | 0.47106  | 0.29667   | -0.135    | 1.0769    |
| -NA     | 6      | 0.02534  | 0.29667   | -0.581    | 0.6312    |
| 50nM+NA | 6      | -0.32206 | 0.29667   | -0.928    | 0.2838    |
| 5nM+NA  | 6      | -0.21595 | 0.29667   | -0.822    | 0.3899    |
| +NA     | 6      | -0.39591 | 0.29667   | -1.002    | 0.2100    |

Std Error uses a pooled estimate of error variance

### Means Comparisons

#### Comparisons with a control using Dunnett's Method

### Oneway Analysis of 2-ketoglutarate By Label

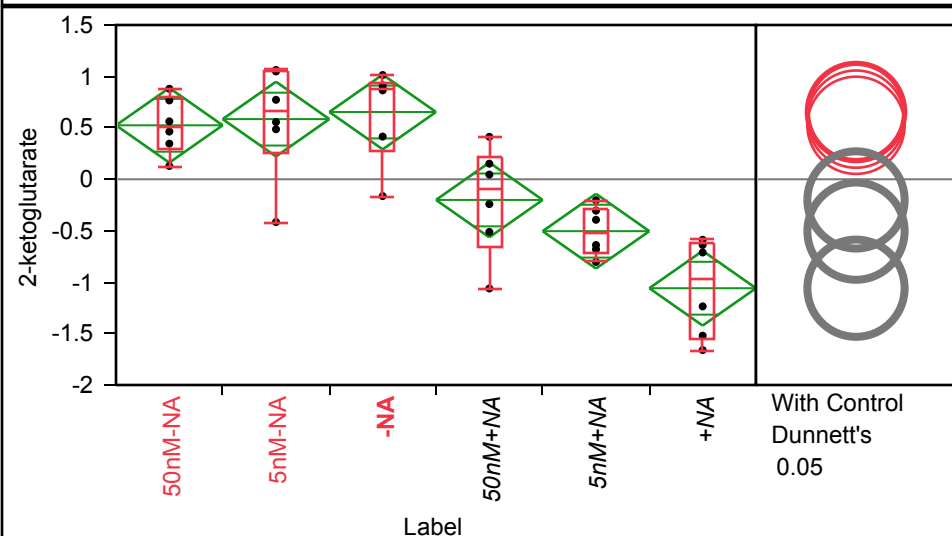

### Quantiles

| Level   | Minimum  | 10%      | 25%      | Median   | 75%      | 90%      | Maximum  |
|---------|----------|----------|----------|----------|----------|----------|----------|
| 50nM-NA | 0.128982 | 0.128982 | 0.292164 | 0.513335 | 0.795199 | 0.879979 | 0.879979 |
| 5nM-NA  | -0.41587 | -0.41587 | 0.260855 | 0.664277 | 1.051997 | 1.062897 | 1.062897 |
| -NA     | -0.16343 | -0.16343 | 0.270493 | 0.873766 | 0.937905 | 1.013418 | 1.013418 |
| 50nM+NA | -1.06157 | -1.06157 | -0.64938 | -0.09769 | 0.21705  | 0.412934 | 0.412934 |
| 5nM+NA  | -0.80339 | -0.80339 | -0.71149 | -0.51648 | -0.27969 | -0.20427 | -0.20427 |
| +NA     | -1.66045 | -1.66045 | -1.55535 | -0.97373 | -0.6256  | -0.58801 | -0.58801 |

### Oneway Anova

#### Summary of Fit

|                            |          |
|----------------------------|----------|
| Rsquare                    | 0.72177  |
| Adj Rsquare                | 0.675399 |
| Root Mean Square Error     | 0.435681 |
| Mean of Response           | 5.56e-10 |
| Observations (or Sum Wgts) | 36       |

#### Analysis of Variance

| Source   | DF | Sum of Squares | Mean Square | F Ratio | Prob > F |
|----------|----|----------------|-------------|---------|----------|
| Label    | 5  | 14.772491      | 2.95450     | 15.5649 | <.0001 * |
| Error    | 30 | 5.694533       | 0.18982     |         |          |
| C. Total | 35 | 20.467024      |             |         |          |

#### Means for Oneway Anova

| Level   | Number | Mean    | Std Error | Lower 95% | Upper 95% |
|---------|--------|---------|-----------|-----------|-----------|
| 50nM-NA | 6      | 0.5249  | 0.17787   | 0.162     | 0.888     |
| 5nM-NA  | 6      | 0.5851  | 0.17787   | 0.222     | 0.948     |
| -NA     | 6      | 0.6542  | 0.17787   | 0.291     | 1.017     |
| 50nM+NA | 6      | -0.2007 | 0.17787   | -0.564    | 0.163     |
| 5nM+NA  | 6      | -0.5044 | 0.17787   | -0.868    | -0.141    |
| +NA     | 6      | -1.0591 | 0.17787   | -1.422    | -0.696    |

Std Error uses a pooled estimate of error variance

### Means Comparisons

#### Comparisons with a control using Dunnett's Method

### Oneway Analysis of 2-Oxo-4-hydroxy-5-aminovalerate By Label

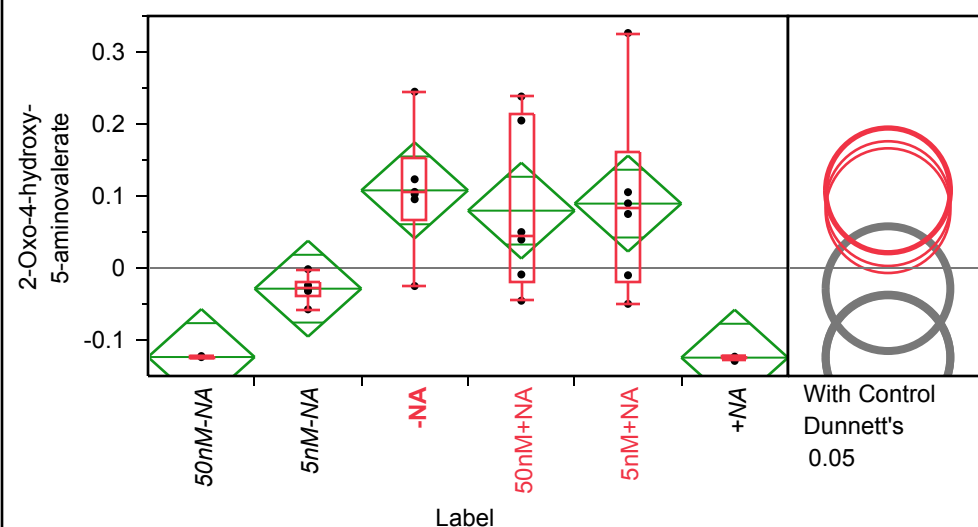

#### Quantiles

| Level   | Minimum  | 10%      | 25%      | Median   | 75%      | 90%      | Maximum  |
|---------|----------|----------|----------|----------|----------|----------|----------|
| 50nM-NA | -0.12441 | -0.12441 | -0.12416 | -0.12388 | -0.12307 | -0.12235 | -0.12235 |
| 5nM-NA  | -0.05741 | -0.05741 | -0.03838 | -0.02859 | -0.01842 | -0.00168 | -0.00168 |
| -NA     | -0.02507 | -0.02507 | 0.065361 | 0.104178 | 0.153622 | 0.244839 | 0.244839 |
| 50nM+NA | -0.04546 | -0.04546 | -0.01812 | 0.044654 | 0.213157 | 0.238159 | 0.238159 |
| 5nM+NA  | -0.04981 | -0.04981 | -0.02001 | 0.082395 | 0.16057  | 0.326361 | 0.326361 |
| +NA     | -0.129   | -0.129   | -0.12585 | -0.12337 | -0.12324 | -0.12319 | -0.12319 |

#### Oneway Anova

##### Summary of Fit

|                            |          |
|----------------------------|----------|
| Rsquare                    | 0.643757 |
| Adj Rsquare                | 0.584383 |
| Root Mean Square Error     | 0.079827 |
| Mean of Response           | 3.08e-18 |
| Observations (or Sum Wgts) | 36       |

##### Analysis of Variance

| Source   | DF | Sum of Squares | Mean Square | F Ratio | Prob > F |
|----------|----|----------------|-------------|---------|----------|
| Label    | 5  | 0.34545608     | 0.069091    | 10.8424 | <.0001 * |
| Error    | 30 | 0.19116869     | 0.006372    |         |          |
| C. Total | 35 | 0.53662477     |             |         |          |

##### Means for Oneway Anova

| Level   | Number | Mean     | Std Error | Lower 95% | Upper 95% |
|---------|--------|----------|-----------|-----------|-----------|
| 50nM-NA | 6      | -0.12365 | 0.03259   | -0.1902   | -0.0571   |
| 5nM-NA  | 6      | -0.02872 | 0.03259   | -0.0953   | 0.0378    |
| -NA     | 6      | 0.10781  | 0.03259   | 0.0413    | 0.1744    |
| 50nM+NA | 6      | 0.07964  | 0.03259   | 0.0131    | 0.1462    |
| 5nM+NA  | 6      | 0.08943  | 0.03259   | 0.0229    | 0.1560    |
| +NA     | 6      | -0.12450 | 0.03259   | -0.1911   | -0.0579   |

Std Error uses a pooled estimate of error variance

#### Means Comparisons

##### Comparisons with a control using Dunnett's Method

### Oneway Analysis of 2-oxobutanoate By Label

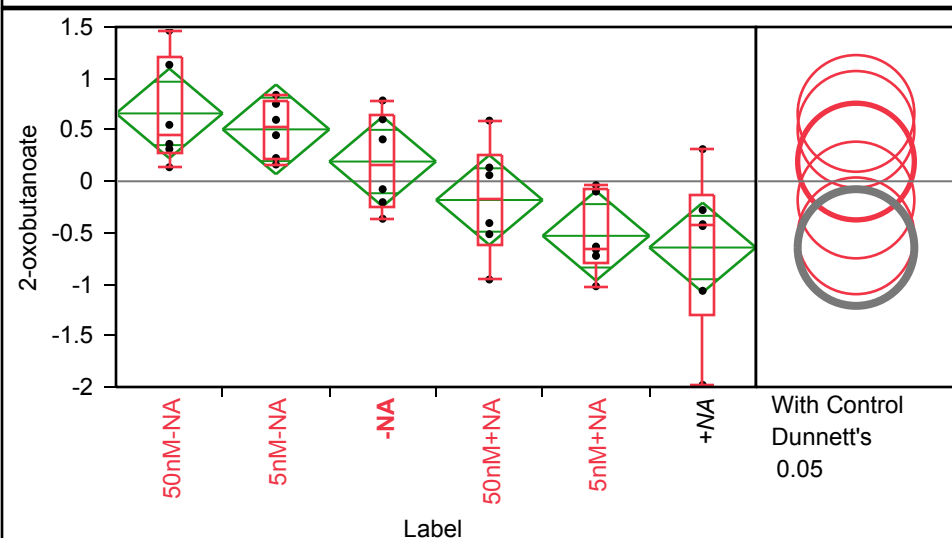

### Quantiles

| Level   | Minimum  | 10%      | 25%      | Median   | 75%      | 90%      | Maximum  |
|---------|----------|----------|----------|----------|----------|----------|----------|
| 50nM-NA | 0.136511 | 0.136511 | 0.269092 | 0.456175 | 1.21537  | 1.464117 | 1.464117 |
| 5nM-NA  | 0.162949 | 0.162949 | 0.210347 | 0.522992 | 0.774793 | 0.839897 | 0.839897 |
| -NA     | -0.36441 | -0.36441 | -0.24358 | 0.165318 | 0.648469 | 0.785597 | 0.785597 |
| 50nM+NA | -0.95511 | -0.95511 | -0.62434 | -0.17318 | 0.247768 | 0.589833 | 0.589833 |
| 5nM+NA  | -1.02042 | -1.02042 | -0.7986  | -0.6494  | -0.0842  | -0.03843 | -0.03843 |
| +NA     | -1.9795  | -1.9795  | -1.29347 | -0.42646 | -0.1316  | 0.312532 | 0.312532 |

### Oneway Anova

#### Summary of Fit

|                            |          |
|----------------------------|----------|
| Rsquare                    | 0.515823 |
| Adj Rsquare                | 0.435126 |
| Root Mean Square Error     | 0.52281  |
| Mean of Response           | -2.8e-10 |
| Observations (or Sum Wgts) | 36       |

#### Analysis of Variance

| Source   | DF | Sum of Squares | Mean Square | F Ratio | Prob > F |
|----------|----|----------------|-------------|---------|----------|
| Label    | 5  | 8.735857       | 1.74717     | 6.3922  | 0.0004 * |
| Error    | 30 | 8.199919       | 0.27333     |         |          |
| C. Total | 35 | 16.935776      |             |         |          |

#### Means for Oneway Anova

| Level   | Number | Mean     | Std Error | Lower 95% | Upper 95% |
|---------|--------|----------|-----------|-----------|-----------|
| 50nM-NA | 6      | 0.65979  | 0.21344   | 0.224     | 1.096     |
| 5nM-NA  | 6      | 0.50468  | 0.21344   | 0.069     | 0.941     |
| -NA     | 6      | 0.19188  | 0.21344   | -0.244    | 0.628     |
| 50nM+NA | 6      | -0.18199 | 0.21344   | -0.618    | 0.254     |
| 5nM+NA  | 6      | -0.53029 | 0.21344   | -0.966    | -0.094    |
| +NA     | 6      | -0.64406 | 0.21344   | -1.080    | -0.208    |

Std Error uses a pooled estimate of error variance

### Means Comparisons

#### Comparisons with a control using Dunnett's Method

### Oneway Analysis of 3-phosphoglycerate By Label

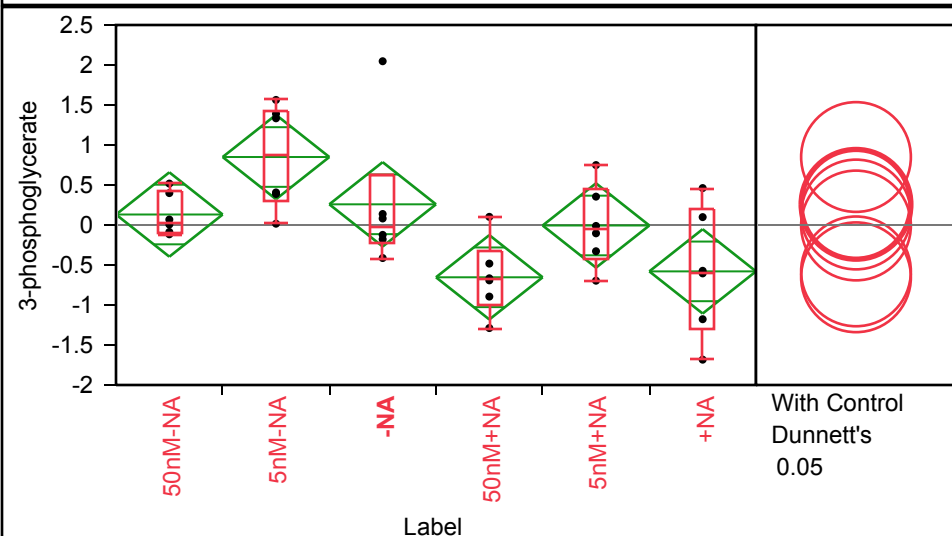

### Quantiles

| Level   | Minimum  | 10%      | 25%      | Median   | 75%      | 90%      | Maximum  |
|---------|----------|----------|----------|----------|----------|----------|----------|
| 50nM-NA | -0.11627 | -0.11627 | -0.09452 | 0.037201 | 0.428484 | 0.517465 | 0.517465 |
| 5nM-NA  | 0.016316 | 0.016316 | 0.294981 | 0.870428 | 1.433625 | 1.563337 | 1.563337 |
| -NA     | -0.413   | -0.413   | -0.23703 | -0.02107 | 0.614816 | 2.047001 | 2.047001 |
| 50nM+NA | -1.28828 | -1.28828 | -0.99321 | -0.67909 | -0.33635 | 0.101817 | 0.101817 |
| 5nM+NA  | -0.6961  | -0.6961  | -0.42013 | -0.05787 | 0.453087 | 0.748826 | 0.748826 |
| +NA     | -1.68329 | -1.68329 | -1.30401 | -0.58875 | 0.189314 | 0.461515 | 0.461515 |

### Oneway Anova

#### Summary of Fit

|                            |          |
|----------------------------|----------|
| Rsquare                    | 0.439828 |
| Adj Rsquare                | 0.346466 |
| Root Mean Square Error     | 0.632296 |
| Mean of Response           | 1.11e-10 |
| Observations (or Sum Wgts) | 36       |

#### Analysis of Variance

| Source   | DF | Sum of Squares | Mean Square | F Ratio | Prob > F |
|----------|----|----------------|-------------|---------|----------|
| Label    | 5  | 9.417239       | 1.88345     | 4.7110  | 0.0027 * |
| Error    | 30 | 11.993952      | 0.39980     |         |          |
| C. Total | 35 | 21.411191      |             |         |          |

#### Means for Oneway Anova

| Level   | Number | Mean     | Std Error | Lower 95% | Upper 95% |
|---------|--------|----------|-----------|-----------|-----------|
| 50nM-NA | 6      | 0.13119  | 0.25813   | -0.396    | 0.658     |
| 5nM-NA  | 6      | 0.84979  | 0.25813   | 0.323     | 1.377     |
| -NA     | 6      | 0.25849  | 0.25813   | -0.269    | 0.786     |
| 50nM+NA | 6      | -0.65365 | 0.25813   | -1.181    | -0.126    |
| 5nM+NA  | 6      | -0.00611 | 0.25813   | -0.533    | 0.521     |
| +NA     | 6      | -0.57971 | 0.25813   | -1.107    | -0.053    |

Std Error uses a pooled estimate of error variance

### Means Comparisons

#### Comparisons with a control using Dunnett's Method

### Oneway Analysis of 3-phospho-serine By Label

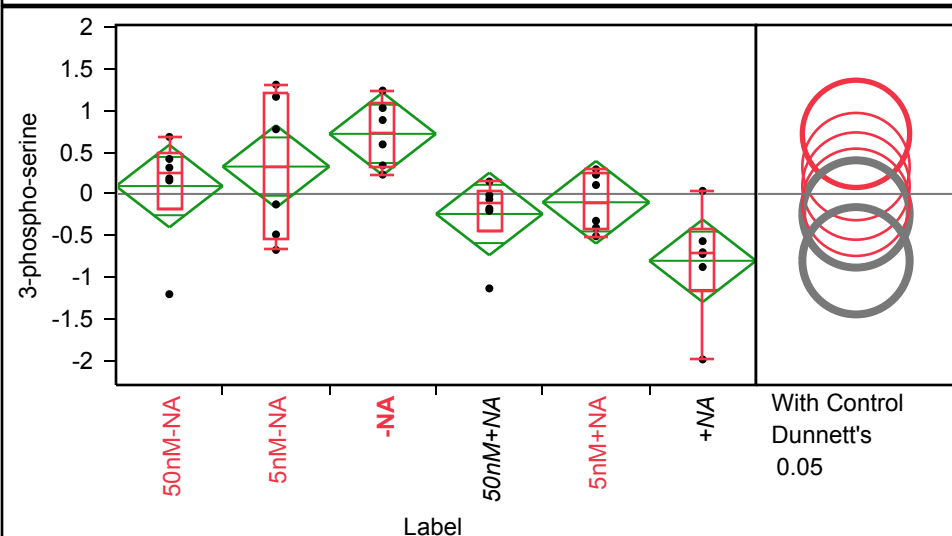

### Quantiles

| Level   | Minimum  | 10%      | 25%      | Median   | 75%      | 90%      | Maximum  |
|---------|----------|----------|----------|----------|----------|----------|----------|
| 50nM-NA | -1.20211 | -1.20211 | -0.1796  | 0.250815 | 0.485202 | 0.683513 | 0.683513 |
| 5nM-NA  | -0.67114 | -0.67114 | -0.53239 | 0.325432 | 1.200464 | 1.309678 | 1.309678 |
| -NA     | 0.231335 | 0.231335 | 0.314278 | 0.739725 | 1.08177  | 1.238625 | 1.238625 |
| 50nM+NA | -1.1329  | -1.1329  | -0.43459 | -0.12013 | 0.026349 | 0.148617 | 0.148617 |
| 5nM+NA  | -0.50715 | -0.50715 | -0.43019 | -0.10761 | 0.246504 | 0.294967 | 0.294967 |
| +NA     | -1.98417 | -1.98417 | -1.15304 | -0.70979 | -0.41538 | 0.036666 | 0.036666 |

### Oneway Anova

#### Summary of Fit

|                            |          |
|----------------------------|----------|
| Rsquare                    | 0.433551 |
| Adj Rsquare                | 0.339143 |
| Root Mean Square Error     | 0.592856 |
| Mean of Response           | -1.39e-9 |
| Observations (or Sum Wgts) | 36       |

#### Analysis of Variance

| Source   | DF | Sum of Squares | Mean Square | F Ratio | Prob > F |
|----------|----|----------------|-------------|---------|----------|
| Label    | 5  | 8.070477       | 1.61410     | 4.5923  | 0.0031 * |
| Error    | 30 | 10.544344      | 0.35148     |         |          |
| C. Total | 35 | 18.614822      |             |         |          |

#### Means for Oneway Anova

| Level   | Number | Mean     | Std Error | Lower 95% | Upper 95% |
|---------|--------|----------|-----------|-----------|-----------|
| 50nM-NA | 6      | 0.09390  | 0.24203   | -0.400    | 0.588     |
| 5nM-NA  | 6      | 0.32789  | 0.24203   | -0.166    | 0.822     |
| -NA     | 6      | 0.72014  | 0.24203   | 0.226     | 1.214     |
| 50nM+NA | 6      | -0.24013 | 0.24203   | -0.734    | 0.254     |
| 5nM+NA  | 6      | -0.10027 | 0.24203   | -0.595    | 0.394     |
| +NA     | 6      | -0.80152 | 0.24203   | -1.296    | -0.307    |

Std Error uses a pooled estimate of error variance

### Means Comparisons

#### Comparisons with a control using Dunnett's Method

### Oneway Analysis of 4-aminobutyrate By Label

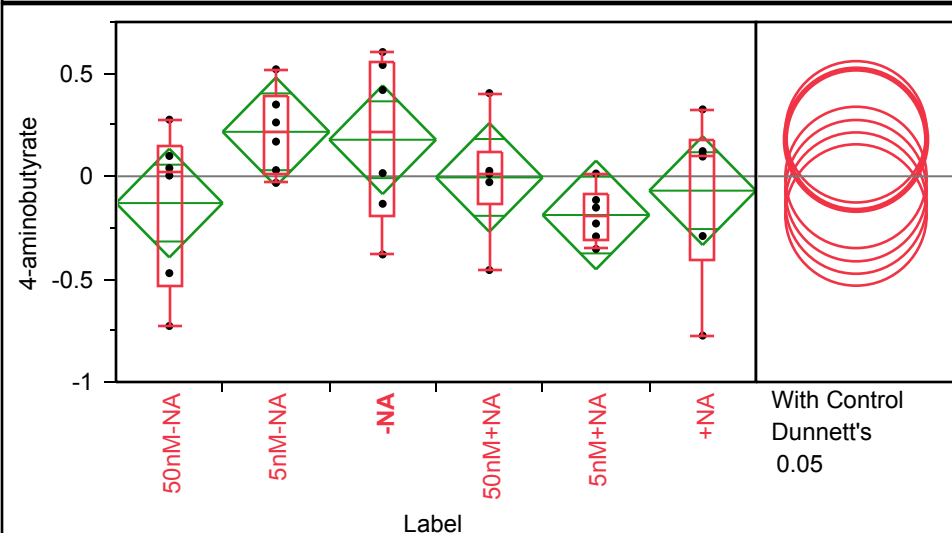

### Quantiles

| Level   | Minimum  | 10%      | 25%      | Median   | 75%      | 90%      | Maximum  |
|---------|----------|----------|----------|----------|----------|----------|----------|
| 50nM-NA | -0.72781 | -0.72781 | -0.53511 | 0.021487 | 0.142881 | 0.275201 | 0.275201 |
| 5nM-NA  | -0.03173 | -0.03173 | 0.014503 | 0.215073 | 0.391579 | 0.520172 | 0.520172 |
| -NA     | -0.38006 | -0.38006 | -0.19531 | 0.217374 | 0.556699 | 0.604051 | 0.604051 |
| 50nM+NA | -0.45593 | -0.45593 | -0.13537 | 0.010233 | 0.120878 | 0.404299 | 0.404299 |
| 5nM+NA  | -0.35344 | -0.35344 | -0.30746 | -0.19085 | -0.08297 | 0.01349  | 0.01349  |
| +NA     | -0.77441 | -0.77441 | -0.4114  | 0.099078 | 0.172963 | 0.325228 | 0.325228 |

### Oneway Anova

#### Summary of Fit

|                            |          |
|----------------------------|----------|
| Rsquare                    | 0.212844 |
| Adj Rsquare                | 0.081651 |
| Root Mean Square Error     | 0.316691 |
| Mean of Response           | -5.6e-11 |
| Observations (or Sum Wgts) | 36       |

#### Analysis of Variance

| Source   | DF | Sum of Squares | Mean Square | F Ratio | Prob > F |
|----------|----|----------------|-------------|---------|----------|
| Label    | 5  | 0.8135673      | 0.162713    | 1.6224  | 0.1844   |
| Error    | 30 | 3.0088008      | 0.100293    |         |          |
| C. Total | 35 | 3.8223681      |             |         |          |

#### Means for Oneway Anova

| Level   | Number | Mean     | Std Error | Lower 95% | Upper 95% |
|---------|--------|----------|-----------|-----------|-----------|
| 50nM-NA | 6      | -0.13029 | 0.12929   | -0.3943   | 0.13375   |
| 5nM-NA  | 6      | 0.21620  | 0.12929   | -0.0478   | 0.48025   |
| -NA     | 6      | 0.17766  | 0.12929   | -0.0864   | 0.44170   |
| 50nM+NA | 6      | -0.00555 | 0.12929   | -0.2696   | 0.25850   |
| 5nM+NA  | 6      | -0.18815 | 0.12929   | -0.4522   | 0.07589   |
| +NA     | 6      | -0.06987 | 0.12929   | -0.3339   | 0.19417   |

Std Error uses a pooled estimate of error variance

### Means Comparisons

#### Comparisons with a control using Dunnett's Method

### Oneway Analysis of 4-Pyridoxic acid By Label

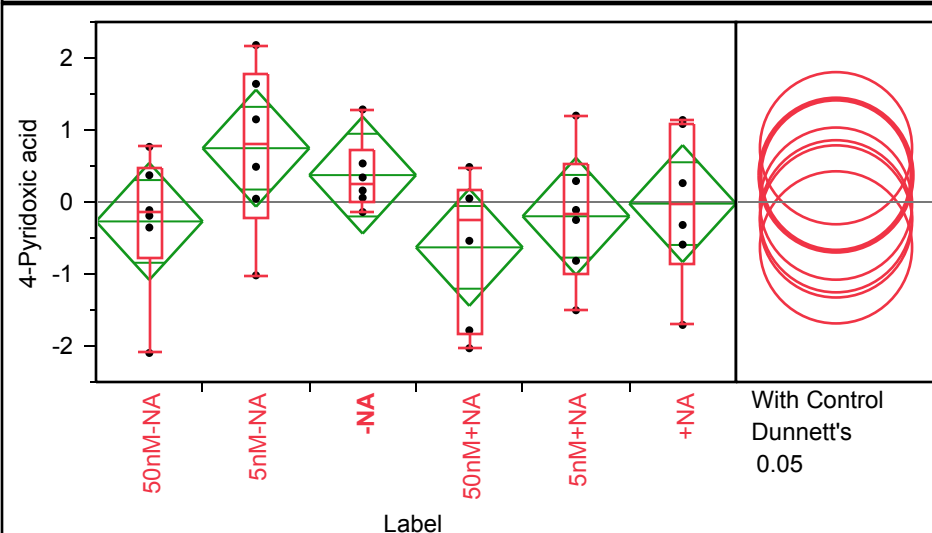

### Quantiles

| Level   | Minimum  | 10%      | 25%      | Median   | 75%      | 90%      | Maximum  |
|---------|----------|----------|----------|----------|----------|----------|----------|
| 50nM-NA | -2.09668 | -2.09668 | -0.78998 | -0.15234 | 0.470133 | 0.765591 | 0.765591 |
| 5nM-NA  | -1.0189  | -1.0189  | -0.22111 | 0.818525 | 1.775289 | 2.179573 | 2.179573 |
| -NA     | -0.13966 | -0.13966 | 0.009428 | 0.250177 | 0.722824 | 1.285486 | 1.285486 |
| 50nM+NA | -2.03149 | -2.03149 | -1.8446  | -0.25094 | 0.158566 | 0.485773 | 0.485773 |
| 5nM+NA  | -1.50358 | -1.50358 | -0.98838 | -0.18016 | 0.518195 | 1.199578 | 1.199578 |
| +NA     | -1.70761 | -1.70761 | -0.87079 | -0.02825 | 1.09678  | 1.138162 | 1.138162 |

### Oneway Anova

#### Summary of Fit

|                            |          |
|----------------------------|----------|
| Rsquare                    | 0.202891 |
| Adj Rsquare                | 0.07004  |
| Root Mean Square Error     | 0.973983 |
| Mean of Response           | -1.9e-17 |
| Observations (or Sum Wgts) | 36       |

#### Analysis of Variance

| Source   | DF | Sum of Squares | Mean Square | F Ratio | Prob > F |
|----------|----|----------------|-------------|---------|----------|
| Label    | 5  | 7.243848       | 1.44877     | 1.5272  | 0.2111   |
| Error    | 30 | 28.459264      | 0.94864     |         |          |
| C. Total | 35 | 35.703113      |             |         |          |

#### Means for Oneway Anova

| Level   | Number | Mean     | Std Error | Lower 95% | Upper 95% |
|---------|--------|----------|-----------|-----------|-----------|
| 50nM-NA | 6      | -0.26976 | 0.39763   | -1.082    | 0.5423    |
| 5nM-NA  | 6      | 0.74718  | 0.39763   | -0.065    | 1.5592    |
| -NA     | 6      | 0.37343  | 0.39763   | -0.439    | 1.1855    |
| 50nM+NA | 6      | -0.63006 | 0.39763   | -1.442    | 0.1820    |
| 5nM+NA  | 6      | -0.19832 | 0.39763   | -1.010    | 0.6137    |
| +NA     | 6      | -0.02247 | 0.39763   | -0.835    | 0.7896    |

Std Error uses a pooled estimate of error variance

### Means Comparisons

#### Comparisons with a control using Dunnett's Method

### Oneway Analysis of 6-phospho-D-gluconate By Label

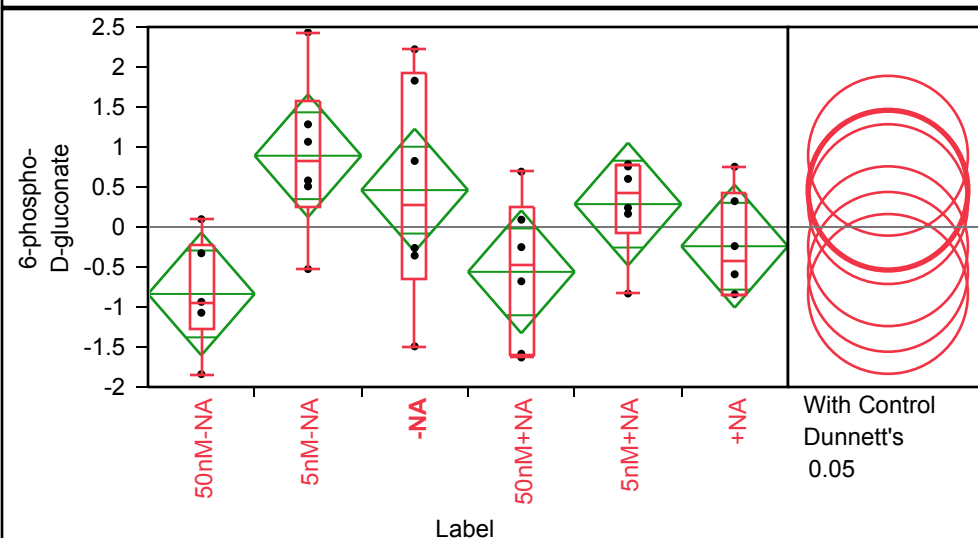

### Quantiles

| Level   | Minimum  | 10%      | 25%      | Median   | 75%      | 90%      | Maximum  |
|---------|----------|----------|----------|----------|----------|----------|----------|
| 50nM-NA | -1.83954 | -1.83954 | -1.26393 | -0.93907 | -0.22174 | 0.097472 | 0.097472 |
| 5nM-NA  | -0.5255  | -0.5255  | 0.249468 | 0.8234   | 1.570698 | 2.433183 | 2.433183 |
| -NA     | -1.49187 | -1.49187 | -0.64058 | 0.281691 | 1.926964 | 2.221025 | 2.221025 |
| 50nM+NA | -1.63105 | -1.63105 | -1.59637 | -0.46518 | 0.241328 | 0.691366 | 0.691366 |
| 5nM+NA  | -0.83109 | -0.83109 | -0.08451 | 0.420821 | 0.763483 | 0.784206 | 0.784206 |
| +NA     | -0.84769 | -0.84769 | -0.84221 | -0.41484 | 0.430294 | 0.753209 | 0.753209 |

### Oneway Anova

#### Summary of Fit

|                            |          |
|----------------------------|----------|
| Rsquare                    | 0.33768  |
| Adj Rsquare                | 0.227293 |
| Root Mean Square Error     | 0.920488 |
| Mean of Response           | 2.78e-10 |
| Observations (or Sum Wgts) | 36       |

#### Analysis of Variance

| Source   | DF | Sum of Squares | Mean Square | F Ratio | Prob > F |
|----------|----|----------------|-------------|---------|----------|
| Label    | 5  | 12.959677      | 2.59194     | 3.0591  | 0.0239 * |
| Error    | 30 | 25.418932      | 0.84730     |         |          |
| C. Total | 35 | 38.378608      |             |         |          |

#### Means for Oneway Anova

| Level   | Number | Mean     | Std Error | Lower 95% | Upper 95% |
|---------|--------|----------|-----------|-----------|-----------|
| 50nM-NA | 6      | -0.83673 | 0.37579   | -1.604    | -0.069    |
| 5nM-NA  | 6      | 0.89091  | 0.37579   | 0.123     | 1.658     |
| -NA     | 6      | 0.46078  | 0.37579   | -0.307    | 1.228     |
| 50nM+NA | 6      | -0.56059 | 0.37579   | -1.328    | 0.207     |
| 5nM+NA  | 6      | 0.28595  | 0.37579   | -0.482    | 1.053     |
| +NA     | 6      | -0.24031 | 0.37579   | -1.008    | 0.527     |

Std Error uses a pooled estimate of error variance

### Means Comparisons

#### Comparisons with a control using Dunnett's Method

### Oneway Analysis of 6-phospho-D-glucono-1,5-lactone By Label

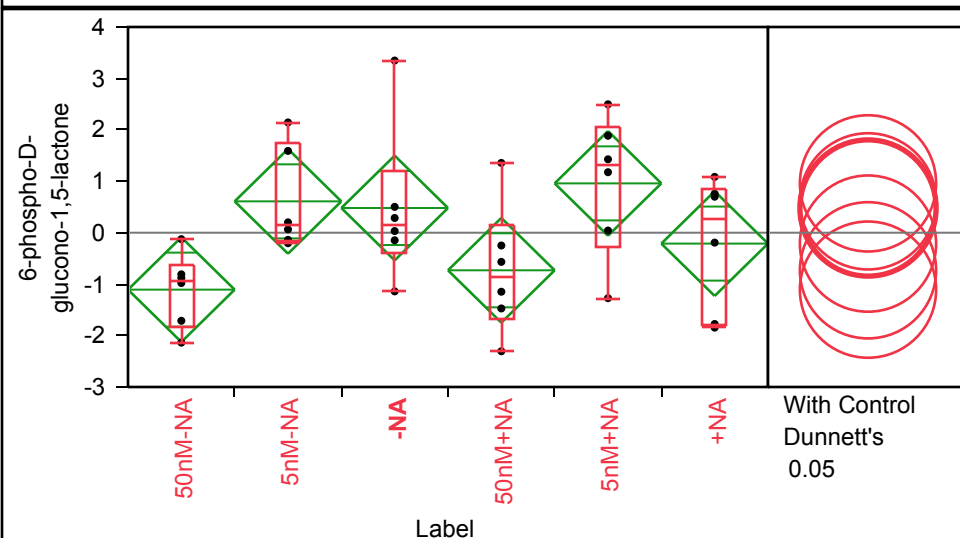

### Quantiles

| Level   | Minimum  | 10%      | 25%      | Median   | 75%      | 90%      | Maximum  |
|---------|----------|----------|----------|----------|----------|----------|----------|
| 50nM-NA | -2.13711 | -2.13711 | -1.81884 | -0.92865 | -0.63815 | -0.12513 | -0.12513 |
| 5nM-NA  | -0.20387 | -0.20387 | -0.15473 | 0.133062 | 1.72876  | 2.144123 | 2.144123 |
| -NA     | -1.14043 | -1.14043 | -0.3954  | 0.159516 | 1.21373  | 3.347747 | 3.347747 |
| 50nM+NA | -2.30485 | -2.30485 | -1.68085 | -0.85736 | 0.152372 | 1.356705 | 1.356705 |
| 5nM+NA  | -1.27281 | -1.27281 | -0.28658 | 1.301995 | 2.03819  | 2.496518 | 2.496518 |
| +NA     | -1.84528 | -1.84528 | -1.79275 | 0.253843 | 0.840071 | 1.085525 | 1.085525 |

### Oneway Anova

#### Summary of Fit

|                            |          |
|----------------------------|----------|
| Rsquare                    | 0.308547 |
| Adj Rsquare                | 0.193305 |
| Root Mean Square Error     | 1.221051 |
| Mean of Response           | -3.1e-17 |
| Observations (or Sum Wgts) | 36       |

#### Analysis of Variance

| Source   | DF | Sum of Squares | Mean Square | F Ratio | Prob > F |
|----------|----|----------------|-------------|---------|----------|
| Label    | 5  | 19.959405      | 3.99188     | 2.6774  | 0.0408 * |
| Error    | 30 | 44.728993      | 1.49097     |         |          |
| C. Total | 35 | 64.688398      |             |         |          |

#### Means for Oneway Anova

| Level   | Number | Mean    | Std Error | Lower 95% | Upper 95% |
|---------|--------|---------|-----------|-----------|-----------|
| 50nM-NA | 6      | -1.1069 | 0.49849   | -2.125    | -0.089    |
| 5nM-NA  | 6      | 0.6097  | 0.49849   | -0.408    | 1.628     |
| -NA     | 6      | 0.4803  | 0.49849   | -0.538    | 1.498     |
| 50nM+NA | 6      | -0.7308 | 0.49849   | -1.749    | 0.287     |
| 5nM+NA  | 6      | 0.9592  | 0.49849   | -0.059    | 1.977     |
| +NA     | 6      | -0.2115 | 0.49849   | -1.230    | 0.807     |

Std Error uses a pooled estimate of error variance

### Means Comparisons

#### Comparisons with a control using Dunnett's Method

### Oneway Analysis of 7-methylguanosine By Label

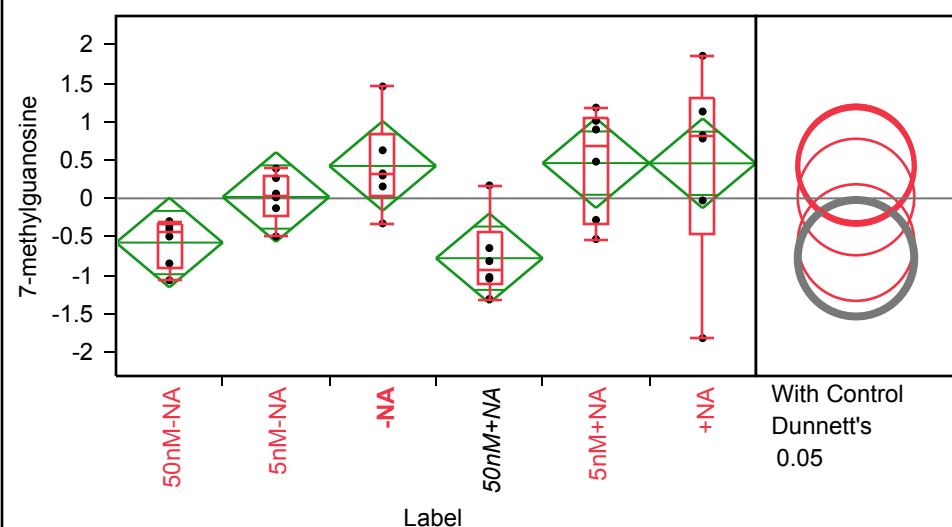

### Quantiles

| Level   | Minimum  | 10%      | 25%      | Median   | 75%      | 90%      | Maximum  |
|---------|----------|----------|----------|----------|----------|----------|----------|
| 50nM-NA | -1.06775 | -1.06775 | -0.90331 | -0.44752 | -0.33656 | -0.29791 | -0.29791 |
| 5nM-NA  | -0.4967  | -0.4967  | -0.22045 | 0.0379   | 0.296151 | 0.389088 | 0.389088 |
| -NA     | -0.32675 | -0.32675 | 0.034621 | 0.311469 | 0.834644 | 1.45811  | 1.45811  |
| 50nM+NA | -1.31248 | -1.31248 | -1.1134  | -0.92198 | -0.44405 | 0.168313 | 0.168313 |
| 5nM+NA  | -0.53041 | -0.53041 | -0.3433  | 0.688308 | 1.054113 | 1.182878 | 1.182878 |
| +NA     | -1.82244 | -1.82244 | -0.47633 | 0.800548 | 1.313654 | 1.858333 | 1.858333 |

### Oneway Anova

#### Summary of Fit

|                            |          |
|----------------------------|----------|
| Rsquare                    | 0.385926 |
| Adj Rsquare                | 0.283581 |
| Root Mean Square Error     | 0.700239 |
| Mean of Response           | 5.56e-10 |
| Observations (or Sum Wgts) | 36       |

#### Analysis of Variance

| Source   | DF | Sum of Squares | Mean Square | F Ratio | Prob > F |
|----------|----|----------------|-------------|---------|----------|
| Label    | 5  | 9.244811       | 1.84896     | 3.7708  | 0.0091 * |
| Error    | 30 | 14.710041      | 0.49033     |         |          |
| C. Total | 35 | 23.954852      |             |         |          |

#### Means for Oneway Anova

| Level   | Number | Mean     | Std Error | Lower 95% | Upper 95% |
|---------|--------|----------|-----------|-----------|-----------|
| 50nM-NA | 6      | -0.57644 | 0.28587   | -1.160    | 0.00739   |
| 5nM-NA  | 6      | 0.01750  | 0.28587   | -0.566    | 0.601     |
| -NA     | 6      | 0.42270  | 0.28587   | -0.161    | 1.007     |
| 50nM+NA | 6      | -0.78056 | 0.28587   | -1.364    | -0.197    |
| 5nM+NA  | 6      | 0.45989  | 0.28587   | -0.124    | 1.044     |
| +NA     | 6      | 0.45691  | 0.28587   | -0.127    | 1.041     |

Std Error uses a pooled estimate of error variance

### Means Comparisons

#### Comparisons with a control using Dunnett's Method

### Oneway Analysis of acetoacetate By Label

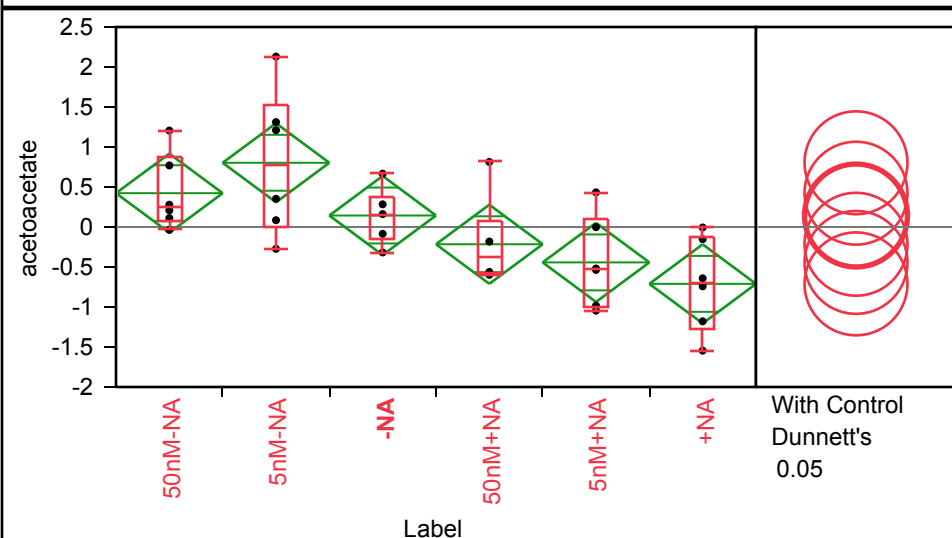

### Quantiles

| Level   | Minimum  | 10%      | 25%      | Median   | 75%      | 90%      | Maximum  |
|---------|----------|----------|----------|----------|----------|----------|----------|
| 50nM-NA | -0.03569 | -0.03569 | 0.074264 | 0.243195 | 0.878597 | 1.205337 | 1.205337 |
| 5nM-NA  | -0.27308 | -0.27308 | -0.00449 | 0.78114  | 1.516133 | 2.129953 | 2.129953 |
| -NA     | -0.31787 | -0.31787 | -0.14342 | 0.157949 | 0.379028 | 0.666075 | 0.666075 |
| 50nM+NA | -0.59755 | -0.59755 | -0.57936 | -0.37716 | 0.066705 | 0.812989 | 0.812989 |
| 5nM+NA  | -1.04604 | -1.04604 | -0.99947 | -0.5279  | 0.106561 | 0.4325   | 0.4325   |
| +NA     | -1.54537 | -1.54537 | -1.2705  | -0.69131 | -0.11534 | -0.00637 | -0.00637 |

### Oneway Anova

#### Summary of Fit

|                            |          |
|----------------------------|----------|
| Rsquare                    | 0.475246 |
| Adj Rsquare                | 0.387787 |
| Root Mean Square Error     | 0.592791 |
| Mean of Response           | 5.56e-11 |
| Observations (or Sum Wgts) | 36       |

#### Analysis of Variance

| Source   | DF | Sum of Squares | Mean Square | F Ratio | Prob > F |
|----------|----|----------------|-------------|---------|----------|
| Label    | 5  | 9.547441       | 1.90949     | 5.4339  | 0.0011 * |
| Error    | 30 | 10.542044      | 0.35140     |         |          |
| C. Total | 35 | 20.089485      |             |         |          |

#### Means for Oneway Anova

| Level   | Number | Mean     | Std Error | Lower 95% | Upper 95% |
|---------|--------|----------|-----------|-----------|-----------|
| 50nM-NA | 6      | 0.42277  | 0.24201   | -0.071    | 0.917     |
| 5nM-NA  | 6      | 0.80262  | 0.24201   | 0.308     | 1.297     |
| -NA     | 6      | 0.14370  | 0.24201   | -0.351    | 0.638     |
| 50nM+NA | 6      | -0.21571 | 0.24201   | -0.710    | 0.279     |
| 5nM+NA  | 6      | -0.44256 | 0.24201   | -0.937    | 0.052     |
| +NA     | 6      | -0.71082 | 0.24201   | -1.205    | -0.217    |

Std Error uses a pooled estimate of error variance

### Means Comparisons

#### Comparisons with a control using Dunnett's Method

### Oneway Analysis of Acetylcarnitine By Label

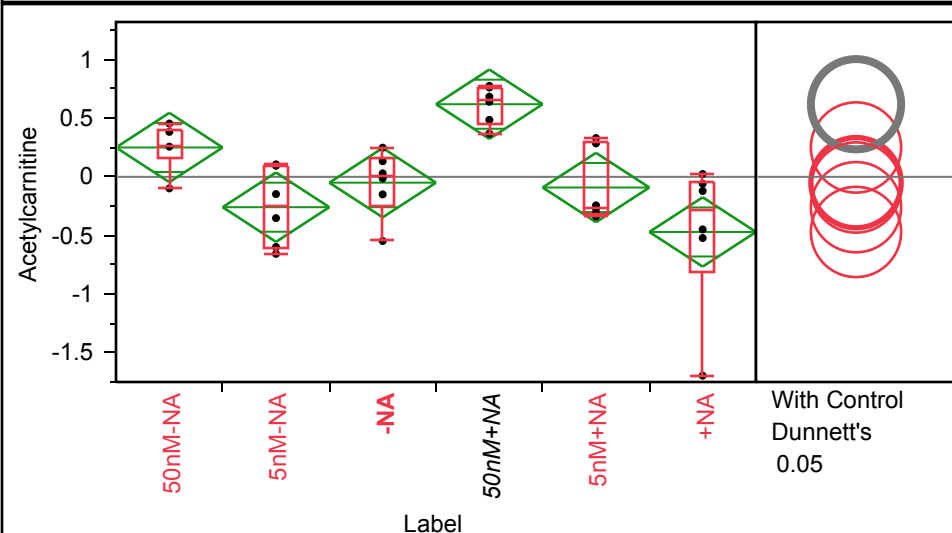

### Quantiles

| Level   | Minimum  | 10%      | 25%      | Median   | 75%      | 90%      | Maximum  |
|---------|----------|----------|----------|----------|----------|----------|----------|
| 50nM-NA | -0.09849 | -0.09849 | 0.162544 | 0.256481 | 0.401422 | 0.454408 | 0.454408 |
| 5nM-NA  | -0.65681 | -0.65681 | -0.61309 | -0.2496  | 0.09747  | 0.106517 | 0.106517 |
| -NA     | -0.54722 | -0.54722 | -0.24907 | 0.008503 | 0.162    | 0.248556 | 0.248556 |
| 50nM+NA | 0.368979 | 0.368979 | 0.45669  | 0.662367 | 0.765262 | 0.775754 | 0.775754 |
| 5nM+NA  | -0.33761 | -0.33761 | -0.31625 | -0.25767 | 0.296632 | 0.33058  | 0.33058  |
| +NA     | -1.69575 | -1.69575 | -0.81534 | -0.28451 | -0.03812 | 0.024084 | 0.024084 |

### Oneway Anova

#### Summary of Fit

|                            |          |
|----------------------------|----------|
| Rsquare                    | 0.542182 |
| Adj Rsquare                | 0.465879 |
| Root Mean Square Error     | 0.354804 |
| Mean of Response           | -2.8e-10 |
| Observations (or Sum Wgts) | 36       |

#### Analysis of Variance

| Source   | DF | Sum of Squares | Mean Square | F Ratio | Prob > F |
|----------|----|----------------|-------------|---------|----------|
| Label    | 5  | 4.4724954      | 0.894499    | 7.1057  | 0.0002 * |
| Error    | 30 | 3.7765682      | 0.125886    |         |          |
| C. Total | 35 | 8.2490637      |             |         |          |

#### Means for Oneway Anova

| Level   | Number | Mean     | Std Error | Lower 95% | Upper 95% |
|---------|--------|----------|-----------|-----------|-----------|
| 50nM-NA | 6      | 0.25037  | 0.14485   | -0.0455   | 0.5462    |
| 5nM-NA  | 6      | -0.25893 | 0.14485   | -0.5547   | 0.0369    |
| -NA     | 6      | -0.04970 | 0.14485   | -0.3455   | 0.2461    |
| 50nM+NA | 6      | 0.61953  | 0.14485   | 0.3237    | 0.9153    |
| 5nM+NA  | 6      | -0.09103 | 0.14485   | -0.3868   | 0.2048    |
| +NA     | 6      | -0.47023 | 0.14485   | -0.7661   | -0.1744   |

Std Error uses a pooled estimate of error variance

### Means Comparisons

#### Comparisons with a control using Dunnett's Method

### Oneway Analysis of acetyl-CoA By Label

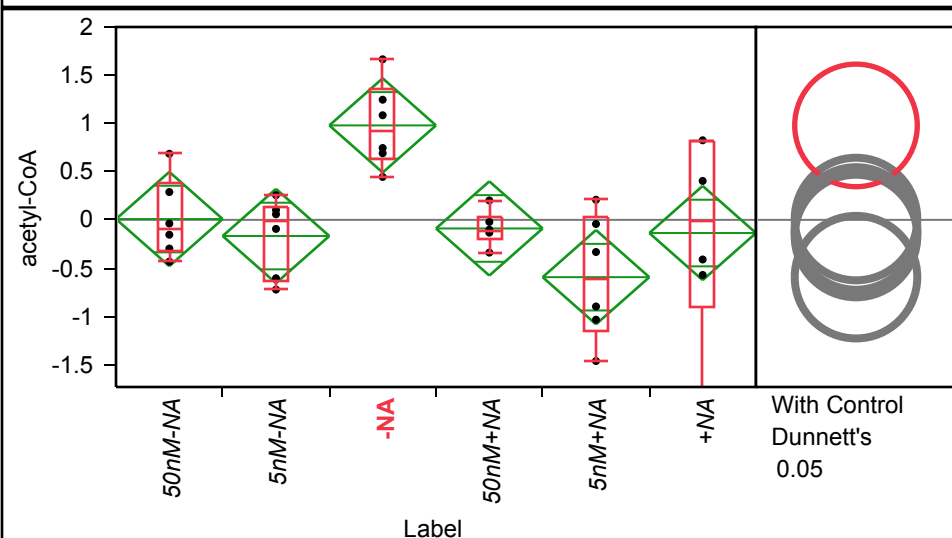

### Quantiles

| Level   | Minimum  | 10%      | 25%      | Median   | 75%      | 90%      | Maximum  |
|---------|----------|----------|----------|----------|----------|----------|----------|
| 50nM-NA | -0.43338 | -0.43338 | -0.33154 | -0.09612 | 0.387605 | 0.685471 | 0.685471 |
| 5nM-NA  | -0.72285 | -0.72285 | -0.63503 | -0.01813 | 0.140952 | 0.256186 | 0.256186 |
| -NA     | 0.445089 | 0.445089 | 0.629514 | 0.914786 | 1.350688 | 1.665058 | 1.665058 |
| 50nM+NA | -0.3395  | -0.3395  | -0.1905  | -0.11759 | 0.034405 | 0.201147 | 0.201147 |
| 5nM+NA  | -1.46387 | -1.46387 | -1.14238 | -0.61604 | 0.020031 | 0.208098 | 0.208098 |
| +NA     | -1.88359 | -1.88359 | -0.89974 | -0.00355 | 0.819459 | 0.825145 | 0.825145 |

### Oneway Anova

#### Summary of Fit

|                            |          |
|----------------------------|----------|
| Rsquare                    | 0.443389 |
| Adj Rsquare                | 0.35062  |
| Root Mean Square Error     | 0.585908 |
| Mean of Response           | 2.78e-10 |
| Observations (or Sum Wgts) | 36       |

#### Analysis of Variance

| Source   | DF | Sum of Squares | Mean Square | F Ratio | Prob > F |
|----------|----|----------------|-------------|---------|----------|
| Label    | 5  | 8.203755       | 1.64075     | 4.7795  | 0.0025 * |
| Error    | 30 | 10.298640      | 0.34329     |         |          |
| C. Total | 35 | 18.502395      |             |         |          |

#### Means for Oneway Anova

| Level   | Number | Mean     | Std Error | Lower 95% | Upper 95% |
|---------|--------|----------|-----------|-----------|-----------|
| 50nM-NA | 6      | 0.00843  | 0.23920   | -0.480    | 0.497     |
| 5nM-NA  | 6      | -0.16769 | 0.23920   | -0.656    | 0.321     |
| -NA     | 6      | 0.97943  | 0.23920   | 0.491     | 1.468     |
| 50nM+NA | 6      | -0.08926 | 0.23920   | -0.578    | 0.399     |
| 5nM+NA  | 6      | -0.59429 | 0.23920   | -1.083    | -0.106    |
| +NA     | 6      | -0.13663 | 0.23920   | -0.625    | 0.352     |

Std Error uses a pooled estimate of error variance

### Means Comparisons

#### Comparisons with a control using Dunnett's Method

### Oneway Analysis of Acetyllysine By Label

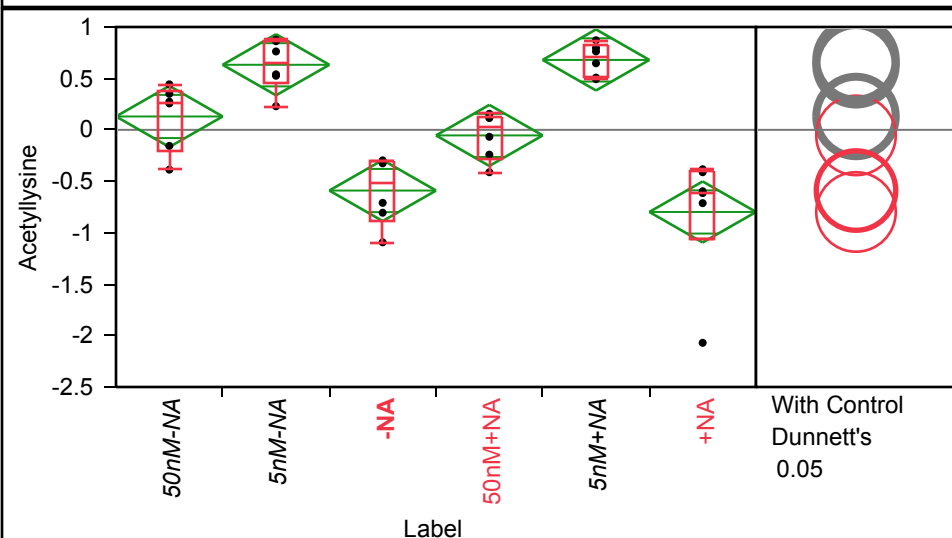

### Quantiles

| Level   | Minimum  | 10%      | 25%      | Median   | 75%      | 90%      | Maximum  |
|---------|----------|----------|----------|----------|----------|----------|----------|
| 50nM-NA | -0.38694 | -0.38694 | -0.21368 | 0.265195 | 0.373401 | 0.442474 | 0.442474 |
| 5nM-NA  | 0.229527 | 0.229527 | 0.451838 | 0.65107  | 0.86542  | 0.876003 | 0.876003 |
| -NA     | -1.09332 | -1.09332 | -0.87756 | -0.51737 | -0.30672 | -0.29681 | -0.29681 |
| 50nM+NA | -0.41205 | -0.41205 | -0.28384 | 0.023745 | 0.13298  | 0.155985 | 0.155985 |
| 5nM+NA  | 0.492905 | 0.492905 | 0.504225 | 0.704768 | 0.815861 | 0.870952 | 0.870952 |
| +NA     | -2.07068 | -2.07068 | -1.0521  | -0.60576 | -0.40476 | -0.38314 | -0.38314 |

### Oneway Anova

#### Summary of Fit

|                            |          |
|----------------------------|----------|
| Rsquare                    | 0.746537 |
| Adj Rsquare                | 0.704294 |
| Root Mean Square Error     | 0.356118 |
| Mean of Response           | 8.33e-10 |
| Observations (or Sum Wgts) | 36       |

#### Analysis of Variance

| Source   | DF | Sum of Squares | Mean Square | F Ratio | Prob > F |
|----------|----|----------------|-------------|---------|----------|
| Label    | 5  | 11.205929      | 2.24119     | 17.6721 | <.0001 * |
| Error    | 30 | 3.804610       | 0.12682     |         |          |
| C. Total | 35 | 15.010539      |             |         |          |

#### Means for Oneway Anova

| Level   | Number | Mean     | Std Error | Lower 95% | Upper 95% |
|---------|--------|----------|-----------|-----------|-----------|
| 50nM-NA | 6      | 0.13006  | 0.14538   | -0.167    | 0.4270    |
| 5nM-NA  | 6      | 0.63258  | 0.14538   | 0.336     | 0.9295    |
| -NA     | 6      | -0.59009 | 0.14538   | -0.887    | -0.2932   |
| 50nM+NA | 6      | -0.05406 | 0.14538   | -0.351    | 0.2429    |
| 5nM+NA  | 6      | 0.67981  | 0.14538   | 0.383     | 0.9767    |
| +NA     | 6      | -0.79831 | 0.14538   | -1.095    | -0.5014   |

Std Error uses a pooled estimate of error variance

### Means Comparisons

#### Comparisons with a control using Dunnett's Method

### Oneway Analysis of aconitate By Label

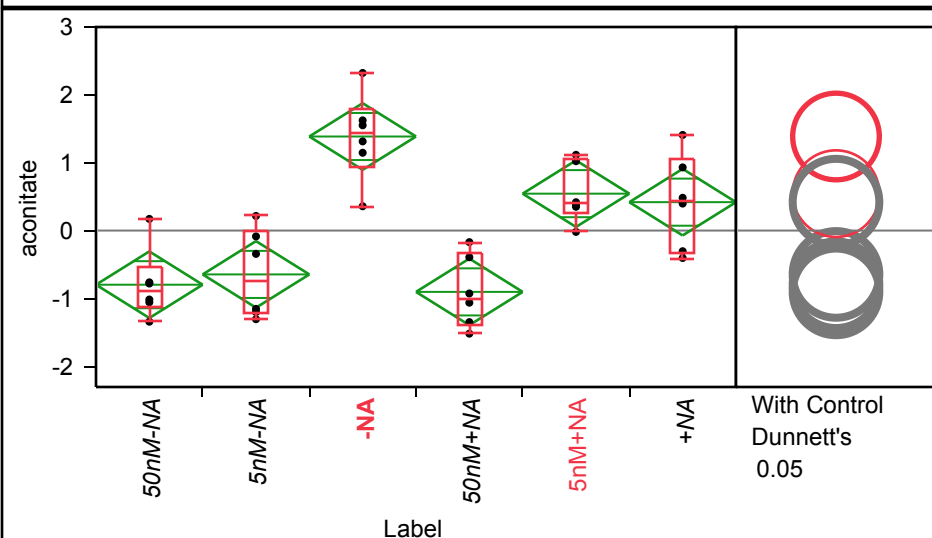

### Quantiles

| Level   | Minimum  | 10%      | 25%      | Median   | 75%      | 90%      | Maximum  |
|---------|----------|----------|----------|----------|----------|----------|----------|
| 50nM-NA | -1.34334 | -1.34334 | -1.12878 | -0.89842 | -0.52961 | 0.171812 | 0.171812 |
| 5nM-NA  | -1.30649 | -1.30649 | -1.22845 | -0.74918 | -0.01076 | 0.215249 | 0.215249 |
| -NA     | 0.358004 | 0.358004 | 0.94953  | 1.432818 | 1.798408 | 2.322271 | 2.322271 |
| 50nM+NA | -1.51932 | -1.51932 | -1.3919  | -0.99527 | -0.33742 | -0.17085 | -0.17085 |
| 5nM+NA  | -0.01955 | -0.01955 | 0.257829 | 0.396963 | 1.045656 | 1.115989 | 1.115989 |
| +NA     | -0.40465 | -0.40465 | -0.32951 | 0.440378 | 1.050314 | 1.408354 | 1.408354 |

### Oneway Anova

#### Summary of Fit

|                            |          |
|----------------------------|----------|
| Rsquare                    | 0.71119  |
| Adj Rsquare                | 0.663055 |
| Root Mean Square Error     | 0.588476 |
| Mean of Response           | 2.47e-17 |
| Observations (or Sum Wgts) | 36       |

#### Analysis of Variance

| Source   | DF | Sum of Squares | Mean Square | F Ratio | Prob > F |
|----------|----|----------------|-------------|---------|----------|
| Label    | 5  | 25.583035      | 5.11661     | 14.7749 | <.0001 * |
| Error    | 30 | 10.389120      | 0.34630     |         |          |
| C. Total | 35 | 35.972156      |             |         |          |

#### Means for Oneway Anova

| Level   | Number | Mean    | Std Error | Lower 95% | Upper 95% |
|---------|--------|---------|-----------|-----------|-----------|
| 50nM-NA | 6      | -0.7982 | 0.24024   | -1.289    | -0.308    |
| 5nM-NA  | 6      | -0.6464 | 0.24024   | -1.137    | -0.156    |
| -NA     | 6      | 1.3861  | 0.24024   | 0.895     | 1.877     |
| 50nM+NA | 6      | -0.9038 | 0.24024   | -1.394    | -0.413    |
| 5nM+NA  | 6      | 0.5438  | 0.24024   | 0.053     | 1.034     |
| +NA     | 6      | 0.4185  | 0.24024   | -0.072    | 0.909     |

Std Error uses a pooled estimate of error variance

### Means Comparisons

#### Comparisons with a control using Dunnett's Method

### Oneway Analysis of Adenine By Label

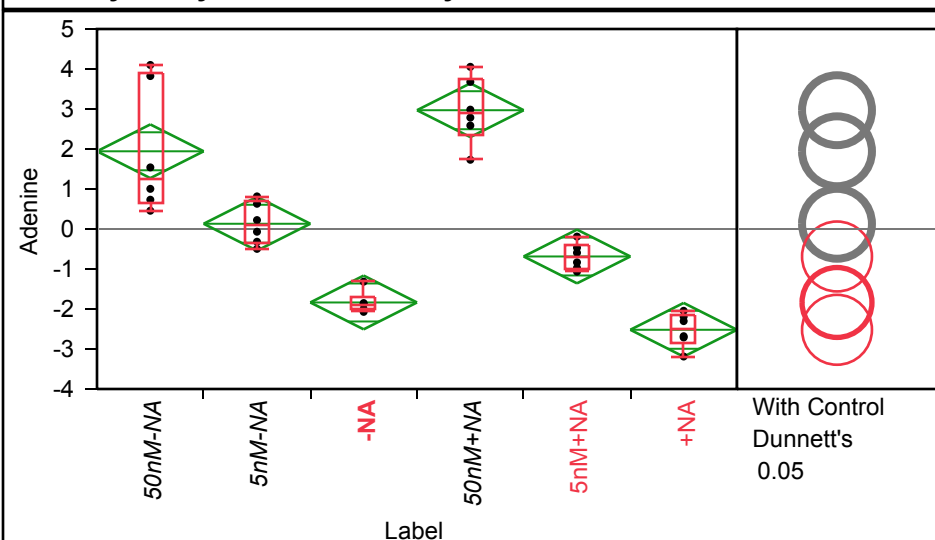

### Quantiles

| Level   | Minimum  | 10%      | 25%      | Median   | 75%      | 90%      | Maximum  |
|---------|----------|----------|----------|----------|----------|----------|----------|
| 50nM-NA | 0.456816 | 0.456816 | 0.663089 | 1.271783 | 3.892978 | 4.100561 | 4.100561 |
| 5nM-NA  | -0.49656 | -0.49656 | -0.36343 | 0.077191 | 0.677009 | 0.814795 | 0.814795 |
| -NA     | -2.07141 | -2.07141 | -2.02251 | -1.88688 | -1.71827 | -1.3169  | -1.3169  |
| 50nM+NA | 1.730777 | 1.730777 | 2.372974 | 2.884047 | 3.771701 | 4.054288 | 4.054288 |
| 5nM+NA  | -1.06602 | -1.06602 | -0.99464 | -0.71406 | -0.39686 | -0.18963 | -0.18963 |
| +NA     | -3.18796 | -3.18796 | -2.83123 | -2.49152 | -2.15351 | -2.04506 | -2.04506 |

### Oneway Anova

#### Summary of Fit

|                            |          |
|----------------------------|----------|
| Rsquare                    | 0.875433 |
| Adj Rsquare                | 0.854672 |
| Root Mean Square Error     | 0.805582 |
| Mean of Response           | -8.33e-9 |
| Observations (or Sum Wgts) | 36       |

#### Analysis of Variance

| Source   | DF | Sum of Squares | Mean Square | F Ratio | Prob > F |
|----------|----|----------------|-------------|---------|----------|
| Label    | 5  | 136.82390      | 27.3648     | 42.1670 | <.0001 * |
| Error    | 30 | 19.46886       | 0.6490      |         |          |
| C. Total | 35 | 156.29276      |             |         |          |

#### Means for Oneway Anova

| Level   | Number | Mean    | Std Error | Lower 95% | Upper 95% |
|---------|--------|---------|-----------|-----------|-----------|
| 50nM-NA | 6      | 1.9428  | 0.32888   | 1.271     | 2.614     |
| 5nM-NA  | 6      | 0.1308  | 0.32888   | -0.541    | 0.802     |
| -NA     | 6      | -1.8367 | 0.32888   | -2.508    | -1.165    |
| 50nM+NA | 6      | 2.9696  | 0.32888   | 2.298     | 3.641     |
| 5nM+NA  | 6      | -0.6868 | 0.32888   | -1.358    | -0.015    |
| +NA     | 6      | -2.5197 | 0.32888   | -3.191    | -1.848    |

Std Error uses a pooled estimate of error variance

### Means Comparisons

#### Comparisons with a control using Dunnett's Method

### Oneway Analysis of adenosine By Label

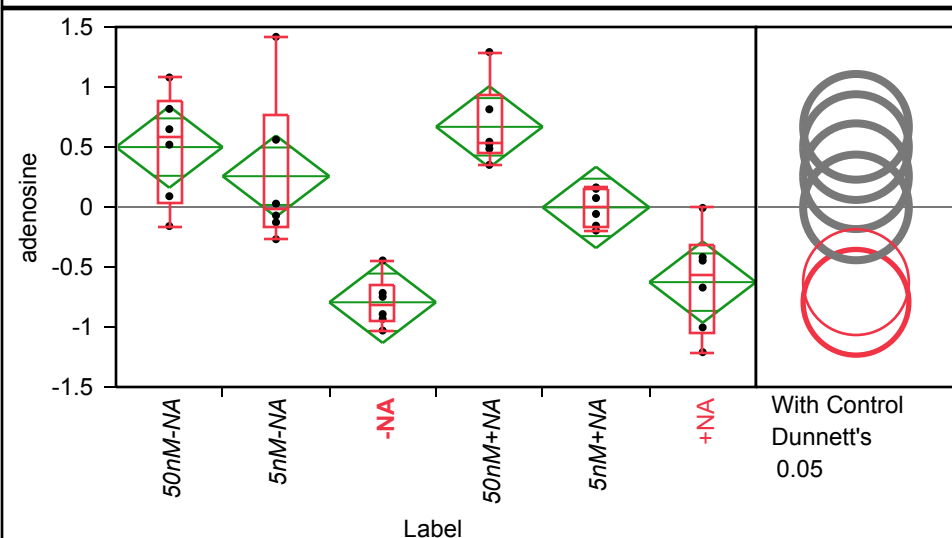

### Quantiles

| Level   | Minimum  | 10%      | 25%      | Median   | 75%      | 90%      | Maximum  |
|---------|----------|----------|----------|----------|----------|----------|----------|
| 50nM-NA | -0.15926 | -0.15926 | 0.027575 | 0.583929 | 0.883014 | 1.07912  | 1.07912  |
| 5nM-NA  | -0.26829 | -0.26829 | -0.16287 | -0.02154 | 0.774911 | 1.417908 | 1.417908 |
| -NA     | -1.0297  | -1.0297  | -0.95696 | -0.82047 | -0.64835 | -0.44538 | -0.44538 |
| 50nM+NA | 0.350952 | 0.350952 | 0.451802 | 0.533269 | 0.933369 | 1.291286 | 1.291286 |
| 5nM+NA  | -0.19646 | -0.19646 | -0.16586 | 0.008241 | 0.154536 | 0.163279 | 0.163279 |
| +NA     | -1.20978 | -1.20978 | -1.05524 | -0.55919 | -0.31527 | -0.0077  | -0.0077  |

### Oneway Anova

#### Summary of Fit

|                            |          |
|----------------------------|----------|
| Rsquare                    | 0.684054 |
| Adj Rsquare                | 0.631397 |
| Root Mean Square Error     | 0.405964 |
| Mean of Response           | -1.2e-17 |
| Observations (or Sum Wgts) | 36       |

#### Analysis of Variance

| Source   | DF | Sum of Squares | Mean Square | F Ratio | Prob > F |
|----------|----|----------------|-------------|---------|----------|
| Label    | 5  | 10.704728      | 2.14095     | 12.9906 | <.0001 * |
| Error    | 30 | 4.944215       | 0.16481     |         |          |
| C. Total | 35 | 15.648943      |             |         |          |

#### Means for Oneway Anova

| Level   | Number | Mean     | Std Error | Lower 95% | Upper 95% |
|---------|--------|----------|-----------|-----------|-----------|
| 50nM-NA | 6      | 0.49920  | 0.16573   | 0.161     | 0.838     |
| 5nM-NA  | 6      | 0.25656  | 0.16573   | -0.082    | 0.595     |
| -NA     | 6      | -0.79413 | 0.16573   | -1.133    | -0.456    |
| 50nM+NA | 6      | 0.66804  | 0.16573   | 0.330     | 1.007     |
| 5nM+NA  | 6      | -0.00346 | 0.16573   | -0.342    | 0.335     |
| +NA     | 6      | -0.62623 | 0.16573   | -0.965    | -0.288    |

Std Error uses a pooled estimate of error variance

### Means Comparisons

#### Comparisons with a control using Dunnett's Method

### Oneway Analysis of Adipic acid By Label

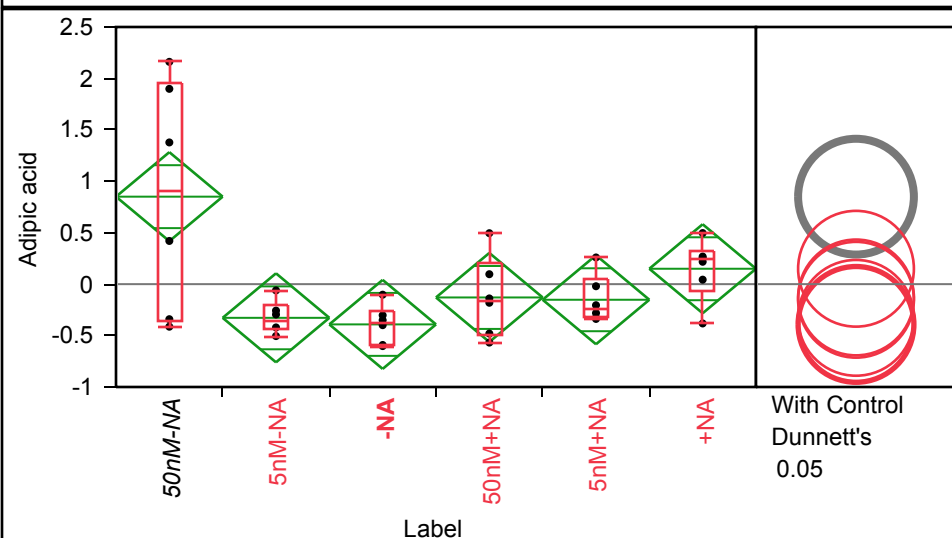

### Quantiles

| Level   | Minimum  | 10%      | 25%      | Median   | 75%      | 90%      | Maximum  |
|---------|----------|----------|----------|----------|----------|----------|----------|
| 50nM-NA | -0.41373 | -0.41373 | -0.35906 | 0.898748 | 1.96434  | 2.161242 | 2.161242 |
| 5nM-NA  | -0.50494 | -0.50494 | -0.44572 | -0.35806 | -0.20813 | -0.06097 | -0.06097 |
| -NA     | -0.6022  | -0.6022  | -0.59415 | -0.37466 | -0.25253 | -0.10269 | -0.10269 |
| 50nM+NA | -0.56807 | -0.56807 | -0.50244 | -0.15998 | 0.196263 | 0.495227 | 0.495227 |
| 5nM+NA  | -0.33826 | -0.33826 | -0.32869 | -0.24299 | 0.049614 | 0.259356 | 0.259356 |
| +NA     | -0.3822  | -0.3822  | -0.06291 | 0.235881 | 0.325292 | 0.496698 | 0.496698 |

### Oneway Anova

#### Summary of Fit

|                            |          |
|----------------------------|----------|
| Rsquare                    | 0.437256 |
| Adj Rsquare                | 0.343466 |
| Root Mean Square Error     | 0.518869 |
| Mean of Response           | -2.8e-10 |
| Observations (or Sum Wgts) | 36       |

#### Analysis of Variance

| Source   | DF | Sum of Squares | Mean Square | F Ratio | Prob > F |
|----------|----|----------------|-------------|---------|----------|
| Label    | 5  | 6.275702       | 1.25514     | 4.6620  | 0.0029 * |
| Error    | 30 | 8.076754       | 0.26923     |         |          |
| C. Total | 35 | 14.352456      |             |         |          |

#### Means for Oneway Anova

| Level   | Number | Mean     | Std Error | Lower 95% | Upper 95% |
|---------|--------|----------|-----------|-----------|-----------|
| 50nM-NA | 6      | 0.85048  | 0.21183   | 0.4179    | 1.2831    |
| 5nM-NA  | 6      | -0.32753 | 0.21183   | -0.7601   | 0.1051    |
| -NA     | 6      | -0.39136 | 0.21183   | -0.8240   | 0.0412    |
| 50nM+NA | 6      | -0.12946 | 0.21183   | -0.5621   | 0.3031    |
| 5nM+NA  | 6      | -0.15178 | 0.21183   | -0.5844   | 0.2808    |
| +NA     | 6      | 0.14966  | 0.21183   | -0.2830   | 0.5823    |

Std Error uses a pooled estimate of error variance

### Means Comparisons

#### Comparisons with a control using Dunnett's Method

### Oneway Analysis of ADP By Label

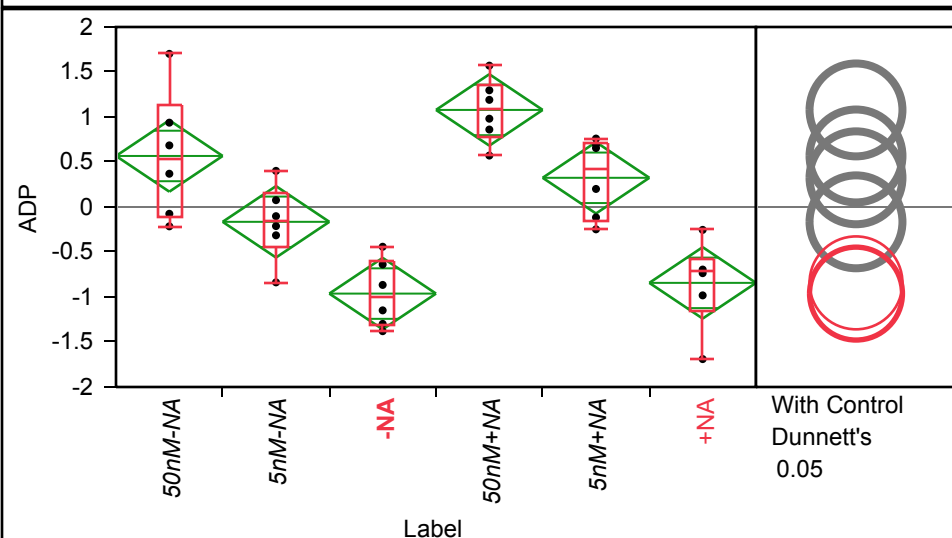

### Quantiles

| Level   | Minimum  | 10%      | 25%      | Median   | 75%      | 90%      | Maximum  |
|---------|----------|----------|----------|----------|----------|----------|----------|
| 50nM-NA | -0.21488 | -0.21488 | -0.11034 | 0.527025 | 1.128126 | 1.701416 | 1.701416 |
| 5nM-NA  | -0.83739 | -0.83739 | -0.44526 | -0.15701 | 0.157366 | 0.401352 | 0.401352 |
| -NA     | -1.37986 | -1.37986 | -1.31902 | -1.00715 | -0.58914 | -0.4418  | -0.4418  |
| 50nM+NA | 0.571568 | 0.571568 | 0.788331 | 1.085865 | 1.365217 | 1.570461 | 1.570461 |
| 5nM+NA  | -0.248   | -0.248   | -0.14881 | 0.427756 | 0.710731 | 0.76027  | 0.76027  |
| +NA     | -1.68996 | -1.68996 | -1.15896 | -0.71827 | -0.58503 | -0.25426 | -0.25426 |

### Oneway Anova

#### Summary of Fit

|                            |          |
|----------------------------|----------|
| Rsquare                    | 0.741841 |
| Adj Rsquare                | 0.698814 |
| Root Mean Square Error     | 0.475859 |
| Mean of Response           | -2.8e-10 |
| Observations (or Sum Wgts) | 36       |

#### Analysis of Variance

| Source   | DF | Sum of Squares | Mean Square | F Ratio | Prob > F |
|----------|----|----------------|-------------|---------|----------|
| Label    | 5  | 19.520957      | 3.90419     | 17.2415 | <.0001 * |
| Error    | 30 | 6.793253       | 0.22644     |         |          |
| C. Total | 35 | 26.314211      |             |         |          |

#### Means for Oneway Anova

| Level   | Number | Mean    | Std Error | Lower 95% | Upper 95% |
|---------|--------|---------|-----------|-----------|-----------|
| 50nM-NA | 6      | 0.5670  | 0.19427   | 0.170     | 0.964     |
| 5nM-NA  | 6      | -0.1648 | 0.19427   | -0.562    | 0.232     |
| -NA     | 6      | -0.9622 | 0.19427   | -1.359    | -0.565    |
| 50nM+NA | 6      | 1.0785  | 0.19427   | 0.682     | 1.475     |
| 5nM+NA  | 6      | 0.3244  | 0.19427   | -0.072    | 0.721     |
| +NA     | 6      | -0.8430 | 0.19427   | -1.240    | -0.446    |

Std Error uses a pooled estimate of error variance

### Means Comparisons

#### Comparisons with a control using Dunnett's Method

### Oneway Analysis of AICAR 3,5-Cyclic Phosphate By Label

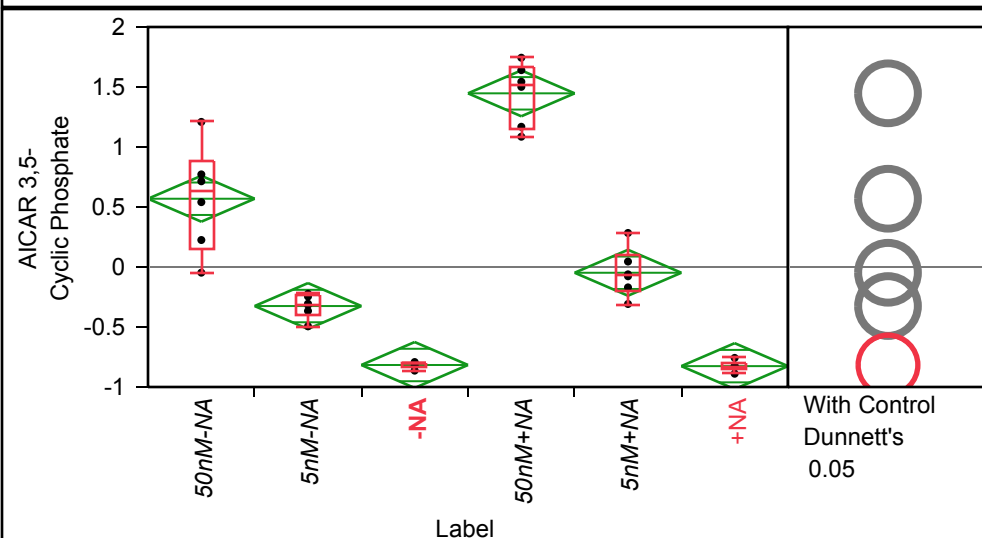

### Quantiles

| Level   | Minimum  | 10%      | 25%      | Median   | 75%      | 90%      | Maximum  |
|---------|----------|----------|----------|----------|----------|----------|----------|
| 50nM-NA | -0.04722 | -0.04722 | 0.156797 | 0.627453 | 0.88099  | 1.208936 | 1.208936 |
| 5nM-NA  | -0.49429 | -0.49429 | -0.39834 | -0.31096 | -0.24046 | -0.22362 | -0.22362 |
| -NA     | -0.86358 | -0.86358 | -0.83586 | -0.80684 | -0.80092 | -0.79207 | -0.79207 |
| 50nM+NA | 1.085752 | 1.085752 | 1.147775 | 1.522403 | 1.666335 | 1.743915 | 1.743915 |
| 5nM+NA  | -0.30837 | -0.30837 | -0.20452 | -0.06924 | 0.104874 | 0.283546 | 0.283546 |
| +NA     | -0.88942 | -0.88942 | -0.84976 | -0.82572 | -0.80558 | -0.75758 | -0.75758 |

### Oneway Anova

#### Summary of Fit

|                            |          |
|----------------------------|----------|
| Rsquare                    | 0.936436 |
| Adj Rsquare                | 0.925841 |
| Root Mean Square Error     | 0.229377 |
| Mean of Response           | -5.6e-10 |
| Observations (or Sum Wgts) | 36       |

#### Analysis of Variance

| Source   | DF | Sum of Squares | Mean Square | F Ratio | Prob > F |
|----------|----|----------------|-------------|---------|----------|
| Label    | 5  | 23.253395      | 4.65068     | 88.3924 | <.0001 * |
| Error    | 30 | 1.578421       | 0.05261     |         |          |
| C. Total | 35 | 24.831816      |             |         |          |

#### Means for Oneway Anova

| Level   | Number | Mean    | Std Error | Lower 95% | Upper 95% |
|---------|--------|---------|-----------|-----------|-----------|
| 50nM-NA | 6      | 0.5689  | 0.09364   | 0.378     | 0.760     |
| 5nM-NA  | 6      | -0.3254 | 0.09364   | -0.517    | -0.134    |
| -NA     | 6      | -0.8166 | 0.09364   | -1.008    | -0.625    |
| 50nM+NA | 6      | 1.4472  | 0.09364   | 1.256     | 1.638     |
| 5nM+NA  | 6      | -0.0480 | 0.09364   | -0.239    | 0.143     |
| +NA     | 6      | -0.8261 | 0.09364   | -1.017    | -0.635    |

Std Error uses a pooled estimate of error variance

### Means Comparisons

#### Comparisons with a control using Dunnett's Method

### Oneway Analysis of Ala-Ala By Label

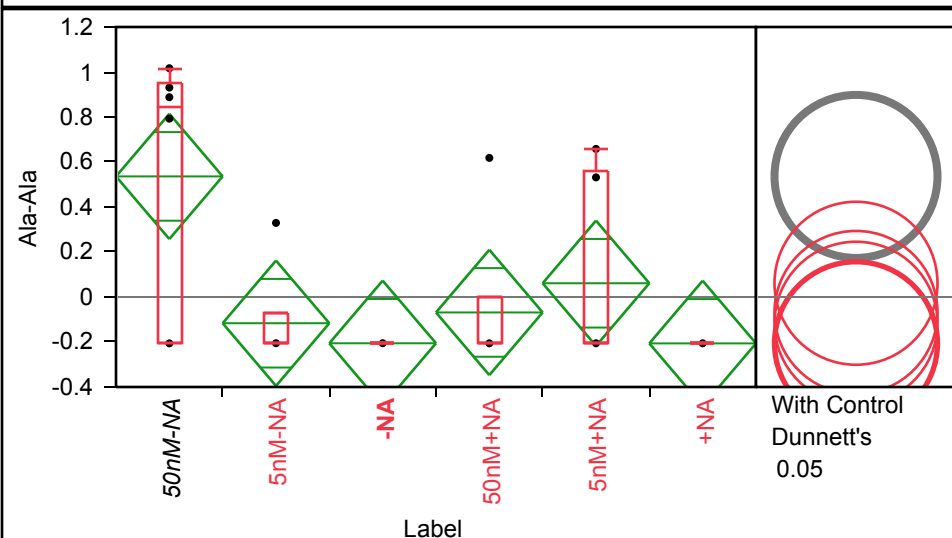

### Quantiles

| Level   | Minimum  | 10%      | 25%      | Median   | 75%      | 90%      | Maximum  |
|---------|----------|----------|----------|----------|----------|----------|----------|
| 50nM-NA | -0.20614 | -0.20614 | -0.20606 | 0.840199 | 0.952331 | 1.016762 | 1.016762 |
| 5nM-NA  | -0.20611 | -0.20611 | -0.20586 | -0.20565 | -0.07179 | 0.329272 | 0.329272 |
| -NA     | -0.20587 | -0.20587 | -0.20578 | -0.20567 | -0.20556 | -0.2054  | -0.2054  |
| 50nM+NA | -0.20611 | -0.20611 | -0.20604 | -0.20598 | 0.000126 | 0.61812  | 0.61812  |
| 5nM+NA  | -0.20614 | -0.20614 | -0.20596 | -0.20571 | 0.563285 | 0.658197 | 0.658197 |
| +NA     | -0.20755 | -0.20755 | -0.20658 | -0.20582 | -0.20578 | -0.20576 | -0.20576 |

### Oneway Anova

#### Summary of Fit

|                            |          |
|----------------------------|----------|
| Rsquare                    | 0.414101 |
| Adj Rsquare                | 0.316451 |
| Root Mean Square Error     | 0.333945 |
| Mean of Response           | 2.778e-9 |
| Observations (or Sum Wgts) | 36       |

#### Analysis of Variance

| Source   | DF | Sum of Squares | Mean Square | F Ratio | Prob > F |
|----------|----|----------------|-------------|---------|----------|
| Label    | 5  | 2.3645791      | 0.472916    | 4.2407  | 0.0049 * |
| Error    | 30 | 3.3455721      | 0.111519    |         |          |
| C. Total | 35 | 5.7101512      |             |         |          |

#### Means for Oneway Anova

| Level   | Number | Mean     | Std Error | Lower 95% | Upper 95% |
|---------|--------|----------|-----------|-----------|-----------|
| 50nM-NA | 6      | 0.53597  | 0.13633   | 0.2575    | 0.81440   |
| 5nM-NA  | 6      | -0.11657 | 0.13633   | -0.3950   | 0.16186   |
| -NA     | 6      | -0.20566 | 0.13633   | -0.4841   | 0.07276   |
| 50nM+NA | 6      | -0.06864 | 0.13633   | -0.3471   | 0.20979   |
| 5nM+NA  | 6      | 0.06106  | 0.13633   | -0.2174   | 0.33949   |
| +NA     | 6      | -0.20616 | 0.13633   | -0.4846   | 0.07226   |

Std Error uses a pooled estimate of error variance

### Means Comparisons

#### Comparisons with a control using Dunnett's Method

### Oneway Analysis of Ala-Gly By Label

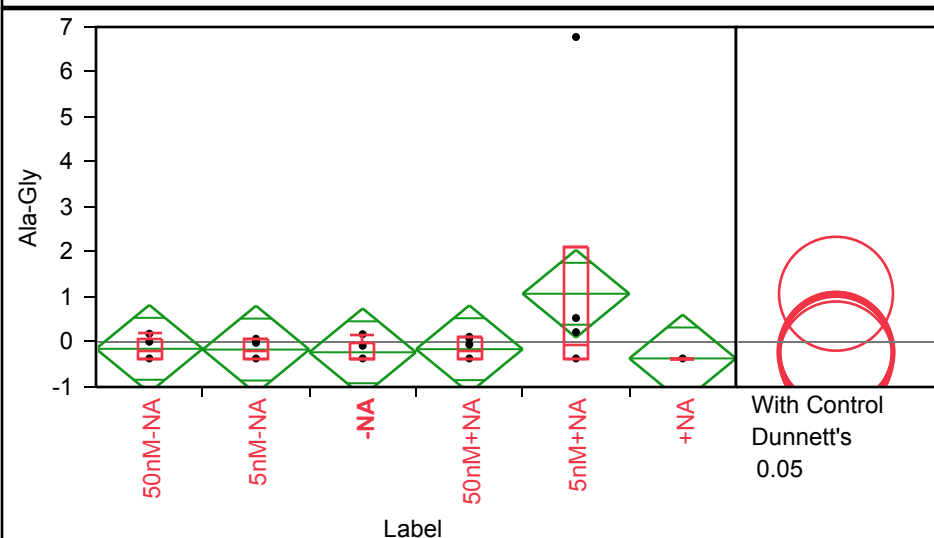

### Quantiles

| Level   | Minimum  | 10%      | 25%      | Median   | 75%      | 90%      | Maximum  |
|---------|----------|----------|----------|----------|----------|----------|----------|
| 50nM-NA | -0.36544 | -0.36544 | -0.36539 | -0.18271 | 0.050437 | 0.183814 | 0.183814 |
| 5nM-NA  | -0.36543 | -0.36543 | -0.36535 | -0.19181 | 0.045148 | 0.071653 | 0.071653 |
| -NA     | -0.36535 | -0.36535 | -0.36531 | -0.36523 | -0.01916 | 0.173762 | 0.173762 |
| 50nM+NA | -0.36543 | -0.36543 | -0.3654  | -0.21144 | 0.089646 | 0.114983 | 0.114983 |
| 5nM+NA  | -0.36547 | -0.36547 | -0.36545 | -0.07303 | 2.0941   | 6.77809  | 6.77809  |
| +NA     | -0.36592 | -0.36592 | -0.36559 | -0.36533 | -0.36532 | -0.36531 | -0.36531 |

### Oneway Anova

#### Summary of Fit

|                            |          |
|----------------------------|----------|
| Rsquare                    | 0.171807 |
| Adj Rsquare                | 0.033775 |
| Root Mean Square Error     | 1.166765 |
| Mean of Response           | -8.3e-11 |
| Observations (or Sum Wgts) | 36       |

#### Analysis of Variance

| Source   | DF | Sum of Squares | Mean Square | F Ratio | Prob > F |
|----------|----|----------------|-------------|---------|----------|
| Label    | 5  | 8.472228       | 1.69445     | 1.2447  | 0.3133   |
| Error    | 30 | 40.840220      | 1.36134     |         |          |
| C. Total | 35 | 49.312448      |             |         |          |

#### Means for Oneway Anova

| Level   | Number | Mean    | Std Error | Lower 95% | Upper 95% |
|---------|--------|---------|-----------|-----------|-----------|
| 50nM-NA | 6      | -0.1511 | 0.47633   | -1.124    | 0.8217    |
| 5nM-NA  | 6      | -0.1677 | 0.47633   | -1.141    | 0.8051    |
| -NA     | 6      | -0.2285 | 0.47633   | -1.201    | 0.7443    |
| 50nM+NA | 6      | -0.1596 | 0.47633   | -1.132    | 0.8132    |
| 5nM+NA  | 6      | 1.0723  | 0.47633   | 0.100     | 2.0451    |
| +NA     | 6      | -0.3655 | 0.47633   | -1.338    | 0.6073    |

Std Error uses a pooled estimate of error variance

### Means Comparisons

#### Comparisons with a control using Dunnett's Method

### Oneway Analysis of alanine By Label

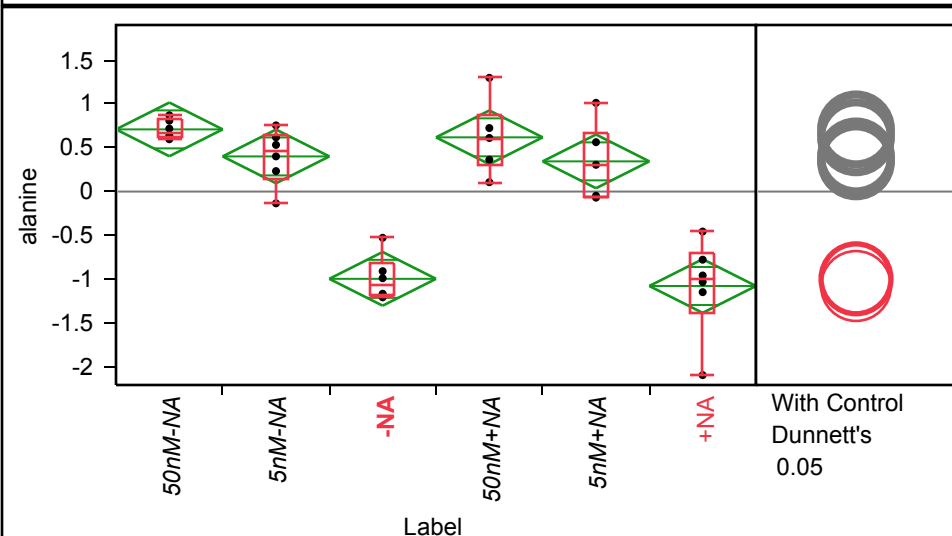

### Quantiles

| Level   | Minimum  | 10%      | 25%      | Median   | 75%      | 90%      | Maximum  |
|---------|----------|----------|----------|----------|----------|----------|----------|
| 50nM-NA | 0.596735 | 0.596735 | 0.615932 | 0.678944 | 0.824098 | 0.870025 | 0.870025 |
| 5nM-NA  | -0.13413 | -0.13413 | 0.141323 | 0.466771 | 0.652219 | 0.754712 | 0.754712 |
| -NA     | -1.20637 | -1.20637 | -1.18461 | -1.07714 | -0.81308 | -0.52748 | -0.52748 |
| 50nM+NA | 0.106742 | 0.106742 | 0.29918  | 0.609463 | 0.867733 | 1.297418 | 1.297418 |
| 5nM+NA  | -0.06937 | -0.06937 | -0.05339 | 0.303989 | 0.675544 | 1.012091 | 1.012091 |
| +NA     | -2.09418 | -2.09418 | -1.38411 | -0.99446 | -0.69703 | -0.45648 | -0.45648 |

### Oneway Anova

#### Summary of Fit

|                            |          |
|----------------------------|----------|
| Rsquare                    | 0.830888 |
| Adj Rsquare                | 0.802703 |
| Root Mean Square Error     | 0.367449 |
| Mean of Response           | -5.6e-10 |
| Observations (or Sum Wgts) | 36       |

#### Analysis of Variance

| Source   | DF | Sum of Squares | Mean Square | F Ratio | Prob > F |
|----------|----|----------------|-------------|---------|----------|
| Label    | 5  | 19.901406      | 3.98028     | 29.4795 | <.0001 * |
| Error    | 30 | 4.050555       | 0.13502     |         |          |
| C. Total | 35 | 23.951961      |             |         |          |

#### Means for Oneway Anova

| Level   | Number | Mean    | Std Error | Lower 95% | Upper 95% |
|---------|--------|---------|-----------|-----------|-----------|
| 50nM-NA | 6      | 0.7093  | 0.15001   | 0.403     | 1.016     |
| 5nM-NA  | 6      | 0.4009  | 0.15001   | 0.095     | 0.707     |
| -NA     | 6      | -0.9956 | 0.15001   | -1.302    | -0.689    |
| 50nM+NA | 6      | 0.6185  | 0.15001   | 0.312     | 0.925     |
| 5nM+NA  | 6      | 0.3443  | 0.15001   | 0.038     | 0.651     |
| +NA     | 6      | -1.0774 | 0.15001   | -1.384    | -0.771    |

Std Error uses a pooled estimate of error variance

### Means Comparisons

#### Comparisons with a control using Dunnett's Method

### Oneway Analysis of allantoate By Label

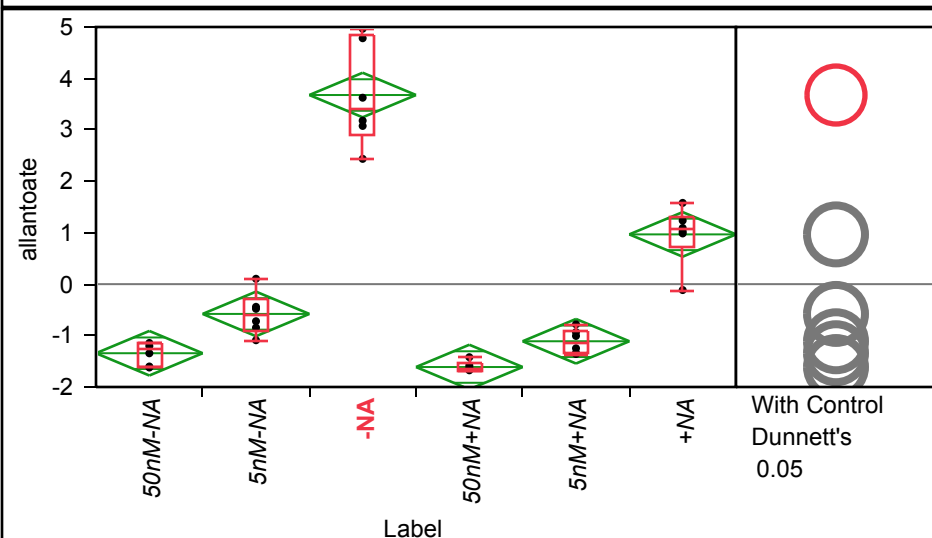

### Quantiles

| Level   | Minimum  | 10%      | 25%      | Median   | 75%      | 90%      | Maximum  |
|---------|----------|----------|----------|----------|----------|----------|----------|
| 50nM-NA | -1.62105 | -1.62105 | -1.6063  | -1.27481 | -1.14415 | -1.14384 | -1.14384 |
| 5nM-NA  | -1.09071 | -1.09071 | -0.90703 | -0.60074 | -0.30473 | 0.104393 | 0.104393 |
| -NA     | 2.435976 | 2.435976 | 2.916249 | 3.401909 | 4.827772 | 4.966276 | 4.966276 |
| 50nM+NA | -1.68277 | -1.68277 | -1.67968 | -1.65289 | -1.54181 | -1.42074 | -1.42074 |
| 5nM+NA  | -1.35893 | -1.35893 | -1.34158 | -1.12735 | -0.89532 | -0.78078 | -0.78078 |
| +NA     | -0.11506 | -0.11506 | 0.710763 | 1.058848 | 1.322054 | 1.579852 | 1.579852 |

### Oneway Anova

#### Summary of Fit

|                            |          |
|----------------------------|----------|
| Rsquare                    | 0.938038 |
| Adj Rsquare                | 0.927712 |
| Root Mean Square Error     | 0.519514 |
| Mean of Response           | 2.778e-9 |
| Observations (or Sum Wgts) | 36       |

#### Analysis of Variance

| Source   | DF | Sum of Squares | Mean Square | F Ratio | Prob > F |
|----------|----|----------------|-------------|---------|----------|
| Label    | 5  | 122.57833      | 24.5157     | 90.8342 | <.0001 * |
| Error    | 30 | 8.09684        | 0.2699      |         |          |
| C. Total | 35 | 130.67517      |             |         |          |

#### Means for Oneway Anova

| Level   | Number | Mean    | Std Error | Lower 95% | Upper 95% |
|---------|--------|---------|-----------|-----------|-----------|
| 50nM-NA | 6      | -1.3434 | 0.21209   | -1.777    | -0.910    |
| 5nM-NA  | 6      | -0.5791 | 0.21209   | -1.012    | -0.146    |
| -NA     | 6      | 3.6773  | 0.21209   | 3.244     | 4.110     |
| 50nM+NA | 6      | -1.6117 | 0.21209   | -2.045    | -1.179    |
| 5nM+NA  | 6      | -1.1106 | 0.21209   | -1.544    | -0.677    |
| +NA     | 6      | 0.9674  | 0.21209   | 0.534     | 1.401     |

Std Error uses a pooled estimate of error variance

### Means Comparisons

#### Comparisons with a control using Dunnett's Method

### Oneway Analysis of Amino adipic acid By Label

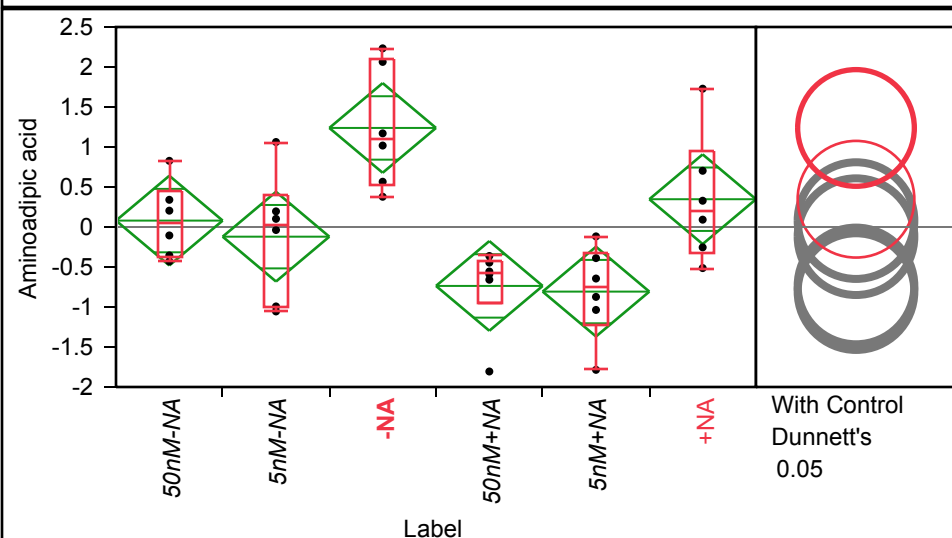

### Quantiles

| Level   | Minimum  | 10%      | 25%      | Median   | 75%      | 90%      | Maximum  |
|---------|----------|----------|----------|----------|----------|----------|----------|
| 50nM-NA | -0.42977 | -0.42977 | -0.37434 | 0.049233 | 0.461708 | 0.827022 | 0.827022 |
| 5nM-NA  | -1.05532 | -1.05532 | -1.00865 | 0.032324 | 0.412188 | 1.062405 | 1.062405 |
| -NA     | 0.378035 | 0.378035 | 0.518728 | 1.094183 | 2.106095 | 2.233133 | 2.233133 |
| 50nM+NA | -1.80618 | -1.80618 | -0.94577 | -0.57335 | -0.42474 | -0.36248 | -0.36248 |
| 5nM+NA  | -1.78542 | -1.78542 | -1.22372 | -0.75889 | -0.32101 | -0.11737 | -0.11737 |
| +NA     | -0.51359 | -0.51359 | -0.31947 | 0.209926 | 0.95923  | 1.728751 | 1.728751 |

### Oneway Anova

#### Summary of Fit

|                            |          |
|----------------------------|----------|
| Rsquare                    | 0.559469 |
| Adj Rsquare                | 0.486047 |
| Root Mean Square Error     | 0.672233 |
| Mean of Response           | -1.2e-17 |
| Observations (or Sum Wgts) | 36       |

#### Analysis of Variance

| Source   | DF | Sum of Squares | Mean Square | F Ratio | Prob > F |
|----------|----|----------------|-------------|---------|----------|
| Label    | 5  | 17.217106      | 3.44342     | 7.6199  | 0.0001 * |
| Error    | 30 | 13.556906      | 0.45190     |         |          |
| C. Total | 35 | 30.774012      |             |         |          |

#### Means for Oneway Anova

| Level   | Number | Mean    | Std Error | Lower 95% | Upper 95% |
|---------|--------|---------|-----------|-----------|-----------|
| 50nM-NA | 6      | 0.0800  | 0.27444   | -0.481    | 0.640     |
| 5nM-NA  | 6      | -0.1210 | 0.27444   | -0.681    | 0.439     |
| -NA     | 6      | 1.2382  | 0.27444   | 0.678     | 1.799     |
| 50nM+NA | 6      | -0.7366 | 0.27444   | -1.297    | -0.176    |
| 5nM+NA  | 6      | -0.8077 | 0.27444   | -1.368    | -0.247    |
| +NA     | 6      | 0.3472  | 0.27444   | -0.213    | 0.908     |

Std Error uses a pooled estimate of error variance

### Means Comparisons

#### Comparisons with a control using Dunnett's Method

### Oneway Analysis of AICAR(ZMP) By Label

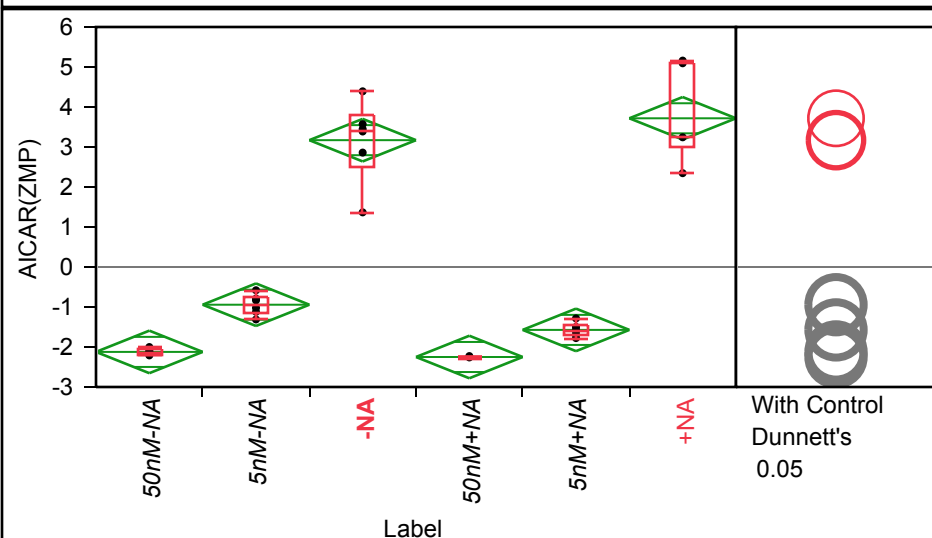

### Quantiles

| Level   | Minimum  | 10%      | 25%      | Median   | 75%      | 90%      | Maximum  |
|---------|----------|----------|----------|----------|----------|----------|----------|
| 50nM-NA | -2.21009 | -2.21009 | -2.17723 | -2.13695 | -2.0644  | -2.00136 | -2.00136 |
| 5nM-NA  | -1.31157 | -1.31157 | -1.16844 | -0.92642 | -0.7383  | -0.5817  | -0.5817  |
| -NA     | 1.365982 | 1.365982 | 2.486574 | 3.418112 | 3.776089 | 4.391648 | 4.391648 |
| 50nM+NA | -2.28559 | -2.28559 | -2.26686 | -2.24432 | -2.23536 | -2.22713 | -2.22713 |
| 5nM+NA  | -1.77715 | -1.77715 | -1.71496 | -1.59015 | -1.4452  | -1.28532 | -1.28532 |
| +NA     | 2.345733 | 2.345733 | 3.005039 | 3.240868 | 5.109774 | 5.159685 | 5.159685 |

### Oneway Anova

#### Summary of Fit

|                            |          |
|----------------------------|----------|
| Rsquare                    | 0.947673 |
| Adj Rsquare                | 0.938952 |
| Root Mean Square Error     | 0.637532 |
| Mean of Response           | 0        |
| Observations (or Sum Wgts) | 36       |

#### Analysis of Variance

| Source   | DF | Sum of Squares | Mean Square | F Ratio  | Prob > F |
|----------|----|----------------|-------------|----------|----------|
| Label    | 5  | 220.83024      | 44.1660     | 108.6638 | <.0001 * |
| Error    | 30 | 12.19341       | 0.4064      |          |          |
| C. Total | 35 | 233.02365      |             |          |          |

#### Means for Oneway Anova

| Level   | Number | Mean    | Std Error | Lower 95% | Upper 95% |
|---------|--------|---------|-----------|-----------|-----------|
| 50nM-NA | 6      | -2.1228 | 0.26027   | -2.654    | -1.591    |
| 5nM-NA  | 6      | -0.9429 | 0.26027   | -1.474    | -0.411    |
| -NA     | 6      | 3.1708  | 0.26027   | 2.639     | 3.702     |
| 50nM+NA | 6      | -2.2500 | 0.26027   | -2.782    | -1.718    |
| 5nM+NA  | 6      | -1.5726 | 0.26027   | -2.104    | -1.041    |
| +NA     | 6      | 3.7175  | 0.26027   | 3.186     | 4.249     |

Std Error uses a pooled estimate of error variance

### Means Comparisons

#### Comparisons with a control using Dunnett's Method

### Oneway Analysis of Aminomalonic acid By Label

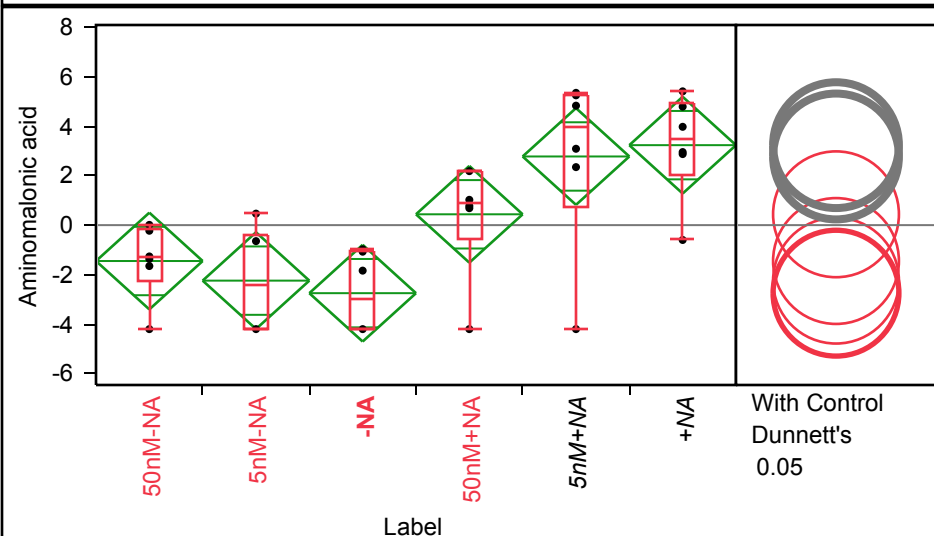

### Quantiles

| Level   | Minimum  | 10%      | 25%      | Median   | 75%      | 90%      | Maximum  |
|---------|----------|----------|----------|----------|----------|----------|----------|
| 50nM-NA | -4.19776 | -4.19776 | -2.28802 | -1.31305 | -0.16776 | 0.009186 | 0.009186 |
| 5nM-NA  | -4.19774 | -4.19774 | -4.19772 | -2.43214 | -0.36874 | 0.463641 | 0.463641 |
| -NA     | -4.19776 | -4.19776 | -4.19775 | -3.01733 | -1.04862 | -0.97768 | -0.97768 |
| 50nM+NA | -4.19778 | -4.19778 | -0.53658 | 0.897304 | 2.166758 | 2.17914  | 2.17914  |
| 5nM+NA  | -4.19773 | -4.19773 | 0.706493 | 3.951793 | 5.264413 | 5.339218 | 5.339218 |
| +NA     | -0.59964 | -0.59964 | 2.000886 | 3.458402 | 4.936844 | 5.399555 | 5.399555 |

### Oneway Anova

#### Summary of Fit

|                            |          |
|----------------------------|----------|
| Rsquare                    | 0.545919 |
| Adj Rsquare                | 0.470239 |
| Root Mean Square Error     | 2.341266 |
| Mean of Response           | -9.9e-17 |
| Observations (or Sum Wgts) | 36       |

#### Analysis of Variance

| Source   | DF | Sum of Squares | Mean Square | F Ratio | Prob > F |
|----------|----|----------------|-------------|---------|----------|
| Label    | 5  | 197.70527      | 39.5411     | 7.2135  | 0.0002 * |
| Error    | 30 | 164.44580      | 5.4815      |         |          |
| C. Total | 35 | 362.15108      |             |         |          |

#### Means for Oneway Anova

| Level   | Number | Mean    | Std Error | Lower 95% | Upper 95% |
|---------|--------|---------|-----------|-----------|-----------|
| 50nM-NA | 6      | -1.4488 | 0.95582   | -3.401    | 0.503     |
| 5nM-NA  | 6      | -2.2404 | 0.95582   | -4.192    | -0.288    |
| -NA     | 6      | -2.7467 | 0.95582   | -4.699    | -0.795    |
| 50nM+NA | 6      | 0.4371  | 0.95582   | -1.515    | 2.389     |
| 5nM+NA  | 6      | 2.7710  | 0.95582   | 0.819     | 4.723     |
| +NA     | 6      | 3.2278  | 0.95582   | 1.276     | 5.180     |

Std Error uses a pooled estimate of error variance

### Means Comparisons

#### Comparisons with a control using Dunnett's Method

### Oneway Analysis of AMP By Label

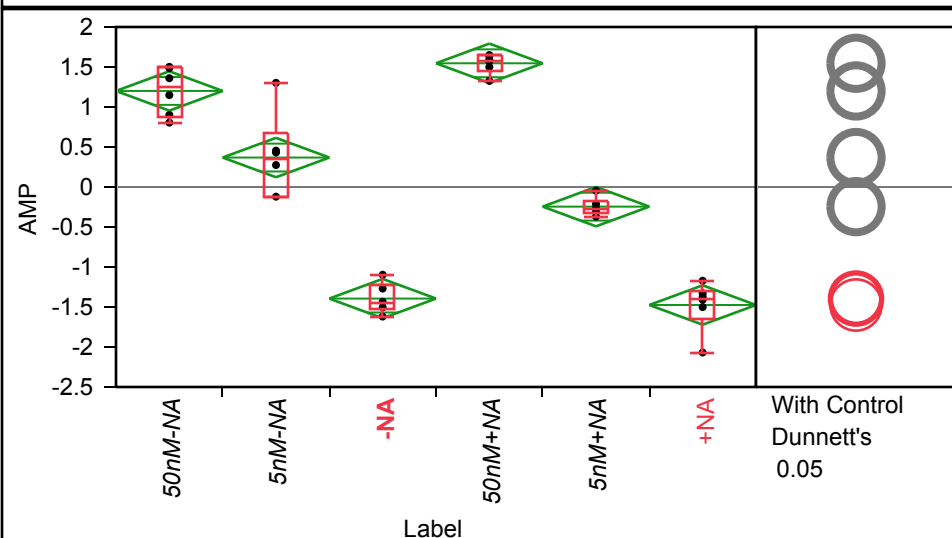

### Quantiles

| Level   | Minimum  | 10%      | 25%      | Median   | 75%      | 90%      | Maximum  |
|---------|----------|----------|----------|----------|----------|----------|----------|
| 50nM-NA | 0.804621 | 0.804621 | 0.876673 | 1.254101 | 1.491079 | 1.501597 | 1.501597 |
| 5nM-NA  | -0.1326  | -0.1326  | -0.12391 | 0.352823 | 0.666539 | 1.302244 | 1.302244 |
| -NA     | -1.61949 | -1.61949 | -1.53277 | -1.43933 | -1.22608 | -1.09688 | -1.09688 |
| 50nM+NA | 1.326028 | 1.326028 | 1.456487 | 1.583835 | 1.638922 | 1.64954  | 1.64954  |
| 5nM+NA  | -0.36915 | -0.36915 | -0.32466 | -0.26682 | -0.17193 | -0.04523 | -0.04523 |
| +NA     | -2.06874 | -2.06874 | -1.64315 | -1.39006 | -1.28919 | -1.17163 | -1.17163 |

### Oneway Anova

#### Summary of Fit

|                            |          |
|----------------------------|----------|
| Rsquare                    | 0.949196 |
| Adj Rsquare                | 0.940728 |
| Root Mean Square Error     | 0.295353 |
| Mean of Response           | 2.78e-10 |
| Observations (or Sum Wgts) | 36       |

#### Analysis of Variance

| Source   | DF | Sum of Squares | Mean Square | F Ratio  | Prob > F |
|----------|----|----------------|-------------|----------|----------|
| Label    | 5  | 48.894370      | 9.77887     | 112.1002 | <.0001 * |
| Error    | 30 | 2.617000       | 0.08723     |          |          |
| C. Total | 35 | 51.511370      |             |          |          |

#### Means for Oneway Anova

| Level   | Number | Mean    | Std Error | Lower 95% | Upper 95% |
|---------|--------|---------|-----------|-----------|-----------|
| 50nM-NA | 6      | 1.2004  | 0.12058   | 0.954     | 1.447     |
| 5nM-NA  | 6      | 0.3682  | 0.12058   | 0.122     | 0.614     |
| -NA     | 6      | -1.3947 | 0.12058   | -1.641    | -1.148    |
| 50nM+NA | 6      | 1.5464  | 0.12058   | 1.300     | 1.793     |
| 5nM+NA  | 6      | -0.2453 | 0.12058   | -0.492    | 0.00092   |
| +NA     | 6      | -1.4750 | 0.12058   | -1.721    | -1.229    |

Std Error uses a pooled estimate of error variance

### Means Comparisons

#### Comparisons with a control using Dunnett's Method

### Oneway Analysis of Anhydrosorbitol By Label

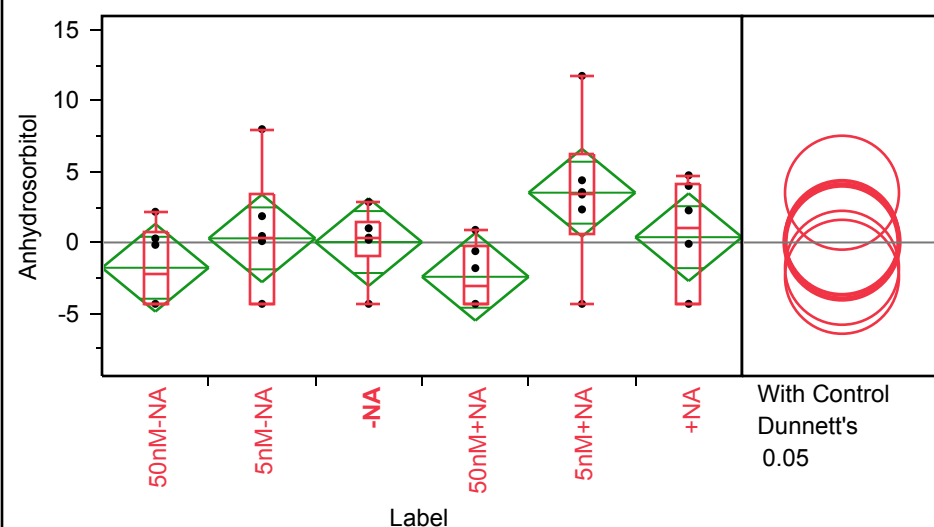

### Quantiles

| Level   | Minimum  | 10%      | 25%      | Median   | 75%      | 90%      | Maximum  |
|---------|----------|----------|----------|----------|----------|----------|----------|
| 50nM-NA | -4.33587 | -4.33587 | -4.33586 | -2.25187 | 0.755378 | 2.169058 | 2.169058 |
| 5nM-NA  | -4.33585 | -4.33585 | -4.33582 | 0.275899 | 3.395682 | 8.005105 | 8.005105 |
| -NA     | -4.33581 | -4.33581 | -0.99241 | 0.265467 | 1.467042 | 2.852432 | 2.852432 |
| 50nM+NA | -4.33588 | -4.33588 | -4.33587 | -3.07429 | -0.23685 | 0.890167 | 0.890167 |
| 5nM+NA  | -4.33584 | -4.33584 | 0.665653 | 3.473047 | 6.237559 | 11.76941 | 11.76941 |
| +NA     | -4.33586 | -4.33586 | -4.33585 | 1.085018 | 4.182573 | 4.746672 | 4.746672 |

### Oneway Anova

#### Summary of Fit

|                            |          |
|----------------------------|----------|
| Rsquare                    | 0.239429 |
| Adj Rsquare                | 0.112667 |
| Root Mean Square Error     | 3.710194 |
| Mean of Response           | 2.78e-10 |
| Observations (or Sum Wgts) | 36       |

#### Analysis of Variance

| Source   | DF | Sum of Squares | Mean Square | F Ratio | Prob > F |
|----------|----|----------------|-------------|---------|----------|
| Label    | 5  | 130.00210      | 26.0004     | 1.8888  | 0.1259   |
| Error    | 30 | 412.96617      | 13.7655     |         |          |
| C. Total | 35 | 542.96827      |             |         |          |

#### Means for Oneway Anova

| Level   | Number | Mean    | Std Error | Lower 95% | Upper 95% |
|---------|--------|---------|-----------|-----------|-----------|
| 50nM-NA | 6      | -1.7870 | 1.5147    | -4.880    | 1.3063    |
| 5nM-NA  | 6      | 0.2907  | 1.5147    | -2.803    | 3.3841    |
| -NA     | 6      | 0.0291  | 1.5147    | -3.064    | 3.1225    |
| 50nM+NA | 6      | -2.4238 | 1.5147    | -5.517    | 0.6696    |
| 5nM+NA  | 6      | 3.5177  | 1.5147    | 0.424     | 6.6111    |
| +NA     | 6      | 0.3733  | 1.5147    | -2.720    | 3.4666    |

Std Error uses a pooled estimate of error variance

### Means Comparisons

#### Comparisons with a control using Dunnett's Method

### Oneway Analysis of Arabitol By Label

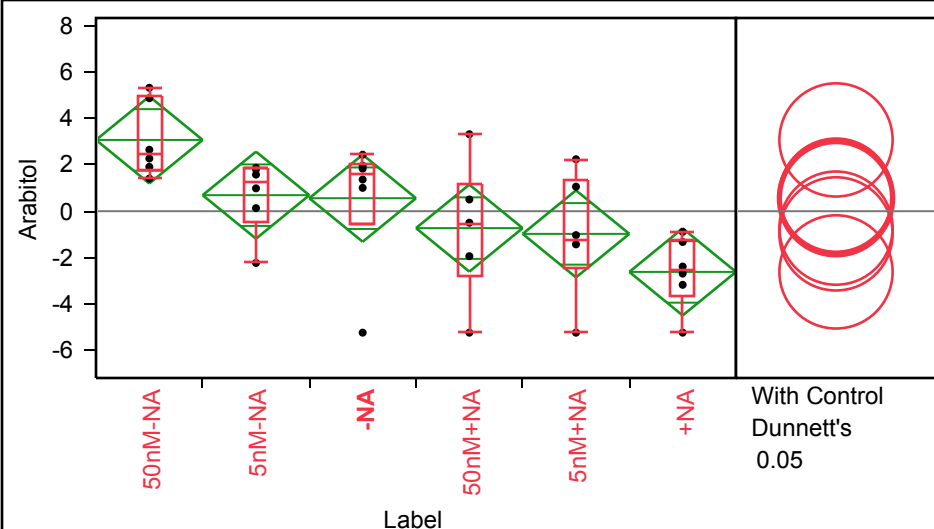

### Quantiles

| Level   | Minimum  | 10%      | 25%      | Median   | 75%      | 90%      | Maximum  |
|---------|----------|----------|----------|----------|----------|----------|----------|
| 50nM-NA | 1.407161 | 1.407161 | 1.787215 | 2.462121 | 4.986505 | 5.323787 | 5.323787 |
| 5nM-NA  | -2.23137 | -2.23137 | -0.45838 | 1.282188 | 1.825411 | 1.873102 | 1.873102 |
| -NA     | -5.23865 | -5.23865 | -0.55434 | 1.600656 | 2.078054 | 2.436184 | 2.436184 |
| 50nM+NA | -5.23871 | -5.23871 | -2.765   | -0.51236 | 1.208945 | 3.320171 | 3.320171 |
| 5nM+NA  | -5.23871 | -5.23871 | -2.40867 | -1.23112 | 1.354142 | 2.240349 | 2.240349 |
| +NA     | -5.23868 | -5.23868 | -3.69081 | -2.53975 | -1.21744 | -0.89108 | -0.89108 |

### Oneway Anova

#### Summary of Fit

|                            |          |
|----------------------------|----------|
| Rsquare                    | 0.423172 |
| Adj Rsquare                | 0.327034 |
| Root Mean Square Error     | 2.250972 |
| Mean of Response           | 1.48e-16 |
| Observations (or Sum Wgts) | 36       |

#### Analysis of Variance

| Source   | DF | Sum of Squares | Mean Square | F Ratio | Prob > F |
|----------|----|----------------|-------------|---------|----------|
| Label    | 5  | 111.51479      | 22.3030     | 4.4017  | 0.0040 * |
| Error    | 30 | 152.00619      | 5.0669      |         |          |
| C. Total | 35 | 263.52099      |             |         |          |

#### Means for Oneway Anova

| Level   | Number | Mean    | Std Error | Lower 95% | Upper 95% |
|---------|--------|---------|-----------|-----------|-----------|
| 50nM-NA | 6      | 3.0739  | 0.91896   | 1.197     | 4.951     |
| 5nM-NA  | 6      | 0.6914  | 0.91896   | -1.185    | 2.568     |
| -NA     | 6      | 0.5608  | 0.91896   | -1.316    | 2.438     |
| 50nM+NA | 6      | -0.7297 | 0.91896   | -2.607    | 1.147     |
| 5nM+NA  | 6      | -0.9779 | 0.91896   | -2.855    | 0.899     |
| +NA     | 6      | -2.6184 | 0.91896   | -4.495    | -0.742    |

Std Error uses a pooled estimate of error variance

### Means Comparisons

#### Comparisons with a control using Dunnett's Method

### Oneway Analysis of Arginine By Label

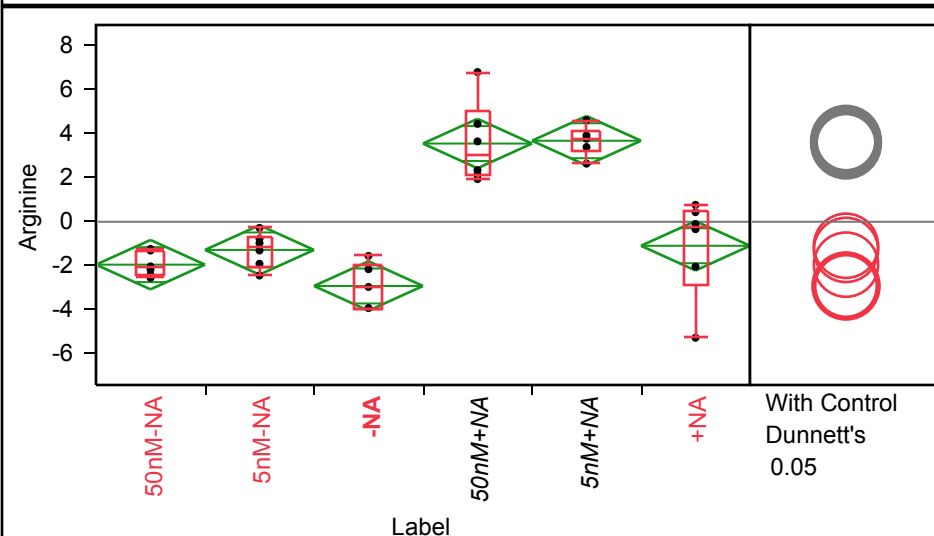

### Quantiles

| Level   | Minimum  | 10%      | 25%      | Median   | 75%      | 90%      | Maximum  |
|---------|----------|----------|----------|----------|----------|----------|----------|
| 50nM-NA | -2.54322 | -2.54322 | -2.44105 | -2.09381 | -1.28902 | -1.23618 | -1.23618 |
| 5nM-NA  | -2.43894 | -2.43894 | -2.03919 | -1.13636 | -0.64932 | -0.28214 | -0.28214 |
| -NA     | -3.95092 | -3.95092 | -3.92502 | -2.96027 | -2.0024  | -1.55037 | -1.55037 |
| 50nM+NA | 1.937607 | 1.937607 | 2.08705  | 2.996594 | 5.032613 | 6.797178 | 6.797178 |
| 5nM+NA  | 2.638329 | 2.638329 | 3.203396 | 3.756947 | 4.092146 | 4.610685 | 4.610685 |
| +NA     | -5.26524 | -5.26524 | -2.84421 | -0.22081 | 0.519817 | 0.766728 | 0.766728 |

### Oneway Anova

#### Summary of Fit

|                            |          |
|----------------------------|----------|
| Rsquare                    | 0.820106 |
| Adj Rsquare                | 0.790124 |
| Root Mean Square Error     | 1.345398 |
| Mean of Response           | -5.56e-9 |
| Observations (or Sum Wgts) | 36       |

#### Analysis of Variance

| Source   | DF | Sum of Squares | Mean Square | F Ratio | Prob > F |
|----------|----|----------------|-------------|---------|----------|
| Label    | 5  | 247.55795      | 49.5116     | 27.3530 | <.0001 * |
| Error    | 30 | 54.30288       | 1.8101      |         |          |
| C. Total | 35 | 301.86082      |             |         |          |

#### Means for Oneway Anova

| Level   | Number | Mean    | Std Error | Lower 95% | Upper 95% |
|---------|--------|---------|-----------|-----------|-----------|
| 50nM-NA | 6      | -1.9468 | 0.54926   | -3.069    | -0.825    |
| 5nM-NA  | 6      | -1.2786 | 0.54926   | -2.400    | -0.157    |
| -NA     | 6      | -2.9152 | 0.54926   | -4.037    | -1.793    |
| 50nM+NA | 6      | 3.5515  | 0.54926   | 2.430     | 4.673     |
| 5nM+NA  | 6      | 3.6790  | 0.54926   | 2.557     | 4.801     |
| +NA     | 6      | -1.0900 | 0.54926   | -2.212    | 0.032     |

Std Error uses a pooled estimate of error variance

### Means Comparisons

#### Comparisons with a control using Dunnett's Method

### Oneway Analysis of Asparagine By Label

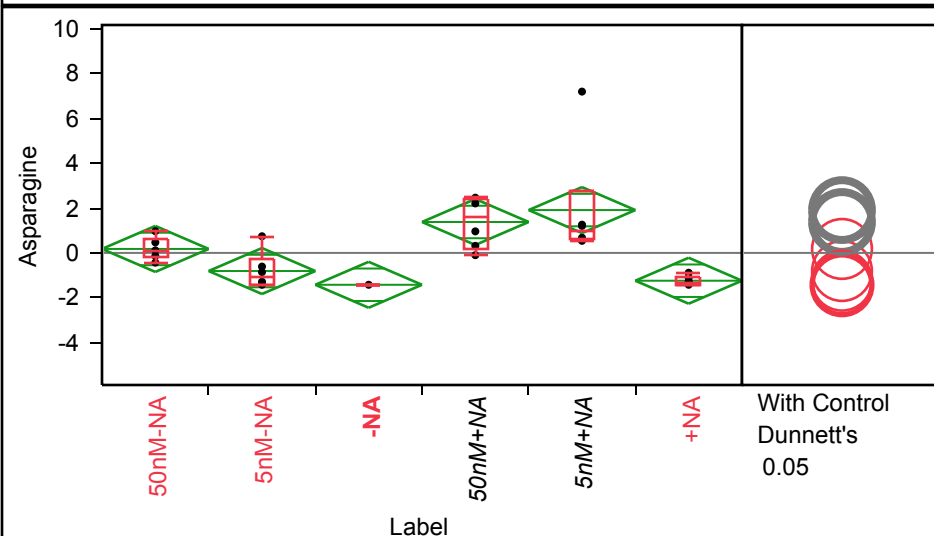

### Quantiles

| Level   | Minimum  | 10%      | 25%      | Median   | 75%      | 90%      | Maximum  |
|---------|----------|----------|----------|----------|----------|----------|----------|
| 50nM-NA | -0.43287 | -0.43287 | -0.20856 | 0.095661 | 0.595477 | 0.970184 | 0.970184 |
| 5nM-NA  | -1.42114 | -1.42114 | -1.42112 | -1.06922 | -0.2715  | 0.743378 | 0.743378 |
| -NA     | -1.42123 | -1.42123 | -1.42121 | -1.42118 | -1.42116 | -1.42112 | -1.42112 |
| 50nM+NA | -0.1003  | -0.1003  | 0.210756 | 1.58487  | 2.440553 | 2.46399  | 2.46399  |
| 5nM+NA  | 0.539904 | 0.539904 | 0.578426 | 0.940581 | 2.744446 | 7.197166 | 7.197166 |
| +NA     | -1.42121 | -1.42121 | -1.42121 | -1.30263 | -1.05334 | -0.88415 | -0.88415 |

### Oneway Anova

#### Summary of Fit

|                            |          |
|----------------------------|----------|
| Rsquare                    | 0.564729 |
| Adj Rsquare                | 0.492184 |
| Root Mean Square Error     | 1.229172 |
| Mean of Response           | 2.78e-10 |
| Observations (or Sum Wgts) | 36       |

#### Analysis of Variance

| Source   | DF | Sum of Squares | Mean Square | F Ratio | Prob > F |
|----------|----|----------------|-------------|---------|----------|
| Label    | 5  | 58.80667       | 11.7613     | 7.7845  | <.0001 * |
| Error    | 30 | 45.32593       | 1.5109      |         |          |
| C. Total | 35 | 104.13260      |             |         |          |

#### Means for Oneway Anova

| Level   | Number | Mean    | Std Error | Lower 95% | Upper 95% |
|---------|--------|---------|-----------|-----------|-----------|
| 50nM-NA | 6      | 0.1776  | 0.50181   | -0.847    | 1.202     |
| 5nM-NA  | 6      | -0.8079 | 0.50181   | -1.833    | 0.217     |
| -NA     | 6      | -1.4212 | 0.50181   | -2.446    | -0.396    |
| 50nM+NA | 6      | 1.3801  | 0.50181   | 0.355     | 2.405     |
| 5nM+NA  | 6      | 1.9116  | 0.50181   | 0.887     | 2.936     |
| +NA     | 6      | -1.2403 | 0.50181   | -2.265    | -0.215    |

Std Error uses a pooled estimate of error variance

### Means Comparisons

#### Comparisons with a control using Dunnett's Method

### Oneway Analysis of aspartate By Label

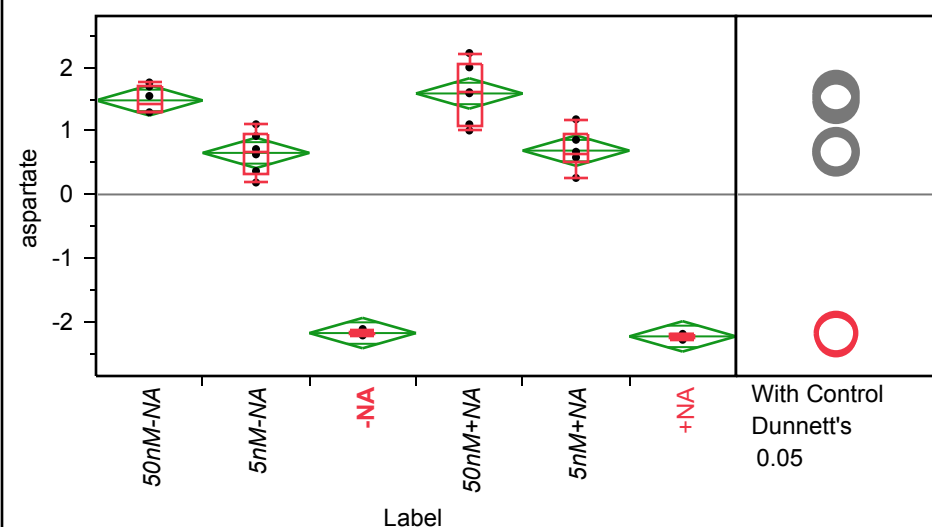

### Quantiles

| Level   | Minimum  | 10%      | 25%      | Median   | 75%      | 90%      | Maximum  |
|---------|----------|----------|----------|----------|----------|----------|----------|
| 50nM-NA | 1.285323 | 1.285323 | 1.290129 | 1.419915 | 1.713264 | 1.76084  | 1.76084  |
| 5nM-NA  | 0.187828 | 0.187828 | 0.322628 | 0.671903 | 0.964545 | 1.103681 | 1.103681 |
| -NA     | -2.2161  | -2.2161  | -2.20729 | -2.187   | -2.15139 | -2.11562 | -2.11562 |
| 50nM+NA | 1.005036 | 1.005036 | 1.078297 | 1.59886  | 2.054409 | 2.223257 | 2.223257 |
| 5nM+NA  | 0.259766 | 0.259766 | 0.500775 | 0.627468 | 0.940011 | 1.181576 | 1.181576 |
| +NA     | -2.28442 | -2.28442 | -2.25035 | -2.23668 | -2.19651 | -2.19161 | -2.19161 |

### Oneway Anova

#### Summary of Fit

|                            |          |
|----------------------------|----------|
| Rsquare                    | 0.974029 |
| Adj Rsquare                | 0.969701 |
| Root Mean Square Error     | 0.285984 |
| Mean of Response           | -1.11e-8 |
| Observations (or Sum Wgts) | 36       |

#### Analysis of Variance

| Source   | DF | Sum of Squares | Mean Square | F Ratio  | Prob > F |
|----------|----|----------------|-------------|----------|----------|
| Label    | 5  | 92.021599      | 18.4043     | 225.0277 | <.0001 * |
| Error    | 30 | 2.453607       | 0.0818      |          |          |
| C. Total | 35 | 94.475207      |             |          |          |

#### Means for Oneway Anova

| Level   | Number | Mean    | Std Error | Lower 95% | Upper 95% |
|---------|--------|---------|-----------|-----------|-----------|
| 50nM-NA | 6      | 1.4792  | 0.11675   | 1.241     | 1.718     |
| 5nM-NA  | 6      | 0.6535  | 0.11675   | 0.415     | 0.892     |
| -NA     | 6      | -2.1789 | 0.11675   | -2.417    | -1.940    |
| 50nM+NA | 6      | 1.5878  | 0.11675   | 1.349     | 1.826     |
| 5nM+NA  | 6      | 0.6895  | 0.11675   | 0.451     | 0.928     |
| +NA     | 6      | -2.2311 | 0.11675   | -2.470    | -1.993    |

Std Error uses a pooled estimate of error variance

### Means Comparisons

#### Comparisons with a control using Dunnett's Method

### Oneway Analysis of ATP By Label

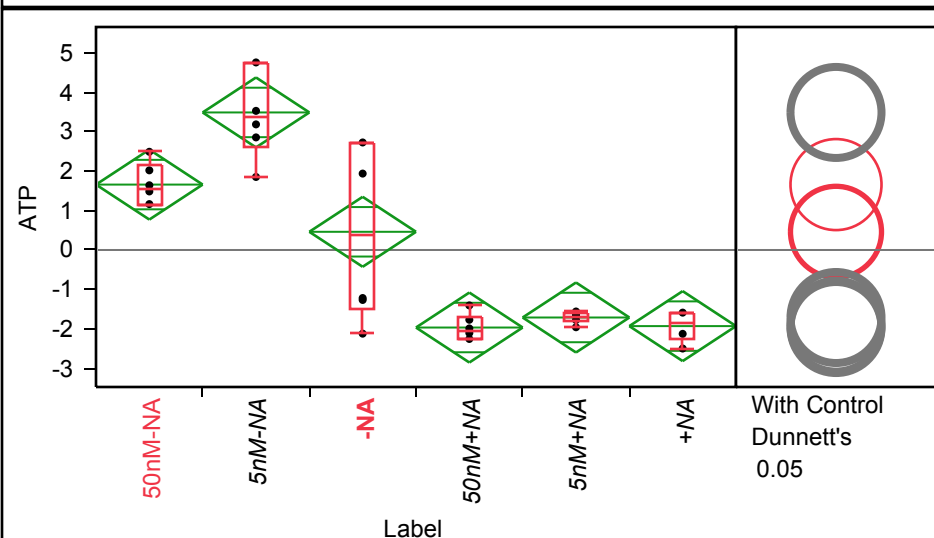

### Quantiles

| Level   | Minimum  | 10%      | 25%      | Median   | 75%      | 90%      | Maximum  |
|---------|----------|----------|----------|----------|----------|----------|----------|
| 50nM-NA | 1.154482 | 1.154482 | 1.163262 | 1.5663   | 2.141964 | 2.495491 | 2.495491 |
| 5nM-NA  | 1.855749 | 1.855749 | 2.609769 | 3.363714 | 4.762448 | 4.766207 | 4.766207 |
| -NA     | -2.12583 | -2.12583 | -1.48382 | 0.360479 | 2.720274 | 2.732486 | 2.732486 |
| 50nM+NA | -2.27653 | -2.27653 | -2.26473 | -2.05142 | -1.68195 | -1.40857 | -1.40857 |
| 5nM+NA  | -1.96269 | -1.96269 | -1.8245  | -1.67954 | -1.61253 | -1.56314 | -1.56314 |
| +NA     | -2.50367 | -2.50367 | -2.23709 | -1.87298 | -1.60912 | -1.59158 | -1.59158 |

### Oneway Anova

#### Summary of Fit

|                            |          |
|----------------------------|----------|
| Rsquare                    | 0.819263 |
| Adj Rsquare                | 0.78914  |
| Root Mean Square Error     | 1.066078 |
| Mean of Response           | 0        |
| Observations (or Sum Wgts) | 36       |

#### Analysis of Variance

| Source   | DF | Sum of Squares | Mean Square | F Ratio | Prob > F |
|----------|----|----------------|-------------|---------|----------|
| Label    | 5  | 154.55253      | 30.9105     | 27.1974 | <.0001 * |
| Error    | 30 | 34.09568       | 1.1365      |         |          |
| C. Total | 35 | 188.64822      |             |         |          |

#### Means for Oneway Anova

| Level   | Number | Mean    | Std Error | Lower 95% | Upper 95% |
|---------|--------|---------|-----------|-----------|-----------|
| 50nM-NA | 6      | 1.6621  | 0.43522   | 0.773     | 2.551     |
| 5nM-NA  | 6      | 3.4953  | 0.43522   | 2.606     | 4.384     |
| -NA     | 6      | 0.4623  | 0.43522   | -0.427    | 1.351     |
| 50nM+NA | 6      | -1.9703 | 0.43522   | -2.859    | -1.081    |
| 5nM+NA  | 6      | -1.7154 | 0.43522   | -2.604    | -0.827    |
| +NA     | 6      | -1.9341 | 0.43522   | -2.823    | -1.045    |

Std Error uses a pooled estimate of error variance

### Means Comparisons

#### Comparisons with a control using Dunnett's Method

### Oneway Analysis of Atrolactic acid By Label

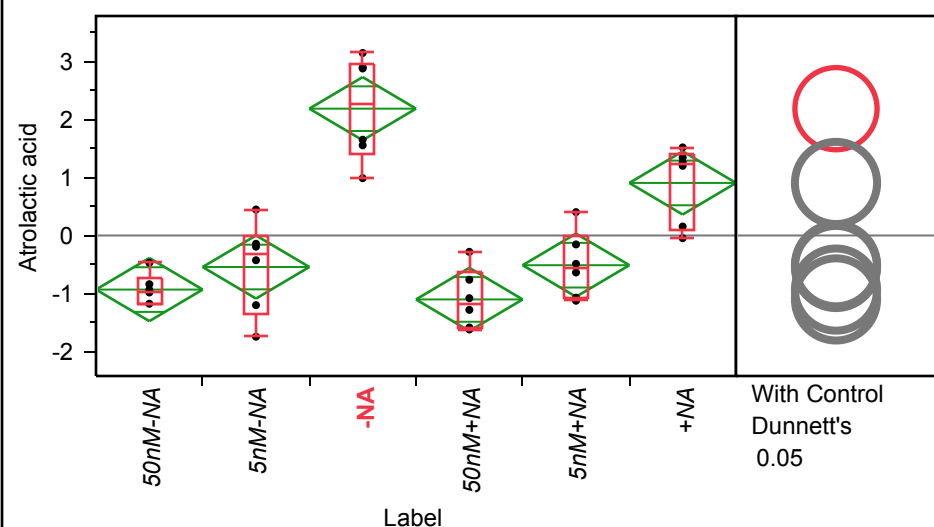

### Quantiles

| Level   | Minimum  | 10%      | 25%      | Median   | 75%      | 90%      | Maximum  |
|---------|----------|----------|----------|----------|----------|----------|----------|
| 50nM-NA | -1.18652 | -1.18652 | -1.17713 | -0.95729 | -0.74618 | -0.47038 | -0.47038 |
| 5nM-NA  | -1.74081 | -1.74081 | -1.33396 | -0.30921 | 0.004143 | 0.446285 | 0.446285 |
| -NA     | 0.985637 | 0.985637 | 1.40941  | 2.25961  | 2.954186 | 3.138685 | 3.138685 |
| 50nM+NA | -1.61707 | -1.61707 | -1.59127 | -1.17923 | -0.64125 | -0.28161 | -0.28161 |
| 5nM+NA  | -1.12259 | -1.12259 | -1.08278 | -0.56219 | -0.01518 | 0.401655 | 0.401655 |
| +NA     | -0.04666 | -0.04666 | 0.103367 | 1.228888 | 1.384978 | 1.514965 | 1.514965 |

### Oneway Anova

#### Summary of Fit

|                            |          |
|----------------------------|----------|
| Rsquare                    | 0.794624 |
| Adj Rsquare                | 0.760395 |
| Root Mean Square Error     | 0.651289 |
| Mean of Response           | -4.9e-17 |
| Observations (or Sum Wgts) | 36       |

#### Analysis of Variance

| Source   | DF | Sum of Squares | Mean Square | F Ratio | Prob > F |
|----------|----|----------------|-------------|---------|----------|
| Label    | 5  | 49.235756      | 9.84715     | 23.2147 | <.0001 * |
| Error    | 30 | 12.725312      | 0.42418     |         |          |
| C. Total | 35 | 61.961068      |             |         |          |

#### Means for Oneway Anova

| Level   | Number | Mean    | Std Error | Lower 95% | Upper 95% |
|---------|--------|---------|-----------|-----------|-----------|
| 50nM-NA | 6      | -0.9306 | 0.26589   | -1.474    | -0.388    |
| 5nM-NA  | 6      | -0.5424 | 0.26589   | -1.085    | 0.00059   |
| -NA     | 6      | 2.1811  | 0.26589   | 1.638     | 2.724     |
| 50nM+NA | 6      | -1.1002 | 0.26589   | -1.643    | -0.557    |
| 5nM+NA  | 6      | -0.5115 | 0.26589   | -1.055    | 0.032     |
| +NA     | 6      | 0.9035  | 0.26589   | 0.361     | 1.447     |

Std Error uses a pooled estimate of error variance

### Means Comparisons

#### Comparisons with a control using Dunnett's Method

### Oneway Analysis of Benzoic acid By Label

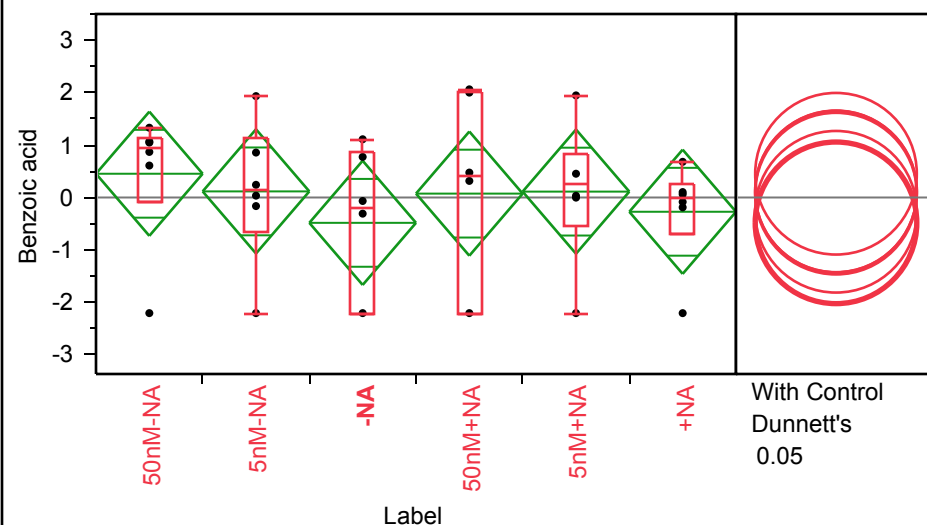

### Quantiles

| Level   | Minimum  | 10%      | 25%      | Median   | 75%      | 90%      | Maximum  |
|---------|----------|----------|----------|----------|----------|----------|----------|
| 50nM-NA | -2.20544 | -2.20544 | -0.0943  | 0.957931 | 1.133159 | 1.330905 | 1.330905 |
| 5nM-NA  | -2.20539 | -2.20539 | -0.67405 | 0.138344 | 1.126117 | 1.933419 | 1.933419 |
| -NA     | -2.20539 | -2.20539 | -2.20537 | -0.18736 | 0.85827  | 1.110674 | 1.110674 |
| 50nM+NA | -2.20549 | -2.20549 | -2.20547 | 0.395846 | 2.016248 | 2.062659 | 2.062659 |
| 5nM+NA  | -2.20543 | -2.20543 | -0.55311 | 0.240249 | 0.826788 | 1.94723  | 1.94723  |
| +NA     | -2.20592 | -2.20592 | -0.69252 | -0.01132 | 0.247583 | 0.680437 | 0.680437 |

### Oneway Anova

#### Summary of Fit

|                            |          |
|----------------------------|----------|
| Rsquare                    | 0.051184 |
| Adj Rsquare                | -0.10695 |
| Root Mean Square Error     | 1.420943 |
| Mean of Response           | -5.6e-10 |
| Observations (or Sum Wgts) | 36       |

#### Analysis of Variance

| Source   | DF | Sum of Squares | Mean Square | F Ratio | Prob > F |
|----------|----|----------------|-------------|---------|----------|
| Label    | 5  | 3.267581       | 0.65352     | 0.3237  | 0.8947   |
| Error    | 30 | 60.572400      | 2.01908     |         |          |
| C. Total | 35 | 63.839981      |             |         |          |

#### Means for Oneway Anova

| Level   | Number | Mean     | Std Error | Lower 95% | Upper 95% |
|---------|--------|----------|-----------|-----------|-----------|
| 50nM-NA | 6      | 0.45300  | 0.58010   | -0.732    | 1.6377    |
| 5nM-NA  | 6      | 0.11635  | 0.58010   | -1.068    | 1.3011    |
| -NA     | 6      | -0.48344 | 0.58010   | -1.668    | 0.7013    |
| 50nM+NA | 6      | 0.07403  | 0.58010   | -1.111    | 1.2587    |
| 5nM+NA  | 6      | 0.11221  | 0.58010   | -1.073    | 1.2969    |
| +NA     | 6      | -0.27215 | 0.58010   | -1.457    | 0.9126    |

Std Error uses a pooled estimate of error variance

### Means Comparisons

#### Comparisons with a control using Dunnett's Method

### Oneway Analysis of beta-Alanine By Label

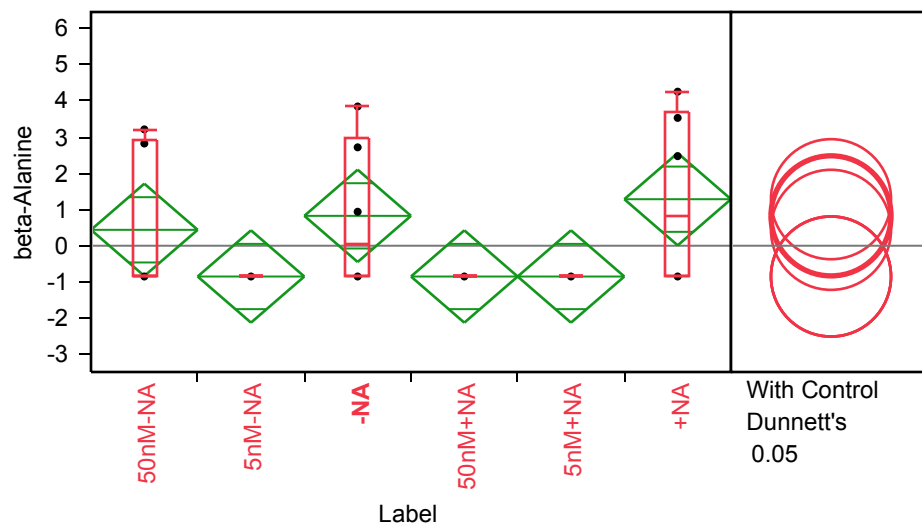

### Quantiles

| Level   | Minimum  | 10%      | 25%      | Median   | 75%      | 90%      | Maximum  |
|---------|----------|----------|----------|----------|----------|----------|----------|
| 50nM-NA | -0.84986 | -0.84986 | -0.84984 | -0.8498  | 2.919985 | 3.212418 | 3.212418 |
| 5nM-NA  | -0.84986 | -0.84986 | -0.8498  | -0.84974 | -0.8497  | -0.84968 | -0.84968 |
| -NA     | -0.84976 | -0.84976 | -0.84974 | 0.044461 | 2.999245 | 3.844765 | 3.844765 |
| 50nM+NA | -0.84986 | -0.84986 | -0.84984 | -0.84982 | -0.8498  | -0.8498  | -0.8498  |
| 5nM+NA  | -0.84988 | -0.84988 | -0.84987 | -0.84982 | -0.84977 | -0.84974 | -0.84974 |
| +NA     | -0.84978 | -0.84978 | -0.84978 | 0.811989 | 3.711258 | 4.254528 | 4.254528 |

### Oneway Anova

#### Summary of Fit

|                            |          |
|----------------------------|----------|
| Rsquare                    | 0.286534 |
| Adj Rsquare                | 0.167623 |
| Root Mean Square Error     | 1.528488 |
| Mean of Response           | -5.56e-9 |
| Observations (or Sum Wgts) | 36       |

#### Analysis of Variance

| Source   | DF | Sum of Squares | Mean Square | F Ratio | Prob > F |
|----------|----|----------------|-------------|---------|----------|
| Label    | 5  | 28.148008      | 5.62960     | 2.4096  | 0.0597   |
| Error    | 30 | 70.088245      | 2.33627     |         |          |
| C. Total | 35 | 98.236253      |             |         |          |

#### Means for Oneway Anova

| Level   | Number | Mean    | Std Error | Lower 95% | Upper 95% |
|---------|--------|---------|-----------|-----------|-----------|
| 50nM-NA | 6      | 0.4393  | 0.62400   | -0.835    | 1.7137    |
| 5nM-NA  | 6      | -0.8498 | 0.62400   | -2.124    | 0.4246    |
| -NA     | 6      | 0.8253  | 0.62400   | -0.449    | 2.0996    |
| 50nM+NA | 6      | -0.8498 | 0.62400   | -2.124    | 0.4246    |
| 5nM+NA  | 6      | -0.8498 | 0.62400   | -2.124    | 0.4246    |
| +NA     | 6      | 1.2849  | 0.62400   | 0.010     | 2.5592    |

Std Error uses a pooled estimate of error variance

### Means Comparisons

#### Comparisons with a control using Dunnett's Method

### Oneway Analysis of beta-D-Glucopyranose By Label

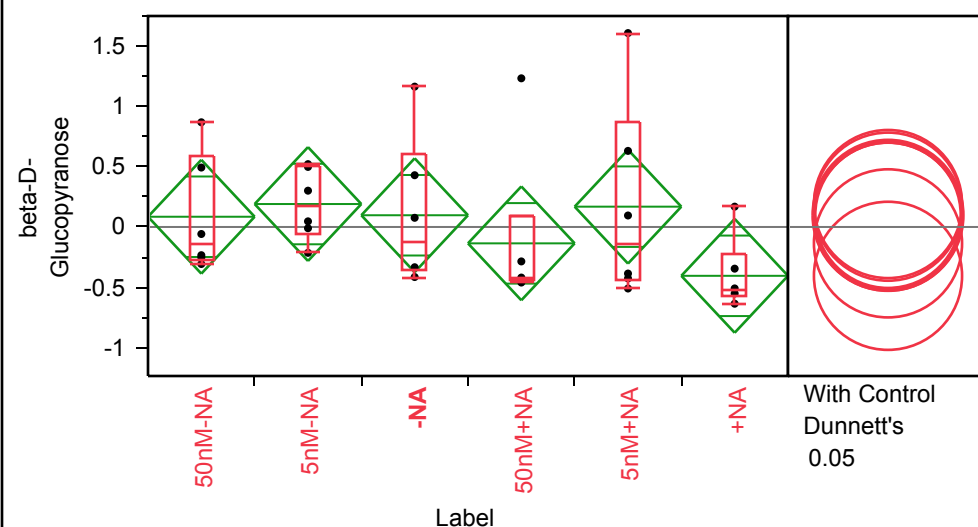

### Quantiles

| Level   | Minimum  | 10%      | 25%      | Median   | 75%      | 90%      | Maximum  |
|---------|----------|----------|----------|----------|----------|----------|----------|
| 50nM-NA | -0.30717 | -0.30717 | -0.26618 | -0.14616 | 0.586781 | 0.868374 | 0.868374 |
| 5nM-NA  | -0.21459 | -0.21459 | -0.06142 | 0.173874 | 0.503795 | 0.521092 | 0.521092 |
| -NA     | -0.41528 | -0.41528 | -0.35617 | -0.12896 | 0.612972 | 1.164071 | 1.164071 |
| 50nM+NA | -0.46091 | -0.46091 | -0.44624 | -0.43009 | 0.094005 | 1.233101 | 1.233101 |
| 5nM+NA  | -0.51042 | -0.51042 | -0.44773 | -0.1456  | 0.875364 | 1.608279 | 1.608279 |
| +NA     | -0.6365  | -0.6365  | -0.57586 | -0.53075 | -0.2171  | 0.168599 | 0.168599 |

### Oneway Anova

#### Summary of Fit

|                            |          |
|----------------------------|----------|
| Rsquare                    | 0.141275 |
| Adj Rsquare                | -0.00185 |
| Root Mean Square Error     | 0.566351 |
| Mean of Response           | 0        |
| Observations (or Sum Wgts) | 36       |

#### Analysis of Variance

| Source   | DF | Sum of Squares | Mean Square | F Ratio | Prob > F |
|----------|----|----------------|-------------|---------|----------|
| Label    | 5  | 1.583087       | 0.316617    | 0.9871  | 0.4420   |
| Error    | 30 | 9.622618       | 0.320754    |         |          |
| C. Total | 35 | 11.205705      |             |         |          |

#### Means for Oneway Anova

| Level   | Number | Mean     | Std Error | Lower 95% | Upper 95% |
|---------|--------|----------|-----------|-----------|-----------|
| 50nM-NA | 6      | 0.08488  | 0.23121   | -0.3873   | 0.55708   |
| 5nM-NA  | 6      | 0.19032  | 0.23121   | -0.2819   | 0.66252   |
| -NA     | 6      | 0.09728  | 0.23121   | -0.3749   | 0.56948   |
| 50nM+NA | 6      | -0.13584 | 0.23121   | -0.6080   | 0.33636   |
| 5nM+NA  | 6      | 0.16848  | 0.23121   | -0.3037   | 0.64068   |
| +NA     | 6      | -0.40512 | 0.23121   | -0.8773   | 0.06708   |

Std Error uses a pooled estimate of error variance

### Means Comparisons

#### Comparisons with a control using Dunnett's Method

### Oneway Analysis of betaine By Label

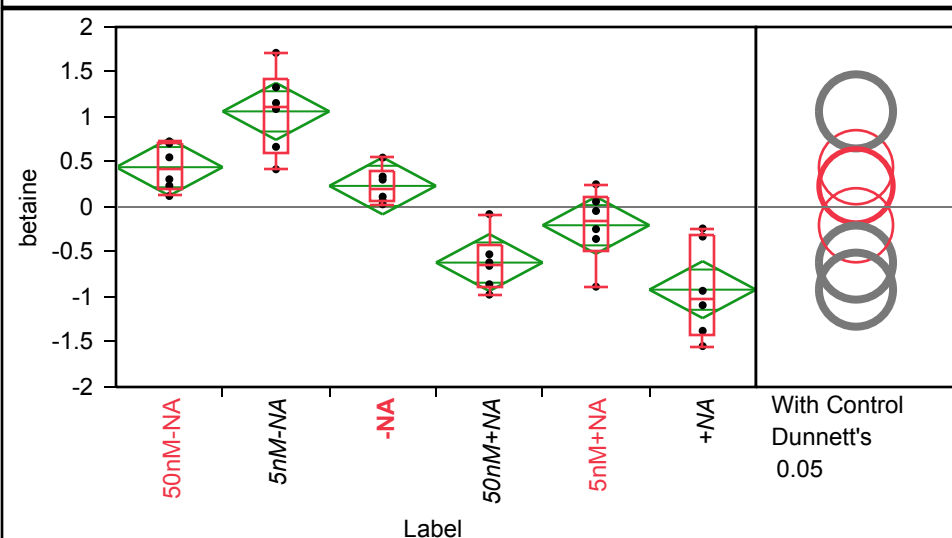

### Quantiles

| Level   | Minimum  | 10%      | 25%      | Median   | 75%      | 90%      | Maximum  |
|---------|----------|----------|----------|----------|----------|----------|----------|
| 50nM-NA | 0.122285 | 0.122285 | 0.208063 | 0.429937 | 0.712065 | 0.728499 | 0.728499 |
| 5nM-NA  | 0.419249 | 0.419249 | 0.606293 | 1.121939 | 1.425465 | 1.712836 | 1.712836 |
| -NA     | 0.030016 | 0.030016 | 0.060448 | 0.209543 | 0.390912 | 0.548527 | 0.548527 |
| 50nM+NA | -0.97364 | -0.97364 | -0.88736 | -0.63458 | -0.41413 | -0.07872 | -0.07872 |
| 5nM+NA  | -0.88552 | -0.88552 | -0.48763 | -0.14516 | 0.108727 | 0.252686 | 0.252686 |
| +NA     | -1.54572 | -1.54572 | -1.41836 | -1.01128 | -0.30608 | -0.2385  | -0.2385  |

### Oneway Anova

#### Summary of Fit

|                            |          |
|----------------------------|----------|
| Rsquare                    | 0.786169 |
| Adj Rsquare                | 0.750531 |
| Root Mean Square Error     | 0.379368 |
| Mean of Response           | 5.56e-10 |
| Observations (or Sum Wgts) | 36       |

#### Analysis of Variance

| Source   | DF | Sum of Squares | Mean Square | F Ratio | Prob > F |
|----------|----|----------------|-------------|---------|----------|
| Label    | 5  | 15.874087      | 3.17482     | 22.0596 | <.0001 * |
| Error    | 30 | 4.317605       | 0.14392     |         |          |
| C. Total | 35 | 20.191691      |             |         |          |

#### Means for Oneway Anova

| Level   | Number | Mean    | Std Error | Lower 95% | Upper 95% |
|---------|--------|---------|-----------|-----------|-----------|
| 50nM-NA | 6      | 0.4423  | 0.15488   | 0.126     | 0.759     |
| 5nM-NA  | 6      | 1.0624  | 0.15488   | 0.746     | 1.379     |
| -NA     | 6      | 0.2344  | 0.15488   | -0.082    | 0.551     |
| 50nM+NA | 6      | -0.6177 | 0.15488   | -0.934    | -0.301    |
| 5nM+NA  | 6      | -0.2029 | 0.15488   | -0.519    | 0.113     |
| +NA     | 6      | -0.9186 | 0.15488   | -1.235    | -0.602    |

Std Error uses a pooled estimate of error variance

### Means Comparisons

#### Comparisons with a control using Dunnett's Method

### Oneway Analysis of betaine aldehyde By Label

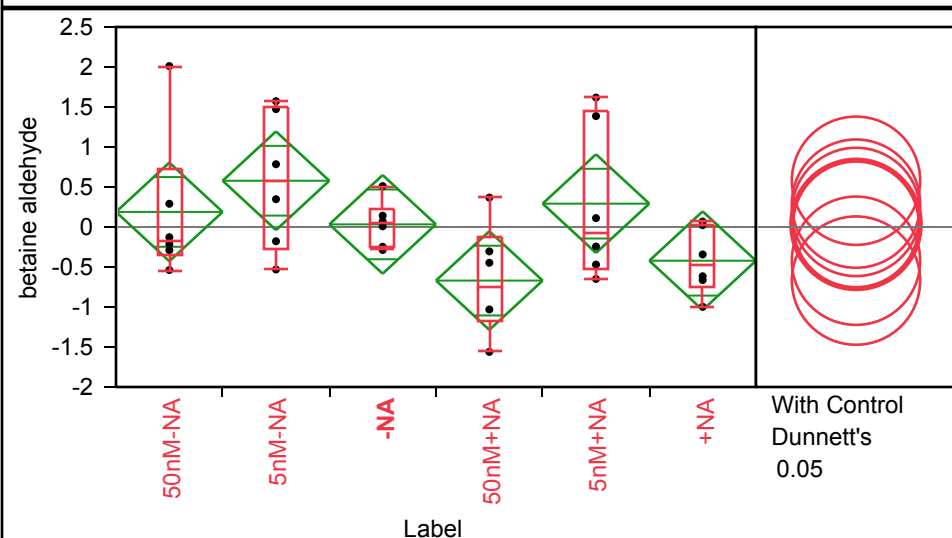

### Quantiles

| Level   | Minimum  | 10%      | 25%      | Median   | 75%      | 90%      | Maximum  |
|---------|----------|----------|----------|----------|----------|----------|----------|
| 50nM-NA | -0.53801 | -0.53801 | -0.35174 | -0.17195 | 0.720723 | 2.011233 | 2.011233 |
| 5nM-NA  | -0.53087 | -0.53087 | -0.26632 | 0.566034 | 1.498464 | 1.57253  | 1.57253  |
| -NA     | -0.28744 | -0.28744 | -0.25734 | 0.03969  | 0.233767 | 0.510583 | 0.510583 |
| 50nM+NA | -1.56096 | -1.56096 | -1.17148 | -0.73924 | -0.13703 | 0.367492 | 0.367492 |
| 5nM+NA  | -0.64936 | -0.64936 | -0.51477 | -0.06647 | 1.444096 | 1.617597 | 1.617597 |
| +NA     | -0.99717 | -0.99717 | -0.74672 | -0.47959 | 0.033967 | 0.067726 | 0.067726 |

### Oneway Anova

#### Summary of Fit

|                            |          |
|----------------------------|----------|
| Rsquare                    | 0.283705 |
| Adj Rsquare                | 0.164323 |
| Root Mean Square Error     | 0.739318 |
| Mean of Response           | 2.78e-11 |
| Observations (or Sum Wgts) | 36       |

#### Analysis of Variance

| Source   | DF | Sum of Squares | Mean Square | F Ratio | Prob > F |
|----------|----|----------------|-------------|---------|----------|
| Label    | 5  | 6.494701       | 1.29894     | 2.3764  | 0.0625   |
| Error    | 30 | 16.397737      | 0.54659     |         |          |
| C. Total | 35 | 22.892439      |             |         |          |

#### Means for Oneway Anova

| Level   | Number | Mean     | Std Error | Lower 95% | Upper 95% |
|---------|--------|----------|-----------|-----------|-----------|
| 50nM-NA | 6      | 0.18837  | 0.30183   | -0.428    | 0.805     |
| 5nM-NA  | 6      | 0.57823  | 0.30183   | -0.038    | 1.195     |
| -NA     | 6      | 0.03278  | 0.30183   | -0.584    | 0.649     |
| 50nM+NA | 6      | -0.66980 | 0.30183   | -1.286    | -0.053    |
| 5nM+NA  | 6      | 0.29194  | 0.30183   | -0.324    | 0.908     |
| +NA     | 6      | -0.42152 | 0.30183   | -1.038    | 0.195     |

Std Error uses a pooled estimate of error variance

### Means Comparisons

#### Comparisons with a control using Dunnett's Method

### Oneway Analysis of Butyrylcarnitine By Label

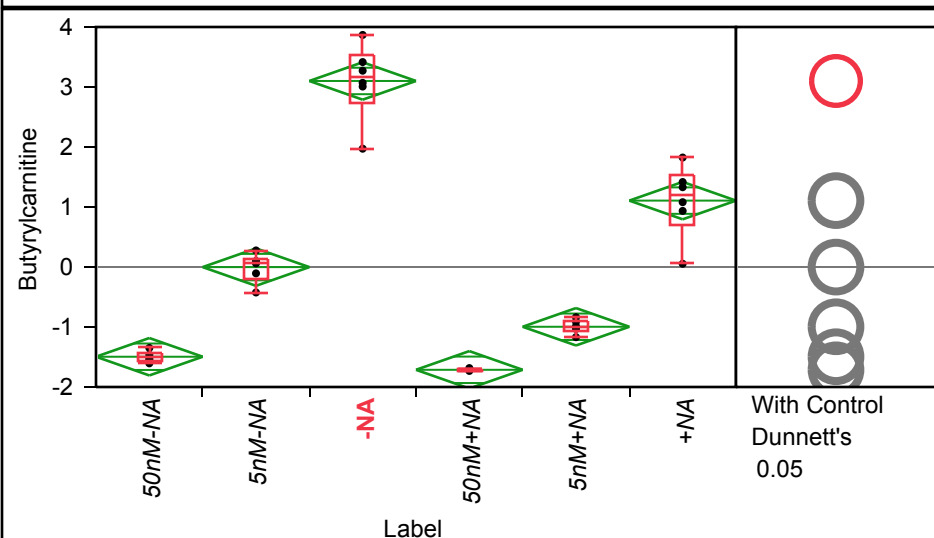

### Quantiles

| Level   | Minimum  | 10%      | 25%      | Median   | 75%      | 90%      | Maximum  |
|---------|----------|----------|----------|----------|----------|----------|----------|
| 50nM-NA | -1.60572 | -1.60572 | -1.567   | -1.50035 | -1.43485 | -1.34971 | -1.34971 |
| 5nM-NA  | -0.42467 | -0.42467 | -0.18574 | 0.072688 | 0.143446 | 0.275603 | 0.275603 |
| -NA     | 1.971726 | 1.971726 | 2.748522 | 3.170196 | 3.528478 | 3.867563 | 3.867563 |
| 50nM+NA | -1.73207 | -1.73207 | -1.72397 | -1.71572 | -1.70432 | -1.68498 | -1.68498 |
| 5nM+NA  | -1.16932 | -1.16932 | -1.07267 | -1.00928 | -0.89289 | -0.83727 | -0.83727 |
| +NA     | 0.053647 | 0.053647 | 0.714519 | 1.204953 | 1.518238 | 1.824189 | 1.824189 |

### Oneway Anova

#### Summary of Fit

|                            |          |
|----------------------------|----------|
| Rsquare                    | 0.960505 |
| Adj Rsquare                | 0.953922 |
| Root Mean Square Error     | 0.373927 |
| Mean of Response           | 5.56e-10 |
| Observations (or Sum Wgts) | 36       |

#### Analysis of Variance

| Source   | DF | Sum of Squares | Mean Square | F Ratio  | Prob > F |
|----------|----|----------------|-------------|----------|----------|
| Label    | 5  | 102.01113      | 20.4022     | 145.9165 | <.0001 * |
| Error    | 30 | 4.19464        | 0.1398      |          |          |
| C. Total | 35 | 106.20577      |             |          |          |

#### Means for Oneway Anova

| Level   | Number | Mean    | Std Error | Lower 95% | Upper 95% |
|---------|--------|---------|-----------|-----------|-----------|
| 50nM-NA | 6      | -1.4956 | 0.15265   | -1.807    | -1.184    |
| 5nM-NA  | 6      | -0.0017 | 0.15265   | -0.313    | 0.310     |
| -NA     | 6      | 3.1004  | 0.15265   | 2.789     | 3.412     |
| 50nM+NA | 6      | -1.7134 | 0.15265   | -2.025    | -1.402    |
| 5nM+NA  | 6      | -0.9962 | 0.15265   | -1.308    | -0.684    |
| +NA     | 6      | 1.1065  | 0.15265   | 0.795     | 1.418     |

Std Error uses a pooled estimate of error variance

### Means Comparisons

#### Comparisons with a control using Dunnett's Method

### Oneway Analysis of Carbamoyl phosphate By Label

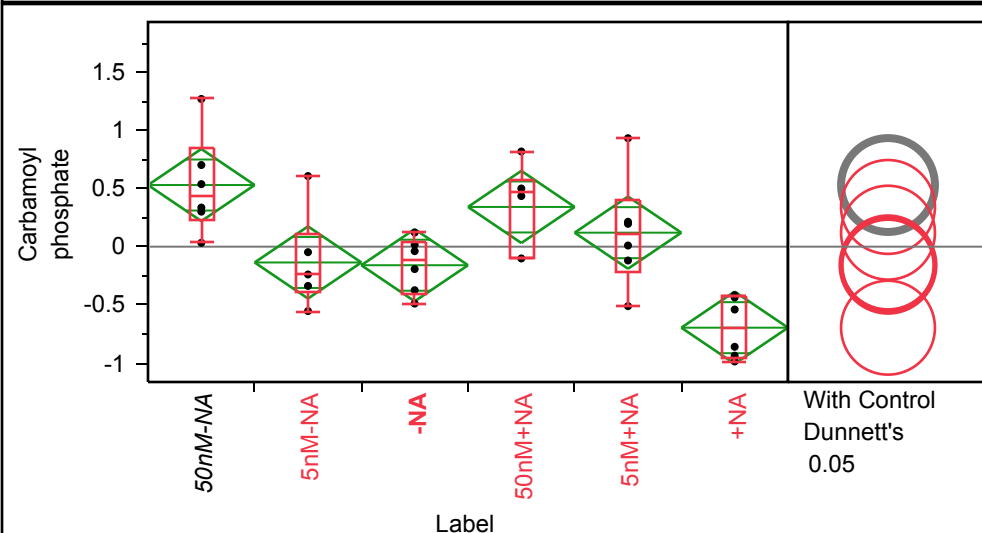

### Quantiles

| Level   | Minimum  | 10%      | 25%      | Median   | 75%      | 90%      | Maximum  |
|---------|----------|----------|----------|----------|----------|----------|----------|
| 50nM-NA | 0.033141 | 0.033141 | 0.234063 | 0.436542 | 0.843483 | 1.269066 | 1.269066 |
| 5nM-NA  | -0.55337 | -0.55337 | -0.39141 | -0.24154 | 0.116193 | 0.606559 | 0.606559 |
| -NA     | -0.48896 | -0.48896 | -0.40307 | -0.1154  | 0.042646 | 0.121189 | 0.121189 |
| 50nM+NA | -0.10122 | -0.10122 | -0.1012  | 0.466416 | 0.579295 | 0.817818 | 0.817818 |
| 5nM+NA  | -0.5108  | -0.5108  | -0.21691 | 0.103047 | 0.393193 | 0.931902 | 0.931902 |
| +NA     | -0.98641 | -0.98641 | -0.94892 | -0.70026 | -0.4315  | -0.41705 | -0.41705 |

### Oneway Anova

#### Summary of Fit

|                            |          |
|----------------------------|----------|
| Rsquare                    | 0.576316 |
| Adj Rsquare                | 0.505702 |
| Root Mean Square Error     | 0.371757 |
| Mean of Response           | -2.8e-11 |
| Observations (or Sum Wgts) | 36       |

#### Analysis of Variance

| Source   | DF | Sum of Squares | Mean Square | F Ratio | Prob > F |
|----------|----|----------------|-------------|---------|----------|
| Label    | 5  | 5.6397367      | 1.12795     | 8.1615  | <.0001 * |
| Error    | 30 | 4.1461004      | 0.13820     |         |          |
| C. Total | 35 | 9.7858370      |             |         |          |

#### Means for Oneway Anova

| Level   | Number | Mean     | Std Error | Lower 95% | Upper 95% |
|---------|--------|----------|-----------|-----------|-----------|
| 50nM-NA | 6      | 0.52966  | 0.15177   | 0.220     | 0.8396    |
| 5nM-NA  | 6      | -0.13576 | 0.15177   | -0.446    | 0.1742    |
| -NA     | 6      | -0.15942 | 0.15177   | -0.469    | 0.1505    |
| 50nM+NA | 6      | 0.34134  | 0.15177   | 0.031     | 0.6513    |
| 5nM+NA  | 6      | 0.12031  | 0.15177   | -0.190    | 0.4303    |
| +NA     | 6      | -0.69612 | 0.15177   | -1.006    | -0.3862   |

Std Error uses a pooled estimate of error variance

### Means Comparisons

#### Comparisons with a control using Dunnett's Method

### Oneway Analysis of carnitine By Label

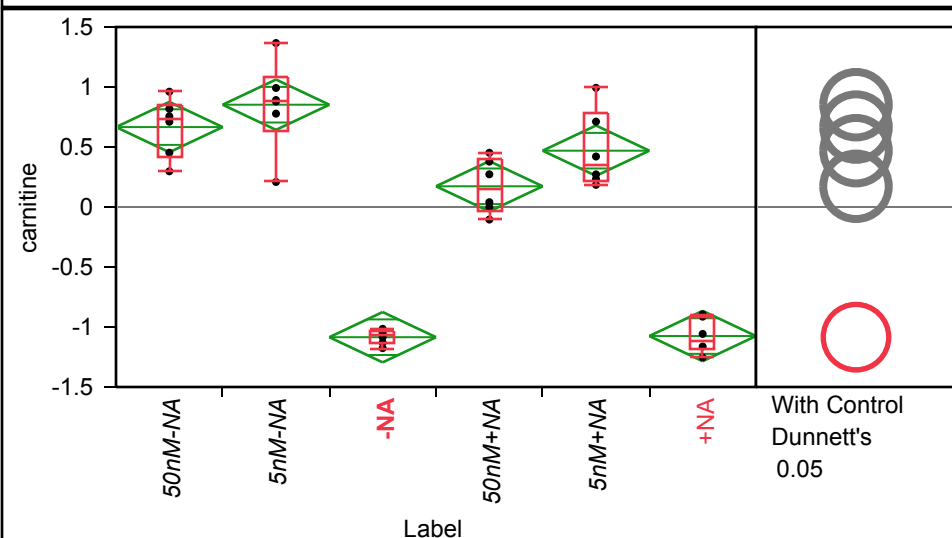

### Quantiles

| Level   | Minimum  | 10%      | 25%      | Median   | 75%      | 90%      | Maximum  |
|---------|----------|----------|----------|----------|----------|----------|----------|
| 50nM-NA | 0.297477 | 0.297477 | 0.413949 | 0.733194 | 0.853926 | 0.960944 | 0.960944 |
| 5nM-NA  | 0.208587 | 0.208587 | 0.63546  | 0.88511  | 1.085496 | 1.366386 | 1.366386 |
| -NA     | -1.17626 | -1.17626 | -1.14148 | -1.07321 | -1.03567 | -1.01511 | -1.01511 |
| 50nM+NA | -0.10464 | -0.10464 | -0.02778 | 0.156171 | 0.396651 | 0.452214 | 0.452214 |
| 5nM+NA  | 0.184757 | 0.184757 | 0.2214   | 0.346315 | 0.78194  | 0.99303  | 0.99303  |
| +NA     | -1.25298 | -1.25298 | -1.19069 | -1.11025 | -0.90906 | -0.89464 | -0.89464 |

### Oneway Anova

#### Summary of Fit

|                            |          |
|----------------------------|----------|
| Rsquare                    | 0.922266 |
| Adj Rsquare                | 0.909311 |
| Root Mean Square Error     | 0.251553 |
| Mean of Response           | -2.8e-11 |
| Observations (or Sum Wgts) | 36       |

#### Analysis of Variance

| Source   | DF | Sum of Squares | Mean Square | F Ratio | Prob > F |
|----------|----|----------------|-------------|---------|----------|
| Label    | 5  | 22.523141      | 4.50463     | 71.1867 | <.0001 * |
| Error    | 30 | 1.898372       | 0.06328     |         |          |
| C. Total | 35 | 24.421513      |             |         |          |

#### Means for Oneway Anova

| Level   | Number | Mean    | Std Error | Lower 95% | Upper 95% |
|---------|--------|---------|-----------|-----------|-----------|
| 50nM-NA | 6      | 0.6660  | 0.10270   | 0.456     | 0.876     |
| 5nM-NA  | 6      | 0.8525  | 0.10270   | 0.643     | 1.062     |
| -NA     | 6      | -1.0850 | 0.10270   | -1.295    | -0.875    |
| 50nM+NA | 6      | 0.1726  | 0.10270   | -0.037    | 0.382     |
| 5nM+NA  | 6      | 0.4693  | 0.10270   | 0.260     | 0.679     |
| +NA     | 6      | -1.0753 | 0.10270   | -1.285    | -0.866    |

Std Error uses a pooled estimate of error variance

### Means Comparisons

#### Comparisons with a control using Dunnett's Method

### Oneway Analysis of CDP By Label

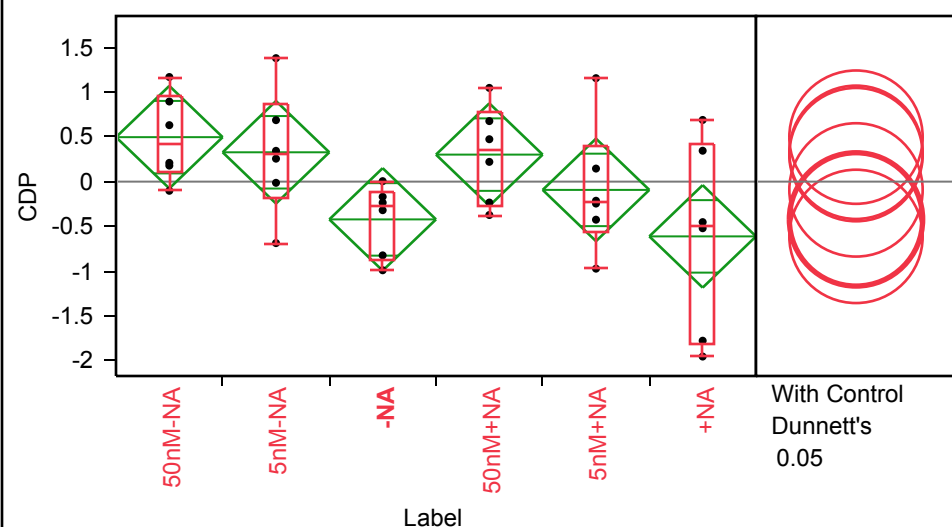

### Quantiles

| Level   | Minimum  | 10%      | 25%      | Median   | 75%      | 90%      | Maximum  |
|---------|----------|----------|----------|----------|----------|----------|----------|
| 50nM-NA | -0.10233 | -0.10233 | 0.108562 | 0.420131 | 0.963178 | 1.168386 | 1.168386 |
| 5nM-NA  | -0.68668 | -0.68668 | -0.18172 | 0.300116 | 0.859747 | 1.37908  | 1.37908  |
| -NA     | -0.9901  | -0.9901  | -0.86533 | -0.27698 | -0.12546 | 0.005174 | 0.005174 |
| 50nM+NA | -0.37285 | -0.37285 | -0.26851 | 0.347117 | 0.768736 | 1.046851 | 1.046851 |
| 5nM+NA  | -0.97205 | -0.97205 | -0.562   | -0.22936 | 0.398156 | 1.155479 | 1.155479 |
| +NA     | -1.95389 | -1.95389 | -1.82126 | -0.48644 | 0.431072 | 0.688817 | 0.688817 |

### Oneway Anova

#### Summary of Fit

|                            |          |
|----------------------------|----------|
| Rsquare                    | 0.299106 |
| Adj Rsquare                | 0.182291 |
| Root Mean Square Error     | 0.686557 |
| Mean of Response           | -1.1e-10 |
| Observations (or Sum Wgts) | 36       |

#### Analysis of Variance

| Source   | DF | Sum of Squares | Mean Square | F Ratio | Prob > F |
|----------|----|----------------|-------------|---------|----------|
| Label    | 5  | 6.034591       | 1.20692     | 2.5605  | 0.0481 * |
| Error    | 30 | 14.140805      | 0.47136     |         |          |
| C. Total | 35 | 20.175396      |             |         |          |

#### Means for Oneway Anova

| Level   | Number | Mean     | Std Error | Lower 95% | Upper 95% |
|---------|--------|----------|-----------|-----------|-----------|
| 50nM-NA | 6      | 0.49666  | 0.28029   | -0.076    | 1.069     |
| 5nM-NA  | 6      | 0.32764  | 0.28029   | -0.245    | 0.900     |
| -NA     | 6      | -0.42194 | 0.28029   | -0.994    | 0.150     |
| 50nM+NA | 6      | 0.30176  | 0.28029   | -0.271    | 0.874     |
| 5nM+NA  | 6      | -0.09248 | 0.28029   | -0.665    | 0.480     |
| +NA     | 6      | -0.61164 | 0.28029   | -1.184    | -0.039    |

Std Error uses a pooled estimate of error variance

### Means Comparisons

#### Comparisons with a control using Dunnett's Method

### Oneway Analysis of Cholesterol By Label

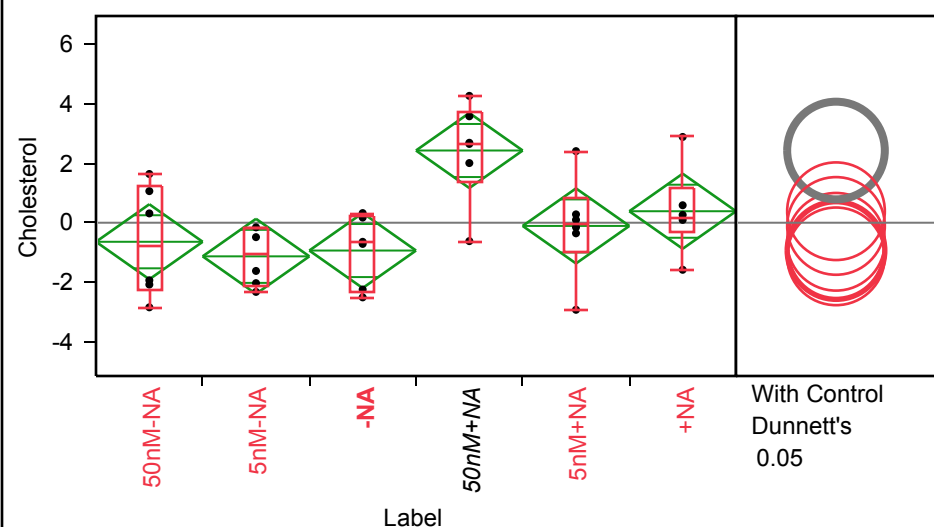

### Quantiles

| Level   | Minimum  | 10%      | 25%      | Median   | 75%      | 90%      | Maximum  |
|---------|----------|----------|----------|----------|----------|----------|----------|
| 50nM-NA | -2.84656 | -2.84656 | -2.27238 | -0.81164 | 1.207565 | 1.63996  | 1.63996  |
| 5nM-NA  | -2.32711 | -2.32711 | -2.10679 | -1.05359 | -0.16226 | -0.15559 | -0.15559 |
| -NA     | -2.51119 | -2.51119 | -2.31333 | -0.67774 | 0.21173  | 0.324181 | 0.324181 |
| 50nM+NA | -0.61897 | -0.61897 | 1.350805 | 2.670509 | 3.753075 | 4.268537 | 4.268537 |
| 5nM+NA  | -2.92899 | -2.92899 | -0.99927 | -0.02673 | 0.813017 | 2.408627 | 2.408627 |
| +NA     | -1.58309 | -1.58309 | -0.3423  | 0.179221 | 1.16235  | 2.885683 | 2.885683 |

### Oneway Anova

#### Summary of Fit

|                            |          |
|----------------------------|----------|
| Rsquare                    | 0.429515 |
| Adj Rsquare                | 0.334434 |
| Root Mean Square Error     | 1.514315 |
| Mean of Response           | 5.56e-10 |
| Observations (or Sum Wgts) | 36       |

#### Analysis of Variance

| Source   | DF | Sum of Squares | Mean Square | F Ratio | Prob > F |
|----------|----|----------------|-------------|---------|----------|
| Label    | 5  | 51.79491       | 10.3590     | 4.5174  | 0.0035 * |
| Error    | 30 | 68.79446       | 2.2931      |         |          |
| C. Total | 35 | 120.58937      |             |         |          |

#### Means for Oneway Anova

| Level   | Number | Mean    | Std Error | Lower 95% | Upper 95% |
|---------|--------|---------|-----------|-----------|-----------|
| 50nM-NA | 6      | -0.6412 | 0.61822   | -1.904    | 0.6213    |
| 5nM-NA  | 6      | -1.1313 | 0.61822   | -2.394    | 0.1313    |
| -NA     | 6      | -0.9359 | 0.61822   | -2.199    | 0.3266    |
| 50nM+NA | 6      | 2.4299  | 0.61822   | 1.167     | 3.6924    |
| 5nM+NA  | 6      | -0.1081 | 0.61822   | -1.371    | 1.1544    |
| +NA     | 6      | 0.3867  | 0.61822   | -0.876    | 1.6493    |

Std Error uses a pooled estimate of error variance

### Means Comparisons

#### Comparisons with a control using Dunnett's Method

### Oneway Analysis of choline By Label

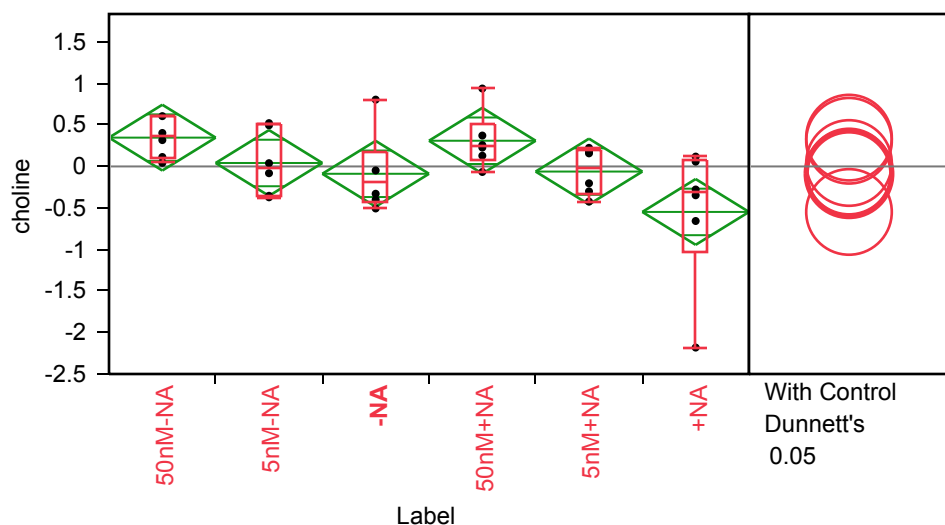

### Quantiles

| Level   | Minimum  | 10%      | 25%      | Median   | 75%      | 90%      | Maximum  |
|---------|----------|----------|----------|----------|----------|----------|----------|
| 50nM-NA | 0.043262 | 0.043262 | 0.09603  | 0.360174 | 0.600594 | 0.605887 | 0.605887 |
| 5nM-NA  | -0.37177 | -0.37177 | -0.35829 | -0.0212  | 0.502189 | 0.521495 | 0.521495 |
| -NA     | -0.50617 | -0.50617 | -0.42757 | -0.18973 | 0.164954 | 0.804578 | 0.804578 |
| 50nM+NA | -0.06664 | -0.06664 | 0.080181 | 0.242078 | 0.513551 | 0.938341 | 0.938341 |
| 5nM+NA  | -0.42345 | -0.42345 | -0.33114 | -0.02266 | 0.187595 | 0.223817 | 0.223817 |
| +NA     | -2.18158 | -2.18158 | -1.03824 | -0.31263 | 0.073002 | 0.118409 | 0.118409 |

### Oneway Anova

#### Summary of Fit

|                            |          |
|----------------------------|----------|
| Rsquare                    | 0.31943  |
| Adj Rsquare                | 0.206002 |
| Root Mean Square Error     | 0.475129 |
| Mean of Response           | -5.6e-10 |
| Observations (or Sum Wgts) | 36       |

#### Analysis of Variance

| Source   | DF | Sum of Squares | Mean Square | F Ratio | Prob > F |
|----------|----|----------------|-------------|---------|----------|
| Label    | 5  | 3.1786961      | 0.635739    | 2.8161  | 0.0335 * |
| Error    | 30 | 6.7724408      | 0.225748    |         |          |
| C. Total | 35 | 9.9511369      |             |         |          |

#### Means for Oneway Anova

| Level   | Number | Mean     | Std Error | Lower 95% | Upper 95% |
|---------|--------|----------|-----------|-----------|-----------|
| 50nM-NA | 6      | 0.34699  | 0.19397   | -0.0492   | 0.7431    |
| 5nM-NA  | 6      | 0.04155  | 0.19397   | -0.3546   | 0.4377    |
| -NA     | 6      | -0.08844 | 0.19397   | -0.4846   | 0.3077    |
| 50nM+NA | 6      | 0.30949  | 0.19397   | -0.0867   | 0.7056    |
| 5nM+NA  | 6      | -0.06163 | 0.19397   | -0.4578   | 0.3345    |
| +NA     | 6      | -0.54795 | 0.19397   | -0.9441   | -0.1518   |

Std Error uses a pooled estimate of error variance

### Means Comparisons

#### Comparisons with a control using Dunnett's Method

### Oneway Analysis of Chondroitin By Label

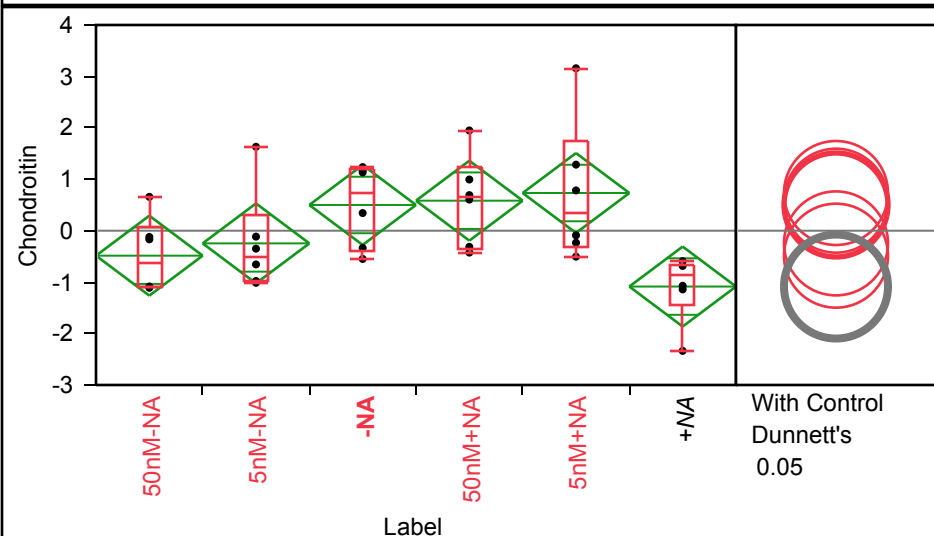

### Quantiles

| Level   | Minimum  | 10%      | 25%      | Median   | 75%      | 90%      | Maximum  |
|---------|----------|----------|----------|----------|----------|----------|----------|
| 50nM-NA | -1.10974 | -1.10974 | -1.09217 | -0.62632 | 0.073825 | 0.658421 | 0.658421 |
| 5nM-NA  | -1.01308 | -1.01308 | -0.9864  | -0.50235 | 0.321889 | 1.632012 | 1.632012 |
| -NA     | -0.54869 | -0.54869 | -0.38923 | 0.738717 | 1.188874 | 1.236908 | 1.236908 |
| 50nM+NA | -0.42544 | -0.42544 | -0.34159 | 0.648759 | 1.233935 | 1.949238 | 1.949238 |
| 5nM+NA  | -0.50437 | -0.50437 | -0.30145 | 0.34644  | 1.753304 | 3.158821 | 3.158821 |
| +NA     | -2.33675 | -2.33675 | -1.43992 | -0.88005 | -0.66182 | -0.59139 | -0.59139 |

### Oneway Anova

#### Summary of Fit

|                            |          |
|----------------------------|----------|
| Rsquare                    | 0.374824 |
| Adj Rsquare                | 0.270628 |
| Root Mean Square Error     | 0.931954 |
| Mean of Response           | 5.56e-10 |
| Observations (or Sum Wgts) | 36       |

#### Analysis of Variance

| Source   | DF | Sum of Squares | Mean Square | F Ratio | Prob > F |
|----------|----|----------------|-------------|---------|----------|
| Label    | 5  | 15.621952      | 3.12439     | 3.5973  | 0.0115 * |
| Error    | 30 | 26.056154      | 0.86854     |         |          |
| C. Total | 35 | 41.678106      |             |         |          |

#### Means for Oneway Anova

| Level   | Number | Mean    | Std Error | Lower 95% | Upper 95% |
|---------|--------|---------|-----------|-----------|-----------|
| 50nM-NA | 6      | -0.4852 | 0.38047   | -1.262    | 0.292     |
| 5nM-NA  | 6      | -0.2464 | 0.38047   | -1.023    | 0.531     |
| -NA     | 6      | 0.5004  | 0.38047   | -0.277    | 1.277     |
| 50nM+NA | 6      | 0.5839  | 0.38047   | -0.193    | 1.361     |
| 5nM+NA  | 6      | 0.7331  | 0.38047   | -0.044    | 1.510     |
| +NA     | 6      | -1.0858 | 0.38047   | -1.863    | -0.309    |

Std Error uses a pooled estimate of error variance

### Means Comparisons

#### Comparisons with a control using Dunnett's Method

### Oneway Analysis of Citric acid By Label

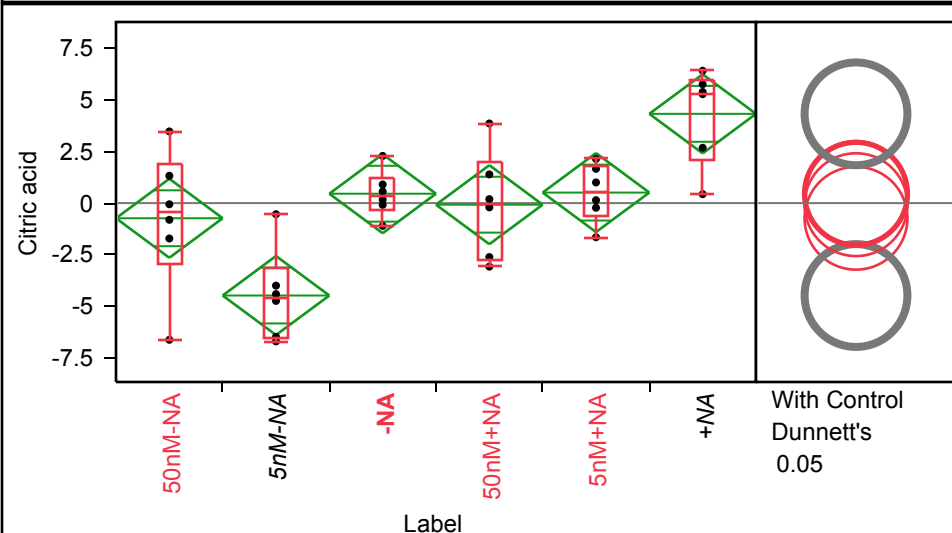

### Quantiles

| Level   | Minimum  | 10%      | 25%      | Median   | 75%      | 90%      | Maximum  |
|---------|----------|----------|----------|----------|----------|----------|----------|
| 50nM-NA | -6.62705 | -6.62705 | -2.94419 | -0.43342 | 1.862288 | 3.474572 | 3.474572 |
| 5nM-NA  | -6.70506 | -6.70506 | -6.54058 | -4.57774 | -3.1368  | -0.53948 | -0.53948 |
| -NA     | -1.10502 | -1.10502 | -0.34079 | 0.364703 | 1.24942  | 2.287295 | 2.287295 |
| 50nM+NA | -3.0793  | -3.0793  | -2.73258 | -0.0071  | 2.008354 | 3.859498 | 3.859498 |
| 5nM+NA  | -1.65604 | -1.65604 | -0.58288 | 0.57058  | 1.781055 | 2.140037 | 2.140037 |
| +NA     | 0.434736 | 0.434736 | 2.120807 | 5.335073 | 5.926992 | 6.417313 | 6.417313 |

### Oneway Anova

#### Summary of Fit

|                            |          |
|----------------------------|----------|
| Rsquare                    | 0.601362 |
| Adj Rsquare                | 0.534923 |
| Root Mean Square Error     | 2.29792  |
| Mean of Response           | 5.56e-10 |
| Observations (or Sum Wgts) | 36       |

#### Analysis of Variance

| Source   | DF | Sum of Squares | Mean Square | F Ratio | Prob > F |
|----------|----|----------------|-------------|---------|----------|
| Label    | 5  | 238.97313      | 47.7946     | 9.0513  | <.0001 * |
| Error    | 30 | 158.41315      | 5.2804      |         |          |
| C. Total | 35 | 397.38628      |             |         |          |

#### Means for Oneway Anova

| Level   | Number | Mean    | Std Error | Lower 95% | Upper 95% |
|---------|--------|---------|-----------|-----------|-----------|
| 50nM-NA | 6      | -0.7352 | 0.93812   | -2.651    | 1.181     |
| 5nM-NA  | 6      | -4.4814 | 0.93812   | -6.397    | -2.565    |
| -NA     | 6      | 0.4548  | 0.93812   | -1.461    | 2.371     |
| 50nM+NA | 6      | -0.0766 | 0.93812   | -1.993    | 1.839     |
| 5nM+NA  | 6      | 0.5102  | 0.93812   | -1.406    | 2.426     |
| +NA     | 6      | 4.3281  | 0.93812   | 2.412     | 6.244     |

Std Error uses a pooled estimate of error variance

### Means Comparisons

#### Comparisons with a control using Dunnett's Method

### Oneway Analysis of citrulline By Label

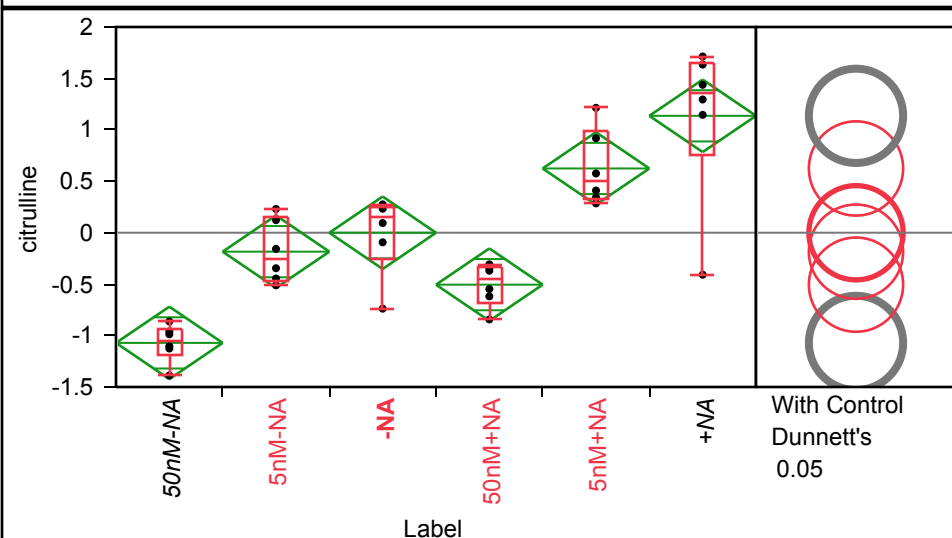

### Quantiles

| Level   | Minimum  | 10%      | 25%      | Median   | 75%      | 90%      | Maximum  |
|---------|----------|----------|----------|----------|----------|----------|----------|
| 50nM-NA | -1.38779 | -1.38779 | -1.19132 | -1.04526 | -0.93604 | -0.8626  | -0.8626  |
| 5nM-NA  | -0.51127 | -0.51127 | -0.46178 | -0.25138 | 0.149323 | 0.2312   | 0.2312   |
| -NA     | -0.73838 | -0.73838 | -0.25443 | 0.160125 | 0.24393  | 0.275551 | 0.275551 |
| 50nM+NA | -0.84316 | -0.84316 | -0.67467 | -0.45839 | -0.335   | -0.30783 | -0.30783 |
| 5nM+NA  | 0.285188 | 0.285188 | 0.32869  | 0.493201 | 0.992546 | 1.214149 | 1.214149 |
| +NA     | -0.40826 | -0.40826 | 0.757019 | 1.366643 | 1.654383 | 1.713091 | 1.713091 |

### Oneway Anova

#### Summary of Fit

|                            |          |
|----------------------------|----------|
| Rsquare                    | 0.777572 |
| Adj Rsquare                | 0.740501 |
| Root Mean Square Error     | 0.42236  |
| Mean of Response           | 2.78e-10 |
| Observations (or Sum Wgts) | 36       |

#### Analysis of Variance

| Source   | DF | Sum of Squares | Mean Square | F Ratio | Prob > F |
|----------|----|----------------|-------------|---------|----------|
| Label    | 5  | 18.708482      | 3.74170     | 20.9750 | <.0001 * |
| Error    | 30 | 5.351647       | 0.17839     |         |          |
| C. Total | 35 | 24.060129      |             |         |          |

#### Means for Oneway Anova

| Level   | Number | Mean     | Std Error | Lower 95% | Upper 95% |
|---------|--------|----------|-----------|-----------|-----------|
| 50nM-NA | 6      | -1.0712  | 0.17243   | -1.423    | -0.719    |
| 5nM-NA  | 6      | -0.1843  | 0.17243   | -0.536    | 0.168     |
| -NA     | 6      | -0.00038 | 0.17243   | -0.353    | 0.352     |
| 50nM+NA | 6      | -0.5051  | 0.17243   | -0.857    | -0.153    |
| 5nM+NA  | 6      | 0.6246   | 0.17243   | 0.272     | 0.977     |
| +NA     | 6      | 1.1364   | 0.17243   | 0.784     | 1.489     |

Std Error uses a pooled estimate of error variance

### Means Comparisons

#### Comparisons with a control using Dunnett's Method

### Oneway Analysis of CMP By Label

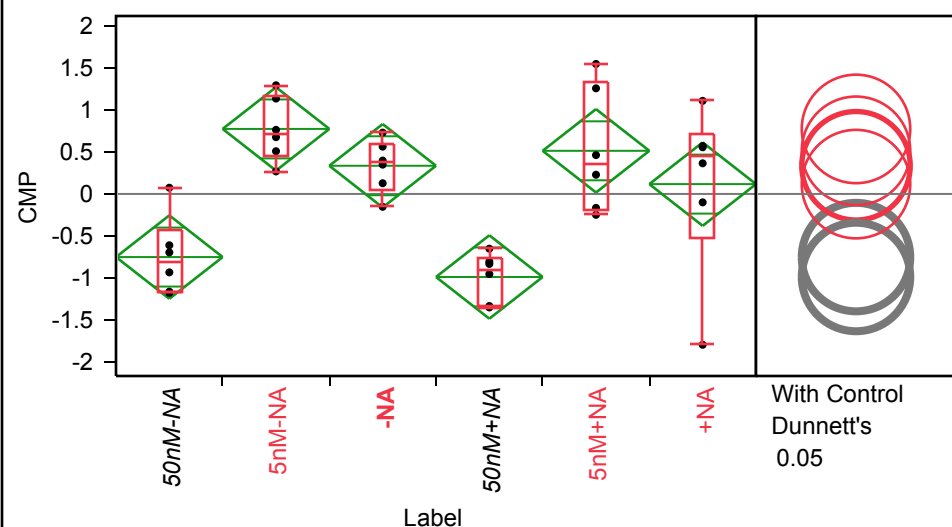

### Quantiles

| Level   | Minimum  | 10%      | 25%      | Median   | 75%      | 90%      | Maximum  |
|---------|----------|----------|----------|----------|----------|----------|----------|
| 50nM-NA | -1.17491 | -1.17491 | -1.1632  | -0.81191 | -0.43835 | 0.073696 | 0.073696 |
| 5nM-NA  | 0.267453 | 0.267453 | 0.446982 | 0.716868 | 1.170945 | 1.288873 | 1.288873 |
| -NA     | -0.15263 | -0.15263 | 0.057233 | 0.371648 | 0.602737 | 0.727137 | 0.727137 |
| 50nM+NA | -1.3465  | -1.3465  | -1.33385 | -0.89078 | -0.76552 | -0.64941 | -0.64941 |
| 5nM+NA  | -0.24748 | -0.24748 | -0.18608 | 0.344264 | 1.325127 | 1.541926 | 1.541926 |
| +NA     | -1.78938 | -1.78938 | -0.52227 | 0.458579 | 0.701649 | 1.104427 | 1.104427 |

### Oneway Anova

#### Summary of Fit

|                            |          |
|----------------------------|----------|
| Rsquare                    | 0.588134 |
| Adj Rsquare                | 0.51949  |
| Root Mean Square Error     | 0.593367 |
| Mean of Response           | 5.56e-10 |
| Observations (or Sum Wgts) | 36       |

#### Analysis of Variance

| Source   | DF | Sum of Squares | Mean Square | F Ratio | Prob > F |
|----------|----|----------------|-------------|---------|----------|
| Label    | 5  | 15.083044      | 3.01661     | 8.5679  | <.0001 * |
| Error    | 30 | 10.562532      | 0.35208     |         |          |
| C. Total | 35 | 25.645576      |             |         |          |

#### Means for Oneway Anova

| Level   | Number | Mean     | Std Error | Lower 95% | Upper 95% |
|---------|--------|----------|-----------|-----------|-----------|
| 50nM-NA | 6      | -0.74889 | 0.24224   | -1.244    | -0.254    |
| 5nM-NA  | 6      | 0.77142  | 0.24224   | 0.277     | 1.266     |
| -NA     | 6      | 0.33438  | 0.24224   | -0.160    | 0.829     |
| 50nM+NA | 6      | -0.98522 | 0.24224   | -1.480    | -0.490    |
| 5nM+NA  | 6      | 0.51170  | 0.24224   | 0.017     | 1.006     |
| +NA     | 6      | 0.11662  | 0.24224   | -0.378    | 0.611     |

Std Error uses a pooled estimate of error variance

### Means Comparisons

#### Comparisons with a control using Dunnett's Method

### Oneway Analysis of CMP-N-acetylneuraminic acid By Label

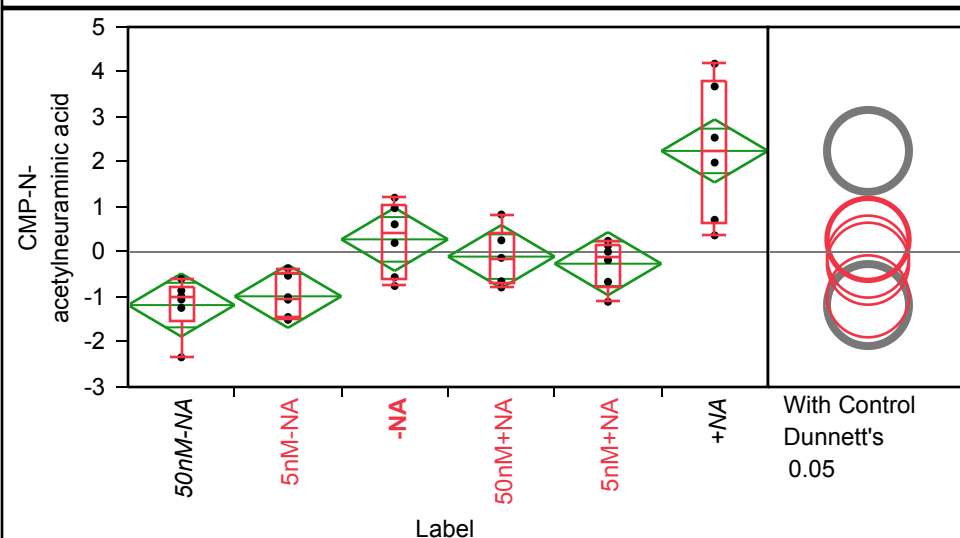

### Quantiles

| Level   | Minimum  | 10%      | 25%      | Median   | 75%      | 90%      | Maximum  |
|---------|----------|----------|----------|----------|----------|----------|----------|
| 50nM-NA | -2.34093 | -2.34093 | -1.51728 | -1.01894 | -0.79247 | -0.59843 | -0.59843 |
| 5nM-NA  | -1.50791 | -1.50791 | -1.46066 | -1.03219 | -0.48708 | -0.36561 | -0.36561 |
| -NA     | -0.75488 | -0.75488 | -0.60851 | 0.408864 | 1.031955 | 1.206422 | 1.206422 |
| 50nM+NA | -0.7881  | -0.7881  | -0.68523 | -0.1342  | 0.402918 | 0.833351 | 0.833351 |
| 5nM+NA  | -1.10564 | -1.10564 | -0.77339 | -0.08897 | 0.166474 | 0.248714 | 0.248714 |
| +NA     | 0.369068 | 0.369068 | 0.628897 | 2.264318 | 3.805741 | 4.184549 | 4.184549 |

### Oneway Anova

#### Summary of Fit

|                            |          |
|----------------------------|----------|
| Rsquare                    | 0.682107 |
| Adj Rsquare                | 0.629125 |
| Root Mean Square Error     | 0.839648 |
| Mean of Response           | 4.93e-17 |
| Observations (or Sum Wgts) | 36       |

#### Analysis of Variance

| Source   | DF | Sum of Squares | Mean Square | F Ratio | Prob > F |
|----------|----|----------------|-------------|---------|----------|
| Label    | 5  | 45.382383      | 9.07648     | 12.8743 | <.0001 * |
| Error    | 30 | 21.150263      | 0.70501     |         |          |
| C. Total | 35 | 66.532646      |             |         |          |

#### Means for Oneway Anova

| Level   | Number | Mean    | Std Error | Lower 95% | Upper 95% |
|---------|--------|---------|-----------|-----------|-----------|
| 50nM-NA | 6      | -1.1795 | 0.34278   | -1.880    | -0.479    |
| 5nM-NA  | 6      | -0.9851 | 0.34278   | -1.685    | -0.285    |
| -NA     | 6      | 0.2806  | 0.34278   | -0.420    | 0.981     |
| 50nM+NA | 6      | -0.1024 | 0.34278   | -0.802    | 0.598     |
| 5nM+NA  | 6      | -0.2597 | 0.34278   | -0.960    | 0.440     |
| +NA     | 6      | 2.2462  | 0.34278   | 1.546     | 2.946     |

Std Error uses a pooled estimate of error variance

### Means Comparisons

#### Comparisons with a control using Dunnett's Method

### Oneway Analysis of creatine By Label

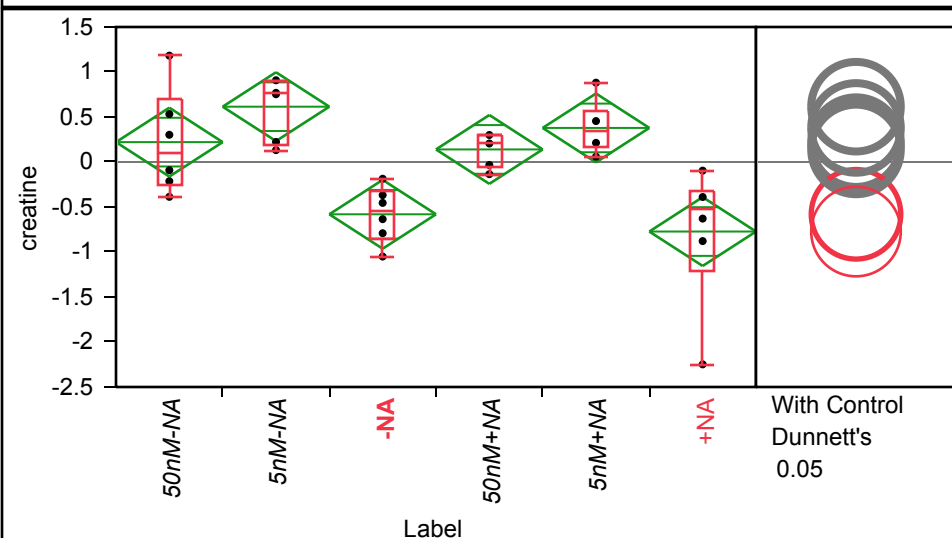

### Quantiles

| Level   | Minimum  | 10%      | 25%      | Median   | 75%      | 90%      | Maximum  |
|---------|----------|----------|----------|----------|----------|----------|----------|
| 50nM-NA | -0.38706 | -0.38706 | -0.25685 | 0.105417 | 0.695104 | 1.181597 | 1.181597 |
| 5nM-NA  | 0.132105 | 0.132105 | 0.199799 | 0.760616 | 0.90465  | 0.908161 | 0.908161 |
| -NA     | -1.05054 | -1.05054 | -0.85623 | -0.54481 | -0.32263 | -0.18635 | -0.18635 |
| 50nM+NA | -0.135   | -0.135   | -0.05867 | 0.204615 | 0.297704 | 0.30013  | 0.30013  |
| 5nM+NA  | 0.058881 | 0.058881 | 0.171289 | 0.33375  | 0.561454 | 0.881403 | 0.881403 |
| +NA     | -2.24841 | -2.24841 | -1.22106 | -0.51173 | -0.31579 | -0.09602 | -0.09602 |

### Oneway Anova

#### Summary of Fit

|                            |          |
|----------------------------|----------|
| Rsquare                    | 0.591588 |
| Adj Rsquare                | 0.523519 |
| Root Mean Square Error     | 0.458677 |
| Mean of Response           | -2.8e-10 |
| Observations (or Sum Wgts) | 36       |

#### Analysis of Variance

| Source   | DF | Sum of Squares | Mean Square | F Ratio | Prob > F |
|----------|----|----------------|-------------|---------|----------|
| Label    | 5  | 9.142294       | 1.82846     | 8.6910  | <.0001 * |
| Error    | 30 | 6.311532       | 0.21038     |         |          |
| C. Total | 35 | 15.453826      |             |         |          |

#### Means for Oneway Anova

| Level   | Number | Mean     | Std Error | Lower 95% | Upper 95% |
|---------|--------|----------|-----------|-----------|-----------|
| 50nM-NA | 6      | 0.22081  | 0.18725   | -0.162    | 0.6032    |
| 5nM-NA  | 6      | 0.61456  | 0.18725   | 0.232     | 0.9970    |
| -NA     | 6      | -0.58100 | 0.18725   | -0.963    | -0.1986   |
| 50nM+NA | 6      | 0.13967  | 0.18725   | -0.243    | 0.5221    |
| 5nM+NA  | 6      | 0.37856  | 0.18725   | -0.0039   | 0.7610    |
| +NA     | 6      | -0.77259 | 0.18725   | -1.155    | -0.3902   |

Std Error uses a pooled estimate of error variance

### Means Comparisons

#### Comparisons with a control using Dunnett's Method

### Oneway Analysis of Creatinine By Label

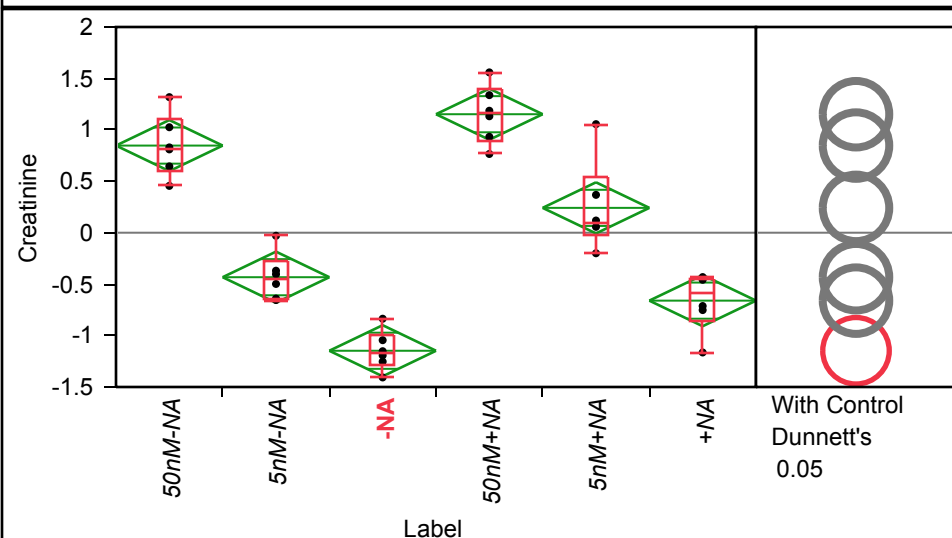

### Quantiles

| Level   | Minimum  | 10%      | 25%      | Median   | 75%      | 90%      | Maximum  |
|---------|----------|----------|----------|----------|----------|----------|----------|
| 50nM-NA | 0.455337 | 0.455337 | 0.597391 | 0.819742 | 1.098537 | 1.317918 | 1.317918 |
| 5nM-NA  | -0.65442 | -0.65442 | -0.64397 | -0.45072 | -0.28449 | -0.02979 | -0.02979 |
| -NA     | -1.40703 | -1.40703 | -1.29172 | -1.17235 | -0.99274 | -0.83623 | -0.83623 |
| 50nM+NA | 0.765479 | 0.765479 | 0.890815 | 1.158928 | 1.392774 | 1.558608 | 1.558608 |
| 5nM+NA  | -0.19971 | -0.19971 | -0.01268 | 0.087853 | 0.5399   | 1.055384 | 1.055384 |
| +NA     | -1.16426 | -1.16426 | -0.85514 | -0.58522 | -0.44091 | -0.43148 | -0.43148 |

### Oneway Anova

#### Summary of Fit

|                            |          |
|----------------------------|----------|
| Rsquare                    | 0.901042 |
| Adj Rsquare                | 0.884548 |
| Root Mean Square Error     | 0.298024 |
| Mean of Response           | -5.6e-10 |
| Observations (or Sum Wgts) | 36       |

#### Analysis of Variance

| Source   | DF | Sum of Squares | Mean Square | F Ratio | Prob > F |
|----------|----|----------------|-------------|---------|----------|
| Label    | 5  | 24.261330      | 4.85227     | 54.6315 | <.0001 * |
| Error    | 30 | 2.664542       | 0.08882     |         |          |
| C. Total | 35 | 26.925872      |             |         |          |

#### Means for Oneway Anova

| Level   | Number | Mean    | Std Error | Lower 95% | Upper 95% |
|---------|--------|---------|-----------|-----------|-----------|
| 50nM-NA | 6      | 0.8471  | 0.12167   | 0.599     | 1.096     |
| 5nM-NA  | 6      | -0.4326 | 0.12167   | -0.681    | -0.184    |
| -NA     | 6      | -1.1477 | 0.12167   | -1.396    | -0.899    |
| 50nM+NA | 6      | 1.1520  | 0.12167   | 0.904     | 1.400     |
| 5nM+NA  | 6      | 0.2415  | 0.12167   | -0.007    | 0.490     |
| +NA     | 6      | -0.6604 | 0.12167   | -0.909    | -0.412    |

Std Error uses a pooled estimate of error variance

### Means Comparisons

#### Comparisons with a control using Dunnett's Method

### Oneway Analysis of Cyclic ADP-ribose By Label

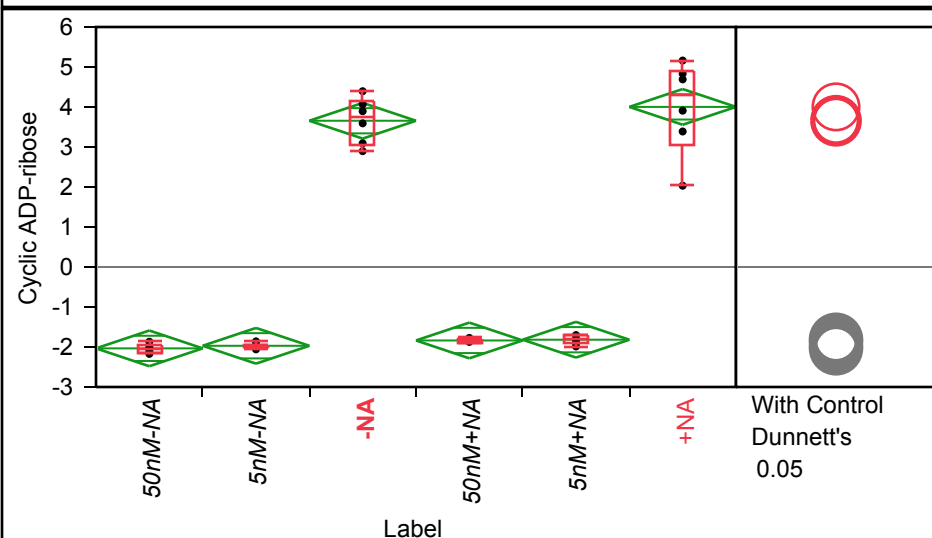

### Quantiles

| Level   | Minimum  | 10%      | 25%      | Median   | 75%      | 90%      | Maximum  |
|---------|----------|----------|----------|----------|----------|----------|----------|
| 50nM-NA | -2.172   | -2.172   | -2.12586 | -2.03842 | -1.95071 | -1.8682  | -1.8682  |
| 5nM-NA  | -2.0585  | -2.0585  | -2.01869 | -1.97391 | -1.92517 | -1.85947 | -1.85947 |
| -NA     | 2.896764 | 2.896764 | 3.043147 | 3.743374 | 4.149887 | 4.394103 | 4.394103 |
| 50nM+NA | -1.88855 | -1.88855 | -1.87866 | -1.84855 | -1.78292 | -1.7729  | -1.7729  |
| 5nM+NA  | -1.98573 | -1.98573 | -1.91724 | -1.80541 | -1.7113  | -1.7022  | -1.7022  |
| +NA     | 2.032615 | 2.032615 | 3.048999 | 4.299434 | 4.915025 | 5.161477 | 5.161477 |

### Oneway Anova

#### Summary of Fit

|                            |          |
|----------------------------|----------|
| Rsquare                    | 0.968536 |
| Adj Rsquare                | 0.963292 |
| Root Mean Square Error     | 0.535179 |
| Mean of Response           | -9.9e-17 |
| Observations (or Sum Wgts) | 36       |

#### Analysis of Variance

| Source   | DF | Sum of Squares | Mean Square | F Ratio  | Prob > F |
|----------|----|----------------|-------------|----------|----------|
| Label    | 5  | 264.50011      | 52.9000     | 184.6963 | <.0001 * |
| Error    | 30 | 8.59249        | 0.2864      |          |          |
| C. Total | 35 | 273.09260      |             |          |          |

#### Means for Oneway Anova

| Level   | Number | Mean    | Std Error | Lower 95% | Upper 95% |
|---------|--------|---------|-----------|-----------|-----------|
| 50nM-NA | 6      | -2.0343 | 0.21849   | -2.480    | -1.588    |
| 5nM-NA  | 6      | -1.9697 | 0.21849   | -2.416    | -1.524    |
| -NA     | 6      | 3.6563  | 0.21849   | 3.210     | 4.103     |
| 50nM+NA | 6      | -1.8367 | 0.21849   | -2.283    | -1.390    |
| 5nM+NA  | 6      | -1.8179 | 0.21849   | -2.264    | -1.372    |
| +NA     | 6      | 4.0023  | 0.21849   | 3.556     | 4.448     |

Std Error uses a pooled estimate of error variance

### Means Comparisons

#### Comparisons with a control using Dunnett's Method

### Oneway Analysis of cyclic-AMP By Label

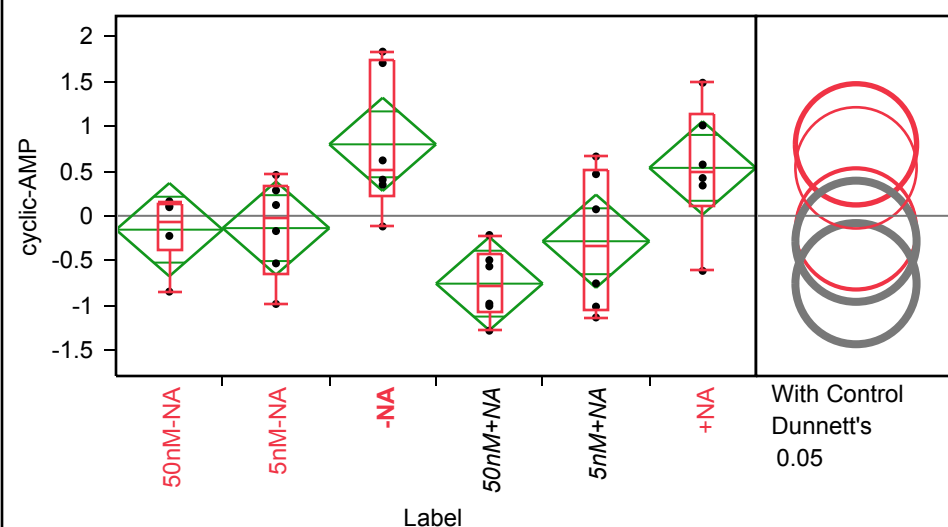

### Quantiles

| Level   | Minimum  | 10%      | 25%      | Median   | 75%      | 90%      | Maximum  |
|---------|----------|----------|----------|----------|----------|----------|----------|
| 50nM-NA | -0.8474  | -0.8474  | -0.38266 | -0.06399 | 0.124588 | 0.161753 | 0.161753 |
| 5nM-NA  | -0.98525 | -0.98525 | -0.64497 | -0.02474 | 0.327129 | 0.456646 | 0.456646 |
| -NA     | -0.11915 | -0.11915 | 0.230988 | 0.511526 | 1.739032 | 1.834879 | 1.834879 |
| 50nM+NA | -1.28413 | -1.28413 | -1.07674 | -0.77366 | -0.4253  | -0.21476 | -0.21476 |
| 5nM+NA  | -1.13627 | -1.13627 | -1.04508 | -0.34127 | 0.51489  | 0.662758 | 0.662758 |
| +NA     | -0.61543 | -0.61543 | 0.100053 | 0.497681 | 1.129356 | 1.487129 | 1.487129 |

### Oneway Anova

#### Summary of Fit

|                            |          |
|----------------------------|----------|
| Rsquare                    | 0.454475 |
| Adj Rsquare                | 0.363555 |
| Root Mean Square Error     | 0.624416 |
| Mean of Response           | -2.5e-17 |
| Observations (or Sum Wgts) | 36       |

#### Analysis of Variance

| Source   | DF | Sum of Squares | Mean Square | F Ratio | Prob > F |
|----------|----|----------------|-------------|---------|----------|
| Label    | 5  | 9.744623       | 1.94892     | 4.9986  | 0.0019 * |
| Error    | 30 | 11.696853      | 0.38990     |         |          |
| C. Total | 35 | 21.441476      |             |         |          |

#### Means for Oneway Anova

| Level   | Number | Mean     | Std Error | Lower 95% | Upper 95% |
|---------|--------|----------|-----------|-----------|-----------|
| 50nM-NA | 6      | -0.15486 | 0.25492   | -0.675    | 0.366     |
| 5nM-NA  | 6      | -0.13761 | 0.25492   | -0.658    | 0.383     |
| -NA     | 6      | 0.79893  | 0.25492   | 0.278     | 1.320     |
| 50nM+NA | 6      | -0.75822 | 0.25492   | -1.279    | -0.238    |
| 5nM+NA  | 6      | -0.28419 | 0.25492   | -0.805    | 0.236     |
| +NA     | 6      | 0.53595  | 0.25492   | 0.015     | 1.057     |

Std Error uses a pooled estimate of error variance

### Means Comparisons

#### Comparisons with a control using Dunnett's Method

### Oneway Analysis of cystathionine By Label

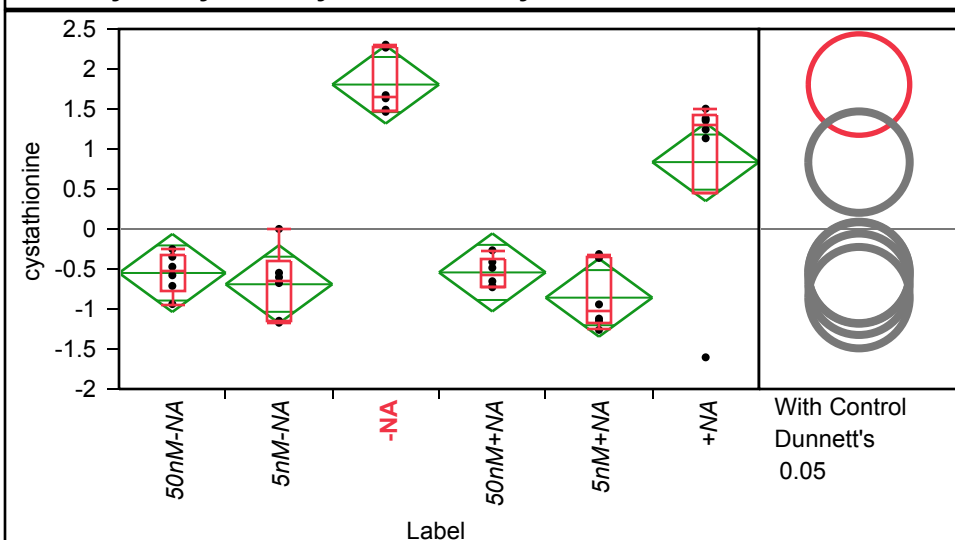

### Quantiles

| Level   | Minimum  | 10%      | 25%      | Median   | 75%      | 90%      | Maximum  |
|---------|----------|----------|----------|----------|----------|----------|----------|
| 50nM-NA | -0.93875 | -0.93875 | -0.76835 | -0.52511 | -0.32306 | -0.25125 | -0.25125 |
| 5nM-NA  | -1.17119 | -1.17119 | -1.15347 | -0.63947 | -0.41047 | 0.000707 | 0.000707 |
| -NA     | 1.46475  | 1.46475  | 1.484678 | 1.65323  | 2.276402 | 2.303491 | 2.303491 |
| 50nM+NA | -0.72832 | -0.72832 | -0.7154  | -0.56901 | -0.37641 | -0.26632 | -0.26632 |
| 5nM+NA  | -1.26106 | -1.26106 | -1.17795 | -1.03138 | -0.34998 | -0.31357 | -0.31357 |
| +NA     | -1.60417 | -1.60417 | 0.449182 | 1.30051  | 1.412565 | 1.503918 | 1.503918 |

### Oneway Anova

#### Summary of Fit

|                            |          |
|----------------------------|----------|
| Rsquare                    | 0.771611 |
| Adj Rsquare                | 0.733546 |
| Root Mean Square Error     | 0.584434 |
| Mean of Response           | 0        |
| Observations (or Sum Wgts) | 36       |

#### Analysis of Variance

| Source   | DF | Sum of Squares | Mean Square | F Ratio | Prob > F |
|----------|----|----------------|-------------|---------|----------|
| Label    | 5  | 34.618988      | 6.92380     | 20.2709 | <.0001 * |
| Error    | 30 | 10.246891      | 0.34156     |         |          |
| C. Total | 35 | 44.865879      |             |         |          |

#### Means for Oneway Anova

| Level   | Number | Mean    | Std Error | Lower 95% | Upper 95% |
|---------|--------|---------|-----------|-----------|-----------|
| 50nM-NA | 6      | -0.5498 | 0.23859   | -1.037    | -0.063    |
| 5nM-NA  | 6      | -0.6908 | 0.23859   | -1.178    | -0.203    |
| -NA     | 6      | 1.8056  | 0.23859   | 1.318     | 2.293     |
| 50nM+NA | 6      | -0.5428 | 0.23859   | -1.030    | -0.056    |
| 5nM+NA  | 6      | -0.8583 | 0.23859   | -1.346    | -0.371    |
| +NA     | 6      | 0.8361  | 0.23859   | 0.349     | 1.323     |

Std Error uses a pooled estimate of error variance

### Means Comparisons

#### Comparisons with a control using Dunnett's Method

### Oneway Analysis of Cysteineglutathione disulfide By Label

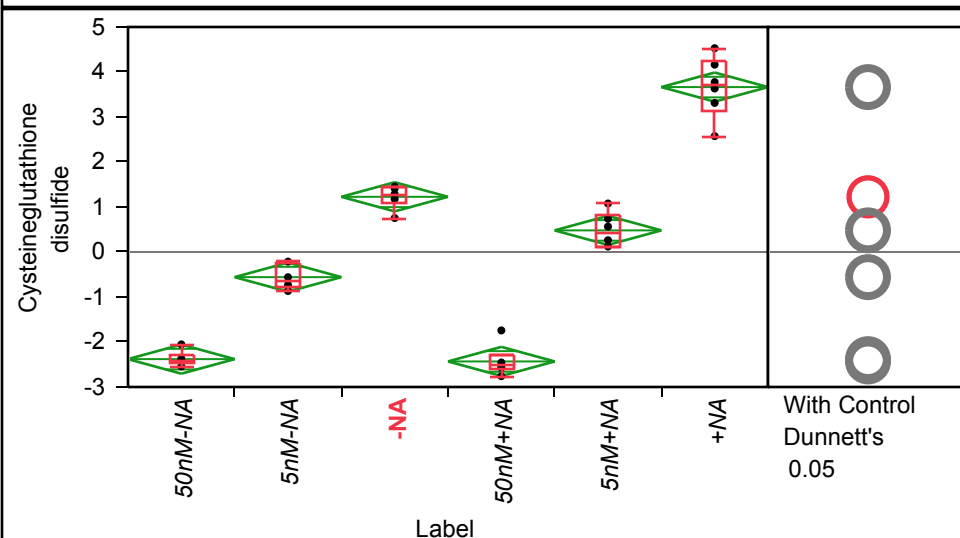

### Quantiles

| Level   | Minimum  | 10%      | 25%      | Median   | 75%      | 90%      | Maximum  |
|---------|----------|----------|----------|----------|----------|----------|----------|
| 50nM-NA | -2.54351 | -2.54351 | -2.4694  | -2.43557 | -2.2913  | -2.05319 | -2.05319 |
| 5nM-NA  | -0.86662 | -0.86662 | -0.77467 | -0.64582 | -0.23064 | -0.2141  | -0.2141  |
| -NA     | 0.754695 | 0.754695 | 1.072733 | 1.278969 | 1.423362 | 1.451949 | 1.451949 |
| 50nM+NA | -2.75962 | -2.75962 | -2.62139 | -2.52932 | -2.27773 | -1.74254 | -1.74254 |
| 5nM+NA  | 0.119035 | 0.119035 | 0.12056  | 0.412715 | 0.82395  | 1.077268 | 1.077268 |
| +NA     | 2.575387 | 2.575387 | 3.128589 | 3.70415  | 4.254489 | 4.528792 | 4.528792 |

### Oneway Anova

#### Summary of Fit

|                            |          |
|----------------------------|----------|
| Rsquare                    | 0.9729   |
| Adj Rsquare                | 0.968384 |
| Root Mean Square Error     | 0.388256 |
| Mean of Response           | 2.778e-9 |
| Observations (or Sum Wgts) | 36       |

#### Analysis of Variance

| Source   | DF | Sum of Squares | Mean Square | F Ratio  | Prob > F |
|----------|----|----------------|-------------|----------|----------|
| Label    | 5  | 162.35235      | 32.4705     | 215.4036 | <.0001 * |
| Error    | 30 | 4.52227        | 0.1507      |          |          |
| C. Total | 35 | 166.87462      |             |          |          |

#### Means for Oneway Anova

| Level   | Number | Mean    | Std Error | Lower 95% | Upper 95% |
|---------|--------|---------|-----------|-----------|-----------|
| 50nM-NA | 6      | -2.3805 | 0.15850   | -2.704    | -2.057    |
| 5nM-NA  | 6      | -0.5588 | 0.15850   | -0.882    | -0.235    |
| -NA     | 6      | 1.2262  | 0.15850   | 0.902     | 1.550     |
| 50nM+NA | 6      | -2.4320 | 0.15850   | -2.756    | -2.108    |
| 5nM+NA  | 6      | 0.4804  | 0.15850   | 0.157     | 0.804     |
| +NA     | 6      | 3.6648  | 0.15850   | 3.341     | 3.988     |

Std Error uses a pooled estimate of error variance

### Means Comparisons

#### Comparisons with a control using Dunnett's Method

### Oneway Analysis of Cystine By Label

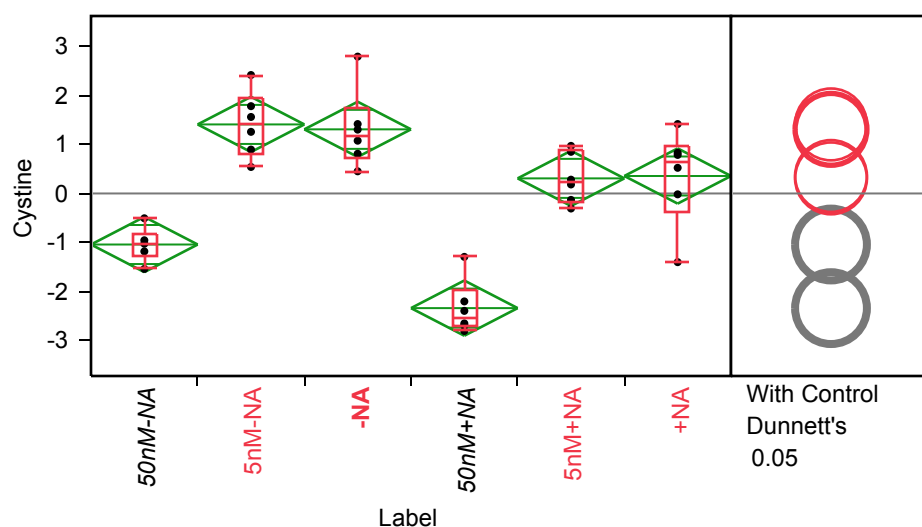

### Quantiles

| Level   | Minimum  | 10%      | 25%      | Median   | 75%      | 90%      | Maximum  |
|---------|----------|----------|----------|----------|----------|----------|----------|
| 50nM-NA | -1.54447 | -1.54447 | -1.27552 | -1.03707 | -0.84593 | -0.50813 | -0.50813 |
| 5nM-NA  | 0.542279 | 0.542279 | 0.809405 | 1.413857 | 1.946733 | 2.425012 | 2.425012 |
| -NA     | 0.453678 | 0.453678 | 0.723268 | 1.19366  | 1.766129 | 2.80153  | 2.80153  |
| 50nM+NA | -2.81499 | -2.81499 | -2.72606 | -2.53218 | -1.98218 | -1.29841 | -1.29841 |
| 5nM+NA  | -0.30813 | -0.30813 | -0.17587 | 0.233285 | 0.883031 | 0.974067 | 0.974067 |
| +NA     | -1.40628 | -1.40628 | -0.36496 | 0.657084 | 0.980455 | 1.420906 | 1.420906 |

### Oneway Anova

#### Summary of Fit

|                            |          |
|----------------------------|----------|
| Rsquare                    | 0.821157 |
| Adj Rsquare                | 0.79135  |
| Root Mean Square Error     | 0.677801 |
| Mean of Response           | -2.8e-10 |
| Observations (or Sum Wgts) | 36       |

#### Analysis of Variance

| Source   | DF | Sum of Squares | Mean Square | F Ratio | Prob > F |
|----------|----|----------------|-------------|---------|----------|
| Label    | 5  | 63.282213      | 12.6564     | 27.5491 | <.0001 * |
| Error    | 30 | 13.782443      | 0.4594      |         |          |
| C. Total | 35 | 77.064656      |             |         |          |

#### Means for Oneway Anova

| Level   | Number | Mean    | Std Error | Lower 95% | Upper 95% |
|---------|--------|---------|-----------|-----------|-----------|
| 50nM-NA | 6      | -1.0452 | 0.27671   | -1.610    | -0.480    |
| 5nM-NA  | 6      | 1.4135  | 0.27671   | 0.848     | 1.979     |
| -NA     | 6      | 1.3128  | 0.27671   | 0.748     | 1.878     |
| 50nM+NA | 6      | -2.3474 | 0.27671   | -2.912    | -1.782    |
| 5nM+NA  | 6      | 0.3089  | 0.27671   | -0.256    | 0.874     |
| +NA     | 6      | 0.3574  | 0.27671   | -0.208    | 0.923     |

Std Error uses a pooled estimate of error variance

### Means Comparisons

#### Comparisons with a control using Dunnett's Method

### Oneway Analysis of cytidine By Label

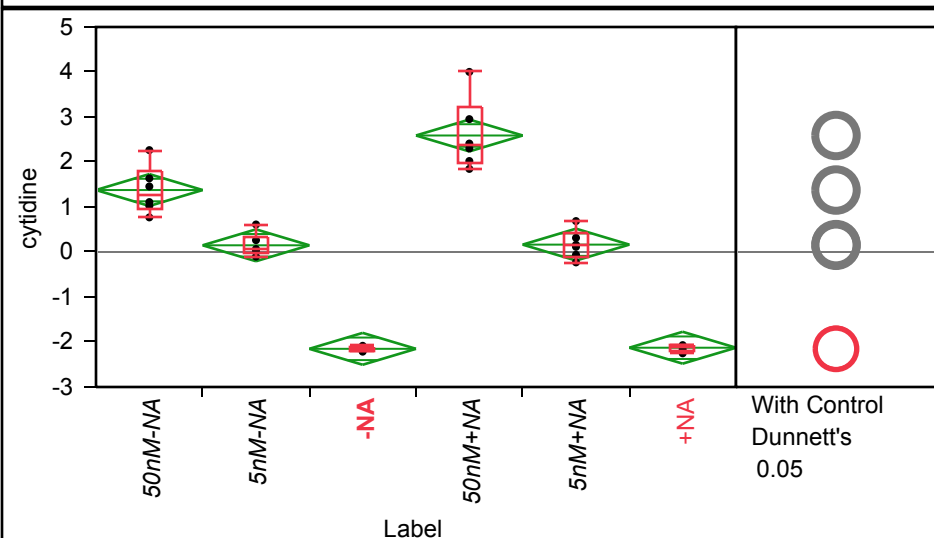

### Quantiles

| Level   | Minimum  | 10%      | 25%      | Median   | 75%      | 90%      | Maximum  |
|---------|----------|----------|----------|----------|----------|----------|----------|
| 50nM-NA | 0.768863 | 0.768863 | 0.961987 | 1.282933 | 1.793094 | 2.263768 | 2.263768 |
| 5nM-NA  | -0.10217 | -0.10217 | -0.01055 | 0.050832 | 0.349909 | 0.611528 | 0.611528 |
| -NA     | -2.21469 | -2.21469 | -2.19591 | -2.16379 | -2.09116 | -2.08499 | -2.08499 |
| 50nM+NA | 1.846733 | 1.846733 | 1.977855 | 2.355754 | 3.214898 | 4.002038 | 4.002038 |
| 5nM+NA  | -0.23075 | -0.23075 | -0.10386 | 0.137178 | 0.407649 | 0.686947 | 0.686947 |
| +NA     | -2.25181 | -2.25181 | -2.18849 | -2.09795 | -2.07577 | -2.06963 | -2.06963 |

### Oneway Anova

#### Summary of Fit

|                            |          |
|----------------------------|----------|
| Rsquare                    | 0.951787 |
| Adj Rsquare                | 0.943751 |
| Root Mean Square Error     | 0.424684 |
| Mean of Response           | 2.78e-10 |
| Observations (or Sum Wgts) | 36       |

#### Analysis of Variance

| Source   | DF | Sum of Squares | Mean Square | F Ratio  | Prob > F |
|----------|----|----------------|-------------|----------|----------|
| Label    | 5  | 106.81361      | 21.3627     | 118.4469 | <.0001 * |
| Error    | 30 | 5.41071        | 0.1804      |          |          |
| C. Total | 35 | 112.22431      |             |          |          |

#### Means for Oneway Anova

| Level   | Number | Mean    | Std Error | Lower 95% | Upper 95% |
|---------|--------|---------|-----------|-----------|-----------|
| 50nM-NA | 6      | 1.3768  | 0.17338   | 1.023     | 1.731     |
| 5nM-NA  | 6      | 0.1490  | 0.17338   | -0.205    | 0.503     |
| -NA     | 6      | -2.1517 | 0.17338   | -2.506    | -1.798    |
| 50nM+NA | 6      | 2.5891  | 0.17338   | 2.235     | 2.943     |
| 5nM+NA  | 6      | 0.1639  | 0.17338   | -0.190    | 0.518     |
| +NA     | 6      | -2.1271 | 0.17338   | -2.481    | -1.773    |

Std Error uses a pooled estimate of error variance

### Means Comparisons

#### Comparisons with a control using Dunnett's Method

### Oneway Analysis of cytosine By Label

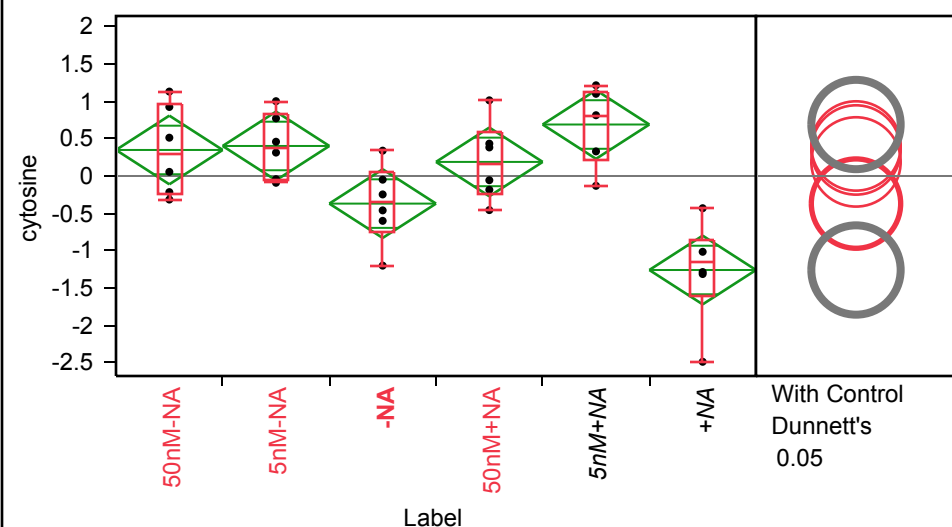

### Quantiles

| Level   | Minimum  | 10%      | 25%      | Median   | 75%      | 90%      | Maximum  |
|---------|----------|----------|----------|----------|----------|----------|----------|
| 50nM-NA | -0.31561 | -0.31561 | -0.24107 | 0.284265 | 0.976821 | 1.131485 | 1.131485 |
| 5nM-NA  | -0.09087 | -0.09087 | -0.05487 | 0.386488 | 0.83011  | 1.002679 | 1.002679 |
| -NA     | -1.20129 | -1.20129 | -0.75113 | -0.35399 | 0.047937 | 0.339415 | 0.339415 |
| 50nM+NA | -0.45695 | -0.45695 | -0.25296 | 0.162965 | 0.579006 | 1.014027 | 1.014027 |
| 5nM+NA  | -0.13165 | -0.13165 | 0.214249 | 0.812554 | 1.13009  | 1.215709 | 1.215709 |
| +NA     | -2.4901  | -2.4901  | -1.60797 | -1.15417 | -0.86986 | -0.43189 | -0.43189 |

### Oneway Anova

#### Summary of Fit

|                            |          |
|----------------------------|----------|
| Rsquare                    | 0.62328  |
| Adj Rsquare                | 0.560494 |
| Root Mean Square Error     | 0.551928 |
| Mean of Response           | -5.6e-10 |
| Observations (or Sum Wgts) | 36       |

#### Analysis of Variance

| Source   | DF | Sum of Squares | Mean Square | F Ratio | Prob > F |
|----------|----|----------------|-------------|---------|----------|
| Label    | 5  | 15.120001      | 3.02400     | 9.9270  | <.0001 * |
| Error    | 30 | 9.138751       | 0.30463     |         |          |
| C. Total | 35 | 24.258752      |             |         |          |

#### Means for Oneway Anova

| Level   | Number | Mean    | Std Error | Lower 95% | Upper 95% |
|---------|--------|---------|-----------|-----------|-----------|
| 50nM-NA | 6      | 0.3489  | 0.22532   | -0.111    | 0.809     |
| 5nM-NA  | 6      | 0.4024  | 0.22532   | -0.058    | 0.863     |
| -NA     | 6      | -0.3700 | 0.22532   | -0.830    | 0.090     |
| 50nM+NA | 6      | 0.1887  | 0.22532   | -0.271    | 0.649     |
| 5nM+NA  | 6      | 0.6900  | 0.22532   | 0.230     | 1.150     |
| +NA     | 6      | -1.2600 | 0.22532   | -1.720    | -0.800    |

Std Error uses a pooled estimate of error variance

### Means Comparisons

#### Comparisons with a control using Dunnett's Method

### Oneway Analysis of dAMP By Label

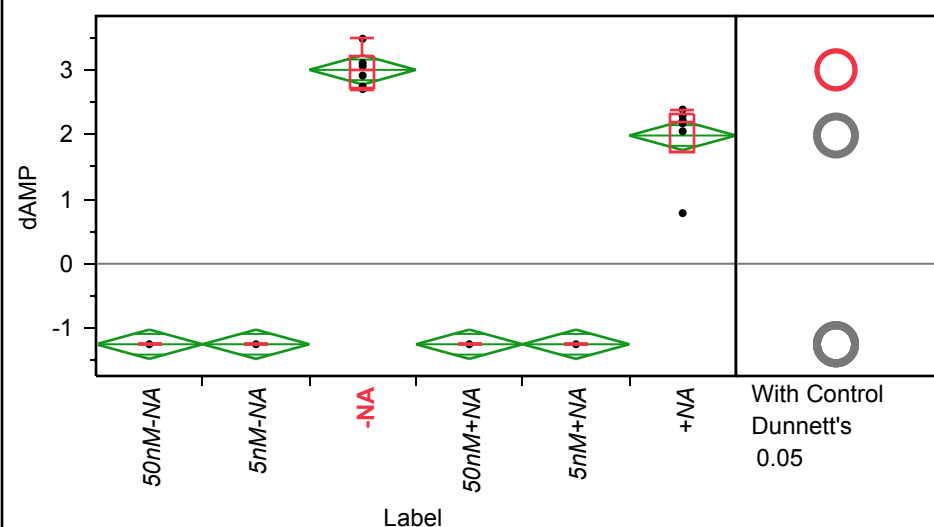

### Quantiles

| Level   | Minimum  | 10%      | 25%      | Median   | 75%      | 90%      | Maximum  |
|---------|----------|----------|----------|----------|----------|----------|----------|
| 50nM-NA | -1.24608 | -1.24608 | -1.24607 | -1.24605 | -1.24599 | -1.24594 | -1.24594 |
| 5nM-NA  | -1.24608 | -1.24608 | -1.24602 | -1.24597 | -1.24593 | -1.24592 | -1.24592 |
| -NA     | 2.701832 | 2.701832 | 2.732119 | 2.984835 | 3.199126 | 3.481271 | 3.481271 |
| 50nM+NA | -1.24608 | -1.24608 | -1.24606 | -1.24605 | -1.24602 | -1.24602 | -1.24602 |
| 5nM+NA  | -1.2461  | -1.2461  | -1.24609 | -1.24605 | -1.246   | -1.24597 | -1.24597 |
| +NA     | 0.782468 | 0.782468 | 1.732472 | 2.19562  | 2.318335 | 2.385869 | 2.385869 |

### Oneway Anova

#### Summary of Fit

|                            |          |
|----------------------------|----------|
| Rsquare                    | 0.981155 |
| Adj Rsquare                | 0.978014 |
| Root Mean Square Error     | 0.271202 |
| Mean of Response           | 5.556e-9 |
| Observations (or Sum Wgts) | 36       |

#### Analysis of Variance

| Source   | DF | Sum of Squares | Mean Square | F Ratio  | Prob > F |
|----------|----|----------------|-------------|----------|----------|
| Label    | 5  | 114.88196      | 22.9764     | 312.3881 | <.0001 * |
| Error    | 30 | 2.20652        | 0.0736      |          |          |
| C. Total | 35 | 117.08849      |             |          |          |

#### Means for Oneway Anova

| Level   | Number | Mean    | Std Error | Lower 95% | Upper 95% |
|---------|--------|---------|-----------|-----------|-----------|
| 50nM-NA | 6      | -1.2460 | 0.11072   | -1.472    | -1.020    |
| 5nM-NA  | 6      | -1.2460 | 0.11072   | -1.472    | -1.020    |
| -NA     | 6      | 3.0000  | 0.11072   | 2.774     | 3.226     |
| 50nM+NA | 6      | -1.2460 | 0.11072   | -1.472    | -1.020    |
| 5nM+NA  | 6      | -1.2460 | 0.11072   | -1.472    | -1.020    |
| +NA     | 6      | 1.9841  | 0.11072   | 1.758     | 2.210     |

Std Error uses a pooled estimate of error variance

### Means Comparisons

#### Comparisons with a control using Dunnett's Method

### Oneway Analysis of dCMP By Label

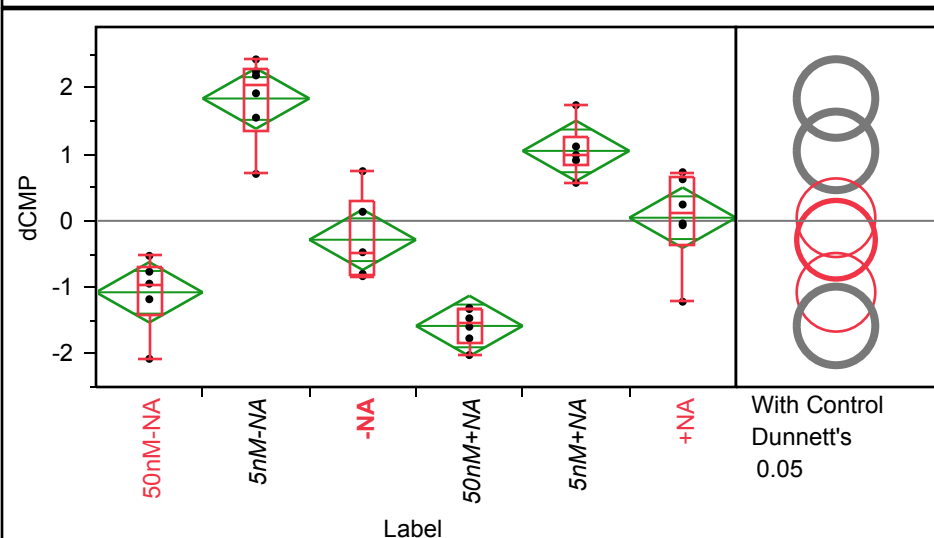

### Quantiles

| Level   | Minimum  | 10%      | 25%      | Median   | 75%      | 90%      | Maximum  |
|---------|----------|----------|----------|----------|----------|----------|----------|
| 50nM-NA | -2.07627 | -2.07627 | -1.40357 | -0.95173 | -0.70564 | -0.52662 | -0.52662 |
| 5nM-NA  | 0.706389 | 0.706389 | 1.340632 | 2.053578 | 2.294051 | 2.429346 | 2.429346 |
| -NA     | -0.83241 | -0.83241 | -0.80683 | -0.47854 | 0.288659 | 0.747092 | 0.747092 |
| 50nM+NA | -2.01978 | -2.01978 | -1.83133 | -1.53    | -1.32301 | -1.31155 | -1.31155 |
| 5nM+NA  | 0.571618 | 0.571618 | 0.825493 | 0.987304 | 1.274819 | 1.740636 | 1.740636 |
| +NA     | -1.21685 | -1.21685 | -0.35306 | 0.103348 | 0.652207 | 0.731706 | 0.731706 |

### Oneway Anova

#### Summary of Fit

|                            |          |
|----------------------------|----------|
| Rsquare                    | 0.847259 |
| Adj Rsquare                | 0.821802 |
| Root Mean Square Error     | 0.544904 |
| Mean of Response           | 2.47e-17 |
| Observations (or Sum Wgts) | 36       |

#### Analysis of Variance

| Source   | DF | Sum of Squares | Mean Square | F Ratio | Prob > F |
|----------|----|----------------|-------------|---------|----------|
| Label    | 5  | 49.410784      | 9.88216     | 33.2822 | <.0001 * |
| Error    | 30 | 8.907618       | 0.29692     |         |          |
| C. Total | 35 | 58.318402      |             |         |          |

#### Means for Oneway Anova

| Level   | Number | Mean    | Std Error | Lower 95% | Upper 95% |
|---------|--------|---------|-----------|-----------|-----------|
| 50nM-NA | 6      | -1.0752 | 0.22246   | -1.529    | -0.621    |
| 5nM-NA  | 6      | 1.8406  | 0.22246   | 1.386     | 2.295     |
| -NA     | 6      | -0.2841 | 0.22246   | -0.738    | 0.170     |
| 50nM+NA | 6      | -1.5811 | 0.22246   | -2.035    | -1.127    |
| 5nM+NA  | 6      | 1.0528  | 0.22246   | 0.598     | 1.507     |
| +NA     | 6      | 0.0470  | 0.22246   | -0.407    | 0.501     |

Std Error uses a pooled estimate of error variance

### Means Comparisons

#### Comparisons with a control using Dunnett's Method

### Oneway Analysis of deoxyadenosine By Label

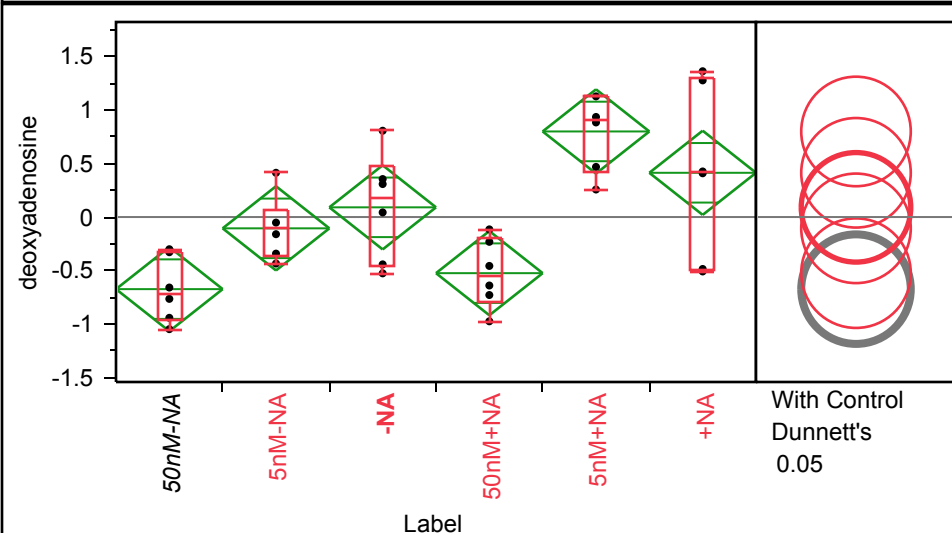

### Quantiles

| Level   | Minimum  | 10%      | 25%      | Median   | 75%      | 90%      | Maximum  |
|---------|----------|----------|----------|----------|----------|----------|----------|
| 50nM-NA | -1.04657 | -1.04657 | -0.96732 | -0.71103 | -0.32137 | -0.30058 | -0.30058 |
| 5nM-NA  | -0.43376 | -0.43376 | -0.36469 | -0.10942 | 0.064264 | 0.413081 | 0.413081 |
| -NA     | -0.52563 | -0.52563 | -0.46293 | 0.175573 | 0.467296 | 0.805535 | 0.805535 |
| 50nM+NA | -0.97343 | -0.97343 | -0.7894  | -0.54784 | -0.20232 | -0.11531 | -0.11531 |
| 5nM+NA  | 0.257093 | 0.257093 | 0.415242 | 0.908729 | 1.125219 | 1.126446 | 1.126446 |
| +NA     | -0.50791 | -0.50791 | -0.49066 | 0.416959 | 1.297201 | 1.361041 | 1.361041 |

### Oneway Anova

#### Summary of Fit

|                            |          |
|----------------------------|----------|
| Rsquare                    | 0.583412 |
| Adj Rsquare                | 0.513981 |
| Root Mean Square Error     | 0.471368 |
| Mean of Response           | 5.56e-10 |
| Observations (or Sum Wgts) | 36       |

#### Analysis of Variance

| Source   | DF | Sum of Squares | Mean Square | F Ratio | Prob > F |
|----------|----|----------------|-------------|---------|----------|
| Label    | 5  | 9.334925       | 1.86699     | 8.4027  | <.0001 * |
| Error    | 30 | 6.665641       | 0.22219     |         |          |
| C. Total | 35 | 16.000566      |             |         |          |

#### Means for Oneway Anova

| Level   | Number | Mean     | Std Error | Lower 95% | Upper 95% |
|---------|--------|----------|-----------|-----------|-----------|
| 50nM-NA | 6      | -0.67307 | 0.19244   | -1.066    | -0.280    |
| 5nM-NA  | 6      | -0.10553 | 0.19244   | -0.499    | 0.287     |
| -NA     | 6      | 0.09059  | 0.19244   | -0.302    | 0.484     |
| 50nM+NA | 6      | -0.52397 | 0.19244   | -0.917    | -0.131    |
| 5nM+NA  | 6      | 0.79896  | 0.19244   | 0.406     | 1.192     |
| +NA     | 6      | 0.41301  | 0.19244   | 0.020     | 0.806     |

Std Error uses a pooled estimate of error variance

### Means Comparisons

#### Comparisons with a control using Dunnett's Method

### Oneway Analysis of Deoxyheptulose-7-phosphate By Label

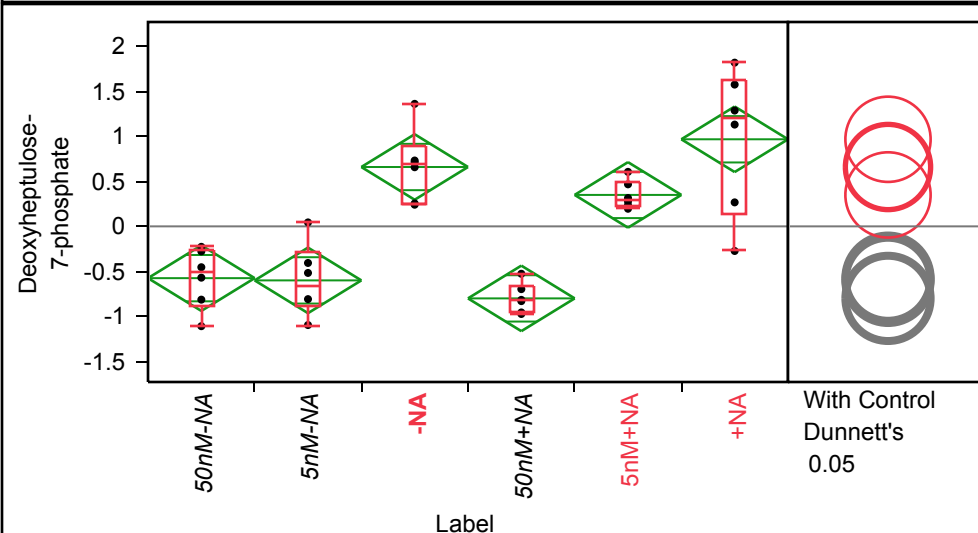

### Quantiles

| Level   | Minimum  | 10%      | 25%      | Median   | 75%      | 90%      | Maximum  |
|---------|----------|----------|----------|----------|----------|----------|----------|
| 50nM-NA | -1.10995 | -1.10995 | -0.88868 | -0.51251 | -0.26521 | -0.22767 | -0.22767 |
| 5nM-NA  | -1.0974  | -1.0974  | -0.88693 | -0.66352 | -0.29429 | 0.043753 | 0.043753 |
| -NA     | 0.240826 | 0.240826 | 0.25146  | 0.68456  | 0.889557 | 1.362124 | 1.362124 |
| 50nM+NA | -0.97426 | -0.97426 | -0.96151 | -0.82431 | -0.65534 | -0.52717 | -0.52717 |
| 5nM+NA  | 0.195796 | 0.195796 | 0.225555 | 0.296387 | 0.50199  | 0.605859 | 0.605859 |
| +NA     | -0.27377 | -0.27377 | 0.131542 | 1.20966  | 1.637324 | 1.820114 | 1.820114 |

### Oneway Anova

#### Summary of Fit

|                            |          |
|----------------------------|----------|
| Rsquare                    | 0.747697 |
| Adj Rsquare                | 0.705646 |
| Root Mean Square Error     | 0.436932 |
| Mean of Response           | -5.6e-10 |
| Observations (or Sum Wgts) | 36       |

#### Analysis of Variance

| Source   | DF | Sum of Squares | Mean Square | F Ratio | Prob > F |
|----------|----|----------------|-------------|---------|----------|
| Label    | 5  | 16.972772      | 3.39455     | 17.7809 | <.0001 * |
| Error    | 30 | 5.727297       | 0.19091     |         |          |
| C. Total | 35 | 22.700069      |             |         |          |

#### Means for Oneway Anova

| Level   | Number | Mean     | Std Error | Lower 95% | Upper 95% |
|---------|--------|----------|-----------|-----------|-----------|
| 50nM-NA | 6      | -0.57588 | 0.17838   | -0.940    | -0.212    |
| 5nM-NA  | 6      | -0.60074 | 0.17838   | -0.965    | -0.236    |
| -NA     | 6      | 0.65985  | 0.17838   | 0.296     | 1.024     |
| 50nM+NA | 6      | -0.80090 | 0.17838   | -1.165    | -0.437    |
| 5nM+NA  | 6      | 0.34954  | 0.17838   | -0.015    | 0.714     |
| +NA     | 6      | 0.96812  | 0.17838   | 0.604     | 1.332     |

Std Error uses a pooled estimate of error variance

### Means Comparisons

#### Comparisons with a control using Dunnett's Method

### Oneway Analysis of deoxyinosine By Label

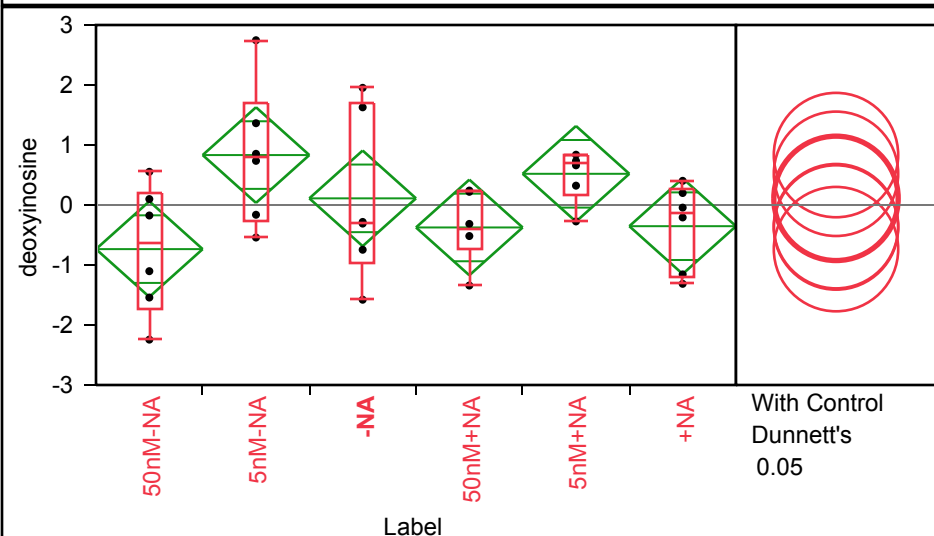

### Quantiles

| Level   | Minimum  | 10%      | 25%      | Median   | 75%      | 90%      | Maximum  |
|---------|----------|----------|----------|----------|----------|----------|----------|
| 50nM-NA | -2.24372 | -2.24372 | -1.71772 | -0.63899 | 0.212386 | 0.55319  | 0.55319  |
| 5nM-NA  | -0.54212 | -0.54212 | -0.25767 | 0.794415 | 1.70885  | 2.746039 | 2.746039 |
| -NA     | -1.5787  | -1.5787  | -0.95402 | -0.29608 | 1.709311 | 1.952691 | 1.952691 |
| 50nM+NA | -1.34218 | -1.34218 | -0.73388 | -0.41636 | 0.224969 | 0.240293 | 0.240293 |
| 5nM+NA  | -0.27349 | -0.27349 | 0.173412 | 0.697726 | 0.837747 | 0.837755 | 0.837755 |
| +NA     | -1.31382 | -1.31382 | -1.19609 | -0.12551 | 0.250591 | 0.402694 | 0.402694 |

### Oneway Anova

#### Summary of Fit

|                            |          |
|----------------------------|----------|
| Rsquare                    | 0.280579 |
| Adj Rsquare                | 0.160676 |
| Root Mean Square Error     | 0.955602 |
| Mean of Response           | -8.3e-10 |
| Observations (or Sum Wgts) | 36       |

#### Analysis of Variance

| Source   | DF | Sum of Squares | Mean Square | F Ratio | Prob > F |
|----------|----|----------------|-------------|---------|----------|
| Label    | 5  | 10.684345      | 2.13687     | 2.3400  | 0.0659   |
| Error    | 30 | 27.395239      | 0.91317     |         |          |
| C. Total | 35 | 38.079584      |             |         |          |

#### Means for Oneway Anova

| Level   | Number | Mean     | Std Error | Lower 95% | Upper 95% |
|---------|--------|----------|-----------|-----------|-----------|
| 50nM-NA | 6      | -0.73535 | 0.39012   | -1.532    | 0.0614    |
| 5nM-NA  | 6      | 0.83217  | 0.39012   | 0.035     | 1.6289    |
| -NA     | 6      | 0.11070  | 0.39012   | -0.686    | 0.9074    |
| 50nM+NA | 6      | -0.37431 | 0.39012   | -1.171    | 0.4224    |
| 5nM+NA  | 6      | 0.51997  | 0.39012   | -0.277    | 1.3167    |
| +NA     | 6      | -0.35319 | 0.39012   | -1.150    | 0.4436    |

Std Error uses a pooled estimate of error variance

### Means Comparisons

#### Comparisons with a control using Dunnett's Method

### Oneway Analysis of deoxyribose-phosphate By Label

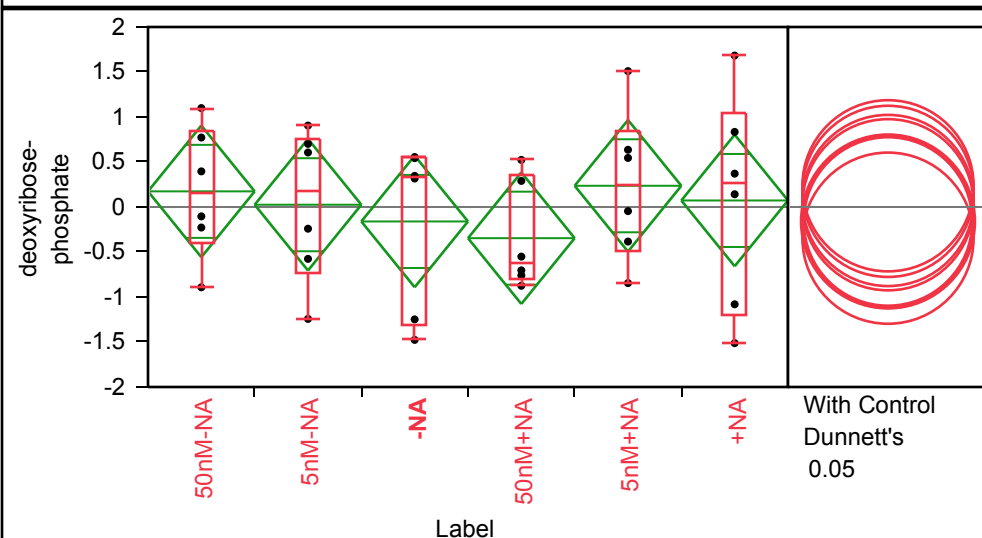

### Quantiles

| Level   | Minimum  | 10%      | 25%      | Median   | 75%      | 90%      | Maximum  |
|---------|----------|----------|----------|----------|----------|----------|----------|
| 50nM-NA | -0.89205 | -0.89205 | -0.39408 | 0.145815 | 0.853665 | 1.098976 | 1.098976 |
| 5nM-NA  | -1.24351 | -1.24351 | -0.74304 | 0.182169 | 0.752217 | 0.904672 | 0.904672 |
| -NA     | -1.47648 | -1.47648 | -1.30566 | 0.331155 | 0.546203 | 0.555417 | 0.555417 |
| 50nM+NA | -0.87525 | -0.87525 | -0.78939 | -0.62765 | 0.348161 | 0.523297 | 0.523297 |
| 5nM+NA  | -0.8456  | -0.8456  | -0.49957 | 0.249627 | 0.854214 | 1.509638 | 1.509638 |
| +NA     | -1.5127  | -1.5127  | -1.18904 | 0.255952 | 1.046393 | 1.68222  | 1.68222  |

### Oneway Anova

#### Summary of Fit

|                            |          |
|----------------------------|----------|
| Rsquare                    | 0.058197 |
| Adj Rsquare                | -0.09877 |
| Root Mean Square Error     | 0.876697 |
| Mean of Response           | 2.78e-10 |
| Observations (or Sum Wgts) | 36       |

#### Analysis of Variance

| Source   | DF | Sum of Squares | Mean Square | F Ratio | Prob > F |
|----------|----|----------------|-------------|---------|----------|
| Label    | 5  | 1.424815       | 0.284963    | 0.3708  | 0.8646   |
| Error    | 30 | 23.057928      | 0.768598    |         |          |
| C. Total | 35 | 24.482743      |             |         |          |

#### Means for Oneway Anova

| Level   | Number | Mean     | Std Error | Lower 95% | Upper 95% |
|---------|--------|----------|-----------|-----------|-----------|
| 50nM-NA | 6      | 0.17373  | 0.35791   | -0.557    | 0.90468   |
| 5nM-NA  | 6      | 0.02511  | 0.35791   | -0.706    | 0.75606   |
| -NA     | 6      | -0.16072 | 0.35791   | -0.892    | 0.57023   |
| 50nM+NA | 6      | -0.34637 | 0.35791   | -1.077    | 0.38458   |
| 5nM+NA  | 6      | 0.23580  | 0.35791   | -0.495    | 0.96675   |
| +NA     | 6      | 0.07245  | 0.35791   | -0.658    | 0.80340   |

Std Error uses a pooled estimate of error variance

### Means Comparisons

#### Comparisons with a control using Dunnett's Method

### Oneway Analysis of D-erythrose-4-phosphate By Label

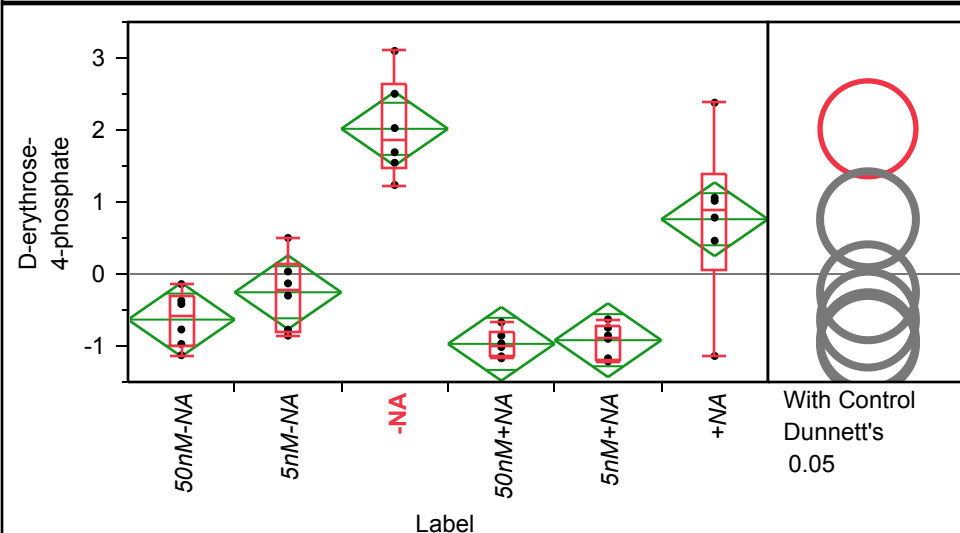

### Quantiles

| Level   | Minimum  | 10%      | 25%      | Median   | 75%      | 90%      | Maximum  |
|---------|----------|----------|----------|----------|----------|----------|----------|
| 50nM-NA | -1.1282  | -1.1282  | -1.01166 | -0.59371 | -0.31306 | -0.14052 | -0.14052 |
| 5nM-NA  | -0.85632 | -0.85632 | -0.79407 | -0.21515 | 0.151681 | 0.501459 | 0.501459 |
| -NA     | 1.235995 | 1.235995 | 1.467615 | 1.858588 | 2.65158  | 3.098131 | 3.098131 |
| 50nM+NA | -1.17135 | -1.17135 | -1.15065 | -0.98949 | -0.8103  | -0.67137 | -0.67137 |
| 5nM+NA  | -1.2138  | -1.2138  | -1.18226 | -0.87802 | -0.71673 | -0.62931 | -0.62931 |
| +NA     | -1.13857 | -1.13857 | 0.062101 | 0.900166 | 1.389521 | 2.379116 | 2.379116 |

### Oneway Anova

#### Summary of Fit

|                            |          |
|----------------------------|----------|
| Rsquare                    | 0.785483 |
| Adj Rsquare                | 0.74973  |
| Root Mean Square Error     | 0.61377  |
| Mean of Response           | 5.56e-10 |
| Observations (or Sum Wgts) | 36       |

#### Analysis of Variance

| Source   | DF | Sum of Squares | Mean Square | F Ratio | Prob > F |
|----------|----|----------------|-------------|---------|----------|
| Label    | 5  | 41.381630      | 8.27633     | 21.9698 | <.0001 * |
| Error    | 30 | 11.301420      | 0.37671     |         |          |
| C. Total | 35 | 52.683050      |             |         |          |

#### Means for Oneway Anova

| Level   | Number | Mean    | Std Error | Lower 95% | Upper 95% |
|---------|--------|---------|-----------|-----------|-----------|
| 50nM-NA | 6      | -0.6333 | 0.25057   | -1.145    | -0.122    |
| 5nM-NA  | 6      | -0.2539 | 0.25057   | -0.766    | 0.258     |
| -NA     | 6      | 2.0165  | 0.25057   | 1.505     | 2.528     |
| 50nM+NA | 6      | -0.9703 | 0.25057   | -1.482    | -0.459    |
| 5nM+NA  | 6      | -0.9195 | 0.25057   | -1.431    | -0.408    |
| +NA     | 6      | 0.7605  | 0.25057   | 0.249     | 1.272     |

Std Error uses a pooled estimate of error variance

### Means Comparisons

#### Comparisons with a control using Dunnett's Method

### Oneway Analysis of dGDP By Label

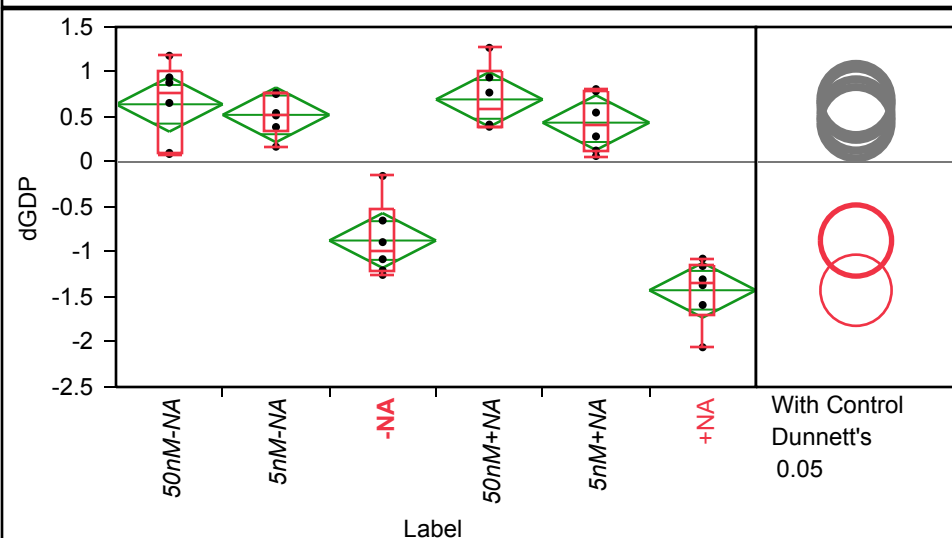

### Quantiles

| Level   | Minimum  | 10%      | 25%      | Median   | 75%      | 90%      | Maximum  |
|---------|----------|----------|----------|----------|----------|----------|----------|
| 50nM-NA | 0.088755 | 0.088755 | 0.097955 | 0.768651 | 1.000195 | 1.180446 | 1.180446 |
| 5nM-NA  | 0.169532 | 0.169532 | 0.333779 | 0.530678 | 0.758143 | 0.767669 | 0.767669 |
| -NA     | -1.25486 | -1.25486 | -1.2173  | -0.98511 | -0.52657 | -0.15514 | -0.15514 |
| 50nM+NA | 0.386117 | 0.386117 | 0.390083 | 0.593485 | 1.021414 | 1.268711 | 1.268711 |
| 5nM+NA  | 0.066291 | 0.066291 | 0.112002 | 0.416843 | 0.792208 | 0.809808 | 0.809808 |
| +NA     | -2.05872 | -2.05872 | -1.70621 | -1.33645 | -1.13521 | -1.07385 | -1.07385 |

### Oneway Anova

#### Summary of Fit

|                            |          |
|----------------------------|----------|
| Rsquare                    | 0.861995 |
| Adj Rsquare                | 0.838994 |
| Root Mean Square Error     | 0.364623 |
| Mean of Response           | -5.6e-10 |
| Observations (or Sum Wgts) | 36       |

#### Analysis of Variance

| Source   | DF | Sum of Squares | Mean Square | F Ratio | Prob > F |
|----------|----|----------------|-------------|---------|----------|
| Label    | 5  | 24.912530      | 4.98251     | 37.4765 | <.0001 * |
| Error    | 30 | 3.988501       | 0.13295     |         |          |
| C. Total | 35 | 28.901031      |             |         |          |

#### Means for Oneway Anova

| Level   | Number | Mean    | Std Error | Lower 95% | Upper 95% |
|---------|--------|---------|-----------|-----------|-----------|
| 50nM-NA | 6      | 0.6413  | 0.14886   | 0.337     | 0.945     |
| 5nM-NA  | 6      | 0.5237  | 0.14886   | 0.220     | 0.828     |
| -NA     | 6      | -0.8726 | 0.14886   | -1.177    | -0.569    |
| 50nM+NA | 6      | 0.6954  | 0.14886   | 0.391     | 0.999     |
| 5nM+NA  | 6      | 0.4372  | 0.14886   | 0.133     | 0.741     |
| +NA     | 6      | -1.4250 | 0.14886   | -1.729    | -1.121    |

Std Error uses a pooled estimate of error variance

### Means Comparisons

#### Comparisons with a control using Dunnett's Method

### Oneway Analysis of D-gluconate By Label

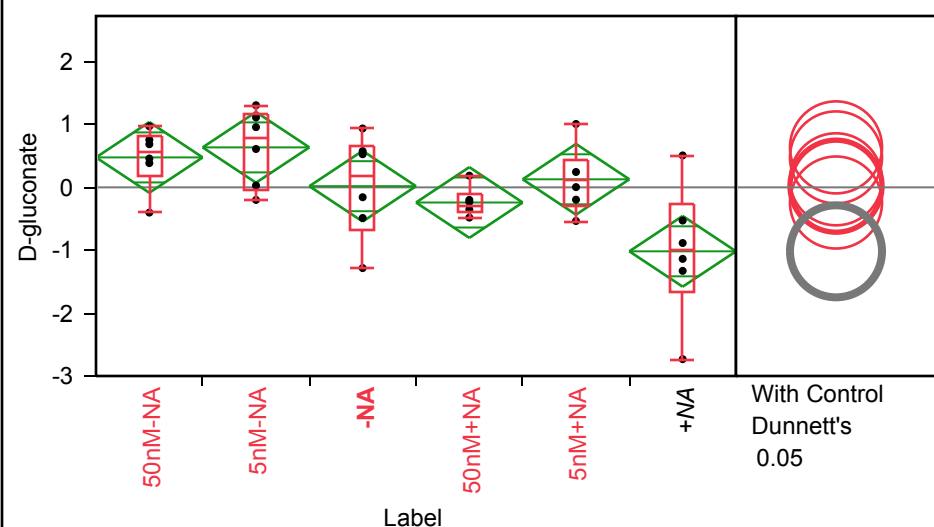

### Quantiles

| Level   | Minimum  | 10%      | 25%      | Median   | 75%      | 90%      | Maximum  |
|---------|----------|----------|----------|----------|----------|----------|----------|
| 50nM-NA | -0.4012  | -0.4012  | 0.188891 | 0.572243 | 0.809922 | 0.971483 | 0.971483 |
| 5nM-NA  | -0.19993 | -0.19993 | -0.02824 | 0.783601 | 1.160399 | 1.305663 | 1.305663 |
| -NA     | -1.28392 | -1.28392 | -0.6863  | 0.184807 | 0.666171 | 0.936187 | 0.936187 |
| 50nM+NA | -0.48089 | -0.48089 | -0.39413 | -0.29315 | -0.1033  | 0.185715 | 0.185715 |
| 5nM+NA  | -0.53527 | -0.53527 | -0.28076 | 0.123632 | 0.435295 | 1.00767  | 1.00767  |
| +NA     | -2.73212 | -2.73212 | -1.67931 | -1.0112  | -0.26901 | 0.507537 | 0.507537 |

### Oneway Anova

#### Summary of Fit

|                            |          |
|----------------------------|----------|
| Rsquare                    | 0.433398 |
| Adj Rsquare                | 0.338964 |
| Root Mean Square Error     | 0.674551 |
| Mean of Response           | 0        |
| Observations (or Sum Wgts) | 36       |

#### Analysis of Variance

| Source   | DF | Sum of Squares | Mean Square | F Ratio | Prob > F |
|----------|----|----------------|-------------|---------|----------|
| Label    | 5  | 10.441417      | 2.08828     | 4.5894  | 0.0032 * |
| Error    | 30 | 13.650578      | 0.45502     |         |          |
| C. Total | 35 | 24.091995      |             |         |          |

#### Means for Oneway Anova

| Level   | Number | Mean    | Std Error | Lower 95% | Upper 95% |
|---------|--------|---------|-----------|-----------|-----------|
| 50nM-NA | 6      | 0.4761  | 0.27538   | -0.086    | 1.038     |
| 5nM-NA  | 6      | 0.6356  | 0.27538   | 0.073     | 1.198     |
| -NA     | 6      | 0.0185  | 0.27538   | -0.544    | 0.581     |
| 50nM+NA | 6      | -0.2411 | 0.27538   | -0.803    | 0.321     |
| 5nM+NA  | 6      | 0.1280  | 0.27538   | -0.434    | 0.690     |
| +NA     | 6      | -1.0172 | 0.27538   | -1.580    | -0.455    |

Std Error uses a pooled estimate of error variance

### Means Comparisons

#### Comparisons with a control using Dunnett's Method

### Oneway Analysis of D-glyceraldehyde-3-phosphate By Label

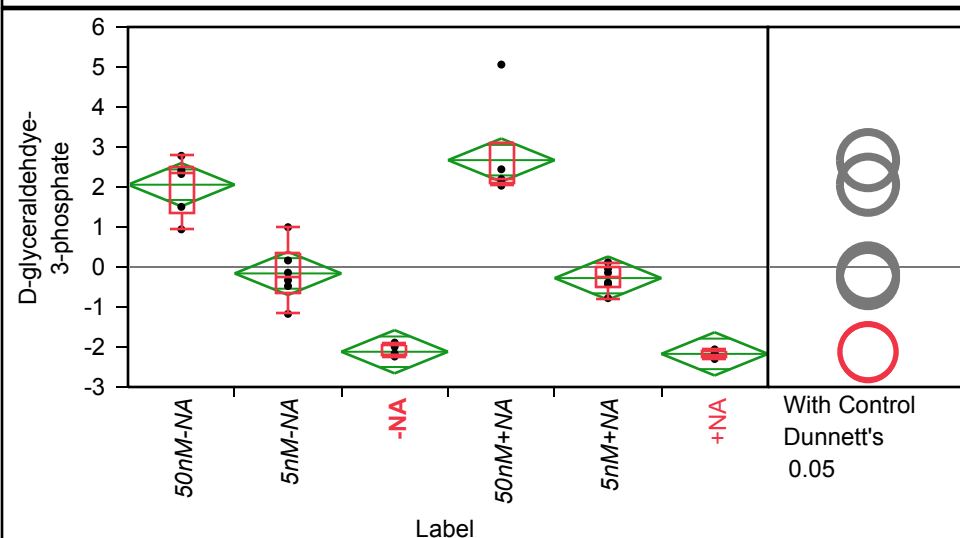

### Quantiles

| Level   | Minimum  | 10%      | 25%      | Median   | 75%      | 90%      | Maximum  |
|---------|----------|----------|----------|----------|----------|----------|----------|
| 50nM-NA | 0.940811 | 0.940811 | 1.362641 | 2.348663 | 2.51284  | 2.779431 | 2.779431 |
| 5nM-NA  | -1.17182 | -1.17182 | -0.65098 | -0.23659 | 0.371801 | 0.994755 | 0.994755 |
| -NA     | -2.23808 | -2.23808 | -2.225   | -2.18478 | -1.96814 | -1.89042 | -1.89042 |
| 50nM+NA | 2.033092 | 2.033092 | 2.096857 | 2.187855 | 3.096649 | 5.060323 | 5.060323 |
| 5nM+NA  | -0.77896 | -0.77896 | -0.51949 | -0.26674 | 0.001863 | 0.116704 | 0.116704 |
| +NA     | -2.29982 | -2.29982 | -2.23524 | -2.17963 | -2.08959 | -2.06079 | -2.06079 |

### Oneway Anova

#### Summary of Fit

|                            |          |
|----------------------------|----------|
| Rsquare                    | 0.908004 |
| Adj Rsquare                | 0.892672 |
| Root Mean Square Error     | 0.647346 |
| Mean of Response           | 2.78e-10 |
| Observations (or Sum Wgts) | 36       |

#### Analysis of Variance

| Source   | DF | Sum of Squares | Mean Square | F Ratio | Prob > F |
|----------|----|----------------|-------------|---------|----------|
| Label    | 5  | 124.08356      | 24.8167     | 59.2203 | <.0001 * |
| Error    | 30 | 12.57172       | 0.4191      |         |          |
| C. Total | 35 | 136.65528      |             |         |          |

#### Means for Oneway Anova

| Level   | Number | Mean    | Std Error | Lower 95% | Upper 95% |
|---------|--------|---------|-----------|-----------|-----------|
| 50nM-NA | 6      | 2.0575  | 0.26428   | 1.518     | 2.597     |
| 5nM-NA  | 6      | -0.1606 | 0.26428   | -0.700    | 0.379     |
| -NA     | 6      | -2.1188 | 0.26428   | -2.659    | -1.579    |
| 50nM+NA | 6      | 2.6716  | 0.26428   | 2.132     | 3.211     |
| 5nM+NA  | 6      | -0.2775 | 0.26428   | -0.817    | 0.262     |
| +NA     | 6      | -2.1721 | 0.26428   | -2.712    | -1.632    |

Std Error uses a pooled estimate of error variance

### Means Comparisons

#### Comparisons with a control using Dunnett's Method

### Oneway Analysis of dGTP By Label

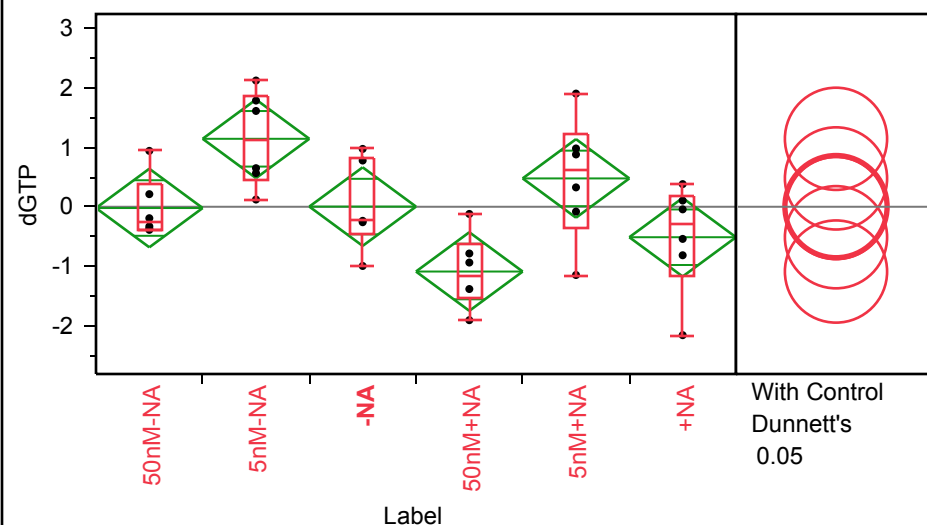

### Quantiles

| Level   | Minimum  | 10%      | 25%      | Median   | 75%      | 90%      | Maximum  |
|---------|----------|----------|----------|----------|----------|----------|----------|
| 50nM-NA | -0.38935 | -0.38935 | -0.37483 | -0.26165 | 0.395085 | 0.942199 | 0.942199 |
| 5nM-NA  | 0.121861 | 0.121861 | 0.456449 | 1.132992 | 1.875055 | 2.128342 | 2.128342 |
| -NA     | -0.99813 | -0.99813 | -0.44489 | -0.23941 | 0.828566 | 0.975298 | 0.975298 |
| 50nM+NA | -1.91208 | -1.91208 | -1.53055 | -1.16371 | -0.621   | -0.12105 | -0.12105 |
| 5nM+NA  | -1.15057 | -1.15057 | -0.34863 | 0.604312 | 1.214293 | 1.907911 | 1.907911 |
| +NA     | -2.16481 | -2.16481 | -1.15439 | -0.29264 | 0.174208 | 0.381906 | 0.381906 |

### Oneway Anova

#### Summary of Fit

|                            |          |
|----------------------------|----------|
| Rsquare                    | 0.487299 |
| Adj Rsquare                | 0.401848 |
| Root Mean Square Error     | 0.794226 |
| Mean of Response           | -2.8e-10 |
| Observations (or Sum Wgts) | 36       |

#### Analysis of Variance

| Source   | DF | Sum of Squares | Mean Square | F Ratio | Prob > F |
|----------|----|----------------|-------------|---------|----------|
| Label    | 5  | 17.986250      | 3.59725     | 5.7027  | 0.0008 * |
| Error    | 30 | 18.923870      | 0.63080     |         |          |
| C. Total | 35 | 36.910120      |             |         |          |

#### Means for Oneway Anova

| Level   | Number | Mean    | Std Error | Lower 95% | Upper 95% |
|---------|--------|---------|-----------|-----------|-----------|
| 50nM-NA | 6      | -0.0213 | 0.32424   | -0.683    | 0.641     |
| 5nM-NA  | 6      | 1.1458  | 0.32424   | 0.484     | 1.808     |
| -NA     | 6      | 0.0029  | 0.32424   | -0.659    | 0.665     |
| 50nM+NA | 6      | -1.0919 | 0.32424   | -1.754    | -0.430    |
| 5nM+NA  | 6      | 0.4780  | 0.32424   | -0.184    | 1.140     |
| +NA     | 6      | -0.5135 | 0.32424   | -1.176    | 0.149     |

Std Error uses a pooled estimate of error variance

### Means Comparisons

#### Comparisons with a control using Dunnett's Method

### Oneway Analysis of dihydroxy-acetone-phosphate By Label

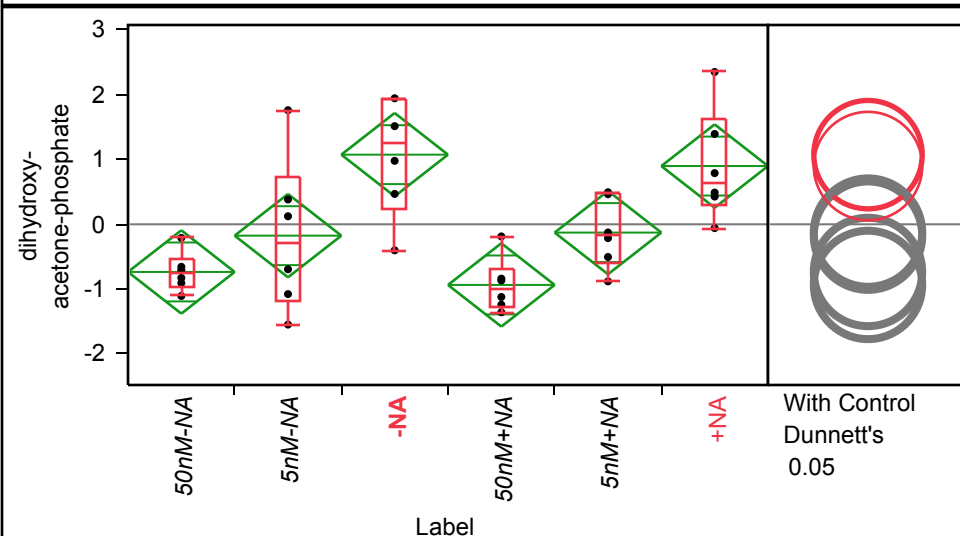

### Quantiles

| Level   | Minimum  | 10%      | 25%      | Median   | 75%      | 90%      | Maximum  |
|---------|----------|----------|----------|----------|----------|----------|----------|
| 50nM-NA | -1.10598 | -1.10598 | -0.95604 | -0.76625 | -0.54455 | -0.21006 | -0.21006 |
| 5nM-NA  | -1.54722 | -1.54722 | -1.19439 | -0.28511 | 0.727289 | 1.76064  | 1.76064  |
| -NA     | -0.40119 | -0.40119 | 0.251516 | 1.246775 | 1.941798 | 1.944512 | 1.944512 |
| 50nM+NA | -1.35776 | -1.35776 | -1.27009 | -0.9941  | -0.67565 | -0.18686 | -0.18686 |
| 5nM+NA  | -0.88076 | -0.88076 | -0.59842 | -0.16952 | 0.471642 | 0.494408 | 0.494408 |
| +NA     | -0.05883 | -0.05883 | 0.306372 | 0.639444 | 1.633046 | 2.350306 | 2.350306 |

### Oneway Anova

#### Summary of Fit

|                            |          |
|----------------------------|----------|
| Rsquare                    | 0.535405 |
| Adj Rsquare                | 0.457972 |
| Root Mean Square Error     | 0.77092  |
| Mean of Response           | -2.8e-10 |
| Observations (or Sum Wgts) | 36       |

#### Analysis of Variance

| Source   | DF | Sum of Squares | Mean Square | F Ratio | Prob > F |
|----------|----|----------------|-------------|---------|----------|
| Label    | 5  | 20.546938      | 4.10939     | 6.9145  | 0.0002 * |
| Error    | 30 | 17.829507      | 0.59432     |         |          |
| C. Total | 35 | 38.376445      |             |         |          |

#### Means for Oneway Anova

| Level   | Number | Mean    | Std Error | Lower 95% | Upper 95% |
|---------|--------|---------|-----------|-----------|-----------|
| 50nM-NA | 6      | -0.7351 | 0.31473   | -1.378    | -0.092    |
| 5nM-NA  | 6      | -0.1751 | 0.31473   | -0.818    | 0.468     |
| -NA     | 6      | 1.0745  | 0.31473   | 0.432     | 1.717     |
| 50nM+NA | 6      | -0.9354 | 0.31473   | -1.578    | -0.293    |
| 5nM+NA  | 6      | -0.1276 | 0.31473   | -0.770    | 0.515     |
| +NA     | 6      | 0.8987  | 0.31473   | 0.256     | 1.541     |

Std Error uses a pooled estimate of error variance

### Means Comparisons

#### Comparisons with a control using Dunnett's Method

### Oneway Analysis of dimethylglycine By Label

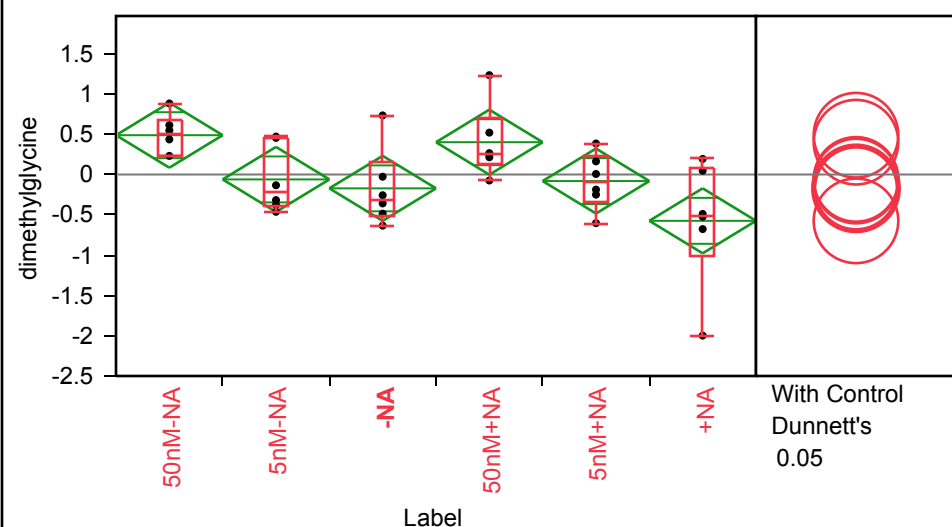

### Quantiles

| Level   | Minimum  | 10%      | 25%      | Median   | 75%      | 90%      | Maximum  |
|---------|----------|----------|----------|----------|----------|----------|----------|
| 50nM-NA | 0.21976  | 0.21976  | 0.228211 | 0.490754 | 0.679666 | 0.881557 | 0.881557 |
| 5nM-NA  | -0.46277 | -0.46277 | -0.39808 | -0.2256  | 0.458566 | 0.47065  | 0.47065  |
| -NA     | -0.63447 | -0.63447 | -0.52319 | -0.30808 | 0.162693 | 0.733288 | 0.733288 |
| 50nM+NA | -0.07434 | -0.07434 | 0.14188  | 0.256931 | 0.697742 | 1.232406 | 1.232406 |
| 5nM+NA  | -0.60319 | -0.60319 | -0.33833 | -0.09049 | 0.21831  | 0.384377 | 0.384377 |
| +NA     | -1.99817 | -1.99817 | -1.00735 | -0.50655 | 0.083327 | 0.193121 | 0.193121 |

### Oneway Anova

#### Summary of Fit

|                            |          |
|----------------------------|----------|
| Rsquare                    | 0.396623 |
| Adj Rsquare                | 0.29606  |
| Root Mean Square Error     | 0.483623 |
| Mean of Response           | 8.33e-11 |
| Observations (or Sum Wgts) | 36       |

#### Analysis of Variance

| Source   | DF | Sum of Squares | Mean Square | F Ratio | Prob > F |
|----------|----|----------------|-------------|---------|----------|
| Label    | 5  | 4.612367       | 0.922473    | 3.9440  | 0.0072 * |
| Error    | 30 | 7.016729       | 0.233891    |         |          |
| C. Total | 35 | 11.629096      |             |         |          |

#### Means for Oneway Anova

| Level   | Number | Mean     | Std Error | Lower 95% | Upper 95% |
|---------|--------|----------|-----------|-----------|-----------|
| 50nM-NA | 6      | 0.48770  | 0.19744   | 0.0845    | 0.8909    |
| 5nM-NA  | 6      | -0.06088 | 0.19744   | -0.4641   | 0.3423    |
| -NA     | 6      | -0.17182 | 0.19744   | -0.5750   | 0.2314    |
| 50nM+NA | 6      | 0.40090  | 0.19744   | -0.0023   | 0.8041    |
| 5nM+NA  | 6      | -0.08115 | 0.19744   | -0.4844   | 0.3221    |
| +NA     | 6      | -0.57475 | 0.19744   | -0.9780   | -0.1715   |

Std Error uses a pooled estimate of error variance

### Means Comparisons

#### Comparisons with a control using Dunnett's Method

### Oneway Analysis of DL-Pipecolic acid By Label

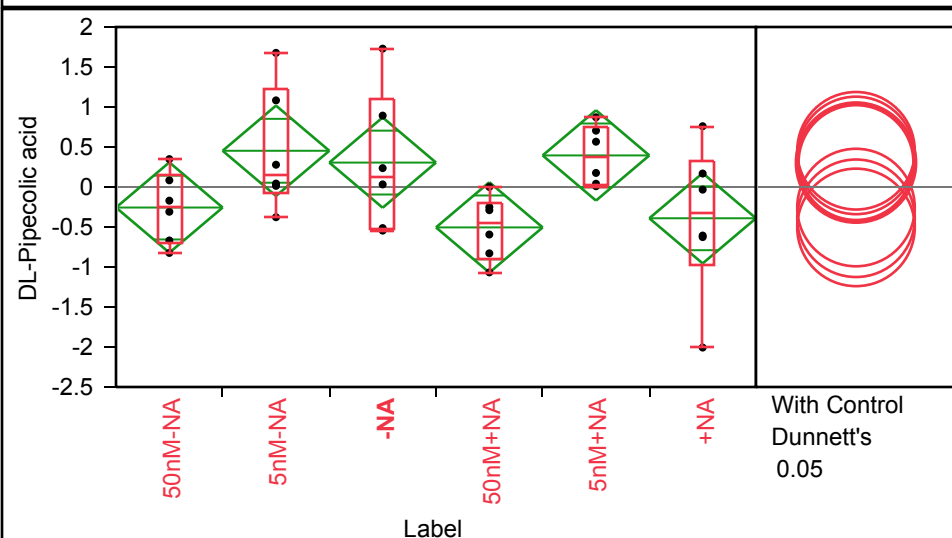

### Quantiles

| Level   | Minimum  | 10%      | 25%      | Median   | 75%      | 90%      | Maximum  |
|---------|----------|----------|----------|----------|----------|----------|----------|
| 50nM-NA | -0.824   | -0.824   | -0.70746 | -0.24008 | 0.149892 | 0.34863  | 0.34863  |
| 5nM-NA  | -0.37774 | -0.37774 | -0.08397 | 0.160451 | 1.231251 | 1.676498 | 1.676498 |
| -NA     | -0.54485 | -0.54485 | -0.52146 | 0.134136 | 1.101557 | 1.729192 | 1.729192 |
| 50nM+NA | -1.06713 | -1.06713 | -0.8889  | -0.44201 | -0.18773 | 0.000941 | 0.000941 |
| 5nM+NA  | 0.010117 | 0.010117 | 0.032988 | 0.37091  | 0.74603  | 0.871402 | 0.871402 |
| +NA     | -2.00694 | -2.00694 | -0.97139 | -0.31997 | 0.316237 | 0.759495 | 0.759495 |

### Oneway Anova

#### Summary of Fit

|                            |          |
|----------------------------|----------|
| Rsquare                    | 0.288124 |
| Adj Rsquare                | 0.169477 |
| Root Mean Square Error     | 0.67706  |
| Mean of Response           | -2.8e-11 |
| Observations (or Sum Wgts) | 36       |

#### Analysis of Variance

| Source   | DF | Sum of Squares | Mean Square | F Ratio | Prob > F |
|----------|----|----------------|-------------|---------|----------|
| Label    | 5  | 5.566091       | 1.11322     | 2.4284  | 0.0581   |
| Error    | 30 | 13.752325      | 0.45841     |         |          |
| C. Total | 35 | 19.318416      |             |         |          |

#### Means for Oneway Anova

| Level   | Number | Mean     | Std Error | Lower 95% | Upper 95% |
|---------|--------|----------|-----------|-----------|-----------|
| 50nM-NA | 6      | -0.25675 | 0.27641   | -0.821    | 0.3078    |
| 5nM-NA  | 6      | 0.45274  | 0.27641   | -0.112    | 1.0172    |
| -NA     | 6      | 0.30521  | 0.27641   | -0.259    | 0.8697    |
| 50nM+NA | 6      | -0.50506 | 0.27641   | -1.070    | 0.0594    |
| 5nM+NA  | 6      | 0.39470  | 0.27641   | -0.170    | 0.9592    |
| +NA     | 6      | -0.39085 | 0.27641   | -0.955    | 0.1737    |

Std Error uses a pooled estimate of error variance

### Means Comparisons

#### Comparisons with a control using Dunnett's Method

### Oneway Analysis of D-Mannitol By Label

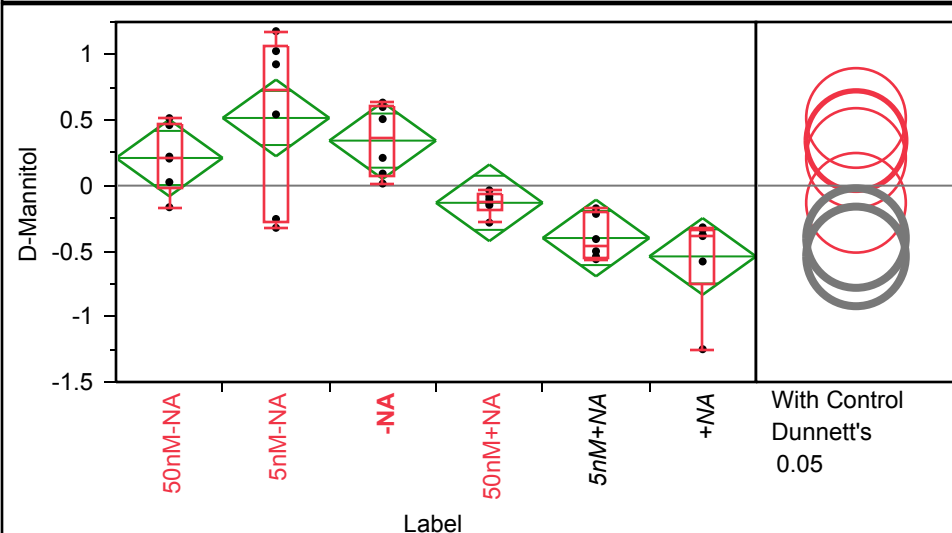

### Quantiles

| Level   | Minimum  | 10%      | 25%      | Median   | 75%      | 90%      | Maximum  |
|---------|----------|----------|----------|----------|----------|----------|----------|
| 50nM-NA | -0.16513 | -0.16513 | -0.02111 | 0.214091 | 0.475676 | 0.515389 | 0.515389 |
| 5nM-NA  | -0.32218 | -0.32218 | -0.27161 | 0.735415 | 1.065787 | 1.179949 | 1.179949 |
| -NA     | 0.015846 | 0.015846 | 0.073012 | 0.360265 | 0.608914 | 0.63426  | 0.63426  |
| 50nM+NA | -0.28265 | -0.28265 | -0.18256 | -0.1188  | -0.0702  | -0.03574 | -0.03574 |
| 5nM+NA  | -0.56205 | -0.56205 | -0.54663 | -0.45448 | -0.20507 | -0.17333 | -0.17333 |
| +NA     | -1.24965 | -1.24965 | -0.74689 | -0.38053 | -0.33133 | -0.3186  | -0.3186  |

### Oneway Anova

#### Summary of Fit

|                            |          |
|----------------------------|----------|
| Rsquare                    | 0.594023 |
| Adj Rsquare                | 0.52636  |
| Root Mean Square Error     | 0.350711 |
| Mean of Response           | 8.33e-10 |
| Observations (or Sum Wgts) | 36       |

#### Analysis of Variance

| Source   | DF | Sum of Squares | Mean Square | F Ratio | Prob > F |
|----------|----|----------------|-------------|---------|----------|
| Label    | 5  | 5.3991069      | 1.07982     | 8.7792  | <.0001 * |
| Error    | 30 | 3.6899429      | 0.12300     |         |          |
| C. Total | 35 | 9.0890498      |             |         |          |

#### Means for Oneway Anova

| Level   | Number | Mean     | Std Error | Lower 95% | Upper 95% |
|---------|--------|----------|-----------|-----------|-----------|
| 50nM-NA | 6      | 0.21130  | 0.14318   | -0.0811   | 0.5037    |
| 5nM-NA  | 6      | 0.51693  | 0.14318   | 0.2245    | 0.8093    |
| -NA     | 6      | 0.34386  | 0.14318   | 0.0515    | 0.6363    |
| 50nM+NA | 6      | -0.13114 | 0.14318   | -0.4235   | 0.1613    |
| 5nM+NA  | 6      | -0.40025 | 0.14318   | -0.6927   | -0.1078   |
| +NA     | 6      | -0.54070 | 0.14318   | -0.8331   | -0.2483   |

Std Error uses a pooled estimate of error variance

### Means Comparisons

#### Comparisons with a control using Dunnett's Method

### Oneway Analysis of Sedoheptulose-1-7-bisphosphate By Label

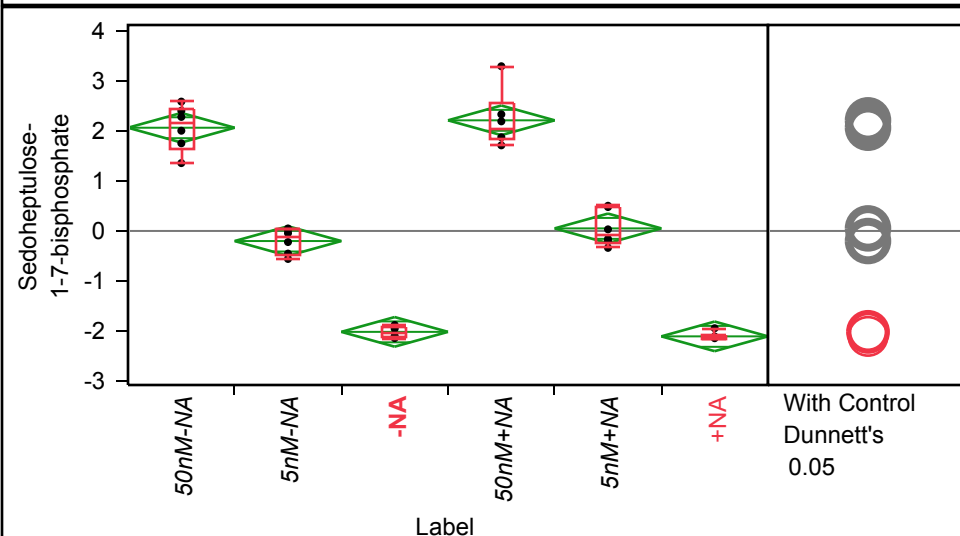

### Quantiles

| Level   | Minimum  | 10%      | 25%      | Median   | 75%      | 90%      | Maximum  |
|---------|----------|----------|----------|----------|----------|----------|----------|
| 50nM-NA | 1.35624  | 1.35624  | 1.652999 | 2.141451 | 2.448232 | 2.585122 | 2.585122 |
| 5nM-NA  | -0.55963 | -0.55963 | -0.47954 | -0.13338 | 0.027501 | 0.049673 | 0.049673 |
| -NA     | -2.14222 | -2.14222 | -2.11876 | -2.02626 | -1.90811 | -1.87901 | -1.87901 |
| 50nM+NA | 1.711324 | 1.711324 | 1.82937  | 2.032054 | 2.571414 | 3.292073 | 3.292073 |
| 5nM+NA  | -0.33809 | -0.33809 | -0.2405  | -0.06383 | 0.48433  | 0.503066 | 0.503066 |
| +NA     | -2.16324 | -2.16324 | -2.16323 | -2.13043 | -2.06838 | -1.94476 | -1.94476 |

### Oneway Anova

#### Summary of Fit

|                            |          |
|----------------------------|----------|
| Rsquare                    | 0.965665 |
| Adj Rsquare                | 0.959943 |
| Root Mean Square Error     | 0.354747 |
| Mean of Response           | -2.8e-10 |
| Observations (or Sum Wgts) | 36       |

#### Analysis of Variance

| Source   | DF | Sum of Squares | Mean Square | F Ratio  | Prob > F |
|----------|----|----------------|-------------|----------|----------|
| Label    | 5  | 106.18309      | 21.2366     | 168.7512 | <.0001 * |
| Error    | 30 | 3.77537        | 0.1258      |          |          |
| C. Total | 35 | 109.95846      |             |          |          |

#### Means for Oneway Anova

| Level   | Number | Mean    | Std Error | Lower 95% | Upper 95% |
|---------|--------|---------|-----------|-----------|-----------|
| 50nM-NA | 6      | 2.0631  | 0.14483   | 1.767     | 2.359     |
| 5nM-NA  | 6      | -0.2016 | 0.14483   | -0.497    | 0.094     |
| -NA     | 6      | -2.0171 | 0.14483   | -2.313    | -1.721    |
| 50nM+NA | 6      | 2.2112  | 0.14483   | 1.915     | 2.507     |
| 5nM+NA  | 6      | 0.0512  | 0.14483   | -0.245    | 0.347     |
| +NA     | 6      | -2.1069 | 0.14483   | -2.403    | -1.811    |

Std Error uses a pooled estimate of error variance

### Means Comparisons

#### Comparisons with a control using Dunnett's Method

### Oneway Analysis of FAD By Label

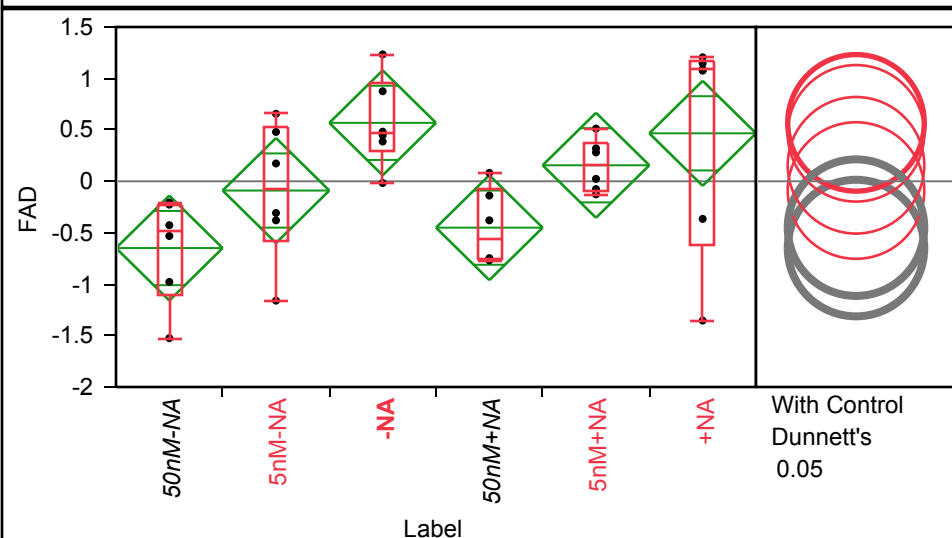

### Quantiles

| Level   | Minimum  | 10%      | 25%      | Median   | 75%      | 90%      | Maximum  |
|---------|----------|----------|----------|----------|----------|----------|----------|
| 50nM-NA | -1.52517 | -1.52517 | -1.11496 | -0.47941 | -0.22173 | -0.20625 | -0.20625 |
| 5nM-NA  | -1.16044 | -1.16044 | -0.57498 | -0.06752 | 0.523634 | 0.656017 | 0.656017 |
| -NA     | -0.01682 | -0.01682 | 0.285811 | 0.464987 | 0.964827 | 1.233442 | 1.233442 |
| 50nM+NA | -0.76902 | -0.76902 | -0.75531 | -0.56368 | -0.08382 | 0.081409 | 0.081409 |
| 5nM+NA  | -0.12692 | -0.12692 | -0.08866 | 0.152078 | 0.367934 | 0.512256 | 0.512256 |
| +NA     | -1.35419 | -1.35419 | -0.61264 | 1.082648 | 1.161463 | 1.205267 | 1.205267 |

### Oneway Anova

#### Summary of Fit

|                            |          |
|----------------------------|----------|
| Rsquare                    | 0.389986 |
| Adj Rsquare                | 0.288317 |
| Root Mean Square Error     | 0.611975 |
| Mean of Response           | 2.47e-17 |
| Observations (or Sum Wgts) | 36       |

#### Analysis of Variance

| Source   | DF | Sum of Squares | Mean Square | F Ratio | Prob > F |
|----------|----|----------------|-------------|---------|----------|
| Label    | 5  | 7.182881       | 1.43658     | 3.8358  | 0.0083 * |
| Error    | 30 | 11.235411      | 0.37451     |         |          |
| C. Total | 35 | 18.418293      |             |         |          |

#### Means for Oneway Anova

| Level   | Number | Mean     | Std Error | Lower 95% | Upper 95% |
|---------|--------|----------|-----------|-----------|-----------|
| 50nM-NA | 6      | -0.64922 | 0.24984   | -1.159    | -0.139    |
| 5nM-NA  | 6      | -0.08997 | 0.24984   | -0.600    | 0.420     |
| -NA     | 6      | 0.56810  | 0.24984   | 0.058     | 1.078     |
| 50nM+NA | 6      | -0.45077 | 0.24984   | -0.961    | 0.059     |
| 5nM+NA  | 6      | 0.15557  | 0.24984   | -0.355    | 0.666     |
| +NA     | 6      | 0.46630  | 0.24984   | -0.044    | 0.977     |

Std Error uses a pooled estimate of error variance

### Means Comparisons

#### Comparisons with a control using Dunnett's Method

### Oneway Analysis of folate By Label

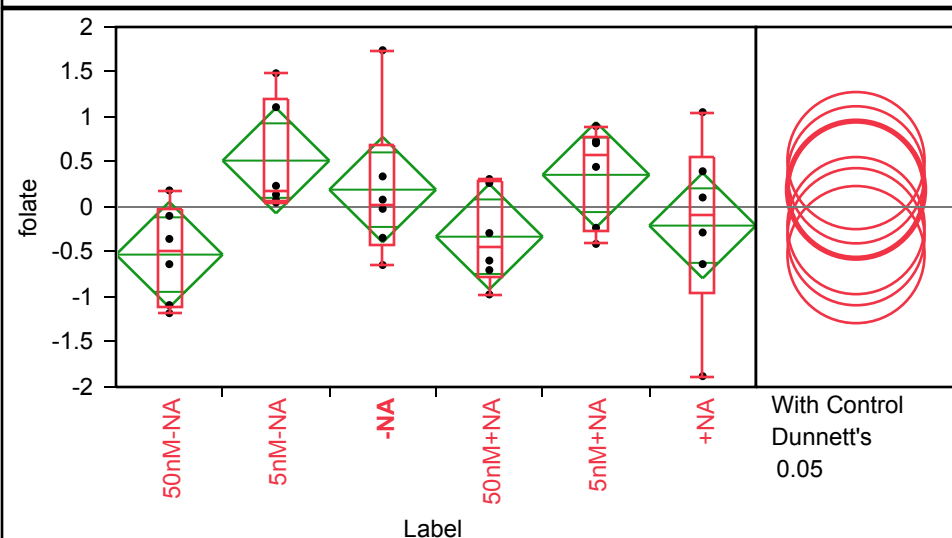

### Quantiles

| Level   | Minimum  | 10%      | 25%      | Median   | 75%      | 90%      | Maximum  |
|---------|----------|----------|----------|----------|----------|----------|----------|
| 50nM-NA | -1.17971 | -1.17971 | -1.11262 | -0.49488 | -0.02765 | 0.184424 | 0.184424 |
| 5nM-NA  | 0.049748 | 0.049748 | 0.068396 | 0.186619 | 1.203456 | 1.485941 | 1.485941 |
| -NA     | -0.64481 | -0.64481 | -0.41791 | 0.030622 | 0.69023  | 1.74183  | 1.74183  |
| 50nM+NA | -0.97168 | -0.97168 | -0.76849 | -0.44247 | 0.278064 | 0.310688 | 0.310688 |
| 5nM+NA  | -0.40994 | -0.40994 | -0.27575 | 0.576967 | 0.774992 | 0.898184 | 0.898184 |
| +NA     | -1.87953 | -1.87953 | -0.94584 | -0.08873 | 0.56142  | 1.053888 | 1.053888 |

### Oneway Anova

#### Summary of Fit

|                            |          |
|----------------------------|----------|
| Rsquare                    | 0.259022 |
| Adj Rsquare                | 0.135525 |
| Root Mean Square Error     | 0.702267 |
| Mean of Response           | -1.2e-17 |
| Observations (or Sum Wgts) | 36       |

#### Analysis of Variance

| Source   | DF | Sum of Squares | Mean Square | F Ratio | Prob > F |
|----------|----|----------------|-------------|---------|----------|
| Label    | 5  | 5.171975       | 1.03439     | 2.0974  | 0.0933   |
| Error    | 30 | 14.795361      | 0.49318     |         |          |
| C. Total | 35 | 19.967336      |             |         |          |

#### Means for Oneway Anova

| Level   | Number | Mean     | Std Error | Lower 95% | Upper 95% |
|---------|--------|----------|-----------|-----------|-----------|
| 50nM-NA | 6      | -0.52894 | 0.28670   | -1.114    | 0.0566    |
| 5nM-NA  | 6      | 0.51547  | 0.28670   | -0.070    | 1.1010    |
| -NA     | 6      | 0.19261  | 0.28670   | -0.393    | 0.7781    |
| 50nM+NA | 6      | -0.32992 | 0.28670   | -0.915    | 0.2556    |
| 5nM+NA  | 6      | 0.35751  | 0.28670   | -0.228    | 0.9430    |
| +NA     | 6      | -0.20674 | 0.28670   | -0.792    | 0.3788    |

Std Error uses a pooled estimate of error variance

### Means Comparisons

#### Comparisons with a control using Dunnett's Method

### Oneway Analysis of fructose-1,6-bisphosphate By Label

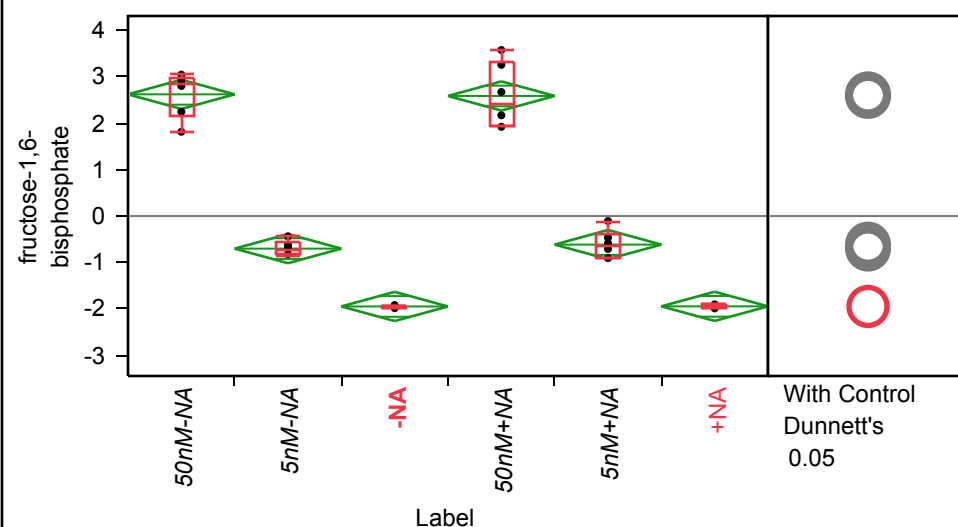

### Quantiles

| Level   | Minimum  | 10%      | 25%      | Median   | 75%      | 90%      | Maximum  |
|---------|----------|----------|----------|----------|----------|----------|----------|
| 50nM-NA | 1.815708 | 1.815708 | 2.138996 | 2.838381 | 2.97503  | 3.04779  | 3.04779  |
| 5nM-NA  | -0.84018 | -0.84018 | -0.82789 | -0.74361 | -0.57611 | -0.43621 | -0.43621 |
| -NA     | -1.98441 | -1.98441 | -1.96101 | -1.94617 | -1.93544 | -1.91772 | -1.91772 |
| 50nM+NA | 1.922608 | 1.922608 | 1.923234 | 2.422012 | 3.339519 | 3.576942 | 3.576942 |
| 5nM+NA  | -0.91928 | -0.91928 | -0.90987 | -0.64571 | -0.37616 | -0.10794 | -0.10794 |
| +NA     | -1.98973 | -1.98973 | -1.9781  | -1.94882 | -1.90814 | -1.90398 | -1.90398 |

### Oneway Anova

#### Summary of Fit

|                            |          |
|----------------------------|----------|
| Rsquare                    | 0.968682 |
| Adj Rsquare                | 0.963462 |
| Root Mean Square Error     | 0.37742  |
| Mean of Response           | 5.556e-9 |
| Observations (or Sum Wgts) | 36       |

#### Analysis of Variance

| Source   | DF | Sum of Squares | Mean Square | F Ratio  | Prob > F |
|----------|----|----------------|-------------|----------|----------|
| Label    | 5  | 132.17793      | 26.4356     | 185.5838 | <.0001 * |
| Error    | 30 | 4.27337        | 0.1424      |          |          |
| C. Total | 35 | 136.45130      |             |          |          |

#### Means for Oneway Anova

| Level   | Number | Mean    | Std Error | Lower 95% | Upper 95% |
|---------|--------|---------|-----------|-----------|-----------|
| 50nM-NA | 6      | 2.6230  | 0.15408   | 2.308     | 2.938     |
| 5nM-NA  | 6      | -0.7017 | 0.15408   | -1.016    | -0.387    |
| -NA     | 6      | -1.9482 | 0.15408   | -2.263    | -1.633    |
| 50nM+NA | 6      | 2.5879  | 0.15408   | 2.273     | 2.903     |
| 5nM+NA  | 6      | -0.6152 | 0.15408   | -0.930    | -0.300    |
| +NA     | 6      | -1.9459 | 0.15408   | -2.261    | -1.631    |

Std Error uses a pooled estimate of error variance

### Means Comparisons

#### Comparisons with a control using Dunnett's Method

### Oneway Analysis of fructose-6-phosphate By Label

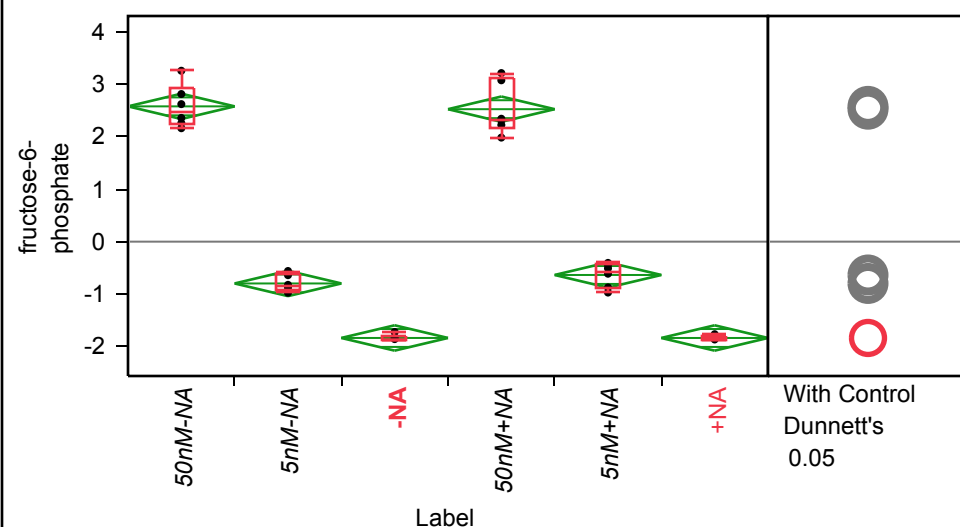

### Quantiles

| Level   | Minimum  | 10%      | 25%      | Median   | 75%      | 90%      | Maximum  |
|---------|----------|----------|----------|----------|----------|----------|----------|
| 50nM-NA | 2.161456 | 2.161456 | 2.234418 | 2.48937  | 2.923656 | 3.256588 | 3.256588 |
| 5nM-NA  | -0.97397 | -0.97397 | -0.93481 | -0.84297 | -0.61878 | -0.5594  | -0.5594  |
| -NA     | -1.87167 | -1.87167 | -1.87163 | -1.86426 | -1.79384 | -1.72155 | -1.72155 |
| 50nM+NA | 1.982973 | 1.982973 | 2.162828 | 2.326146 | 3.109268 | 3.212324 | 3.212324 |
| 5nM+NA  | -0.96968 | -0.96968 | -0.89642 | -0.55999 | -0.43378 | -0.405   | -0.405   |
| +NA     | -1.87155 | -1.87155 | -1.87101 | -1.84975 | -1.7961  | -1.76374 | -1.76374 |

### Oneway Anova

#### Summary of Fit

|                            |          |
|----------------------------|----------|
| Rsquare                    | 0.980236 |
| Adj Rsquare                | 0.976942 |
| Root Mean Square Error     | 0.289562 |
| Mean of Response           | 9.87e-17 |
| Observations (or Sum Wgts) | 36       |

#### Analysis of Variance

| Source   | DF | Sum of Squares | Mean Square | F Ratio  | Prob > F |
|----------|----|----------------|-------------|----------|----------|
| Label    | 5  | 124.75501      | 24.9510     | 297.5802 | <.0001 * |
| Error    | 30 | 2.51539        | 0.0838      |          |          |
| C. Total | 35 | 127.27040      |             |          |          |

#### Means for Oneway Anova

| Level   | Number | Mean    | Std Error | Lower 95% | Upper 95% |
|---------|--------|---------|-----------|-----------|-----------|
| 50nM-NA | 6      | 2.5780  | 0.11821   | 2.337     | 2.819     |
| 5nM-NA  | 6      | -0.7966 | 0.11821   | -1.038    | -0.555    |
| -NA     | 6      | -1.8352 | 0.11821   | -2.077    | -1.594    |
| 50nM+NA | 6      | 2.5242  | 0.11821   | 2.283     | 2.766     |
| 5nM+NA  | 6      | -0.6350 | 0.11821   | -0.876    | -0.394    |
| +NA     | 6      | -1.8354 | 0.11821   | -2.077    | -1.594    |

Std Error uses a pooled estimate of error variance

### Means Comparisons

#### Comparisons with a control using Dunnett's Method

### Oneway Analysis of fumarate By Label

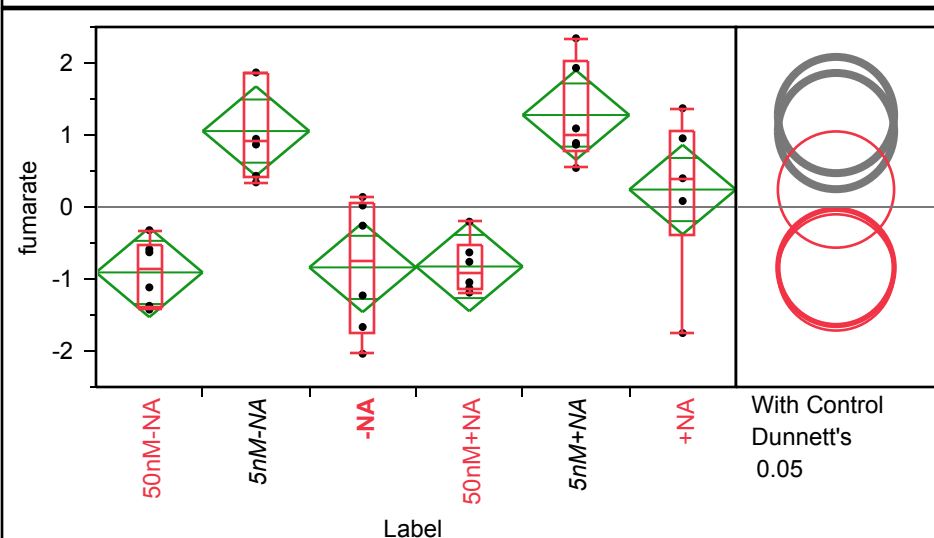

### Quantiles

| Level   | Minimum  | 10%      | 25%      | Median   | 75%      | 90%      | Maximum  |
|---------|----------|----------|----------|----------|----------|----------|----------|
| 50nM-NA | -1.42502 | -1.42502 | -1.3857  | -0.87287 | -0.52057 | -0.32228 | -0.32228 |
| 5nM-NA  | 0.342189 | 0.342189 | 0.409723 | 0.907196 | 1.868651 | 1.868702 | 1.868702 |
| -NA     | -2.03832 | -2.03832 | -1.75967 | -0.74407 | 0.050336 | 0.139156 | 0.139156 |
| 50nM+NA | -1.18908 | -1.18908 | -1.14217 | -0.9038  | -0.52398 | -0.20416 | -0.20416 |
| 5nM+NA  | 0.542694 | 0.542694 | 0.785049 | 0.989884 | 2.034817 | 2.343568 | 2.343568 |
| +NA     | -1.75068 | -1.75068 | -0.37518 | 0.397556 | 1.058552 | 1.371861 | 1.371861 |

### Oneway Anova

#### Summary of Fit

|                            |          |
|----------------------------|----------|
| Rsquare                    | 0.644253 |
| Adj Rsquare                | 0.584962 |
| Root Mean Square Error     | 0.744144 |
| Mean of Response           | 1.23e-17 |
| Observations (or Sum Wgts) | 36       |

#### Analysis of Variance

| Source   | DF | Sum of Squares | Mean Square | F Ratio | Prob > F |
|----------|----|----------------|-------------|---------|----------|
| Label    | 5  | 30.085104      | 6.01702     | 10.8659 | <.0001 * |
| Error    | 30 | 16.612525      | 0.55375     |         |          |
| C. Total | 35 | 46.697629      |             |         |          |

#### Means for Oneway Anova

| Level   | Number | Mean    | Std Error | Lower 95% | Upper 95% |
|---------|--------|---------|-----------|-----------|-----------|
| 50nM-NA | 6      | -0.9087 | 0.30380   | -1.529    | -0.288    |
| 5nM-NA  | 6      | 1.0544  | 0.30380   | 0.434     | 1.675     |
| -NA     | 6      | -0.8389 | 0.30380   | -1.459    | -0.218    |
| 50nM+NA | 6      | -0.8263 | 0.30380   | -1.447    | -0.206    |
| 5nM+NA  | 6      | 1.2773  | 0.30380   | 0.657     | 1.898     |
| +NA     | 6      | 0.2423  | 0.30380   | -0.378    | 0.863     |

Std Error uses a pooled estimate of error variance

### Means Comparisons

#### Comparisons with a control using Dunnett's Method

### Oneway Analysis of Geranyl-PP By Label

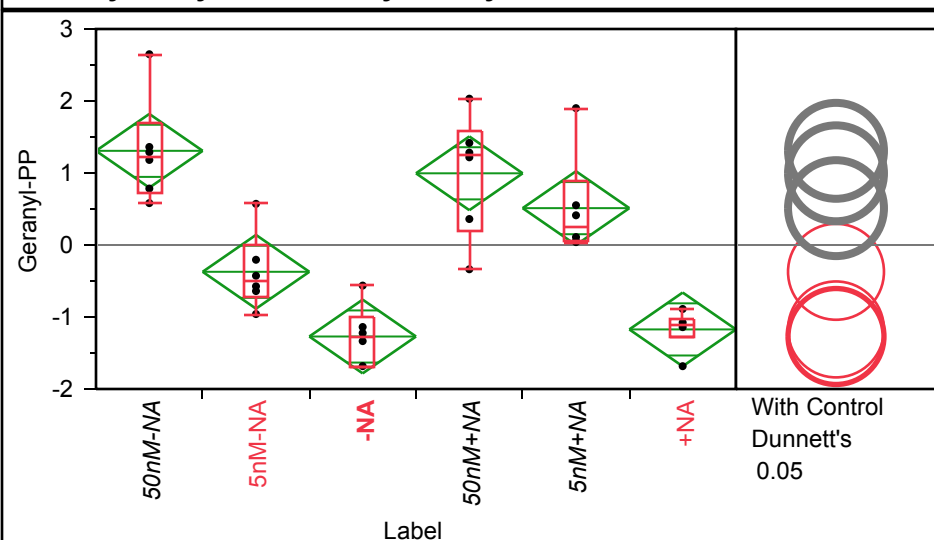

### Quantiles

| Level   | Minimum  | 10%      | 25%      | Median   | 75%      | 90%      | Maximum  |
|---------|----------|----------|----------|----------|----------|----------|----------|
| 50nM-NA | 0.581891 | 0.581891 | 0.733458 | 1.235544 | 1.683385 | 2.649513 | 2.649513 |
| 5nM-NA  | -0.95924 | -0.95924 | -0.71982 | -0.50014 | -0.01088 | 0.571684 | 0.571684 |
| -NA     | -1.68251 | -1.68251 | -1.68243 | -1.27877 | -0.99527 | -0.56391 | -0.56391 |
| 50nM+NA | -0.33705 | -0.33705 | 0.186203 | 1.25028  | 1.571487 | 2.032188 | 2.032188 |
| 5nM+NA  | 0.040395 | 0.040395 | 0.05188  | 0.261174 | 0.889233 | 1.900668 | 1.900668 |
| +NA     | -1.68314 | -1.68314 | -1.28644 | -1.11575 | -1.03026 | -0.88857 | -0.88857 |

### Oneway Anova

#### Summary of Fit

|                            |          |
|----------------------------|----------|
| Rsquare                    | 0.763616 |
| Adj Rsquare                | 0.724219 |
| Root Mean Square Error     | 0.614171 |
| Mean of Response           | 5.56e-10 |
| Observations (or Sum Wgts) | 36       |

#### Analysis of Variance

| Source   | DF | Sum of Squares | Mean Square | F Ratio | Prob > F |
|----------|----|----------------|-------------|---------|----------|
| Label    | 5  | 36.555843      | 7.31117     | 19.3824 | <.0001 * |
| Error    | 30 | 11.316168      | 0.37721     |         |          |
| C. Total | 35 | 47.872012      |             |         |          |

#### Means for Oneway Anova

| Level   | Number | Mean    | Std Error | Lower 95% | Upper 95% |
|---------|--------|---------|-----------|-----------|-----------|
| 50nM-NA | 6      | 1.3080  | 0.25073   | 0.796     | 1.820     |
| 5nM-NA  | 6      | -0.3722 | 0.25073   | -0.884    | 0.140     |
| -NA     | 6      | -1.2709 | 0.25073   | -1.783    | -0.759    |
| 50nM+NA | 6      | 0.9957  | 0.25073   | 0.484     | 1.508     |
| 5nM+NA  | 6      | 0.5119  | 0.25073   | -0.0002   | 1.024     |
| +NA     | 6      | -1.1725 | 0.25073   | -1.685    | -0.660    |

Std Error uses a pooled estimate of error variance

### Means Comparisons

#### Comparisons with a control using Dunnett's Method

### Oneway Analysis of Glucaric acid By Label

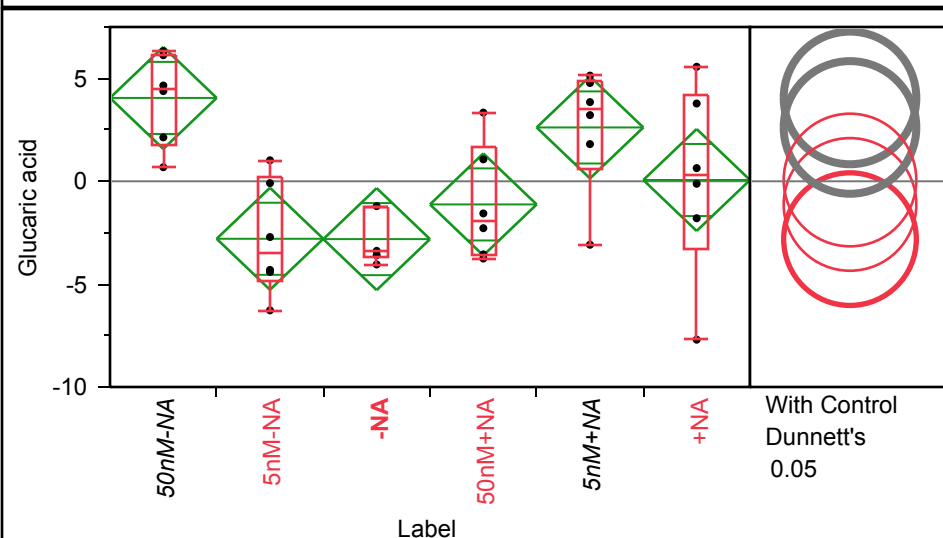

### Quantiles

| Level   | Minimum  | 10%      | 25%      | Median   | 75%      | 90%      | Maximum  |
|---------|----------|----------|----------|----------|----------|----------|----------|
| 50nM-NA | 0.684608 | 0.684608 | 1.772114 | 4.52028  | 6.177898 | 6.322774 | 6.322774 |
| 5nM-NA  | -6.27366 | -6.27366 | -4.87422 | -3.50935 | 0.188373 | 1.019477 | 1.019477 |
| -NA     | -4.0433  | -4.0433  | -3.70644 | -3.39257 | -1.23062 | -1.20731 | -1.20731 |
| 50nM+NA | -3.75367 | -3.75367 | -3.60546 | -1.92176 | 1.633933 | 3.338858 | 3.338858 |
| 5nM+NA  | -3.08468 | -3.08468 | 0.584452 | 3.533454 | 4.866845 | 5.13664  | 5.13664  |
| +NA     | -7.6995  | -7.6995  | -3.27201 | 0.259938 | 4.226762 | 5.566565 | 5.566565 |

### Oneway Anova

#### Summary of Fit

|                            |          |
|----------------------------|----------|
| Rsquare                    | 0.476817 |
| Adj Rsquare                | 0.389619 |
| Root Mean Square Error     | 2.972112 |
| Mean of Response           | 2.78e-10 |
| Observations (or Sum Wgts) | 36       |

#### Analysis of Variance

| Source   | DF | Sum of Squares | Mean Square | F Ratio | Prob > F |
|----------|----|----------------|-------------|---------|----------|
| Label    | 5  | 241.51767      | 48.3035     | 5.4683  | 0.0011 * |
| Error    | 30 | 265.00343      | 8.8334      |         |          |
| C. Total | 35 | 506.52110      |             |         |          |

#### Means for Oneway Anova

| Level   | Number | Mean    | Std Error | Lower 95% | Upper 95% |
|---------|--------|---------|-----------|-----------|-----------|
| 50nM-NA | 6      | 4.0520  | 1.2134    | 1.574     | 6.530     |
| 5nM-NA  | 6      | -2.7949 | 1.2134    | -5.273    | -0.317    |
| -NA     | 6      | -2.8114 | 1.2134    | -5.289    | -0.333    |
| 50nM+NA | 6      | -1.1248 | 1.2134    | -3.603    | 1.353     |
| 5nM+NA  | 6      | 2.6172  | 1.2134    | 0.139     | 5.095     |
| +NA     | 6      | 0.0618  | 1.2134    | -2.416    | 2.540     |

Std Error uses a pooled estimate of error variance

### Means Comparisons

#### Comparisons with a control using Dunnett's Method

### Oneway Analysis of glucono-D-lactone By Label

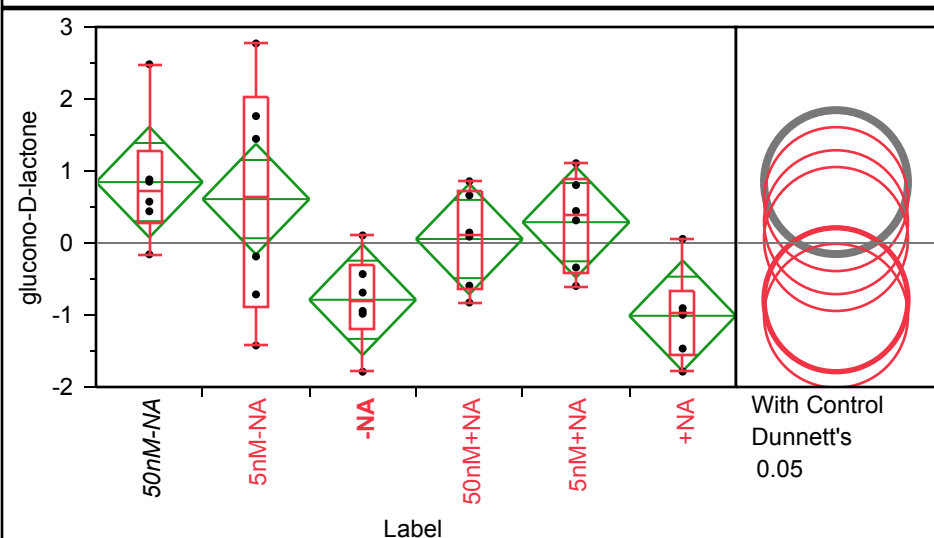

### Quantiles

| Level   | Minimum  | 10%      | 25%      | Median   | 75%      | 90%      | Maximum  |
|---------|----------|----------|----------|----------|----------|----------|----------|
| 50nM-NA | -0.15804 | -0.15804 | 0.290652 | 0.713142 | 1.282506 | 2.482587 | 2.482587 |
| 5nM-NA  | -1.42288 | -1.42288 | -0.89161 | 0.629809 | 2.014644 | 2.771418 | 2.771418 |
| -NA     | -1.78786 | -1.78786 | -1.18435 | -0.81613 | -0.29755 | 0.105095 | 0.105095 |
| 50nM+NA | -0.82679 | -0.82679 | -0.65154 | 0.116524 | 0.710656 | 0.85696  | 0.85696  |
| 5nM+NA  | -0.59764 | -0.59764 | -0.40488 | 0.379353 | 0.88059  | 1.108281 | 1.108281 |
| +NA     | -1.78639 | -1.78639 | -1.54628 | -0.98185 | -0.66481 | 0.056678 | 0.056678 |

### Oneway Anova

#### Summary of Fit

|                            |          |
|----------------------------|----------|
| Rsquare                    | 0.398831 |
| Adj Rsquare                | 0.298636 |
| Root Mean Square Error     | 0.921383 |
| Mean of Response           | -5.6e-10 |
| Observations (or Sum Wgts) | 36       |

#### Analysis of Variance

| Source   | DF | Sum of Squares | Mean Square | F Ratio | Prob > F |
|----------|----|----------------|-------------|---------|----------|
| Label    | 5  | 16.896426      | 3.37929     | 3.9806  | 0.0069 * |
| Error    | 30 | 25.468424      | 0.84895     |         |          |
| C. Total | 35 | 42.364850      |             |         |          |

#### Means for Oneway Anova

| Level   | Number | Mean    | Std Error | Lower 95% | Upper 95% |
|---------|--------|---------|-----------|-----------|-----------|
| 50nM-NA | 6      | 0.8456  | 0.37615   | 0.077     | 1.614     |
| 5nM-NA  | 6      | 0.6093  | 0.37615   | -0.159    | 1.378     |
| -NA     | 6      | -0.7883 | 0.37615   | -1.557    | -0.020    |
| 50nM+NA | 6      | 0.0553  | 0.37615   | -0.713    | 0.824     |
| 5nM+NA  | 6      | 0.2889  | 0.37615   | -0.479    | 1.057     |
| +NA     | 6      | -1.0108 | 0.37615   | -1.779    | -0.243    |

Std Error uses a pooled estimate of error variance

### Means Comparisons

#### Comparisons with a control using Dunnett's Method

### Oneway Analysis of Glucose By Label

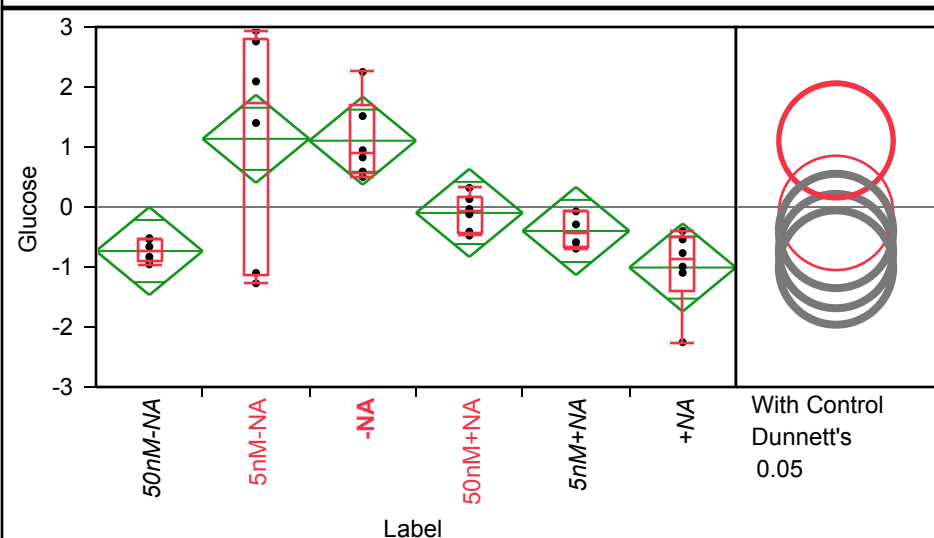

### Quantiles

| Level   | Minimum  | 10%      | 25%      | Median   | 75%      | 90%      | Maximum  |
|---------|----------|----------|----------|----------|----------|----------|----------|
| 50nM-NA | -0.95643 | -0.95643 | -0.91506 | -0.74549 | -0.53338 | -0.51937 | -0.51937 |
| 5nM-NA  | -1.27143 | -1.27143 | -1.14215 | 1.746402 | 2.803557 | 2.936364 | 2.936364 |
| -NA     | 0.500336 | 0.500336 | 0.568221 | 0.88643  | 1.69954  | 2.251277 | 2.251277 |
| 50nM+NA | -0.47607 | -0.47607 | -0.42808 | -0.07782 | 0.178886 | 0.318574 | 0.318574 |
| 5nM+NA  | -0.69512 | -0.69512 | -0.68137 | -0.43873 | -0.07379 | -0.07324 | -0.07324 |
| +NA     | -2.2544  | -2.2544  | -1.3861  | -0.88135 | -0.50469 | -0.39998 | -0.39998 |

### Oneway Anova

#### Summary of Fit

|                            |          |
|----------------------------|----------|
| Rsquare                    | 0.523529 |
| Adj Rsquare                | 0.444117 |
| Root Mean Square Error     | 0.878411 |
| Mean of Response           | 4.93e-17 |
| Observations (or Sum Wgts) | 36       |

#### Analysis of Variance

| Source   | DF | Sum of Squares | Mean Square | F Ratio | Prob > F |
|----------|----|----------------|-------------|---------|----------|
| Label    | 5  | 25.434322      | 5.08686     | 6.5926  | 0.0003 * |
| Error    | 30 | 23.148175      | 0.77161     |         |          |
| C. Total | 35 | 48.582497      |             |         |          |

#### Means for Oneway Anova

| Level   | Number | Mean    | Std Error | Lower 95% | Upper 95% |
|---------|--------|---------|-----------|-----------|-----------|
| 50nM-NA | 6      | -0.7343 | 0.35861   | -1.467    | -0.002    |
| 5nM-NA  | 6      | 1.1363  | 0.35861   | 0.404     | 1.869     |
| -NA     | 6      | 1.1052  | 0.35861   | 0.373     | 1.838     |
| 50nM+NA | 6      | -0.0988 | 0.35861   | -0.831    | 0.634     |
| 5nM+NA  | 6      | -0.3994 | 0.35861   | -1.132    | 0.333     |
| +NA     | 6      | -1.0089 | 0.35861   | -1.741    | -0.277    |

Std Error uses a pooled estimate of error variance

### Means Comparisons

#### Comparisons with a control using Dunnett's Method

### Oneway Analysis of glucose-6-phosphate By Label

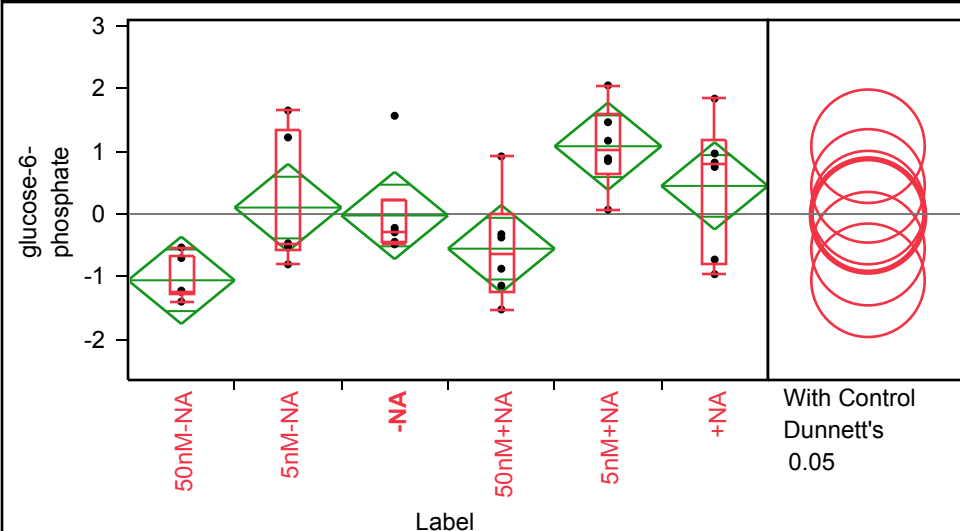

### Quantiles

| Level   | Minimum  | 10%      | 25%      | Median   | 75%      | 90%      | Maximum  |
|---------|----------|----------|----------|----------|----------|----------|----------|
| 50nM-NA | -1.39951 | -1.39951 | -1.2847  | -1.23451 | -0.66118 | -0.53382 | -0.53382 |
| 5nM-NA  | -0.80385 | -0.80385 | -0.58618 | -0.47012 | 1.331548 | 1.653114 | 1.653114 |
| -NA     | -0.48472 | -0.48472 | -0.45388 | -0.28061 | 0.226439 | 1.56948  | 1.56948  |
| 50nM+NA | -1.52494 | -1.52494 | -1.2398  | -0.62466 | -0.01101 | 0.920878 | 0.920878 |
| 5nM+NA  | 0.069722 | 0.069722 | 0.652097 | 1.029735 | 1.613948 | 2.054974 | 2.054974 |
| +NA     | -0.96128 | -0.96128 | -0.78585 | 0.787382 | 1.186046 | 1.843356 | 1.843356 |

### Oneway Anova

#### Summary of Fit

|                            |          |
|----------------------------|----------|
| Rsquare                    | 0.446446 |
| Adj Rsquare                | 0.354187 |
| Root Mean Square Error     | 0.835194 |
| Mean of Response           | 2.78e-10 |
| Observations (or Sum Wgts) | 36       |

#### Analysis of Variance

| Source   | DF | Sum of Squares | Mean Square | F Ratio | Prob > F |
|----------|----|----------------|-------------|---------|----------|
| Label    | 5  | 16.877344      | 3.37547     | 4.8390  | 0.0023 * |
| Error    | 30 | 20.926455      | 0.69755     |         |          |
| C. Total | 35 | 37.803799      |             |         |          |

#### Means for Oneway Anova

| Level   | Number | Mean    | Std Error | Lower 95% | Upper 95% |
|---------|--------|---------|-----------|-----------|-----------|
| 50nM-NA | 6      | -1.0587 | 0.34097   | -1.755    | -0.362    |
| 5nM-NA  | 6      | 0.1033  | 0.34097   | -0.593    | 0.800     |
| -NA     | 6      | -0.0235 | 0.34097   | -0.720    | 0.673     |
| 50nM+NA | 6      | -0.5533 | 0.34097   | -1.250    | 0.143     |
| 5nM+NA  | 6      | 1.0829  | 0.34097   | 0.387     | 1.779     |
| +NA     | 6      | 0.4494  | 0.34097   | -0.247    | 1.146     |

Std Error uses a pooled estimate of error variance

### Means Comparisons

#### Comparisons with a control using Dunnett's Method

### Oneway Analysis of glutamate By Label

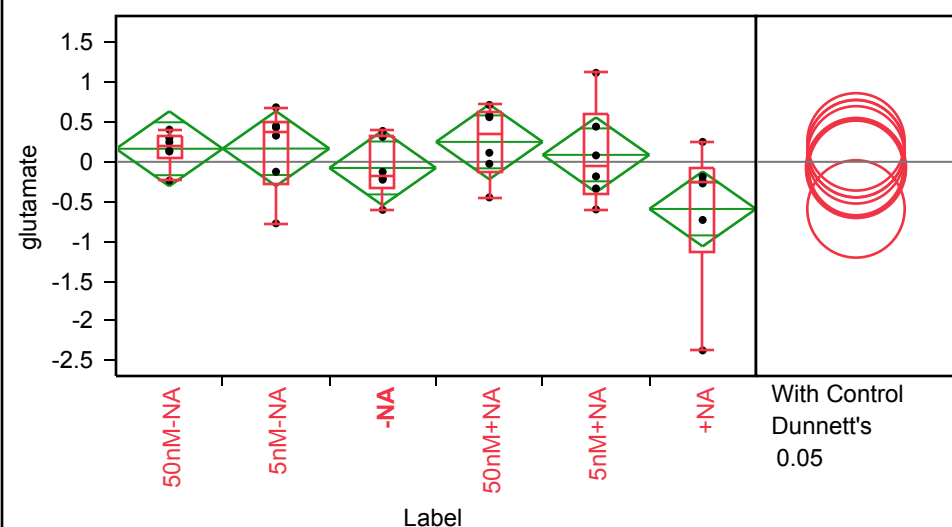

### Quantiles

| Level   | Minimum  | 10%      | 25%      | Median   | 75%      | 90%      | Maximum  |
|---------|----------|----------|----------|----------|----------|----------|----------|
| 50nM-NA | -0.23742 | -0.23742 | 0.037912 | 0.195374 | 0.324834 | 0.404835 | 0.404835 |
| 5nM-NA  | -0.77353 | -0.77353 | -0.28672 | 0.380603 | 0.509447 | 0.685491 | 0.685491 |
| -NA     | -0.60399 | -0.60399 | -0.31945 | -0.16767 | 0.331996 | 0.388237 | 0.388237 |
| 50nM+NA | -0.44786 | -0.44786 | -0.13044 | 0.337629 | 0.619058 | 0.715437 | 0.715437 |
| 5nM+NA  | -0.59814 | -0.59814 | -0.4009  | -0.05124 | 0.611371 | 1.118727 | 1.118727 |
| +NA     | -2.37134 | -2.37134 | -1.14097 | -0.25724 | -0.07793 | 0.250758 | 0.250758 |

### Oneway Anova

#### Summary of Fit

|                            |          |
|----------------------------|----------|
| Rsquare                    | 0.232402 |
| Adj Rsquare                | 0.104469 |
| Root Mean Square Error     | 0.564286 |
| Mean of Response           | 0        |
| Observations (or Sum Wgts) | 36       |

#### Analysis of Variance

| Source   | DF | Sum of Squares | Mean Square | F Ratio | Prob > F |
|----------|----|----------------|-------------|---------|----------|
| Label    | 5  | 2.892174       | 0.578435    | 1.8166  | 0.1397   |
| Error    | 30 | 9.552547       | 0.318418    |         |          |
| C. Total | 35 | 12.444721      |             |         |          |

#### Means for Oneway Anova

| Level   | Number | Mean     | Std Error | Lower 95% | Upper 95% |
|---------|--------|----------|-----------|-----------|-----------|
| 50nM-NA | 6      | 0.16434  | 0.23037   | -0.306    | 0.6348    |
| 5nM-NA  | 6      | 0.16658  | 0.23037   | -0.304    | 0.6371    |
| -NA     | 6      | -0.07707 | 0.23037   | -0.548    | 0.3934    |
| 50nM+NA | 6      | 0.25086  | 0.23037   | -0.220    | 0.7213    |
| 5nM+NA  | 6      | 0.08753  | 0.23037   | -0.383    | 0.5580    |
| +NA     | 6      | -0.59223 | 0.23037   | -1.063    | -0.1218   |

Std Error uses a pooled estimate of error variance

### Means Comparisons

#### Comparisons with a control using Dunnett's Method

### Oneway Analysis of glutamine By Label

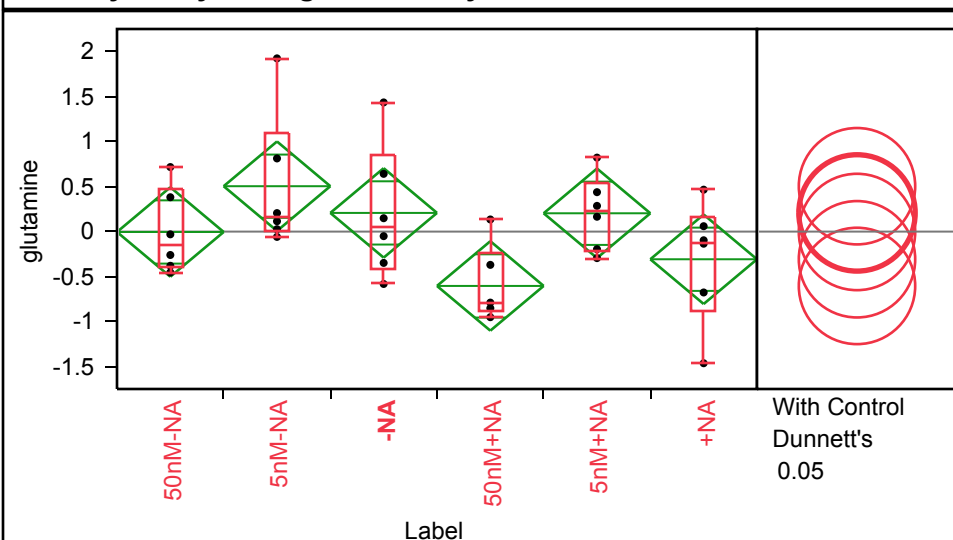

### Quantiles

| Level   | Minimum  | 10%      | 25%      | Median   | 75%      | 90%      | Maximum  |
|---------|----------|----------|----------|----------|----------|----------|----------|
| 50nM-NA | -0.45404 | -0.45404 | -0.39874 | -0.14527 | 0.465999 | 0.717626 | 0.717626 |
| 5nM-NA  | -0.0589  | -0.0589  | 0.00513  | 0.160437 | 1.091673 | 1.926207 | 1.926207 |
| -NA     | -0.58232 | -0.58232 | -0.40673 | 0.04912  | 0.840682 | 1.436242 | 1.436242 |
| 50nM+NA | -0.95174 | -0.95174 | -0.87687 | -0.79327 | -0.2437  | 0.134729 | 0.134729 |
| 5nM+NA  | -0.29481 | -0.29481 | -0.2202  | 0.225612 | 0.53444  | 0.822534 | 0.822534 |
| +NA     | -1.46374 | -1.46374 | -0.87356 | -0.11565 | 0.161488 | 0.466089 | 0.466089 |

### Oneway Anova

#### Summary of Fit

|                            |          |
|----------------------------|----------|
| Rsquare                    | 0.30993  |
| Adj Rsquare                | 0.194918 |
| Root Mean Square Error     | 0.596516 |
| Mean of Response           | 1.111e-9 |
| Observations (or Sum Wgts) | 36       |

#### Analysis of Variance

| Source   | DF | Sum of Squares | Mean Square | F Ratio | Prob > F |
|----------|----|----------------|-------------|---------|----------|
| Label    | 5  | 4.794407       | 0.958881    | 2.6948  | 0.0398 * |
| Error    | 30 | 10.674923      | 0.355831    |         |          |
| C. Total | 35 | 15.469330      |             |         |          |

#### Means for Oneway Anova

| Level   | Number | Mean     | Std Error | Lower 95% | Upper 95% |
|---------|--------|----------|-----------|-----------|-----------|
| 50nM-NA | 6      | -0.00419 | 0.24353   | -0.502    | 0.493     |
| 5nM-NA  | 6      | 0.50469  | 0.24353   | 0.00734   | 1.002     |
| -NA     | 6      | 0.20769  | 0.24353   | -0.290    | 0.705     |
| 50nM+NA | 6      | -0.60422 | 0.24353   | -1.102    | -0.107    |
| 5nM+NA  | 6      | 0.20367  | 0.24353   | -0.294    | 0.701     |
| +NA     | 6      | -0.30764 | 0.24353   | -0.805    | 0.190     |

Std Error uses a pooled estimate of error variance

### Means Comparisons

#### Comparisons with a control using Dunnett's Method

### Oneway Analysis of glutathione By Label

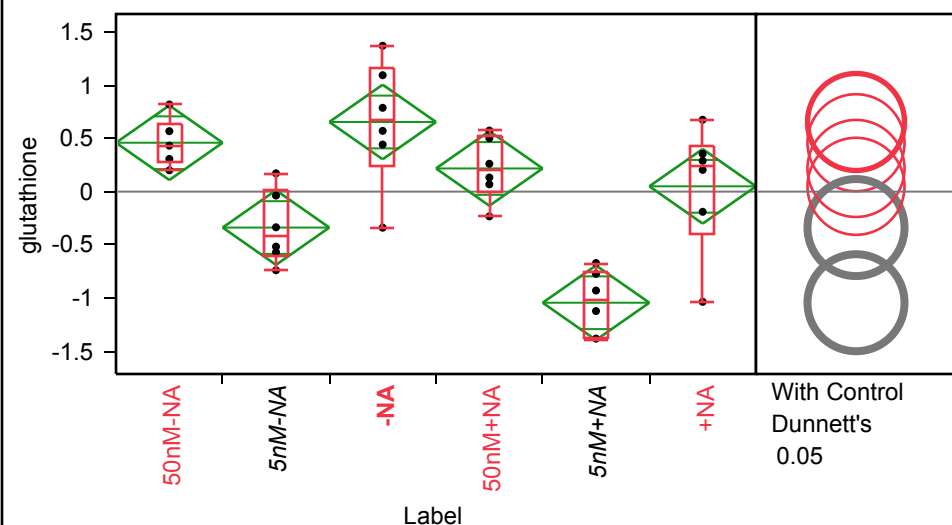

### Quantiles

| Level   | Minimum  | 10%      | 25%      | Median   | 75%      | 90%      | Maximum  |
|---------|----------|----------|----------|----------|----------|----------|----------|
| 50nM-NA | 0.200151 | 0.200151 | 0.279911 | 0.430789 | 0.629773 | 0.81765  | 0.81765  |
| 5nM-NA  | -0.73801 | -0.73801 | -0.61104 | -0.42536 | 0.015183 | 0.171698 | 0.171698 |
| -NA     | -0.33818 | -0.33818 | 0.246631 | 0.678218 | 1.161399 | 1.3685   | 1.3685   |
| 50nM+NA | -0.23224 | -0.23224 | -0.0067  | 0.197041 | 0.519192 | 0.572976 | 0.572976 |
| 5nM+NA  | -1.38542 | -1.38542 | -1.38074 | -1.02433 | -0.74608 | -0.66986 | -0.66986 |
| +NA     | -1.0338  | -1.0338  | -0.4004  | 0.24653  | 0.434652 | 0.674314 | 0.674314 |

### Oneway Anova

#### Summary of Fit

|                            |          |
|----------------------------|----------|
| Rsquare                    | 0.681924 |
| Adj Rsquare                | 0.628911 |
| Root Mean Square Error     | 0.419632 |
| Mean of Response           | -2.8e-10 |
| Observations (or Sum Wgts) | 36       |

#### Analysis of Variance

| Source   | DF | Sum of Squares | Mean Square | F Ratio | Prob > F |
|----------|----|----------------|-------------|---------|----------|
| Label    | 5  | 11.325625      | 2.26513     | 12.8634 | <.0001 * |
| Error    | 30 | 5.282722       | 0.17609     |         |          |
| C. Total | 35 | 16.608347      |             |         |          |

#### Means for Oneway Anova

| Level   | Number | Mean    | Std Error | Lower 95% | Upper 95% |
|---------|--------|---------|-----------|-----------|-----------|
| 50nM-NA | 6      | 0.4588  | 0.17131   | 0.109     | 0.809     |
| 5nM-NA  | 6      | -0.3371 | 0.17131   | -0.687    | 0.013     |
| -NA     | 6      | 0.6534  | 0.17131   | 0.304     | 1.003     |
| 50nM+NA | 6      | 0.2174  | 0.17131   | -0.132    | 0.567     |
| 5nM+NA  | 6      | -1.0424 | 0.17131   | -1.392    | -0.693    |
| +NA     | 6      | 0.0498  | 0.17131   | -0.300    | 0.400     |

Std Error uses a pooled estimate of error variance

### Means Comparisons

#### Comparisons with a control using Dunnett's Method

### Oneway Analysis of glutathione disulfide By Label

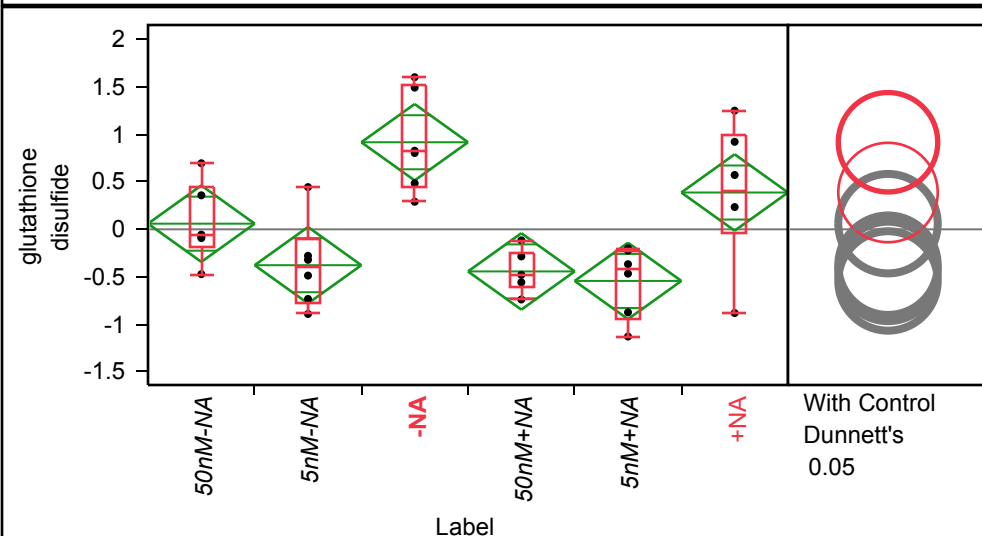

### Quantiles

| Level   | Minimum  | 10%      | 25%      | Median   | 75%      | 90%      | Maximum  |
|---------|----------|----------|----------|----------|----------|----------|----------|
| 50nM-NA | -0.47295 | -0.47295 | -0.18766 | -0.06601 | 0.443323 | 0.696976 | 0.696976 |
| 5nM-NA  | -0.89281 | -0.89281 | -0.77386 | -0.4048  | -0.09803 | 0.445432 | 0.445432 |
| -NA     | 0.29114  | 0.29114  | 0.437112 | 0.817306 | 1.522529 | 1.605017 | 1.605017 |
| 50nM+NA | -0.74014 | -0.74014 | -0.60432 | -0.48153 | -0.24325 | -0.1159  | -0.1159  |
| 5nM+NA  | -1.13089 | -1.13089 | -0.93943 | -0.41744 | -0.21869 | -0.19988 | -0.19988 |
| +NA     | -0.88312 | -0.88312 | -0.04786 | 0.404003 | 1.005462 | 1.25187  | 1.25187  |

### Oneway Anova

#### Summary of Fit

|                            |          |
|----------------------------|----------|
| Rsquare                    | 0.583091 |
| Adj Rsquare                | 0.513606 |
| Root Mean Square Error     | 0.483519 |
| Mean of Response           | 8.33e-10 |
| Observations (or Sum Wgts) | 36       |

#### Analysis of Variance

| Source   | DF | Sum of Squares | Mean Square | F Ratio | Prob > F |
|----------|----|----------------|-------------|---------|----------|
| Label    | 5  | 9.809395       | 1.96188     | 8.3916  | <.0001 * |
| Error    | 30 | 7.013711       | 0.23379     |         |          |
| C. Total | 35 | 16.823106      |             |         |          |

#### Means for Oneway Anova

| Level   | Number | Mean     | Std Error | Lower 95% | Upper 95% |
|---------|--------|----------|-----------|-----------|-----------|
| 50nM-NA | 6      | 0.05970  | 0.19740   | -0.3434   | 0.463     |
| 5nM-NA  | 6      | -0.37840 | 0.19740   | -0.7815   | 0.025     |
| -NA     | 6      | 0.91860  | 0.19740   | 0.5155    | 1.322     |
| 50nM+NA | 6      | -0.44397 | 0.19740   | -0.8471   | -0.041    |
| 5nM+NA  | 6      | -0.54437 | 0.19740   | -0.9475   | -0.141    |
| +NA     | 6      | 0.38844  | 0.19740   | -0.0147   | 0.792     |

Std Error uses a pooled estimate of error variance

### Means Comparisons

#### Comparisons with a control using Dunnett's Method

### Oneway Analysis of Glycerophosphocholine By Label

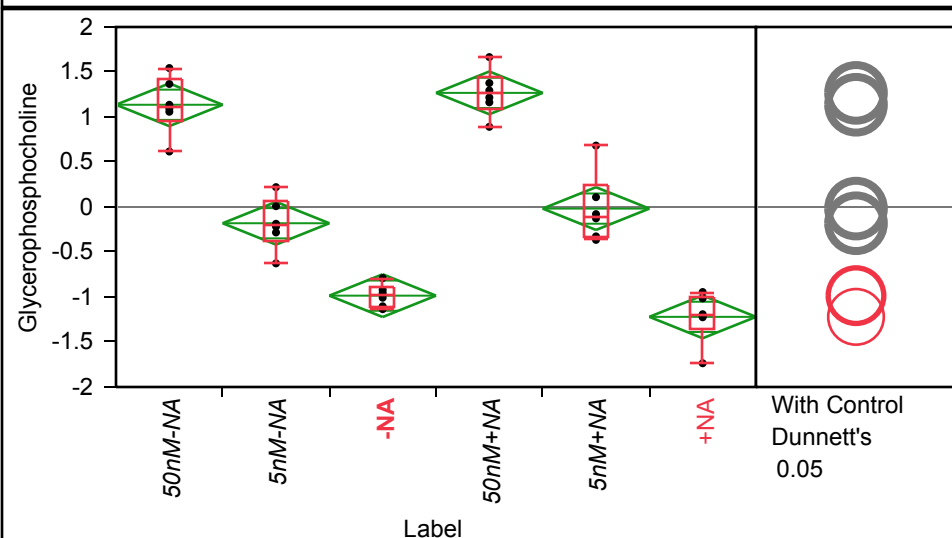

### Quantiles

| Level   | Minimum  | 10%      | 25%      | Median   | 75%      | 90%      | Maximum  |
|---------|----------|----------|----------|----------|----------|----------|----------|
| 50nM-NA | 0.616597 | 0.616597 | 0.947771 | 1.115027 | 1.411294 | 1.543703 | 1.543703 |
| 5nM-NA  | -0.62624 | -0.62624 | -0.36866 | -0.20186 | 0.061982 | 0.22056  | 0.22056  |
| -NA     | -1.1353  | -1.1353  | -1.11126 | -0.98115 | -0.88721 | -0.78986 | -0.78986 |
| 50nM+NA | 0.890782 | 0.890782 | 1.095057 | 1.255634 | 1.449334 | 1.665503 | 1.665503 |
| 5nM+NA  | -0.3652  | -0.3652  | -0.33632 | -0.10276 | 0.252484 | 0.68192  | 0.68192  |
| +NA     | -1.73617 | -1.73617 | -1.35286 | -1.2016  | -0.99723 | -0.94495 | -0.94495 |

### Oneway Anova

#### Summary of Fit

|                            |          |
|----------------------------|----------|
| Rsquare                    | 0.930019 |
| Adj Rsquare                | 0.918356 |
| Root Mean Square Error     | 0.284847 |
| Mean of Response           | 2.78e-11 |
| Observations (or Sum Wgts) | 36       |

#### Analysis of Variance

| Source   | DF | Sum of Squares | Mean Square | F Ratio | Prob > F |
|----------|----|----------------|-------------|---------|----------|
| Label    | 5  | 32.348912      | 6.46978     | 79.7379 | <.0001 * |
| Error    | 30 | 2.434142       | 0.08114     |         |          |
| C. Total | 35 | 34.783054      |             |         |          |

#### Means for Oneway Anova

| Level   | Number | Mean    | Std Error | Lower 95% | Upper 95% |
|---------|--------|---------|-----------|-----------|-----------|
| 50nM-NA | 6      | 1.1359  | 0.11629   | 0.898     | 1.373     |
| 5nM-NA  | 6      | -0.1805 | 0.11629   | -0.418    | 0.057     |
| -NA     | 6      | -0.9851 | 0.11629   | -1.223    | -0.748    |
| 50nM+NA | 6      | 1.2680  | 0.11629   | 1.031     | 1.505     |
| 5nM+NA  | 6      | -0.0177 | 0.11629   | -0.255    | 0.220     |
| +NA     | 6      | -1.2207 | 0.11629   | -1.458    | -0.983    |

Std Error uses a pooled estimate of error variance

### Means Comparisons

#### Comparisons with a control using Dunnett's Method

### Oneway Analysis of glycine By Label

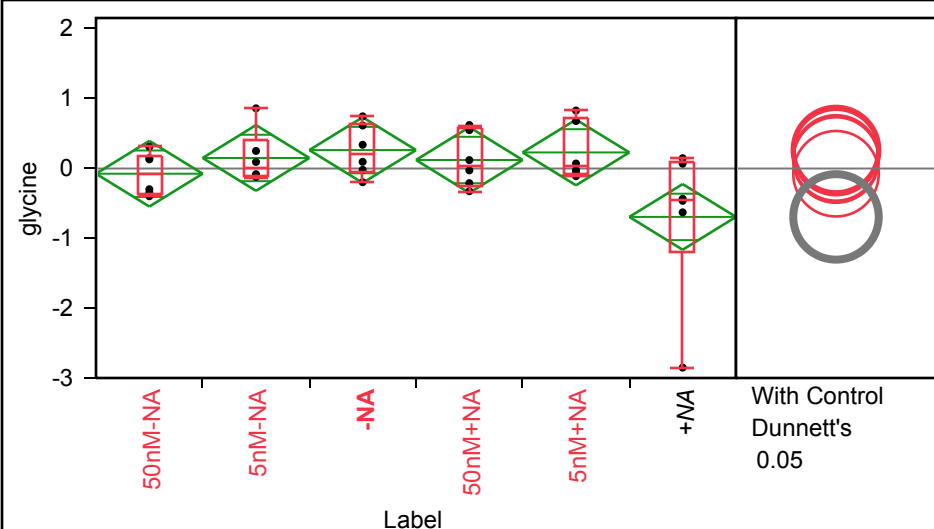

### Quantiles

| Level   | Minimum  | 10%      | 25%      | Median   | 75%      | 90%      | Maximum  |
|---------|----------|----------|----------|----------|----------|----------|----------|
| 50nM-NA | -0.39711 | -0.39711 | -0.35776 | -0.08279 | 0.189717 | 0.311414 | 0.311414 |
| 5nM-NA  | -0.12222 | -0.12222 | -0.10343 | 0.00639  | 0.404021 | 0.861497 | 0.861497 |
| -NA     | -0.19602 | -0.19602 | -0.063   | 0.21785  | 0.649028 | 0.747119 | 0.747119 |
| 50nM+NA | -0.32494 | -0.32494 | -0.23831 | 0.046884 | 0.568065 | 0.622719 | 0.622719 |
| 5nM+NA  | -0.10874 | -0.10874 | -0.07562 | 0.022787 | 0.717243 | 0.830244 | 0.830244 |
| +NA     | -2.85094 | -2.85094 | -1.18358 | -0.44844 | 0.089085 | 0.148    | 0.148    |

### Oneway Anova

#### Summary of Fit

|                            |          |
|----------------------------|----------|
| Rsquare                    | 0.288833 |
| Adj Rsquare                | 0.170305 |
| Root Mean Square Error     | 0.564164 |
| Mean of Response           | 8.33e-10 |
| Observations (or Sum Wgts) | 36       |

#### Analysis of Variance

| Source   | DF | Sum of Squares | Mean Square | F Ratio | Prob > F |
|----------|----|----------------|-------------|---------|----------|
| Label    | 5  | 3.877994       | 0.775599    | 2.4368  | 0.0574   |
| Error    | 30 | 9.548432       | 0.318281    |         |          |
| C. Total | 35 | 13.426425      |             |         |          |

#### Means for Oneway Anova

| Level   | Number | Mean     | Std Error | Lower 95% | Upper 95% |
|---------|--------|----------|-----------|-----------|-----------|
| 50nM-NA | 6      | -0.07446 | 0.23032   | -0.545    | 0.3959    |
| 5nM-NA  | 6      | 0.15107  | 0.23032   | -0.319    | 0.6214    |
| -NA     | 6      | 0.26408  | 0.23032   | -0.206    | 0.7345    |
| 50nM+NA | 6      | 0.12199  | 0.23032   | -0.348    | 0.5924    |
| 5nM+NA  | 6      | 0.23034  | 0.23032   | -0.240    | 0.7007    |
| +NA     | 6      | -0.69303 | 0.23032   | -1.163    | -0.2227   |

Std Error uses a pooled estimate of error variance

### Means Comparisons

#### Comparisons with a control using Dunnett's Method

### Oneway Analysis of GMP By Label

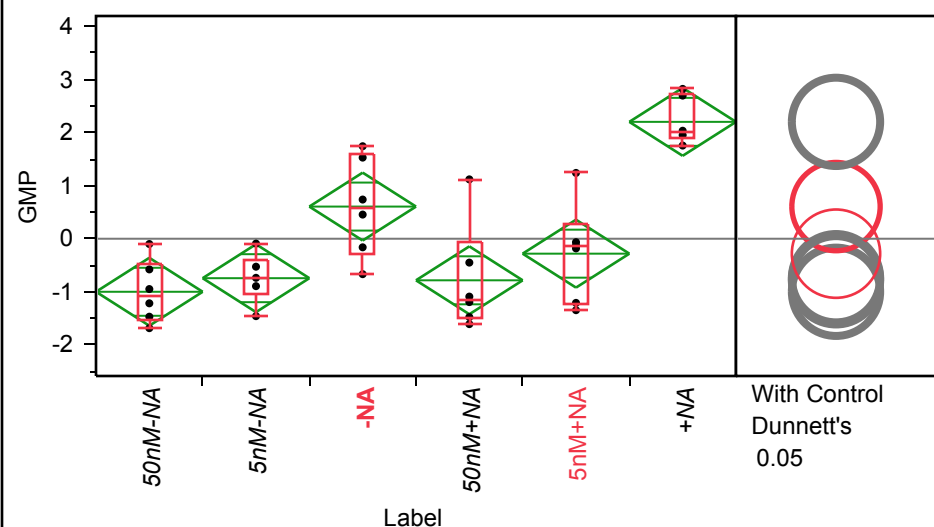

### Quantiles

| Level   | Minimum  | 10%      | 25%      | Median   | 75%      | 90%      | Maximum  |
|---------|----------|----------|----------|----------|----------|----------|----------|
| 50nM-NA | -1.68423 | -1.68423 | -1.52234 | -1.08207 | -0.45813 | -0.09972 | -0.09972 |
| 5nM-NA  | -1.45784 | -1.45784 | -1.03421 | -0.74462 | -0.41786 | -0.09167 | -0.09167 |
| -NA     | -0.6674  | -0.6674  | -0.28813 | 0.596286 | 1.58124  | 1.741673 | 1.741673 |
| 50nM+NA | -1.60801 | -1.60801 | -1.50864 | -1.14135 | -0.05772 | 1.117746 | 1.117746 |
| 5nM+NA  | -1.34541 | -1.34541 | -1.24254 | -0.15404 | 0.260975 | 1.239301 | 1.239301 |
| +NA     | 1.75467  | 1.75467  | 1.900623 | 1.99202  | 2.727128 | 2.82139  | 2.82139  |

### Oneway Anova

#### Summary of Fit

|                            |          |
|----------------------------|----------|
| Rsquare                    | 0.717165 |
| Adj Rsquare                | 0.670026 |
| Root Mean Square Error     | 0.766706 |
| Mean of Response           | 2.78e-10 |
| Observations (or Sum Wgts) | 36       |

#### Analysis of Variance

| Source   | DF | Sum of Squares | Mean Square | F Ratio | Prob > F |
|----------|----|----------------|-------------|---------|----------|
| Label    | 5  | 44.716131      | 8.94323     | 15.2138 | <.0001 * |
| Error    | 30 | 17.635136      | 0.58784     |         |          |
| C. Total | 35 | 62.351267      |             |         |          |

#### Means for Oneway Anova

| Level   | Number | Mean    | Std Error | Lower 95% | Upper 95% |
|---------|--------|---------|-----------|-----------|-----------|
| 50nM-NA | 6      | -0.9990 | 0.31301   | -1.638    | -0.360    |
| 5nM-NA  | 6      | -0.7431 | 0.31301   | -1.382    | -0.104    |
| -NA     | 6      | 0.6055  | 0.31301   | -0.034    | 1.245     |
| 50nM+NA | 6      | -0.7830 | 0.31301   | -1.422    | -0.144    |
| 5nM+NA  | 6      | -0.2813 | 0.31301   | -0.921    | 0.358     |
| +NA     | 6      | 2.2008  | 0.31301   | 1.562     | 2.840     |

Std Error uses a pooled estimate of error variance

### Means Comparisons

#### Comparisons with a control using Dunnett's Method

### Oneway Analysis of Guanidoacetic acid By Label

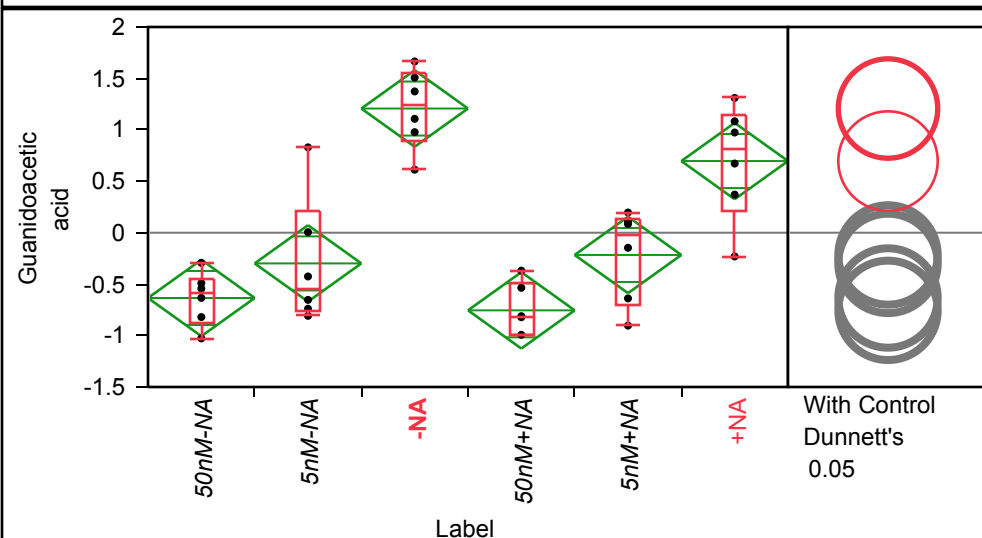

### Quantiles

| Level   | Minimum  | 10%      | 25%      | Median   | 75%      | 90%      | Maximum  |
|---------|----------|----------|----------|----------|----------|----------|----------|
| 50nM-NA | -1.02743 | -1.02743 | -0.87202 | -0.58845 | -0.44093 | -0.29312 | -0.29312 |
| 5nM-NA  | -0.80808 | -0.80808 | -0.75625 | -0.53925 | 0.21124  | 0.829887 | 0.829887 |
| -NA     | 0.61294  | 0.61294  | 0.886313 | 1.240441 | 1.547318 | 1.664759 | 1.664759 |
| 50nM+NA | -0.99903 | -0.99903 | -0.99411 | -0.8165  | -0.49376 | -0.36874 | -0.36874 |
| 5nM+NA  | -0.90316 | -0.90316 | -0.70477 | -0.03136 | 0.132221 | 0.19648  | 0.19648  |
| +NA     | -0.23066 | -0.23066 | 0.22008  | 0.823308 | 1.14009  | 1.310698 | 1.310698 |

### Oneway Anova

#### Summary of Fit

|                            |          |
|----------------------------|----------|
| Rsquare                    | 0.754632 |
| Adj Rsquare                | 0.713737 |
| Root Mean Square Error     | 0.445457 |
| Mean of Response           | 2.78e-11 |
| Observations (or Sum Wgts) | 36       |

#### Analysis of Variance

| Source   | DF | Sum of Squares | Mean Square | F Ratio | Prob > F |
|----------|----|----------------|-------------|---------|----------|
| Label    | 5  | 18.308360      | 3.66167     | 18.4530 | <.0001 * |
| Error    | 30 | 5.952956       | 0.19843     |         |          |
| C. Total | 35 | 24.261315      |             |         |          |

#### Means for Oneway Anova

| Level   | Number | Mean    | Std Error | Lower 95% | Upper 95% |
|---------|--------|---------|-----------|-----------|-----------|
| 50nM-NA | 6      | -0.6346 | 0.18186   | -1.006    | -0.263    |
| 5nM-NA  | 6      | -0.2984 | 0.18186   | -0.670    | 0.073     |
| -NA     | 6      | 1.2074  | 0.18186   | 0.836     | 1.579     |
| 50nM+NA | 6      | -0.7548 | 0.18186   | -1.126    | -0.383    |
| 5nM+NA  | 6      | -0.2162 | 0.18186   | -0.588    | 0.155     |
| +NA     | 6      | 0.6967  | 0.18186   | 0.325     | 1.068     |

Std Error uses a pooled estimate of error variance

### Means Comparisons

#### Comparisons with a control using Dunnett's Method

### Oneway Analysis of histidine By Label

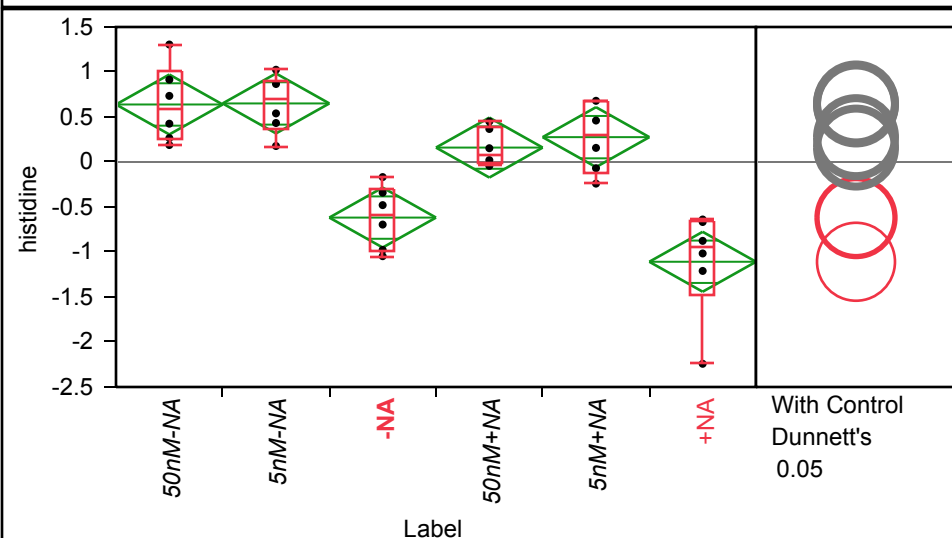

### Quantiles

| Level   | Minimum  | 10%      | 25%      | Median   | 75%      | 90%      | Maximum  |
|---------|----------|----------|----------|----------|----------|----------|----------|
| 50nM-NA | 0.188544 | 0.188544 | 0.246292 | 0.580182 | 1.012277 | 1.305121 | 1.305121 |
| 5nM-NA  | 0.177592 | 0.177592 | 0.369319 | 0.70083  | 0.906263 | 1.024813 | 1.024813 |
| -NA     | -1.04647 | -1.04647 | -0.9941  | -0.58727 | -0.29737 | -0.16766 | -0.16766 |
| 50nM+NA | -0.04307 | -0.04307 | -0.00061 | 0.0871   | 0.387698 | 0.449766 | 0.449766 |
| 5nM+NA  | -0.2402  | -0.2402  | -0.11189 | 0.308772 | 0.671635 | 0.679872 | 0.679872 |
| +NA     | -2.24214 | -2.24214 | -1.46836 | -0.94625 | -0.65978 | -0.639   | -0.639   |

### Oneway Anova

#### Summary of Fit

|                            |          |
|----------------------------|----------|
| Rsquare                    | 0.76143  |
| Adj Rsquare                | 0.721669 |
| Root Mean Square Error     | 0.39926  |
| Mean of Response           | 2.78e-10 |
| Observations (or Sum Wgts) | 36       |

#### Analysis of Variance

| Source   | DF | Sum of Squares | Mean Square | F Ratio | Prob > F |
|----------|----|----------------|-------------|---------|----------|
| Label    | 5  | 15.263273      | 3.05265     | 19.1499 | <.0001 * |
| Error    | 30 | 4.782252       | 0.15941     |         |          |
| C. Total | 35 | 20.045525      |             |         |          |

#### Means for Oneway Anova

| Level   | Number | Mean    | Std Error | Lower 95% | Upper 95% |
|---------|--------|---------|-----------|-----------|-----------|
| 50nM-NA | 6      | 0.6390  | 0.16300   | 0.306     | 0.9719    |
| 5nM-NA  | 6      | 0.6507  | 0.16300   | 0.318     | 0.9836    |
| -NA     | 6      | -0.6177 | 0.16300   | -0.951    | -0.2848   |
| 50nM+NA | 6      | 0.1602  | 0.16300   | -0.173    | 0.4931    |
| 5nM+NA  | 6      | 0.2762  | 0.16300   | -0.057    | 0.6090    |
| +NA     | 6      | -1.1085 | 0.16300   | -1.441    | -0.7756   |

Std Error uses a pooled estimate of error variance

### Means Comparisons

#### Comparisons with a control using Dunnett's Method

### Oneway Analysis of homocysteine By Label

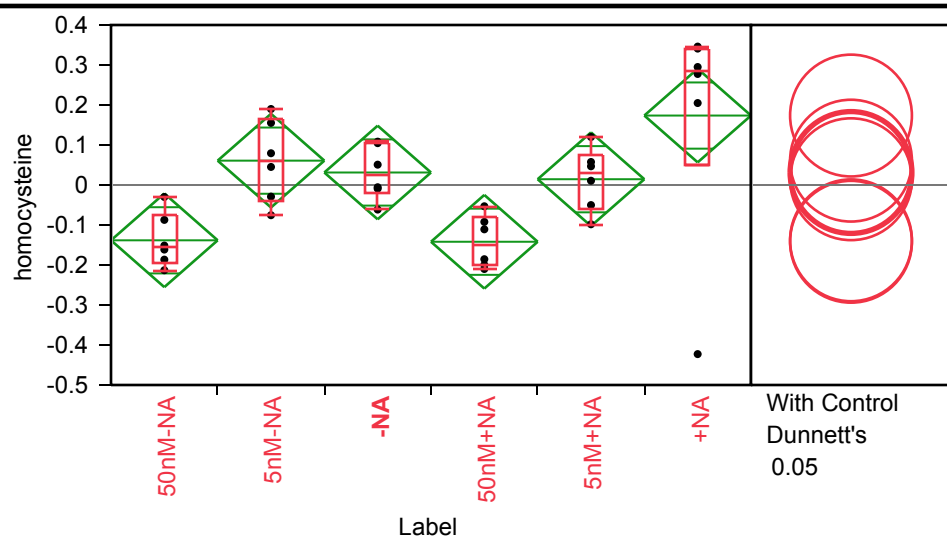

### Quantiles

| Level   | Minimum  | 10%      | 25%      | Median   | 75%      | 90%      | Maximum  |
|---------|----------|----------|----------|----------|----------|----------|----------|
| 50nM-NA | -0.21313 | -0.21313 | -0.19321 | -0.15641 | -0.07291 | -0.02998 | -0.02998 |
| 5nM-NA  | -0.07551 | -0.07551 | -0.04067 | 0.062259 | 0.163968 | 0.189963 | 0.189963 |
| -NA     | -0.06142 | -0.06142 | -0.02224 | 0.022615 | 0.105541 | 0.108318 | 0.108318 |
| 50nM+NA | -0.20998 | -0.20998 | -0.20222 | -0.14817 | -0.08244 | -0.05319 | -0.05319 |
| 5nM+NA  | -0.09821 | -0.09821 | -0.06221 | 0.028716 | 0.073163 | 0.120032 | 0.120032 |
| +NA     | -0.42277 | -0.42277 | 0.047982 | 0.286275 | 0.34226  | 0.345992 | 0.345992 |

### Oneway Anova

#### Summary of Fit

|                            |          |
|----------------------------|----------|
| Rsquare                    | 0.429871 |
| Adj Rsquare                | 0.334849 |
| Root Mean Square Error     | 0.140376 |
| Mean of Response           | -5.6e-11 |
| Observations (or Sum Wgts) | 36       |

#### Analysis of Variance

| Source   | DF | Sum of Squares | Mean Square | F Ratio | Prob > F |
|----------|----|----------------|-------------|---------|----------|
| Label    | 5  | 0.4457292      | 0.089146    | 4.5239  | 0.0034 * |
| Error    | 30 | 0.5911622      | 0.019705    |         |          |
| C. Total | 35 | 1.0368914      |             |         |          |

#### Means for Oneway Anova

| Level   | Number | Mean     | Std Error | Lower 95% | Upper 95% |
|---------|--------|----------|-----------|-----------|-----------|
| 50nM-NA | 6      | -0.13829 | 0.05731   | -0.2553   | -0.0213   |
| 5nM-NA  | 6      | 0.06087  | 0.05731   | -0.0562   | 0.1779    |
| -NA     | 6      | 0.03126  | 0.05731   | -0.0858   | 0.1483    |
| 50nM+NA | 6      | -0.14189 | 0.05731   | -0.2589   | -0.0248   |
| 5nM+NA  | 6      | 0.01443  | 0.05731   | -0.1026   | 0.1315    |
| +NA     | 6      | 0.17361  | 0.05731   | 0.0566    | 0.2907    |

Std Error uses a pooled estimate of error variance

### Means Comparisons

#### Comparisons with a control using Dunnett's Method

### Oneway Analysis of homoserine By Label

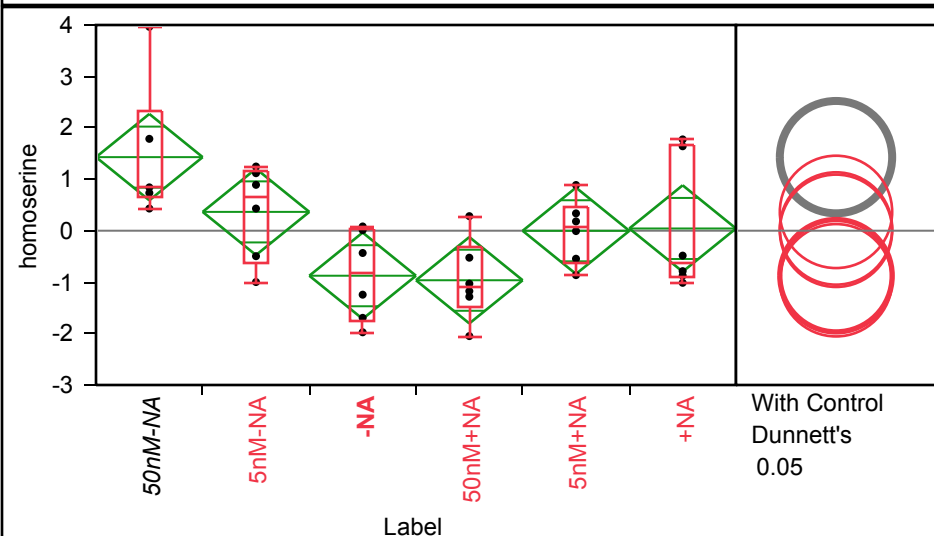

### Quantiles

| Level   | Minimum  | 10%      | 25%      | Median   | 75%      | 90%      | Maximum  |
|---------|----------|----------|----------|----------|----------|----------|----------|
| 50nM-NA | 0.431205 | 0.431205 | 0.658795 | 0.833375 | 2.330996 | 3.964943 | 3.964943 |
| 5nM-NA  | -0.99817 | -0.99817 | -0.62099 | 0.661439 | 1.150897 | 1.247832 | 1.247832 |
| -NA     | -1.97502 | -1.97502 | -1.76445 | -0.83852 | 0.029726 | 0.082439 | 0.082439 |
| 50nM+NA | -2.04913 | -2.04913 | -1.47506 | -1.10237 | -0.32277 | 0.282959 | 0.282959 |
| 5nM+NA  | -0.86347 | -0.86347 | -0.62469 | 0.086919 | 0.474927 | 0.888309 | 0.888309 |
| +NA     | -1.01295 | -1.01295 | -0.90814 | -0.63534 | 1.675417 | 1.775182 | 1.775182 |

### Oneway Anova

#### Summary of Fit

|                            |          |
|----------------------------|----------|
| Rsquare                    | 0.433275 |
| Adj Rsquare                | 0.338821 |
| Root Mean Square Error     | 1.007022 |
| Mean of Response           | -2.8e-11 |
| Observations (or Sum Wgts) | 36       |

#### Analysis of Variance

| Source   | DF | Sum of Squares | Mean Square | F Ratio | Prob > F |
|----------|----|----------------|-------------|---------|----------|
| Label    | 5  | 23.258975      | 4.65179     | 4.5872  | 0.0032 * |
| Error    | 30 | 30.422778      | 1.01409     |         |          |
| C. Total | 35 | 53.681753      |             |         |          |

#### Means for Oneway Anova

| Level   | Number | Mean    | Std Error | Lower 95% | Upper 95% |
|---------|--------|---------|-----------|-----------|-----------|
| 50nM-NA | 6      | 1.4307  | 0.41111   | 0.591     | 2.270     |
| 5nM-NA  | 6      | 0.3660  | 0.41111   | -0.474    | 1.206     |
| -NA     | 6      | -0.8753 | 0.41111   | -1.715    | -0.036    |
| 50nM+NA | 6      | -0.9632 | 0.41111   | -1.803    | -0.124    |
| 5nM+NA  | 6      | -0.0015 | 0.41111   | -0.841    | 0.838     |
| +NA     | 6      | 0.0434  | 0.41111   | -0.796    | 0.883     |

Std Error uses a pooled estimate of error variance

### Means Comparisons

#### Comparisons with a control using Dunnett's Method

### Oneway Analysis of Hydroxyisocaproic acid By Label

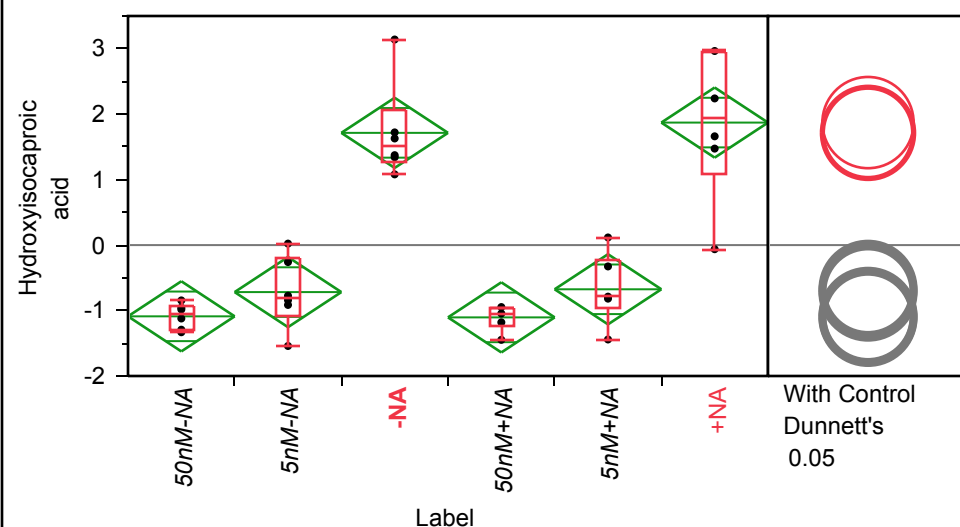

### Quantiles

| Level   | Minimum  | 10%      | 25%      | Median   | 75%      | 90%      | Maximum  |
|---------|----------|----------|----------|----------|----------|----------|----------|
| 50nM-NA | -1.33163 | -1.33163 | -1.30245 | -1.05243 | -0.92846 | -0.84554 | -0.84554 |
| 5nM-NA  | -1.54157 | -1.54157 | -1.0711  | -0.80749 | -0.18914 | 0.022529 | 0.022529 |
| -NA     | 1.080477 | 1.080477 | 1.276696 | 1.501376 | 2.07629  | 3.140562 | 3.140562 |
| 50nM+NA | -1.44743 | -1.44743 | -1.24713 | -1.05234 | -0.9473  | -0.94694 | -0.94694 |
| 5nM+NA  | -1.44196 | -1.44196 | -0.97404 | -0.79092 | -0.21542 | 0.116368 | 0.116368 |
| +NA     | -0.06276 | -0.06276 | 1.089942 | 1.951166 | 2.95438  | 2.965314 | 2.965314 |

### Oneway Anova

#### Summary of Fit

|                            |          |
|----------------------------|----------|
| Rsquare                    | 0.826311 |
| Adj Rsquare                | 0.797363 |
| Root Mean Square Error     | 0.642482 |
| Mean of Response           | 5.56e-10 |
| Observations (or Sum Wgts) | 36       |

#### Analysis of Variance

| Source   | DF | Sum of Squares | Mean Square | F Ratio | Prob > F |
|----------|----|----------------|-------------|---------|----------|
| Label    | 5  | 58.913387      | 11.7827     | 28.5445 | <.0001 * |
| Error    | 30 | 12.383502      | 0.4128      |         |          |
| C. Total | 35 | 71.296889      |             |         |          |

#### Means for Oneway Anova

| Level   | Number | Mean    | Std Error | Lower 95% | Upper 95% |
|---------|--------|---------|-----------|-----------|-----------|
| 50nM-NA | 6      | -1.0885 | 0.26229   | -1.624    | -0.553    |
| 5nM-NA  | 6      | -0.7180 | 0.26229   | -1.254    | -0.182    |
| -NA     | 6      | 1.7146  | 0.26229   | 1.179     | 2.250     |
| 50nM+NA | 6      | -1.1045 | 0.26229   | -1.640    | -0.569    |
| 5nM+NA  | 6      | -0.6753 | 0.26229   | -1.211    | -0.140    |
| +NA     | 6      | 1.8716  | 0.26229   | 1.336     | 2.407     |

Std Error uses a pooled estimate of error variance

### Means Comparisons

#### Comparisons with a control using Dunnett's Method

### Oneway Analysis of Hydroxylamine By Label

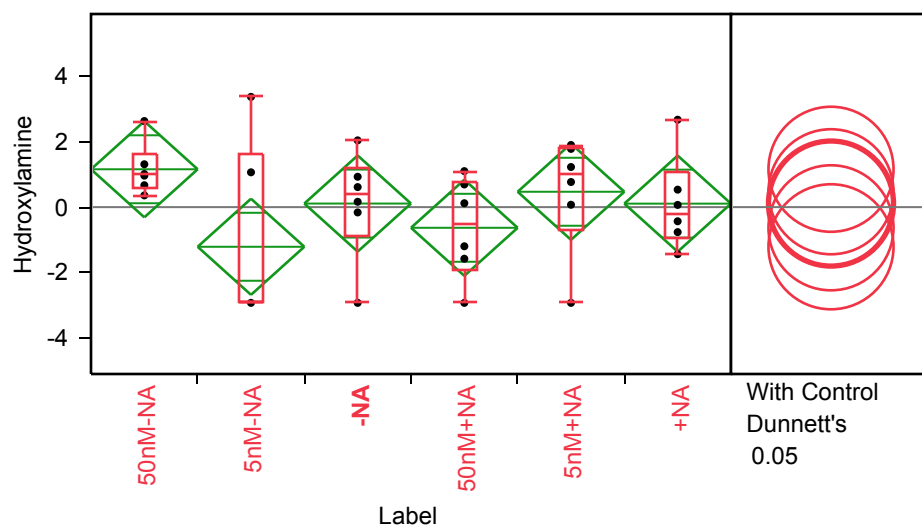

### Quantiles

| Level   | Minimum  | 10%      | 25%      | Median   | 75%      | 90%      | Maximum  |
|---------|----------|----------|----------|----------|----------|----------|----------|
| 50nM-NA | 0.356315 | 0.356315 | 0.588245 | 0.980738 | 1.630286 | 2.615176 | 2.615176 |
| 5nM-NA  | -2.90823 | -2.90823 | -2.90823 | -2.90818 | 1.630733 | 3.349005 | 3.349005 |
| -NA     | -2.90824 | -2.90824 | -0.84785 | 0.38551  | 1.199078 | 2.027783 | 2.027783 |
| 50nM+NA | -2.90831 | -2.90831 | -1.90259 | -0.53543 | 0.789628 | 1.093404 | 1.093404 |
| 5nM+NA  | -2.90832 | -2.90832 | -0.673   | 0.990872 | 1.798883 | 1.887163 | 1.887163 |
| +NA     | -1.42909 | -1.42909 | -0.92654 | -0.18145 | 1.062158 | 2.655594 | 2.655594 |

### Oneway Anova

#### Summary of Fit

|                            |          |
|----------------------------|----------|
| Rsquare                    | 0.181888 |
| Adj Rsquare                | 0.045536 |
| Root Mean Square Error     | 1.750907 |
| Mean of Response           | -4.6e-17 |
| Observations (or Sum Wgts) | 36       |

#### Analysis of Variance

| Source   | DF | Sum of Squares | Mean Square | F Ratio | Prob > F |
|----------|----|----------------|-------------|---------|----------|
| Label    | 5  | 20.44746       | 4.08949     | 1.3340  | 0.2769   |
| Error    | 30 | 91.97026       | 3.06568     |         |          |
| C. Total | 35 | 112.41773      |             |         |          |

#### Means for Oneway Anova

| Level   | Number | Mean    | Std Error | Lower 95% | Upper 95% |
|---------|--------|---------|-----------|-----------|-----------|
| 50nM-NA | 6      | 1.1501  | 0.71480   | -0.310    | 2.6099    |
| 5nM-NA  | 6      | -1.2043 | 0.71480   | -2.664    | 0.2555    |
| -NA     | 6      | 0.1087  | 0.71480   | -1.351    | 1.5686    |
| 50nM+NA | 6      | -0.6275 | 0.71480   | -2.087    | 0.8324    |
| 5nM+NA  | 6      | 0.4670  | 0.71480   | -0.993    | 1.9268    |
| +NA     | 6      | 0.1059  | 0.71480   | -1.354    | 1.5658    |

Std Error uses a pooled estimate of error variance

### Means Comparisons

#### Comparisons with a control using Dunnett's Method

### Oneway Analysis of hydroxyphenylpyruvate By Label

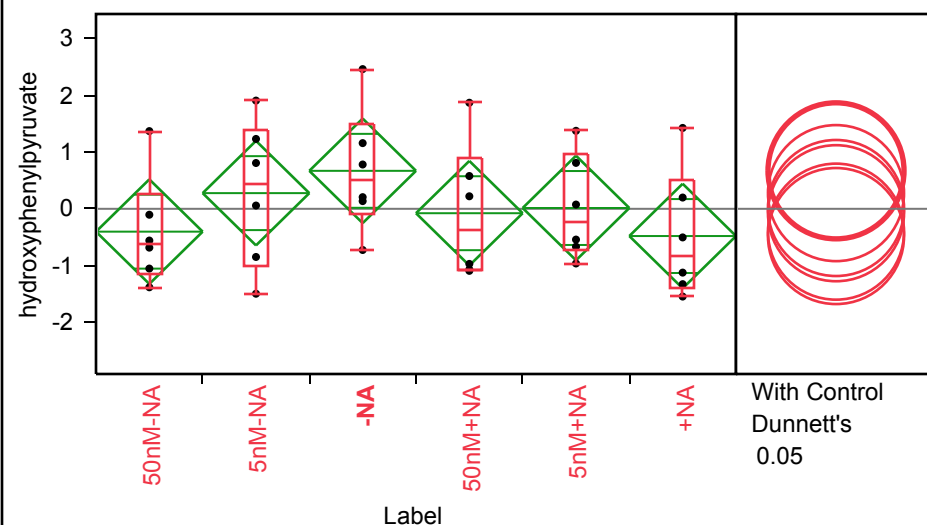

#### Quantiles

| Level   | Minimum  | 10%      | 25%      | Median   | 75%      | 90%      | Maximum  |
|---------|----------|----------|----------|----------|----------|----------|----------|
| 50nM-NA | -1.37977 | -1.37977 | -1.13288 | -0.62036 | 0.263373 | 1.3661   | 1.3661   |
| 5nM-NA  | -1.4927  | -1.4927  | -1.00815 | 0.431298 | 1.396975 | 1.90258  | 1.90258  |
| -NA     | -0.72407 | -0.72407 | -0.0794  | 0.491917 | 1.480216 | 2.456141 | 2.456141 |
| 50nM+NA | -1.0906  | -1.0906  | -1.07258 | -0.37431 | 0.898592 | 1.86477  | 1.86477  |
| 5nM+NA  | -0.96092 | -0.96092 | -0.73992 | -0.23312 | 0.94836  | 1.371255 | 1.371255 |
| +NA     | -1.54279 | -1.54279 | -1.37922 | -0.8123  | 0.503996 | 1.421881 | 1.421881 |

#### Oneway Anova

##### Summary of Fit

|                            |          |
|----------------------------|----------|
| Rsquare                    | 0.131286 |
| Adj Rsquare                | -0.0135  |
| Root Mean Square Error     | 1.102473 |
| Mean of Response           | -1.2e-17 |
| Observations (or Sum Wgts) | 36       |

##### Analysis of Variance

| Source   | DF | Sum of Squares | Mean Square | F Ratio | Prob > F |
|----------|----|----------------|-------------|---------|----------|
| Label    | 5  | 5.510603       | 1.10212     | 0.9068  | 0.4897   |
| Error    | 30 | 36.463431      | 1.21545     |         |          |
| C. Total | 35 | 41.974034      |             |         |          |

##### Means for Oneway Anova

| Level   | Number | Mean     | Std Error | Lower 95% | Upper 95% |
|---------|--------|----------|-----------|-----------|-----------|
| 50nM-NA | 6      | -0.40153 | 0.45008   | -1.321    | 0.5177    |
| 5nM-NA  | 6      | 0.27571  | 0.45008   | -0.643    | 1.1949    |
| -NA     | 6      | 0.66772  | 0.45008   | -0.251    | 1.5869    |
| 50nM+NA | 6      | -0.07742 | 0.45008   | -0.997    | 0.8418    |
| 5nM+NA  | 6      | 0.01421  | 0.45008   | -0.905    | 0.9334    |
| +NA     | 6      | -0.47869 | 0.45008   | -1.398    | 0.4405    |

Std Error uses a pooled estimate of error variance

#### Means Comparisons

##### Comparisons with a control using Dunnett's Method

### Oneway Analysis of hydroxyproline By Label

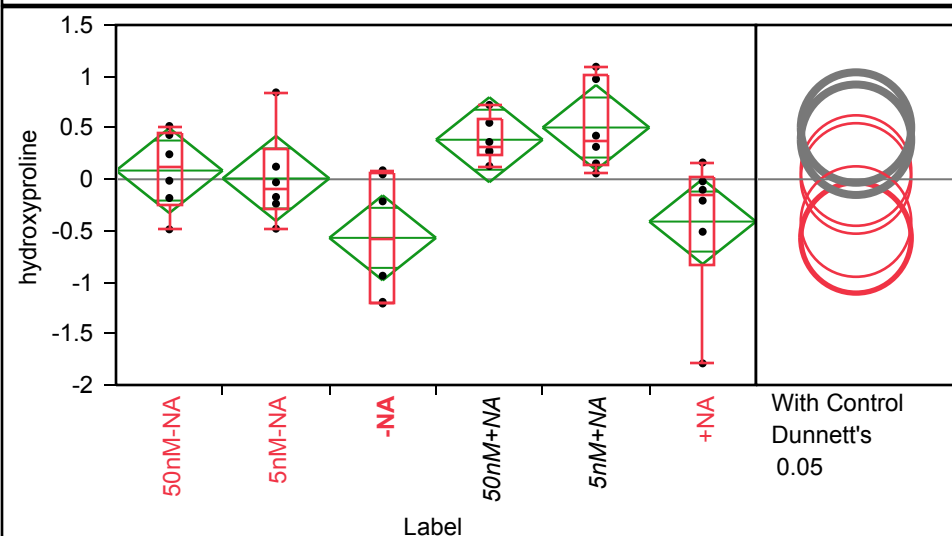

### Quantiles

| Level   | Minimum  | 10%      | 25%      | Median   | 75%      | 90%      | Maximum  |
|---------|----------|----------|----------|----------|----------|----------|----------|
| 50nM-NA | -0.48669 | -0.48669 | -0.25814 | 0.114666 | 0.45238  | 0.517859 | 0.517859 |
| 5nM-NA  | -0.48039 | -0.48039 | -0.29806 | -0.10049 | 0.303252 | 0.844695 | 0.844695 |
| -NA     | -1.208   | -1.208   | -1.19597 | -0.57618 | 0.057737 | 0.087113 | 0.087113 |
| 50nM+NA | 0.128504 | 0.128504 | 0.230966 | 0.320636 | 0.592397 | 0.723025 | 0.723025 |
| 5nM+NA  | 0.057384 | 0.057384 | 0.129749 | 0.369825 | 1.004346 | 1.094039 | 1.094039 |
| +NA     | -1.78979 | -1.78979 | -0.83009 | -0.15514 | 0.025868 | 0.163425 | 0.163425 |

### Oneway Anova

#### Summary of Fit

|                            |          |
|----------------------------|----------|
| Rsquare                    | 0.423957 |
| Adj Rsquare                | 0.32795  |
| Root Mean Square Error     | 0.495017 |
| Mean of Response           | -8.3e-10 |
| Observations (or Sum Wgts) | 36       |

#### Analysis of Variance

| Source   | DF | Sum of Squares | Mean Square | F Ratio | Prob > F |
|----------|----|----------------|-------------|---------|----------|
| Label    | 5  | 5.410399       | 1.08208     | 4.4159  | 0.0039 * |
| Error    | 30 | 7.351266       | 0.24504     |         |          |
| C. Total | 35 | 12.761665      |             |         |          |

#### Means for Oneway Anova

| Level   | Number | Mean     | Std Error | Lower 95% | Upper 95% |
|---------|--------|----------|-----------|-----------|-----------|
| 50nM-NA | 6      | 0.08485  | 0.20209   | -0.3279   | 0.4976    |
| 5nM-NA  | 6      | 0.00814  | 0.20209   | -0.4046   | 0.4209    |
| -NA     | 6      | -0.56954 | 0.20209   | -0.9823   | -0.1568   |
| 50nM+NA | 6      | 0.38446  | 0.20209   | -0.0283   | 0.7972    |
| 5nM+NA  | 6      | 0.50323  | 0.20209   | 0.0905    | 0.9160    |
| +NA     | 6      | -0.41114 | 0.20209   | -0.8239   | 0.0016    |

Std Error uses a pooled estimate of error variance

### Means Comparisons

#### Comparisons with a control using Dunnett's Method

### Oneway Analysis of IDP By Label

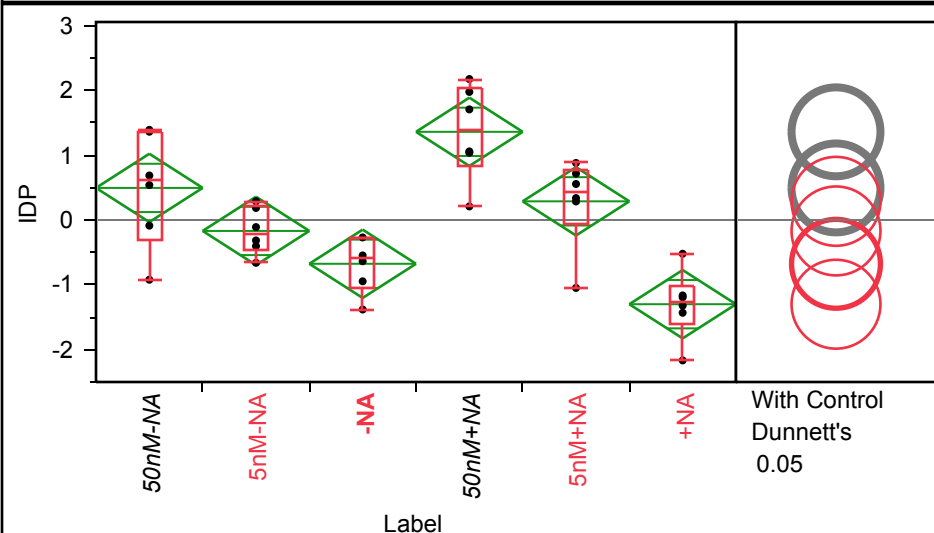

### Quantiles

| Level   | Minimum  | 10%      | 25%      | Median   | 75%      | 90%      | Maximum  |
|---------|----------|----------|----------|----------|----------|----------|----------|
| 50nM-NA | -0.92141 | -0.92141 | -0.29564 | 0.612922 | 1.369479 | 1.390958 | 1.390958 |
| 5nM-NA  | -0.66069 | -0.66069 | -0.46703 | -0.2125  | 0.211969 | 0.289657 | 0.289657 |
| -NA     | -1.38136 | -1.38136 | -1.055   | -0.59192 | -0.27226 | -0.26917 | -0.26917 |
| 50nM+NA | 0.209471 | 0.209471 | 0.830978 | 1.382597 | 2.026167 | 2.175191 | 2.175191 |
| 5nM+NA  | -1.04806 | -1.04806 | -0.04719 | 0.447102 | 0.756666 | 0.88056  | 0.88056  |
| +NA     | -2.16651 | -2.16651 | -1.61537 | -1.25689 | -1.00355 | -0.52098 | -0.52098 |

### Oneway Anova

#### Summary of Fit

|                            |          |
|----------------------------|----------|
| Rsquare                    | 0.685313 |
| Adj Rsquare                | 0.632866 |
| Root Mean Square Error     | 0.632314 |
| Mean of Response           | 5.56e-10 |
| Observations (or Sum Wgts) | 36       |

#### Analysis of Variance

| Source   | DF | Sum of Squares | Mean Square | F Ratio | Prob > F |
|----------|----|----------------|-------------|---------|----------|
| Label    | 5  | 26.121512      | 5.22430     | 13.0666 | <.0001 * |
| Error    | 30 | 11.994645      | 0.39982     |         |          |
| C. Total | 35 | 38.116157      |             |         |          |

#### Means for Oneway Anova

| Level   | Number | Mean    | Std Error | Lower 95% | Upper 95% |
|---------|--------|---------|-----------|-----------|-----------|
| 50nM-NA | 6      | 0.4951  | 0.25814   | -0.032    | 1.022     |
| 5nM-NA  | 6      | -0.1687 | 0.25814   | -0.696    | 0.358     |
| -NA     | 6      | -0.6756 | 0.25814   | -1.203    | -0.148    |
| 50nM+NA | 6      | 1.3607  | 0.25814   | 0.834     | 1.888     |
| 5nM+NA  | 6      | 0.2881  | 0.25814   | -0.239    | 0.815     |
| +NA     | 6      | -1.2996 | 0.25814   | -1.827    | -0.772    |

Std Error uses a pooled estimate of error variance

### Means Comparisons

#### Comparisons with a control using Dunnett's Method

### Oneway Analysis of Imidazoleacetic acid By Label

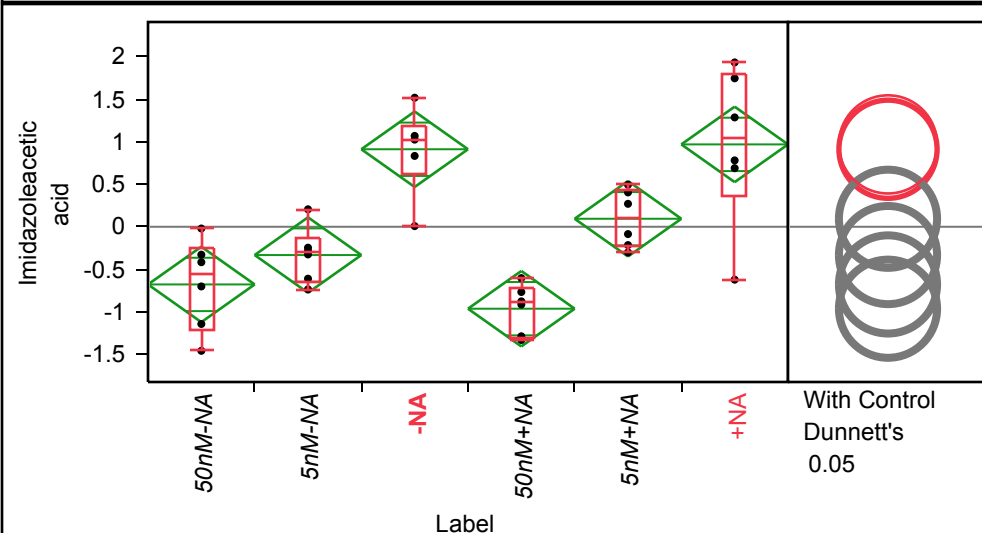

### Quantiles

| Level   | Minimum  | 10%      | 25%      | Median   | 75%      | 90%      | Maximum  |
|---------|----------|----------|----------|----------|----------|----------|----------|
| 50nM-NA | -1.45894 | -1.45894 | -1.22216 | -0.5593  | -0.25125 | -0.02059 | -0.02059 |
| 5nM-NA  | -0.73543 | -0.73543 | -0.64176 | -0.30479 | -0.13315 | 0.205416 | 0.205416 |
| -NA     | 0.007729 | 0.007729 | 0.62688  | 1.021149 | 1.180975 | 1.517922 | 1.517922 |
| 50nM+NA | -1.33171 | -1.33171 | -1.29904 | -0.89571 | -0.72635 | -0.6036  | -0.6036  |
| 5nM+NA  | -0.30137 | -0.30137 | -0.23699 | 0.091949 | 0.426615 | 0.49406  | 0.49406  |
| +NA     | -0.6221  | -0.6221  | 0.361357 | 1.033371 | 1.792756 | 1.932845 | 1.932845 |

### Oneway Anova

#### Summary of Fit

|                            |          |
|----------------------------|----------|
| Rsquare                    | 0.6983   |
| Adj Rsquare                | 0.648017 |
| Root Mean Square Error     | 0.532207 |
| Mean of Response           | 2.47e-17 |
| Observations (or Sum Wgts) | 36       |

#### Analysis of Variance

| Source   | DF | Sum of Squares | Mean Square | F Ratio | Prob > F |
|----------|----|----------------|-------------|---------|----------|
| Label    | 5  | 19.667547      | 3.93351     | 13.8873 | <.0001 * |
| Error    | 30 | 8.497330       | 0.28324     |         |          |
| C. Total | 35 | 28.164878      |             |         |          |

#### Means for Oneway Anova

| Level   | Number | Mean     | Std Error | Lower 95% | Upper 95% |
|---------|--------|----------|-----------|-----------|-----------|
| 50nM-NA | 6      | -0.67825 | 0.21727   | -1.122    | -0.235    |
| 5nM-NA  | 6      | -0.33269 | 0.21727   | -0.776    | 0.111     |
| -NA     | 6      | 0.91165  | 0.21727   | 0.468     | 1.355     |
| 50nM+NA | 6      | -0.96369 | 0.21727   | -1.407    | -0.520    |
| 5nM+NA  | 6      | 0.09420  | 0.21727   | -0.350    | 0.538     |
| +NA     | 6      | 0.96879  | 0.21727   | 0.525     | 1.413     |

Std Error uses a pooled estimate of error variance

### Means Comparisons

#### Comparisons with a control using Dunnett's Method

### Oneway Analysis of IMP By Label

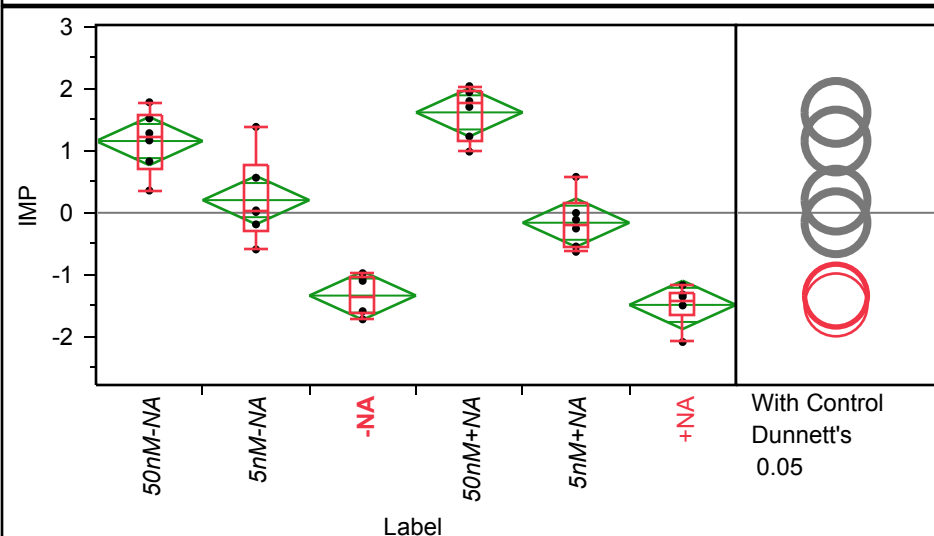

### Quantiles

| Level   | Minimum  | 10%      | 25%      | Median   | 75%      | 90%      | Maximum  |
|---------|----------|----------|----------|----------|----------|----------|----------|
| 50nM-NA | 0.358518 | 0.358518 | 0.710882 | 1.225074 | 1.587062 | 1.782003 | 1.782003 |
| 5nM-NA  | -0.59035 | -0.59035 | -0.2877  | 0.026074 | 0.770412 | 1.385265 | 1.385265 |
| -NA     | -1.71782 | -1.71782 | -1.62158 | -1.34181 | -1.02681 | -0.97379 | -0.97379 |
| 50nM+NA | 0.986201 | 0.986201 | 1.169468 | 1.754325 | 1.969526 | 2.041595 | 2.041595 |
| 5nM+NA  | -0.62901 | -0.62901 | -0.56504 | -0.18277 | 0.143192 | 0.579272 | 0.579272 |
| +NA     | -2.08297 | -2.08297 | -1.64121 | -1.42343 | -1.28024 | -1.16723 | -1.16723 |

### Oneway Anova

#### Summary of Fit

|                            |          |
|----------------------------|----------|
| Rsquare                    | 0.88031  |
| Adj Rsquare                | 0.860361 |
| Root Mean Square Error     | 0.466782 |
| Mean of Response           | 4.93e-17 |
| Observations (or Sum Wgts) | 36       |

#### Analysis of Variance

| Source   | DF | Sum of Squares | Mean Square | F Ratio | Prob > F |
|----------|----|----------------|-------------|---------|----------|
| Label    | 5  | 48.075701      | 9.61514     | 44.1294 | <.0001 * |
| Error    | 30 | 6.536560       | 0.21789     |         |          |
| C. Total | 35 | 54.612261      |             |         |          |

#### Means for Oneway Anova

| Level   | Number | Mean    | Std Error | Lower 95% | Upper 95% |
|---------|--------|---------|-----------|-----------|-----------|
| 50nM-NA | 6      | 1.1568  | 0.19056   | 0.768     | 1.546     |
| 5nM-NA  | 6      | 0.2043  | 0.19056   | -0.185    | 0.593     |
| -NA     | 6      | -1.3349 | 0.19056   | -1.724    | -0.946    |
| 50nM+NA | 6      | 1.6188  | 0.19056   | 1.230     | 2.008     |
| 5nM+NA  | 6      | -0.1602 | 0.19056   | -0.549    | 0.229     |
| +NA     | 6      | -1.4848 | 0.19056   | -1.874    | -1.096    |

Std Error uses a pooled estimate of error variance

### Means Comparisons

#### Comparisons with a control using Dunnett's Method

### Oneway Analysis of indole By Label

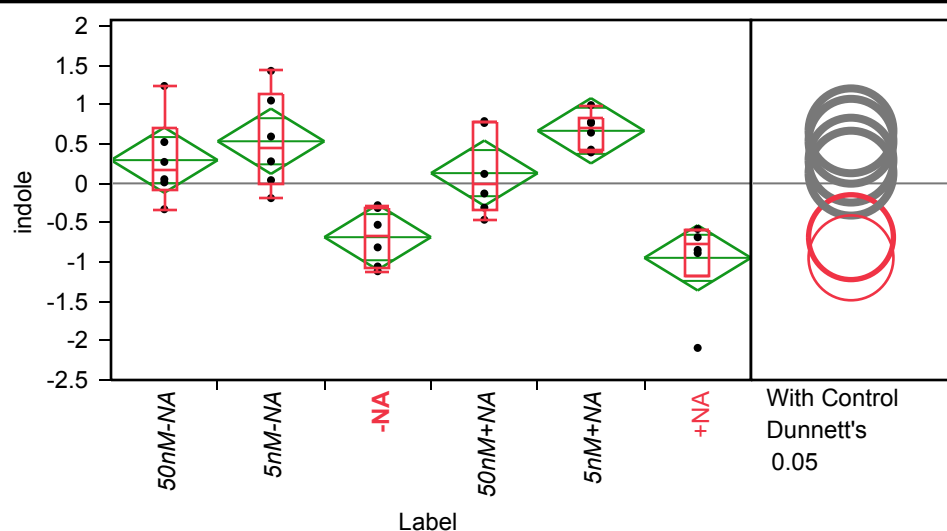

### Quantiles

| Level   | Minimum  | 10%      | 25%      | Median   | 75%      | 90%      | Maximum  |
|---------|----------|----------|----------|----------|----------|----------|----------|
| 50nM-NA | -0.32879 | -0.32879 | -0.07273 | 0.16321  | 0.704116 | 1.238955 | 1.238955 |
| 5nM-NA  | -0.18749 | -0.18749 | -0.01613 | 0.437952 | 1.148042 | 1.430902 | 1.430902 |
| -NA     | -1.11692 | -1.11692 | -1.07173 | -0.67006 | -0.30395 | -0.27771 | -0.27771 |
| 50nM+NA | -0.46206 | -0.46206 | -0.34666 | -0.00374 | 0.774324 | 0.79188  | 0.79188  |
| 5nM+NA  | 0.393845 | 0.393845 | 0.420236 | 0.706154 | 0.83505  | 0.995396 | 0.995396 |
| +NA     | -2.09193 | -2.09193 | -1.18785 | -0.7654  | -0.58796 | -0.57995 | -0.57995 |

### Oneway Anova

#### Summary of Fit

|                            |          |
|----------------------------|----------|
| Rsquare                    | 0.640362 |
| Adj Rsquare                | 0.580423 |
| Root Mean Square Error     | 0.4974   |
| Mean of Response           | -2.8e-10 |
| Observations (or Sum Wgts) | 36       |

#### Analysis of Variance

| Source   | DF | Sum of Squares | Mean Square | F Ratio | Prob > F |
|----------|----|----------------|-------------|---------|----------|
| Label    | 5  | 13.215795      | 2.64316     | 10.6835 | <.0001 * |
| Error    | 30 | 7.422196       | 0.24741     |         |          |
| C. Total | 35 | 20.637992      |             |         |          |

#### Means for Oneway Anova

| Level   | Number | Mean     | Std Error | Lower 95% | Upper 95% |
|---------|--------|----------|-----------|-----------|-----------|
| 50nM-NA | 6      | 0.29584  | 0.20306   | -0.119    | 0.711     |
| 5nM-NA  | 6      | 0.53568  | 0.20306   | 0.121     | 0.950     |
| -NA     | 6      | -0.68402 | 0.20306   | -1.099    | -0.269    |
| 50nM+NA | 6      | 0.13044  | 0.20306   | -0.284    | 0.545     |
| 5nM+NA  | 6      | 0.66870  | 0.20306   | 0.254     | 1.083     |
| +NA     | 6      | -0.94663 | 0.20306   | -1.361    | -0.532    |

Std Error uses a pooled estimate of error variance

### Means Comparisons

#### Comparisons with a control using Dunnett's Method

### Oneway Analysis of Indole-3-carboxylic acid By Label

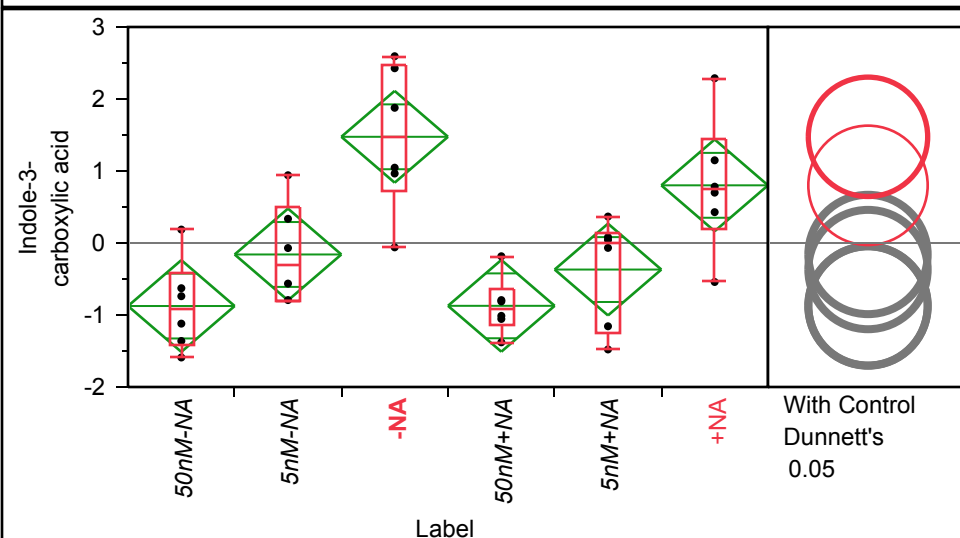

### Quantiles

| Level   | Minimum  | 10%      | 25%      | Median   | 75%      | 90%      | Maximum  |
|---------|----------|----------|----------|----------|----------|----------|----------|
| 50nM-NA | -1.59005 | -1.59005 | -1.41836 | -0.9294  | -0.42444 | 0.186262 | 0.186262 |
| 5nM-NA  | -0.8063  | -0.8063  | -0.79612 | -0.31694 | 0.48718  | 0.940789 | 0.940789 |
| -NA     | -0.06025 | -0.06025 | 0.708731 | 1.461897 | 2.46879  | 2.593926 | 2.593926 |
| 50nM+NA | -1.37947 | -1.37947 | -1.13604 | -0.91184 | -0.64088 | -0.18423 | -0.18423 |
| 5nM+NA  | -1.47846 | -1.47846 | -1.23724 | -0.01243 | 0.152238 | 0.36722  | 0.36722  |
| +NA     | -0.54149 | -0.54149 | 0.185936 | 0.740883 | 1.43369  | 2.288602 | 2.288602 |

### Oneway Anova

#### Summary of Fit

|                            |          |
|----------------------------|----------|
| Rsquare                    | 0.606813 |
| Adj Rsquare                | 0.541282 |
| Root Mean Square Error     | 0.764148 |
| Mean of Response           | -7.4e-17 |
| Observations (or Sum Wgts) | 36       |

#### Analysis of Variance

| Source   | DF | Sum of Squares | Mean Square | F Ratio | Prob > F |
|----------|----|----------------|-------------|---------|----------|
| Label    | 5  | 27.035334      | 5.40707     | 9.2599  | <.0001 * |
| Error    | 30 | 17.517671      | 0.58392     |         |          |
| C. Total | 35 | 44.553004      |             |         |          |

#### Means for Oneway Anova

| Level   | Number | Mean    | Std Error | Lower 95% | Upper 95% |
|---------|--------|---------|-----------|-----------|-----------|
| 50nM-NA | 6      | -0.8753 | 0.31196   | -1.512    | -0.238    |
| 5nM-NA  | 6      | -0.1594 | 0.31196   | -0.796    | 0.478     |
| -NA     | 6      | 1.4749  | 0.31196   | 0.838     | 2.112     |
| 50nM+NA | 6      | -0.8726 | 0.31196   | -1.510    | -0.235    |
| 5nM+NA  | 6      | -0.3687 | 0.31196   | -1.006    | 0.268     |
| +NA     | 6      | 0.8010  | 0.31196   | 0.164     | 1.438     |

Std Error uses a pooled estimate of error variance

### Means Comparisons

#### Comparisons with a control using Dunnett's Method

### Oneway Analysis of Indoleacrylic acid By Label

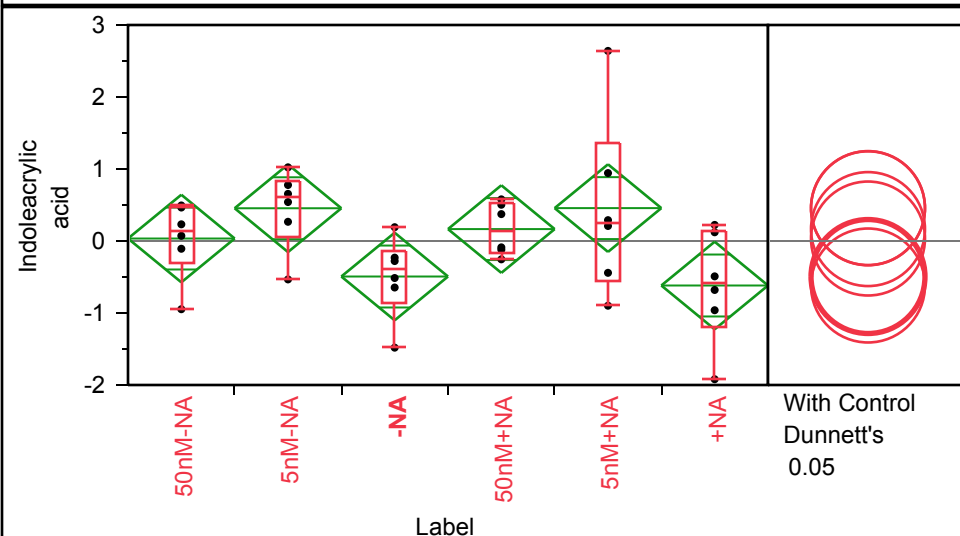

### Quantiles

| Level   | Minimum  | 10%      | 25%      | Median   | 75%      | 90%      | Maximum  |
|---------|----------|----------|----------|----------|----------|----------|----------|
| 50nM-NA | -0.94755 | -0.94755 | -0.31776 | 0.151871 | 0.471961 | 0.493348 | 0.493348 |
| 5nM-NA  | -0.53357 | -0.53357 | 0.066643 | 0.597815 | 0.838781 | 1.02236  | 1.02236  |
| -NA     | -1.48144 | -1.48144 | -0.85493 | -0.39639 | -0.12549 | 0.191641 | 0.191641 |
| 50nM+NA | -0.25472 | -0.25472 | -0.15338 | 0.142522 | 0.522269 | 0.578258 | 0.578258 |
| 5nM+NA  | -0.89884 | -0.89884 | -0.55624 | 0.248948 | 1.367532 | 2.640111 | 2.640111 |
| +NA     | -1.92004 | -1.92004 | -1.20119 | -0.58561 | 0.146679 | 0.223247 | 0.223247 |

### Oneway Anova

#### Summary of Fit

|                            |          |
|----------------------------|----------|
| Rsquare                    | 0.286649 |
| Adj Rsquare                | 0.167757 |
| Root Mean Square Error     | 0.729551 |
| Mean of Response           | 8.33e-10 |
| Observations (or Sum Wgts) | 36       |

#### Analysis of Variance

| Source   | DF | Sum of Squares | Mean Square | F Ratio | Prob > F |
|----------|----|----------------|-------------|---------|----------|
| Label    | 5  | 6.416220       | 1.28324     | 2.4110  | 0.0595   |
| Error    | 30 | 15.967340      | 0.53224     |         |          |
| C. Total | 35 | 22.383560      |             |         |          |

#### Means for Oneway Anova

| Level   | Number | Mean     | Std Error | Lower 95% | Upper 95% |
|---------|--------|----------|-----------|-----------|-----------|
| 50nM-NA | 6      | 0.03442  | 0.29784   | -0.574    | 0.643     |
| 5nM-NA  | 6      | 0.45479  | 0.29784   | -0.153    | 1.063     |
| -NA     | 6      | -0.49331 | 0.29784   | -1.102    | 0.115     |
| 50nM+NA | 6      | 0.16543  | 0.29784   | -0.443    | 0.774     |
| 5nM+NA  | 6      | 0.45674  | 0.29784   | -0.152    | 1.065     |
| +NA     | 6      | -0.61807 | 0.29784   | -1.226    | -0.0098   |

Std Error uses a pooled estimate of error variance

### Means Comparisons

#### Comparisons with a control using Dunnett's Method

### Oneway Analysis of inosine By Label

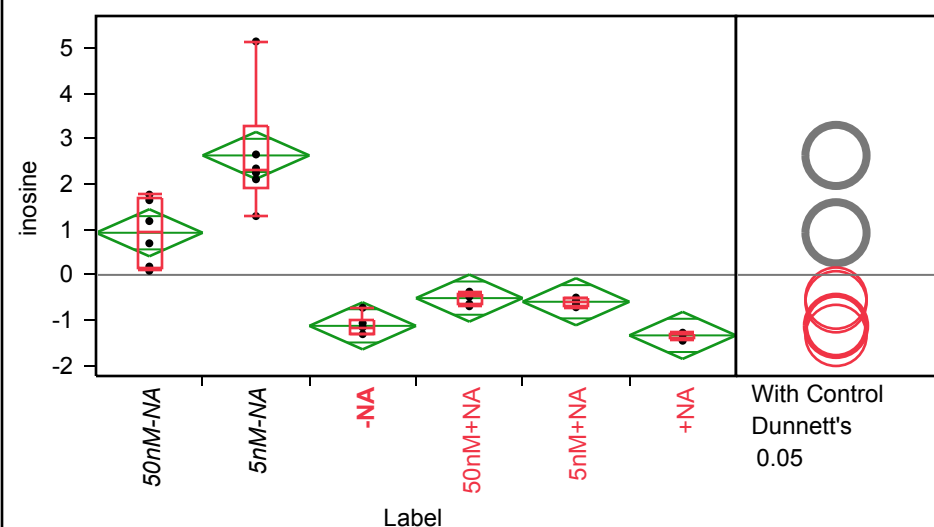

### Quantiles

| Level   | Minimum  | 10%      | 25%      | Median   | 75%      | 90%      | Maximum  |
|---------|----------|----------|----------|----------|----------|----------|----------|
| 50nM-NA | 0.089975 | 0.089975 | 0.159784 | 0.941052 | 1.677092 | 1.768554 | 1.768554 |
| 5nM-NA  | 1.295879 | 1.295879 | 1.904558 | 2.297163 | 3.276728 | 5.144731 | 5.144731 |
| -NA     | -1.31656 | -1.31656 | -1.30899 | -1.16456 | -0.97927 | -0.72385 | -0.72385 |
| 50nM+NA | -0.69116 | -0.69116 | -0.65075 | -0.48025 | -0.40168 | -0.3709  | -0.3709  |
| 5nM+NA  | -0.71345 | -0.71345 | -0.67755 | -0.58643 | -0.50117 | -0.50005 | -0.50005 |
| +NA     | -1.45108 | -1.45108 | -1.40732 | -1.29812 | -1.28352 | -1.27444 | -1.27444 |

### Oneway Anova

#### Summary of Fit

|                            |          |
|----------------------------|----------|
| Rsquare                    | 0.855672 |
| Adj Rsquare                | 0.831617 |
| Root Mean Square Error     | 0.6214   |
| Mean of Response           | -5.6e-10 |
| Observations (or Sum Wgts) | 36       |

#### Analysis of Variance

| Source   | DF | Sum of Squares | Mean Square | F Ratio | Prob > F |
|----------|----|----------------|-------------|---------|----------|
| Label    | 5  | 68.678164      | 13.7356     | 35.5719 | <.0001 * |
| Error    | 30 | 11.584123      | 0.3861      |         |          |
| C. Total | 35 | 80.262287      |             |         |          |

#### Means for Oneway Anova

| Level   | Number | Mean    | Std Error | Lower 95% | Upper 95% |
|---------|--------|---------|-----------|-----------|-----------|
| 50nM-NA | 6      | 0.9284  | 0.25369   | 0.410     | 1.446     |
| 5nM-NA  | 6      | 2.6327  | 0.25369   | 2.115     | 3.151     |
| -NA     | 6      | -1.1234 | 0.25369   | -1.641    | -0.605    |
| 50nM+NA | 6      | -0.5120 | 0.25369   | -1.030    | 0.00613   |
| 5nM+NA  | 6      | -0.5923 | 0.25369   | -1.110    | -0.074    |
| +NA     | 6      | -1.3335 | 0.25369   | -1.852    | -0.815    |

Std Error uses a pooled estimate of error variance

### Means Comparisons

#### Comparisons with a control using Dunnett's Method

### Oneway Analysis of isocitrate By Label

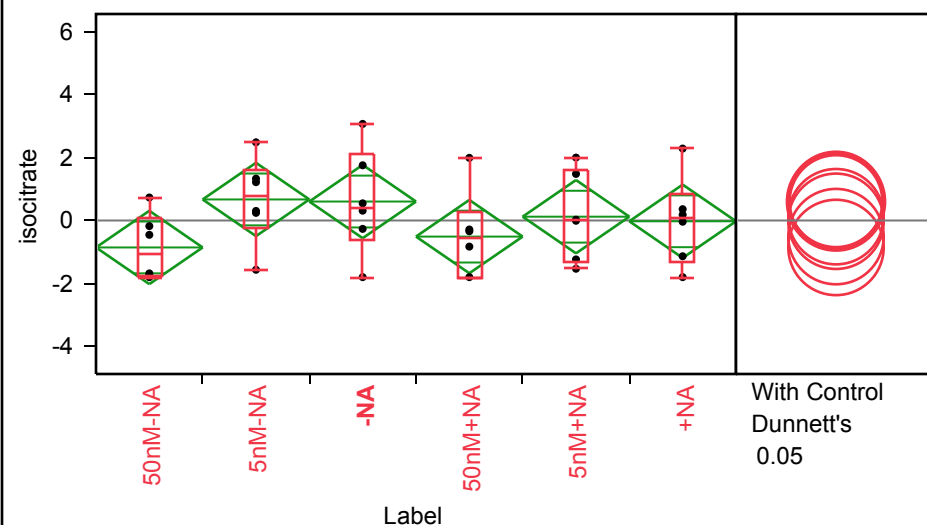

### Quantiles

| Level   | Minimum  | 10%      | 25%      | Median   | 75%      | 90%      | Maximum  |
|---------|----------|----------|----------|----------|----------|----------|----------|
| 50nM-NA | -1.79541 | -1.79541 | -1.76125 | -1.06529 | 0.04909  | 0.728292 | 0.728292 |
| 5nM-NA  | -1.56152 | -1.56152 | -0.20895 | 0.758671 | 1.614567 | 2.477935 | 2.477935 |
| -NA     | -1.79535 | -1.79535 | -0.64844 | 0.427554 | 2.077753 | 3.061227 | 3.061227 |
| 50nM+NA | -1.79546 | -1.79546 | -1.79543 | -0.58449 | 0.281865 | 1.984964 | 1.984964 |
| 5nM+NA  | -1.52868 | -1.52868 | -1.30746 | 0.008809 | 1.605758 | 1.99351  | 1.99351  |
| +NA     | -1.79537 | -1.79537 | -1.29893 | 0.071702 | 0.839196 | 2.27944  | 2.27944  |

### Oneway Anova

#### Summary of Fit

|                            |          |
|----------------------------|----------|
| Rsquare                    | 0.157242 |
| Adj Rsquare                | 0.016783 |
| Root Mean Square Error     | 1.393264 |
| Mean of Response           | 6.17e-18 |
| Observations (or Sum Wgts) | 36       |

#### Analysis of Variance

| Source   | DF | Sum of Squares | Mean Square | F Ratio | Prob > F |
|----------|----|----------------|-------------|---------|----------|
| Label    | 5  | 10.865631      | 2.17313     | 1.1195  | 0.3712   |
| Error    | 30 | 58.235506      | 1.94118     |         |          |
| C. Total | 35 | 69.101138      |             |         |          |

#### Means for Oneway Anova

| Level   | Number | Mean     | Std Error | Lower 95% | Upper 95% |
|---------|--------|----------|-----------|-----------|-----------|
| 50nM-NA | 6      | -0.85414 | 0.56880   | -2.016    | 0.3075    |
| 5nM-NA  | 6      | 0.66707  | 0.56880   | -0.495    | 1.8287    |
| -NA     | 6      | 0.60080  | 0.56880   | -0.561    | 1.7624    |
| 50nM+NA | 6      | -0.51012 | 0.56880   | -1.672    | 0.6515    |
| 5nM+NA  | 6      | 0.12087  | 0.56880   | -1.041    | 1.2825    |
| +NA     | 6      | -0.02448 | 0.56880   | -1.186    | 1.1372    |

Std Error uses a pooled estimate of error variance

### Means Comparisons

#### Comparisons with a control using Dunnett's Method

### Oneway Analysis of Isoleucine By Label

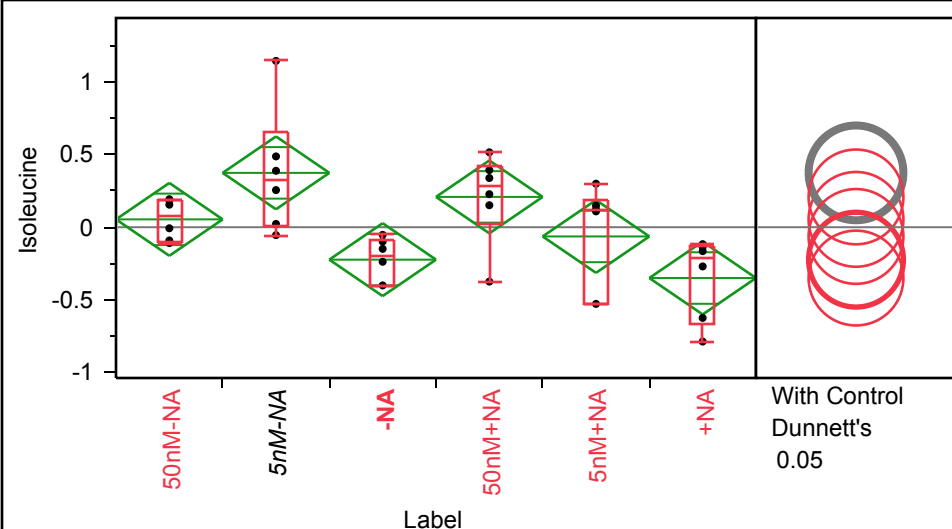

### Quantiles

| Level   | Minimum  | 10%      | 25%      | Median   | 75%      | 90%      | Maximum  |
|---------|----------|----------|----------|----------|----------|----------|----------|
| 50nM-NA | -0.10923 | -0.10923 | -0.09585 | 0.073898 | 0.18632  | 0.192968 | 0.192968 |
| 5nM-NA  | -0.05452 | -0.05452 | 0.003261 | 0.322243 | 0.652205 | 1.145669 | 1.145669 |
| -NA     | -0.40111 | -0.40111 | -0.40097 | -0.19363 | -0.0873  | -0.05259 | -0.05259 |
| 50nM+NA | -0.3746  | -0.3746  | 0.019938 | 0.283109 | 0.424121 | 0.516092 | 0.516092 |
| 5nM+NA  | -0.53391 | -0.53391 | -0.52965 | 0.116114 | 0.186606 | 0.299607 | 0.299607 |
| +NA     | -0.78774 | -0.78774 | -0.66558 | -0.21755 | -0.13116 | -0.11706 | -0.11706 |

### Oneway Anova

#### Summary of Fit

|                            |          |
|----------------------------|----------|
| Rsquare                    | 0.445011 |
| Adj Rsquare                | 0.352513 |
| Root Mean Square Error     | 0.300969 |
| Mean of Response           | 5.56e-11 |
| Observations (or Sum Wgts) | 36       |

#### Analysis of Variance

| Source   | DF | Sum of Squares | Mean Square | F Ratio | Prob > F |
|----------|----|----------------|-------------|---------|----------|
| Label    | 5  | 2.1789743      | 0.435795    | 4.8110  | 0.0024 * |
| Error    | 30 | 2.7174760      | 0.090583    |         |          |
| C. Total | 35 | 4.8964503      |             |         |          |

#### Means for Oneway Anova

| Level   | Number | Mean     | Std Error | Lower 95% | Upper 95% |
|---------|--------|----------|-----------|-----------|-----------|
| 50nM-NA | 6      | 0.05404  | 0.12287   | -0.1969   | 0.3050    |
| 5nM-NA  | 6      | 0.37431  | 0.12287   | 0.1234    | 0.6252    |
| -NA     | 6      | -0.22346 | 0.12287   | -0.4744   | 0.0275    |
| 50nM+NA | 6      | 0.20877  | 0.12287   | -0.0422   | 0.4597    |
| 5nM+NA  | 6      | -0.06356 | 0.12287   | -0.3145   | 0.1874    |
| +NA     | 6      | -0.35010 | 0.12287   | -0.6010   | -0.0992   |

Std Error uses a pooled estimate of error variance

### Means Comparisons

#### Comparisons with a control using Dunnett's Method

### Oneway Analysis of Ketohehexanoic acid By Label

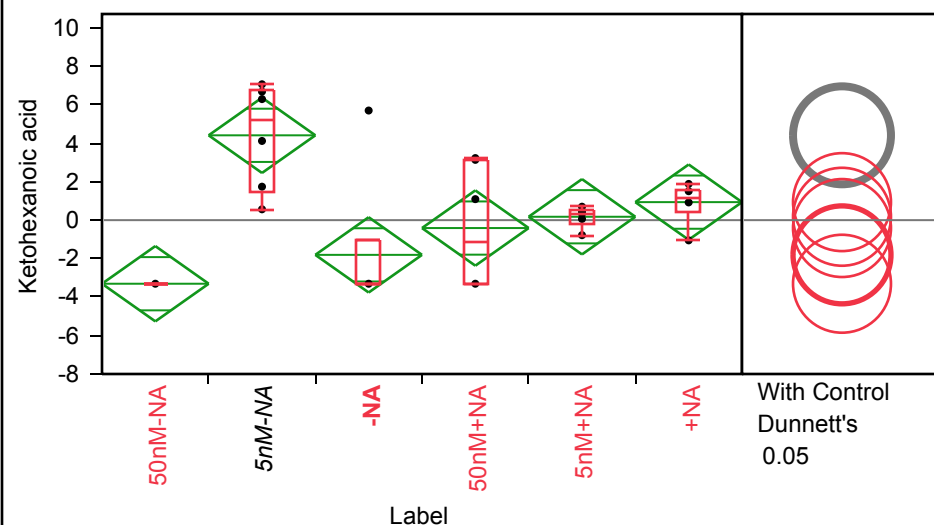

### Quantiles

| Level   | Minimum  | 10%      | 25%      | Median   | 75%      | 90%      | Maximum  |
|---------|----------|----------|----------|----------|----------|----------|----------|
| 50nM-NA | -3.31088 | -3.31088 | -3.31087 | -3.31086 | -3.31083 | -3.3108  | -3.3108  |
| 5nM-NA  | 0.564491 | 0.564491 | 1.447323 | 5.212808 | 6.788121 | 7.074387 | 7.074387 |
| -NA     | -3.31083 | -3.31083 | -3.31083 | -3.31081 | -1.05633 | 5.70705  | 5.70705  |
| 50nM+NA | -3.31087 | -3.31087 | -3.31086 | -1.10883 | 3.162229 | 3.230753 | 3.230753 |
| 5nM+NA  | -0.78138 | -0.78138 | -0.14957 | 0.315604 | 0.509474 | 0.699221 | 0.699221 |
| +NA     | -1.05285 | -1.05285 | 0.418991 | 1.189194 | 1.600948 | 1.884804 | 1.884804 |

### Oneway Anova

#### Summary of Fit

|                            |          |
|----------------------------|----------|
| Rsquare                    | 0.557537 |
| Adj Rsquare                | 0.483793 |
| Root Mean Square Error     | 2.35071  |
| Mean of Response           | -2.8e-10 |
| Observations (or Sum Wgts) | 36       |

#### Analysis of Variance

| Source   | DF | Sum of Squares | Mean Square | F Ratio | Prob > F |
|----------|----|----------------|-------------|---------|----------|
| Label    | 5  | 208.88898      | 41.7778     | 7.5604  | 0.0001 * |
| Error    | 30 | 165.77509      | 5.5258      |         |          |
| C. Total | 35 | 374.66407      |             |         |          |

#### Means for Oneway Anova

| Level   | Number | Mean    | Std Error | Lower 95% | Upper 95% |
|---------|--------|---------|-----------|-----------|-----------|
| 50nM-NA | 6      | -3.3108 | 0.95967   | -5.271    | -1.351    |
| 5nM-NA  | 6      | 4.4165  | 0.95967   | 2.457     | 6.376     |
| -NA     | 6      | -1.8078 | 0.95967   | -3.768    | 0.152     |
| 50nM+NA | 6      | -0.4115 | 0.95967   | -2.371    | 1.548     |
| 5nM+NA  | 6      | 0.1760  | 0.95967   | -1.784    | 2.136     |
| +NA     | 6      | 0.9377  | 0.95967   | -1.022    | 2.898     |

Std Error uses a pooled estimate of error variance

### Means Comparisons

#### Comparisons with a control using Dunnett's Method

### Oneway Analysis of Ketoleucine By Label

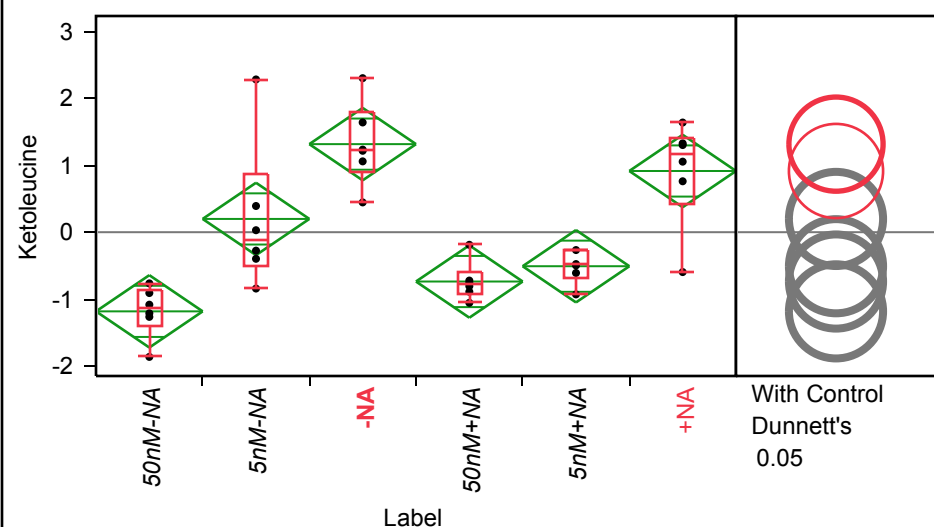

### Quantiles

| Level   | Minimum  | 10%      | 25%      | Median   | 75%      | 90%      | Maximum  |
|---------|----------|----------|----------|----------|----------|----------|----------|
| 50nM-NA | -1.86031 | -1.86031 | -1.41235 | -1.14529 | -0.87167 | -0.76368 | -0.76368 |
| 5nM-NA  | -0.84057 | -0.84057 | -0.50767 | -0.1228  | 0.862674 | 2.278405 | 2.278405 |
| -NA     | 0.444412 | 0.444412 | 0.903585 | 1.223028 | 1.802126 | 2.29753  | 2.29753  |
| 50nM+NA | -1.05376 | -1.05376 | -0.92963 | -0.78133 | -0.58831 | -0.18813 | -0.18813 |
| 5nM+NA  | -0.9278  | -0.9278  | -0.68808 | -0.48552 | -0.27085 | -0.26656 | -0.26656 |
| +NA     | -0.59487 | -0.59487 | 0.420958 | 1.176126 | 1.402737 | 1.63563  | 1.63563  |

### Oneway Anova

#### Summary of Fit

|                            |          |
|----------------------------|----------|
| Rsquare                    | 0.695655 |
| Adj Rsquare                | 0.644931 |
| Root Mean Square Error     | 0.647504 |
| Mean of Response           | 5.56e-10 |
| Observations (or Sum Wgts) | 36       |

#### Analysis of Variance

| Source   | DF | Sum of Squares | Mean Square | F Ratio | Prob > F |
|----------|----|----------------|-------------|---------|----------|
| Label    | 5  | 28.749723      | 5.74994     | 13.7145 | <.0001 * |
| Error    | 30 | 12.577825      | 0.41926     |         |          |
| C. Total | 35 | 41.327548      |             |         |          |

#### Means for Oneway Anova

| Level   | Number | Mean    | Std Error | Lower 95% | Upper 95% |
|---------|--------|---------|-----------|-----------|-----------|
| 50nM-NA | 6      | -1.1809 | 0.26434   | -1.721    | -0.641    |
| 5nM-NA  | 6      | 0.1977  | 0.26434   | -0.342    | 0.738     |
| -NA     | 6      | 1.3136  | 0.26434   | 0.774     | 1.853     |
| 50nM+NA | 6      | -0.7358 | 0.26434   | -1.276    | -0.196    |
| 5nM+NA  | 6      | -0.5076 | 0.26434   | -1.048    | 0.032     |
| +NA     | 6      | 0.9129  | 0.26434   | 0.373     | 1.453     |

Std Error uses a pooled estimate of error variance

### Means Comparisons

#### Comparisons with a control using Dunnett's Method

### Oneway Analysis of Kynurenic acid By Label

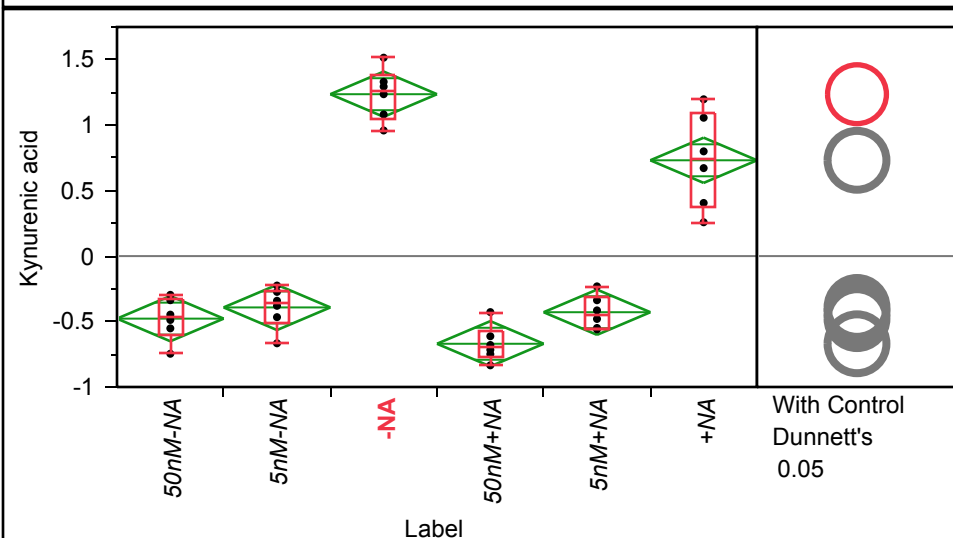

### Quantiles

| Level   | Minimum  | 10%      | 25%      | Median   | 75%      | 90%      | Maximum  |
|---------|----------|----------|----------|----------|----------|----------|----------|
| 50nM-NA | -0.74606 | -0.74606 | -0.60066 | -0.46759 | -0.32679 | -0.29614 | -0.29614 |
| 5nM-NA  | -0.66612 | -0.66612 | -0.5164  | -0.36065 | -0.26146 | -0.22521 | -0.22521 |
| -NA     | 0.959528 | 0.959528 | 1.051276 | 1.265735 | 1.377325 | 1.515564 | 1.515564 |
| 50nM+NA | -0.83444 | -0.83444 | -0.77063 | -0.69739 | -0.56618 | -0.42792 | -0.42792 |
| 5nM+NA  | -0.55979 | -0.55979 | -0.55167 | -0.44753 | -0.31079 | -0.23138 | -0.23138 |
| +NA     | 0.258324 | 0.258324 | 0.368951 | 0.736048 | 1.092051 | 1.19775  | 1.19775  |

### Oneway Anova

#### Summary of Fit

|                            |          |
|----------------------------|----------|
| Rsquare                    | 0.934822 |
| Adj Rsquare                | 0.923959 |
| Root Mean Square Error     | 0.207214 |
| Mean of Response           | -5.56e-9 |
| Observations (or Sum Wgts) | 36       |

#### Analysis of Variance

| Source   | DF | Sum of Squares | Mean Square | F Ratio | Prob > F |
|----------|----|----------------|-------------|---------|----------|
| Label    | 5  | 18.475181      | 3.69504     | 86.0555 | <.0001 * |
| Error    | 30 | 1.288134       | 0.04294     |         |          |
| C. Total | 35 | 19.763315      |             |         |          |

#### Means for Oneway Anova

| Level   | Number | Mean    | Std Error | Lower 95% | Upper 95% |
|---------|--------|---------|-----------|-----------|-----------|
| 50nM-NA | 6      | -0.4778 | 0.08459   | -0.651    | -0.305    |
| 5nM-NA  | 6      | -0.3921 | 0.08459   | -0.565    | -0.219    |
| -NA     | 6      | 1.2366  | 0.08459   | 1.064     | 1.409     |
| 50nM+NA | 6      | -0.6698 | 0.08459   | -0.843    | -0.497    |
| 5nM+NA  | 6      | -0.4287 | 0.08459   | -0.602    | -0.256    |
| +NA     | 6      | 0.7318  | 0.08459   | 0.559     | 0.905     |

Std Error uses a pooled estimate of error variance

### Means Comparisons

#### Comparisons with a control using Dunnett's Method

### Oneway Analysis of Kynurenine By Label

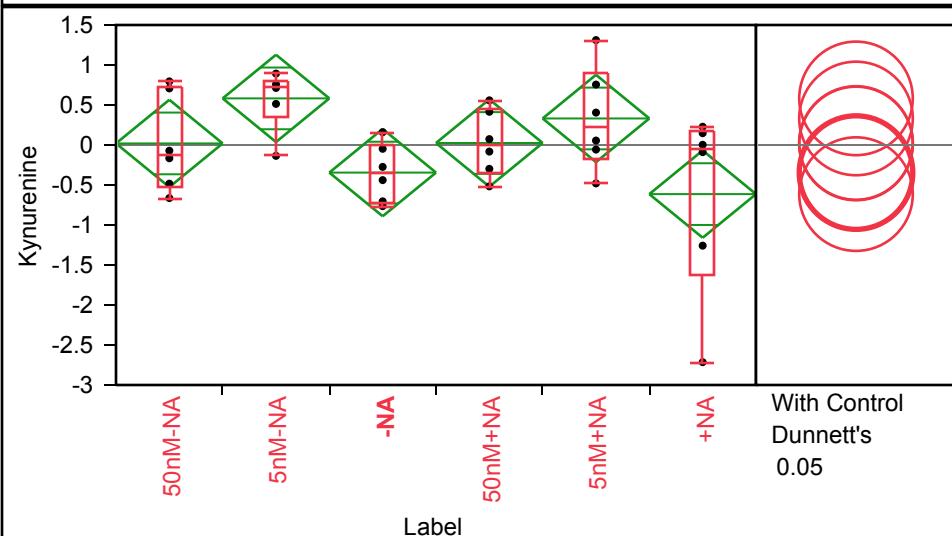

### Quantiles

| Level   | Minimum  | 10%      | 25%      | Median   | 75%      | 90%      | Maximum  |
|---------|----------|----------|----------|----------|----------|----------|----------|
| 50nM-NA | -0.66348 | -0.66348 | -0.52865 | -0.11869 | 0.729267 | 0.794855 | 0.794855 |
| 5nM-NA  | -0.13547 | -0.13547 | 0.351598 | 0.733668 | 0.791098 | 0.892751 | 0.892751 |
| -NA     | -0.76462 | -0.76462 | -0.71928 | -0.35639 | 0.004359 | 0.159724 | 0.159724 |
| 50nM+NA | -0.51677 | -0.51677 | -0.35272 | -0.00437 | 0.450968 | 0.558133 | 0.558133 |
| 5nM+NA  | -0.48012 | -0.48012 | -0.1628  | 0.230267 | 0.894295 | 1.311209 | 1.311209 |
| +NA     | -2.71471 | -2.71471 | -1.62237 | -0.04313 | 0.167627 | 0.227676 | 0.227676 |

### Oneway Anova

#### Summary of Fit

|                            |          |
|----------------------------|----------|
| Rsquare                    | 0.306567 |
| Adj Rsquare                | 0.190994 |
| Root Mean Square Error     | 0.654319 |
| Mean of Response           | -2.8e-11 |
| Observations (or Sum Wgts) | 36       |

#### Analysis of Variance

| Source   | DF | Sum of Squares | Mean Square | F Ratio | Prob > F |
|----------|----|----------------|-------------|---------|----------|
| Label    | 5  | 5.678322       | 1.13566     | 2.6526  | 0.0422 * |
| Error    | 30 | 12.843994      | 0.42813     |         |          |
| C. Total | 35 | 18.522316      |             |         |          |

#### Means for Oneway Anova

| Level   | Number | Mean     | Std Error | Lower 95% | Upper 95% |
|---------|--------|----------|-----------|-----------|-----------|
| 50nM-NA | 6      | 0.01961  | 0.26712   | -0.526    | 0.565     |
| 5nM-NA  | 6      | 0.58263  | 0.26712   | 0.037     | 1.128     |
| -NA     | 6      | -0.34488 | 0.26712   | -0.890    | 0.201     |
| 50nM+NA | 6      | 0.02497  | 0.26712   | -0.521    | 0.571     |
| 5nM+NA  | 6      | 0.33165  | 0.26712   | -0.214    | 0.877     |
| +NA     | 6      | -0.61399 | 0.26712   | -1.160    | -0.068    |

Std Error uses a pooled estimate of error variance

### Means Comparisons

#### Comparisons with a control using Dunnett's Method

### Oneway Analysis of Lactic acid By Label

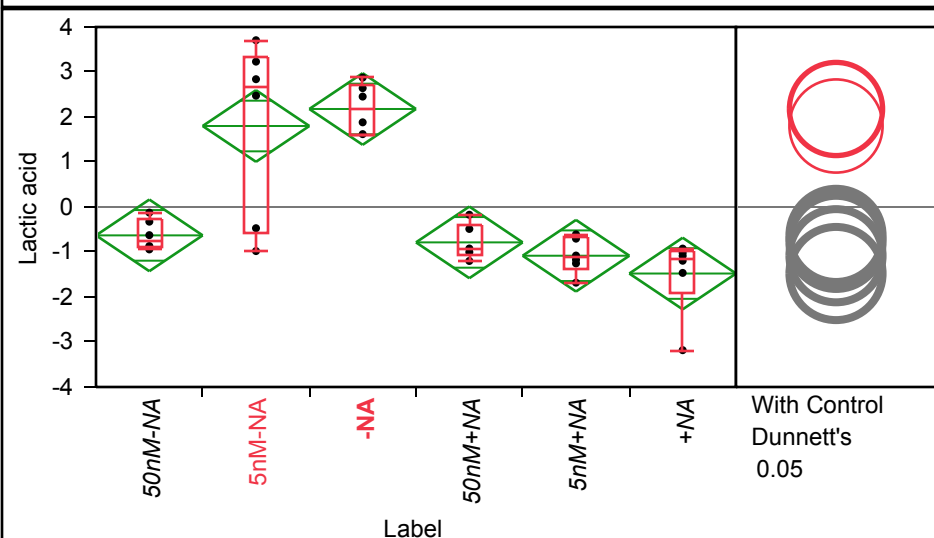

### Quantiles

| Level   | Minimum  | 10%      | 25%      | Median   | 75%      | 90%      | Maximum  |
|---------|----------|----------|----------|----------|----------|----------|----------|
| 50nM-NA | -0.94238 | -0.94238 | -0.90881 | -0.74627 | -0.27559 | -0.12474 | -0.12474 |
| 5nM-NA  | -0.97952 | -0.97952 | -0.59848 | 2.65681  | 3.349276 | 3.70579  | 3.70579  |
| -NA     | 1.597497 | 1.597497 | 1.613839 | 2.16759  | 2.699438 | 2.874866 | 2.874866 |
| 50nM+NA | -1.19934 | -1.19934 | -1.05313 | -0.92655 | -0.40875 | -0.1724  | -0.1724  |
| 5nM+NA  | -1.68133 | -1.68133 | -1.36056 | -1.12475 | -0.67986 | -0.60879 | -0.60879 |
| +NA     | -3.18171 | -3.18171 | -1.89387 | -1.14038 | -0.99483 | -0.92462 | -0.92462 |

### Oneway Anova

#### Summary of Fit

|                            |          |
|----------------------------|----------|
| Rsquare                    | 0.730681 |
| Adj Rsquare                | 0.685794 |
| Root Mean Square Error     | 0.954397 |
| Mean of Response           | 5.556e-9 |
| Observations (or Sum Wgts) | 36       |

#### Analysis of Variance

| Source   | DF | Sum of Squares | Mean Square | F Ratio | Prob > F |
|----------|----|----------------|-------------|---------|----------|
| Label    | 5  | 74.13783       | 14.8276     | 16.2784 | <.0001 * |
| Error    | 30 | 27.32624       | 0.9109      |         |          |
| C. Total | 35 | 101.46407      |             |         |          |

#### Means for Oneway Anova

| Level   | Number | Mean    | Std Error | Lower 95% | Upper 95% |
|---------|--------|---------|-----------|-----------|-----------|
| 50nM-NA | 6      | -0.6305 | 0.38963   | -1.426    | 0.165     |
| 5nM-NA  | 6      | 1.7998  | 0.38963   | 1.004     | 2.596     |
| -NA     | 6      | 2.1780  | 0.38963   | 1.382     | 2.974     |
| 50nM+NA | 6      | -0.7861 | 0.38963   | -1.582    | 0.0096    |
| 5nM+NA  | 6      | -1.0828 | 0.38963   | -1.879    | -0.287    |
| +NA     | 6      | -1.4783 | 0.38963   | -2.274    | -0.683    |

Std Error uses a pooled estimate of error variance

### Means Comparisons

#### Comparisons with a control using Dunnett's Method

### Oneway Analysis of leucine By Label

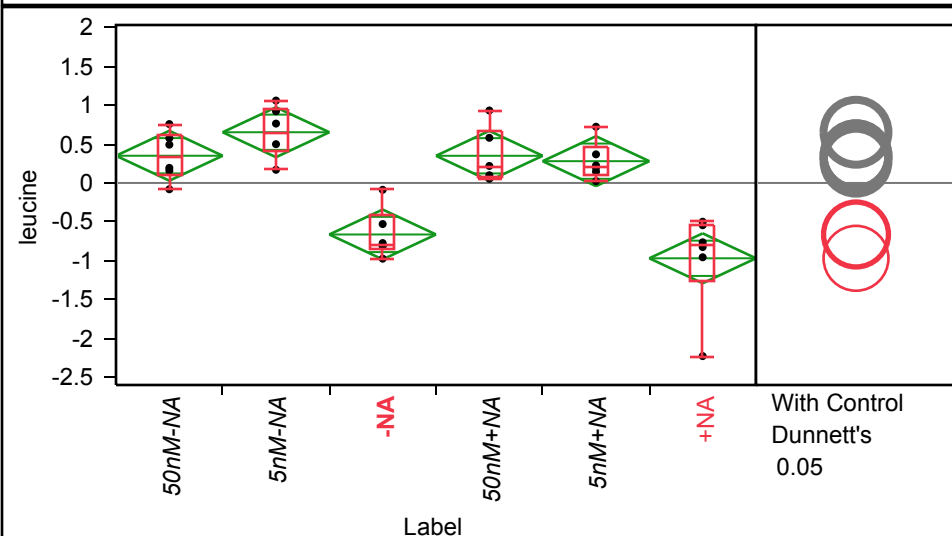

### Quantiles

| Level   | Minimum  | 10%      | 25%      | Median   | 75%      | 90%      | Maximum  |
|---------|----------|----------|----------|----------|----------|----------|----------|
| 50nM-NA | -0.08093 | -0.08093 | 0.099766 | 0.343746 | 0.622299 | 0.75803  | 0.75803  |
| 5nM-NA  | 0.169542 | 0.169542 | 0.416817 | 0.631775 | 0.95772  | 1.060596 | 1.060596 |
| -NA     | -0.97438 | -0.97438 | -0.8544  | -0.78701 | -0.41874 | -0.08815 | -0.08815 |
| 50nM+NA | 0.053712 | 0.053712 | 0.087902 | 0.215498 | 0.669281 | 0.932744 | 0.932744 |
| 5nM+NA  | 0.0235   | 0.0235   | 0.115132 | 0.210656 | 0.457085 | 0.723368 | 0.723368 |
| +NA     | -2.22873 | -2.22873 | -1.27482 | -0.79487 | -0.53282 | -0.49913 | -0.49913 |

### Oneway Anova

#### Summary of Fit

|                            |          |
|----------------------------|----------|
| Rsquare                    | 0.741919 |
| Adj Rsquare                | 0.698905 |
| Root Mean Square Error     | 0.384954 |
| Mean of Response           | 8.33e-10 |
| Observations (or Sum Wgts) | 36       |

#### Analysis of Variance

| Source   | DF | Sum of Squares | Mean Square | F Ratio | Prob > F |
|----------|----|----------------|-------------|---------|----------|
| Label    | 5  | 12.780239      | 2.55605     | 17.2485 | <.0001 * |
| Error    | 30 | 4.445690       | 0.14819     |         |          |
| C. Total | 35 | 17.225929      |             |         |          |

#### Means for Oneway Anova

| Level   | Number | Mean     | Std Error | Lower 95% | Upper 95% |
|---------|--------|----------|-----------|-----------|-----------|
| 50nM-NA | 6      | 0.35027  | 0.15716   | 0.029     | 0.6712    |
| 5nM-NA  | 6      | 0.65273  | 0.15716   | 0.332     | 0.9737    |
| -NA     | 6      | -0.66332 | 0.15716   | -0.984    | -0.3424   |
| 50nM+NA | 6      | 0.34970  | 0.15716   | 0.029     | 0.6707    |
| 5nM+NA  | 6      | 0.28036  | 0.15716   | -0.041    | 0.6013    |
| +NA     | 6      | -0.96975 | 0.15716   | -1.291    | -0.6488   |

Std Error uses a pooled estimate of error variance

### Means Comparisons

#### Comparisons with a control using Dunnett's Method

### Oneway Analysis of lysine By Label

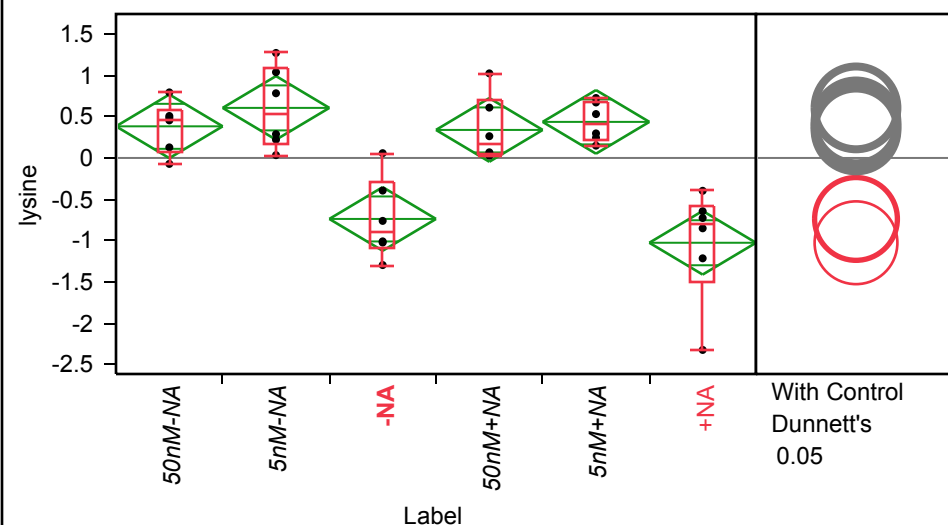

### Quantiles

| Level   | Minimum  | 10%      | 25%      | Median   | 75%      | 90%      | Maximum  |
|---------|----------|----------|----------|----------|----------|----------|----------|
| 50nM-NA | -0.07187 | -0.07187 | 0.078038 | 0.470336 | 0.579936 | 0.794278 | 0.794278 |
| 5nM-NA  | 0.033944 | 0.033944 | 0.174815 | 0.536157 | 1.097618 | 1.272508 | 1.272508 |
| -NA     | -1.29786 | -1.29786 | -1.09323 | -0.88679 | -0.28198 | 0.057806 | 0.057806 |
| 50nM+NA | 0.027511 | 0.027511 | 0.039236 | 0.166039 | 0.713873 | 1.024971 | 1.024971 |
| 5nM+NA  | 0.149263 | 0.149263 | 0.220725 | 0.414745 | 0.685891 | 0.726219 | 0.726219 |
| +NA     | -2.32634 | -2.32634 | -1.4937  | -0.78982 | -0.5834  | -0.39808 | -0.39808 |

### Oneway Anova

#### Summary of Fit

|                            |          |
|----------------------------|----------|
| Rsquare                    | 0.693886 |
| Adj Rsquare                | 0.642867 |
| Root Mean Square Error     | 0.46239  |
| Mean of Response           | 2.78e-10 |
| Observations (or Sum Wgts) | 36       |

#### Analysis of Variance

| Source   | DF | Sum of Squares | Mean Square | F Ratio | Prob > F |
|----------|----|----------------|-------------|---------|----------|
| Label    | 5  | 14.539286      | 2.90786     | 13.6005 | <.0001 * |
| Error    | 30 | 6.414142       | 0.21380     |         |          |
| C. Total | 35 | 20.953428      |             |         |          |

#### Means for Oneway Anova

| Level   | Number | Mean    | Std Error | Lower 95% | Upper 95% |
|---------|--------|---------|-----------|-----------|-----------|
| 50nM-NA | 6      | 0.3833  | 0.18877   | -0.0023   | 0.7688    |
| 5nM-NA  | 6      | 0.6066  | 0.18877   | 0.221     | 0.9922    |
| -NA     | 6      | -0.7390 | 0.18877   | -1.125    | -0.3535   |
| 50nM+NA | 6      | 0.3396  | 0.18877   | -0.046    | 0.7252    |
| 5nM+NA  | 6      | 0.4370  | 0.18877   | 0.051     | 0.8225    |
| +NA     | 6      | -1.0276 | 0.18877   | -1.413    | -0.6420   |

Std Error uses a pooled estimate of error variance

### Means Comparisons

#### Comparisons with a control using Dunnett's Method

### Oneway Analysis of LysoPC(20:4) By Label

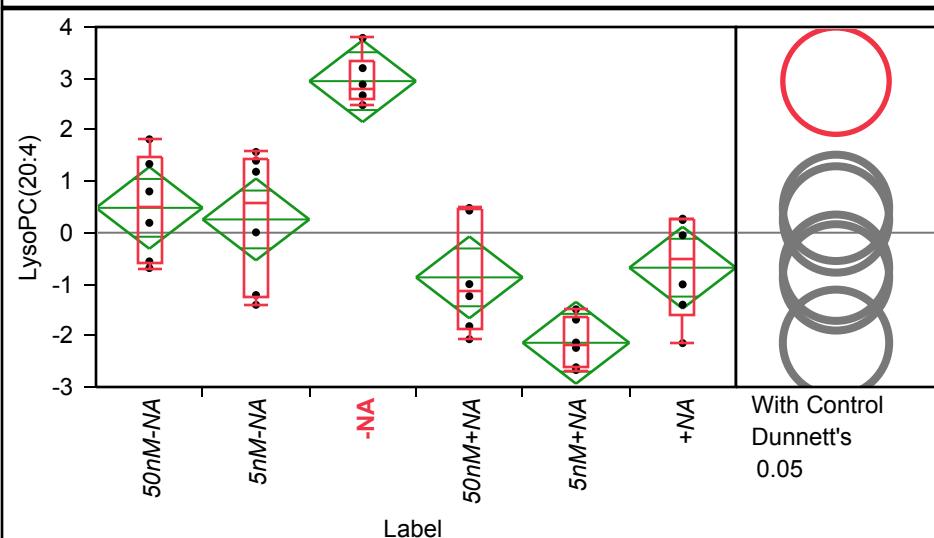

### Quantiles

| Level   | Minimum  | 10%      | 25%      | Median   | 75%      | 90%      | Maximum  |
|---------|----------|----------|----------|----------|----------|----------|----------|
| 50nM-NA | -0.68757 | -0.68757 | -0.59036 | 0.497069 | 1.456597 | 1.816381 | 1.816381 |
| 5nM-NA  | -1.40219 | -1.40219 | -1.26004 | 0.596048 | 1.442515 | 1.570914 | 1.570914 |
| -NA     | 2.481484 | 2.481484 | 2.615831 | 2.776543 | 3.347178 | 3.787462 | 3.787462 |
| 50nM+NA | -2.07107 | -2.07107 | -1.88071 | -1.1166  | 0.442889 | 0.480621 | 0.480621 |
| 5nM+NA  | -2.67018 | -2.67018 | -2.62995 | -2.18703 | -1.63978 | -1.48993 | -1.48993 |
| +NA     | -2.14682 | -2.14682 | -1.58668 | -0.52754 | 0.253664 | 0.273091 | 0.273091 |

### Oneway Anova

#### Summary of Fit

|                            |          |
|----------------------------|----------|
| Rsquare                    | 0.764959 |
| Adj Rsquare                | 0.725785 |
| Root Mean Square Error     | 0.953128 |
| Mean of Response           | 5.56e-11 |
| Observations (or Sum Wgts) | 36       |

#### Analysis of Variance

| Source   | DF | Sum of Squares | Mean Square | F Ratio | Prob > F |
|----------|----|----------------|-------------|---------|----------|
| Label    | 5  | 88.69876       | 17.7398     | 19.5274 | <.0001 * |
| Error    | 30 | 27.25357       | 0.9085      |         |          |
| C. Total | 35 | 115.95233      |             |         |          |

#### Means for Oneway Anova

| Level   | Number | Mean    | Std Error | Lower 95% | Upper 95% |
|---------|--------|---------|-----------|-----------|-----------|
| 50nM-NA | 6      | 0.4836  | 0.38911   | -0.311    | 1.278     |
| 5nM-NA  | 6      | 0.2580  | 0.38911   | -0.537    | 1.053     |
| -NA     | 6      | 2.9472  | 0.38911   | 2.153     | 3.742     |
| 50nM+NA | 6      | -0.8684 | 0.38911   | -1.663    | -0.074    |
| 5nM+NA  | 6      | -2.1401 | 0.38911   | -2.935    | -1.345    |
| +NA     | 6      | -0.6803 | 0.38911   | -1.475    | 0.114     |

Std Error uses a pooled estimate of error variance

### Means Comparisons

#### Comparisons with a control using Dunnett's Method

### Oneway Analysis of Maleic acid By Label

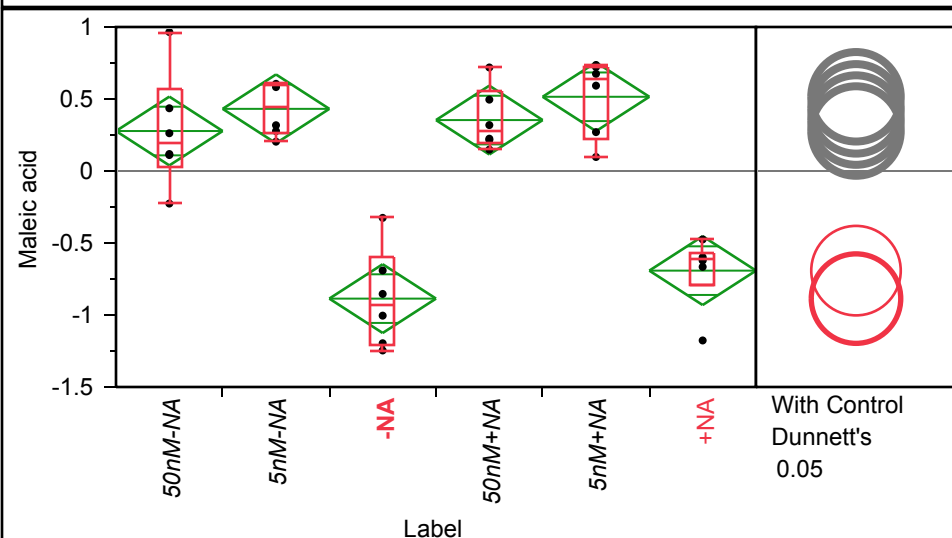

### Quantiles

| Level   | Minimum  | 10%      | 25%      | Median   | 75%      | 90%      | Maximum  |
|---------|----------|----------|----------|----------|----------|----------|----------|
| 50nM-NA | -0.22611 | -0.22611 | 0.026592 | 0.190076 | 0.567952 | 0.964944 | 0.964944 |
| 5nM-NA  | 0.203693 | 0.203693 | 0.258875 | 0.450246 | 0.60323  | 0.605204 | 0.605204 |
| -NA     | -1.2462  | -1.2462  | -1.20877 | -0.92917 | -0.59964 | -0.32553 | -0.32553 |
| 50nM+NA | 0.148406 | 0.148406 | 0.199026 | 0.271596 | 0.55138  | 0.718834 | 0.718834 |
| 5nM+NA  | 0.0972   | 0.0972   | 0.226793 | 0.633571 | 0.72539  | 0.736205 | 0.736205 |
| +NA     | -1.17682 | -1.17682 | -0.79355 | -0.61764 | -0.5676  | -0.47519 | -0.47519 |

### Oneway Anova

#### Summary of Fit

|                            |          |
|----------------------------|----------|
| Rsquare                    | 0.823787 |
| Adj Rsquare                | 0.794418 |
| Root Mean Square Error     | 0.28646  |
| Mean of Response           | -2.5e-17 |
| Observations (or Sum Wgts) | 36       |

#### Analysis of Variance

| Source   | DF | Sum of Squares | Mean Square | F Ratio | Prob > F |
|----------|----|----------------|-------------|---------|----------|
| Label    | 5  | 11.508686      | 2.30174     | 28.0497 | <.0001 * |
| Error    | 30 | 2.461781       | 0.08206     |         |          |
| C. Total | 35 | 13.970467      |             |         |          |

#### Means for Oneway Anova

| Level   | Number | Mean     | Std Error | Lower 95% | Upper 95% |
|---------|--------|----------|-----------|-----------|-----------|
| 50nM-NA | 6      | 0.27757  | 0.11695   | 0.039     | 0.5164    |
| 5nM-NA  | 6      | 0.43154  | 0.11695   | 0.193     | 0.6704    |
| -NA     | 6      | -0.88623 | 0.11695   | -1.125    | -0.6474   |
| 50nM+NA | 6      | 0.35365  | 0.11695   | 0.115     | 0.5925    |
| 5nM+NA  | 6      | 0.51539  | 0.11695   | 0.277     | 0.7542    |
| +NA     | 6      | -0.69192 | 0.11695   | -0.931    | -0.4531   |

Std Error uses a pooled estimate of error variance

### Means Comparisons

#### Comparisons with a control using Dunnett's Method

### Oneway Analysis of Malic acid By Label

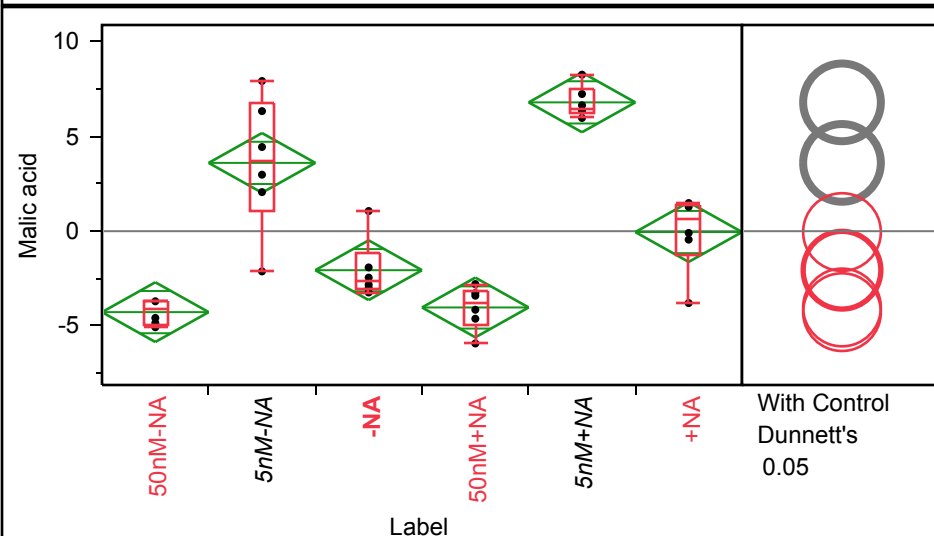

### Quantiles

| Level   | Minimum  | 10%      | 25%      | Median   | 75%      | 90%      | Maximum  |
|---------|----------|----------|----------|----------|----------|----------|----------|
| 50nM-NA | -5.06722 | -5.06722 | -4.89809 | -4.14658 | -3.71156 | -3.69727 | -3.69727 |
| 5nM-NA  | -2.12111 | -2.12111 | 1.016244 | 3.709513 | 6.729322 | 7.919709 | 7.919709 |
| -NA     | -3.23211 | -3.23211 | -3.05362 | -2.63486 | -1.16868 | 1.062083 | 1.062083 |
| 50nM+NA | -5.92247 | -5.92247 | -4.94361 | -3.77361 | -3.14453 | -2.78929 | -2.78929 |
| 5nM+NA  | 5.971429 | 5.971429 | 6.236444 | 6.489706 | 7.489553 | 8.256018 | 8.256018 |
| +NA     | -3.79074 | -3.79074 | -1.28163 | 0.595585 | 1.334503 | 1.483029 | 1.483029 |

### Oneway Anova

#### Summary of Fit

|                            |          |
|----------------------------|----------|
| Rsquare                    | 0.845715 |
| Adj Rsquare                | 0.820001 |
| Root Mean Square Error     | 1.888874 |
| Mean of Response           | 2.78e-10 |
| Observations (or Sum Wgts) | 36       |

#### Analysis of Variance

| Source   | DF | Sum of Squares | Mean Square | F Ratio | Prob > F |
|----------|----|----------------|-------------|---------|----------|
| Label    | 5  | 586.71671      | 117.343     | 32.8891 | <.0001 * |
| Error    | 30 | 107.03537      | 3.568       |         |          |
| C. Total | 35 | 693.75208      |             |         |          |

#### Means for Oneway Anova

| Level   | Number | Mean    | Std Error | Lower 95% | Upper 95% |
|---------|--------|---------|-----------|-----------|-----------|
| 50nM-NA | 6      | -4.2693 | 0.77113   | -5.844    | -2.694    |
| 5nM-NA  | 6      | 3.6020  | 0.77113   | 2.027     | 5.177     |
| -NA     | 6      | -2.0577 | 0.77113   | -3.633    | -0.483    |
| 50nM+NA | 6      | -4.0232 | 0.77113   | -5.598    | -2.448    |
| 5nM+NA  | 6      | 6.7943  | 0.77113   | 5.219     | 8.369     |
| +NA     | 6      | -0.0461 | 0.77113   | -1.621    | 1.529     |

Std Error uses a pooled estimate of error variance

### Means Comparisons

#### Comparisons with a control using Dunnett's Method

### Oneway Analysis of Mannose By Label

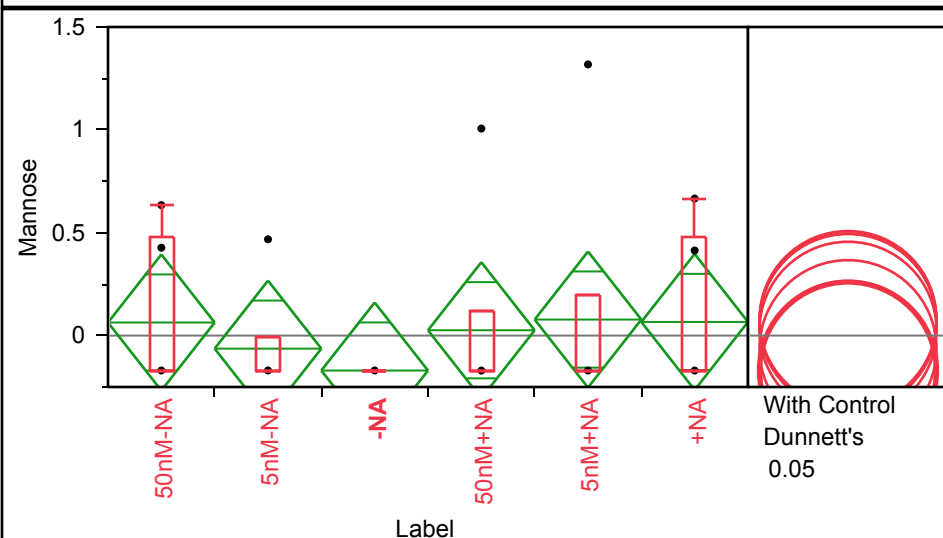

### Quantiles

| Level   | Minimum  | 10%      | 25%      | Median   | 75%      | 90%      | Maximum  |
|---------|----------|----------|----------|----------|----------|----------|----------|
| 50nM-NA | -0.17041 | -0.17041 | -0.17026 | -0.1699  | 0.478864 | 0.634123 | 0.634123 |
| 5nM-NA  | -0.17003 | -0.17003 | -0.16993 | -0.16979 | -0.0102  | 0.468043 | 0.468043 |
| -NA     | -0.17013 | -0.17013 | -0.17003 | -0.16991 | -0.1698  | -0.16963 | -0.16963 |
| 50nM+NA | -0.17039 | -0.17039 | -0.17031 | -0.17019 | 0.123957 | 1.006217 | 1.006217 |
| 5nM+NA  | -0.17051 | -0.17051 | -0.17037 | -0.17011 | 0.202082 | 1.317954 | 1.317954 |
| +NA     | -0.17192 | -0.17192 | -0.17054 | -0.17004 | 0.47675  | 0.666096 | 0.666096 |

### Oneway Anova

#### Summary of Fit

|                            |          |
|----------------------------|----------|
| Rsquare                    | 0.057579 |
| Adj Rsquare                | -0.09949 |
| Root Mean Square Error     | 0.3966   |
| Mean of Response           | 2.778e-9 |
| Observations (or Sum Wgts) | 36       |

#### Analysis of Variance

| Source   | DF | Sum of Squares | Mean Square | F Ratio | Prob > F |
|----------|----|----------------|-------------|---------|----------|
| Label    | 5  | 0.2882985      | 0.057660    | 0.3666  | 0.8674   |
| Error    | 30 | 4.7187391      | 0.157291    |         |          |
| C. Total | 35 | 5.0070376      |             |         |          |

#### Means for Oneway Anova

| Level   | Number | Mean     | Std Error | Lower 95% | Upper 95% |
|---------|--------|----------|-----------|-----------|-----------|
| 50nM-NA | 6      | 0.06347  | 0.16191   | -0.2672   | 0.39414   |
| 5nM-NA  | 6      | -0.06351 | 0.16191   | -0.3942   | 0.26715   |
| -NA     | 6      | -0.16991 | 0.16191   | -0.5006   | 0.16076   |
| 50nM+NA | 6      | 0.02584  | 0.16191   | -0.3048   | 0.35650   |
| 5nM+NA  | 6      | 0.07784  | 0.16191   | -0.2528   | 0.40851   |
| +NA     | 6      | 0.06628  | 0.16191   | -0.2644   | 0.39694   |

Std Error uses a pooled estimate of error variance

### Means Comparisons

#### Comparisons with a control using Dunnett's Method

### Oneway Analysis of methionine By Label

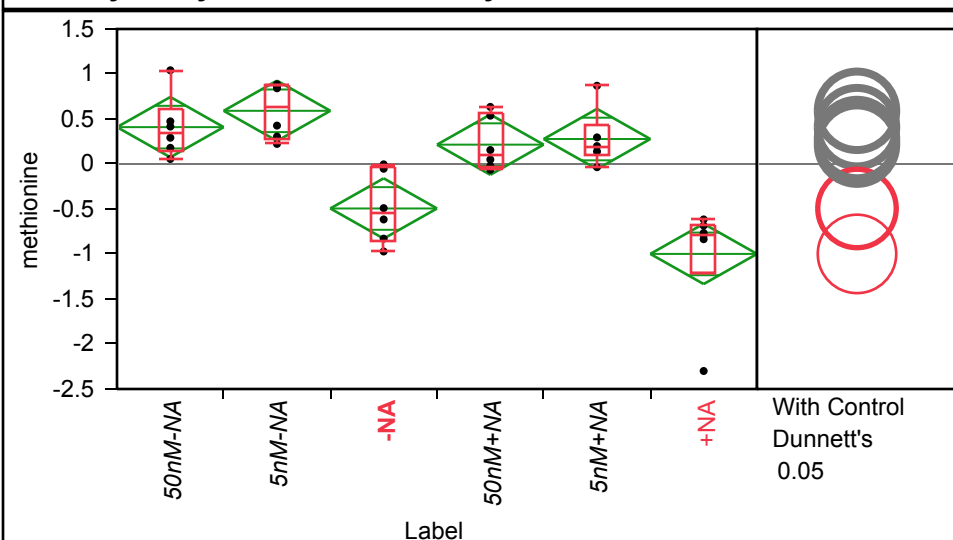

### Quantiles

| Level   | Minimum  | 10%      | 25%      | Median   | 75%      | 90%      | Maximum  |
|---------|----------|----------|----------|----------|----------|----------|----------|
| 50nM-NA | 0.055737 | 0.055737 | 0.14861  | 0.353738 | 0.615322 | 1.041237 | 1.041237 |
| 5nM-NA  | 0.223117 | 0.223117 | 0.284309 | 0.633722 | 0.87051  | 0.885188 | 0.885188 |
| -NA     | -0.97198 | -0.97198 | -0.86514 | -0.55337 | -0.04063 | -0.00402 | -0.00402 |
| 50nM+NA | -0.06443 | -0.06443 | -0.03228 | 0.102113 | 0.56145  | 0.634411 | 0.634411 |
| 5nM+NA  | -0.03542 | -0.03542 | 0.095448 | 0.198481 | 0.439079 | 0.869414 | 0.869414 |
| +NA     | -2.30008 | -2.30008 | -1.20174 | -0.77879 | -0.66739 | -0.61597 | -0.61597 |

### Oneway Anova

#### Summary of Fit

|                            |          |
|----------------------------|----------|
| Rsquare                    | 0.699934 |
| Adj Rsquare                | 0.649923 |
| Root Mean Square Error     | 0.401752 |
| Mean of Response           | 5.56e-11 |
| Observations (or Sum Wgts) | 36       |

#### Analysis of Variance

| Source   | DF | Sum of Squares | Mean Square | F Ratio | Prob > F |
|----------|----|----------------|-------------|---------|----------|
| Label    | 5  | 11.294746      | 2.25895     | 13.9956 | <.0001 * |
| Error    | 30 | 4.842135       | 0.16140     |         |          |
| C. Total | 35 | 16.136881      |             |         |          |

#### Means for Oneway Anova

| Level   | Number | Mean     | Std Error | Lower 95% | Upper 95% |
|---------|--------|----------|-----------|-----------|-----------|
| 50nM-NA | 6      | 0.40956  | 0.16401   | 0.075     | 0.7445    |
| 5nM-NA  | 6      | 0.59101  | 0.16401   | 0.256     | 0.9260    |
| -NA     | 6      | -0.49418 | 0.16401   | -0.829    | -0.1592   |
| 50nM+NA | 6      | 0.21496  | 0.16401   | -0.120    | 0.5499    |
| 5nM+NA  | 6      | 0.27761  | 0.16401   | -0.057    | 0.6126    |
| +NA     | 6      | -0.99896 | 0.16401   | -1.334    | -0.6640   |

Std Error uses a pooled estimate of error variance

### Means Comparisons

#### Comparisons with a control using Dunnett's Method

### Oneway Analysis of Methionine sulfoxide By Label

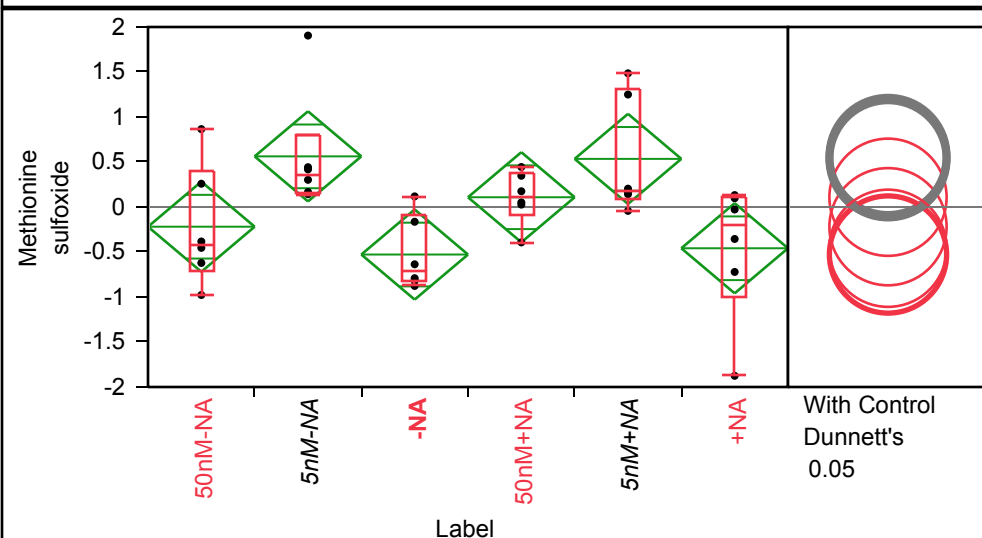

### Quantiles

| Level   | Minimum  | 10%      | 25%      | Median   | 75%      | 90%      | Maximum  |
|---------|----------|----------|----------|----------|----------|----------|----------|
| 50nM-NA | -0.97783 | -0.97783 | -0.71068 | -0.41877 | 0.410022 | 0.865178 | 0.865178 |
| 5nM-NA  | 0.142539 | 0.142539 | 0.160503 | 0.359625 | 0.80791  | 1.904708 | 1.904708 |
| -NA     | -0.87712 | -0.87712 | -0.83225 | -0.71403 | -0.09353 | 0.117917 | 0.117917 |
| 50nM+NA | -0.39329 | -0.39329 | -0.07846 | 0.113    | 0.371247 | 0.444102 | 0.444102 |
| 5nM+NA  | -0.04287 | -0.04287 | 0.096199 | 0.186472 | 1.308613 | 1.485223 | 1.485223 |
| +NA     | -1.87567 | -1.87567 | -1.01012 | -0.19157 | 0.105969 | 0.132121 | 0.132121 |

### Oneway Anova

#### Summary of Fit

|                            |          |
|----------------------------|----------|
| Rsquare                    | 0.389818 |
| Adj Rsquare                | 0.28812  |
| Root Mean Square Error     | 0.600289 |
| Mean of Response           | 8.33e-10 |
| Observations (or Sum Wgts) | 36       |

#### Analysis of Variance

| Source   | DF | Sum of Squares | Mean Square | F Ratio | Prob > F |
|----------|----|----------------|-------------|---------|----------|
| Label    | 5  | 6.906267       | 1.38125     | 3.8331  | 0.0084 * |
| Error    | 30 | 10.810398      | 0.36035     |         |          |
| C. Total | 35 | 17.716665      |             |         |          |

#### Means for Oneway Anova

| Level   | Number | Mean     | Std Error | Lower 95% | Upper 95% |
|---------|--------|----------|-----------|-----------|-----------|
| 50nM-NA | 6      | -0.21892 | 0.24507   | -0.719    | 0.282     |
| 5nM-NA  | 6      | 0.56255  | 0.24507   | 0.062     | 1.063     |
| -NA     | 6      | -0.52810 | 0.24507   | -1.029    | -0.028    |
| 50nM+NA | 6      | 0.10837  | 0.24507   | -0.392    | 0.609     |
| 5nM+NA  | 6      | 0.53460  | 0.24507   | 0.034     | 1.035     |
| +NA     | 6      | -0.45851 | 0.24507   | -0.959    | 0.042     |

Std Error uses a pooled estimate of error variance

### Means Comparisons

#### Comparisons with a control using Dunnett's Method

### Oneway Analysis of Methylcysteine By Label

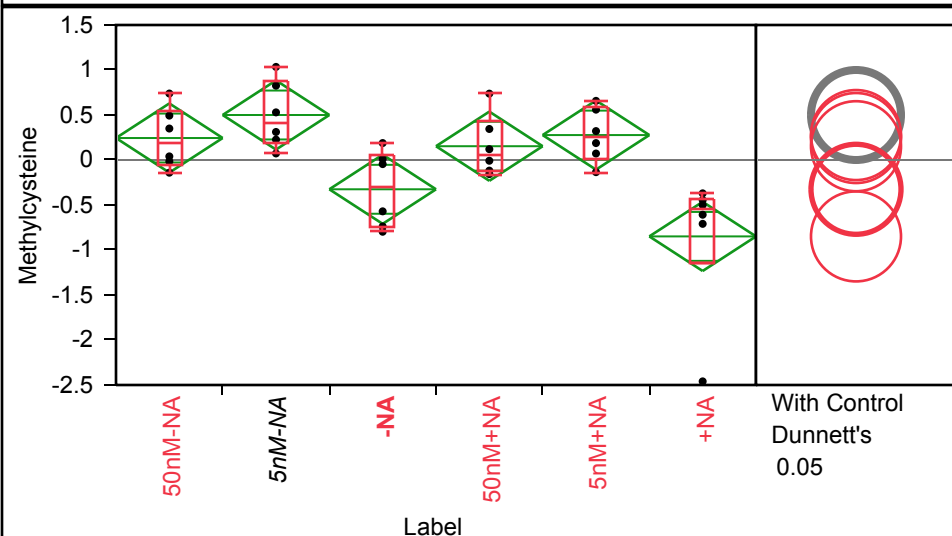

### Quantiles

| Level   | Minimum  | 10%      | 25%      | Median   | 75%      | 90%      | Maximum  |
|---------|----------|----------|----------|----------|----------|----------|----------|
| 50nM-NA | -0.14084 | -0.14084 | -0.04686 | 0.19482  | 0.554505 | 0.73839  | 0.73839  |
| 5nM-NA  | 0.072946 | 0.072946 | 0.187991 | 0.420278 | 0.877954 | 1.034341 | 1.034341 |
| -NA     | -0.79718 | -0.79718 | -0.75333 | -0.30801 | 0.05539  | 0.188193 | 0.188193 |
| 50nM+NA | -0.15676 | -0.15676 | -0.12791 | 0.055993 | 0.442851 | 0.73727  | 0.73727  |
| 5nM+NA  | -0.13498 | -0.13498 | 0.020095 | 0.254518 | 0.583903 | 0.657002 | 0.657002 |
| +NA     | -2.45986 | -2.45986 | -1.14701 | -0.55439 | -0.42633 | -0.37065 | -0.37065 |

### Oneway Anova

#### Summary of Fit

|                            |          |
|----------------------------|----------|
| Rsquare                    | 0.537806 |
| Adj Rsquare                | 0.460773 |
| Root Mean Square Error     | 0.460995 |
| Mean of Response           | -8.3e-11 |
| Observations (or Sum Wgts) | 36       |

#### Analysis of Variance

| Source   | DF | Sum of Squares | Mean Square | F Ratio | Prob > F |
|----------|----|----------------|-------------|---------|----------|
| Label    | 5  | 7.418486       | 1.48370     | 6.9816  | 0.0002 * |
| Error    | 30 | 6.375503       | 0.21252     |         |          |
| C. Total | 35 | 13.793989      |             |         |          |

#### Means for Oneway Anova

| Level   | Number | Mean     | Std Error | Lower 95% | Upper 95% |
|---------|--------|----------|-----------|-----------|-----------|
| 50nM-NA | 6      | 0.24414  | 0.18820   | -0.140    | 0.6285    |
| 5nM-NA  | 6      | 0.50000  | 0.18820   | 0.116     | 0.8844    |
| -NA     | 6      | -0.32543 | 0.18820   | -0.710    | 0.0589    |
| 50nM+NA | 6      | 0.15315  | 0.18820   | -0.231    | 0.5375    |
| 5nM+NA  | 6      | 0.27706  | 0.18820   | -0.107    | 0.6614    |
| +NA     | 6      | -0.84893 | 0.18820   | -1.233    | -0.4646   |

Std Error uses a pooled estimate of error variance

### Means Comparisons

#### Comparisons with a control using Dunnett's Method

### Oneway Analysis of Methylmalonic acid By Label

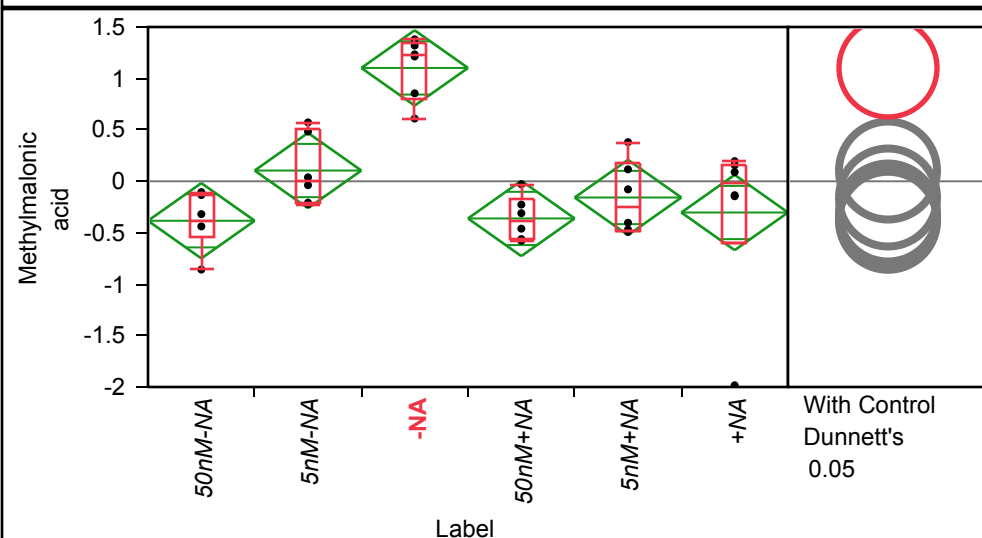

### Quantiles

| Level   | Minimum  | 10%      | 25%      | Median   | 75%      | 90%      | Maximum  |
|---------|----------|----------|----------|----------|----------|----------|----------|
| 50nM-NA | -0.85843 | -0.85843 | -0.55019 | -0.37903 | -0.12671 | -0.10529 | -0.10529 |
| 5nM-NA  | -0.2219  | -0.2219  | -0.21164 | 0.000335 | 0.506098 | 0.572424 | 0.572424 |
| -NA     | 0.609749 | 0.609749 | 0.793786 | 1.22333  | 1.334723 | 1.380203 | 1.380203 |
| 50nM+NA | -0.57936 | -0.57936 | -0.56634 | -0.38539 | -0.17706 | -0.02955 | -0.02955 |
| 5nM+NA  | -0.49151 | -0.49151 | -0.47527 | -0.24062 | 0.182129 | 0.38041  | 0.38041  |
| +NA     | -1.98319 | -1.98319 | -0.60477 | -0.02267 | 0.166626 | 0.195816 | 0.195816 |

### Oneway Anova

#### Summary of Fit

|                            |          |
|----------------------------|----------|
| Rsquare                    | 0.626877 |
| Adj Rsquare                | 0.56469  |
| Root Mean Square Error     | 0.439137 |
| Mean of Response           | -8.3e-10 |
| Observations (or Sum Wgts) | 36       |

#### Analysis of Variance

| Source   | DF | Sum of Squares | Mean Square | F Ratio | Prob > F |
|----------|----|----------------|-------------|---------|----------|
| Label    | 5  | 9.719703       | 1.94394     | 10.0805 | <.0001 * |
| Error    | 30 | 5.785246       | 0.19284     |         |          |
| C. Total | 35 | 15.504948      |             |         |          |

#### Means for Oneway Anova

| Level   | Number | Mean    | Std Error | Lower 95% | Upper 95% |
|---------|--------|---------|-----------|-----------|-----------|
| 50nM-NA | 6      | -0.3838 | 0.17928   | -0.7500   | -0.018    |
| 5nM-NA  | 6      | 0.1045  | 0.17928   | -0.2616   | 0.471     |
| -NA     | 6      | 1.1019  | 0.17928   | 0.7358    | 1.468     |
| 50nM+NA | 6      | -0.3613 | 0.17928   | -0.7275   | 0.00481   |
| 5nM+NA  | 6      | -0.1577 | 0.17928   | -0.5238   | 0.208     |
| +NA     | 6      | -0.3035 | 0.17928   | -0.6697   | 0.063     |

Std Error uses a pooled estimate of error variance

### Means Comparisons

#### Comparisons with a control using Dunnett's Method

### Oneway Analysis of myo-inositol By Label

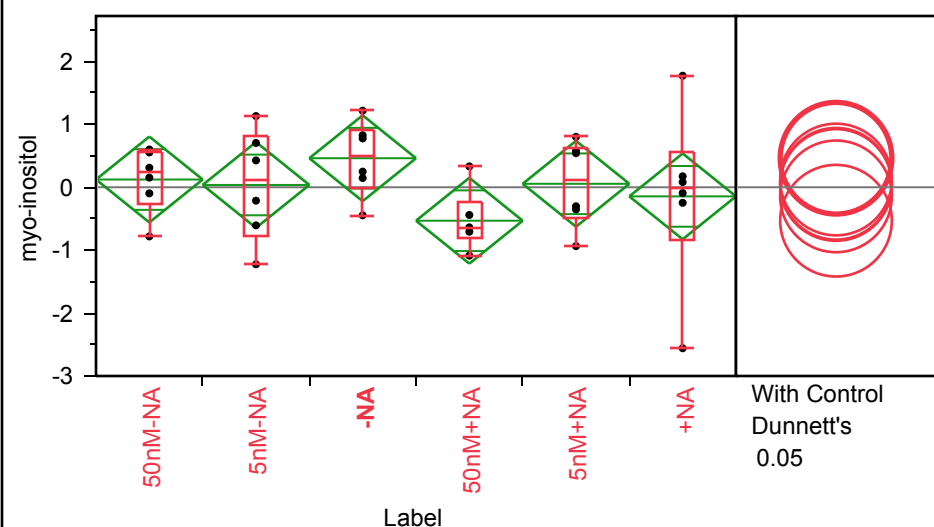

### Quantiles

| Level   | Minimum  | 10%      | 25%      | Median   | 75%      | 90%      | Maximum  |
|---------|----------|----------|----------|----------|----------|----------|----------|
| 50nM-NA | -0.7816  | -0.7816  | -0.26809 | 0.231785 | 0.56512  | 0.600507 | 0.600507 |
| 5nM-NA  | -1.2244  | -1.2244  | -0.76022 | 0.10684  | 0.811245 | 1.131279 | 1.131279 |
| -NA     | -0.44601 | -0.44601 | -0.00125 | 0.512243 | 0.924499 | 1.217106 | 1.217106 |
| 50nM+NA | -1.08706 | -1.08706 | -0.80202 | -0.64355 | -0.24748 | 0.331799 | 0.331799 |
| 5nM+NA  | -0.93537 | -0.93537 | -0.49833 | 0.119787 | 0.633867 | 0.801669 | 0.801669 |
| +NA     | -2.55885 | -2.55885 | -0.82512 | -0.00486 | 0.57355  | 1.772618 | 1.772618 |

### Oneway Anova

#### Summary of Fit

|                            |          |
|----------------------------|----------|
| Rsquare                    | 0.13811  |
| Adj Rsquare                | -0.00554 |
| Root Mean Square Error     | 0.818123 |
| Mean of Response           | -2.8e-10 |
| Observations (or Sum Wgts) | 36       |

#### Analysis of Variance

| Source   | DF | Sum of Squares | Mean Square | F Ratio | Prob > F |
|----------|----|----------------|-------------|---------|----------|
| Label    | 5  | 3.217596       | 0.643519    | 0.9614  | 0.4568   |
| Error    | 30 | 20.079748      | 0.669325    |         |          |
| C. Total | 35 | 23.297345      |             |         |          |

#### Means for Oneway Anova

| Level   | Number | Mean     | Std Error | Lower 95% | Upper 95% |
|---------|--------|----------|-----------|-----------|-----------|
| 50nM-NA | 6      | 0.12315  | 0.33400   | -0.559    | 0.8053    |
| 5nM-NA  | 6      | 0.03661  | 0.33400   | -0.646    | 0.7187    |
| -NA     | 6      | 0.46159  | 0.33400   | -0.221    | 1.1437    |
| 50nM+NA | 6      | -0.53166 | 0.33400   | -1.214    | 0.1505    |
| 5nM+NA  | 6      | 0.05519  | 0.33400   | -0.627    | 0.7373    |
| +NA     | 6      | -0.14488 | 0.33400   | -0.827    | 0.5372    |

Std Error uses a pooled estimate of error variance

### Means Comparisons

#### Comparisons with a control using Dunnett's Method

### Oneway Analysis of N6-Acetyl-L-lysine By Label

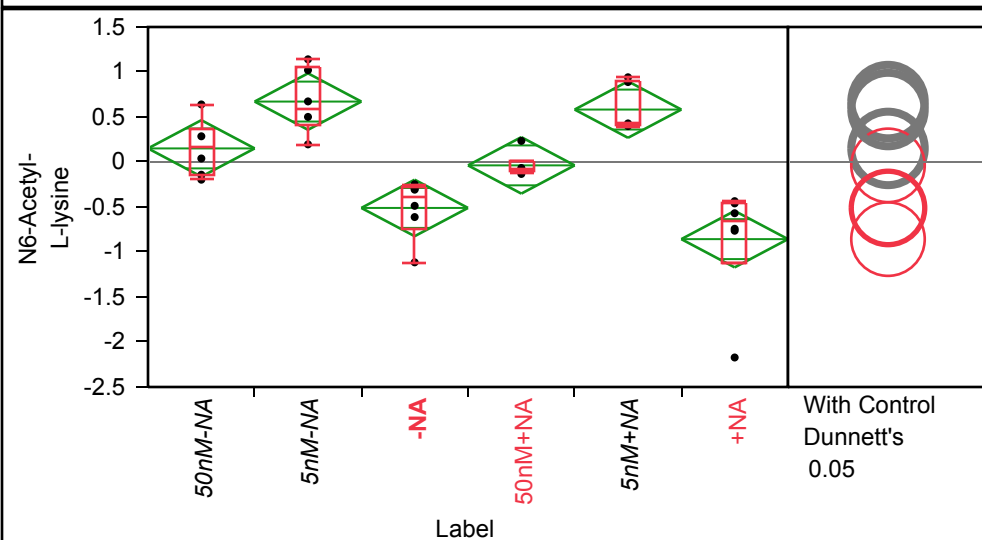

### Quantiles

| Level   | Minimum  | 10%      | 25%      | Median   | 75%      | 90%      | Maximum  |
|---------|----------|----------|----------|----------|----------|----------|----------|
| 50nM-NA | -0.1965  | -0.1965  | -0.15519 | 0.159107 | 0.374012 | 0.63945  | 0.63945  |
| 5nM-NA  | 0.195988 | 0.195988 | 0.421793 | 0.587098 | 1.0507   | 1.140843 | 1.140843 |
| -NA     | -1.11493 | -1.11493 | -0.7377  | -0.39721 | -0.28298 | -0.24675 | -0.24675 |
| 50nM+NA | -0.13275 | -0.13275 | -0.10762 | -0.08031 | 0.008725 | 0.234295 | 0.234295 |
| 5nM+NA  | 0.399221 | 0.399221 | 0.410041 | 0.42688  | 0.901507 | 0.941211 | 0.941211 |
| +NA     | -2.17219 | -2.17219 | -1.11587 | -0.65564 | -0.45364 | -0.43519 | -0.43519 |

### Oneway Anova

#### Summary of Fit

|                            |          |
|----------------------------|----------|
| Rsquare                    | 0.718822 |
| Adj Rsquare                | 0.671959 |
| Root Mean Square Error     | 0.376268 |
| Mean of Response           | 2.47e-17 |
| Observations (or Sum Wgts) | 36       |

#### Analysis of Variance

| Source   | DF | Sum of Squares | Mean Square | F Ratio | Prob > F |
|----------|----|----------------|-------------|---------|----------|
| Label    | 5  | 10.858128      | 2.17163     | 15.3388 | <.0001 * |
| Error    | 30 | 4.247319       | 0.14158     |         |          |
| C. Total | 35 | 15.105447      |             |         |          |

#### Means for Oneway Anova

| Level   | Number | Mean     | Std Error | Lower 95% | Upper 95% |
|---------|--------|----------|-----------|-----------|-----------|
| 50nM-NA | 6      | 0.15088  | 0.15361   | -0.163    | 0.4646    |
| 5nM-NA  | 6      | 0.67146  | 0.15361   | 0.358     | 0.9852    |
| -NA     | 6      | -0.51052 | 0.15361   | -0.824    | -0.1968   |
| 50nM+NA | 6      | -0.03746 | 0.15361   | -0.351    | 0.2763    |
| 5nM+NA  | 6      | 0.58269  | 0.15361   | 0.269     | 0.8964    |
| +NA     | 6      | -0.85704 | 0.15361   | -1.171    | -0.5433   |

Std Error uses a pooled estimate of error variance

### Means Comparisons

#### Comparisons with a control using Dunnett's Method

### Oneway Analysis of N-Acetylaspartylglutamic acid By Label

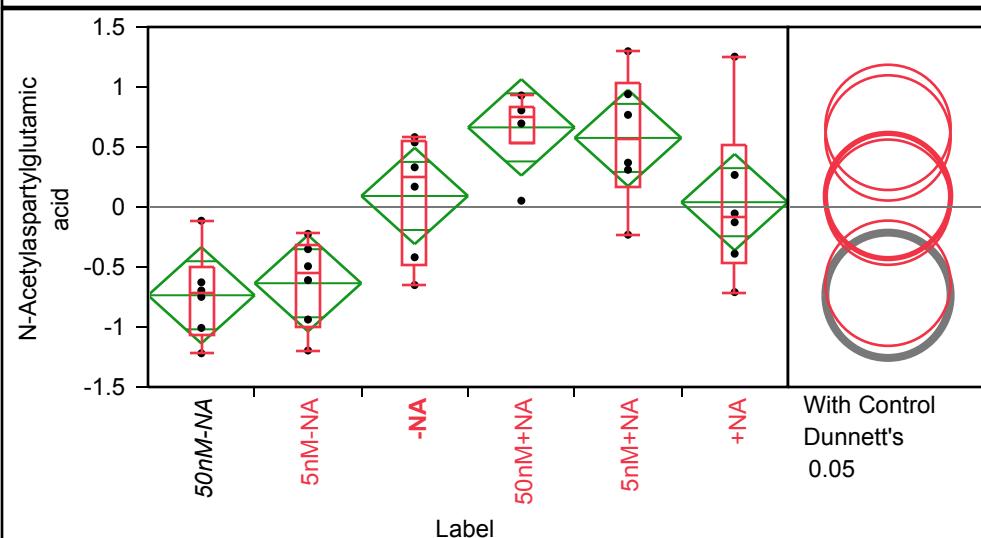

### Quantiles

| Level   | Minimum  | 10%      | 25%      | Median   | 75%      | 90%      | Maximum  |
|---------|----------|----------|----------|----------|----------|----------|----------|
| 50nM-NA | -1.219   | -1.219   | -1.06054 | -0.72239 | -0.49955 | -0.11446 | -0.11446 |
| 5nM-NA  | -1.19578 | -1.19578 | -1.00238 | -0.55151 | -0.3194  | -0.22398 | -0.22398 |
| -NA     | -0.65086 | -0.65086 | -0.47685 | 0.250233 | 0.54927  | 0.582236 | 0.582236 |
| 50nM+NA | 0.052286 | 0.052286 | 0.53484  | 0.748972 | 0.836183 | 0.929371 | 0.929371 |
| 5nM+NA  | -0.23105 | -0.23105 | 0.174717 | 0.568565 | 1.029464 | 1.297836 | 1.297836 |
| +NA     | -0.70965 | -0.70965 | -0.46933 | -0.09048 | 0.513631 | 1.25276  | 1.25276  |

### Oneway Anova

#### Summary of Fit

|                            |          |
|----------------------------|----------|
| Rsquare                    | 0.598629 |
| Adj Rsquare                | 0.531734 |
| Root Mean Square Error     | 0.481138 |
| Mean of Response           | 2.78e-10 |
| Observations (or Sum Wgts) | 36       |

#### Analysis of Variance

| Source   | DF | Sum of Squares | Mean Square | F Ratio | Prob > F |
|----------|----|----------------|-------------|---------|----------|
| Label    | 5  | 10.357924      | 2.07158     | 8.9488  | <.0001 * |
| Error    | 30 | 6.944823       | 0.23149     |         |          |
| C. Total | 35 | 17.302748      |             |         |          |

#### Means for Oneway Anova

| Level   | Number | Mean     | Std Error | Lower 95% | Upper 95% |
|---------|--------|----------|-----------|-----------|-----------|
| 50nM-NA | 6      | -0.73564 | 0.19642   | -1.137    | -0.334    |
| 5nM-NA  | 6      | -0.63532 | 0.19642   | -1.036    | -0.234    |
| -NA     | 6      | 0.09188  | 0.19642   | -0.309    | 0.493     |
| 50nM+NA | 6      | 0.66340  | 0.19642   | 0.262     | 1.065     |
| 5nM+NA  | 6      | 0.57565  | 0.19642   | 0.174     | 0.977     |
| +NA     | 6      | 0.04003  | 0.19642   | -0.361    | 0.441     |

Std Error uses a pooled estimate of error variance

### Means Comparisons

#### Comparisons with a control using Dunnett's Method

### Oneway Analysis of N-acetyl-glucosamine-1-phosphate By Label

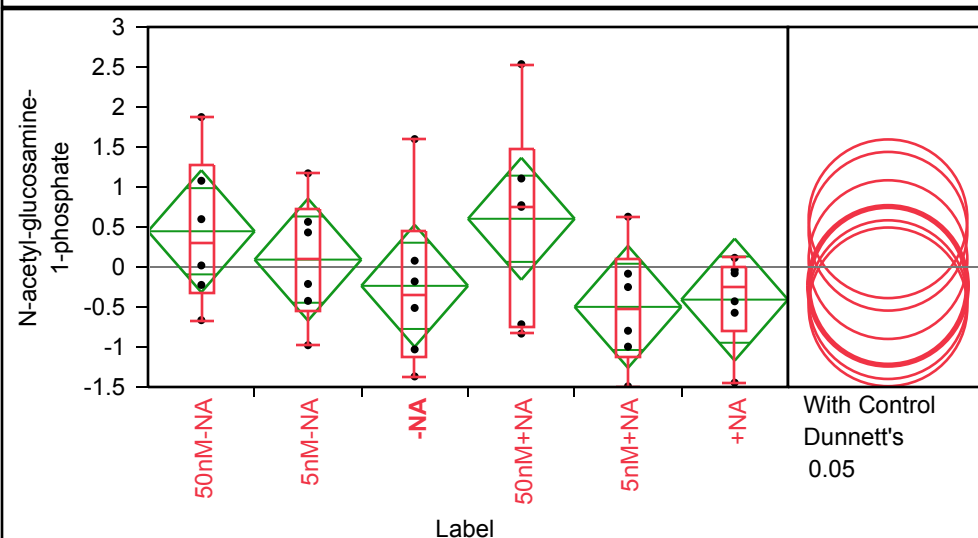

### Quantiles

| Level   | Minimum  | 10%      | 25%      | Median   | 75%      | 90%      | Maximum  |
|---------|----------|----------|----------|----------|----------|----------|----------|
| 50nM-NA | -0.66465 | -0.66465 | -0.33428 | 0.308593 | 1.276982 | 1.873894 | 1.873894 |
| 5nM-NA  | -0.97775 | -0.97775 | -0.56208 | 0.110056 | 0.715893 | 1.170779 | 1.170779 |
| -NA     | -1.36827 | -1.36827 | -1.1146  | -0.34609 | 0.458572 | 1.598815 | 1.598815 |
| 50nM+NA | -0.83275 | -0.83275 | -0.74528 | 0.762042 | 1.463448 | 2.535569 | 2.535569 |
| 5nM+NA  | -1.49141 | -1.49141 | -1.11959 | -0.52383 | 0.094202 | 0.62829  | 0.62829  |
| +NA     | -1.44612 | -1.44612 | -0.7906  | -0.25355 | 0.000943 | 0.114674 | 0.114674 |

### Oneway Anova

#### Summary of Fit

|                            |          |
|----------------------------|----------|
| Rsquare                    | 0.199509 |
| Adj Rsquare                | 0.066094 |
| Root Mean Square Error     | 0.914298 |
| Mean of Response           | 0        |
| Observations (or Sum Wgts) | 36       |

#### Analysis of Variance

| Source   | DF | Sum of Squares | Mean Square | F Ratio | Prob > F |
|----------|----|----------------|-------------|---------|----------|
| Label    | 5  | 6.250319       | 1.25006     | 1.4954  | 0.2208   |
| Error    | 30 | 25.078215      | 0.83594     |         |          |
| C. Total | 35 | 31.328534      |             |         |          |

#### Means for Oneway Anova

| Level   | Number | Mean     | Std Error | Lower 95% | Upper 95% |
|---------|--------|----------|-----------|-----------|-----------|
| 50nM-NA | 6      | 0.44671  | 0.37326   | -0.316    | 1.2090    |
| 5nM-NA  | 6      | 0.09231  | 0.37326   | -0.670    | 0.8546    |
| -NA     | 6      | -0.23553 | 0.37326   | -0.998    | 0.5268    |
| 50nM+NA | 6      | 0.60281  | 0.37326   | -0.159    | 1.3651    |
| 5nM+NA  | 6      | -0.49838 | 0.37326   | -1.261    | 0.2639    |
| +NA     | 6      | -0.40793 | 0.37326   | -1.170    | 0.3544    |

Std Error uses a pooled estimate of error variance

### Means Comparisons

#### Comparisons with a control using Dunnett's Method

### Oneway Analysis of N-acetyl-glutamine By Label

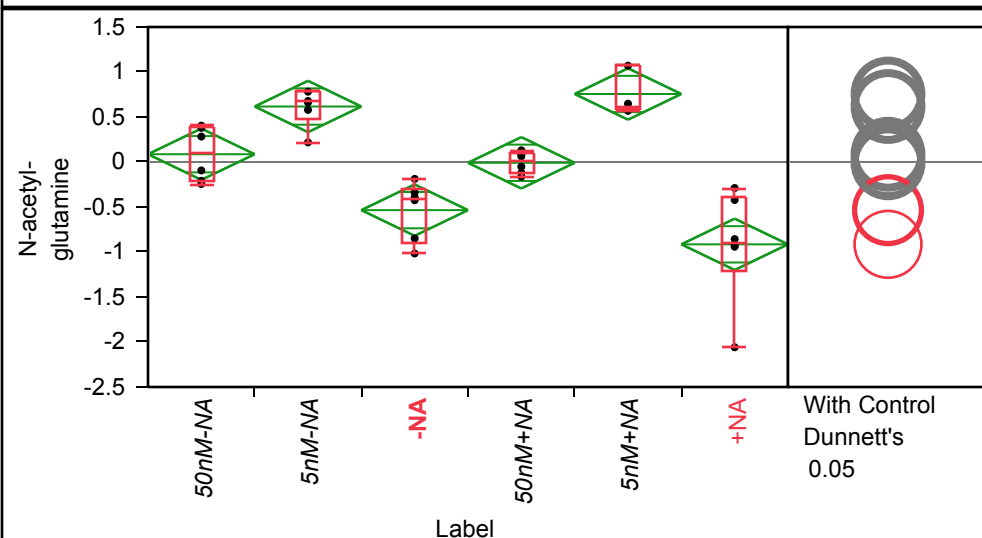

### Quantiles

| Level   | Minimum  | 10%      | 25%      | Median   | 75%      | 90%      | Maximum  |
|---------|----------|----------|----------|----------|----------|----------|----------|
| 50nM-NA | -0.24466 | -0.24466 | -0.21796 | 0.094377 | 0.385639 | 0.403666 | 0.403666 |
| 5nM-NA  | 0.217653 | 0.217653 | 0.488325 | 0.670034 | 0.781307 | 0.781409 | 0.781409 |
| -NA     | -1.01621 | -1.01621 | -0.89121 | -0.40882 | -0.30044 | -0.18789 | -0.18789 |
| 50nM+NA | -0.16298 | -0.16298 | -0.13086 | 0.005734 | 0.099365 | 0.129503 | 0.129503 |
| 5nM+NA  | 0.568824 | 0.568824 | 0.580297 | 0.621266 | 1.068584 | 1.070638 | 1.070638 |
| +NA     | -2.05865 | -2.05865 | -1.22058 | -0.88926 | -0.38859 | -0.28907 | -0.28907 |

### Oneway Anova

#### Summary of Fit

|                            |          |
|----------------------------|----------|
| Rsquare                    | 0.780386 |
| Adj Rsquare                | 0.743784 |
| Root Mean Square Error     | 0.342295 |
| Mean of Response           | 1.111e-9 |
| Observations (or Sum Wgts) | 36       |

#### Analysis of Variance

| Source   | DF | Sum of Squares | Mean Square | F Ratio | Prob > F |
|----------|----|----------------|-------------|---------|----------|
| Label    | 5  | 12.490286      | 2.49806     | 21.3207 | <.0001 * |
| Error    | 30 | 3.514981       | 0.11717     |         |          |
| C. Total | 35 | 16.005268      |             |         |          |

#### Means for Oneway Anova

| Level   | Number | Mean     | Std Error | Lower 95% | Upper 95% |
|---------|--------|----------|-----------|-----------|-----------|
| 50nM-NA | 6      | 0.08639  | 0.13974   | -0.199    | 0.372     |
| 5nM-NA  | 6      | 0.61649  | 0.13974   | 0.331     | 0.902     |
| -NA     | 6      | -0.53487 | 0.13974   | -0.820    | -0.249    |
| 50nM+NA | 6      | -0.00881 | 0.13974   | -0.294    | 0.277     |
| 5nM+NA  | 6      | 0.75567  | 0.13974   | 0.470     | 1.041     |
| +NA     | 6      | -0.91487 | 0.13974   | -1.200    | -0.629    |

Std Error uses a pooled estimate of error variance

### Means Comparisons

#### Comparisons with a control using Dunnett's Method

### Oneway Analysis of N-Acetyl-L-alanine By Label

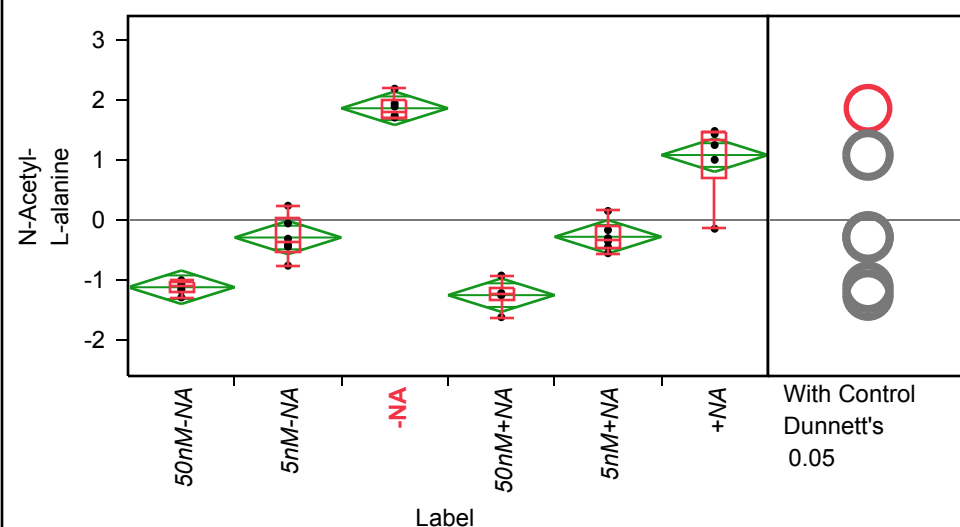

### Quantiles

| Level   | Minimum  | 10%      | 25%      | Median   | 75%      | 90%      | Maximum  |
|---------|----------|----------|----------|----------|----------|----------|----------|
| 50nM-NA | -1.29042 | -1.29042 | -1.20764 | -1.11172 | -1.02094 | -1.0039  | -1.0039  |
| 5nM-NA  | -0.7615  | -0.7615  | -0.52435 | -0.36236 | 0.016974 | 0.237483 | 0.237483 |
| -NA     | 1.705468 | 1.705468 | 1.707203 | 1.815349 | 2.002501 | 2.188442 | 2.188442 |
| 50nM+NA | -1.61963 | -1.61963 | -1.34809 | -1.24706 | -1.14438 | -0.92613 | -0.92613 |
| 5nM+NA  | -0.55485 | -0.55485 | -0.47564 | -0.32805 | -0.0887  | 0.150169 | 0.150169 |
| +NA     | -0.14537 | -0.14537 | 0.716445 | 1.341311 | 1.474145 | 1.482768 | 1.482768 |

### Oneway Anova

#### Summary of Fit

|                            |          |
|----------------------------|----------|
| Rsquare                    | 0.931693 |
| Adj Rsquare                | 0.920308 |
| Root Mean Square Error     | 0.334426 |
| Mean of Response           | 0        |
| Observations (or Sum Wgts) | 36       |

#### Analysis of Variance

| Source   | DF | Sum of Squares | Mean Square | F Ratio | Prob > F |
|----------|----|----------------|-------------|---------|----------|
| Label    | 5  | 45.764548      | 9.15291     | 81.8385 | <.0001 * |
| Error    | 30 | 3.355232       | 0.11184     |         |          |
| C. Total | 35 | 49.119780      |             |         |          |

#### Means for Oneway Anova

| Level   | Number | Mean    | Std Error | Lower 95% | Upper 95% |
|---------|--------|---------|-----------|-----------|-----------|
| 50nM-NA | 6      | -1.1207 | 0.13653   | -1.400    | -0.842    |
| 5nM-NA  | 6      | -0.2918 | 0.13653   | -0.571    | -0.013    |
| -NA     | 6      | 1.8622  | 0.13653   | 1.583     | 2.141     |
| 50nM+NA | 6      | -1.2524 | 0.13653   | -1.531    | -0.974    |
| 5nM+NA  | 6      | -0.2797 | 0.13653   | -0.559    | -0.0009   |
| +NA     | 6      | 1.0825  | 0.13653   | 0.804     | 1.361     |

Std Error uses a pooled estimate of error variance

### Means Comparisons

#### Comparisons with a control using Dunnett's Method

### Oneway Analysis of N-acetyl-L-ornithine By Label

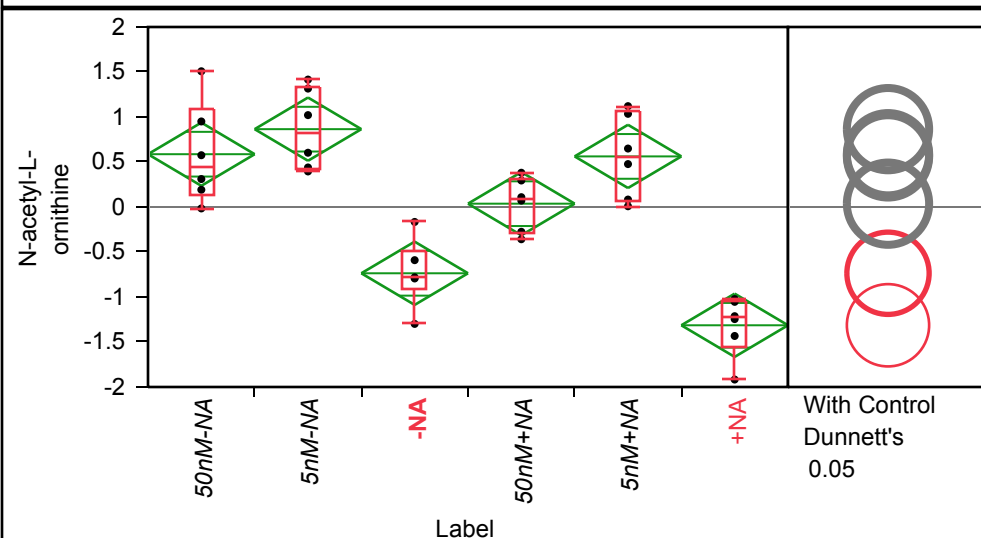

### Quantiles

| Level   | Minimum  | 10%      | 25%      | Median   | 75%      | 90%      | Maximum  |
|---------|----------|----------|----------|----------|----------|----------|----------|
| 50nM-NA | -0.01583 | -0.01583 | 0.139655 | 0.442901 | 1.089819 | 1.507972 | 1.507972 |
| 5nM-NA  | 0.39513  | 0.39513  | 0.428143 | 0.811869 | 1.340642 | 1.415675 | 1.415675 |
| -NA     | -1.29884 | -1.29884 | -0.9202  | -0.78448 | -0.48456 | -0.16601 | -0.16601 |
| 50nM+NA | -0.35832 | -0.35832 | -0.29619 | 0.090173 | 0.316032 | 0.380529 | 0.380529 |
| 5nM+NA  | 0.008275 | 0.008275 | 0.06399  | 0.563154 | 1.056605 | 1.12049  | 1.12049  |
| +NA     | -1.91711 | -1.91711 | -1.55409 | -1.22931 | -1.04597 | -1.02265 | -1.02265 |

### Oneway Anova

#### Summary of Fit

|                            |          |
|----------------------------|----------|
| Rsquare                    | 0.805611 |
| Adj Rsquare                | 0.773213 |
| Root Mean Square Error     | 0.42136  |
| Mean of Response           | 5.56e-11 |
| Observations (or Sum Wgts) | 36       |

#### Analysis of Variance

| Source   | DF | Sum of Squares | Mean Square | F Ratio | Prob > F |
|----------|----|----------------|-------------|---------|----------|
| Label    | 5  | 22.074050      | 4.41481     | 24.8660 | <.0001 * |
| Error    | 30 | 5.326319       | 0.17754     |         |          |
| C. Total | 35 | 27.400368      |             |         |          |

#### Means for Oneway Anova

| Level   | Number | Mean    | Std Error | Lower 95% | Upper 95% |
|---------|--------|---------|-----------|-----------|-----------|
| 50nM-NA | 6      | 0.5866  | 0.17202   | 0.235     | 0.938     |
| 5nM-NA  | 6      | 0.8649  | 0.17202   | 0.514     | 1.216     |
| -NA     | 6      | -0.7364 | 0.17202   | -1.088    | -0.385    |
| 50nM+NA | 6      | 0.0369  | 0.17202   | -0.314    | 0.388     |
| 5nM+NA  | 6      | 0.5622  | 0.17202   | 0.211     | 0.913     |
| +NA     | 6      | -1.3142 | 0.17202   | -1.666    | -0.963    |

Std Error uses a pooled estimate of error variance

### Means Comparisons

#### Comparisons with a control using Dunnett's Method

### Oneway Analysis of N-Acetylputrescine By Label

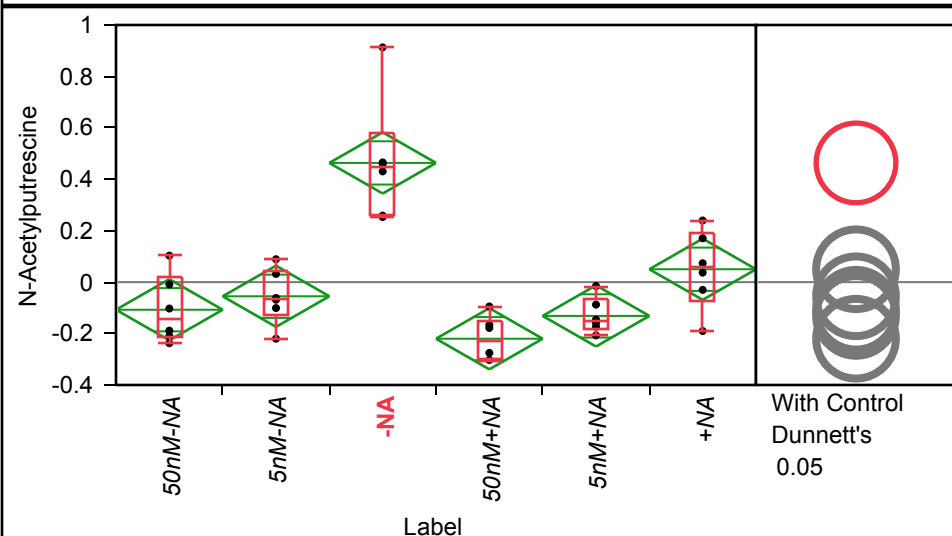

### Quantiles

| Level   | Minimum  | 10%      | 25%      | Median   | 75%      | 90%      | Maximum  |
|---------|----------|----------|----------|----------|----------|----------|----------|
| 50nM-NA | -0.23748 | -0.23748 | -0.21664 | -0.14566 | 0.019355 | 0.103052 | 0.103052 |
| 5nM-NA  | -0.21999 | -0.21999 | -0.13068 | -0.06502 | 0.046194 | 0.089047 | 0.089047 |
| -NA     | 0.253256 | 0.253256 | 0.257317 | 0.445633 | 0.577363 | 0.912818 | 0.912818 |
| 50nM+NA | -0.30278 | -0.30278 | -0.3027  | -0.22669 | -0.1488  | -0.09466 | -0.09466 |
| 5nM+NA  | -0.20716 | -0.20716 | -0.18224 | -0.15215 | -0.06937 | -0.01524 | -0.01524 |
| +NA     | -0.19003 | -0.19003 | -0.07003 | 0.055242 | 0.187966 | 0.239648 | 0.239648 |

### Oneway Anova

#### Summary of Fit

|                            |          |
|----------------------------|----------|
| Rsquare                    | 0.744998 |
| Adj Rsquare                | 0.702498 |
| Root Mean Square Error     | 0.142746 |
| Mean of Response           | -1.1e-10 |
| Observations (or Sum Wgts) | 36       |

#### Analysis of Variance

| Source   | DF | Sum of Squares | Mean Square | F Ratio | Prob > F |
|----------|----|----------------|-------------|---------|----------|
| Label    | 5  | 1.7859141      | 0.357183    | 17.5293 | <.0001 * |
| Error    | 30 | 0.6112913      | 0.020376    |         |          |
| C. Total | 35 | 2.3972054      |             |         |          |

#### Means for Oneway Anova

| Level   | Number | Mean     | Std Error | Lower 95% | Upper 95% |
|---------|--------|----------|-----------|-----------|-----------|
| 50nM-NA | 6      | -0.10733 | 0.05828   | -0.2263   | 0.0117    |
| 5nM-NA  | 6      | -0.05500 | 0.05828   | -0.1740   | 0.0640    |
| -NA     | 6      | 0.46359  | 0.05828   | 0.3446    | 0.5826    |
| 50nM+NA | 6      | -0.22006 | 0.05828   | -0.3391   | -0.1010   |
| 5nM+NA  | 6      | -0.13134 | 0.05828   | -0.2504   | -0.0123   |
| +NA     | 6      | 0.05014  | 0.05828   | -0.0689   | 0.1692    |

Std Error uses a pooled estimate of error variance

### Means Comparisons

#### Comparisons with a control using Dunnett's Method

### Oneway Analysis of NAD By Label

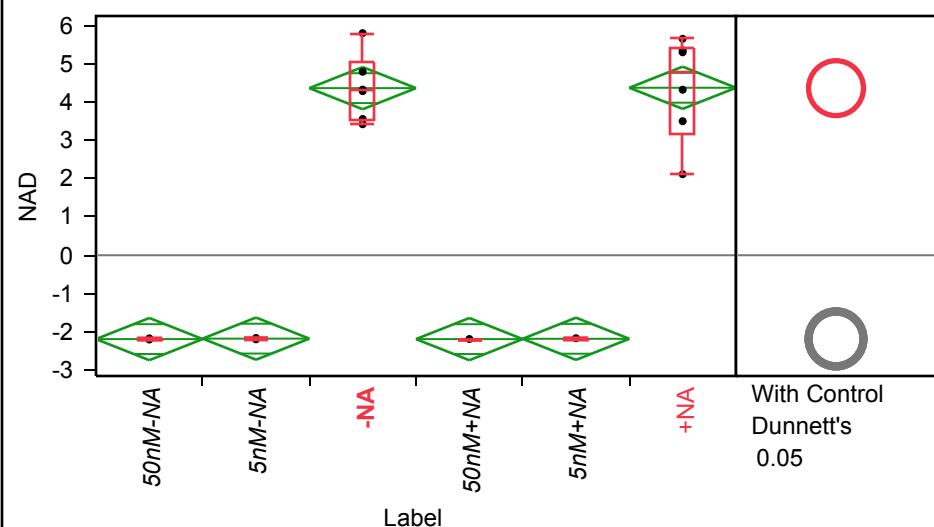

### Quantiles

| Level   | Minimum  | 10%      | 25%      | Median   | 75%      | 90%      | Maximum  |
|---------|----------|----------|----------|----------|----------|----------|----------|
| 50nM-NA | -2.20143 | -2.20143 | -2.19685 | -2.19217 | -2.18349 | -2.17179 | -2.17179 |
| 5nM-NA  | -2.19576 | -2.19576 | -2.18665 | -2.17684 | -2.17058 | -2.16045 | -2.16045 |
| -NA     | 3.422451 | 3.422451 | 3.524903 | 4.307548 | 5.045661 | 5.801577 | 5.801577 |
| 50nM+NA | -2.19131 | -2.19131 | -2.19124 | -2.19079 | -2.18988 | -2.18876 | -2.18876 |
| 5nM+NA  | -2.19002 | -2.19002 | -2.18773 | -2.18421 | -2.1776  | -2.16768 | -2.16768 |
| +NA     | 2.117008 | 2.117008 | 3.155877 | 4.813003 | 5.429035 | 5.653624 | 5.653624 |

### Oneway Anova

#### Summary of Fit

|                            |          |
|----------------------------|----------|
| Rsquare                    | 0.963266 |
| Adj Rsquare                | 0.957143 |
| Root Mean Square Error     | 0.661089 |
| Mean of Response           | -2.78e-8 |
| Observations (or Sum Wgts) | 36       |

#### Analysis of Variance

| Source   | DF | Sum of Squares | Mean Square | F Ratio  | Prob > F |
|----------|----|----------------|-------------|----------|----------|
| Label    | 5  | 343.80869      | 68.7617     | 157.3356 | <.0001 * |
| Error    | 30 | 13.11116       | 0.4370      |          |          |
| C. Total | 35 | 356.91985      |             |          |          |

#### Means for Oneway Anova

| Level   | Number | Mean    | Std Error | Lower 95% | Upper 95% |
|---------|--------|---------|-----------|-----------|-----------|
| 50nM-NA | 6      | -2.1900 | 0.26989   | -2.741    | -1.639    |
| 5nM-NA  | 6      | -2.1779 | 0.26989   | -2.729    | -1.627    |
| -NA     | 6      | 4.3653  | 0.26989   | 3.814     | 4.916     |
| 50nM+NA | 6      | -2.1905 | 0.26989   | -2.742    | -1.639    |
| 5nM+NA  | 6      | -2.1823 | 0.26989   | -2.734    | -1.631    |
| +NA     | 6      | 4.3755  | 0.26989   | 3.824     | 4.927     |

Std Error uses a pooled estimate of error variance

### Means Comparisons

#### Comparisons with a control using Dunnett's Method

### Oneway Analysis of NADH By Label

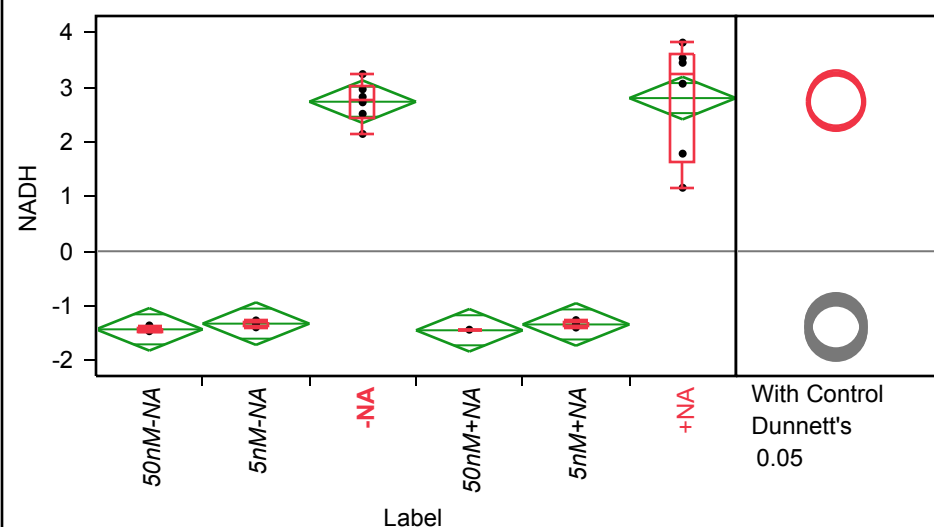

### Quantiles

| Level   | Minimum  | 10%      | 25%      | Median   | 75%      | 90%      | Maximum  |
|---------|----------|----------|----------|----------|----------|----------|----------|
| 50nM-NA | -1.46195 | -1.46195 | -1.46149 | -1.43946 | -1.3925  | -1.35619 | -1.35619 |
| 5nM-NA  | -1.39043 | -1.39043 | -1.37456 | -1.30916 | -1.2882  | -1.26429 | -1.26429 |
| -NA     | 2.14431  | 2.14431  | 2.420294 | 2.77214  | 3.02977  | 3.238229 | 3.238229 |
| 50nM+NA | -1.45087 | -1.45087 | -1.44879 | -1.4468  | -1.439   | -1.43396 | -1.43396 |
| 5nM+NA  | -1.39448 | -1.39448 | -1.38389 | -1.34903 | -1.28623 | -1.25871 | -1.25871 |
| +NA     | 1.160839 | 1.160839 | 1.628253 | 3.253598 | 3.601238 | 3.813845 | 3.813845 |

### Oneway Anova

#### Summary of Fit

|                            |          |
|----------------------------|----------|
| Rsquare                    | 0.9549   |
| Adj Rsquare                | 0.947383 |
| Root Mean Square Error     | 0.465818 |
| Mean of Response           | 1.97e-16 |
| Observations (or Sum Wgts) | 36       |

#### Analysis of Variance

| Source   | DF | Sum of Squares | Mean Square | F Ratio  | Prob > F |
|----------|----|----------------|-------------|----------|----------|
| Label    | 5  | 137.82562      | 27.5651     | 127.0364 | <.0001 * |
| Error    | 30 | 6.50958        | 0.2170      |          |          |
| C. Total | 35 | 144.33520      |             |          |          |

#### Means for Oneway Anova

| Level   | Number | Mean    | Std Error | Lower 95% | Upper 95% |
|---------|--------|---------|-----------|-----------|-----------|
| 50nM-NA | 6      | -1.4272 | 0.19017   | -1.816    | -1.039    |
| 5nM-NA  | 6      | -1.3231 | 0.19017   | -1.711    | -0.935    |
| -NA     | 6      | 2.7332  | 0.19017   | 2.345     | 3.122     |
| 50nM+NA | 6      | -1.4445 | 0.19017   | -1.833    | -1.056    |
| 5nM+NA  | 6      | -1.3378 | 0.19017   | -1.726    | -0.949    |
| +NA     | 6      | 2.7994  | 0.19017   | 2.411     | 3.188     |

Std Error uses a pooled estimate of error variance

### Means Comparisons

#### Comparisons with a control using Dunnett's Method

### Oneway Analysis of NADP By Label

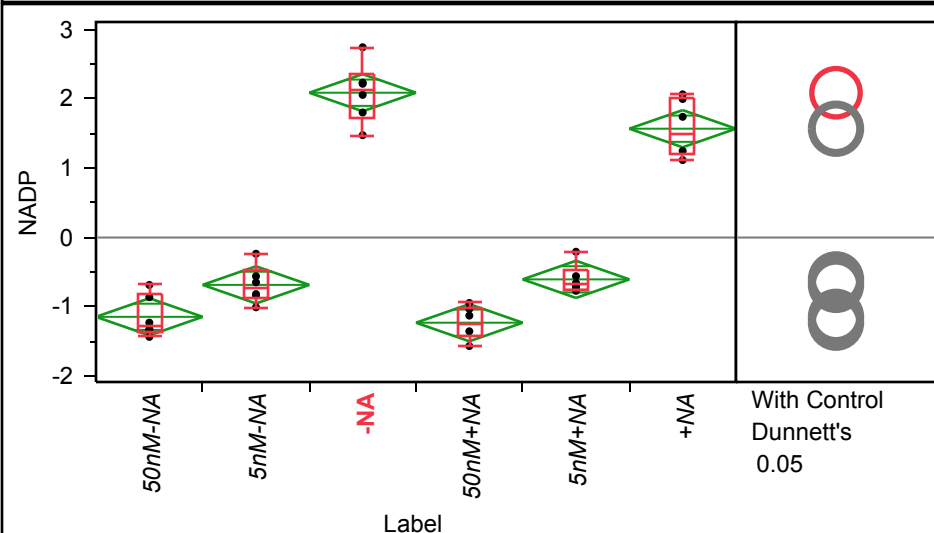

### Quantiles

| Level   | Minimum  | 10%      | 25%      | Median   | 75%      | 90%      | Maximum  |
|---------|----------|----------|----------|----------|----------|----------|----------|
| 50nM-NA | -1.4339  | -1.4339  | -1.362   | -1.27532 | -0.81682 | -0.68454 | -0.68454 |
| 5nM-NA  | -1.0064  | -1.0064  | -0.87989 | -0.73197 | -0.47723 | -0.23394 | -0.23394 |
| -NA     | 1.477346 | 1.477346 | 1.722864 | 2.139119 | 2.36285  | 2.746087 | 2.746087 |
| 50nM+NA | -1.56628 | -1.56628 | -1.40695 | -1.24027 | -1.00906 | -0.94418 | -0.94418 |
| 5nM+NA  | -0.76877 | -0.76877 | -0.74466 | -0.67748 | -0.46944 | -0.20514 | -0.20514 |
| +NA     | 1.118233 | 1.118233 | 1.215428 | 1.49641  | 2.016624 | 2.066547 | 2.066547 |

### Oneway Anova

#### Summary of Fit

|                            |          |
|----------------------------|----------|
| Rsquare                    | 0.952949 |
| Adj Rsquare                | 0.945108 |
| Root Mean Square Error     | 0.321845 |
| Mean of Response           | -8.33e-9 |
| Observations (or Sum Wgts) | 36       |

#### Analysis of Variance

| Source   | DF | Sum of Squares | Mean Square | F Ratio  | Prob > F |
|----------|----|----------------|-------------|----------|----------|
| Label    | 5  | 62.939003      | 12.5878     | 121.5221 | <.0001 * |
| Error    | 30 | 3.107534       | 0.1036      |          |          |
| C. Total | 35 | 66.046537      |             |          |          |

#### Means for Oneway Anova

| Level   | Number | Mean    | Std Error | Lower 95% | Upper 95% |
|---------|--------|---------|-----------|-----------|-----------|
| 50nM-NA | 6      | -1.1447 | 0.13139   | -1.413    | -0.876    |
| 5nM-NA  | 6      | -0.6834 | 0.13139   | -0.952    | -0.415    |
| -NA     | 6      | 2.0902  | 0.13139   | 1.822     | 2.359     |
| 50nM+NA | 6      | -1.2293 | 0.13139   | -1.498    | -0.961    |
| 5nM+NA  | 6      | -0.6038 | 0.13139   | -0.872    | -0.335    |
| +NA     | 6      | 1.5709  | 0.13139   | 1.303     | 1.839     |

Std Error uses a pooled estimate of error variance

### Means Comparisons

#### Comparisons with a control using Dunnett's Method

### Oneway Analysis of N-carbamoyl-L-aspartate By Label

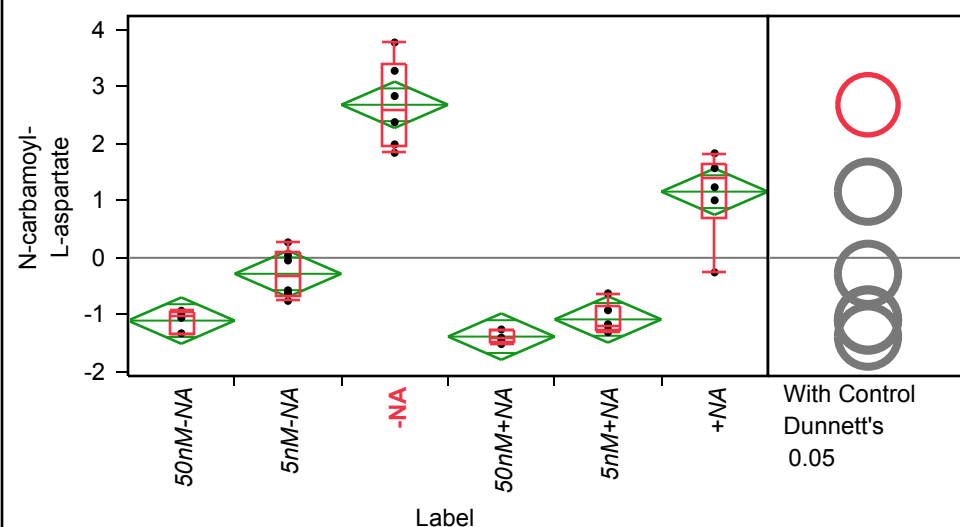

### Quantiles

| Level   | Minimum  | 10%      | 25%      | Median   | 75%      | 90%      | Maximum  |
|---------|----------|----------|----------|----------|----------|----------|----------|
| 50nM-NA | -1.32824 | -1.32824 | -1.32324 | -1.03294 | -0.94752 | -0.92624 | -0.92624 |
| 5nM-NA  | -0.75415 | -0.75415 | -0.65472 | -0.30791 | 0.098687 | 0.270195 | 0.270195 |
| -NA     | 1.837594 | 1.837594 | 1.94864  | 2.603852 | 3.397625 | 3.769718 | 3.769718 |
| 50nM+NA | -1.511   | -1.511   | -1.46231 | -1.40188 | -1.25984 | -1.25395 | -1.25395 |
| 5nM+NA  | -1.30283 | -1.30283 | -1.27853 | -1.1786  | -0.84411 | -0.62212 | -0.62212 |
| +NA     | -0.25515 | -0.25515 | 0.691355 | 1.399701 | 1.633619 | 1.830179 | 1.830179 |

### Oneway Anova

#### Summary of Fit

|                            |          |
|----------------------------|----------|
| Rsquare                    | 0.915808 |
| Adj Rsquare                | 0.901776 |
| Root Mean Square Error     | 0.486483 |
| Mean of Response           | -7.4e-17 |
| Observations (or Sum Wgts) | 36       |

#### Analysis of Variance

| Source   | DF | Sum of Squares | Mean Square | F Ratio | Prob > F |
|----------|----|----------------|-------------|---------|----------|
| Label    | 5  | 77.230605      | 15.4461     | 65.2657 | <.0001 * |
| Error    | 30 | 7.099960       | 0.2367      |         |          |
| C. Total | 35 | 84.330566      |             |         |          |

#### Means for Oneway Anova

| Level   | Number | Mean    | Std Error | Lower 95% | Upper 95% |
|---------|--------|---------|-----------|-----------|-----------|
| 50nM-NA | 6      | -1.0994 | 0.19861   | -1.505    | -0.694    |
| 5nM-NA  | 6      | -0.2800 | 0.19861   | -0.686    | 0.126     |
| -NA     | 6      | 2.6790  | 0.19861   | 2.273     | 3.085     |
| 50nM+NA | 6      | -1.3794 | 0.19861   | -1.785    | -0.974    |
| 5nM+NA  | 6      | -1.0784 | 0.19861   | -1.484    | -0.673    |
| +NA     | 6      | 1.1582  | 0.19861   | 0.753     | 1.564     |

Std Error uses a pooled estimate of error variance

### Means Comparisons

#### Comparisons with a control using Dunnett's Method

### Oneway Analysis of N-Formylglycinamide ribonucleotide By Label

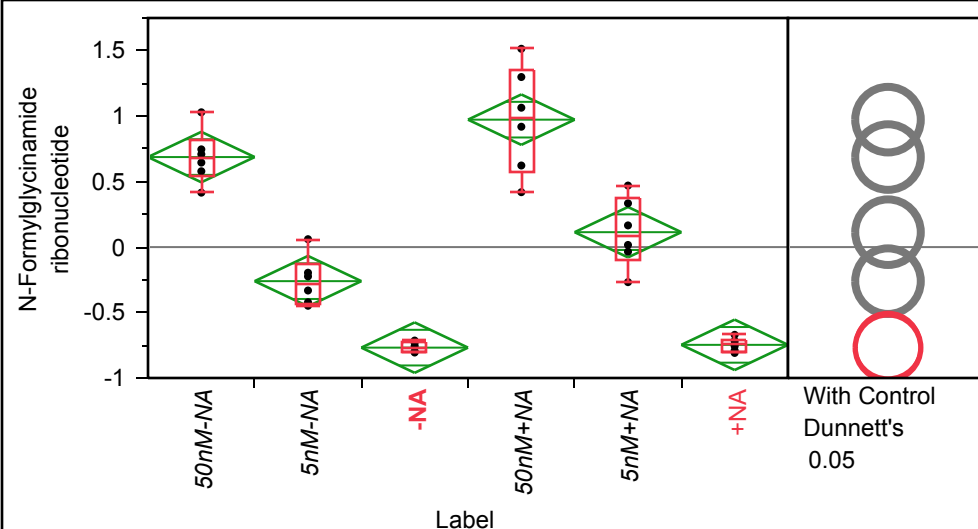

#### Quantiles

| Level   | Minimum  | 10%      | 25%      | Median   | 75%      | 90%      | Maximum  |
|---------|----------|----------|----------|----------|----------|----------|----------|
| 50nM-NA | 0.41588  | 0.41588  | 0.53836  | 0.67752  | 0.817303 | 1.029653 | 1.029653 |
| 5nM-NA  | -0.44818 | -0.44818 | -0.42834 | -0.27781 | -0.13183 | 0.060256 | 0.060256 |
| -NA     | -0.80729 | -0.80729 | -0.80574 | -0.77581 | -0.72605 | -0.71407 | -0.71407 |
| 50nM+NA | 0.419433 | 0.419433 | 0.572236 | 0.992035 | 1.353033 | 1.514853 | 1.514853 |
| 5nM+NA  | -0.26775 | -0.26775 | -0.09336 | 0.090977 | 0.368204 | 0.46999  | 0.46999  |
| +NA     | -0.80846 | -0.80846 | -0.79479 | -0.74791 | -0.70452 | -0.6703  | -0.6703  |

#### Oneway Anova

##### Summary of Fit

|                            |          |
|----------------------------|----------|
| Rsquare                    | 0.908566 |
| Adj Rsquare                | 0.893328 |
| Root Mean Square Error     | 0.230894 |
| Mean of Response           | 5.56e-10 |
| Observations (or Sum Wgts) | 36       |

##### Analysis of Variance

| Source   | DF | Sum of Squares | Mean Square | F Ratio | Prob > F |
|----------|----|----------------|-------------|---------|----------|
| Label    | 5  | 15.892695      | 3.17854     | 59.6214 | <.0001 * |
| Error    | 30 | 1.599361       | 0.05331     |         |          |
| C. Total | 35 | 17.492055      |             |         |          |

##### Means for Oneway Anova

| Level   | Number | Mean     | Std Error | Lower 95% | Upper 95% |
|---------|--------|----------|-----------|-----------|-----------|
| 50nM-NA | 6      | 0.68771  | 0.09426   | 0.4952    | 0.880     |
| 5nM-NA  | 6      | -0.26019 | 0.09426   | -0.4527   | -0.068    |
| -NA     | 6      | -0.76804 | 0.09426   | -0.9606   | -0.576    |
| 50nM+NA | 6      | 0.97344  | 0.09426   | 0.7809    | 1.166     |
| 5nM+NA  | 6      | 0.11387  | 0.09426   | -0.0786   | 0.306     |
| +NA     | 6      | -0.74679 | 0.09426   | -0.9393   | -0.554    |

Std Error uses a pooled estimate of error variance

#### Means Comparisons

##### Comparisons with a control using Dunnett's Method

### Oneway Analysis of Ng,NG-dimethyl-L-arginine By Label

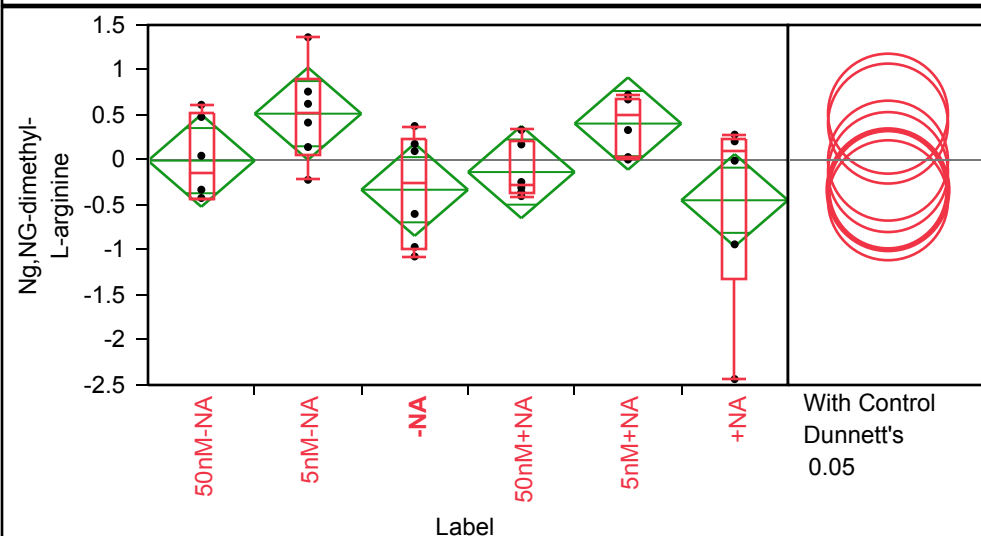

### Quantiles

| Level   | Minimum  | 10%      | 25%      | Median   | 75%      | 90%      | Maximum  |
|---------|----------|----------|----------|----------|----------|----------|----------|
| 50nM-NA | -0.43008 | -0.43008 | -0.42427 | -0.14138 | 0.512049 | 0.613396 | 0.613396 |
| 5nM-NA  | -0.21992 | -0.21992 | 0.052959 | 0.52001  | 0.910874 | 1.363612 | 1.363612 |
| -NA     | -1.07182 | -1.07182 | -0.99283 | -0.25005 | 0.228126 | 0.377531 | 0.377531 |
| 50nM+NA | -0.40148 | -0.40148 | -0.36896 | -0.27618 | 0.213151 | 0.333683 | 0.333683 |
| 5nM+NA  | 0.005081 | 0.005081 | 0.025302 | 0.497443 | 0.685426 | 0.723487 | 0.723487 |
| +NA     | -2.43449 | -2.43449 | -1.31168 | 0.099134 | 0.226165 | 0.28148  | 0.28148  |

### Oneway Anova

#### Summary of Fit

|                            |          |
|----------------------------|----------|
| Rsquare                    | 0.286088 |
| Adj Rsquare                | 0.167102 |
| Root Mean Square Error     | 0.614263 |
| Mean of Response           | 2.78e-11 |
| Observations (or Sum Wgts) | 36       |

#### Analysis of Variance

| Source   | DF | Sum of Squares | Mean Square | F Ratio | Prob > F |
|----------|----|----------------|-------------|---------|----------|
| Label    | 5  | 4.536113       | 0.907223    | 2.4044  | 0.0601   |
| Error    | 30 | 11.319556      | 0.377319    |         |          |
| C. Total | 35 | 15.855669      |             |         |          |

#### Means for Oneway Anova

| Level   | Number | Mean     | Std Error | Lower 95% | Upper 95% |
|---------|--------|----------|-----------|-----------|-----------|
| 50nM-NA | 6      | -0.00725 | 0.25077   | -0.5194   | 0.5049    |
| 5nM-NA  | 6      | 0.51460  | 0.25077   | 0.0025    | 1.0267    |
| -NA     | 6      | -0.33043 | 0.25077   | -0.8426   | 0.1817    |
| 50nM+NA | 6      | -0.13422 | 0.25077   | -0.6464   | 0.3779    |
| 5nM+NA  | 6      | 0.40471  | 0.25077   | -0.1074   | 0.9168    |
| +NA     | 6      | -0.44740 | 0.25077   | -0.9595   | 0.0647    |

Std Error uses a pooled estimate of error variance

### Means Comparisons

#### Comparisons with a control using Dunnett's Method

### Oneway Analysis of Nicotinamide By Label

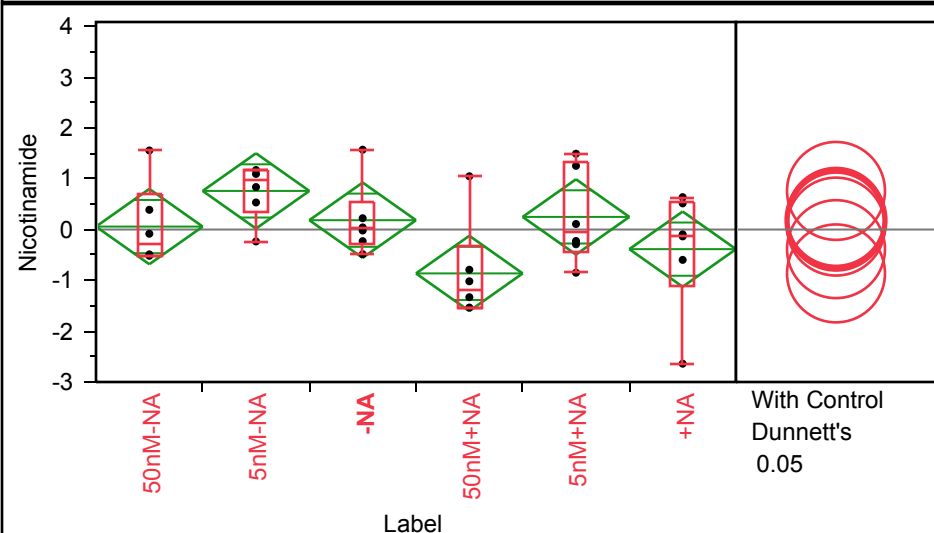

### Quantiles

| Level   | Minimum  | 10%      | 25%      | Median   | 75%      | 90%      | Maximum  |
|---------|----------|----------|----------|----------|----------|----------|----------|
| 50nM-NA | -0.51632 | -0.51632 | -0.50968 | -0.28593 | 0.679843 | 1.555235 | 1.555235 |
| 5nM-NA  | -0.23445 | -0.23445 | 0.340704 | 0.964811 | 1.161922 | 1.171148 | 1.171148 |
| -NA     | -0.48564 | -0.48564 | -0.29321 | 0.011468 | 0.559331 | 1.570586 | 1.570586 |
| 50nM+NA | -1.55211 | -1.55211 | -1.53951 | -1.17506 | -0.33143 | 1.047969 | 1.047969 |
| 5nM+NA  | -0.84899 | -0.84899 | -0.42959 | -0.05838 | 1.31304  | 1.492062 | 1.492062 |
| +NA     | -2.63956 | -2.63956 | -1.10783 | -0.11501 | 0.54515  | 0.636875 | 0.636875 |

### Oneway Anova

#### Summary of Fit

|                            |          |
|----------------------------|----------|
| Rsquare                    | 0.284782 |
| Adj Rsquare                | 0.165579 |
| Root Mean Square Error     | 0.888079 |
| Mean of Response           | 1.23e-17 |
| Observations (or Sum Wgts) | 36       |

#### Analysis of Variance

| Source   | DF | Sum of Squares | Mean Square | F Ratio | Prob > F |
|----------|----|----------------|-------------|---------|----------|
| Label    | 5  | 9.421021       | 1.88420     | 2.3890  | 0.0614   |
| Error    | 30 | 23.660545      | 0.78868     |         |          |
| C. Total | 35 | 33.081566      |             |         |          |

#### Means for Oneway Anova

| Level   | Number | Mean     | Std Error | Lower 95% | Upper 95% |
|---------|--------|----------|-----------|-----------|-----------|
| 50nM-NA | 6      | 0.05794  | 0.36256   | -0.683    | 0.798     |
| 5nM-NA  | 6      | 0.75960  | 0.36256   | 0.019     | 1.500     |
| -NA     | 6      | 0.18351  | 0.36256   | -0.557    | 0.924     |
| 50nM+NA | 6      | -0.86346 | 0.36256   | -1.604    | -0.123    |
| 5nM+NA  | 6      | 0.24831  | 0.36256   | -0.492    | 0.989     |
| +NA     | 6      | -0.38590 | 0.36256   | -1.126    | 0.355     |

Std Error uses a pooled estimate of error variance

### Means Comparisons

#### Comparisons with a control using Dunnett's Method

### Oneway Analysis of Nicotinamide ribotide By Label

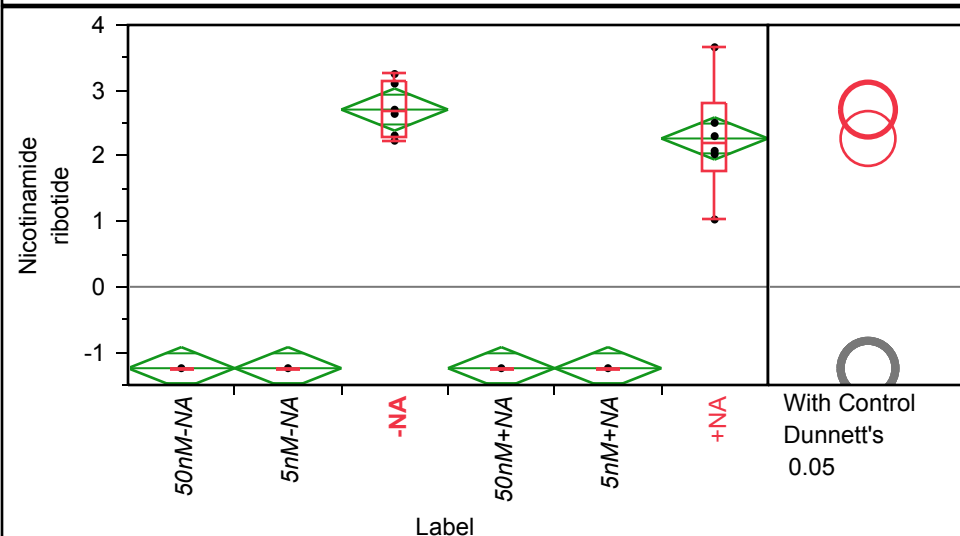

### Quantiles

| Level   | Minimum  | 10%      | 25%      | Median   | 75%      | 90%      | Maximum  |
|---------|----------|----------|----------|----------|----------|----------|----------|
| 50nM-NA | -1.24358 | -1.24358 | -1.24356 | -1.24354 | -1.24349 | -1.24344 | -1.24344 |
| 5nM-NA  | -1.24357 | -1.24357 | -1.24352 | -1.24347 | -1.24343 | -1.24341 | -1.24341 |
| -NA     | 2.231892 | 2.231892 | 2.290642 | 2.67388  | 3.141905 | 3.25152  | 3.25152  |
| 50nM+NA | -1.24357 | -1.24357 | -1.24356 | -1.24355 | -1.24352 | -1.24352 | -1.24352 |
| 5nM+NA  | -1.2436  | -1.2436  | -1.24358 | -1.24354 | -1.24349 | -1.24347 | -1.24347 |
| +NA     | 1.028179 | 1.028179 | 1.776601 | 2.18939  | 2.793607 | 3.659868 | 3.659868 |

### Oneway Anova

#### Summary of Fit

|                            |          |
|----------------------------|----------|
| Rsquare                    | 0.961602 |
| Adj Rsquare                | 0.955202 |
| Root Mean Square Error     | 0.385971 |
| Mean of Response           | -2.78e-8 |
| Observations (or Sum Wgts) | 36       |

#### Analysis of Variance

| Source   | DF | Sum of Squares | Mean Square | F Ratio  | Prob > F |
|----------|----|----------------|-------------|----------|----------|
| Label    | 5  | 111.92166      | 22.3843     | 150.2574 | <.0001 * |
| Error    | 30 | 4.46920        | 0.1490      |          |          |
| C. Total | 35 | 116.39086      |             |          |          |

#### Means for Oneway Anova

| Level   | Number | Mean    | Std Error | Lower 95% | Upper 95% |
|---------|--------|---------|-----------|-----------|-----------|
| 50nM-NA | 6      | -1.2435 | 0.15757   | -1.565    | -0.922    |
| 5nM-NA  | 6      | -1.2435 | 0.15757   | -1.565    | -0.922    |
| -NA     | 6      | 2.7078  | 0.15757   | 2.386     | 3.030     |
| 50nM+NA | 6      | -1.2435 | 0.15757   | -1.565    | -0.922    |
| 5nM+NA  | 6      | -1.2435 | 0.15757   | -1.565    | -0.922    |
| +NA     | 6      | 2.2663  | 0.15757   | 1.944     | 2.588     |

Std Error uses a pooled estimate of error variance

### Means Comparisons

#### Comparisons with a control using Dunnett's Method

### Oneway Analysis of Nicotinic acid By Label

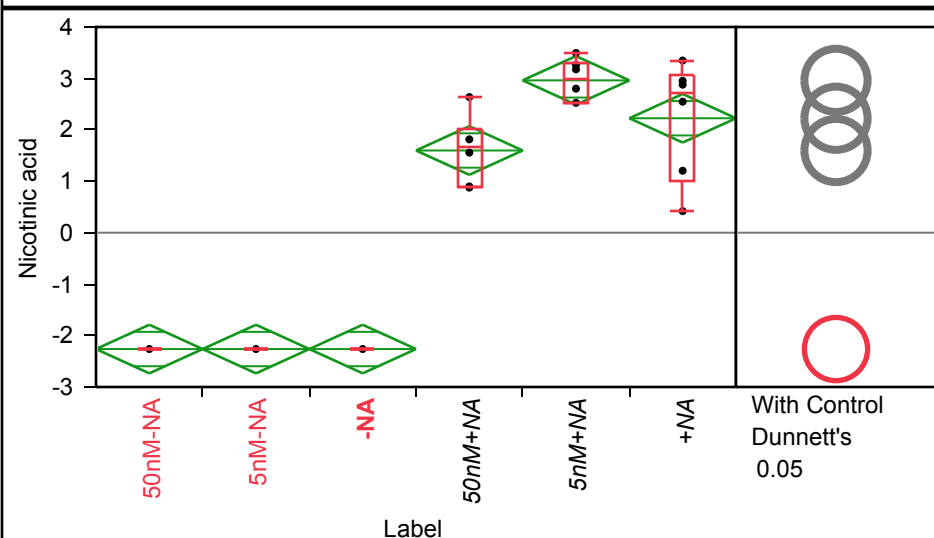

### Quantiles

| Level   | Minimum  | 10%      | 25%      | Median   | 75%      | 90%      | Maximum  |
|---------|----------|----------|----------|----------|----------|----------|----------|
| 50nM-NA | -2.26218 | -2.26218 | -2.26217 | -2.26215 | -2.26211 | -2.26207 | -2.26207 |
| 5nM-NA  | -2.26218 | -2.26218 | -2.26213 | -2.2621  | -2.26206 | -2.26205 | -2.26205 |
| -NA     | -2.26214 | -2.26214 | -2.26212 | -2.2621  | -2.26208 | -2.26206 | -2.26206 |
| 50nM+NA | 0.87653  | 0.87653  | 0.894293 | 1.68106  | 2.021086 | 2.637433 | 2.637433 |
| 5nM+NA  | 2.515783 | 2.515783 | 2.523405 | 2.988662 | 3.318307 | 3.494872 | 3.494872 |
| +NA     | 0.419808 | 0.419808 | 1.009014 | 2.713184 | 3.051871 | 3.347998 | 3.347998 |

### Oneway Anova

#### Summary of Fit

|                            |          |
|----------------------------|----------|
| Rsquare                    | 0.951694 |
| Adj Rsquare                | 0.943643 |
| Root Mean Square Error     | 0.566692 |
| Mean of Response           | -1.39e-8 |
| Observations (or Sum Wgts) | 36       |

#### Analysis of Variance

| Source   | DF | Sum of Squares | Mean Square | F Ratio  | Prob > F |
|----------|----|----------------|-------------|----------|----------|
| Label    | 5  | 189.80795      | 37.9616     | 118.2088 | <.0001 * |
| Error    | 30 | 9.63420        | 0.3211      |          |          |
| C. Total | 35 | 199.44216      |             |          |          |

#### Means for Oneway Anova

| Level   | Number | Mean    | Std Error | Lower 95% | Upper 95% |
|---------|--------|---------|-----------|-----------|-----------|
| 50nM-NA | 6      | -2.2621 | 0.23135   | -2.735    | -1.790    |
| 5nM-NA  | 6      | -2.2621 | 0.23135   | -2.735    | -1.790    |
| -NA     | 6      | -2.2621 | 0.23135   | -2.735    | -1.790    |
| 50nM+NA | 6      | 1.5987  | 0.23135   | 1.126     | 2.071     |
| 5nM+NA  | 6      | 2.9622  | 0.23135   | 2.490     | 3.435     |
| +NA     | 6      | 2.2255  | 0.23135   | 1.753     | 2.698     |

Std Error uses a pooled estimate of error variance

### Means Comparisons

#### Comparisons with a control using Dunnett's Method

### Oneway Analysis of Nicotyrine By Label

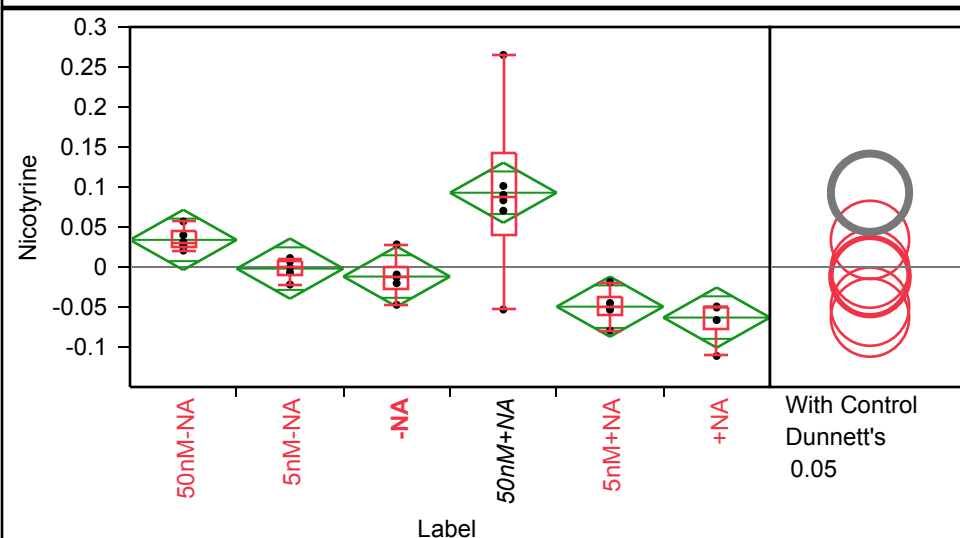

### Quantiles

| Level   | Minimum  | 10%      | 25%      | Median   | 75%      | 90%      | Maximum  |
|---------|----------|----------|----------|----------|----------|----------|----------|
| 50nM-NA | 0.020548 | 0.020548 | 0.024921 | 0.02988  | 0.044095 | 0.056877 | 0.056877 |
| 5nM-NA  | -0.02192 | -0.02192 | -0.01062 | -0.00084 | 0.00816  | 0.01114  | 0.01114  |
| -NA     | -0.0473  | -0.0473  | -0.02706 | -0.01146 | 2.938e-5 | 0.028264 | 0.028264 |
| 50nM+NA | -0.05314 | -0.05314 | 0.039472 | 0.086759 | 0.142246 | 0.265133 | 0.265133 |
| 5nM+NA  | -0.07952 | -0.07952 | -0.06003 | -0.05033 | -0.03845 | -0.01878 | -0.01878 |
| +NA     | -0.11118 | -0.11118 | -0.07758 | -0.05116 | -0.04986 | -0.04933 | -0.04933 |

### Oneway Anova

#### Summary of Fit

|                            |          |
|----------------------------|----------|
| Rsquare                    | 0.616981 |
| Adj Rsquare                | 0.553145 |
| Root Mean Square Error     | 0.045086 |
| Mean of Response           | -2.8e-11 |
| Observations (or Sum Wgts) | 36       |

#### Analysis of Variance

| Source   | DF | Sum of Squares | Mean Square | F Ratio | Prob > F |
|----------|----|----------------|-------------|---------|----------|
| Label    | 5  | 0.09823175     | 0.019646    | 9.6650  | <.0001 * |
| Error    | 30 | 0.06098181     | 0.002033    |         |          |
| C. Total | 35 | 0.15921356     |             |         |          |

#### Means for Oneway Anova

| Level   | Number | Mean     | Std Error | Lower 95% | Upper 95% |
|---------|--------|----------|-----------|-----------|-----------|
| 50nM-NA | 6      | 0.03390  | 0.01841   | -0.0037   | 0.0715    |
| 5nM-NA  | 6      | -0.00202 | 0.01841   | -0.0396   | 0.0356    |
| -NA     | 6      | -0.01194 | 0.01841   | -0.0495   | 0.0257    |
| 50nM+NA | 6      | 0.09286  | 0.01841   | 0.0553    | 0.1304    |
| 5nM+NA  | 6      | -0.04958 | 0.01841   | -0.0872   | -0.0120   |
| +NA     | 6      | -0.06321 | 0.01841   | -0.1008   | -0.0256   |

Std Error uses a pooled estimate of error variance

### Means Comparisons

#### Comparisons with a control using Dunnett's Method

### Oneway Analysis of O-acetyl-L-serine By Label

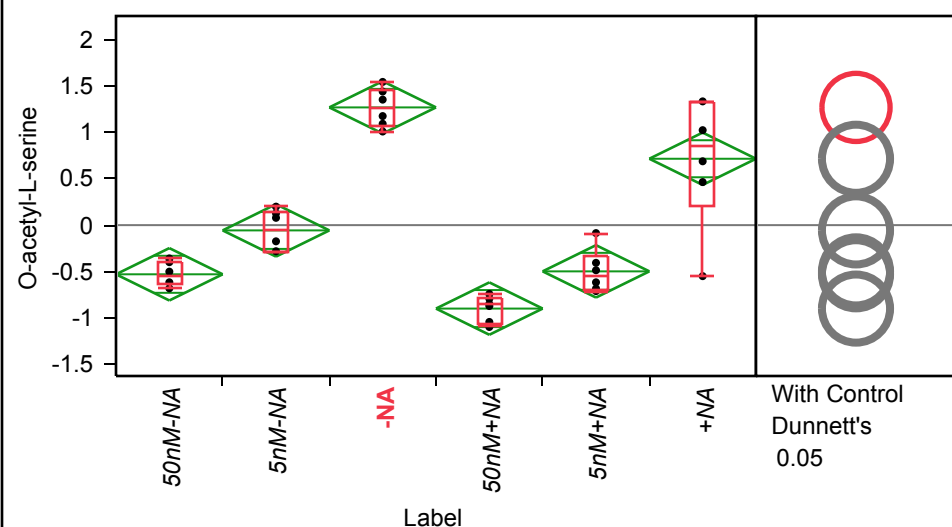

### Quantiles

| Level   | Minimum  | 10%      | 25%      | Median   | 75%      | 90%      | Maximum  |
|---------|----------|----------|----------|----------|----------|----------|----------|
| 50nM-NA | -0.68063 | -0.68063 | -0.63676 | -0.55844 | -0.38893 | -0.35904 | -0.35904 |
| 5nM-NA  | -0.2897  | -0.2897  | -0.28344 | -0.04786 | 0.145303 | 0.198979 | 0.198979 |
| -NA     | 1.008457 | 1.008457 | 1.070962 | 1.263285 | 1.465169 | 1.542661 | 1.542661 |
| 50nM+NA | -1.09704 | -1.09704 | -1.05649 | -0.85992 | -0.77944 | -0.74117 | -0.74117 |
| 5nM+NA  | -0.71041 | -0.71041 | -0.69016 | -0.55103 | -0.326   | -0.08594 | -0.08594 |
| +NA     | -0.54943 | -0.54943 | 0.210541 | 0.8553   | 1.332379 | 1.332959 | 1.332959 |

### Oneway Anova

#### Summary of Fit

|                            |          |
|----------------------------|----------|
| Rsquare                    | 0.858081 |
| Adj Rsquare                | 0.834428 |
| Root Mean Square Error     | 0.33826  |
| Mean of Response           | 2.78e-10 |
| Observations (or Sum Wgts) | 36       |

#### Analysis of Variance

| Source   | DF | Sum of Squares | Mean Square | F Ratio | Prob > F |
|----------|----|----------------|-------------|---------|----------|
| Label    | 5  | 20.754450      | 4.15089     | 36.2778 | <.0001 * |
| Error    | 30 | 3.432591       | 0.11442     |         |          |
| C. Total | 35 | 24.187041      |             |         |          |

#### Means for Oneway Anova

| Level   | Number | Mean    | Std Error | Lower 95% | Upper 95% |
|---------|--------|---------|-----------|-----------|-----------|
| 50nM-NA | 6      | -0.5296 | 0.13809   | -0.812    | -0.248    |
| 5nM-NA  | 6      | -0.0567 | 0.13809   | -0.339    | 0.225     |
| -NA     | 6      | 1.2681  | 0.13809   | 0.986     | 1.550     |
| 50nM+NA | 6      | -0.8989 | 0.13809   | -1.181    | -0.617    |
| 5nM+NA  | 6      | -0.4980 | 0.13809   | -0.780    | -0.216    |
| +NA     | 6      | 0.7150  | 0.13809   | 0.433     | 0.997     |

Std Error uses a pooled estimate of error variance

### Means Comparisons

#### Comparisons with a control using Dunnett's Method

### Oneway Analysis of octulose-phosphate By Label

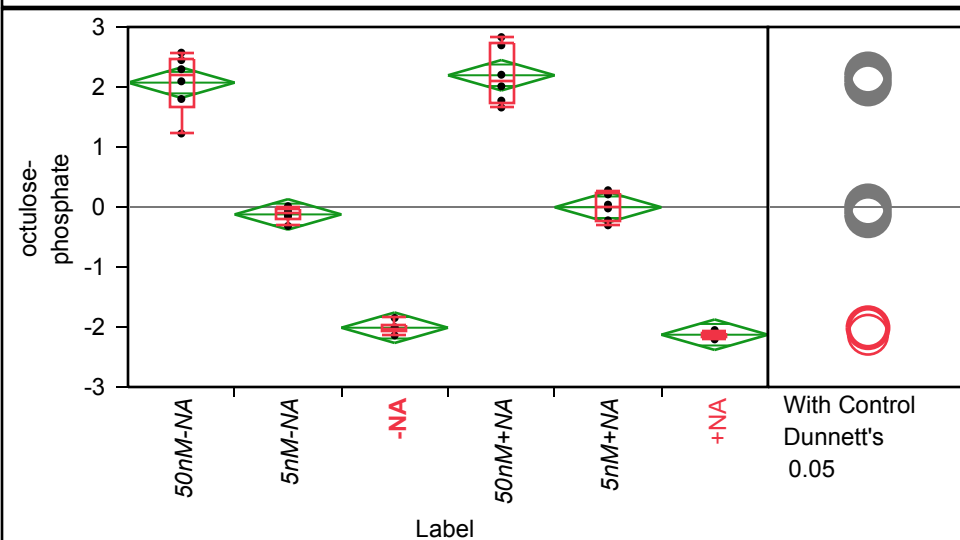

### Quantiles

| Level   | Minimum  | 10%      | 25%      | Median   | 75%      | 90%      | Maximum  |
|---------|----------|----------|----------|----------|----------|----------|----------|
| 50nM-NA | 1.224747 | 1.224747 | 1.656478 | 2.195423 | 2.479337 | 2.571939 | 2.571939 |
| 5nM-NA  | -0.31623 | -0.31623 | -0.19785 | -0.1054  | -0.0486  | 0.013375 | 0.013375 |
| -NA     | -2.14056 | -2.14056 | -2.07016 | -2.01719 | -1.96387 | -1.84932 | -1.84932 |
| 50nM+NA | 1.658176 | 1.658176 | 1.74415  | 2.108096 | 2.728821 | 2.831246 | 2.831246 |
| 5nM+NA  | -0.30502 | -0.30502 | -0.24323 | 0.007717 | 0.227063 | 0.279156 | 0.279156 |
| +NA     | -2.20626 | -2.20626 | -2.17492 | -2.12687 | -2.08469 | -2.05167 | -2.05167 |

### Oneway Anova

#### Summary of Fit

|                            |          |
|----------------------------|----------|
| Rsquare                    | 0.974546 |
| Adj Rsquare                | 0.970304 |
| Root Mean Square Error     | 0.304174 |
| Mean of Response           | -5.6e-10 |
| Observations (or Sum Wgts) | 36       |

#### Analysis of Variance

| Source   | DF | Sum of Squares | Mean Square | F Ratio  | Prob > F |
|----------|----|----------------|-------------|----------|----------|
| Label    | 5  | 106.27025      | 21.2540     | 229.7195 | <.0001 * |
| Error    | 30 | 2.77565        | 0.0925      |          |          |
| C. Total | 35 | 109.04590      |             |          |          |

#### Means for Oneway Anova

| Level   | Number | Mean    | Std Error | Lower 95% | Upper 95% |
|---------|--------|---------|-----------|-----------|-----------|
| 50nM-NA | 6      | 2.0727  | 0.12418   | 1.819     | 2.326     |
| 5nM-NA  | 6      | -0.1236 | 0.12418   | -0.377    | 0.130     |
| -NA     | 6      | -2.0122 | 0.12418   | -2.266    | -1.759    |
| 50nM+NA | 6      | 2.1955  | 0.12418   | 1.942     | 2.449     |
| 5nM+NA  | 6      | -0.0039 | 0.12418   | -0.257    | 0.250     |
| +NA     | 6      | -2.1286 | 0.12418   | -2.382    | -1.875    |

Std Error uses a pooled estimate of error variance

### Means Comparisons

#### Comparisons with a control using Dunnett's Method

### Oneway Analysis of ornithine By Label

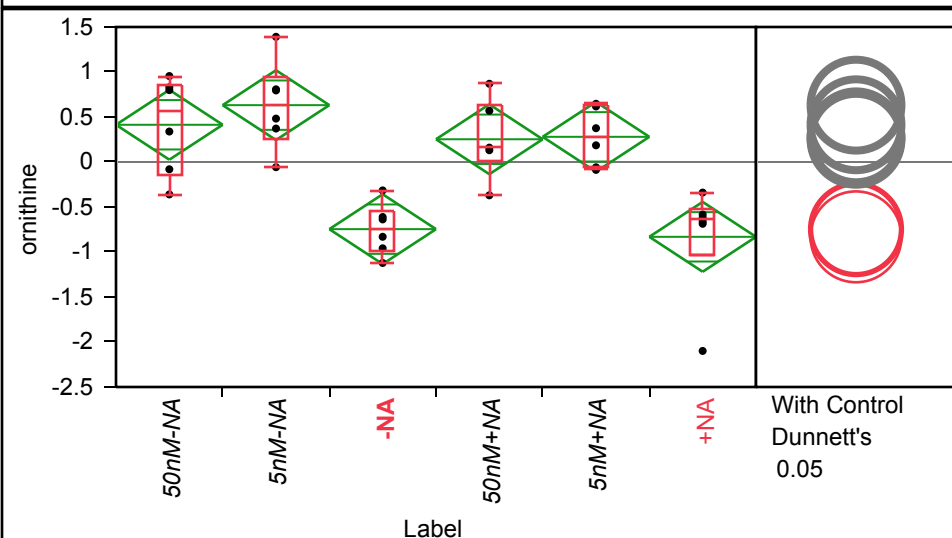

### Quantiles

| Level   | Minimum  | 10%      | 25%      | Median   | 75%      | 90%      | Maximum  |
|---------|----------|----------|----------|----------|----------|----------|----------|
| 50nM-NA | -0.36028 | -0.36028 | -0.15084 | 0.56858  | 0.86184  | 0.954999 | 0.954999 |
| 5nM-NA  | -0.05774 | -0.05774 | 0.264364 | 0.638646 | 0.953364 | 1.390956 | 1.390956 |
| -NA     | -1.12187 | -1.12187 | -0.99983 | -0.7344  | -0.53732 | -0.31567 | -0.31567 |
| 50nM+NA | -0.37021 | -0.37021 | 0.005487 | 0.158533 | 0.644164 | 0.869162 | 0.869162 |
| 5nM+NA  | -0.08753 | -0.08753 | -0.06607 | 0.280442 | 0.624445 | 0.646662 | 0.646662 |
| +NA     | -2.09943 | -2.09943 | -1.03962 | -0.63985 | -0.52254 | -0.3398  | -0.3398  |

### Oneway Anova

#### Summary of Fit

|                            |          |
|----------------------------|----------|
| Rsquare                    | 0.644171 |
| Adj Rsquare                | 0.584866 |
| Root Mean Square Error     | 0.465342 |
| Mean of Response           | -1.11e-9 |
| Observations (or Sum Wgts) | 36       |

#### Analysis of Variance

| Source   | DF | Sum of Squares | Mean Square | F Ratio | Prob > F |
|----------|----|----------------|-------------|---------|----------|
| Label    | 5  | 11.760472      | 2.35209     | 10.8620 | <.0001 * |
| Error    | 30 | 6.496289       | 0.21654     |         |          |
| C. Total | 35 | 18.256761      |             |         |          |

#### Means for Oneway Anova

| Level   | Number | Mean     | Std Error | Lower 95% | Upper 95% |
|---------|--------|----------|-----------|-----------|-----------|
| 50nM-NA | 6      | 0.41361  | 0.18997   | 0.026     | 0.802     |
| 5nM-NA  | 6      | 0.63162  | 0.18997   | 0.244     | 1.020     |
| -NA     | 6      | -0.74612 | 0.18997   | -1.134    | -0.358    |
| 50nM+NA | 6      | 0.25265  | 0.18997   | -0.135    | 0.641     |
| 5nM+NA  | 6      | 0.27969  | 0.18997   | -0.108    | 0.668     |
| +NA     | 6      | -0.83145 | 0.18997   | -1.219    | -0.443    |

Std Error uses a pooled estimate of error variance

### Means Comparisons

#### Comparisons with a control using Dunnett's Method

### Oneway Analysis of orotate By Label

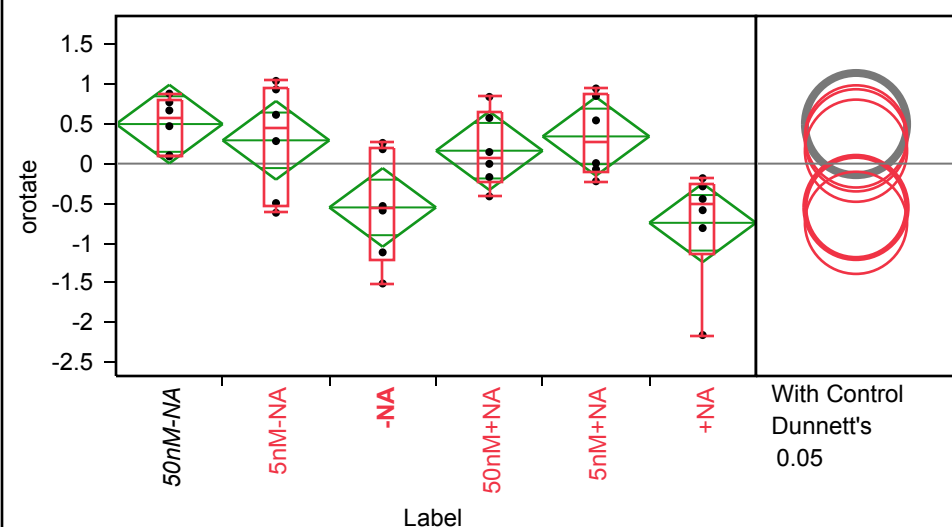

### Quantiles

| Level   | Minimum  | 10%      | 25%      | Median   | 75%      | 90%      | Maximum  |
|---------|----------|----------|----------|----------|----------|----------|----------|
| 50nM-NA | 0.090386 | 0.090386 | 0.10034  | 0.569662 | 0.797848 | 0.879819 | 0.879819 |
| 5nM-NA  | -0.6171  | -0.6171  | -0.5263  | 0.448569 | 0.95975  | 1.039757 | 1.039757 |
| -NA     | -1.50686 | -1.50686 | -1.21329 | -0.56146 | 0.200992 | 0.260315 | 0.260315 |
| 50nM+NA | -0.41159 | -0.41159 | -0.22978 | 0.071532 | 0.640088 | 0.838755 | 0.838755 |
| 5nM+NA  | -0.22167 | -0.22167 | -0.10832 | 0.274714 | 0.874039 | 0.944524 | 0.944524 |
| +NA     | -2.15493 | -2.15493 | -1.14631 | -0.51489 | -0.26033 | -0.18322 | -0.18322 |

### Oneway Anova

#### Summary of Fit

|                            |          |
|----------------------------|----------|
| Rsquare                    | 0.432125 |
| Adj Rsquare                | 0.337479 |
| Root Mean Square Error     | 0.59194  |
| Mean of Response           | 0        |
| Observations (or Sum Wgts) | 36       |

#### Analysis of Variance

| Source   | DF | Sum of Squares | Mean Square | F Ratio | Prob > F |
|----------|----|----------------|-------------|---------|----------|
| Label    | 5  | 7.998948       | 1.59979     | 4.5657  | 0.0033 * |
| Error    | 30 | 10.511794      | 0.35039     |         |          |
| C. Total | 35 | 18.510741      |             |         |          |

#### Means for Oneway Anova

| Level   | Number | Mean     | Std Error | Lower 95% | Upper 95% |
|---------|--------|----------|-----------|-----------|-----------|
| 50nM-NA | 6      | 0.49729  | 0.24166   | 0.00375   | 0.9908    |
| 5nM-NA  | 6      | 0.29281  | 0.24166   | -0.201    | 0.7863    |
| -NA     | 6      | -0.55061 | 0.24166   | -1.044    | -0.0571   |
| 50nM+NA | 6      | 0.16249  | 0.24166   | -0.331    | 0.6560    |
| 5nM+NA  | 6      | 0.34205  | 0.24166   | -0.151    | 0.8356    |
| +NA     | 6      | -0.74401 | 0.24166   | -1.238    | -0.2505   |

Std Error uses a pooled estimate of error variance

### Means Comparisons

#### Comparisons with a control using Dunnett's Method

### Oneway Analysis of Orotidine By Label

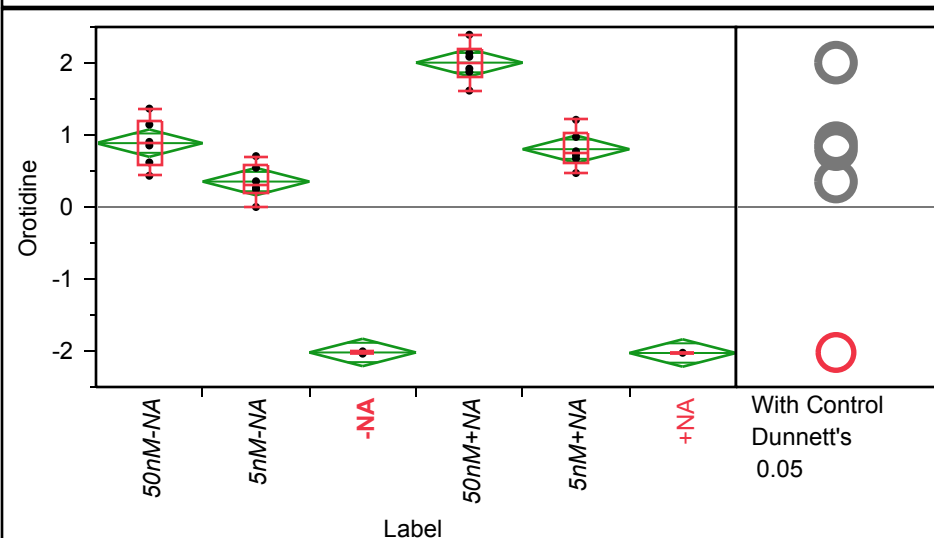

### Quantiles

| Level   | Minimum  | 10%      | 25%      | Median   | 75%      | 90%      | Maximum  |
|---------|----------|----------|----------|----------|----------|----------|----------|
| 50nM-NA | 0.433871 | 0.433871 | 0.572553 | 0.879427 | 1.199571 | 1.366525 | 1.366525 |
| 5nM-NA  | -0.00023 | -0.00023 | 0.18203  | 0.312903 | 0.584632 | 0.706531 | 0.706531 |
| -NA     | -2.03694 | -2.03694 | -2.02602 | -2.01964 | -2.01493 | -2.00528 | -2.00528 |
| 50nM+NA | 1.616391 | 1.616391 | 1.809963 | 2.00413  | 2.201423 | 2.392233 | 2.392233 |
| 5nM+NA  | 0.471583 | 0.471583 | 0.621258 | 0.746078 | 1.032284 | 1.210951 | 1.210951 |
| +NA     | -2.03404 | -2.03404 | -2.03048 | -2.02647 | -2.0253  | -2.02486 | -2.02486 |

### Oneway Anova

#### Summary of Fit

|                            |          |
|----------------------------|----------|
| Rsquare                    | 0.981464 |
| Adj Rsquare                | 0.978374 |
| Root Mean Square Error     | 0.228061 |
| Mean of Response           | 5.56e-11 |
| Observations (or Sum Wgts) | 36       |

#### Analysis of Variance

| Source   | DF | Sum of Squares | Mean Square | F Ratio  | Prob > F |
|----------|----|----------------|-------------|----------|----------|
| Label    | 5  | 82.616967      | 16.5234     | 317.6865 | <.0001 * |
| Error    | 30 | 1.560349       | 0.0520      |          |          |
| C. Total | 35 | 84.177316      |             |          |          |

#### Means for Oneway Anova

| Level   | Number | Mean    | Std Error | Lower 95% | Upper 95% |
|---------|--------|---------|-----------|-----------|-----------|
| 50nM-NA | 6      | 0.8870  | 0.09311   | 0.697     | 1.077     |
| 5nM-NA  | 6      | 0.3531  | 0.09311   | 0.163     | 0.543     |
| -NA     | 6      | -2.0203 | 0.09311   | -2.210    | -1.830    |
| 50nM+NA | 6      | 2.0049  | 0.09311   | 1.815     | 2.195     |
| 5nM+NA  | 6      | 0.8031  | 0.09311   | 0.613     | 0.993     |
| +NA     | 6      | -2.0278 | 0.09311   | -2.218    | -1.838    |

Std Error uses a pooled estimate of error variance

### Means Comparisons

#### Comparisons with a control using Dunnett's Method

### Oneway Analysis of Palmitic acid By Label

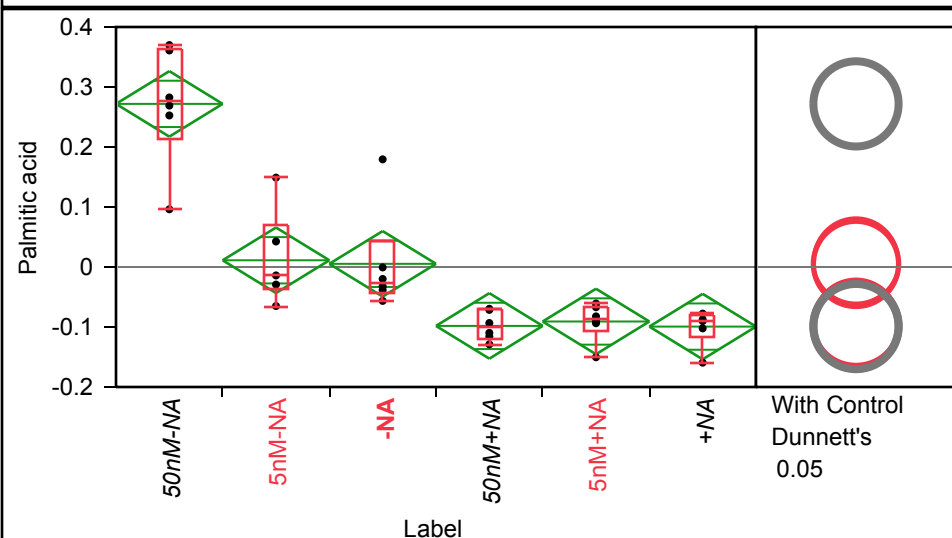

### Quantiles

| Level   | Minimum  | 10%      | 25%      | Median   | 75%      | 90%      | Maximum  |
|---------|----------|----------|----------|----------|----------|----------|----------|
| 50nM-NA | 0.09617  | 0.09617  | 0.213489 | 0.27577  | 0.363153 | 0.369836 | 0.369836 |
| 5nM-NA  | -0.0651  | -0.0651  | -0.03826 | -0.01489 | 0.069125 | 0.148924 | 0.148924 |
| -NA     | -0.05649 | -0.05649 | -0.04292 | -0.02606 | 0.044325 | 0.179439 | 0.179439 |
| 50nM+NA | -0.12895 | -0.12895 | -0.11916 | -0.10156 | -0.07103 | -0.06966 | -0.06966 |
| 5nM+NA  | -0.15042 | -0.15042 | -0.10789 | -0.08649 | -0.06548 | -0.06086 | -0.06086 |
| +NA     | -0.15943 | -0.15943 | -0.11656 | -0.08884 | -0.07854 | -0.07772 | -0.07772 |

### Oneway Anova

#### Summary of Fit

|                            |          |
|----------------------------|----------|
| Rsquare                    | 0.82612  |
| Adj Rsquare                | 0.79714  |
| Root Mean Square Error     | 0.065465 |
| Mean of Response           | -5.6e-11 |
| Observations (or Sum Wgts) | 36       |

#### Analysis of Variance

| Source   | DF | Sum of Squares | Mean Square | F Ratio | Prob > F |
|----------|----|----------------|-------------|---------|----------|
| Label    | 5  | 0.61085102     | 0.122170    | 28.5066 | <.0001 * |
| Error    | 30 | 0.12857062     | 0.004286    |         |          |
| C. Total | 35 | 0.73942164     |             |         |          |

#### Means for Oneway Anova

| Level   | Number | Mean     | Std Error | Lower 95% | Upper 95% |
|---------|--------|----------|-----------|-----------|-----------|
| 50nM-NA | 6      | 0.27184  | 0.02673   | 0.2173    | 0.3264    |
| 5nM-NA  | 6      | 0.01121  | 0.02673   | -0.0434   | 0.0658    |
| -NA     | 6      | 0.00529  | 0.02673   | -0.0493   | 0.0599    |
| 50nM+NA | 6      | -0.09819 | 0.02673   | -0.1528   | -0.0436   |
| 5nM+NA  | 6      | -0.09083 | 0.02673   | -0.1454   | -0.0363   |
| +NA     | 6      | -0.09932 | 0.02673   | -0.1539   | -0.0447   |

Std Error uses a pooled estimate of error variance

### Means Comparisons

#### Comparisons with a control using Dunnett's Method

### Oneway Analysis of pantothenate By Label

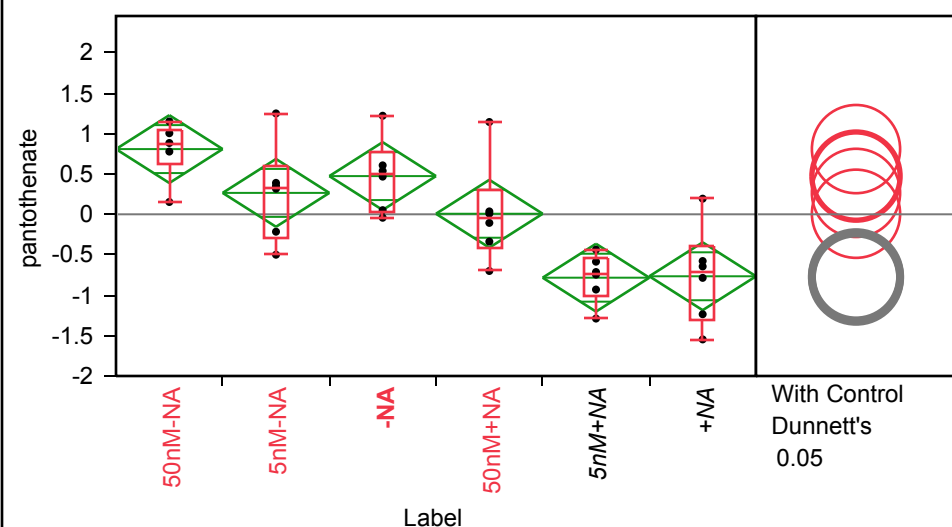

### Quantiles

| Level   | Minimum  | 10%      | 25%      | Median   | 75%      | 90%      | Maximum  |
|---------|----------|----------|----------|----------|----------|----------|----------|
| 50nM-NA | 0.152299 | 0.152299 | 0.619909 | 0.879822 | 1.039305 | 1.148697 | 1.148697 |
| 5nM-NA  | -0.49981 | -0.49981 | -0.28642 | 0.33363  | 0.60352  | 1.247651 | 1.247651 |
| -NA     | -0.0425  | -0.0425  | 0.02766  | 0.501327 | 0.758632 | 1.21896  | 1.21896  |
| 50nM+NA | -0.70109 | -0.70109 | -0.42834 | -0.04897 | 0.312197 | 1.141537 | 1.141537 |
| 5nM+NA  | -1.28966 | -1.28966 | -1.02051 | -0.73016 | -0.54891 | -0.43762 | -0.43762 |
| +NA     | -1.54738 | -1.54738 | -1.31402 | -0.7156  | -0.38524 | 0.193216 | 0.193216 |

### Oneway Anova

#### Summary of Fit

|                            |          |
|----------------------------|----------|
| Rsquare                    | 0.629207 |
| Adj Rsquare                | 0.567408 |
| Root Mean Square Error     | 0.50297  |
| Mean of Response           | -5.6e-11 |
| Observations (or Sum Wgts) | 36       |

#### Analysis of Variance

| Source   | DF | Sum of Squares | Mean Square | F Ratio | Prob > F |
|----------|----|----------------|-------------|---------|----------|
| Label    | 5  | 12.878557      | 2.57571     | 10.1815 | <.0001 * |
| Error    | 30 | 7.589370       | 0.25298     |         |          |
| C. Total | 35 | 20.467927      |             |         |          |

#### Means for Oneway Anova

| Level   | Number | Mean     | Std Error | Lower 95% | Upper 95% |
|---------|--------|----------|-----------|-----------|-----------|
| 50nM-NA | 6      | 0.80654  | 0.20534   | 0.387     | 1.226     |
| 5nM-NA  | 6      | 0.26477  | 0.20534   | -0.155    | 0.684     |
| -NA     | 6      | 0.47256  | 0.20534   | 0.053     | 0.892     |
| 50nM+NA | 6      | 0.00681  | 0.20534   | -0.413    | 0.426     |
| 5nM+NA  | 6      | -0.78407 | 0.20534   | -1.203    | -0.365    |
| +NA     | 6      | -0.76661 | 0.20534   | -1.186    | -0.347    |

Std Error uses a pooled estimate of error variance

### Means Comparisons

#### Comparisons with a control using Dunnett's Method

### Oneway Analysis of PC (13:0) By Label

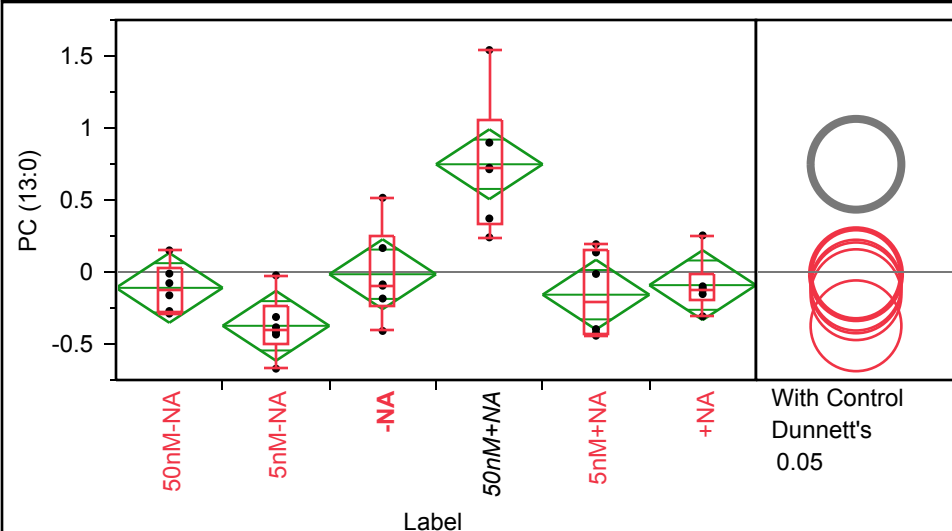

### Quantiles

| Level   | Minimum  | 10%      | 25%      | Median   | 75%      | 90%      | Maximum  |
|---------|----------|----------|----------|----------|----------|----------|----------|
| 50nM-NA | -0.28878 | -0.28878 | -0.27569 | -0.11952 | 0.029123 | 0.14999  | 0.14999  |
| 5nM-NA  | -0.67121 | -0.67121 | -0.49355 | -0.40013 | -0.2402  | -0.02343 | -0.02343 |
| -NA     | -0.40934 | -0.40934 | -0.24051 | -0.09074 | 0.253587 | 0.515477 | 0.515477 |
| 50nM+NA | 0.240384 | 0.240384 | 0.338829 | 0.718746 | 1.058802 | 1.541048 | 1.541048 |
| 5nM+NA  | -0.44239 | -0.44239 | -0.42724 | -0.20497 | 0.150193 | 0.192814 | 0.192814 |
| +NA     | -0.30814 | -0.30814 | -0.19196 | -0.12029 | -0.01121 | 0.253954 | 0.253954 |

### Oneway Anova

#### Summary of Fit

|                            |          |
|----------------------------|----------|
| Rsquare                    | 0.638318 |
| Adj Rsquare                | 0.578038 |
| Root Mean Square Error     | 0.290517 |
| Mean of Response           | 5.56e-10 |
| Observations (or Sum Wgts) | 36       |

#### Analysis of Variance

| Source   | DF | Sum of Squares | Mean Square | F Ratio | Prob > F |
|----------|----|----------------|-------------|---------|----------|
| Label    | 5  | 4.4686458      | 0.893729    | 10.5892 | <.0001 * |
| Error    | 30 | 2.5320083      | 0.084400    |         |          |
| C. Total | 35 | 7.0006542      |             |         |          |

#### Means for Oneway Anova

| Level   | Number | Mean     | Std Error | Lower 95% | Upper 95% |
|---------|--------|----------|-----------|-----------|-----------|
| 50nM-NA | 6      | -0.11005 | 0.11860   | -0.3523   | 0.1322    |
| 5nM-NA  | 6      | -0.37362 | 0.11860   | -0.6158   | -0.1314   |
| -NA     | 6      | -0.01555 | 0.11860   | -0.2578   | 0.2267    |
| 50nM+NA | 6      | 0.74810  | 0.11860   | 0.5059    | 0.9903    |
| 5nM+NA  | 6      | -0.15762 | 0.11860   | -0.3998   | 0.0846    |
| +NA     | 6      | -0.09127 | 0.11860   | -0.3335   | 0.1510    |

Std Error uses a pooled estimate of error variance

### Means Comparisons

#### Comparisons with a control using Dunnett's Method

### Oneway Analysis of PC (14:0) By Label

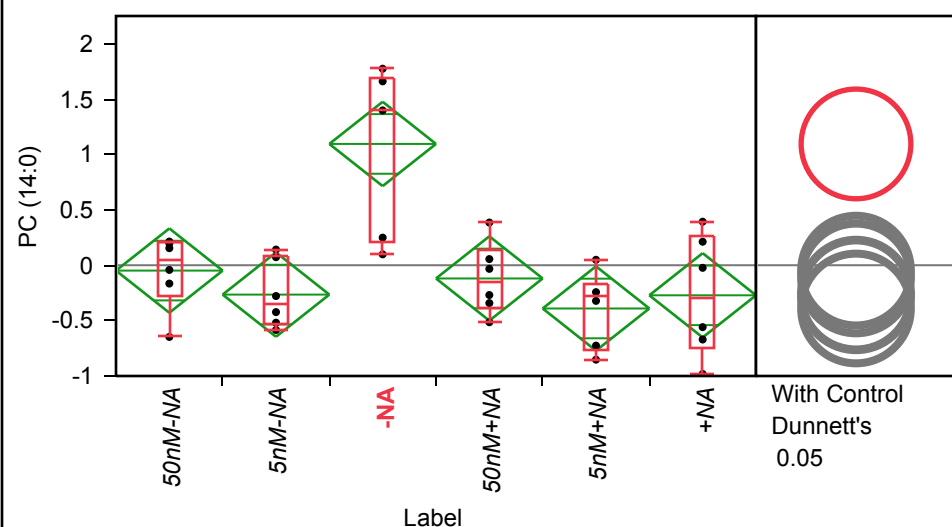

### Quantiles

| Level   | Minimum  | 10%      | 25%      | Median   | 75%      | 90%      | Maximum  |
|---------|----------|----------|----------|----------|----------|----------|----------|
| 50nM-NA | -0.6472  | -0.6472  | -0.28596 | 0.055845 | 0.200989 | 0.213768 | 0.213768 |
| 5nM-NA  | -0.58425 | -0.58425 | -0.53517 | -0.35071 | 0.089793 | 0.141167 | 0.141167 |
| -NA     | 0.098294 | 0.098294 | 0.211379 | 1.394311 | 1.688748 | 1.774035 | 1.774035 |
| 50nM+NA | -0.51453 | -0.51453 | -0.38509 | -0.15088 | 0.137973 | 0.385407 | 0.385407 |
| 5nM+NA  | -0.85234 | -0.85234 | -0.75739 | -0.28537 | -0.16998 | 0.048913 | 0.048913 |
| +NA     | -0.98147 | -0.98147 | -0.74826 | -0.29107 | 0.257371 | 0.393015 | 0.393015 |

### Oneway Anova

#### Summary of Fit

|                            |          |
|----------------------------|----------|
| Rsquare                    | 0.592104 |
| Adj Rsquare                | 0.524122 |
| Root Mean Square Error     | 0.45646  |
| Mean of Response           | -2.8e-10 |
| Observations (or Sum Wgts) | 36       |

#### Analysis of Variance

| Source   | DF | Sum of Squares | Mean Square | F Ratio | Prob > F |
|----------|----|----------------|-------------|---------|----------|
| Label    | 5  | 9.073509       | 1.81470     | 8.7096  | <.0001 * |
| Error    | 30 | 6.250663       | 0.20836     |         |          |
| C. Total | 35 | 15.324171      |             |         |          |

#### Means for Oneway Anova

| Level   | Number | Mean    | Std Error | Lower 95% | Upper 95% |
|---------|--------|---------|-----------|-----------|-----------|
| 50nM-NA | 6      | -0.0484 | 0.18635   | -0.4290   | 0.332     |
| 5nM-NA  | 6      | -0.2651 | 0.18635   | -0.6457   | 0.115     |
| -NA     | 6      | 1.0951  | 0.18635   | 0.7145    | 1.476     |
| 50nM+NA | 6      | -0.1196 | 0.18635   | -0.5001   | 0.261     |
| 5nM+NA  | 6      | -0.3905 | 0.18635   | -0.7711   | -0.0099   |
| +NA     | 6      | -0.2715 | 0.18635   | -0.6521   | 0.109     |

Std Error uses a pooled estimate of error variance

### Means Comparisons

#### Comparisons with a control using Dunnett's Method

### Oneway Analysis of PC (15:1) By Label

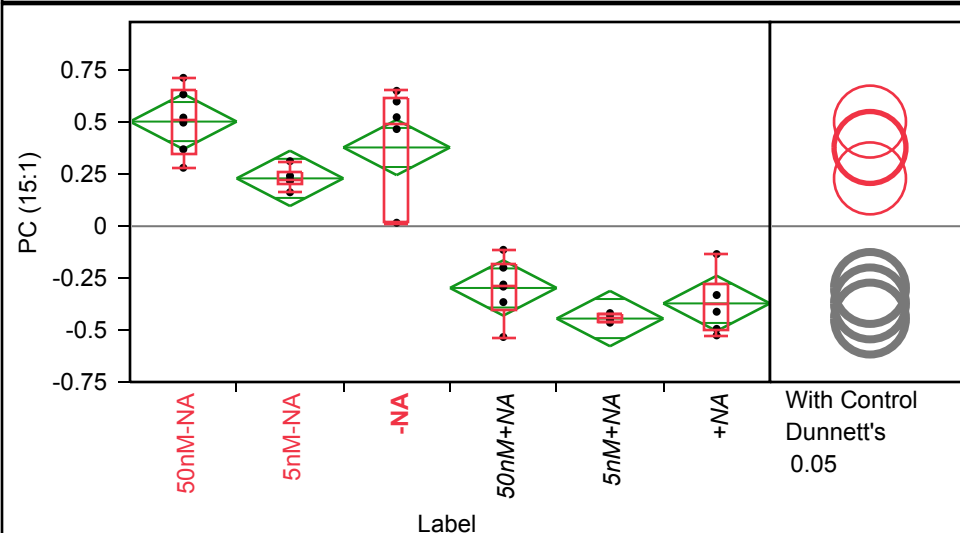

### Quantiles

| Level   | Minimum  | 10%      | 25%      | Median   | 75%      | 90%      | Maximum  |
|---------|----------|----------|----------|----------|----------|----------|----------|
| 50nM-NA | 0.281556 | 0.281556 | 0.348271 | 0.51097  | 0.654648 | 0.71442  | 0.71442  |
| 5nM-NA  | 0.163423 | 0.163423 | 0.203834 | 0.223143 | 0.259941 | 0.313095 | 0.313095 |
| -NA     | 0.013256 | 0.013256 | 0.015944 | 0.496435 | 0.613402 | 0.651854 | 0.651854 |
| 50nM+NA | -0.53335 | -0.53335 | -0.40737 | -0.28582 | -0.17807 | -0.11372 | -0.11372 |
| 5nM+NA  | -0.46572 | -0.46572 | -0.46475 | -0.44663 | -0.42398 | -0.41842 | -0.41842 |
| +NA     | -0.52553 | -0.52553 | -0.50209 | -0.37224 | -0.28195 | -0.13409 | -0.13409 |

### Oneway Anova

#### Summary of Fit

|                            |          |
|----------------------------|----------|
| Rsquare                    | 0.872917 |
| Adj Rsquare                | 0.851736 |
| Root Mean Square Error     | 0.159608 |
| Mean of Response           | 0        |
| Observations (or Sum Wgts) | 36       |

#### Analysis of Variance

| Source   | DF | Sum of Squares | Mean Square | F Ratio | Prob > F |
|----------|----|----------------|-------------|---------|----------|
| Label    | 5  | 5.2494317      | 1.04989     | 41.2131 | <.0001 * |
| Error    | 30 | 0.7642382      | 0.02547     |         |          |
| C. Total | 35 | 6.0136699      |             |         |          |

#### Means for Oneway Anova

| Level   | Number | Mean     | Std Error | Lower 95% | Upper 95% |
|---------|--------|----------|-----------|-----------|-----------|
| 50nM-NA | 6      | 0.50386  | 0.06516   | 0.3708    | 0.6369    |
| 5nM-NA  | 6      | 0.23039  | 0.06516   | 0.0973    | 0.3635    |
| -NA     | 6      | 0.37923  | 0.06516   | 0.2462    | 0.5123    |
| 50nM+NA | 6      | -0.29727 | 0.06516   | -0.4303   | -0.1642   |
| 5nM+NA  | 6      | -0.44461 | 0.06516   | -0.5777   | -0.3115   |
| +NA     | 6      | -0.37160 | 0.06516   | -0.5047   | -0.2385   |

Std Error uses a pooled estimate of error variance

### Means Comparisons

#### Comparisons with a control using Dunnett's Method

### Oneway Analysis of PC(15:0) By Label

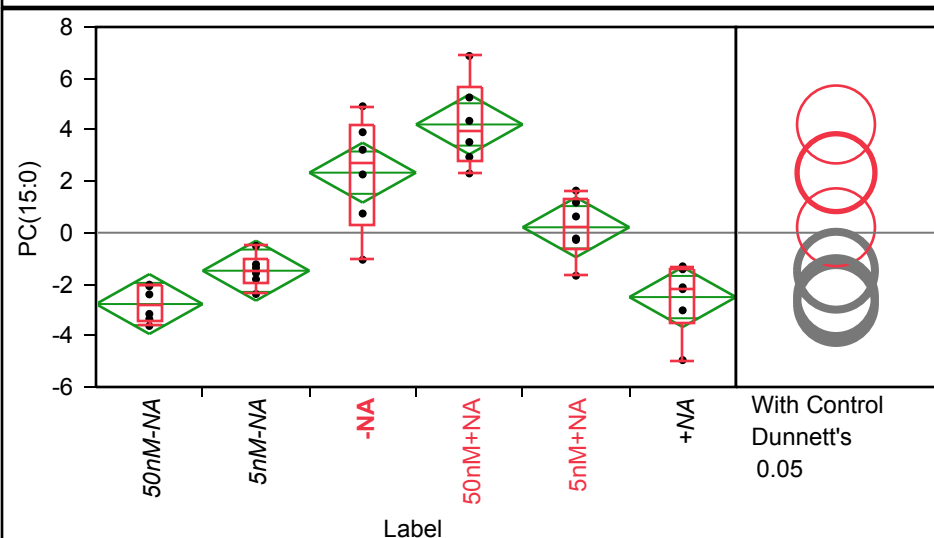

### Quantiles

| Level   | Minimum  | 10%      | 25%      | Median   | 75%      | 90%      | Maximum  |
|---------|----------|----------|----------|----------|----------|----------|----------|
| 50nM-NA | -3.62606 | -3.62606 | -3.42624 | -2.77871 | -2.06592 | -2.02123 | -2.02123 |
| 5nM-NA  | -2.38262 | -2.38262 | -1.95178 | -1.46651 | -1.0499  | -0.51418 | -0.51418 |
| -NA     | -1.05182 | -1.05182 | 0.296243 | 2.744888 | 4.160696 | 4.917106 | 4.917106 |
| 50nM+NA | 2.305569 | 2.305569 | 2.786148 | 3.937029 | 5.661365 | 6.873391 | 6.873391 |
| 5nM+NA  | -1.67103 | -1.67103 | -0.62736 | 0.202492 | 1.290179 | 1.637127 | 1.637127 |
| +NA     | -4.95535 | -4.95535 | -3.50298 | -2.15892 | -1.39274 | -1.3071  | -1.3071  |

### Oneway Anova

#### Summary of Fit

|                            |          |
|----------------------------|----------|
| Rsquare                    | 0.801707 |
| Adj Rsquare                | 0.768659 |
| Root Mean Square Error     | 1.395411 |
| Mean of Response           | -5.56e-9 |
| Observations (or Sum Wgts) | 36       |

#### Analysis of Variance

| Source   | DF | Sum of Squares | Mean Square | F Ratio | Prob > F |
|----------|----|----------------|-------------|---------|----------|
| Label    | 5  | 236.17538      | 47.2351     | 24.2583 | <.0001 * |
| Error    | 30 | 58.41512       | 1.9472      |         |          |
| C. Total | 35 | 294.59051      |             |         |          |

#### Means for Oneway Anova

| Level   | Number | Mean    | Std Error | Lower 95% | Upper 95% |
|---------|--------|---------|-----------|-----------|-----------|
| 50nM-NA | 6      | -2.7742 | 0.56967   | -3.938    | -1.611    |
| 5nM-NA  | 6      | -1.4777 | 0.56967   | -2.641    | -0.314    |
| -NA     | 6      | 2.3349  | 0.56967   | 1.171     | 3.498     |
| 50nM+NA | 6      | 4.2095  | 0.56967   | 3.046     | 5.373     |
| 5nM+NA  | 6      | 0.2110  | 0.56967   | -0.952    | 1.374     |
| +NA     | 6      | -2.5034 | 0.56967   | -3.667    | -1.340    |

Std Error uses a pooled estimate of error variance

### Means Comparisons

#### Comparisons with a control using Dunnett's Method

### Oneway Analysis of PC(16:1) By Label

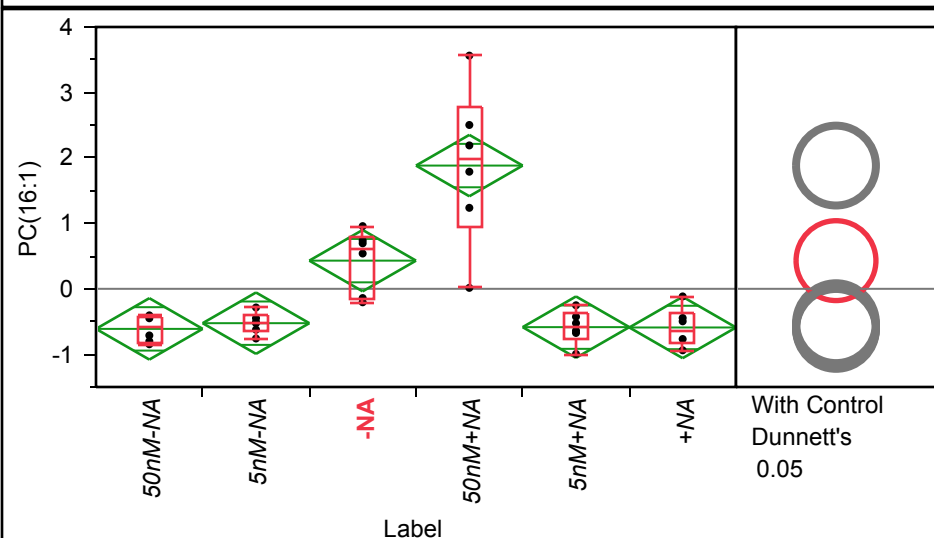

### Quantiles

| Level   | Minimum  | 10%      | 25%      | Median   | 75%      | 90%      | Maximum  |
|---------|----------|----------|----------|----------|----------|----------|----------|
| 50nM-NA | -0.84711 | -0.84711 | -0.81266 | -0.58453 | -0.43884 | -0.40586 | -0.40586 |
| 5nM-NA  | -0.75901 | -0.75901 | -0.65807 | -0.51666 | -0.40738 | -0.28535 | -0.28535 |
| -NA     | -0.20562 | -0.20562 | -0.15731 | 0.617295 | 0.792318 | 0.957695 | 0.957695 |
| 50nM+NA | 0.014647 | 0.014647 | 0.931618 | 1.989932 | 2.767945 | 3.562421 | 3.562421 |
| 5nM+NA  | -0.99598 | -0.99598 | -0.75492 | -0.58248 | -0.38223 | -0.25172 | -0.25172 |
| +NA     | -0.93923 | -0.93923 | -0.81968 | -0.63171 | -0.36286 | -0.11627 | -0.11627 |

### Oneway Anova

#### Summary of Fit

|                            |          |
|----------------------------|----------|
| Rsquare                    | 0.762354 |
| Adj Rsquare                | 0.722746 |
| Root Mean Square Error     | 0.562364 |
| Mean of Response           | -5.6e-10 |
| Observations (or Sum Wgts) | 36       |

#### Analysis of Variance

| Source   | DF | Sum of Squares | Mean Square | F Ratio | Prob > F |
|----------|----|----------------|-------------|---------|----------|
| Label    | 5  | 30.435656      | 6.08713     | 19.2477 | <.0001 * |
| Error    | 30 | 9.487596       | 0.31625     |         |          |
| C. Total | 35 | 39.923253      |             |         |          |

#### Means for Oneway Anova

| Level   | Number | Mean    | Std Error | Lower 95% | Upper 95% |
|---------|--------|---------|-----------|-----------|-----------|
| 50nM-NA | 6      | -0.6122 | 0.22958   | -1.081    | -0.143    |
| 5nM-NA  | 6      | -0.5250 | 0.22958   | -0.994    | -0.056    |
| -NA     | 6      | 0.4304  | 0.22958   | -0.038    | 0.899     |
| 50nM+NA | 6      | 1.8829  | 0.22958   | 1.414     | 2.352     |
| 5nM+NA  | 6      | -0.5855 | 0.22958   | -1.054    | -0.117    |
| +NA     | 6      | -0.5906 | 0.22958   | -1.060    | -0.122    |

Std Error uses a pooled estimate of error variance

### Means Comparisons

#### Comparisons with a control using Dunnett's Method

### Oneway Analysis of PC(17:1) By Label

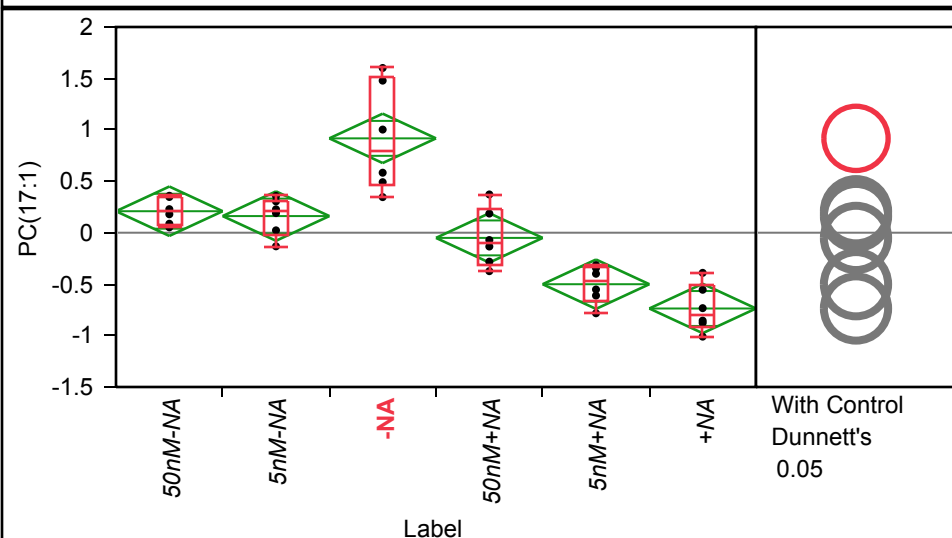

### Quantiles

| Level   | Minimum  | 10%      | 25%      | Median   | 75%      | 90%      | Maximum  |
|---------|----------|----------|----------|----------|----------|----------|----------|
| 50nM-NA | 0.052221 | 0.052221 | 0.078403 | 0.204219 | 0.350232 | 0.358904 | 0.358904 |
| 5nM-NA  | -0.13216 | -0.13216 | -0.01588 | 0.208972 | 0.317732 | 0.357187 | 0.357187 |
| -NA     | 0.346088 | 0.346088 | 0.454962 | 0.793062 | 1.509326 | 1.601554 | 1.601554 |
| 50nM+NA | -0.37383 | -0.37383 | -0.30457 | -0.10284 | 0.23266  | 0.371895 | 0.371895 |
| 5nM+NA  | -0.78313 | -0.78313 | -0.65419 | -0.47552 | -0.33683 | -0.3152  | -0.3152  |
| +NA     | -1.01028 | -1.01028 | -0.91036 | -0.79419 | -0.51354 | -0.39027 | -0.39027 |

### Oneway Anova

#### Summary of Fit

|                            |          |
|----------------------------|----------|
| Rsquare                    | 0.804653 |
| Adj Rsquare                | 0.772095 |
| Root Mean Square Error     | 0.287923 |
| Mean of Response           | 0        |
| Observations (or Sum Wgts) | 36       |

#### Analysis of Variance

| Source   | DF | Sum of Squares | Mean Square | F Ratio | Prob > F |
|----------|----|----------------|-------------|---------|----------|
| Label    | 5  | 10.244183      | 2.04884     | 24.7146 | <.0001 * |
| Error    | 30 | 2.486996       | 0.08290     |         |          |
| C. Total | 35 | 12.731179      |             |         |          |

#### Means for Oneway Anova

| Level   | Number | Mean     | Std Error | Lower 95% | Upper 95% |
|---------|--------|----------|-----------|-----------|-----------|
| 50nM-NA | 6      | 0.20901  | 0.11754   | -0.0311   | 0.449     |
| 5nM-NA  | 6      | 0.16174  | 0.11754   | -0.0783   | 0.402     |
| -NA     | 6      | 0.91727  | 0.11754   | 0.6772    | 1.157     |
| 50nM+NA | 6      | -0.05047 | 0.11754   | -0.2905   | 0.190     |
| 5nM+NA  | 6      | -0.50077 | 0.11754   | -0.7408   | -0.261    |
| +NA     | 6      | -0.73677 | 0.11754   | -0.9768   | -0.497    |

Std Error uses a pooled estimate of error variance

### Means Comparisons

#### Comparisons with a control using Dunnett's Method

### Oneway Analysis of PC(17:2) By Label

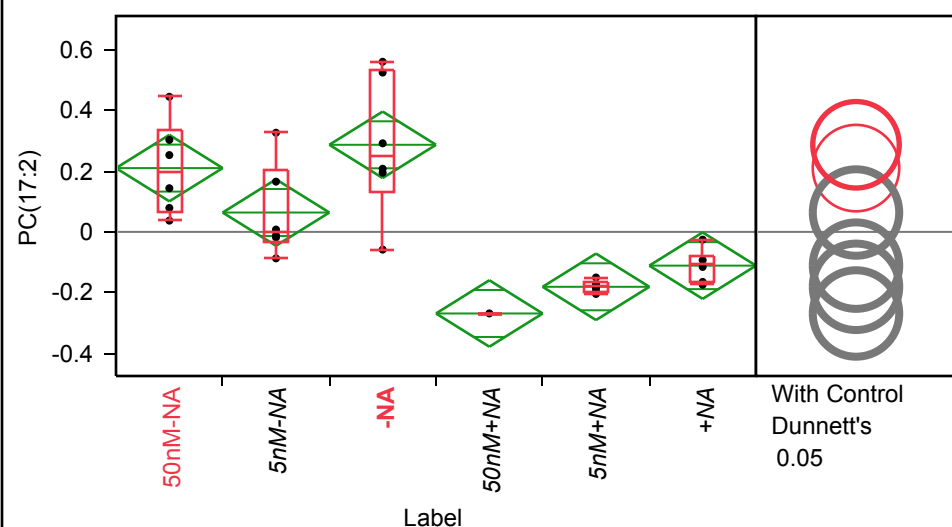

### Quantiles

| Level   | Minimum  | 10%      | 25%      | Median   | 75%      | 90%      | Maximum  |
|---------|----------|----------|----------|----------|----------|----------|----------|
| 50nM-NA | 0.037015 | 0.037015 | 0.068344 | 0.198104 | 0.337964 | 0.444397 | 0.444397 |
| 5nM-NA  | -0.08702 | -0.08702 | -0.03523 | -0.00212 | 0.205457 | 0.326074 | 0.326074 |
| -NA     | -0.05826 | -0.05826 | 0.131352 | 0.249463 | 0.532806 | 0.559442 | 0.559442 |
| 50nM+NA | -0.26856 | -0.26856 | -0.26845 | -0.26835 | -0.26816 | -0.26816 | -0.26816 |
| 5nM+NA  | -0.20412 | -0.20412 | -0.19775 | -0.1807  | -0.1669  | -0.15003 | -0.15003 |
| +NA     | -0.17369 | -0.17369 | -0.16686 | -0.1046  | -0.07611 | -0.02542 | -0.02542 |

### Oneway Anova

#### Summary of Fit

|                            |          |
|----------------------------|----------|
| Rsquare                    | 0.742067 |
| Adj Rsquare                | 0.699078 |
| Root Mean Square Error     | 0.131054 |
| Mean of Response           | -2.8e-11 |
| Observations (or Sum Wgts) | 36       |

#### Analysis of Variance

| Source   | DF | Sum of Squares | Mean Square | F Ratio | Prob > F |
|----------|----|----------------|-------------|---------|----------|
| Label    | 5  | 1.4823787      | 0.296476    | 17.2618 | <.0001 * |
| Error    | 30 | 0.5152568      | 0.017175    |         |          |
| C. Total | 35 | 1.9976356      |             |         |          |

#### Means for Oneway Anova

| Level   | Number | Mean     | Std Error | Lower 95% | Upper 95% |
|---------|--------|----------|-----------|-----------|-----------|
| 50nM-NA | 6      | 0.20982  | 0.05350   | 0.1005    | 0.3191    |
| 5nM-NA  | 6      | 0.06368  | 0.05350   | -0.0456   | 0.1730    |
| -NA     | 6      | 0.28643  | 0.05350   | 0.1772    | 0.3957    |
| 50nM+NA | 6      | -0.26833 | 0.05350   | -0.3776   | -0.1591   |
| 5nM+NA  | 6      | -0.18062 | 0.05350   | -0.2899   | -0.0714   |
| +NA     | 6      | -0.11098 | 0.05350   | -0.2203   | -0.0017   |

Std Error uses a pooled estimate of error variance

### Means Comparisons

#### Comparisons with a control using Dunnett's Method

### Oneway Analysis of p-coumaric acid By Label

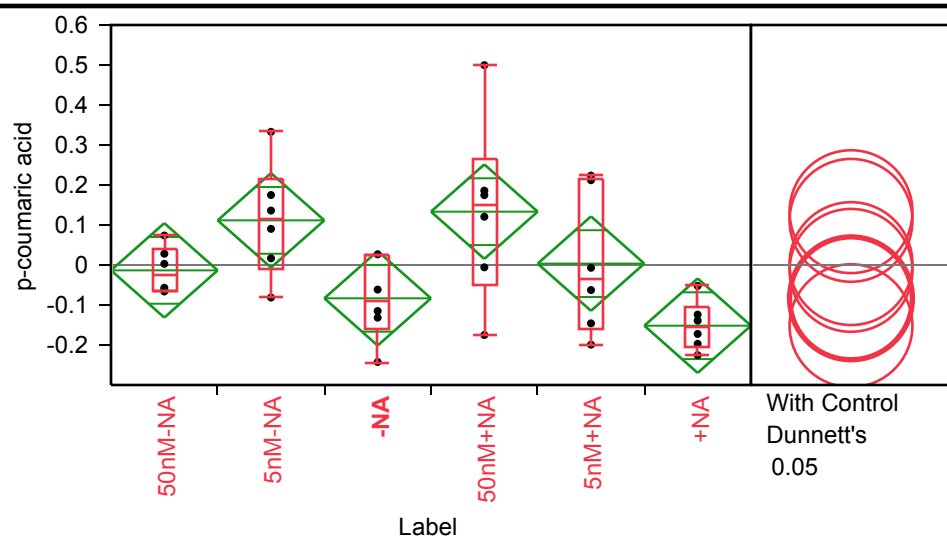

### Quantiles

| Level   | Minimum  | 10%      | 25%      | Median   | 75%      | 90%      | Maximum  |
|---------|----------|----------|----------|----------|----------|----------|----------|
| 50nM-NA | -0.06622 | -0.06622 | -0.06308 | -0.02701 | 0.039582 | 0.073696 | 0.073696 |
| 5nM-NA  | -0.08132 | -0.08132 | -0.00777 | 0.113216 | 0.214434 | 0.332856 | 0.332856 |
| -NA     | -0.24252 | -0.24252 | -0.15935 | -0.08831 | 0.02505  | 0.026568 | 0.026568 |
| 50nM+NA | -0.17491 | -0.17491 | -0.04811 | 0.14761  | 0.264325 | 0.499533 | 0.499533 |
| 5nM+NA  | -0.19917 | -0.19917 | -0.15921 | -0.0348  | 0.214857 | 0.223523 | 0.223523 |
| +NA     | -0.22545 | -0.22545 | -0.20426 | -0.15568 | -0.10612 | -0.05235 | -0.05235 |

### Oneway Anova

#### Summary of Fit

|                            |          |
|----------------------------|----------|
| Rsquare                    | 0.375969 |
| Adj Rsquare                | 0.271963 |
| Root Mean Square Error     | 0.141578 |
| Mean of Response           | -2.8e-11 |
| Observations (or Sum Wgts) | 36       |

#### Analysis of Variance

| Source   | DF | Sum of Squares | Mean Square | F Ratio | Prob > F |
|----------|----|----------------|-------------|---------|----------|
| Label    | 5  | 0.36229182     | 0.072458    | 3.6149  | 0.0112 * |
| Error    | 30 | 0.60133086     | 0.020044    |         |          |
| C. Total | 35 | 0.96362267     |             |         |          |

#### Means for Oneway Anova

| Level   | Number | Mean     | Std Error | Lower 95% | Upper 95% |
|---------|--------|----------|-----------|-----------|-----------|
| 50nM-NA | 6      | -0.01339 | 0.05780   | -0.1314   | 0.1046    |
| 5nM-NA  | 6      | 0.11161  | 0.05780   | -0.0064   | 0.2297    |
| -NA     | 6      | -0.08328 | 0.05780   | -0.2013   | 0.0348    |
| 50nM+NA | 6      | 0.13332  | 0.05780   | 0.0153    | 0.2514    |
| 5nM+NA  | 6      | 0.00347  | 0.05780   | -0.1146   | 0.1215    |
| +NA     | 6      | -0.15173 | 0.05780   | -0.2698   | -0.0337   |

Std Error uses a pooled estimate of error variance

### Means Comparisons

#### Comparisons with a control using Dunnett's Method

### Oneway Analysis of Pentadecanal By Label

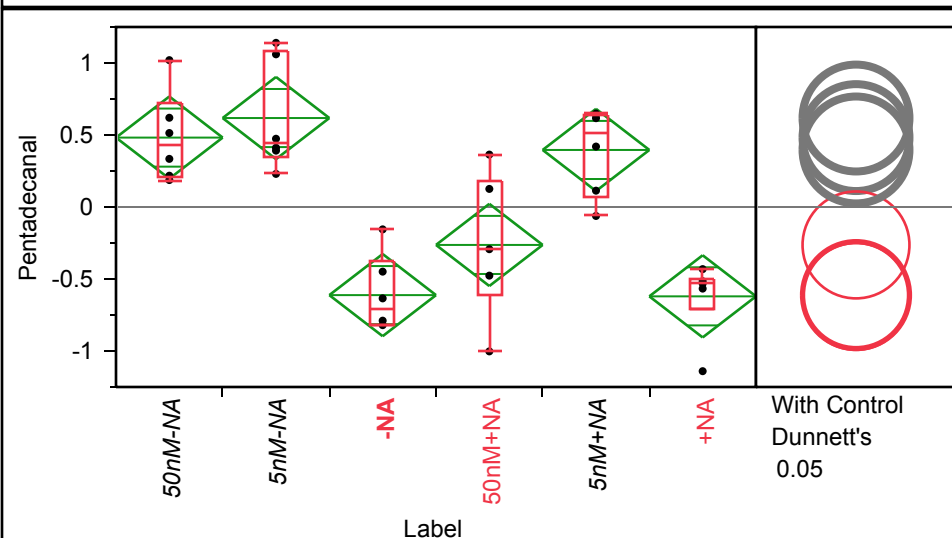

### Quantiles

| Level   | Minimum  | 10%      | 25%      | Median   | 75%      | 90%      | Maximum  |
|---------|----------|----------|----------|----------|----------|----------|----------|
| 50nM-NA | 0.187142 | 0.187142 | 0.209815 | 0.423916 | 0.719713 | 1.019773 | 1.019773 |
| 5nM-NA  | 0.229972 | 0.229972 | 0.350967 | 0.442608 | 1.080268 | 1.139939 | 1.139939 |
| -NA     | -0.82261 | -0.82261 | -0.82108 | -0.712   | -0.3755  | -0.15536 | -0.15536 |
| 50nM+NA | -1.00263 | -1.00263 | -0.60816 | -0.29545 | 0.185156 | 0.363859 | 0.363859 |
| 5nM+NA  | -0.06227 | -0.06227 | 0.06943  | 0.518273 | 0.64246  | 0.648473 | 0.648473 |
| +NA     | -1.14017 | -1.14017 | -0.71002 | -0.53457 | -0.49457 | -0.43143 | -0.43143 |

### Oneway Anova

#### Summary of Fit

|                            |          |
|----------------------------|----------|
| Rsquare                    | 0.732089 |
| Adj Rsquare                | 0.687437 |
| Root Mean Square Error     | 0.342176 |
| Mean of Response           | 5.56e-10 |
| Observations (or Sum Wgts) | 36       |

#### Analysis of Variance

| Source   | DF | Sum of Squares | Mean Square | F Ratio | Prob > F |
|----------|----|----------------|-------------|---------|----------|
| Label    | 5  | 9.598275       | 1.91965     | 16.3955 | <.0001 * |
| Error    | 30 | 3.512529       | 0.11708     |         |          |
| C. Total | 35 | 13.110804      |             |         |          |

#### Means for Oneway Anova

| Level   | Number | Mean     | Std Error | Lower 95% | Upper 95% |
|---------|--------|----------|-----------|-----------|-----------|
| 50nM-NA | 6      | 0.48197  | 0.13969   | 0.1967    | 0.7673    |
| 5nM-NA  | 6      | 0.61780  | 0.13969   | 0.3325    | 0.9031    |
| -NA     | 6      | -0.61190 | 0.13969   | -0.8972   | -0.3266   |
| 50nM+NA | 6      | -0.26346 | 0.13969   | -0.5487   | 0.0218    |
| 5nM+NA  | 6      | 0.39609  | 0.13969   | 0.1108    | 0.6814    |
| +NA     | 6      | -0.62050 | 0.13969   | -0.9058   | -0.3352   |

Std Error uses a pooled estimate of error variance

### Means Comparisons

#### Comparisons with a control using Dunnett's Method

### Oneway Analysis of phenylalanine By Label

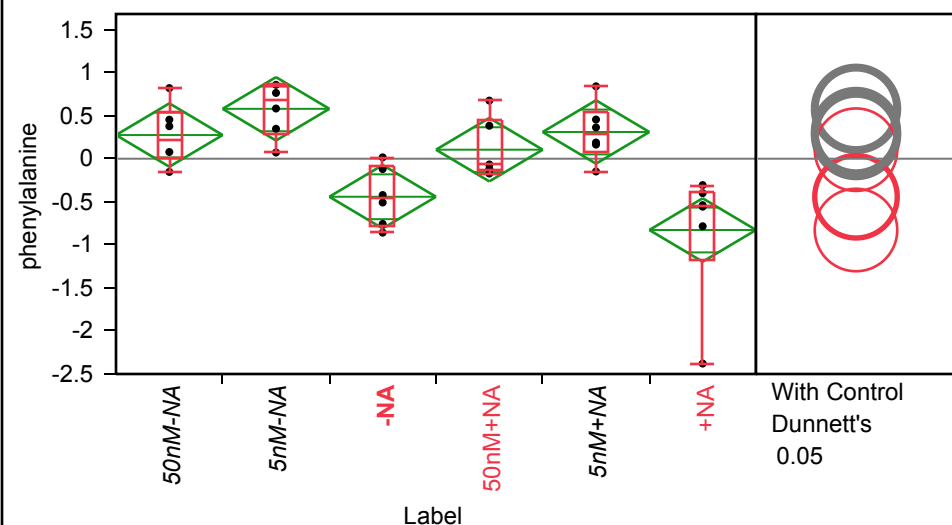

### Quantiles

| Level   | Minimum  | 10%      | 25%      | Median   | 75%      | 90%      | Maximum  |
|---------|----------|----------|----------|----------|----------|----------|----------|
| 50nM-NA | -0.15326 | -0.15326 | 0.017205 | 0.227536 | 0.5451   | 0.819849 | 0.819849 |
| 5nM-NA  | 0.072142 | 0.072142 | 0.278425 | 0.67346  | 0.853108 | 0.85819  | 0.85819  |
| -NA     | -0.85816 | -0.85816 | -0.7826  | -0.46515 | -0.08611 | 0.016003 | 0.016003 |
| 50nM+NA | -0.17207 | -0.17207 | -0.13245 | -0.06879 | 0.455893 | 0.674616 | 0.674616 |
| 5nM+NA  | -0.14823 | -0.14823 | 0.085781 | 0.275682 | 0.551398 | 0.8406   | 0.8406   |
| +NA     | -2.37867 | -2.37867 | -1.1831  | -0.54831 | -0.3765  | -0.30661 | -0.30661 |

### Oneway Anova

#### Summary of Fit

|                            |          |
|----------------------------|----------|
| Rsquare                    | 0.589293 |
| Adj Rsquare                | 0.520841 |
| Root Mean Square Error     | 0.441543 |
| Mean of Response           | -2.8e-10 |
| Observations (or Sum Wgts) | 36       |

#### Analysis of Variance

| Source   | DF | Sum of Squares | Mean Square | F Ratio | Prob > F |
|----------|----|----------------|-------------|---------|----------|
| Label    | 5  | 8.391999       | 1.67840     | 8.6089  | <.0001 * |
| Error    | 30 | 5.848800       | 0.19496     |         |          |
| C. Total | 35 | 14.240799      |             |         |          |

#### Means for Oneway Anova

| Level   | Number | Mean     | Std Error | Lower 95% | Upper 95% |
|---------|--------|----------|-----------|-----------|-----------|
| 50nM-NA | 6      | 0.27487  | 0.18026   | -0.093    | 0.6430    |
| 5nM-NA  | 6      | 0.57931  | 0.18026   | 0.211     | 0.9474    |
| -NA     | 6      | -0.44167 | 0.18026   | -0.810    | -0.0735   |
| 50nM+NA | 6      | 0.10478  | 0.18026   | -0.263    | 0.4729    |
| 5nM+NA  | 6      | 0.31042  | 0.18026   | -0.058    | 0.6786    |
| +NA     | 6      | -0.82771 | 0.18026   | -1.196    | -0.4596   |

Std Error uses a pooled estimate of error variance

### Means Comparisons

#### Comparisons with a control using Dunnett's Method

### Oneway Analysis of Phenyllactic acid By Label

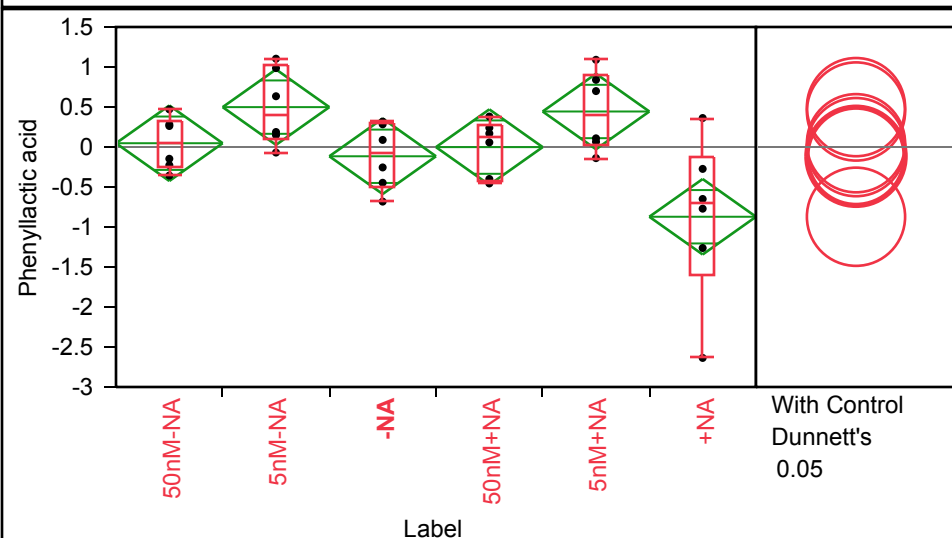

### Quantiles

| Level   | Minimum  | 10%      | 25%      | Median   | 75%      | 90%      | Maximum  |
|---------|----------|----------|----------|----------|----------|----------|----------|
| 50nM-NA | -0.35702 | -0.35702 | -0.25939 | 0.057623 | 0.328391 | 0.470482 | 0.470482 |
| 5nM-NA  | -0.06938 | -0.06938 | 0.093769 | 0.410891 | 1.01563  | 1.103634 | 1.103634 |
| -NA     | -0.68255 | -0.68255 | -0.50613 | -0.08357 | 0.292036 | 0.317403 | 0.317403 |
| 50nM+NA | -0.45563 | -0.45563 | -0.41374 | 0.113248 | 0.27458  | 0.380871 | 0.380871 |
| 5nM+NA  | -0.13917 | -0.13917 | 0.014328 | 0.403603 | 0.902166 | 1.089904 | 1.089904 |
| +NA     | -2.63667 | -2.63667 | -1.60616 | -0.71026 | -0.11475 | 0.362072 | 0.362072 |

### Oneway Anova

#### Summary of Fit

|                            |          |
|----------------------------|----------|
| Rsquare                    | 0.432784 |
| Adj Rsquare                | 0.338248 |
| Root Mean Square Error     | 0.565807 |
| Mean of Response           | 0        |
| Observations (or Sum Wgts) | 36       |

#### Analysis of Variance

| Source   | DF | Sum of Squares | Mean Square | F Ratio | Prob > F |
|----------|----|----------------|-------------|---------|----------|
| Label    | 5  | 7.327931       | 1.46559     | 4.5780  | 0.0032 * |
| Error    | 30 | 9.604135       | 0.32014     |         |          |
| C. Total | 35 | 16.932066      |             |         |          |

#### Means for Oneway Anova

| Level   | Number | Mean     | Std Error | Lower 95% | Upper 95% |
|---------|--------|----------|-----------|-----------|-----------|
| 50nM-NA | 6      | 0.04715  | 0.23099   | -0.425    | 0.5189    |
| 5nM-NA  | 6      | 0.49841  | 0.23099   | 0.027     | 0.9702    |
| -NA     | 6      | -0.11600 | 0.23099   | -0.588    | 0.3557    |
| 50nM+NA | 6      | -0.00148 | 0.23099   | -0.473    | 0.4703    |
| 5nM+NA  | 6      | 0.44384  | 0.23099   | -0.028    | 0.9156    |
| +NA     | 6      | -0.87191 | 0.23099   | -1.344    | -0.4002   |

Std Error uses a pooled estimate of error variance

### Means Comparisons

#### Comparisons with a control using Dunnett's Method

### Oneway Analysis of Phosphate By Label

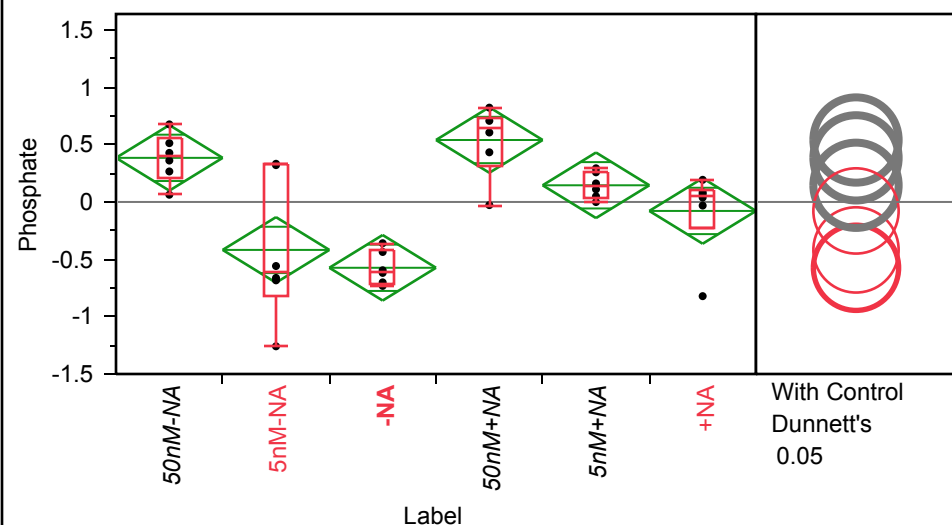

### Quantiles

| Level   | Minimum  | 10%      | 25%      | Median   | 75%      | 90%      | Maximum  |
|---------|----------|----------|----------|----------|----------|----------|----------|
| 50nM-NA | 0.063032 | 0.063032 | 0.215231 | 0.39455  | 0.553783 | 0.676341 | 0.676341 |
| 5nM-NA  | -1.25844 | -1.25844 | -0.82716 | -0.61039 | 0.324118 | 0.332706 | 0.332706 |
| -NA     | -0.73178 | -0.73178 | -0.70888 | -0.60707 | -0.41698 | -0.35981 | -0.35981 |
| 50nM+NA | -0.02733 | -0.02733 | 0.317877 | 0.653252 | 0.735967 | 0.822233 | 0.822233 |
| 5nM+NA  | -0.0007  | -0.0007  | 0.036754 | 0.135788 | 0.267471 | 0.293476 | 0.293476 |
| +NA     | -0.82129 | -0.82129 | -0.22897 | 0.052859 | 0.111608 | 0.192947 | 0.192947 |

### Oneway Anova

#### Summary of Fit

|                            |          |
|----------------------------|----------|
| Rsquare                    | 0.623185 |
| Adj Rsquare                | 0.560382 |
| Root Mean Square Error     | 0.342698 |
| Mean of Response           | -2.8e-11 |
| Observations (or Sum Wgts) | 36       |

#### Analysis of Variance

| Source   | DF | Sum of Squares | Mean Square | F Ratio | Prob > F |
|----------|----|----------------|-------------|---------|----------|
| Label    | 5  | 5.8268306      | 1.16537     | 9.9229  | <.0001 * |
| Error    | 30 | 3.5232564      | 0.11744     |         |          |
| C. Total | 35 | 9.3500870      |             |         |          |

#### Means for Oneway Anova

| Level   | Number | Mean     | Std Error | Lower 95% | Upper 95% |
|---------|--------|----------|-----------|-----------|-----------|
| 50nM-NA | 6      | 0.38456  | 0.13991   | 0.0988    | 0.6703    |
| 5nM-NA  | 6      | -0.41811 | 0.13991   | -0.7038   | -0.1324   |
| -NA     | 6      | -0.57383 | 0.13991   | -0.8596   | -0.2881   |
| 50nM+NA | 6      | 0.54026  | 0.13991   | 0.2545    | 0.8260    |
| 5nM+NA  | 6      | 0.14540  | 0.13991   | -0.1403   | 0.4311    |
| +NA     | 6      | -0.07828 | 0.13991   | -0.3640   | 0.2074    |

Std Error uses a pooled estimate of error variance

### Means Comparisons

#### Comparisons with a control using Dunnett's Method

### Oneway Analysis of Phosphatidylglycerol By Label

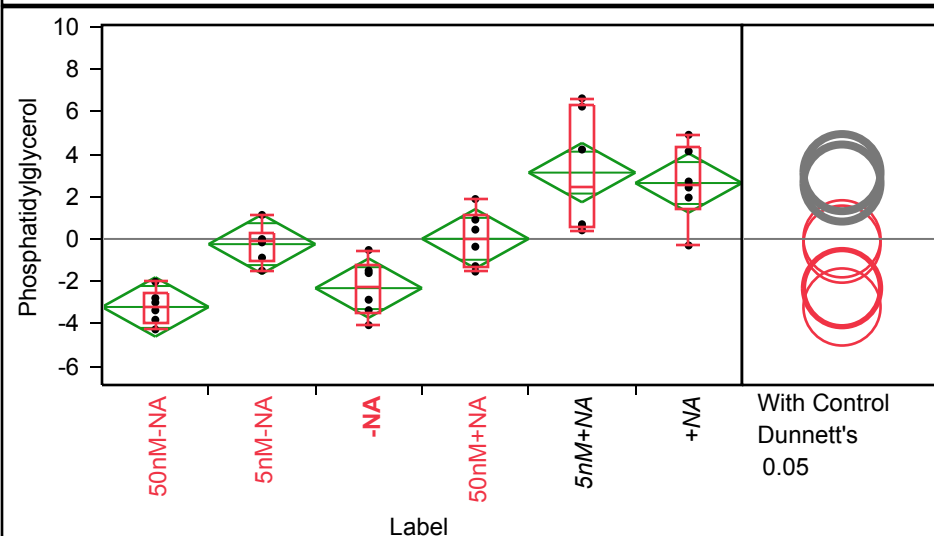

### Quantiles

| Level   | Minimum  | 10%      | 25%      | Median   | 75%      | 90%      | Maximum  |
|---------|----------|----------|----------|----------|----------|----------|----------|
| 50nM-NA | -4.27087 | -4.27087 | -3.92838 | -3.18478 | -2.59754 | -2.0217  | -2.0217  |
| 5nM-NA  | -1.49746 | -1.49746 | -1.03631 | -0.10915 | 0.278613 | 1.133416 | 1.133416 |
| -NA     | -4.07039 | -4.07039 | -3.53933 | -2.24071 | -1.25149 | -0.52408 | -0.52408 |
| 50nM+NA | -1.54221 | -1.54221 | -1.34882 | 0.037544 | 1.153647 | 1.883733 | 1.883733 |
| 5nM+NA  | 0.408172 | 0.408172 | 0.537758 | 2.457097 | 6.345582 | 6.636919 | 6.636919 |
| +NA     | -0.30793 | -0.30793 | 1.387477 | 2.569655 | 4.332758 | 4.915485 | 4.915485 |

### Oneway Anova

#### Summary of Fit

|                            |          |
|----------------------------|----------|
| Rsquare                    | 0.698131 |
| Adj Rsquare                | 0.64782  |
| Root Mean Square Error     | 1.677407 |
| Mean of Response           | 0        |
| Observations (or Sum Wgts) | 36       |

#### Analysis of Variance

| Source   | DF | Sum of Squares | Mean Square | F Ratio | Prob > F |
|----------|----|----------------|-------------|---------|----------|
| Label    | 5  | 195.21684      | 39.0434     | 13.8762 | <.0001 * |
| Error    | 30 | 84.41081       | 2.8137      |         |          |
| C. Total | 35 | 279.62765      |             |         |          |

#### Means for Oneway Anova

| Level   | Number | Mean    | Std Error | Lower 95% | Upper 95% |
|---------|--------|---------|-----------|-----------|-----------|
| 50nM-NA | 6      | -3.2110 | 0.68480   | -4.610    | -1.812    |
| 5nM-NA  | 6      | -0.2452 | 0.68480   | -1.644    | 1.153     |
| -NA     | 6      | -2.3220 | 0.68480   | -3.721    | -0.923    |
| 50nM+NA | 6      | 0.0071  | 0.68480   | -1.391    | 1.406     |
| 5nM+NA  | 6      | 3.1315  | 0.68480   | 1.733     | 4.530     |
| +NA     | 6      | 2.6397  | 0.68480   | 1.241     | 4.038     |

Std Error uses a pooled estimate of error variance

### Means Comparisons

#### Comparisons with a control using Dunnett's Method

### Oneway Analysis of phosphoenolpyruvate By Label

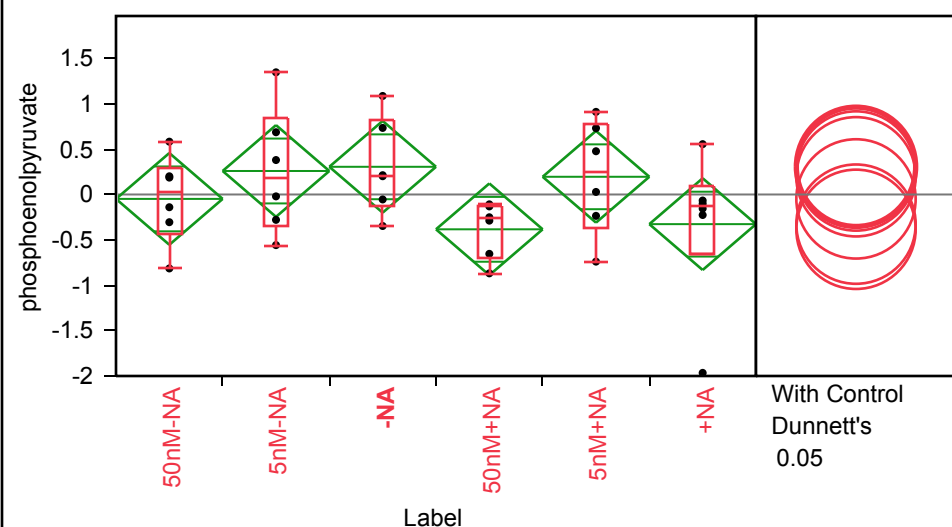

### Quantiles

| Level   | Minimum  | 10%      | 25%      | Median   | 75%      | 90%      | Maximum  |
|---------|----------|----------|----------|----------|----------|----------|----------|
| 50nM-NA | -0.81492 | -0.81492 | -0.43275 | 0.02288  | 0.295897 | 0.581953 | 0.581953 |
| 5nM-NA  | -0.55785 | -0.55785 | -0.34906 | 0.179394 | 0.85093  | 1.346075 | 1.346075 |
| -NA     | -0.34727 | -0.34727 | -0.12789 | 0.206828 | 0.821441 | 1.085366 | 1.085366 |
| 50nM+NA | -0.86885 | -0.86885 | -0.70778 | -0.2696  | -0.12566 | -0.10873 | -0.10873 |
| 5nM+NA  | -0.73966 | -0.73966 | -0.3615  | 0.25224  | 0.775799 | 0.910218 | 0.910218 |
| +NA     | -1.96556 | -1.96556 | -0.66093 | -0.12822 | 0.088565 | 0.554521 | 0.554521 |

### Oneway Anova

#### Summary of Fit

|                            |          |
|----------------------------|----------|
| Rsquare                    | 0.198416 |
| Adj Rsquare                | 0.064818 |
| Root Mean Square Error     | 0.605993 |
| Mean of Response           | -5.6e-10 |
| Observations (or Sum Wgts) | 36       |

#### Analysis of Variance

| Source   | DF | Sum of Squares | Mean Square | F Ratio | Prob > F |
|----------|----|----------------|-------------|---------|----------|
| Label    | 5  | 2.726983       | 0.545397    | 1.4852  | 0.2241   |
| Error    | 30 | 11.016815      | 0.367227    |         |          |
| C. Total | 35 | 13.743798      |             |         |          |

#### Means for Oneway Anova

| Level   | Number | Mean     | Std Error | Lower 95% | Upper 95% |
|---------|--------|----------|-----------|-----------|-----------|
| 50nM-NA | 6      | -0.04867 | 0.24740   | -0.5539   | 0.45658   |
| 5nM-NA  | 6      | 0.25890  | 0.24740   | -0.2463   | 0.76415   |
| -NA     | 6      | 0.30508  | 0.24740   | -0.2002   | 0.81032   |
| 50nM+NA | 6      | -0.38369 | 0.24740   | -0.8889   | 0.12155   |
| 5nM+NA  | 6      | 0.19510  | 0.24740   | -0.3102   | 0.70035   |
| +NA     | 6      | -0.32671 | 0.24740   | -0.8320   | 0.17854   |

Std Error uses a pooled estimate of error variance

### Means Comparisons

#### Comparisons with a control using Dunnett's Method

### Oneway Analysis of Phosphorylcholine By Label

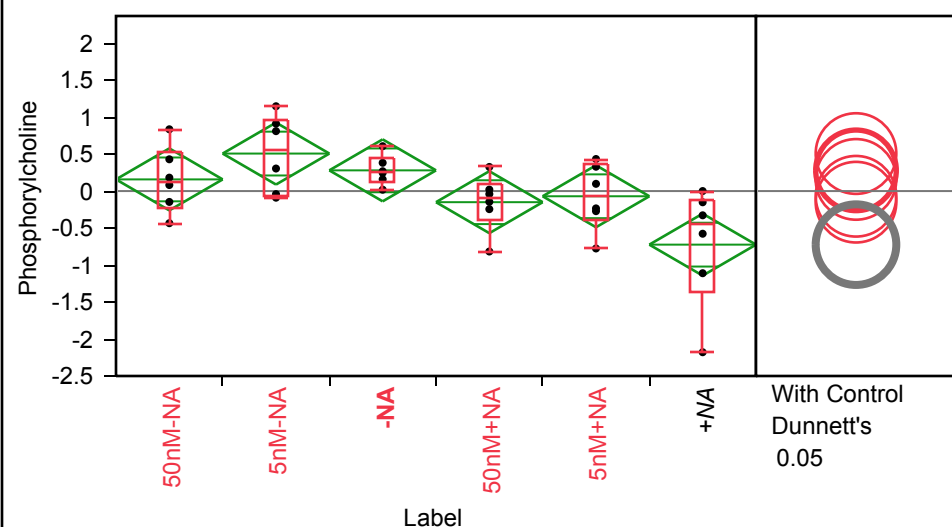

### Quantiles

| Level   | Minimum  | 10%      | 25%      | Median   | 75%      | 90%      | Maximum  |
|---------|----------|----------|----------|----------|----------|----------|----------|
| 50nM-NA | -0.43434 | -0.43434 | -0.21875 | 0.131437 | 0.530925 | 0.83511  | 0.83511  |
| 5nM-NA  | -0.08938 | -0.08938 | -0.05341 | 0.557359 | 0.970436 | 1.146465 | 1.146465 |
| -NA     | 0.018445 | 0.018445 | 0.123931 | 0.256701 | 0.438264 | 0.606373 | 0.606373 |
| 50nM+NA | -0.81712 | -0.81712 | -0.38757 | -0.0929  | 0.09643  | 0.326047 | 0.326047 |
| 5nM+NA  | -0.77599 | -0.77599 | -0.39764 | -0.06816 | 0.355188 | 0.433249 | 0.433249 |
| +NA     | -2.17879 | -2.17879 | -1.37763 | -0.45226 | -0.11358 | 0.000225 | 0.000225 |

### Oneway Anova

#### Summary of Fit

|                            |          |
|----------------------------|----------|
| Rsquare                    | 0.419613 |
| Adj Rsquare                | 0.322882 |
| Root Mean Square Error     | 0.502353 |
| Mean of Response           | 1.11e-10 |
| Observations (or Sum Wgts) | 36       |

#### Analysis of Variance

| Source   | DF | Sum of Squares | Mean Square | F Ratio | Prob > F |
|----------|----|----------------|-------------|---------|----------|
| Label    | 5  | 5.473583       | 1.09472     | 4.3379  | 0.0043 * |
| Error    | 30 | 7.570765       | 0.25236     |         |          |
| C. Total | 35 | 13.044348      |             |         |          |

#### Means for Oneway Anova

| Level   | Number | Mean     | Std Error | Lower 95% | Upper 95% |
|---------|--------|----------|-----------|-----------|-----------|
| 50nM-NA | 6      | 0.15772  | 0.20508   | -0.261    | 0.5766    |
| 5nM-NA  | 6      | 0.50702  | 0.20508   | 0.088     | 0.9259    |
| -NA     | 6      | 0.27992  | 0.20508   | -0.139    | 0.6988    |
| 50nM+NA | 6      | -0.15023 | 0.20508   | -0.569    | 0.2686    |
| 5nM+NA  | 6      | -0.07024 | 0.20508   | -0.489    | 0.3486    |
| +NA     | 6      | -0.72420 | 0.20508   | -1.143    | -0.3054   |

Std Error uses a pooled estimate of error variance

### Means Comparisons

#### Comparisons with a control using Dunnett's Method

### Oneway Analysis of p-hydroxybenzoate By Label

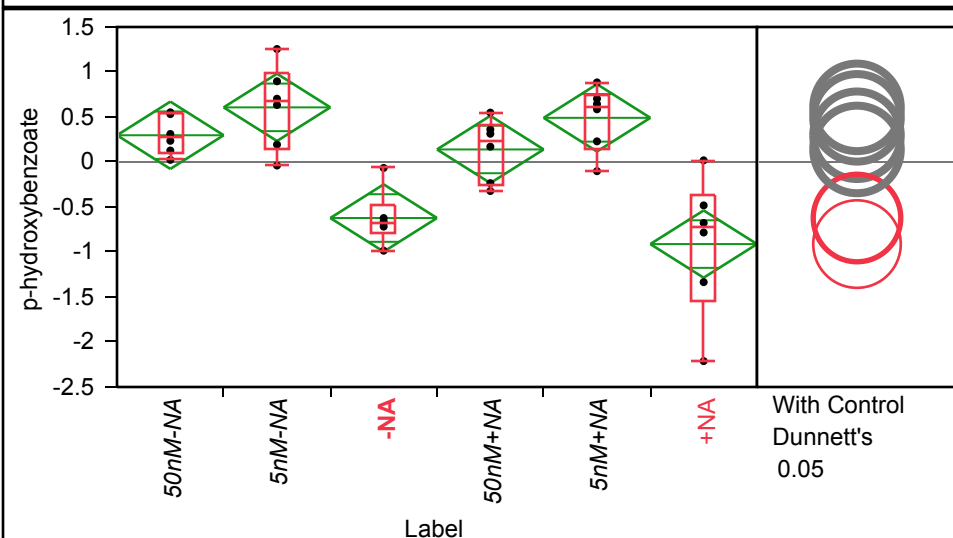

### Quantiles

| Level   | Minimum  | 10%      | 25%      | Median   | 75%      | 90%      | Maximum  |
|---------|----------|----------|----------|----------|----------|----------|----------|
| 50nM-NA | 0.024063 | 0.024063 | 0.101415 | 0.273584 | 0.537309 | 0.552034 | 0.552034 |
| 5nM-NA  | -0.03914 | -0.03914 | 0.135293 | 0.667981 | 0.986375 | 1.255105 | 1.255105 |
| -NA     | -0.98542 | -0.98542 | -0.78472 | -0.671   | -0.48369 | -0.0661  | -0.0661  |
| 50nM+NA | -0.32225 | -0.32225 | -0.2569  | 0.242042 | 0.40845  | 0.548618 | 0.548618 |
| 5nM+NA  | -0.10197 | -0.10197 | 0.146536 | 0.6146   | 0.748329 | 0.884228 | 0.884228 |
| +NA     | -2.21198 | -2.21198 | -1.55412 | -0.73053 | -0.35713 | 0.018491 | 0.018491 |

### Oneway Anova

#### Summary of Fit

|                            |          |
|----------------------------|----------|
| Rsquare                    | 0.658289 |
| Adj Rsquare                | 0.601337 |
| Root Mean Square Error     | 0.448318 |
| Mean of Response           | -5.6e-10 |
| Observations (or Sum Wgts) | 36       |

#### Analysis of Variance

| Source   | DF | Sum of Squares | Mean Square | F Ratio | Prob > F |
|----------|----|----------------|-------------|---------|----------|
| Label    | 5  | 11.615853      | 2.32317     | 11.5587 | <.0001 * |
| Error    | 30 | 6.029665       | 0.20099     |         |          |
| C. Total | 35 | 17.645518      |             |         |          |

#### Means for Oneway Anova

| Level   | Number | Mean     | Std Error | Lower 95% | Upper 95% |
|---------|--------|----------|-----------|-----------|-----------|
| 50nM-NA | 6      | 0.29714  | 0.18302   | -0.077    | 0.6709    |
| 5nM-NA  | 6      | 0.60703  | 0.18302   | 0.233     | 0.9808    |
| -NA     | 6      | -0.62237 | 0.18302   | -0.996    | -0.2486   |
| 50nM+NA | 6      | 0.13951  | 0.18302   | -0.234    | 0.5133    |
| 5nM+NA  | 6      | 0.49064  | 0.18302   | 0.117     | 0.8644    |
| +NA     | 6      | -0.91195 | 0.18302   | -1.286    | -0.5382   |

Std Error uses a pooled estimate of error variance

### Means Comparisons

#### Comparisons with a control using Dunnett's Method

### Oneway Analysis of PI(16:0/20:2) By Label

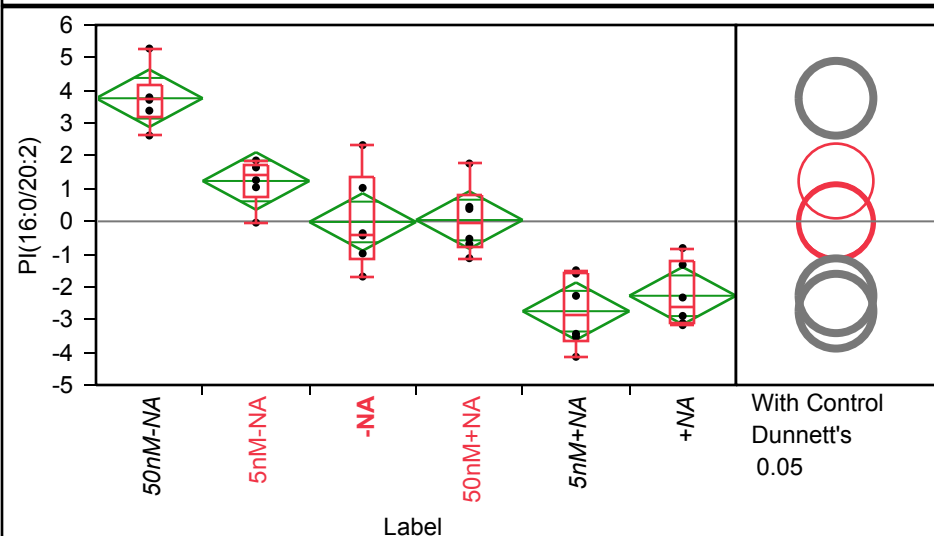

### Quantiles

| Level   | Minimum  | 10%      | 25%      | Median   | 75%      | 90%      | Maximum  |
|---------|----------|----------|----------|----------|----------|----------|----------|
| 50nM-NA | 2.622976 | 2.622976 | 3.192662 | 3.746502 | 4.162221 | 5.281024 | 5.281024 |
| 5nM-NA  | -0.03878 | -0.03878 | 0.772407 | 1.445814 | 1.70191  | 1.860337 | 1.860337 |
| -NA     | -1.68671 | -1.68671 | -1.15856 | -0.39627 | 1.349289 | 2.328989 | 2.328989 |
| 50nM+NA | -1.12559 | -1.12559 | -0.8001  | -0.07598 | 0.776144 | 1.767703 | 1.767703 |
| 5nM+NA  | -4.13872 | -4.13872 | -3.67955 | -2.8559  | -1.57151 | -1.49447 | -1.49447 |
| +NA     | -3.17158 | -3.17158 | -3.12473 | -2.60835 | -1.19849 | -0.816   | -0.816   |

### Oneway Anova

#### Summary of Fit

|                            |          |
|----------------------------|----------|
| Rsquare                    | 0.836584 |
| Adj Rsquare                | 0.809348 |
| Root Mean Square Error     | 1.052876 |
| Mean of Response           | 2.78e-10 |
| Observations (or Sum Wgts) | 36       |

#### Analysis of Variance

| Source   | DF | Sum of Squares | Mean Square | F Ratio | Prob > F |
|----------|----|----------------|-------------|---------|----------|
| Label    | 5  | 170.25160      | 34.0503     | 30.7161 | <.0001 * |
| Error    | 30 | 33.25643       | 1.1085      |         |          |
| C. Total | 35 | 203.50803      |             |         |          |

#### Means for Oneway Anova

| Level   | Number | Mean    | Std Error | Lower 95% | Upper 95% |
|---------|--------|---------|-----------|-----------|-----------|
| 50nM-NA | 6      | 3.7615  | 0.42983   | 2.884     | 4.639     |
| 5nM-NA  | 6      | 1.2342  | 0.42983   | 0.356     | 2.112     |
| -NA     | 6      | -0.0183 | 0.42983   | -0.896    | 0.859     |
| 50nM+NA | 6      | 0.0407  | 0.42983   | -0.837    | 0.919     |
| 5nM+NA  | 6      | -2.7448 | 0.42983   | -3.623    | -1.867    |
| +NA     | 6      | -2.2732 | 0.42983   | -3.151    | -1.395    |

Std Error uses a pooled estimate of error variance

### Means Comparisons

#### Comparisons with a control using Dunnett's Method

### Oneway Analysis of PI(16:0/22:4) By Label

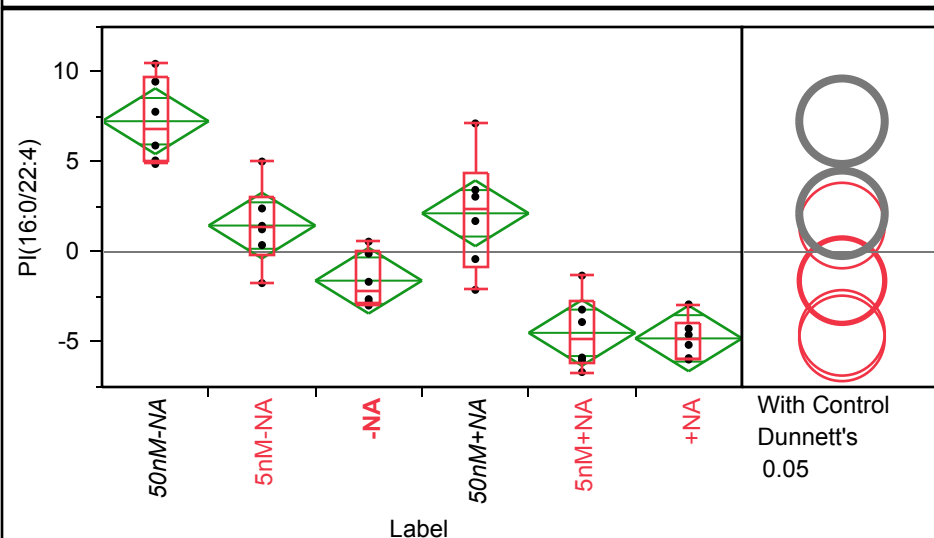

### Quantiles

| Level   | Minimum  | 10%      | 25%      | Median   | 75%      | 90%      | Maximum  |
|---------|----------|----------|----------|----------|----------|----------|----------|
| 50nM-NA | 4.889046 | 4.889046 | 5.036596 | 6.852175 | 9.710947 | 10.45267 | 10.45267 |
| 5nM-NA  | -1.72795 | -1.72795 | -0.143   | 1.356983 | 3.070265 | 5.024486 | 5.024486 |
| -NA     | -2.97463 | -2.97463 | -2.83312 | -2.13876 | 0.076361 | 0.573977 | 0.573977 |
| 50nM+NA | -2.1021  | -2.1021  | -0.81975 | 2.397221 | 4.372343 | 7.143888 | 7.143888 |
| 5nM+NA  | -6.67021 | -6.67021 | -6.17586 | -4.8782  | -2.72752 | -1.31286 | -1.31286 |
| +NA     | -5.97582 | -5.97582 | -5.91734 | -4.88064 | -3.91814 | -2.91044 | -2.91044 |

### Oneway Anova

#### Summary of Fit

|                            |          |
|----------------------------|----------|
| Rsquare                    | 0.814697 |
| Adj Rsquare                | 0.783813 |
| Root Mean Square Error     | 2.18882  |
| Mean of Response           | 2.778e-9 |
| Observations (or Sum Wgts) | 36       |

#### Analysis of Variance

| Source   | DF | Sum of Squares | Mean Square | F Ratio | Prob > F |
|----------|----|----------------|-------------|---------|----------|
| Label    | 5  | 631.90747      | 126.381     | 26.3793 | <.0001 * |
| Error    | 30 | 143.72794      | 4.791       |         |          |
| C. Total | 35 | 775.63542      |             |         |          |

#### Means for Oneway Anova

| Level   | Number | Mean    | Std Error | Lower 95% | Upper 95% |
|---------|--------|---------|-----------|-----------|-----------|
| 50nM-NA | 6      | 7.2659  | 0.89358   | 5.441     | 9.091     |
| 5nM-NA  | 6      | 1.4691  | 0.89358   | -0.356    | 3.294     |
| -NA     | 6      | -1.5923 | 0.89358   | -3.417    | 0.233     |
| 50nM+NA | 6      | 2.1487  | 0.89358   | 0.324     | 3.974     |
| 5nM+NA  | 6      | -4.4916 | 0.89358   | -6.317    | -2.667    |
| +NA     | 6      | -4.7999 | 0.89358   | -6.625    | -2.975    |

Std Error uses a pooled estimate of error variance

### Means Comparisons

#### Comparisons with a control using Dunnett's Method

### Oneway Analysis of PI(16:1/22:4) By Label

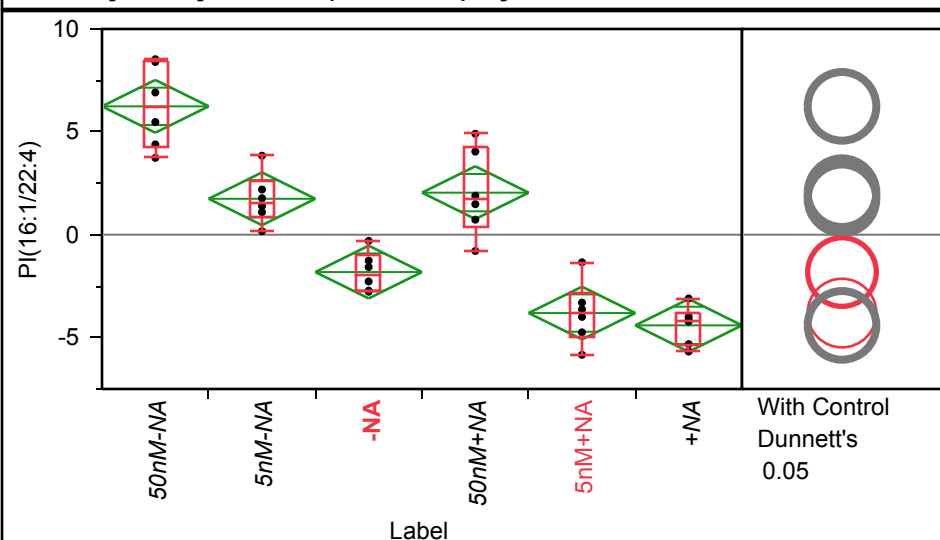

### Quantiles

| Level   | Minimum  | 10%      | 25%      | Median   | 75%      | 90%      | Maximum  |
|---------|----------|----------|----------|----------|----------|----------|----------|
| 50nM-NA | 3.735954 | 3.735954 | 4.224711 | 6.195558 | 8.430433 | 8.530166 | 8.530166 |
| 5nM-NA  | 0.172032 | 0.172032 | 0.865309 | 1.585636 | 2.607733 | 3.839856 | 3.839856 |
| -NA     | -2.77131 | -2.77131 | -2.73079 | -1.92346 | -1.01944 | -0.29857 | -0.29857 |
| 50nM+NA | -0.79038 | -0.79038 | 0.351371 | 1.688251 | 4.257241 | 4.906469 | 4.906469 |
| 5nM+NA  | -5.83738 | -5.83738 | -5.01974 | -3.81062 | -2.8106  | -1.34221 | -1.34221 |
| +NA     | -5.67752 | -5.67752 | -5.4091  | -4.17643 | -3.76872 | -3.10075 | -3.10075 |

### Oneway Anova

#### Summary of Fit

|                            |          |
|----------------------------|----------|
| Rsquare                    | 0.875779 |
| Adj Rsquare                | 0.855076 |
| Root Mean Square Error     | 1.538043 |
| Mean of Response           | -3e-16   |
| Observations (or Sum Wgts) | 36       |

#### Analysis of Variance

| Source   | DF | Sum of Squares | Mean Square | F Ratio | Prob > F |
|----------|----|----------------|-------------|---------|----------|
| Label    | 5  | 500.33369      | 100.067     | 42.3012 | <.0001 * |
| Error    | 30 | 70.96731       | 2.366       |         |          |
| C. Total | 35 | 571.30100      |             |         |          |

#### Means for Oneway Anova

| Level   | Number | Mean    | Std Error | Lower 95% | Upper 95% |
|---------|--------|---------|-----------|-----------|-----------|
| 50nM-NA | 6      | 6.2403  | 0.62790   | 4.958     | 7.523     |
| 5nM-NA  | 6      | 1.7461  | 0.62790   | 0.464     | 3.028     |
| -NA     | 6      | -1.8156 | 0.62790   | -3.098    | -0.533    |
| 50nM+NA | 6      | 2.0442  | 0.62790   | 0.762     | 3.327     |
| 5nM+NA  | 6      | -3.8080 | 0.62790   | -5.090    | -2.526    |
| +NA     | 6      | -4.4070 | 0.62790   | -5.689    | -3.125    |

Std Error uses a pooled estimate of error variance

### Means Comparisons

#### Comparisons with a control using Dunnett's Method

### Oneway Analysis of Piperidine By Label

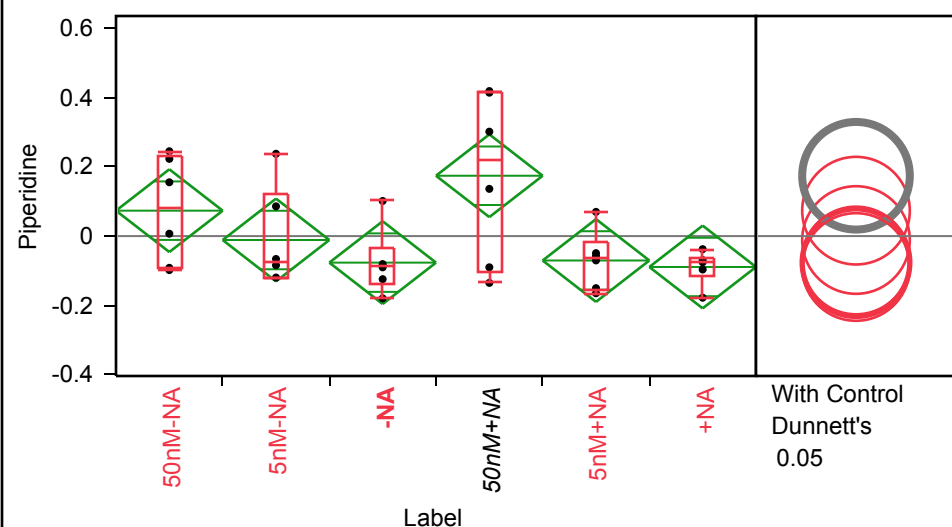

### Quantiles

| Level   | Minimum  | 10%      | 25%      | Median   | 75%      | 90%      | Maximum  |
|---------|----------|----------|----------|----------|----------|----------|----------|
| 50nM-NA | -0.0982  | -0.0982  | -0.09338 | 0.081181 | 0.22872  | 0.245163 | 0.245163 |
| 5nM-NA  | -0.12162 | -0.12162 | -0.12026 | -0.07525 | 0.123956 | 0.237835 | 0.237835 |
| -NA     | -0.17995 | -0.17995 | -0.13836 | -0.08814 | -0.03534 | 0.101488 | 0.101488 |
| 50nM+NA | -0.13523 | -0.13523 | -0.1015  | 0.219133 | 0.415654 | 0.419119 | 0.419119 |
| 5nM+NA  | -0.1652  | -0.1652  | -0.15419 | -0.06402 | -0.01951 | 0.069946 | 0.069946 |
| +NA     | -0.17804 | -0.17804 | -0.11694 | -0.077   | -0.06148 | -0.03778 | -0.03778 |

### Oneway Anova

#### Summary of Fit

|                            |          |
|----------------------------|----------|
| Rsquare                    | 0.347614 |
| Adj Rsquare                | 0.238883 |
| Root Mean Square Error     | 0.143382 |
| Mean of Response           | -2.8e-11 |
| Observations (or Sum Wgts) | 36       |

#### Analysis of Variance

| Source   | DF | Sum of Squares | Mean Square | F Ratio | Prob > F |
|----------|----|----------------|-------------|---------|----------|
| Label    | 5  | 0.32862516     | 0.065725    | 3.1970  | 0.0197 * |
| Error    | 30 | 0.61674784     | 0.020558    |         |          |
| C. Total | 35 | 0.94537300     |             |         |          |

#### Means for Oneway Anova

| Level   | Number | Mean     | Std Error | Lower 95% | Upper 95% |
|---------|--------|----------|-----------|-----------|-----------|
| 50nM-NA | 6      | 0.07347  | 0.05854   | -0.0461   | 0.19301   |
| 5nM-NA  | 6      | -0.01135 | 0.05854   | -0.1309   | 0.10820   |
| -NA     | 6      | -0.07670 | 0.05854   | -0.1962   | 0.04285   |
| 50nM+NA | 6      | 0.17440  | 0.05854   | 0.0549    | 0.29394   |
| 5nM+NA  | 6      | -0.07053 | 0.05854   | -0.1901   | 0.04902   |
| +NA     | 6      | -0.08930 | 0.05854   | -0.2088   | 0.03025   |

Std Error uses a pooled estimate of error variance

### Means Comparisons

#### Comparisons with a control using Dunnett's Method

### Oneway Analysis of proline By Label

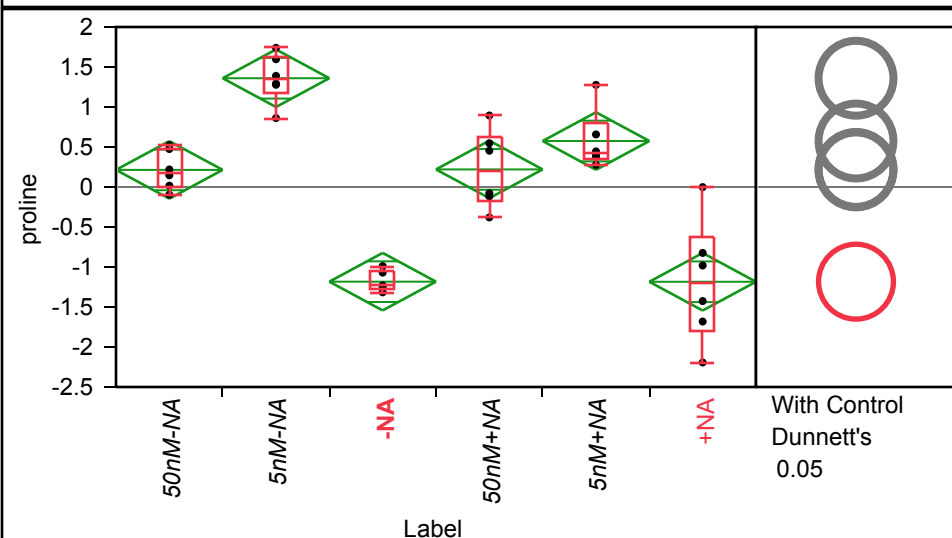

### Quantiles

| Level   | Minimum  | 10%      | 25%      | Median   | 75%      | 90%      | Maximum  |
|---------|----------|----------|----------|----------|----------|----------|----------|
| 50nM-NA | -0.09636 | -0.09636 | -0.01155 | 0.182685 | 0.486843 | 0.522844 | 0.522844 |
| 5nM-NA  | 0.861628 | 0.861628 | 1.173658 | 1.340739 | 1.632742 | 1.73968  | 1.73968  |
| -NA     | -1.31672 | -1.31672 | -1.27342 | -1.23246 | -1.04997 | -0.98916 | -0.98916 |
| 50nM+NA | -0.38013 | -0.38013 | -0.18254 | 0.187776 | 0.633393 | 0.893313 | 0.893313 |
| 5nM+NA  | 0.27727  | 0.27727  | 0.352838 | 0.429861 | 0.811611 | 1.276194 | 1.276194 |
| +NA     | -2.1934  | -2.1934  | -1.80965 | -1.20345 | -0.61844 | -0.00162 | -0.00162 |

### Oneway Anova

#### Summary of Fit

|                            |          |
|----------------------------|----------|
| Rsquare                    | 0.845114 |
| Adj Rsquare                | 0.8193   |
| Root Mean Square Error     | 0.431361 |
| Mean of Response           | -2.8e-10 |
| Observations (or Sum Wgts) | 36       |

#### Analysis of Variance

| Source   | DF | Sum of Squares | Mean Square | F Ratio | Prob > F |
|----------|----|----------------|-------------|---------|----------|
| Label    | 5  | 30.458380      | 6.09168     | 32.7383 | <.0001 * |
| Error    | 30 | 5.582159       | 0.18607     |         |          |
| C. Total | 35 | 36.040540      |             |         |          |

#### Means for Oneway Anova

| Level   | Number | Mean    | Std Error | Lower 95% | Upper 95% |
|---------|--------|---------|-----------|-----------|-----------|
| 50nM-NA | 6      | 0.2139  | 0.17610   | -0.146    | 0.574     |
| 5nM-NA  | 6      | 1.3596  | 0.17610   | 1.000     | 1.719     |
| -NA     | 6      | -1.1833 | 0.17610   | -1.543    | -0.824    |
| 50nM+NA | 6      | 0.2198  | 0.17610   | -0.140    | 0.579     |
| 5nM+NA  | 6      | 0.5747  | 0.17610   | 0.215     | 0.934     |
| +NA     | 6      | -1.1846 | 0.17610   | -1.544    | -0.825    |

Std Error uses a pooled estimate of error variance

### Means Comparisons

#### Comparisons with a control using Dunnett's Method

### Oneway Analysis of purine By Label

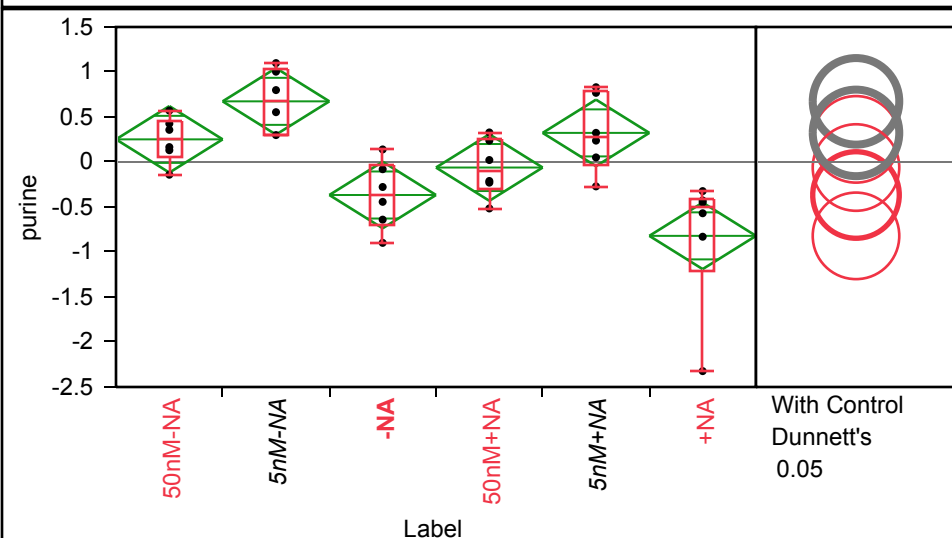

### Quantiles

| Level   | Minimum  | 10%      | 25%      | Median   | 75%      | 90%      | Maximum  |
|---------|----------|----------|----------|----------|----------|----------|----------|
| 50nM-NA | -0.14121 | -0.14121 | 0.062804 | 0.261477 | 0.462102 | 0.570996 | 0.570996 |
| 5nM-NA  | 0.289841 | 0.289841 | 0.296705 | 0.676261 | 1.027298 | 1.09884  | 1.09884  |
| -NA     | -0.89841 | -0.89841 | -0.70501 | -0.36025 | -0.02526 | 0.139435 | 0.139435 |
| 50nM+NA | -0.516   | -0.516   | -0.30126 | -0.09457 | 0.260297 | 0.328202 | 0.328202 |
| 5nM+NA  | -0.27092 | -0.27092 | -0.02976 | 0.280697 | 0.784122 | 0.830723 | 0.830723 |
| +NA     | -2.32355 | -2.32355 | -1.20366 | -0.50966 | -0.40152 | -0.32354 | -0.32354 |

### Oneway Anova

#### Summary of Fit

|                            |          |
|----------------------------|----------|
| Rsquare                    | 0.593446 |
| Adj Rsquare                | 0.525687 |
| Root Mean Square Error     | 0.443242 |
| Mean of Response           | -8.3e-10 |
| Observations (or Sum Wgts) | 36       |

#### Analysis of Variance

| Source   | DF | Sum of Squares | Mean Square | F Ratio | Prob > F |
|----------|----|----------------|-------------|---------|----------|
| Label    | 5  | 8.603320       | 1.72066     | 8.7582  | <.0001 * |
| Error    | 30 | 5.893895       | 0.19646     |         |          |
| C. Total | 35 | 14.497215      |             |         |          |

#### Means for Oneway Anova

| Level   | Number | Mean     | Std Error | Lower 95% | Upper 95% |
|---------|--------|----------|-----------|-----------|-----------|
| 50nM-NA | 6      | 0.25156  | 0.18095   | -0.118    | 0.621     |
| 5nM-NA  | 6      | 0.67394  | 0.18095   | 0.304     | 1.043     |
| -NA     | 6      | -0.36669 | 0.18095   | -0.736    | 0.00286   |
| 50nM+NA | 6      | -0.06149 | 0.18095   | -0.431    | 0.308     |
| 5nM+NA  | 6      | 0.32340  | 0.18095   | -0.046    | 0.693     |
| +NA     | 6      | -0.82071 | 0.18095   | -1.190    | -0.451    |

Std Error uses a pooled estimate of error variance

### Means Comparisons

#### Comparisons with a control using Dunnett's Method

### Oneway Analysis of pyridoxine By Label

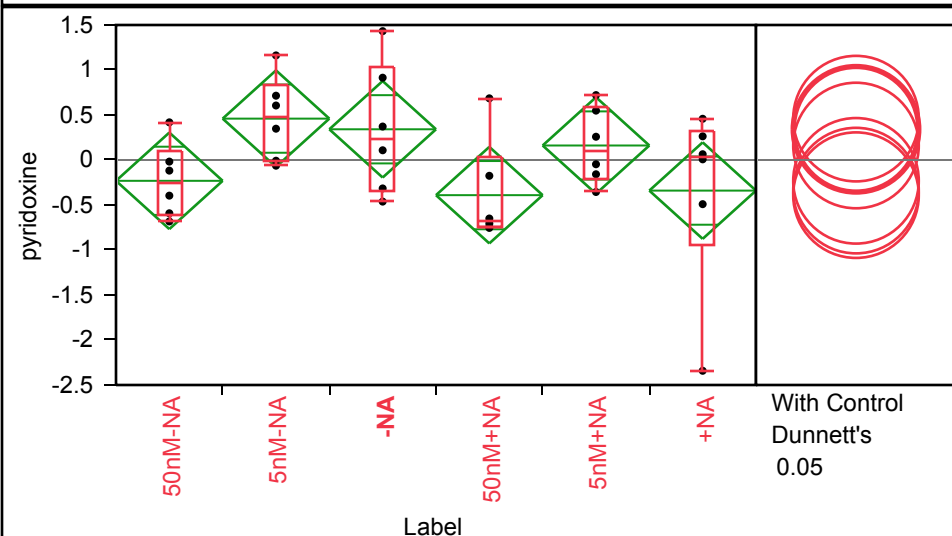

### Quantiles

| Level   | Minimum  | 10%      | 25%      | Median   | 75%      | 90%      | Maximum  |
|---------|----------|----------|----------|----------|----------|----------|----------|
| 50nM-NA | -0.68268 | -0.68268 | -0.61464 | -0.25708 | 0.091251 | 0.418396 | 0.418396 |
| 5nM-NA  | -0.06332 | -0.06332 | -0.02197 | 0.476575 | 0.826284 | 1.161902 | 1.161902 |
| -NA     | -0.46226 | -0.46226 | -0.3526  | 0.239913 | 1.043693 | 1.431506 | 1.431506 |
| 50nM+NA | -0.75473 | -0.75473 | -0.74563 | -0.678   | 0.039592 | 0.685129 | 0.685129 |
| 5nM+NA  | -0.35551 | -0.35551 | -0.2078  | 0.105579 | 0.591727 | 0.720972 | 0.720972 |
| +NA     | -2.34202 | -2.34202 | -0.95355 | 0.035745 | 0.311857 | 0.457978 | 0.457978 |

### Oneway Anova

#### Summary of Fit

|                            |          |
|----------------------------|----------|
| Rsquare                    | 0.246268 |
| Adj Rsquare                | 0.120646 |
| Root Mean Square Error     | 0.642997 |
| Mean of Response           | 5.56e-11 |
| Observations (or Sum Wgts) | 36       |

#### Analysis of Variance

| Source   | DF | Sum of Squares | Mean Square | F Ratio | Prob > F |
|----------|----|----------------|-------------|---------|----------|
| Label    | 5  | 4.052565       | 0.810513    | 1.9604  | 0.1136   |
| Error    | 30 | 12.403367      | 0.413446    |         |          |
| C. Total | 35 | 16.455932      |             |         |          |

#### Means for Oneway Anova

| Level   | Number | Mean     | Std Error | Lower 95% | Upper 95% |
|---------|--------|----------|-----------|-----------|-----------|
| 50nM-NA | 6      | -0.23137 | 0.26250   | -0.7675   | 0.30473   |
| 5nM-NA  | 6      | 0.45966  | 0.26250   | -0.0764   | 0.99576   |
| -NA     | 6      | 0.34124  | 0.26250   | -0.1949   | 0.87734   |
| 50nM+NA | 6      | -0.39063 | 0.26250   | -0.9267   | 0.14547   |
| 5nM+NA  | 6      | 0.16112  | 0.26250   | -0.3750   | 0.69722   |
| +NA     | 6      | -0.34002 | 0.26250   | -0.8761   | 0.19608   |

Std Error uses a pooled estimate of error variance

### Means Comparisons

#### Comparisons with a control using Dunnett's Method

### Oneway Analysis of Pyroglutamate By Label

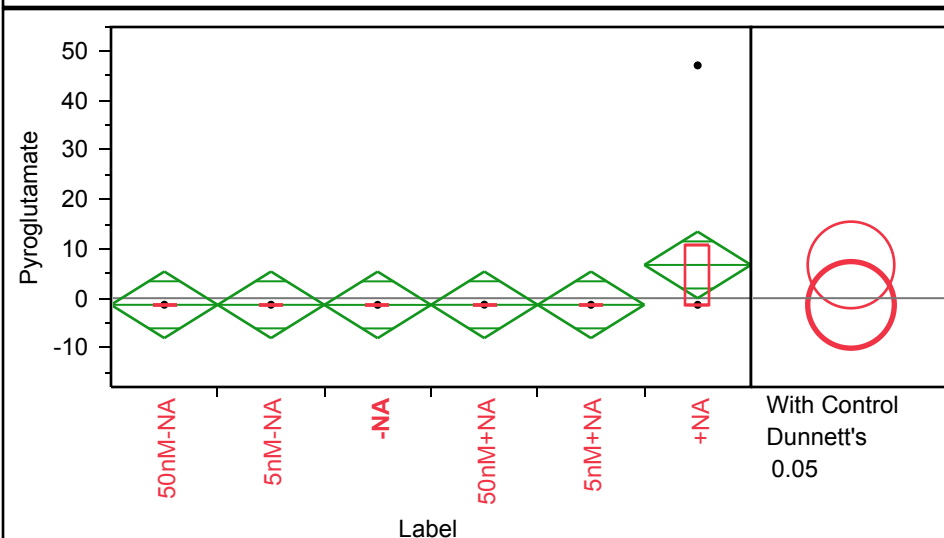

### Quantiles

| Level   | Minimum  | 10%      | 25%      | Median   | 75%      | 90%      | Maximum  |
|---------|----------|----------|----------|----------|----------|----------|----------|
| 50nM-NA | -1.35239 | -1.35239 | -1.35082 | -1.34217 | -1.33362 | -1.32511 | -1.32511 |
| 5nM-NA  | -1.36094 | -1.36094 | -1.35335 | -1.34344 | -1.33717 | -1.32914 | -1.32914 |
| -NA     | -1.36308 | -1.36308 | -1.36059 | -1.35914 | -1.35392 | -1.34949 | -1.34949 |
| 50nM+NA | -1.3608  | -1.3608  | -1.36079 | -1.34393 | -1.32067 | -1.31275 | -1.31275 |
| 5nM+NA  | -1.34875 | -1.34875 | -1.34785 | -1.34671 | -1.34287 | -1.34006 | -1.34006 |
| +NA     | -1.35867 | -1.35867 | -1.35412 | -1.34264 | 10.77417 | 47.11846 | 47.11846 |

### Oneway Anova

#### Summary of Fit

|                            |          |
|----------------------------|----------|
| Rsquare                    | 0.142815 |
| Adj Rsquare                | -4.88e-5 |
| Root Mean Square Error     | 8.077655 |
| Mean of Response           | -2.78e-8 |
| Observations (or Sum Wgts) | 36       |

#### Analysis of Variance

| Source   | DF | Sum of Squares | Mean Square | F Ratio | Prob > F |
|----------|----|----------------|-------------|---------|----------|
| Label    | 5  | 326.1312       | 65.2262     | 0.9997  | 0.4348   |
| Error    | 30 | 1957.4553      | 65.2485     |         |          |
| C. Total | 35 | 2283.5865      |             |         |          |

#### Means for Oneway Anova

| Level   | Number | Mean    | Std Error | Lower 95% | Upper 95% |
|---------|--------|---------|-----------|-----------|-----------|
| 50nM-NA | 6      | -1.3414 | 3.2977    | -8.076    | 5.393     |
| 5nM-NA  | 6      | -1.3446 | 3.2977    | -8.079    | 5.390     |
| -NA     | 6      | -1.3577 | 3.2977    | -8.092    | 5.377     |
| 50nM+NA | 6      | -1.3409 | 3.2977    | -8.076    | 5.394     |
| 5nM+NA  | 6      | -1.3456 | 3.2977    | -8.080    | 5.389     |
| +NA     | 6      | 6.7302  | 3.2977    | -0.0046   | 13.465    |

Std Error uses a pooled estimate of error variance

### Means Comparisons

#### Comparisons with a control using Dunnett's Method

### Oneway Analysis of pyruvate By Label

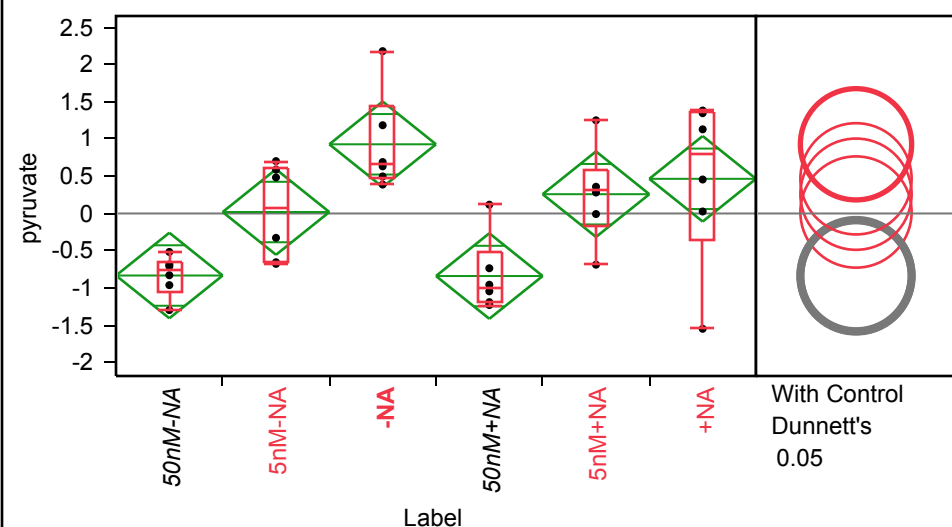

### Quantiles

| Level   | Minimum  | 10%      | 25%      | Median   | 75%      | 90%      | Maximum  |
|---------|----------|----------|----------|----------|----------|----------|----------|
| 50nM-NA | -1.29624 | -1.29624 | -1.0452  | -0.76858 | -0.64175 | -0.51627 | -0.51627 |
| 5nM-NA  | -0.67587 | -0.67587 | -0.65976 | 0.078146 | 0.617025 | 0.702632 | 0.702632 |
| -NA     | 0.387943 | 0.387943 | 0.469669 | 0.661469 | 1.432757 | 2.178318 | 2.178318 |
| 50nM+NA | -1.2284  | -1.2284  | -1.19992 | -1.00031 | -0.52178 | 0.117766 | 0.117766 |
| 5nM+NA  | -0.68714 | -0.68714 | -0.17746 | 0.319419 | 0.581307 | 1.250071 | 1.250071 |
| +NA     | -1.54742 | -1.54742 | -0.36693 | 0.792507 | 1.354652 | 1.381439 | 1.381439 |

### Oneway Anova

#### Summary of Fit

|                            |          |
|----------------------------|----------|
| Rsquare                    | 0.517854 |
| Adj Rsquare                | 0.437497 |
| Root Mean Square Error     | 0.68818  |
| Mean of Response           | -2.8e-11 |
| Observations (or Sum Wgts) | 36       |

#### Analysis of Variance

| Source   | DF | Sum of Squares | Mean Square | F Ratio | Prob > F |
|----------|----|----------------|-------------|---------|----------|
| Label    | 5  | 15.26007       | 3.05200     | 6.4444  | 0.0004 * |
| Error    | 30 | 14.207745      | 0.47359     |         |          |
| C. Total | 35 | 29.467753      |             |         |          |

#### Means for Oneway Anova

| Level   | Number | Mean     | Std Error | Lower 95% | Upper 95% |
|---------|--------|----------|-----------|-----------|-----------|
| 50nM-NA | 6      | -0.83246 | 0.28095   | -1.406    | -0.259    |
| 5nM-NA  | 6      | 0.01952  | 0.28095   | -0.554    | 0.593     |
| -NA     | 6      | 0.92839  | 0.28095   | 0.355     | 1.502     |
| 50nM+NA | 6      | -0.83944 | 0.28095   | -1.413    | -0.266    |
| 5nM+NA  | 6      | 0.25876  | 0.28095   | -0.315    | 0.833     |
| +NA     | 6      | 0.46522  | 0.28095   | -0.109    | 1.039     |

Std Error uses a pooled estimate of error variance

### Means Comparisons

#### Comparisons with a control using Dunnett's Method

### Oneway Analysis of riboflavin By Label

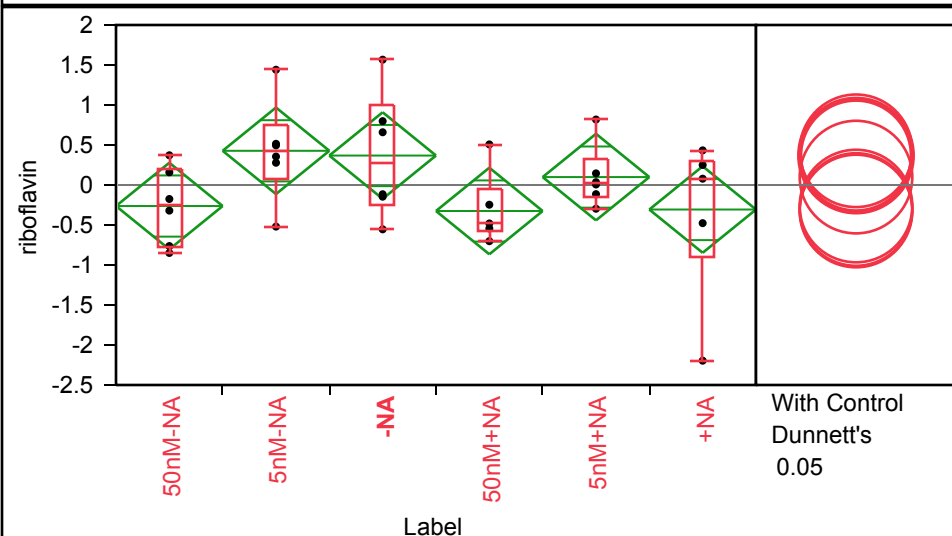

### Quantiles

| Level   | Minimum  | 10%      | 25%      | Median   | 75%      | 90%      | Maximum  |
|---------|----------|----------|----------|----------|----------|----------|----------|
| 50nM-NA | -0.84942 | -0.84942 | -0.78472 | -0.24765 | 0.211871 | 0.371273 | 0.371273 |
| 5nM-NA  | -0.51995 | -0.51995 | 0.07864  | 0.425552 | 0.74631  | 1.440585 | 1.440585 |
| -NA     | -0.55408 | -0.55408 | -0.24815 | 0.271815 | 0.990314 | 1.566474 | 1.566474 |
| 50nM+NA | -0.7022  | -0.7022  | -0.58343 | -0.48249 | -0.05799 | 0.507374 | 0.507374 |
| 5nM+NA  | -0.2967  | -0.2967  | -0.15998 | 0.020783 | 0.313513 | 0.818381 | 0.818381 |
| +NA     | -2.19603 | -2.19603 | -0.90674 | 0.075172 | 0.296213 | 0.433065 | 0.433065 |

### Oneway Anova

#### Summary of Fit

|                            |          |
|----------------------------|----------|
| Rsquare                    | 0.220932 |
| Adj Rsquare                | 0.091087 |
| Root Mean Square Error     | 0.648713 |
| Mean of Response           | -5.6e-11 |
| Observations (or Sum Wgts) | 36       |

#### Analysis of Variance

| Source   | DF | Sum of Squares | Mean Square | F Ratio | Prob > F |
|----------|----|----------------|-------------|---------|----------|
| Label    | 5  | 3.580207       | 0.716041    | 1.7015  | 0.1647   |
| Error    | 30 | 12.624846      | 0.420828    |         |          |
| C. Total | 35 | 16.205053      |             |         |          |

#### Means for Oneway Anova

| Level   | Number | Mean     | Std Error | Lower 95% | Upper 95% |
|---------|--------|----------|-----------|-----------|-----------|
| 50nM-NA | 6      | -0.26298 | 0.26484   | -0.8038   | 0.27789   |
| 5nM-NA  | 6      | 0.42747  | 0.26484   | -0.1134   | 0.96833   |
| -NA     | 6      | 0.36802  | 0.26484   | -0.1728   | 0.90888   |
| 50nM+NA | 6      | -0.32502 | 0.26484   | -0.8659   | 0.21585   |
| 5nM+NA  | 6      | 0.09901  | 0.26484   | -0.4419   | 0.63988   |
| +NA     | 6      | -0.30650 | 0.26484   | -0.8474   | 0.23437   |

Std Error uses a pooled estimate of error variance

### Means Comparisons

#### Comparisons with a control using Dunnett's Method

### Oneway Analysis of ribose-5-phosphate By Label

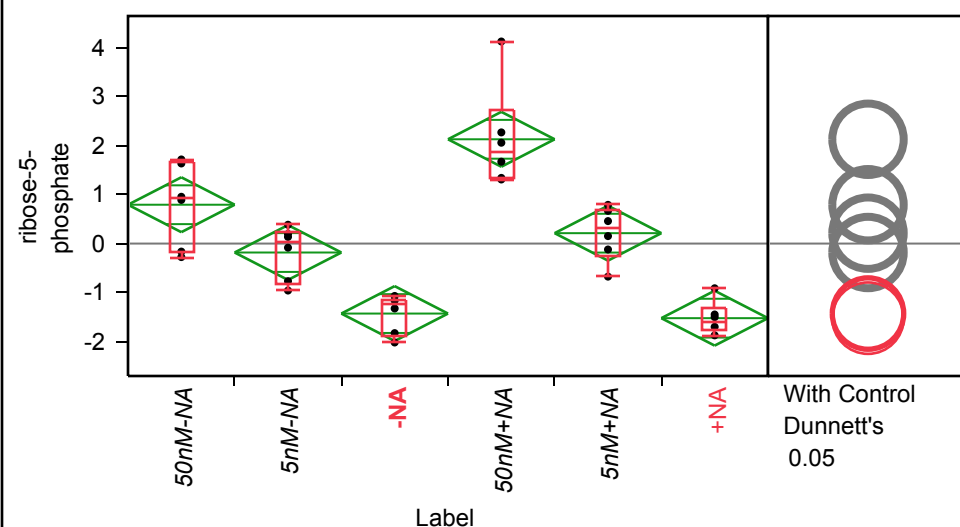

### Quantiles

| Level   | Minimum  | 10%      | 25%      | Median   | 75%      | 90%      | Maximum  |
|---------|----------|----------|----------|----------|----------|----------|----------|
| 50nM-NA | -0.27581 | -0.27581 | -0.19197 | 0.922658 | 1.655226 | 1.716226 | 1.716226 |
| 5nM-NA  | -0.95844 | -0.95844 | -0.81508 | 0.026119 | 0.242212 | 0.383851 | 0.383851 |
| -NA     | -2.01872 | -2.01872 | -1.87541 | -1.24699 | -1.13818 | -1.06908 | -1.06908 |
| 50nM+NA | 1.308132 | 1.308132 | 1.332259 | 1.864634 | 2.732473 | 4.12368  | 4.12368  |
| 5nM+NA  | -0.67468 | -0.67468 | -0.25942 | 0.305554 | 0.698301 | 0.789853 | 0.789853 |
| +NA     | -1.87289 | -1.87289 | -1.74361 | -1.60048 | -1.31385 | -0.9125  | -0.9125  |

### Oneway Anova

#### Summary of Fit

|                            |          |
|----------------------------|----------|
| Rsquare                    | 0.809638 |
| Adj Rsquare                | 0.777911 |
| Root Mean Square Error     | 0.671705 |
| Mean of Response           | 2.78e-10 |
| Observations (or Sum Wgts) | 36       |

#### Analysis of Variance

| Source   | DF | Sum of Squares | Mean Square | F Ratio | Prob > F |
|----------|----|----------------|-------------|---------|----------|
| Label    | 5  | 57.569161      | 11.5138     | 25.5189 | <.0001 * |
| Error    | 30 | 13.535636      | 0.4512      |         |          |
| C. Total | 35 | 71.104797      |             |         |          |

#### Means for Oneway Anova

| Level   | Number | Mean    | Std Error | Lower 95% | Upper 95% |
|---------|--------|---------|-----------|-----------|-----------|
| 50nM-NA | 6      | 0.7928  | 0.27422   | 0.233     | 1.353     |
| 5nM-NA  | 6      | -0.1824 | 0.27422   | -0.742    | 0.378     |
| -NA     | 6      | -1.4284 | 0.27422   | -1.988    | -0.868    |
| 50nM+NA | 6      | 2.1284  | 0.27422   | 1.568     | 2.688     |
| 5nM+NA  | 6      | 0.2122  | 0.27422   | -0.348    | 0.772     |
| +NA     | 6      | -1.5224 | 0.27422   | -2.082    | -0.962    |

Std Error uses a pooled estimate of error variance

### Means Comparisons

#### Comparisons with a control using Dunnett's Method

### Oneway Analysis of S-adenosyl-L-homoCysteine By Label

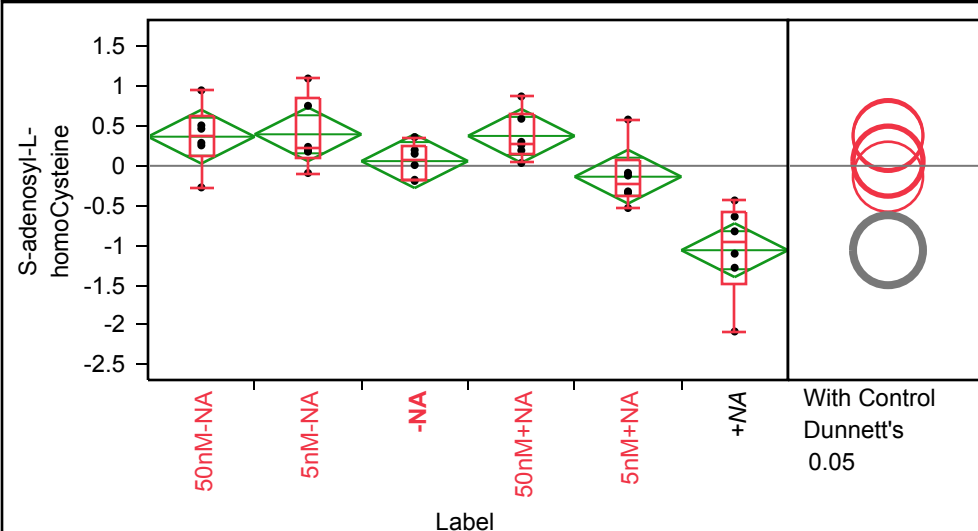

### Quantiles

| Level   | Minimum  | 10%      | 25%      | Median   | 75%      | 90%      | Maximum  |
|---------|----------|----------|----------|----------|----------|----------|----------|
| 50nM-NA | -0.27162 | -0.27162 | 0.124768 | 0.377743 | 0.618435 | 0.948932 | 0.948932 |
| 5nM-NA  | -0.09083 | -0.09083 | 0.110726 | 0.219301 | 0.840427 | 1.097526 | 1.097526 |
| -NA     | -0.18976 | -0.18976 | -0.17913 | 0.080312 | 0.239159 | 0.361099 | 0.361099 |
| 50nM+NA | 0.035687 | 0.035687 | 0.153718 | 0.281262 | 0.661905 | 0.872448 | 0.872448 |
| 5nM+NA  | -0.53072 | -0.53072 | -0.38727 | -0.22202 | 0.079541 | 0.581545 | 0.581545 |
| +NA     | -2.08286 | -2.08286 | -1.48175 | -0.96405 | -0.58747 | -0.43521 | -0.43521 |

### Oneway Anova

#### Summary of Fit

|                            |          |
|----------------------------|----------|
| Rsquare                    | 0.657798 |
| Adj Rsquare                | 0.600764 |
| Root Mean Square Error     | 0.405504 |
| Mean of Response           | 0        |
| Observations (or Sum Wgts) | 36       |

#### Analysis of Variance

| Source   | DF | Sum of Squares | Mean Square | F Ratio | Prob > F |
|----------|----|----------------|-------------|---------|----------|
| Label    | 5  | 9.482468       | 1.89649     | 11.5335 | <.0001 * |
| Error    | 30 | 4.933004       | 0.16443     |         |          |
| C. Total | 35 | 14.415472      |             |         |          |

#### Means for Oneway Anova

| Level   | Number | Mean    | Std Error | Lower 95% | Upper 95% |
|---------|--------|---------|-----------|-----------|-----------|
| 50nM-NA | 6      | 0.3663  | 0.16555   | 0.028     | 0.7044    |
| 5nM-NA  | 6      | 0.3963  | 0.16555   | 0.058     | 0.7344    |
| -NA     | 6      | 0.0591  | 0.16555   | -0.279    | 0.3972    |
| 50nM+NA | 6      | 0.3759  | 0.16555   | 0.038     | 0.7140    |
| 5nM+NA  | 6      | -0.1367 | 0.16555   | -0.475    | 0.2013    |
| +NA     | 6      | -1.0610 | 0.16555   | -1.399    | -0.7229   |

Std Error uses a pooled estimate of error variance

### Means Comparisons

#### Comparisons with a control using Dunnett's Method

### Oneway Analysis of S-adenosyl-L-methioninamine By Label

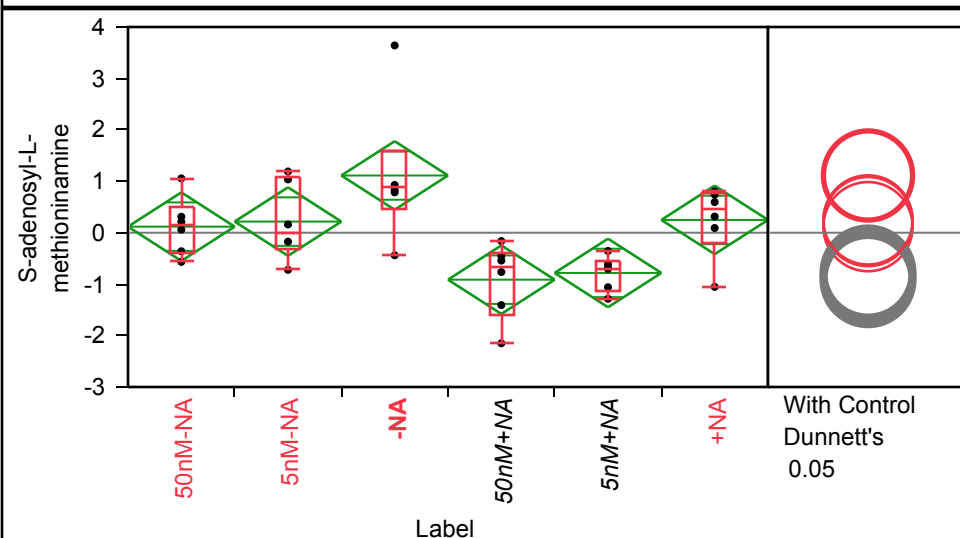

### Quantiles

| Level   | Minimum  | 10%      | 25%      | Median   | 75%      | 90%      | Maximum  |
|---------|----------|----------|----------|----------|----------|----------|----------|
| 50nM-NA | -0.56732 | -0.56732 | -0.41238 | 0.134853 | 0.496433 | 1.055808 | 1.055808 |
| 5nM-NA  | -0.7212  | -0.7212  | -0.32523 | -0.00684 | 1.075006 | 1.19003  | 1.19003  |
| -NA     | -0.43834 | -0.43834 | 0.47923  | 0.87931  | 1.607004 | 3.641227 | 3.641227 |
| 50nM+NA | -2.14965 | -2.14965 | -1.59315 | -0.65303 | -0.37998 | -0.16305 | -0.16305 |
| 5nM+NA  | -1.28403 | -1.28403 | -1.11552 | -0.69062 | -0.54926 | -0.35649 | -0.35649 |
| +NA     | -1.05293 | -1.05293 | -0.19462 | 0.454758 | 0.756285 | 0.803024 | 0.803024 |

### Oneway Anova

#### Summary of Fit

|                            |          |
|----------------------------|----------|
| Rsquare                    | 0.467728 |
| Adj Rsquare                | 0.379016 |
| Root Mean Square Error     | 0.799209 |
| Mean of Response           | 0        |
| Observations (or Sum Wgts) | 36       |

#### Analysis of Variance

| Source   | DF | Sum of Squares | Mean Square | F Ratio | Prob > F |
|----------|----|----------------|-------------|---------|----------|
| Label    | 5  | 16.838417      | 3.36768     | 5.2724  | 0.0014 * |
| Error    | 30 | 19.162028      | 0.63873     |         |          |
| C. Total | 35 | 36.000445      |             |         |          |

#### Means for Oneway Anova

| Level   | Number | Mean    | Std Error | Lower 95% | Upper 95% |
|---------|--------|---------|-----------|-----------|-----------|
| 50nM-NA | 6      | 0.1179  | 0.32628   | -0.548    | 0.784     |
| 5nM-NA  | 6      | 0.2164  | 0.32628   | -0.450    | 0.883     |
| -NA     | 6      | 1.1126  | 0.32628   | 0.446     | 1.779     |
| 50nM+NA | 6      | -0.9131 | 0.32628   | -1.579    | -0.247    |
| 5nM+NA  | 6      | -0.7824 | 0.32628   | -1.449    | -0.116    |
| +NA     | 6      | 0.2486  | 0.32628   | -0.418    | 0.915     |

Std Error uses a pooled estimate of error variance

### Means Comparisons

#### Comparisons with a control using Dunnett's Method

### Oneway Analysis of S-adenosyl-L-methionine By Label

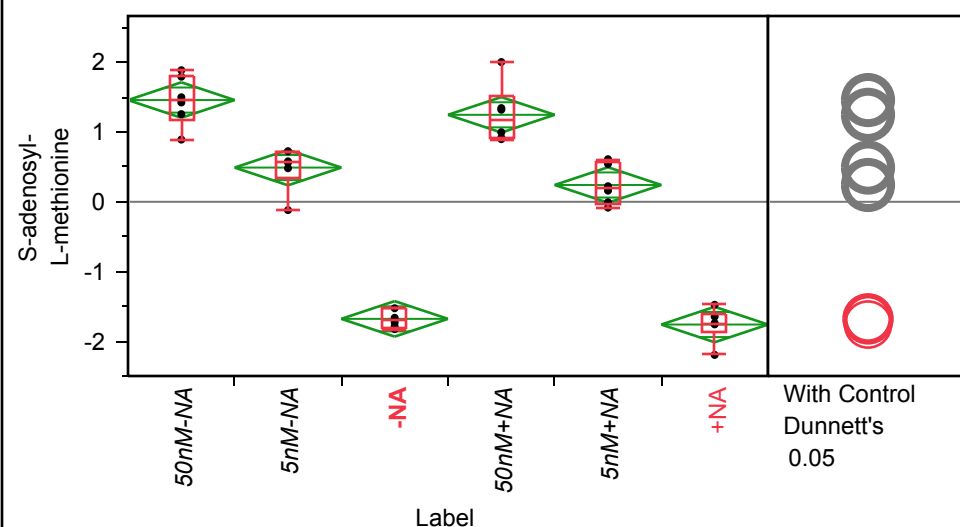

### Quantiles

| Level   | Minimum  | 10%      | 25%      | Median   | 75%      | 90%      | Maximum  |
|---------|----------|----------|----------|----------|----------|----------|----------|
| 50nM-NA | 0.892936 | 0.892936 | 1.167066 | 1.463023 | 1.818878 | 1.88829  | 1.88829  |
| 5nM-NA  | -0.11938 | -0.11938 | 0.331596 | 0.571816 | 0.71792  | 0.726332 | 0.726332 |
| -NA     | -1.82686 | -1.82686 | -1.79896 | -1.69843 | -1.53643 | -1.52748 | -1.52748 |
| 50nM+NA | 0.899371 | 0.899371 | 0.915422 | 1.160153 | 1.509943 | 2.005553 | 2.005553 |
| 5nM+NA  | -0.0838  | -0.0838  | -0.02574 | 0.192143 | 0.560195 | 0.611283 | 0.611283 |
| +NA     | -2.19729 | -2.19729 | -1.86862 | -1.74363 | -1.60438 | -1.47793 | -1.47793 |

### Oneway Anova

#### Summary of Fit

|                            |          |
|----------------------------|----------|
| Rsquare                    | 0.955085 |
| Adj Rsquare                | 0.947599 |
| Root Mean Square Error     | 0.305384 |
| Mean of Response           | 2.78e-11 |
| Observations (or Sum Wgts) | 36       |

#### Analysis of Variance

| Source   | DF | Sum of Squares | Mean Square | F Ratio  | Prob > F |
|----------|----|----------------|-------------|----------|----------|
| Label    | 5  | 59.492950      | 11.8986     | 127.5858 | <.0001 * |
| Error    | 30 | 2.797786       | 0.0933      |          |          |
| C. Total | 35 | 62.290736      |             |          |          |

#### Means for Oneway Anova

| Level   | Number | Mean    | Std Error | Lower 95% | Upper 95% |
|---------|--------|---------|-----------|-----------|-----------|
| 50nM-NA | 6      | 1.4602  | 0.12467   | 1.206     | 1.715     |
| 5nM-NA  | 6      | 0.4913  | 0.12467   | 0.237     | 0.746     |
| -NA     | 6      | -1.6800 | 0.12467   | -1.935    | -1.425    |
| 50nM+NA | 6      | 1.2485  | 0.12467   | 0.994     | 1.503     |
| 5nM+NA  | 6      | 0.2414  | 0.12467   | -0.013    | 0.496     |
| +NA     | 6      | -1.7613 | 0.12467   | -2.016    | -1.507    |

Std Error uses a pooled estimate of error variance

### Means Comparisons

#### Comparisons with a control using Dunnett's Method

### Oneway Analysis of sarcosine By Label

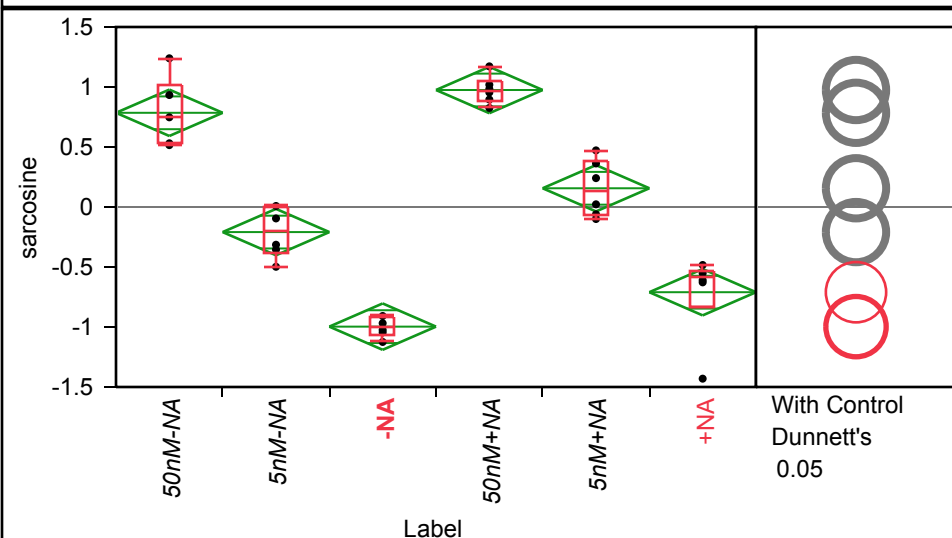

### Quantiles

| Level   | Minimum  | 10%      | 25%      | Median   | 75%      | 90%      | Maximum  |
|---------|----------|----------|----------|----------|----------|----------|----------|
| 50nM-NA | 0.515654 | 0.515654 | 0.526971 | 0.745606 | 1.009568 | 1.239164 | 1.239164 |
| 5nM-NA  | -0.49816 | -0.49816 | -0.39093 | -0.20492 | 0.002713 | 0.008469 | 0.008469 |
| -NA     | -1.12466 | -1.12466 | -1.0653  | -0.99635 | -0.91007 | -0.90832 | -0.90832 |
| 50nM+NA | 0.825332 | 0.825332 | 0.877911 | 0.969126 | 1.057009 | 1.171985 | 1.171985 |
| 5nM+NA  | -0.10014 | -0.10014 | -0.07083 | 0.131454 | 0.390166 | 0.471782 | 0.471782 |
| +NA     | -1.43059 | -1.43059 | -0.8286  | -0.58311 | -0.53488 | -0.48341 | -0.48341 |

### Oneway Anova

#### Summary of Fit

|                            |          |
|----------------------------|----------|
| Rsquare                    | 0.921082 |
| Adj Rsquare                | 0.907929 |
| Root Mean Square Error     | 0.231698 |
| Mean of Response           | -5.6e-11 |
| Observations (or Sum Wgts) | 36       |

#### Analysis of Variance

| Source   | DF | Sum of Squares | Mean Square | F Ratio | Prob > F |
|----------|----|----------------|-------------|---------|----------|
| Label    | 5  | 18.797010      | 3.75940     | 70.0282 | <.0001 * |
| Error    | 30 | 1.610523       | 0.05368     |         |          |
| C. Total | 35 | 20.407533      |             |         |          |

#### Means for Oneway Anova

| Level   | Number | Mean     | Std Error | Lower 95% | Upper 95% |
|---------|--------|----------|-----------|-----------|-----------|
| 50nM-NA | 6      | 0.78497  | 0.09459   | 0.592     | 0.978     |
| 5nM-NA  | 6      | -0.20899 | 0.09459   | -0.402    | -0.016    |
| -NA     | 6      | -0.99697 | 0.09459   | -1.190    | -0.804    |
| 50nM+NA | 6      | 0.97495  | 0.09459   | 0.782     | 1.168     |
| 5nM+NA  | 6      | 0.15608  | 0.09459   | -0.037    | 0.349     |
| +NA     | 6      | -0.71003 | 0.09459   | -0.903    | -0.517    |

Std Error uses a pooled estimate of error variance

### Means Comparisons

#### Comparisons with a control using Dunnett's Method

### Oneway Analysis of Sedoheptulose 7-phosphate By Label

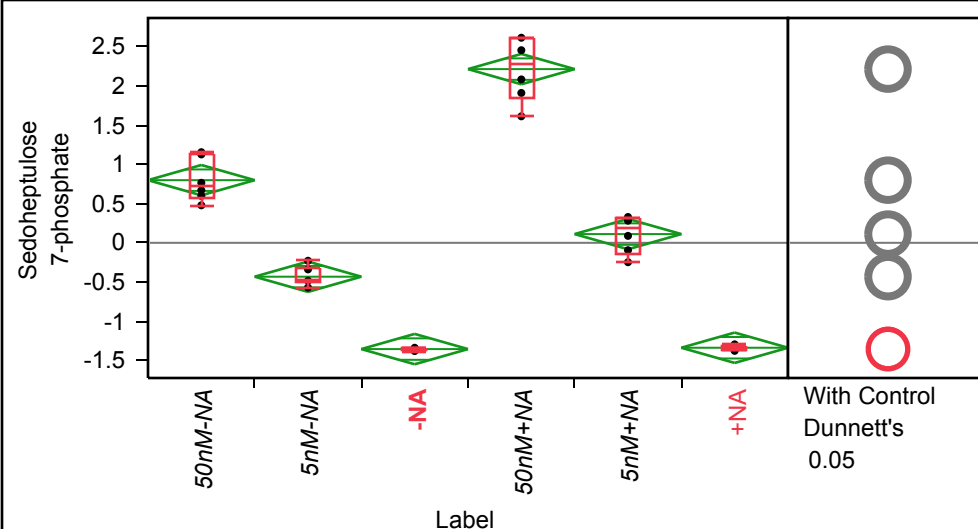

### Quantiles

| Level   | Minimum  | 10%      | 25%      | Median   | 75%      | 90%      | Maximum  |
|---------|----------|----------|----------|----------|----------|----------|----------|
| 50nM-NA | 0.478688 | 0.478688 | 0.568123 | 0.717802 | 1.135072 | 1.156223 | 1.156223 |
| 5nM-NA  | -0.57117 | -0.57117 | -0.50702 | -0.48434 | -0.3117  | -0.22919 | -0.22919 |
| -NA     | -1.38123 | -1.38123 | -1.3705  | -1.35381 | -1.34078 | -1.33931 | -1.33931 |
| 50nM+NA | 1.614224 | 1.614224 | 1.837646 | 2.271085 | 2.61454  | 2.616759 | 2.616759 |
| 5nM+NA  | -0.24742 | -0.24742 | -0.13259 | 0.185391 | 0.315088 | 0.329218 | 0.329218 |
| +NA     | -1.3785  | -1.3785  | -1.37362 | -1.33847 | -1.30696 | -1.29587 | -1.29587 |

### Oneway Anova

#### Summary of Fit

|                            |          |
|----------------------------|----------|
| Rsquare                    | 0.972048 |
| Adj Rsquare                | 0.96739  |
| Root Mean Square Error     | 0.2323   |
| Mean of Response           | -5.6e-10 |
| Observations (or Sum Wgts) | 36       |

#### Analysis of Variance

| Source   | DF | Sum of Squares | Mean Square | F Ratio  | Prob > F |
|----------|----|----------------|-------------|----------|----------|
| Label    | 5  | 56.298573      | 11.2597     | 208.6557 | <.0001 * |
| Error    | 30 | 1.618894       | 0.0540      |          |          |
| C. Total | 35 | 57.917466      |             |          |          |

#### Means for Oneway Anova

| Level   | Number | Mean    | Std Error | Lower 95% | Upper 95% |
|---------|--------|---------|-----------|-----------|-----------|
| 50nM-NA | 6      | 0.7994  | 0.09484   | 0.606     | 0.993     |
| 5nM-NA  | 6      | -0.4323 | 0.09484   | -0.626    | -0.239    |
| -NA     | 6      | -1.3561 | 0.09484   | -1.550    | -1.162    |
| 50nM+NA | 6      | 2.2165  | 0.09484   | 2.023     | 2.410     |
| 5nM+NA  | 6      | 0.1114  | 0.09484   | -0.082    | 0.305     |
| +NA     | 6      | -1.3390 | 0.09484   | -1.533    | -1.145    |

Std Error uses a pooled estimate of error variance

### Means Comparisons

#### Comparisons with a control using Dunnett's Method

### Oneway Analysis of serine By Label

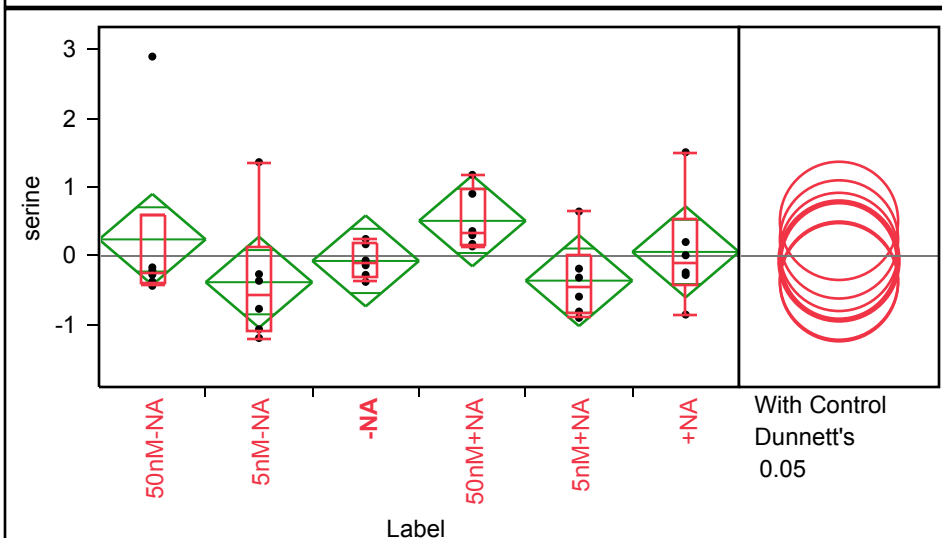

### Quantiles

| Level   | Minimum  | 10%      | 25%      | Median   | 75%      | 90%      | Maximum  |
|---------|----------|----------|----------|----------|----------|----------|----------|
| 50nM-NA | -0.4334  | -0.4334  | -0.38687 | -0.24036 | 0.599907 | 2.895512 | 2.895512 |
| 5nM-NA  | -1.19091 | -1.19091 | -1.09558 | -0.56369 | 0.143071 | 1.362679 | 1.362679 |
| -NA     | -0.37563 | -0.37563 | -0.29998 | -0.09951 | 0.189795 | 0.247586 | 0.247586 |
| 50nM+NA | 0.139118 | 0.139118 | 0.166225 | 0.332263 | 0.972137 | 1.178513 | 1.178513 |
| 5nM+NA  | -0.89818 | -0.89818 | -0.82955 | -0.45184 | 0.023427 | 0.645867 | 0.645867 |
| +NA     | -0.85081 | -0.85081 | -0.4191  | -0.11416 | 0.528842 | 1.506914 | 1.506914 |

### Oneway Anova

#### Summary of Fit

|                            |          |
|----------------------------|----------|
| Rsquare                    | 0.160773 |
| Adj Rsquare                | 0.020902 |
| Root Mean Square Error     | 0.791226 |
| Mean of Response           | 2.78e-10 |
| Observations (or Sum Wgts) | 36       |

#### Analysis of Variance

| Source   | DF | Sum of Squares | Mean Square | F Ratio | Prob > F |
|----------|----|----------------|-------------|---------|----------|
| Label    | 5  | 3.597966       | 0.719593    | 1.1494  | 0.3566   |
| Error    | 30 | 18.781177      | 0.626039    |         |          |
| C. Total | 35 | 22.379143      |             |         |          |

#### Means for Oneway Anova

| Level   | Number | Mean     | Std Error | Lower 95% | Upper 95% |
|---------|--------|----------|-----------|-----------|-----------|
| 50nM-NA | 6      | 0.24079  | 0.32302   | -0.419    | 0.9005    |
| 5nM-NA  | 6      | -0.38048 | 0.32302   | -1.040    | 0.2792    |
| -NA     | 6      | -0.07188 | 0.32302   | -0.732    | 0.5878    |
| 50nM+NA | 6      | 0.51013  | 0.32302   | -0.150    | 1.1698    |
| 5nM+NA  | 6      | -0.35779 | 0.32302   | -1.017    | 0.3019    |
| +NA     | 6      | 0.05923  | 0.32302   | -0.600    | 0.7189    |

Std Error uses a pooled estimate of error variance

### Means Comparisons

#### Comparisons with a control using Dunnett's Method

### Oneway Analysis of S-methyl-5-thioadenosine By Label

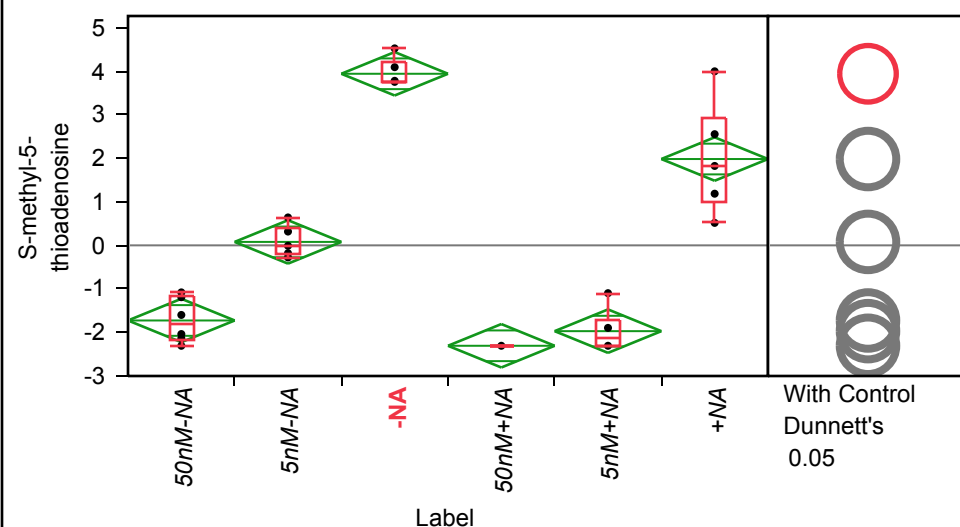

#### Quantiles

| Level   | Minimum  | 10%      | 25%      | Median   | 75%      | 90%      | Maximum  |
|---------|----------|----------|----------|----------|----------|----------|----------|
| 50nM-NA | -2.30605 | -2.30605 | -2.18061 | -1.81741 | -1.16312 | -1.08015 | -1.08015 |
| 5nM-NA  | -0.27768 | -0.27768 | -0.20465 | -0.01276 | 0.397849 | 0.64082  | 0.64082  |
| -NA     | 3.731959 | 3.731959 | 3.748611 | 3.769813 | 4.19938  | 4.52303  | 4.52303  |
| 50nM+NA | -2.30606 | -2.30606 | -2.30605 | -2.30604 | -2.30602 | -2.30602 | -2.30602 |
| 5nM+NA  | -2.30605 | -2.30605 | -2.30604 | -2.10787 | -1.69599 | -1.09813 | -1.09813 |
| +NA     | 0.516094 | 0.516094 | 1.018509 | 1.821133 | 2.913863 | 3.99621  | 3.99621  |

#### Oneway Anova

##### Summary of Fit

|                            |          |
|----------------------------|----------|
| Rsquare                    | 0.946489 |
| Adj Rsquare                | 0.93757  |
| Root Mean Square Error     | 0.598087 |
| Mean of Response           | -2.8e-10 |
| Observations (or Sum Wgts) | 36       |

##### Analysis of Variance

| Source   | DF | Sum of Squares | Mean Square | F Ratio  | Prob > F |
|----------|----|----------------|-------------|----------|----------|
| Label    | 5  | 189.81061      | 37.9621     | 106.1262 | <.0001 * |
| Error    | 30 | 10.73123       | 0.3577      |          |          |
| C. Total | 35 | 200.54183      |             |          |          |

##### Means for Oneway Anova

| Level   | Number | Mean    | Std Error | Lower 95% | Upper 95% |
|---------|--------|---------|-----------|-----------|-----------|
| 50nM-NA | 6      | -1.7251 | 0.24417   | -2.224    | -1.226    |
| 5nM-NA  | 6      | 0.0790  | 0.24417   | -0.420    | 0.578     |
| -NA     | 6      | 3.9400  | 0.24417   | 3.441     | 4.439     |
| 50nM+NA | 6      | -2.3060 | 0.24417   | -2.805    | -1.807    |
| 5nM+NA  | 6      | -1.9702 | 0.24417   | -2.469    | -1.472    |
| +NA     | 6      | 1.9823  | 0.24417   | 1.484     | 2.481     |

Std Error uses a pooled estimate of error variance

#### Means Comparisons

##### Comparisons with a control using Dunnett's Method

### Oneway Analysis of sn-glycerol-3-phosphate By Label

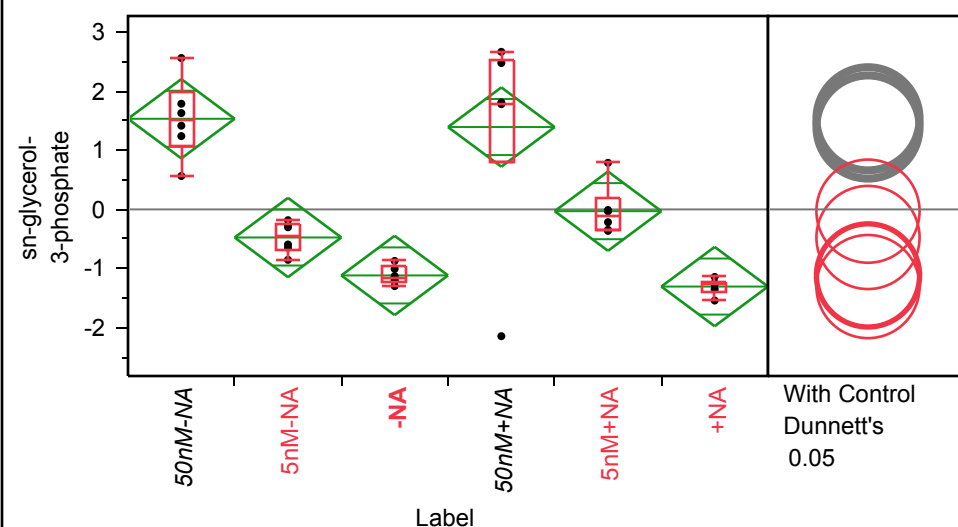

### Quantiles

| Level   | Minimum  | 10%      | 25%      | Median   | 75%      | 90%      | Maximum  |
|---------|----------|----------|----------|----------|----------|----------|----------|
| 50nM-NA | 0.565834 | 0.565834 | 1.072402 | 1.524288 | 1.982651 | 2.563416 | 2.563416 |
| 5nM-NA  | -0.85367 | -0.85367 | -0.69989 | -0.44836 | -0.24865 | -0.18271 | -0.18271 |
| -NA     | -1.29876 | -1.29876 | -1.23522 | -1.15687 | -0.97371 | -0.87299 | -0.87299 |
| 50nM+NA | -2.14679 | -2.14679 | 0.794685 | 1.796583 | 2.526011 | 2.667695 | 2.667695 |
| 5nM+NA  | -0.36287 | -0.36287 | -0.34981 | -0.12408 | 0.188988 | 0.788942 | 0.788942 |
| +NA     | -1.54324 | -1.54324 | -1.39936 | -1.27738 | -1.22013 | -1.1433  | -1.1433  |

### Oneway Anova

#### Summary of Fit

|                            |          |
|----------------------------|----------|
| Rsquare                    | 0.697787 |
| Adj Rsquare                | 0.647418 |
| Root Mean Square Error     | 0.805122 |
| Mean of Response           | 2.78e-10 |
| Observations (or Sum Wgts) | 36       |

#### Analysis of Variance

| Source   | DF | Sum of Squares | Mean Square | F Ratio | Prob > F |
|----------|----|----------------|-------------|---------|----------|
| Label    | 5  | 44.900765      | 8.98015     | 13.8535 | <.0001 * |
| Error    | 30 | 19.446658      | 0.64822     |         |          |
| C. Total | 35 | 64.347423      |             |         |          |

#### Means for Oneway Anova

| Level   | Number | Mean    | Std Error | Lower 95% | Upper 95% |
|---------|--------|---------|-----------|-----------|-----------|
| 50nM-NA | 6      | 1.5347  | 0.32869   | 0.863     | 2.206     |
| 5nM-NA  | 6      | -0.4754 | 0.32869   | -1.147    | 0.196     |
| -NA     | 6      | -1.1178 | 0.32869   | -1.789    | -0.447    |
| 50nM+NA | 6      | 1.3947  | 0.32869   | 0.723     | 2.066     |
| 5nM+NA  | 6      | -0.0298 | 0.32869   | -0.701    | 0.642     |
| +NA     | 6      | -1.3064 | 0.32869   | -1.978    | -0.635    |

Std Error uses a pooled estimate of error variance

### Means Comparisons

#### Comparisons with a control using Dunnett's Method

### Oneway Analysis of Spermidine By Label

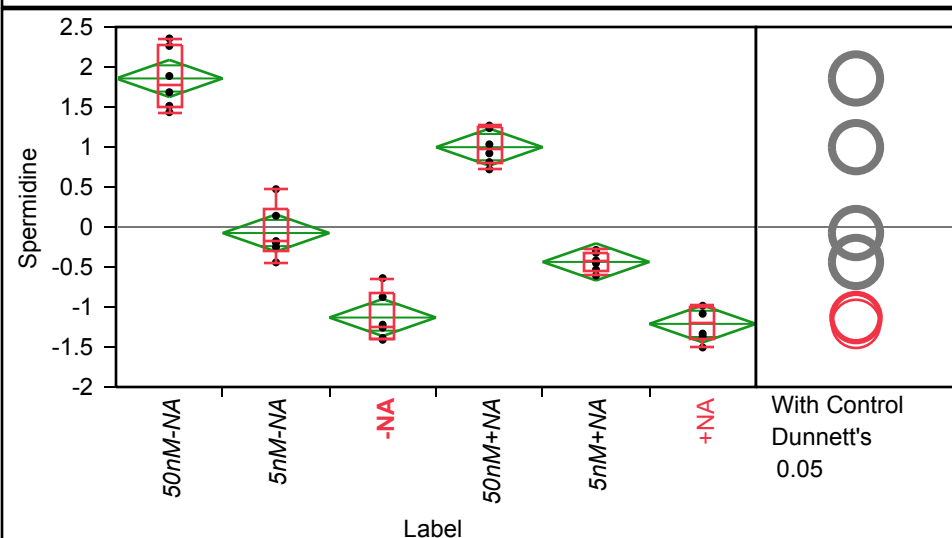

### Quantiles

| Level   | Minimum  | 10%      | 25%      | Median   | 75%      | 90%      | Maximum  |
|---------|----------|----------|----------|----------|----------|----------|----------|
| 50nM-NA | 1.434964 | 1.434964 | 1.494392 | 1.785927 | 2.286584 | 2.356894 | 2.356894 |
| 5nM-NA  | -0.44217 | -0.44217 | -0.29921 | -0.18602 | 0.223392 | 0.472794 | 0.472794 |
| -NA     | -1.40986 | -1.40986 | -1.3935  | -1.23949 | -0.81604 | -0.6392  | -0.6392  |
| 50nM+NA | 0.720422 | 0.720422 | 0.788359 | 0.976708 | 1.243664 | 1.267491 | 1.267491 |
| 5nM+NA  | -0.60722 | -0.60722 | -0.55163 | -0.43459 | -0.31423 | -0.28682 | -0.28682 |
| +NA     | -1.50593 | -1.50593 | -1.4034  | -1.2085  | -0.98784 | -0.98453 | -0.98453 |

### Oneway Anova

#### Summary of Fit

|                            |          |
|----------------------------|----------|
| Rsquare                    | 0.950266 |
| Adj Rsquare                | 0.941978 |
| Root Mean Square Error     | 0.278081 |
| Mean of Response           | -5.56e-9 |
| Observations (or Sum Wgts) | 36       |

#### Analysis of Variance

| Source   | DF | Sum of Squares | Mean Square | F Ratio  | Prob > F |
|----------|----|----------------|-------------|----------|----------|
| Label    | 5  | 44.325992      | 8.86520     | 114.6429 | <.0001 * |
| Error    | 30 | 2.319865       | 0.07733     |          |          |
| C. Total | 35 | 46.645857      |             |          |          |

#### Means for Oneway Anova

| Level   | Number | Mean    | Std Error | Lower 95% | Upper 95% |
|---------|--------|---------|-----------|-----------|-----------|
| 50nM-NA | 6      | 1.8568  | 0.11353   | 1.625     | 2.089     |
| 5nM-NA  | 6      | -0.0755 | 0.11353   | -0.307    | 0.156     |
| -NA     | 6      | -1.1318 | 0.11353   | -1.364    | -0.900    |
| 50nM+NA | 6      | 0.9980  | 0.11353   | 0.766     | 1.230     |
| 5nM+NA  | 6      | -0.4366 | 0.11353   | -0.668    | -0.205    |
| +NA     | 6      | -1.2109 | 0.11353   | -1.443    | -0.979    |

Std Error uses a pooled estimate of error variance

### Means Comparisons

#### Comparisons with a control using Dunnett's Method

### Oneway Analysis of Spermine By Label

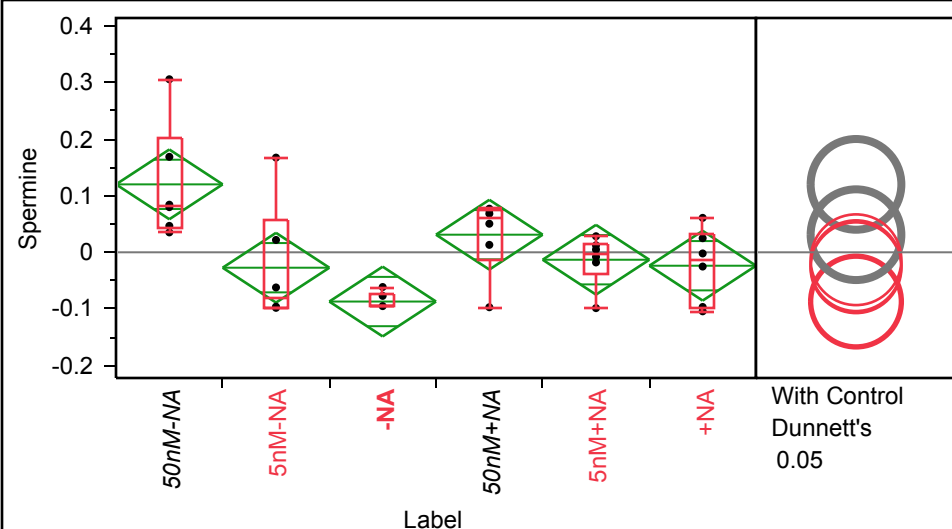

### Quantiles

| Level   | Minimum  | 10%      | 25%      | Median   | 75%      | 90%      | Maximum  |
|---------|----------|----------|----------|----------|----------|----------|----------|
| 50nM-NA | 0.035177 | 0.035177 | 0.043788 | 0.081927 | 0.202904 | 0.305657 | 0.305657 |
| 5nM-NA  | -0.0981  | -0.0981  | -0.09664 | -0.0791  | 0.058152 | 0.167246 | 0.167246 |
| -NA     | -0.09655 | -0.09655 | -0.09617 | -0.09552 | -0.07306 | -0.06135 | -0.06135 |
| 50nM+NA | -0.09707 | -0.09707 | -0.01441 | 0.059362 | 0.075349 | 0.077014 | 0.077014 |
| 5nM+NA  | -0.09861 | -0.09861 | -0.03808 | -0.00153 | 0.016335 | 0.028343 | 0.028343 |
| +NA     | -0.10425 | -0.10425 | -0.09852 | -0.01361 | 0.033895 | 0.060828 | 0.060828 |

### Oneway Anova

#### Summary of Fit

|                            |          |
|----------------------------|----------|
| Rsquare                    | 0.472232 |
| Adj Rsquare                | 0.38427  |
| Root Mean Square Error     | 0.07387  |
| Mean of Response           | -5.6e-11 |
| Observations (or Sum Wgts) | 36       |

#### Analysis of Variance

| Source   | DF | Sum of Squares | Mean Square | F Ratio | Prob > F |
|----------|----|----------------|-------------|---------|----------|
| Label    | 5  | 0.14647575     | 0.029295    | 5.3686  | 0.0012 * |
| Error    | 30 | 0.16370204     | 0.005457    |         |          |
| C. Total | 35 | 0.31017780     |             |         |          |

#### Means for Oneway Anova

| Level   | Number | Mean     | Std Error | Lower 95% | Upper 95% |
|---------|--------|----------|-----------|-----------|-----------|
| 50nM-NA | 6      | 0.12000  | 0.03016   | 0.0584    | 0.1816    |
| 5nM-NA  | 6      | -0.02724 | 0.03016   | -0.0888   | 0.0344    |
| -NA     | 6      | -0.08699 | 0.03016   | -0.1486   | -0.0254   |
| 50nM+NA | 6      | 0.03110  | 0.03016   | -0.0305   | 0.0927    |
| 5nM+NA  | 6      | -0.01315 | 0.03016   | -0.0747   | 0.0484    |
| +NA     | 6      | -0.02372 | 0.03016   | -0.0853   | 0.0379    |

Std Error uses a pooled estimate of error variance

### Means Comparisons

#### Comparisons with a control using Dunnett's Method

### Oneway Analysis of Stearic acid By Label

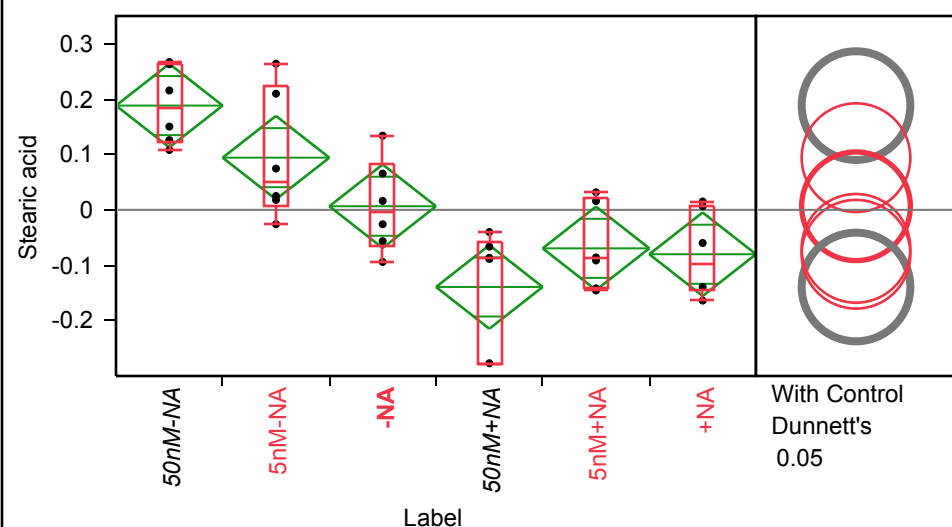

### Quantiles

| Level   | Minimum  | 10%      | 25%      | Median   | 75%      | 90%      | Maximum  |
|---------|----------|----------|----------|----------|----------|----------|----------|
| 50nM-NA | 0.108069 | 0.108069 | 0.12144  | 0.18293  | 0.263818 | 0.266905 | 0.266905 |
| 5nM-NA  | -0.02583 | -0.02583 | 0.007005 | 0.049741 | 0.223281 | 0.263878 | 0.263878 |
| -NA     | -0.09405 | -0.09405 | -0.06591 | -0.00494 | 0.082537 | 0.13394  | 0.13394  |
| 50nM+NA | -0.27702 | -0.27702 | -0.27694 | -0.0876  | -0.05975 | -0.04006 | -0.04006 |
| 5nM+NA  | -0.14554 | -0.14554 | -0.14274 | -0.08869 | 0.019883 | 0.031673 | 0.031673 |
| +NA     | -0.16379 | -0.16379 | -0.14577 | -0.09948 | 0.008597 | 0.015032 | 0.015032 |

### Oneway Anova

#### Summary of Fit

|                            |          |
|----------------------------|----------|
| Rsquare                    | 0.647079 |
| Adj Rsquare                | 0.588259 |
| Root Mean Square Error     | 0.090453 |
| Mean of Response           | -2.8e-11 |
| Observations (or Sum Wgts) | 36       |

#### Analysis of Variance

| Source   | DF | Sum of Squares | Mean Square | F Ratio | Prob > F |
|----------|----|----------------|-------------|---------|----------|
| Label    | 5  | 0.45003864     | 0.090008    | 11.0010 | <.0001 * |
| Error    | 30 | 0.24545372     | 0.008182    |         |          |
| C. Total | 35 | 0.69549236     |             |         |          |

#### Means for Oneway Anova

| Level   | Number | Mean     | Std Error | Lower 95% | Upper 95% |
|---------|--------|----------|-----------|-----------|-----------|
| 50nM-NA | 6      | 0.18825  | 0.03693   | 0.1128    | 0.2637    |
| 5nM-NA  | 6      | 0.09420  | 0.03693   | 0.0188    | 0.1696    |
| -NA     | 6      | 0.00648  | 0.03693   | -0.0689   | 0.0819    |
| 50nM+NA | 6      | -0.13925 | 0.03693   | -0.2147   | -0.0638   |
| 5nM+NA  | 6      | -0.06952 | 0.03693   | -0.1449   | 0.0059    |
| +NA     | 6      | -0.08017 | 0.03693   | -0.1556   | -0.0048   |

Std Error uses a pooled estimate of error variance

### Means Comparisons

#### Comparisons with a control using Dunnett's Method

### Oneway Analysis of succinate By Label

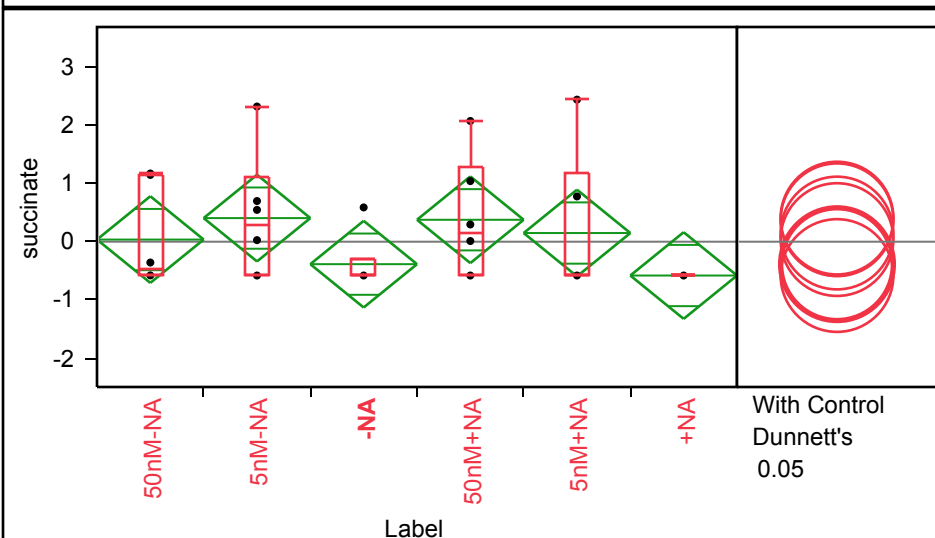

### Quantiles

| Level   | Minimum  | 10%      | 25%      | Median   | 75%      | 90%      | Maximum  |
|---------|----------|----------|----------|----------|----------|----------|----------|
| 50nM-NA | -0.5814  | -0.5814  | -0.58129 | -0.46866 | 1.153699 | 1.171845 | 1.171845 |
| 5nM-NA  | -0.58119 | -0.58119 | -0.58118 | 0.286904 | 1.104726 | 2.322371 | 2.322371 |
| -NA     | -0.58128 | -0.58128 | -0.58122 | -0.58117 | -0.28865 | 0.588637 | 0.588637 |
| 50nM+NA | -0.58133 | -0.58133 | -0.58133 | 0.153704 | 1.299436 | 2.074219 | 2.074219 |
| 5nM+NA  | -0.5814  | -0.5814  | -0.58137 | -0.58121 | 1.193406 | 2.441066 | 2.441066 |
| +NA     | -0.58203 | -0.58203 | -0.5816  | -0.58126 | -0.58124 | -0.58123 | -0.58123 |

### Oneway Anova

#### Summary of Fit

|                            |          |
|----------------------------|----------|
| Rsquare                    | 0.170113 |
| Adj Rsquare                | 0.031798 |
| Root Mean Square Error     | 0.89282  |
| Mean of Response           | 8.33e-10 |
| Observations (or Sum Wgts) | 36       |

#### Analysis of Variance

| Source   | DF | Sum of Squares | Mean Square | F Ratio | Prob > F |
|----------|----|----------------|-------------|---------|----------|
| Label    | 5  | 4.901921       | 0.980384    | 1.2299  | 0.3197   |
| Error    | 30 | 23.913835      | 0.797128    |         |          |
| C. Total | 35 | 28.815755      |             |         |          |

#### Means for Oneway Anova

| Level   | Number | Mean     | Std Error | Lower 95% | Upper 95% |
|---------|--------|----------|-----------|-----------|-----------|
| 50nM-NA | 6      | 0.03659  | 0.36449   | -0.708    | 0.7810    |
| 5nM-NA  | 6      | 0.40544  | 0.36449   | -0.339    | 1.1498    |
| -NA     | 6      | -0.38621 | 0.36449   | -1.131    | 0.3582    |
| 50nM+NA | 6      | 0.37669  | 0.36449   | -0.368    | 1.1211    |
| 5nM+NA  | 6      | 0.14890  | 0.36449   | -0.595    | 0.8933    |
| +NA     | 6      | -0.58141 | 0.36449   | -1.326    | 0.1630    |

Std Error uses a pooled estimate of error variance

### Means Comparisons

#### Comparisons with a control using Dunnett's Method

### Oneway Analysis of succinyl-CoA By Label

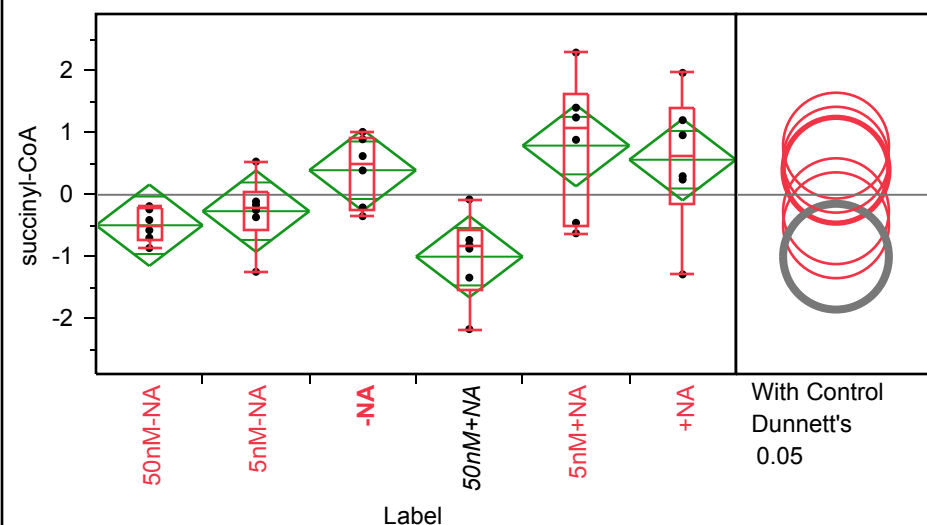

### Quantiles

| Level   | Minimum  | 10%      | 25%      | Median   | 75%      | 90%      | Maximum  |
|---------|----------|----------|----------|----------|----------|----------|----------|
| 50nM-NA | -0.85943 | -0.85943 | -0.7351  | -0.48941 | -0.22215 | -0.18394 | -0.18394 |
| 5nM-NA  | -1.24289 | -1.24289 | -0.58203 | -0.20545 | 0.05241  | 0.535638 | 0.535638 |
| -NA     | -0.34566 | -0.34566 | -0.24001 | 0.508779 | 0.92531  | 1.01415  | 1.01415  |
| 50nM+NA | -2.16759 | -2.16759 | -1.54458 | -0.8411  | -0.56554 | -0.07508 | -0.07508 |
| 5nM+NA  | -0.6216  | -0.6216  | -0.49486 | 1.066945 | 1.627643 | 2.294303 | 2.294303 |
| +NA     | -1.28477 | -1.28477 | -0.13727 | 0.630904 | 1.394883 | 1.967444 | 1.967444 |

### Oneway Anova

#### Summary of Fit

|                            |          |
|----------------------------|----------|
| Rsquare                    | 0.438335 |
| Adj Rsquare                | 0.344725 |
| Root Mean Square Error     | 0.786697 |
| Mean of Response           | 8.33e-10 |
| Observations (or Sum Wgts) | 36       |

#### Analysis of Variance

| Source   | DF | Sum of Squares | Mean Square | F Ratio | Prob > F |
|----------|----|----------------|-------------|---------|----------|
| Label    | 5  | 14.489902      | 2.89798     | 4.6825  | 0.0028 * |
| Error    | 30 | 18.566759      | 0.61889     |         |          |
| C. Total | 35 | 33.056662      |             |         |          |

#### Means for Oneway Anova

| Level   | Number | Mean     | Std Error | Lower 95% | Upper 95% |
|---------|--------|----------|-----------|-----------|-----------|
| 50nM-NA | 6      | -0.49179 | 0.32117   | -1.148    | 0.164     |
| 5nM-NA  | 6      | -0.26476 | 0.32117   | -0.921    | 0.391     |
| -NA     | 6      | 0.39616  | 0.32117   | -0.260    | 1.052     |
| 50nM+NA | 6      | -0.99847 | 0.32117   | -1.654    | -0.343    |
| 5nM+NA  | 6      | 0.79323  | 0.32117   | 0.137     | 1.449     |
| +NA     | 6      | 0.56562  | 0.32117   | -0.090    | 1.222     |

Std Error uses a pooled estimate of error variance

### Means Comparisons

#### Comparisons with a control using Dunnett's Method

### Oneway Analysis of taurine By Label

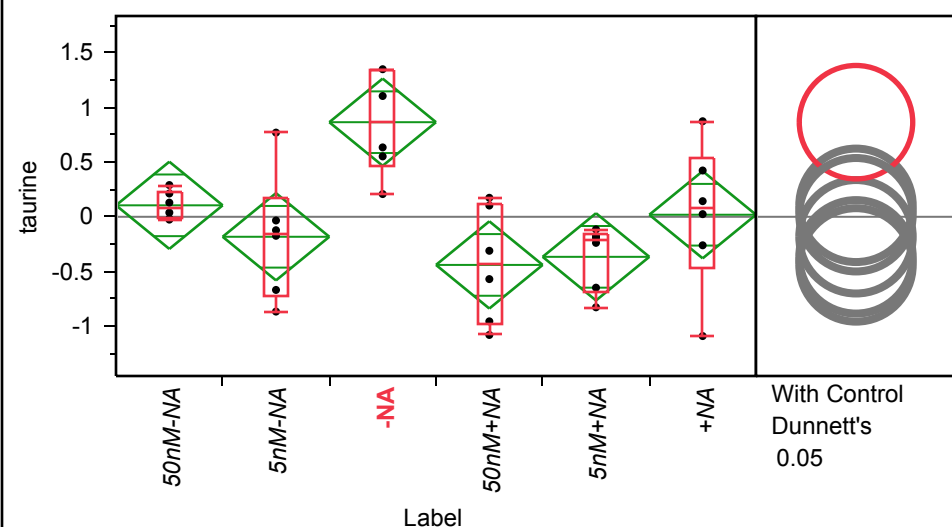

### Quantiles

| Level   | Minimum  | 10%      | 25%      | Median   | 75%      | 90%      | Maximum  |
|---------|----------|----------|----------|----------|----------|----------|----------|
| 50nM-NA | -0.02562 | -0.02562 | -0.01814 | 0.0839   | 0.232259 | 0.290243 | 0.290243 |
| 5nM-NA  | -0.86663 | -0.86663 | -0.71823 | -0.1483  | 0.167176 | 0.769805 | 0.769805 |
| -NA     | 0.207857 | 0.207857 | 0.466182 | 0.869531 | 1.343458 | 1.349467 | 1.349467 |
| 50nM+NA | -1.08042 | -1.08042 | -0.98722 | -0.44024 | 0.120682 | 0.173723 | 0.173723 |
| 5nM+NA  | -0.82758 | -0.82758 | -0.69308 | -0.21467 | -0.16099 | -0.11526 | -0.11526 |
| +NA     | -1.09056 | -1.09056 | -0.46814 | 0.083642 | 0.535911 | 0.873678 | 0.873678 |

### Oneway Anova

#### Summary of Fit

|                            |          |
|----------------------------|----------|
| Rsquare                    | 0.494985 |
| Adj Rsquare                | 0.410815 |
| Root Mean Square Error     | 0.478203 |
| Mean of Response           | -2.8e-10 |
| Observations (or Sum Wgts) | 36       |

#### Analysis of Variance

| Source   | DF | Sum of Squares | Mean Square | F Ratio | Prob > F |
|----------|----|----------------|-------------|---------|----------|
| Label    | 5  | 6.724081       | 1.34482     | 5.8808  | 0.0007 * |
| Error    | 30 | 6.860341       | 0.22868     |         |          |
| C. Total | 35 | 13.584421      |             |         |          |

#### Means for Oneway Anova

| Level   | Number | Mean     | Std Error | Lower 95% | Upper 95% |
|---------|--------|----------|-----------|-----------|-----------|
| 50nM-NA | 6      | 0.10495  | 0.19523   | -0.2938   | 0.504     |
| 5nM-NA  | 6      | -0.18265 | 0.19523   | -0.5814   | 0.216     |
| -NA     | 6      | 0.86502  | 0.19523   | 0.4663    | 1.264     |
| 50nM+NA | 6      | -0.44006 | 0.19523   | -0.8388   | -0.041    |
| 5nM+NA  | 6      | -0.36611 | 0.19523   | -0.7648   | 0.033     |
| +NA     | 6      | 0.01884  | 0.19523   | -0.3799   | 0.418     |

Std Error uses a pooled estimate of error variance

### Means Comparisons

#### Comparisons with a control using Dunnett's Method

### Oneway Analysis of Taurodeoxycholic acid By Label

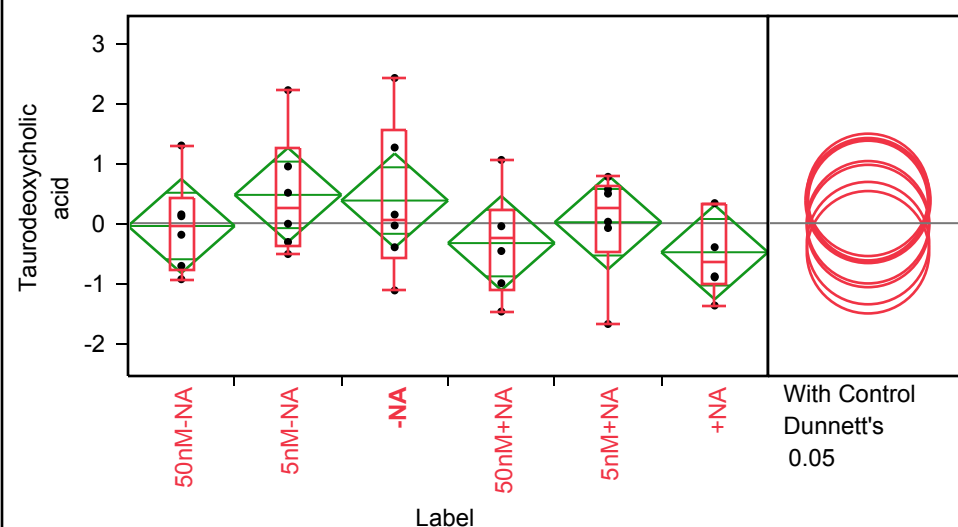

### Quantiles

| Level   | Minimum  | 10%      | 25%      | Median   | 75%      | 90%      | Maximum  |
|---------|----------|----------|----------|----------|----------|----------|----------|
| 50nM-NA | -0.93338 | -0.93338 | -0.76706 | -0.03853 | 0.432708 | 1.293274 | 1.293274 |
| 5nM-NA  | -0.51455 | -0.51455 | -0.36362 | 0.248243 | 1.261925 | 2.214313 | 2.214313 |
| -NA     | -1.1201  | -1.1201  | -0.581   | 0.052118 | 1.54917  | 2.417607 | 2.417607 |
| 50nM+NA | -1.47195 | -1.47195 | -1.11775 | -0.26076 | 0.224845 | 1.052753 | 1.052753 |
| 5nM+NA  | -1.67941 | -1.67941 | -0.4802  | 0.257736 | 0.61678  | 0.771452 | 0.771452 |
| +NA     | -1.37149 | -1.37149 | -1.01958 | -0.64287 | 0.323724 | 0.333762 | 0.333762 |

### Oneway Anova

#### Summary of Fit

|                            |          |
|----------------------------|----------|
| Rsquare                    | 0.138797 |
| Adj Rsquare                | -0.00474 |
| Root Mean Square Error     | 0.939363 |
| Mean of Response           | -5.6e-11 |
| Observations (or Sum Wgts) | 36       |

#### Analysis of Variance

| Source   | DF | Sum of Squares | Mean Square | F Ratio | Prob > F |
|----------|----|----------------|-------------|---------|----------|
| Label    | 5  | 4.266399       | 0.853280    | 0.9670  | 0.4536   |
| Error    | 30 | 26.472105      | 0.882404    |         |          |
| C. Total | 35 | 30.738505      |             |         |          |

#### Means for Oneway Anova

| Level   | Number | Mean     | Std Error | Lower 95% | Upper 95% |
|---------|--------|----------|-----------|-----------|-----------|
| 50nM-NA | 6      | -0.04716 | 0.38349   | -0.830    | 0.7360    |
| 5nM-NA  | 6      | 0.47123  | 0.38349   | -0.312    | 1.2544    |
| -NA     | 6      | 0.37669  | 0.38349   | -0.407    | 1.1599    |
| 50nM+NA | 6      | -0.33192 | 0.38349   | -1.115    | 0.4513    |
| 5nM+NA  | 6      | 0.01538  | 0.38349   | -0.768    | 0.7986    |
| +NA     | 6      | -0.48423 | 0.38349   | -1.267    | 0.2990    |

Std Error uses a pooled estimate of error variance

### Means Comparisons

#### Comparisons with a control using Dunnett's Method

### Oneway Analysis of thiamine By Label

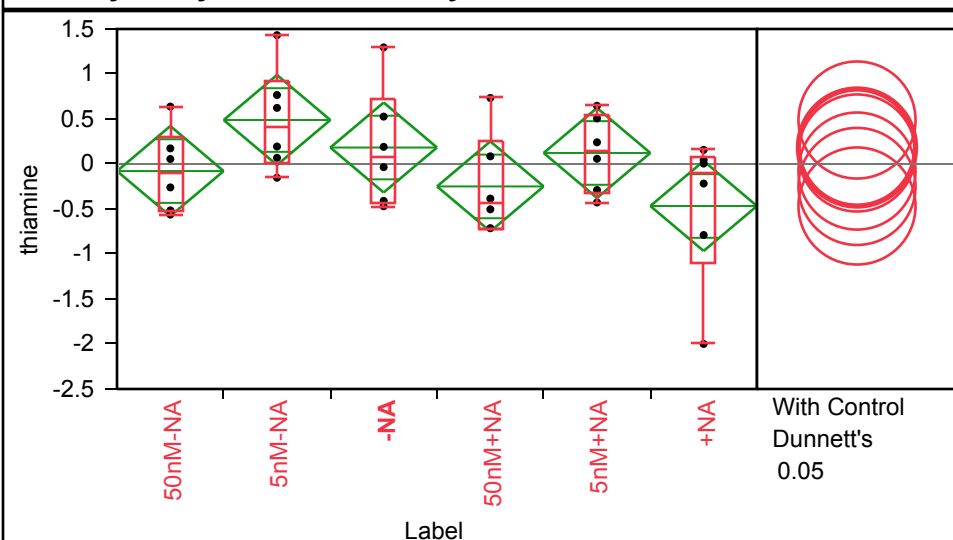

### Quantiles

| Level   | Minimum  | 10%      | 25%      | Median   | 75%      | 90%      | Maximum  |
|---------|----------|----------|----------|----------|----------|----------|----------|
| 50nM-NA | -0.56206 | -0.56206 | -0.5271  | -0.10237 | 0.289659 | 0.637949 | 0.637949 |
| 5nM-NA  | -0.15249 | -0.15249 | 0.013563 | 0.408701 | 0.93275  | 1.431363 | 1.431363 |
| -NA     | -0.46981 | -0.46981 | -0.42452 | 0.07764  | 0.718954 | 1.295683 | 1.295683 |
| 50nM+NA | -0.71366 | -0.71366 | -0.713   | -0.44395 | 0.247378 | 0.733857 | 0.733857 |
| 5nM+NA  | -0.42732 | -0.42732 | -0.32374 | 0.149526 | 0.541473 | 0.646879 | 0.646879 |
| +NA     | -1.99922 | -1.99922 | -1.09167 | -0.10638 | 0.07247  | 0.156909 | 0.156909 |

### Oneway Anova

#### Summary of Fit

|                            |          |
|----------------------------|----------|
| Rsquare                    | 0.241865 |
| Adj Rsquare                | 0.115509 |
| Root Mean Square Error     | 0.599519 |
| Mean of Response           | -8.3e-11 |
| Observations (or Sum Wgts) | 36       |

#### Analysis of Variance

| Source   | DF | Sum of Squares | Mean Square | F Ratio | Prob > F |
|----------|----|----------------|-------------|---------|----------|
| Label    | 5  | 3.439965       | 0.687993    | 1.9142  | 0.1214   |
| Error    | 30 | 10.782693      | 0.359423    |         |          |
| C. Total | 35 | 14.222658      |             |         |          |

#### Means for Oneway Anova

| Level   | Number | Mean     | Std Error | Lower 95% | Upper 95% |
|---------|--------|----------|-----------|-----------|-----------|
| 50nM-NA | 6      | -0.07845 | 0.24475   | -0.5783   | 0.42140   |
| 5nM-NA  | 6      | 0.48862  | 0.24475   | -0.0112   | 0.98847   |
| -NA     | 6      | 0.18307  | 0.24475   | -0.3168   | 0.68292   |
| 50nM+NA | 6      | -0.24921 | 0.24475   | -0.7491   | 0.25064   |
| 5nM+NA  | 6      | 0.12262  | 0.24475   | -0.3772   | 0.62247   |
| +NA     | 6      | -0.46665 | 0.24475   | -0.9665   | 0.03320   |

Std Error uses a pooled estimate of error variance

### Means Comparisons

#### Comparisons with a control using Dunnett's Method

### Oneway Analysis of Thiamine pyrophosphate By Label

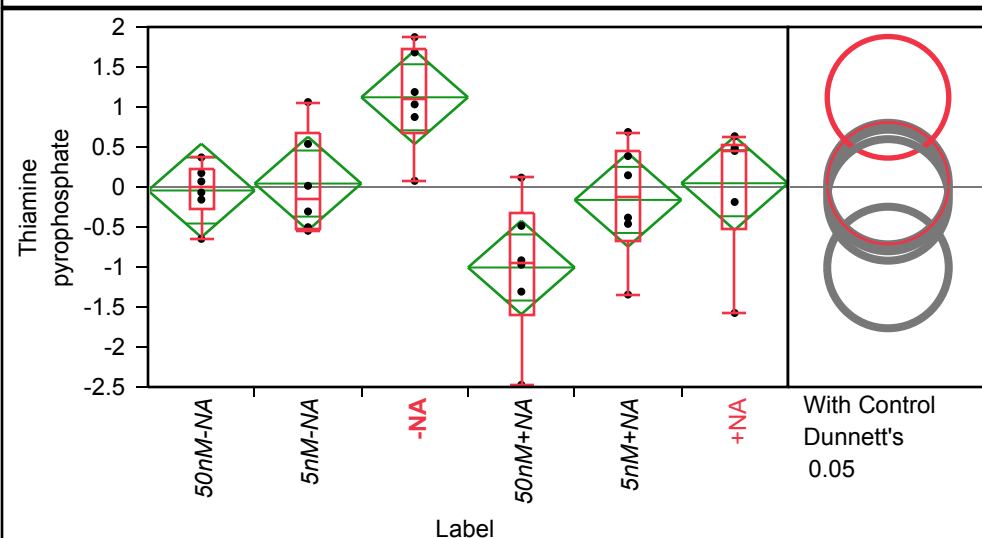

### Quantiles

| Level   | Minimum  | 10%      | 25%      | Median   | 75%      | 90%      | Maximum  |
|---------|----------|----------|----------|----------|----------|----------|----------|
| 50nM-NA | -0.64848 | -0.64848 | -0.28078 | 0.000494 | 0.222773 | 0.369871 | 0.369871 |
| 5nM-NA  | -0.5476  | -0.5476  | -0.514   | -0.14576 | 0.669296 | 1.061585 | 1.061585 |
| -NA     | 0.076468 | 0.076468 | 0.675339 | 1.110067 | 1.730078 | 1.873801 | 1.873801 |
| 50nM+NA | -2.473   | -2.473   | -1.59925 | -0.94374 | -0.33531 | 0.116909 | 0.116909 |
| 5nM+NA  | -1.34461 | -1.34461 | -0.68207 | -0.1181  | 0.461731 | 0.687201 | 0.687201 |
| +NA     | -1.5749  | -1.5749  | -0.53406 | 0.460211 | 0.525736 | 0.634288 | 0.634288 |

### Oneway Anova

#### Summary of Fit

|                            |          |
|----------------------------|----------|
| Rsquare                    | 0.484167 |
| Adj Rsquare                | 0.398195 |
| Root Mean Square Error     | 0.700336 |
| Mean of Response           | 2.78e-10 |
| Observations (or Sum Wgts) | 36       |

#### Analysis of Variance

| Source   | DF | Sum of Squares | Mean Square | F Ratio | Prob > F |
|----------|----|----------------|-------------|---------|----------|
| Label    | 5  | 13.810865      | 2.76217     | 5.6317  | 0.0009 * |
| Error    | 30 | 14.714111      | 0.49047     |         |          |
| C. Total | 35 | 28.524976      |             |         |          |

#### Means for Oneway Anova

| Level   | Number | Mean    | Std Error | Lower 95% | Upper 95% |
|---------|--------|---------|-----------|-----------|-----------|
| 50nM-NA | 6      | -0.0437 | 0.28591   | -0.628    | 0.540     |
| 5nM-NA  | 6      | 0.0430  | 0.28591   | -0.541    | 0.627     |
| -NA     | 6      | 1.1213  | 0.28591   | 0.537     | 1.705     |
| 50nM+NA | 6      | -1.0063 | 0.28591   | -1.590    | -0.422    |
| 5nM+NA  | 6      | -0.1614 | 0.28591   | -0.745    | 0.423     |
| +NA     | 6      | 0.0470  | 0.28591   | -0.537    | 0.631     |

Std Error uses a pooled estimate of error variance

### Means Comparisons

#### Comparisons with a control using Dunnett's Method

### Oneway Analysis of threonine By Label

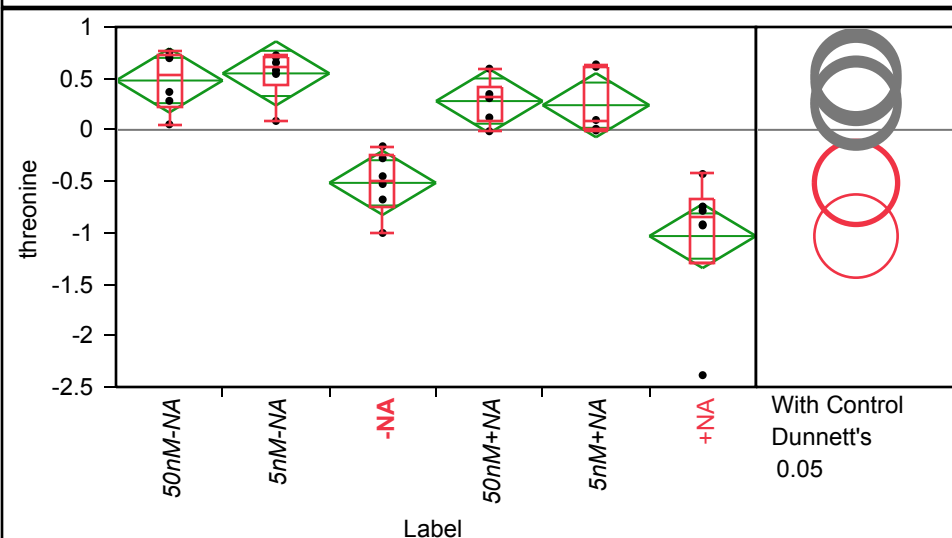

### Quantiles

| Level   | Minimum  | 10%      | 25%      | Median   | 75%      | 90%      | Maximum  |
|---------|----------|----------|----------|----------|----------|----------|----------|
| 50nM-NA | 0.053458 | 0.053458 | 0.225107 | 0.53281  | 0.728416 | 0.757369 | 0.757369 |
| 5nM-NA  | 0.086544 | 0.086544 | 0.429257 | 0.616072 | 0.710496 | 0.725106 | 0.725106 |
| -NA     | -1.00226 | -1.00226 | -0.7584  | -0.48866 | -0.24713 | -0.15946 | -0.15946 |
| 50nM+NA | -0.01363 | -0.01363 | 0.08704  | 0.314368 | 0.409646 | 0.594901 | 0.594901 |
| 5nM+NA  | -0.00582 | -0.00582 | 0.006397 | 0.092446 | 0.618658 | 0.636386 | 0.636386 |
| +NA     | -2.38491 | -2.38491 | -1.29329 | -0.853   | -0.66652 | -0.42913 | -0.42913 |

### Oneway Anova

#### Summary of Fit

|                            |          |
|----------------------------|----------|
| Rsquare                    | 0.741686 |
| Adj Rsquare                | 0.698633 |
| Root Mean Square Error     | 0.373126 |
| Mean of Response           | 0        |
| Observations (or Sum Wgts) | 36       |

#### Analysis of Variance

| Source   | DF | Sum of Squares | Mean Square | F Ratio | Prob > F |
|----------|----|----------------|-------------|---------|----------|
| Label    | 5  | 11.992300      | 2.39846     | 17.2275 | <.0001 * |
| Error    | 30 | 4.176681       | 0.13922     |         |          |
| C. Total | 35 | 16.168982      |             |         |          |

#### Means for Oneway Anova

| Level   | Number | Mean    | Std Error | Lower 95% | Upper 95% |
|---------|--------|---------|-----------|-----------|-----------|
| 50nM-NA | 6      | 0.4796  | 0.15233   | 0.168     | 0.7907    |
| 5nM-NA  | 6      | 0.5488  | 0.15233   | 0.238     | 0.8599    |
| -NA     | 6      | -0.5154 | 0.15233   | -0.827    | -0.2043   |
| 50nM+NA | 6      | 0.2798  | 0.15233   | -0.031    | 0.5908    |
| 5nM+NA  | 6      | 0.2398  | 0.15233   | -0.071    | 0.5509    |
| +NA     | 6      | -1.0325 | 0.15233   | -1.344    | -0.7214   |

Std Error uses a pooled estimate of error variance

### Means Comparisons

#### Comparisons with a control using Dunnett's Method

### Oneway Analysis of thymidine By Label

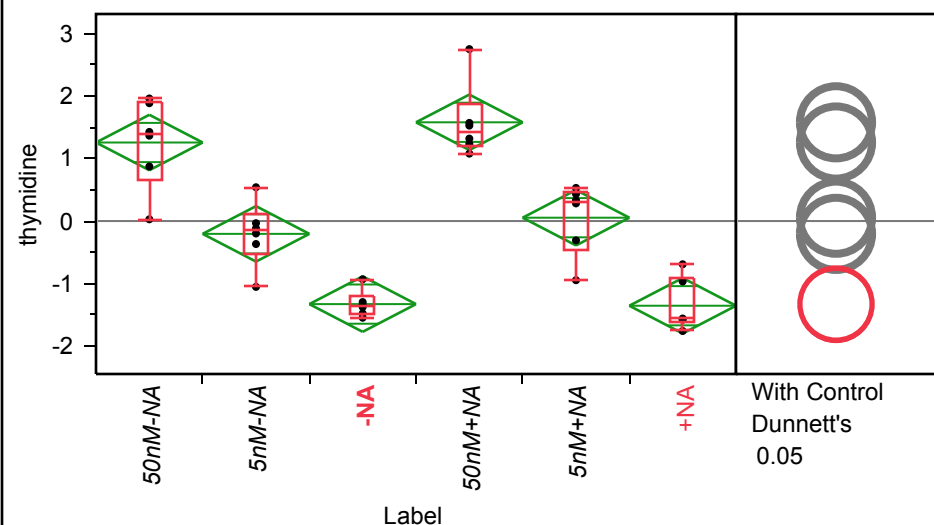

### Quantiles

| Level   | Minimum  | 10%      | 25%      | Median   | 75%      | 90%      | Maximum  |
|---------|----------|----------|----------|----------|----------|----------|----------|
| 50nM-NA | 0.027931 | 0.027931 | 0.660207 | 1.392875 | 1.900162 | 1.956319 | 1.956319 |
| 5nM-NA  | -1.05133 | -1.05133 | -0.53807 | -0.15807 | 0.109302 | 0.53946  | 0.53946  |
| -NA     | -1.54346 | -1.54346 | -1.49215 | -1.35744 | -1.20301 | -0.93014 | -0.93014 |
| 50nM+NA | 1.076407 | 1.076407 | 1.192145 | 1.419719 | 1.861351 | 2.744561 | 2.744561 |
| 5nM+NA  | -0.94463 | -0.94463 | -0.46787 | 0.306041 | 0.456214 | 0.52888  | 0.52888  |
| +NA     | -1.75543 | -1.75543 | -1.62052 | -1.56368 | -0.89598 | -0.69047 | -0.69047 |

### Oneway Anova

#### Summary of Fit

|                            |          |
|----------------------------|----------|
| Rsquare                    | 0.845018 |
| Adj Rsquare                | 0.819187 |
| Root Mean Square Error     | 0.531076 |
| Mean of Response           | 5.56e-10 |
| Observations (or Sum Wgts) | 36       |

#### Analysis of Variance

| Source   | DF | Sum of Squares | Mean Square | F Ratio | Prob > F |
|----------|----|----------------|-------------|---------|----------|
| Label    | 5  | 46.133648      | 9.22673     | 32.7141 | <.0001 * |
| Error    | 30 | 8.461249       | 0.28204     |         |          |
| C. Total | 35 | 54.594897      |             |         |          |

#### Means for Oneway Anova

| Level   | Number | Mean    | Std Error | Lower 95% | Upper 95% |
|---------|--------|---------|-----------|-----------|-----------|
| 50nM-NA | 6      | 1.2537  | 0.21681   | 0.811     | 1.697     |
| 5nM-NA  | 6      | -0.2048 | 0.21681   | -0.648    | 0.238     |
| -NA     | 6      | -1.3262 | 0.21681   | -1.769    | -0.883    |
| 50nM+NA | 6      | 1.5763  | 0.21681   | 1.134     | 2.019     |
| 5nM+NA  | 6      | 0.0532  | 0.21681   | -0.390    | 0.496     |
| +NA     | 6      | -1.3522 | 0.21681   | -1.795    | -0.909    |

Std Error uses a pooled estimate of error variance

### Means Comparisons

#### Comparisons with a control using Dunnett's Method

### Oneway Analysis of tryptophan By Label

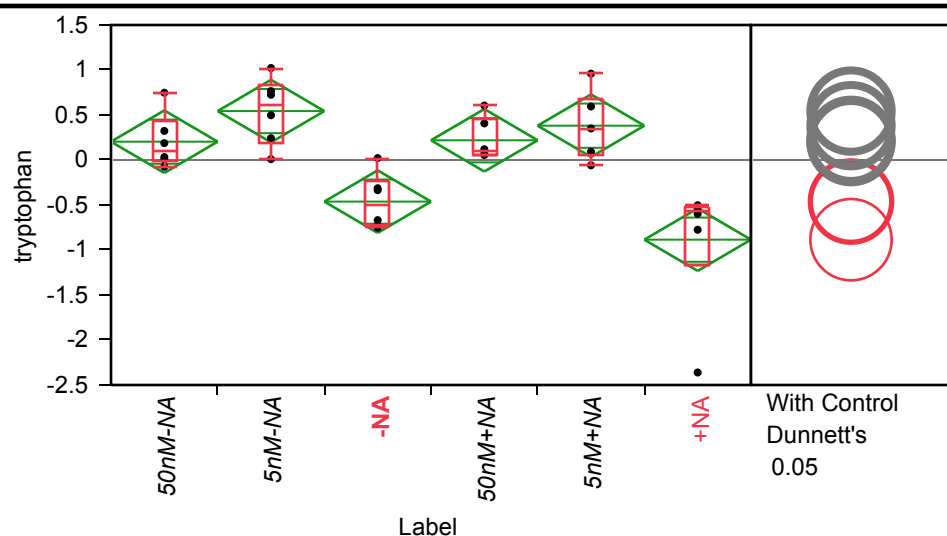

### Quantiles

| Level   | Minimum  | 10%      | 25%      | Median   | 75%      | 90%      | Maximum  |
|---------|----------|----------|----------|----------|----------|----------|----------|
| 50nM-NA | -0.0751  | -0.0751  | -0.01395 | 0.109927 | 0.428962 | 0.747655 | 0.747655 |
| 5nM-NA  | 0.00905  | 0.00905  | 0.183872 | 0.611294 | 0.829548 | 1.021918 | 1.021918 |
| -NA     | -0.75257 | -0.75257 | -0.73199 | -0.50173 | -0.22993 | 0.021553 | 0.021553 |
| 50nM+NA | 0.0551   | 0.0551   | 0.058743 | 0.094001 | 0.456159 | 0.605219 | 0.605219 |
| 5nM+NA  | -0.05935 | -0.05935 | 0.054115 | 0.35061  | 0.685647 | 0.959398 | 0.959398 |
| +NA     | -2.36114 | -2.36114 | -1.17166 | -0.56908 | -0.52669 | -0.50247 | -0.50247 |

### Oneway Anova

#### Summary of Fit

|                            |          |
|----------------------------|----------|
| Rsquare                    | 0.637863 |
| Adj Rsquare                | 0.577506 |
| Root Mean Square Error     | 0.416482 |
| Mean of Response           | -2.8e-11 |
| Observations (or Sum Wgts) | 36       |

#### Analysis of Variance

| Source   | DF | Sum of Squares | Mean Square | F Ratio | Prob > F |
|----------|----|----------------|-------------|---------|----------|
| Label    | 5  | 9.165748       | 1.83315     | 10.5683 | <.0001 * |
| Error    | 30 | 5.203724       | 0.17346     |         |          |
| C. Total | 35 | 14.369472      |             |         |          |

#### Means for Oneway Anova

| Level   | Number | Mean     | Std Error | Lower 95% | Upper 95% |
|---------|--------|----------|-----------|-----------|-----------|
| 50nM-NA | 6      | 0.20360  | 0.17003   | -0.144    | 0.5508    |
| 5nM-NA  | 6      | 0.54352  | 0.17003   | 0.196     | 0.8908    |
| -NA     | 6      | -0.46223 | 0.17003   | -0.809    | -0.1150   |
| 50nM+NA | 6      | 0.21913  | 0.17003   | -0.128    | 0.5664    |
| 5nM+NA  | 6      | 0.38127  | 0.17003   | 0.034     | 0.7285    |
| +NA     | 6      | -0.88528 | 0.17003   | -1.233    | -0.5380   |

Std Error uses a pooled estimate of error variance

### Means Comparisons

#### Comparisons with a control using Dunnett's Method

### Oneway Analysis of tyrosine By Label

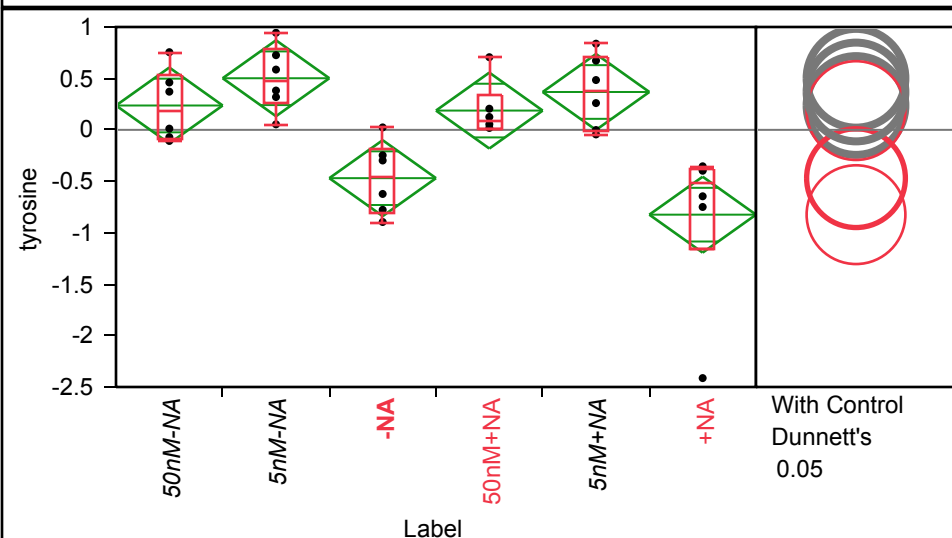

### Quantiles

| Level   | Minimum  | 10%      | 25%      | Median   | 75%      | 90%      | Maximum  |
|---------|----------|----------|----------|----------|----------|----------|----------|
| 50nM-NA | -0.10749 | -0.10749 | -0.07993 | 0.191518 | 0.534315 | 0.755137 | 0.755137 |
| 5nM-NA  | 0.053672 | 0.053672 | 0.252766 | 0.484107 | 0.780514 | 0.943725 | 0.943725 |
| -NA     | -0.89588 | -0.89588 | -0.80697 | -0.46044 | -0.17969 | 0.023672 | 0.023672 |
| 50nM+NA | 0.015703 | 0.015703 | 0.017824 | 0.089417 | 0.330702 | 0.706266 | 0.706266 |
| 5nM+NA  | -0.04434 | -0.04434 | -0.01247 | 0.372257 | 0.714031 | 0.837656 | 0.837656 |
| +NA     | -2.41347 | -2.41347 | -1.16566 | -0.52164 | -0.3784  | -0.35438 | -0.35438 |

### Oneway Anova

#### Summary of Fit

|                            |          |
|----------------------------|----------|
| Rsquare                    | 0.584718 |
| Adj Rsquare                | 0.515504 |
| Root Mean Square Error     | 0.442582 |
| Mean of Response           | -5.6e-10 |
| Observations (or Sum Wgts) | 36       |

#### Analysis of Variance

| Source   | DF | Sum of Squares | Mean Square | F Ratio | Prob > F |
|----------|----|----------------|-------------|---------|----------|
| Label    | 5  | 8.273931       | 1.65479     | 8.4480  | <.0001 * |
| Error    | 30 | 5.876359       | 0.19588     |         |          |
| C. Total | 35 | 14.150290      |             |         |          |

#### Means for Oneway Anova

| Level   | Number | Mean     | Std Error | Lower 95% | Upper 95% |
|---------|--------|----------|-----------|-----------|-----------|
| 50nM-NA | 6      | 0.23678  | 0.18068   | -0.132    | 0.6058    |
| 5nM-NA  | 6      | 0.50181  | 0.18068   | 0.133     | 0.8708    |
| -NA     | 6      | -0.46965 | 0.18068   | -0.839    | -0.1006   |
| 50nM+NA | 6      | 0.18747  | 0.18068   | -0.182    | 0.5565    |
| 5nM+NA  | 6      | 0.36814  | 0.18068   | -0.0009   | 0.7371    |
| +NA     | 6      | -0.82454 | 0.18068   | -1.194    | -0.4555   |

Std Error uses a pooled estimate of error variance

### Means Comparisons

#### Comparisons with a control using Dunnett's Method

### Oneway Analysis of UDP By Label

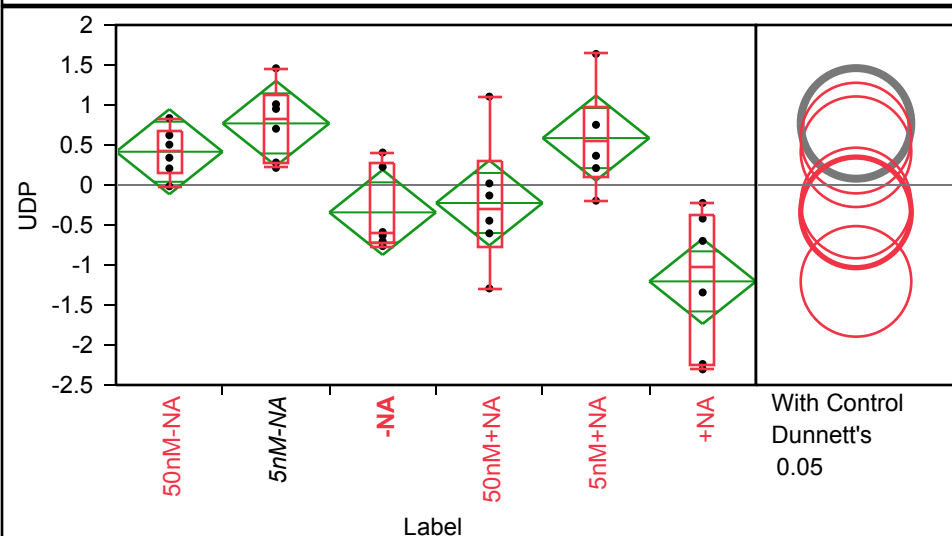

### Quantiles

| Level   | Minimum  | 10%      | 25%      | Median   | 75%      | 90%      | Maximum  |
|---------|----------|----------|----------|----------|----------|----------|----------|
| 50nM-NA | -0.0161  | -0.0161  | 0.151482 | 0.422856 | 0.675363 | 0.835872 | 0.835872 |
| 5nM-NA  | 0.214115 | 0.214115 | 0.264427 | 0.827264 | 1.122157 | 1.459107 | 1.459107 |
| -NA     | -0.76436 | -0.76436 | -0.71748 | -0.60938 | 0.270881 | 0.405568 | 0.405568 |
| 50nM+NA | -1.2928  | -1.2928  | -0.77622 | -0.28888 | 0.290903 | 1.104865 | 1.104865 |
| 5nM+NA  | -0.19603 | -0.19603 | 0.109647 | 0.556636 | 0.97375  | 1.638252 | 1.638252 |
| +NA     | -2.30479 | -2.30479 | -2.25476 | -1.02108 | -0.37084 | -0.22455 | -0.22455 |

### Oneway Anova

#### Summary of Fit

|                            |          |
|----------------------------|----------|
| Rsquare                    | 0.573537 |
| Adj Rsquare                | 0.50246  |
| Root Mean Square Error     | 0.637051 |
| Mean of Response           | -2.8e-10 |
| Observations (or Sum Wgts) | 36       |

#### Analysis of Variance

| Source   | DF | Sum of Squares | Mean Square | F Ratio | Prob > F |
|----------|----|----------------|-------------|---------|----------|
| Label    | 5  | 16.373801      | 3.27476     | 8.0692  | <.0001 * |
| Error    | 30 | 12.175012      | 0.40583     |         |          |
| C. Total | 35 | 28.548812      |             |         |          |

#### Means for Oneway Anova

| Level   | Number | Mean    | Std Error | Lower 95% | Upper 95% |
|---------|--------|---------|-----------|-----------|-----------|
| 50nM-NA | 6      | 0.4158  | 0.26007   | -0.115    | 0.947     |
| 5nM-NA  | 6      | 0.7698  | 0.26007   | 0.239     | 1.301     |
| -NA     | 6      | -0.3422 | 0.26007   | -0.873    | 0.189     |
| 50nM+NA | 6      | -0.2250 | 0.26007   | -0.756    | 0.306     |
| 5nM+NA  | 6      | 0.5865  | 0.26007   | 0.055     | 1.118     |
| +NA     | 6      | -1.2049 | 0.26007   | -1.736    | -0.674    |

Std Error uses a pooled estimate of error variance

### Means Comparisons

#### Comparisons with a control using Dunnett's Method

### Oneway Analysis of UDP-D-glucose By Label

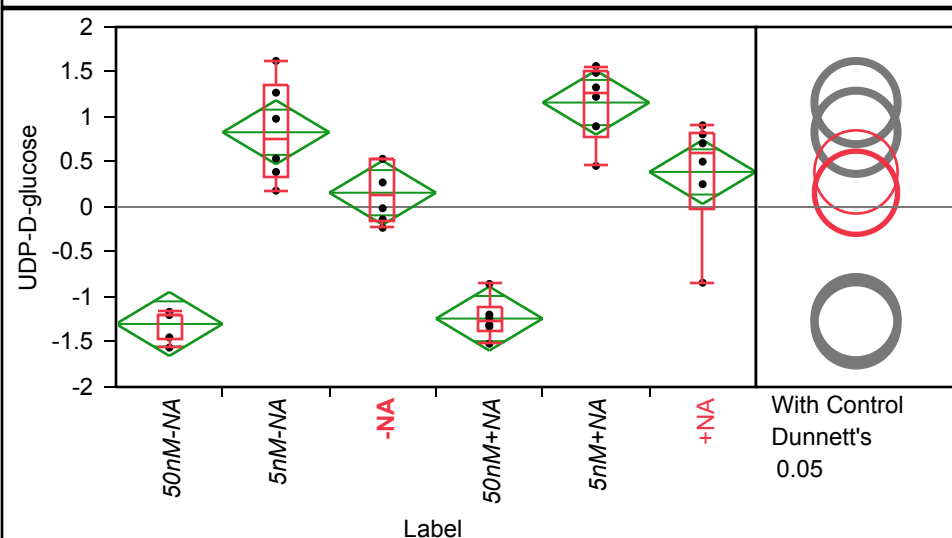

### Quantiles

| Level   | Minimum  | 10%      | 25%      | Median   | 75%      | 90%      | Maximum  |
|---------|----------|----------|----------|----------|----------|----------|----------|
| 50nM-NA | -1.56212 | -1.56212 | -1.47715 | -1.20989 | -1.19183 | -1.16498 | -1.16498 |
| 5nM-NA  | 0.181401 | 0.181401 | 0.337238 | 0.759169 | 1.358584 | 1.623432 | 1.623432 |
| -NA     | -0.23139 | -0.23139 | -0.1613  | 0.129291 | 0.5289   | 0.535191 | 0.535191 |
| 50nM+NA | -1.51876 | -1.51876 | -1.37636 | -1.27036 | -1.11035 | -0.85494 | -0.85494 |
| 5nM+NA  | 0.456443 | 0.456443 | 0.786601 | 1.276531 | 1.50979  | 1.566503 | 1.566503 |
| +NA     | -0.84139 | -0.84139 | -0.02034 | 0.605604 | 0.832226 | 0.907548 | 0.907548 |

### Oneway Anova

#### Summary of Fit

|                            |          |
|----------------------------|----------|
| Rsquare                    | 0.857026 |
| Adj Rsquare                | 0.833197 |
| Root Mean Square Error     | 0.426002 |
| Mean of Response           | -8.3e-10 |
| Observations (or Sum Wgts) | 36       |

#### Analysis of Variance

| Source   | DF | Sum of Squares | Mean Square | F Ratio | Prob > F |
|----------|----|----------------|-------------|---------|----------|
| Label    | 5  | 32.634849      | 6.52697     | 35.9657 | <.0001 * |
| Error    | 30 | 5.444331       | 0.18148     |         |          |
| C. Total | 35 | 38.079180      |             |         |          |

#### Means for Oneway Anova

| Level   | Number | Mean    | Std Error | Lower 95% | Upper 95% |
|---------|--------|---------|-----------|-----------|-----------|
| 50nM-NA | 6      | -1.2994 | 0.17391   | -1.655    | -0.944    |
| 5nM-NA  | 6      | 0.8304  | 0.17391   | 0.475     | 1.186     |
| -NA     | 6      | 0.1585  | 0.17391   | -0.197    | 0.514     |
| 50nM+NA | 6      | -1.2398 | 0.17391   | -1.595    | -0.885    |
| 5nM+NA  | 6      | 1.1606  | 0.17391   | 0.805     | 1.516     |
| +NA     | 6      | 0.3896  | 0.17391   | 0.034     | 0.745     |

Std Error uses a pooled estimate of error variance

### Means Comparisons

#### Comparisons with a control using Dunnett's Method

### Oneway Analysis of UDP-D-glucuronate By Label

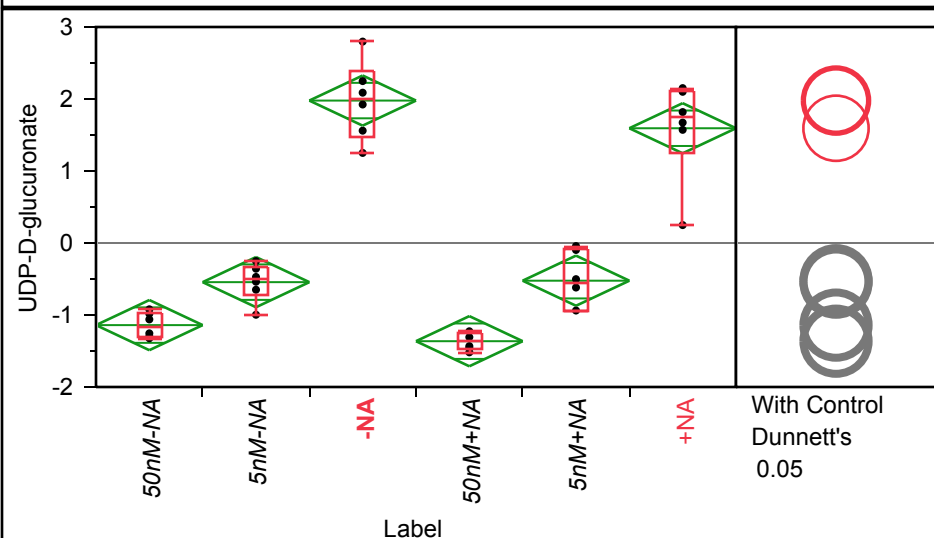

### Quantiles

| Level   | Minimum  | 10%      | 25%      | Median   | 75%      | 90%      | Maximum  |
|---------|----------|----------|----------|----------|----------|----------|----------|
| 50nM-NA | -1.32358 | -1.32358 | -1.30521 | -1.15812 | -0.9675  | -0.92102 | -0.92102 |
| 5nM-NA  | -0.99638 | -0.99638 | -0.73593 | -0.5045  | -0.33058 | -0.25154 | -0.25154 |
| -NA     | 1.251124 | 1.251124 | 1.482838 | 2.005629 | 2.385819 | 2.797112 | 2.797112 |
| 50nM+NA | -1.51863 | -1.51863 | -1.47364 | -1.36999 | -1.23611 | -1.22635 | -1.22635 |
| 5nM+NA  | -0.94342 | -0.94342 | -0.93928 | -0.56036 | -0.08319 | -0.04292 | -0.04292 |
| +NA     | 0.248746 | 0.248746 | 1.240968 | 1.745306 | 2.112761 | 2.151078 | 2.151078 |

### Oneway Anova

#### Summary of Fit

|                            |          |
|----------------------------|----------|
| Rsquare                    | 0.9211   |
| Adj Rsquare                | 0.907949 |
| Root Mean Square Error     | 0.417679 |
| Mean of Response           | 2.78e-10 |
| Observations (or Sum Wgts) | 36       |

#### Analysis of Variance

| Source   | DF | Sum of Squares | Mean Square | F Ratio | Prob > F |
|----------|----|----------------|-------------|---------|----------|
| Label    | 5  | 61.098926      | 12.2198     | 70.0452 | <.0001 * |
| Error    | 30 | 5.233674       | 0.1745      |         |          |
| C. Total | 35 | 66.332600      |             |         |          |

#### Means for Oneway Anova

| Level   | Number | Mean    | Std Error | Lower 95% | Upper 95% |
|---------|--------|---------|-----------|-----------|-----------|
| 50nM-NA | 6      | -1.1405 | 0.17052   | -1.489    | -0.792    |
| 5nM-NA  | 6      | -0.5438 | 0.17052   | -0.892    | -0.196    |
| -NA     | 6      | 1.9780  | 0.17052   | 1.630     | 2.326     |
| 50nM+NA | 6      | -1.3638 | 0.17052   | -1.712    | -1.016    |
| 5nM+NA  | 6      | -0.5236 | 0.17052   | -0.872    | -0.175    |
| +NA     | 6      | 1.5937  | 0.17052   | 1.245     | 1.942     |

Std Error uses a pooled estimate of error variance

### Means Comparisons

#### Comparisons with a control using Dunnett's Method

### Oneway Analysis of UDP-N-acetyl-glucosamine By Label

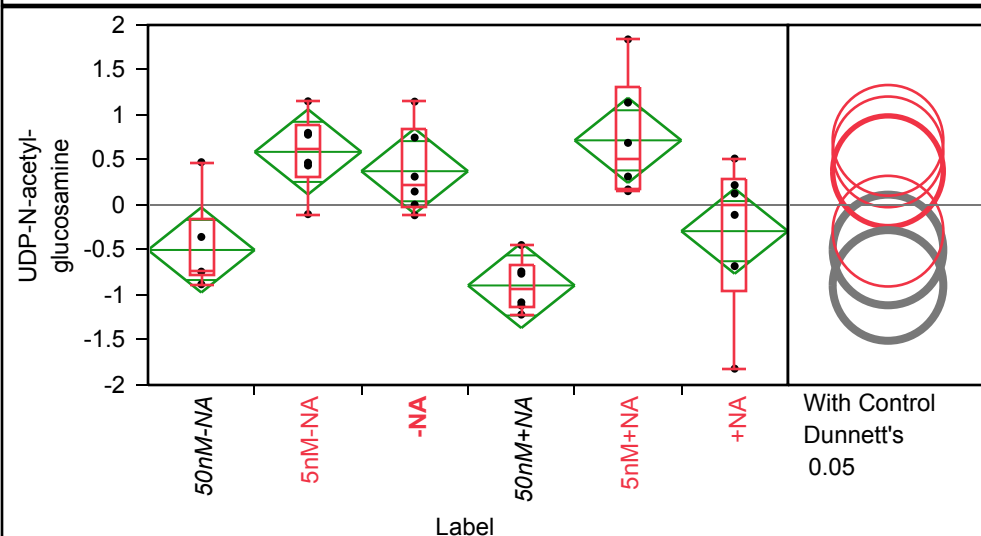

### Quantiles

| Level   | Minimum  | 10%      | 25%      | Median   | 75%      | 90%      | Maximum  |
|---------|----------|----------|----------|----------|----------|----------|----------|
| 50nM-NA | -0.88104 | -0.88104 | -0.78201 | -0.7444  | -0.1473  | 0.475667 | 0.475667 |
| 5nM-NA  | -0.10193 | -0.10193 | 0.303712 | 0.625371 | 0.889444 | 1.152203 | 1.152203 |
| -NA     | -0.11381 | -0.11381 | -0.0255  | 0.232764 | 0.849207 | 1.14853  | 1.14853  |
| 50nM+NA | -1.2178  | -1.2178  | -1.14222 | -0.92262 | -0.66542 | -0.44532 | -0.44532 |
| 5nM+NA  | 0.153824 | 0.153824 | 0.167633 | 0.503269 | 1.313515 | 1.839819 | 1.839819 |
| +NA     | -1.81865 | -1.81865 | -0.96404 | 0.008515 | 0.294754 | 0.516225 | 0.516225 |

### Oneway Anova

#### Summary of Fit

|                            |          |
|----------------------------|----------|
| Rsquare                    | 0.571237 |
| Adj Rsquare                | 0.499777 |
| Root Mean Square Error     | 0.566667 |
| Mean of Response           | 5.56e-11 |
| Observations (or Sum Wgts) | 36       |

#### Analysis of Variance

| Source   | DF | Sum of Squares | Mean Square | F Ratio | Prob > F |
|----------|----|----------------|-------------|---------|----------|
| Label    | 5  | 12.834462      | 2.56689     | 7.9938  | <.0001 * |
| Error    | 30 | 9.633361       | 0.32111     |         |          |
| C. Total | 35 | 22.467823      |             |         |          |

#### Means for Oneway Anova

| Level   | Number | Mean     | Std Error | Lower 95% | Upper 95% |
|---------|--------|----------|-----------|-----------|-----------|
| 50nM-NA | 6      | -0.49969 | 0.23134   | -0.972    | -0.027    |
| 5nM-NA  | 6      | 0.59030  | 0.23134   | 0.118     | 1.063     |
| -NA     | 6      | 0.37560  | 0.23134   | -0.097    | 0.848     |
| 50nM+NA | 6      | -0.89403 | 0.23134   | -1.366    | -0.422    |
| 5nM+NA  | 6      | 0.71842  | 0.23134   | 0.246     | 1.191     |
| +NA     | 6      | -0.29061 | 0.23134   | -0.763    | 0.182     |

Std Error uses a pooled estimate of error variance

### Means Comparisons

#### Comparisons with a control using Dunnett's Method

### Oneway Analysis of Urea By Label

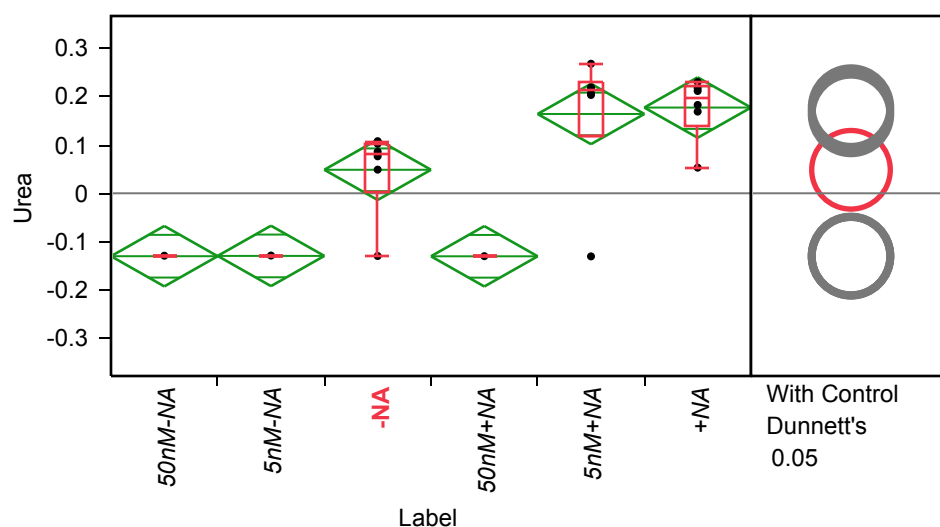

### Quantiles

| Level   | Minimum  | 10%      | 25%      | Median   | 75%      | 90%      | Maximum  |
|---------|----------|----------|----------|----------|----------|----------|----------|
| 50nM-NA | -0.13122 | -0.13122 | -0.13102 | -0.1308  | -0.13015 | -0.12957 | -0.12957 |
| 5nM-NA  | -0.13116 | -0.13116 | -0.13051 | -0.12995 | -0.12943 | -0.12926 | -0.12926 |
| -NA     | -0.13021 | -0.13021 | 0.004263 | 0.08154  | 0.104112 | 0.108186 | 0.108186 |
| 50nM+NA | -0.13116 | -0.13116 | -0.13098 | -0.13082 | -0.13053 | -0.13053 | -0.13053 |
| 5nM+NA  | -0.13099 | -0.13099 | 0.12029  | 0.212943 | 0.232185 | 0.268921 | 0.268921 |
| +NA     | 0.0532   | 0.0532   | 0.140466 | 0.197857 | 0.221574 | 0.230959 | 0.230959 |

### Oneway Anova

#### Summary of Fit

|                            |          |
|----------------------------|----------|
| Rsquare                    | 0.798846 |
| Adj Rsquare                | 0.76532  |
| Root Mean Square Error     | 0.075182 |
| Mean of Response           | -2.8e-10 |
| Observations (or Sum Wgts) | 36       |

#### Analysis of Variance

| Source   | DF | Sum of Squares | Mean Square | F Ratio | Prob > F |
|----------|----|----------------|-------------|---------|----------|
| Label    | 5  | 0.67341767     | 0.134684    | 23.8278 | <.0001 * |
| Error    | 30 | 0.16957077     | 0.005652    |         |          |
| C. Total | 35 | 0.84298844     |             |         |          |

#### Means for Oneway Anova

| Level   | Number | Mean     | Std Error | Lower 95% | Upper 95% |
|---------|--------|----------|-----------|-----------|-----------|
| 50nM-NA | 6      | -0.13061 | 0.03069   | -0.1933   | -0.0679   |
| 5nM-NA  | 6      | -0.13002 | 0.03069   | -0.1927   | -0.0673   |
| -NA     | 6      | 0.04882  | 0.03069   | -0.0139   | 0.1115    |
| 50nM+NA | 6      | -0.13080 | 0.03069   | -0.1935   | -0.0681   |
| 5nM+NA  | 6      | 0.16463  | 0.03069   | 0.1020    | 0.2273    |
| +NA     | 6      | 0.17798  | 0.03069   | 0.1153    | 0.2407    |

Std Error uses a pooled estimate of error variance

### Means Comparisons

#### Comparisons with a control using Dunnett's Method

### Oneway Analysis of Uric acid By Label

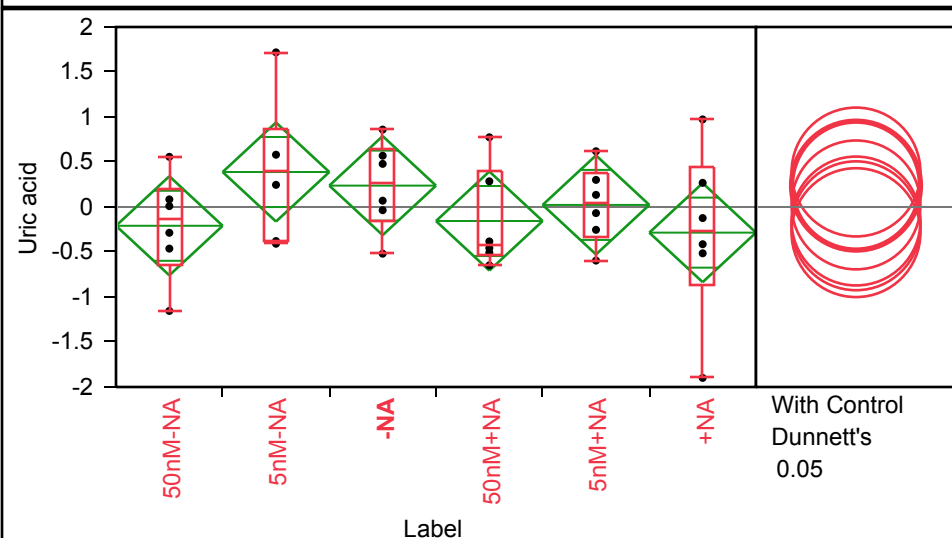

### Quantiles

| Level   | Minimum  | 10%      | 25%      | Median   | 75%      | 90%      | Maximum  |
|---------|----------|----------|----------|----------|----------|----------|----------|
| 50nM-NA | -1.15479 | -1.15479 | -0.63543 | -0.13831 | 0.202394 | 0.557297 | 0.557297 |
| 5nM-NA  | -0.40815 | -0.40815 | -0.38595 | 0.409919 | 0.865069 | 1.718225 | 1.718225 |
| -NA     | -0.5185  | -0.5185  | -0.15626 | 0.274785 | 0.642265 | 0.859976 | 0.859976 |
| 50nM+NA | -0.64842 | -0.64842 | -0.54222 | -0.41956 | 0.407642 | 0.774395 | 0.774395 |
| 5nM+NA  | -0.59533 | -0.59533 | -0.33897 | 0.033504 | 0.380777 | 0.6192   | 0.6192   |
| +NA     | -1.89911 | -1.89911 | -0.86072 | -0.26828 | 0.444443 | 0.972946 | 0.972946 |

### Oneway Anova

#### Summary of Fit

|                            |          |
|----------------------------|----------|
| Rsquare                    | 0.14082  |
| Adj Rsquare                | -0.00238 |
| Root Mean Square Error     | 0.660011 |
| Mean of Response           | -6.2e-18 |
| Observations (or Sum Wgts) | 36       |

#### Analysis of Variance

| Source   | DF | Sum of Squares | Mean Square | F Ratio | Prob > F |
|----------|----|----------------|-------------|---------|----------|
| Label    | 5  | 2.141917       | 0.428383    | 0.9834  | 0.4441   |
| Error    | 30 | 13.068433      | 0.435614    |         |          |
| C. Total | 35 | 15.210351      |             |         |          |

#### Means for Oneway Anova

| Level   | Number | Mean     | Std Error | Lower 95% | Upper 95% |
|---------|--------|----------|-----------|-----------|-----------|
| 50nM-NA | 6      | -0.20872 | 0.26945   | -0.7590   | 0.34156   |
| 5nM-NA  | 6      | 0.38868  | 0.26945   | -0.1616   | 0.93896   |
| -NA     | 6      | 0.23754  | 0.26945   | -0.3127   | 0.78782   |
| 50nM+NA | 6      | -0.15576 | 0.26945   | -0.7060   | 0.39453   |
| 5nM+NA  | 6      | 0.02311  | 0.26945   | -0.5272   | 0.57340   |
| +NA     | 6      | -0.28484 | 0.26945   | -0.8351   | 0.26545   |

Std Error uses a pooled estimate of error variance

### Means Comparisons

#### Comparisons with a control using Dunnett's Method

### Oneway Analysis of uridine By Label

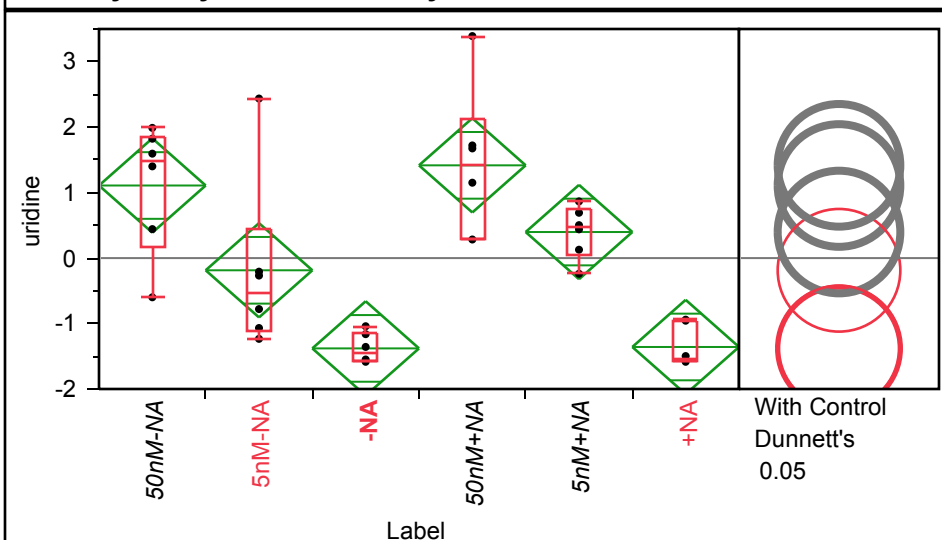

### Quantiles

| Level   | Minimum  | 10%      | 25%      | Median   | 75%      | 90%      | Maximum  |
|---------|----------|----------|----------|----------|----------|----------|----------|
| 50nM-NA | -0.59891 | -0.59891 | 0.182365 | 1.498594 | 1.865107 | 1.989222 | 1.989222 |
| 5nM-NA  | -1.2338  | -1.2338  | -1.10972 | -0.52309 | 0.45375  | 2.437687 | 2.437687 |
| -NA     | -1.58434 | -1.58434 | -1.58432 | -1.45331 | -1.13189 | -1.04112 | -1.04112 |
| 50nM+NA | 0.278015 | 0.278015 | 0.282486 | 1.413621 | 2.138696 | 3.391651 | 3.391651 |
| 5nM+NA  | -0.23949 | -0.23949 | 0.035949 | 0.471266 | 0.735778 | 0.865941 | 0.865941 |
| +NA     | -1.58489 | -1.58489 | -1.5846  | -1.5407  | -0.95263 | -0.94104 | -0.94104 |

### Oneway Anova

#### Summary of Fit

|                            |          |
|----------------------------|----------|
| Rsquare                    | 0.658092 |
| Adj Rsquare                | 0.601107 |
| Root Mean Square Error     | 0.863695 |
| Mean of Response           | 2.778e-9 |
| Observations (or Sum Wgts) | 36       |

#### Analysis of Variance

| Source   | DF | Sum of Squares | Mean Square | F Ratio | Prob > F |
|----------|----|----------------|-------------|---------|----------|
| Label    | 5  | 43.074416      | 8.61488     | 11.5486 | <.0001 * |
| Error    | 30 | 22.379097      | 0.74597     |         |          |
| C. Total | 35 | 65.453513      |             |         |          |

#### Means for Oneway Anova

| Level   | Number | Mean    | Std Error | Lower 95% | Upper 95% |
|---------|--------|---------|-----------|-----------|-----------|
| 50nM-NA | 6      | 1.1090  | 0.35260   | 0.389     | 1.829     |
| 5nM-NA  | 6      | -0.1864 | 0.35260   | -0.906    | 0.534     |
| -NA     | 6      | -1.3798 | 0.35260   | -2.100    | -0.660    |
| 50nM+NA | 6      | 1.4170  | 0.35260   | 0.697     | 2.137     |
| 5nM+NA  | 6      | 0.3982  | 0.35260   | -0.322    | 1.118     |
| +NA     | 6      | -1.3581 | 0.35260   | -2.078    | -0.638    |

Std Error uses a pooled estimate of error variance

### Means Comparisons

#### Comparisons with a control using Dunnett's Method

### Oneway Analysis of UTP By Label

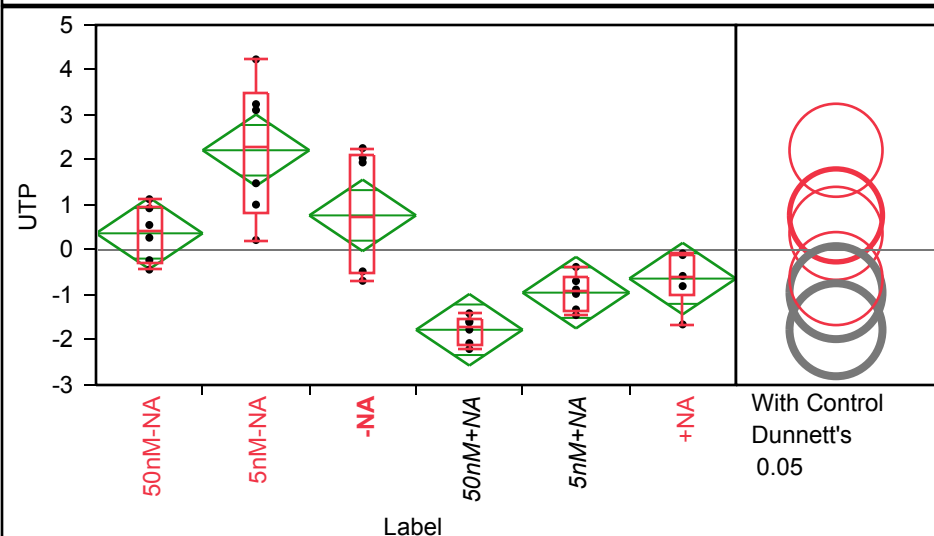

### Quantiles

| Level   | Minimum  | 10%      | 25%      | Median   | 75%      | 90%      | Maximum  |
|---------|----------|----------|----------|----------|----------|----------|----------|
| 50nM-NA | -0.43618 | -0.43618 | -0.27869 | 0.414739 | 0.977601 | 1.128711 | 1.128711 |
| 5nM-NA  | 0.220942 | 0.220942 | 0.811522 | 2.296008 | 3.490053 | 4.235981 | 4.235981 |
| -NA     | -0.68484 | -0.68484 | -0.53144 | 0.73489  | 2.099119 | 2.264122 | 2.264122 |
| 50nM+NA | -2.20113 | -2.20113 | -2.10255 | -1.68904 | -1.53685 | -1.40702 | -1.40702 |
| 5nM+NA  | -1.44707 | -1.44707 | -1.35235 | -0.92587 | -0.61198 | -0.37579 | -0.37579 |
| +NA     | -1.65396 | -1.65396 | -1.01567 | -0.58419 | -0.10322 | -0.07444 | -0.07444 |

### Oneway Anova

#### Summary of Fit

|                            |          |
|----------------------------|----------|
| Rsquare                    | 0.689721 |
| Adj Rsquare                | 0.638007 |
| Root Mean Square Error     | 0.952573 |
| Mean of Response           | 2.78e-10 |
| Observations (or Sum Wgts) | 36       |

#### Analysis of Variance

| Source   | DF | Sum of Squares | Mean Square | F Ratio | Prob > F |
|----------|----|----------------|-------------|---------|----------|
| Label    | 5  | 60.511535      | 12.1023     | 13.3374 | <.0001 * |
| Error    | 30 | 27.221865      | 0.9074      |         |          |
| C. Total | 35 | 87.733400      |             |         |          |

#### Means for Oneway Anova

| Level   | Number | Mean    | Std Error | Lower 95% | Upper 95% |
|---------|--------|---------|-----------|-----------|-----------|
| 50nM-NA | 6      | 0.3705  | 0.38889   | -0.424    | 1.165     |
| 5nM-NA  | 6      | 2.2165  | 0.38889   | 1.422     | 3.011     |
| -NA     | 6      | 0.7688  | 0.38889   | -0.025    | 1.563     |
| 50nM+NA | 6      | -1.7727 | 0.38889   | -2.567    | -0.978    |
| 5nM+NA  | 6      | -0.9477 | 0.38889   | -1.742    | -0.153    |
| +NA     | 6      | -0.6354 | 0.38889   | -1.430    | 0.159     |

Std Error uses a pooled estimate of error variance

### Means Comparisons

#### Comparisons with a control using Dunnett's Method

### Oneway Analysis of Valine By Label

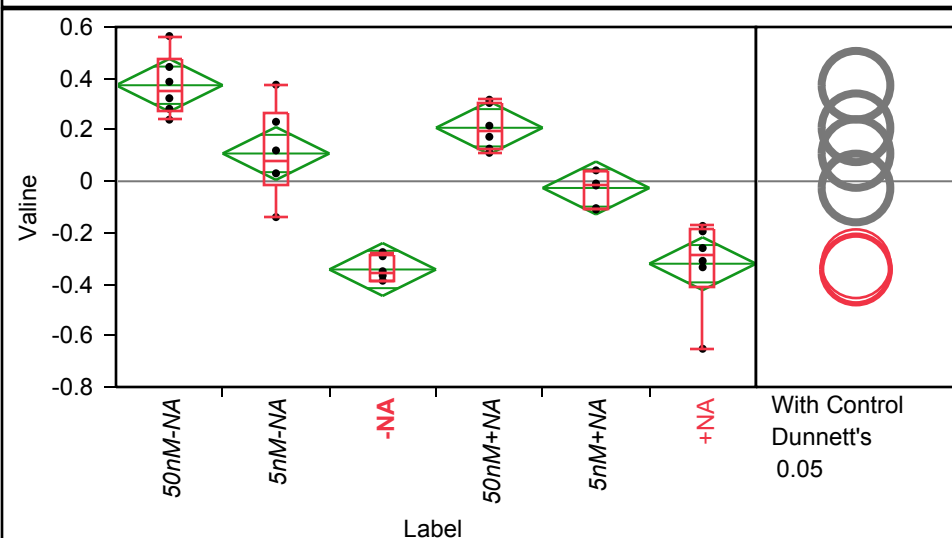

### Quantiles

| Level   | Minimum  | 10%      | 25%      | Median   | 75%      | 90%      | Maximum  |
|---------|----------|----------|----------|----------|----------|----------|----------|
| 50nM-NA | 0.239597 | 0.239597 | 0.271379 | 0.355    | 0.474639 | 0.564752 | 0.564752 |
| 5nM-NA  | -0.13938 | -0.13938 | -0.01237 | 0.075466 | 0.267317 | 0.375406 | 0.375406 |
| -NA     | -0.38787 | -0.38787 | -0.38695 | -0.35819 | -0.28748 | -0.27552 | -0.27552 |
| 50nM+NA | 0.110683 | 0.110683 | 0.122838 | 0.194546 | 0.307701 | 0.317169 | 0.317169 |
| 5nM+NA  | -0.10971 | -0.10971 | -0.10587 | -0.01255 | 0.041242 | 0.042477 | 0.042477 |
| +NA     | -0.65135 | -0.65135 | -0.41364 | -0.28472 | -0.18941 | -0.17367 | -0.17367 |

### Oneway Anova

#### Summary of Fit

|                            |          |
|----------------------------|----------|
| Rsquare                    | 0.845779 |
| Adj Rsquare                | 0.820076 |
| Root Mean Square Error     | 0.123102 |
| Mean of Response           | -8.3e-11 |
| Observations (or Sum Wgts) | 36       |

#### Analysis of Variance

| Source   | DF | Sum of Squares | Mean Square | F Ratio | Prob > F |
|----------|----|----------------|-------------|---------|----------|
| Label    | 5  | 2.4932621      | 0.498652    | 32.9052 | <.0001 * |
| Error    | 30 | 0.4546257      | 0.015154    |         |          |
| C. Total | 35 | 2.9478879      |             |         |          |

#### Means for Oneway Anova

| Level   | Number | Mean     | Std Error | Lower 95% | Upper 95% |
|---------|--------|----------|-----------|-----------|-----------|
| 50nM-NA | 6      | 0.37349  | 0.05026   | 0.2709    | 0.4761    |
| 5nM-NA  | 6      | 0.10803  | 0.05026   | 0.0054    | 0.2107    |
| -NA     | 6      | -0.34298 | 0.05026   | -0.4456   | -0.2403   |
| 50nM+NA | 6      | 0.20806  | 0.05026   | 0.1054    | 0.3107    |
| 5nM+NA  | 6      | -0.02602 | 0.05026   | -0.1287   | 0.0766    |
| +NA     | 6      | -0.32059 | 0.05026   | -0.4232   | -0.2179   |

Std Error uses a pooled estimate of error variance

### Means Comparisons

#### Comparisons with a control using Dunnett's Method

### Oneway Analysis of xanthine By Label

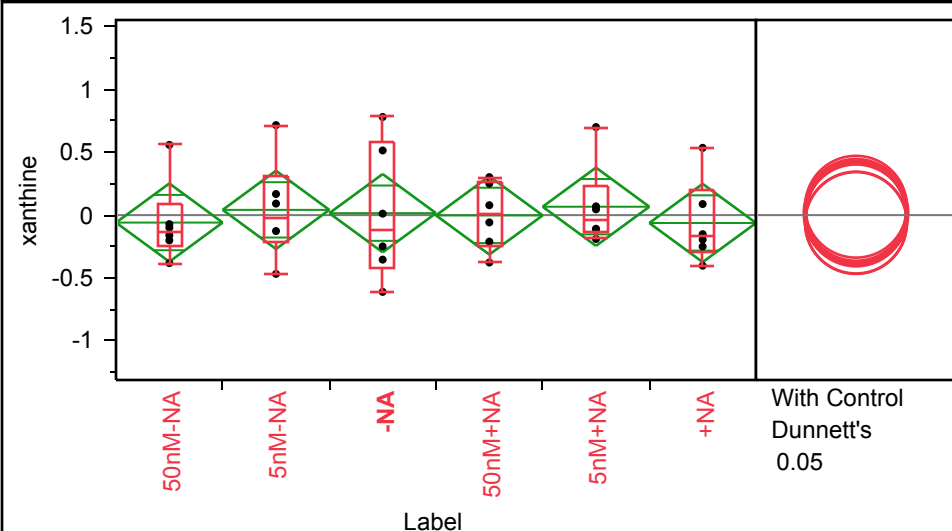

### Quantiles

| Level   | Minimum  | 10%      | 25%      | Median   | 75%      | 90%      | Maximum  |
|---------|----------|----------|----------|----------|----------|----------|----------|
| 50nM-NA | -0.3822  | -0.3822  | -0.24636 | -0.13037 | 0.086029 | 0.55936  | 0.55936  |
| 5nM-NA  | -0.46799 | -0.46799 | -0.21514 | -0.01752 | 0.305169 | 0.716815 | 0.716815 |
| -NA     | -0.61134 | -0.61134 | -0.41868 | -0.11879 | 0.581641 | 0.781686 | 0.781686 |
| 50nM+NA | -0.37757 | -0.37757 | -0.25267 | 0.010427 | 0.264693 | 0.302625 | 0.302625 |
| 5nM+NA  | -0.19002 | -0.19002 | -0.13554 | -0.03129 | 0.227627 | 0.701405 | 0.701405 |
| +NA     | -0.40256 | -0.40256 | -0.28864 | -0.17331 | 0.200069 | 0.535944 | 0.535944 |

### Oneway Anova

#### Summary of Fit

|                            |          |
|----------------------------|----------|
| Rsquare                    | 0.019535 |
| Adj Rsquare                | -0.14388 |
| Root Mean Square Error     | 0.373754 |
| Mean of Response           | -5.6e-10 |
| Observations (or Sum Wgts) | 36       |

#### Analysis of Variance

| Source   | DF | Sum of Squares | Mean Square | F Ratio | Prob > F |
|----------|----|----------------|-------------|---------|----------|
| Label    | 5  | 0.0834977      | 0.016700    | 0.1195  | 0.9870   |
| Error    | 30 | 4.1907651      | 0.139692    |         |          |
| C. Total | 35 | 4.2742627      |             |         |          |

#### Means for Oneway Anova

| Level   | Number | Mean     | Std Error | Lower 95% | Upper 95% |
|---------|--------|----------|-----------|-----------|-----------|
| 50nM-NA | 6      | -0.05940 | 0.15258   | -0.3710   | 0.25222   |
| 5nM-NA  | 6      | 0.04182  | 0.15258   | -0.2698   | 0.35343   |
| -NA     | 6      | 0.01555  | 0.15258   | -0.2961   | 0.32716   |
| 50nM+NA | 6      | -0.00218 | 0.15258   | -0.3138   | 0.30944   |
| 5nM+NA  | 6      | 0.06685  | 0.15258   | -0.2448   | 0.37847   |
| +NA     | 6      | -0.06263 | 0.15258   | -0.3743   | 0.24898   |

Std Error uses a pooled estimate of error variance

### Means Comparisons

#### Comparisons with a control using Dunnett's Method

### Oneway Analysis of Xanthurenic acid By Label

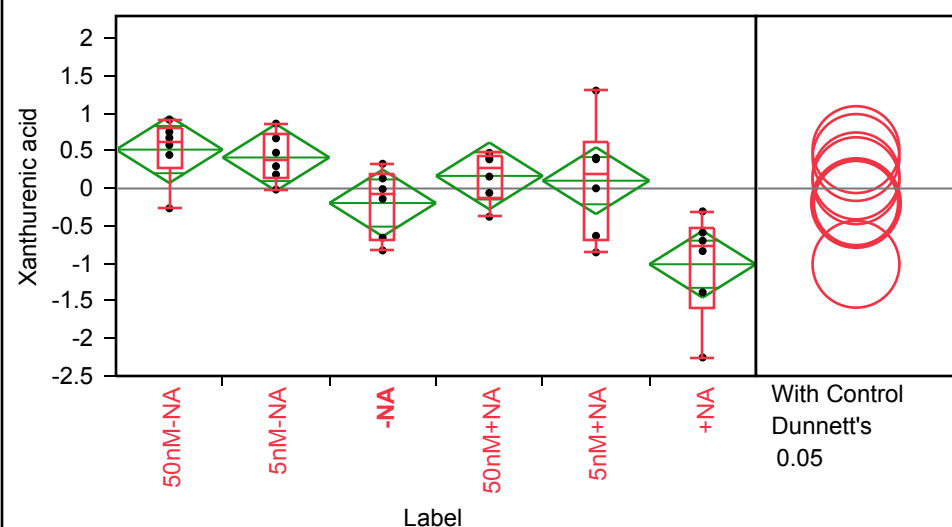

### Quantiles

| Level   | Minimum  | 10%      | 25%      | Median   | 75%      | 90%      | Maximum  |
|---------|----------|----------|----------|----------|----------|----------|----------|
| 50nM-NA | -0.26439 | -0.26439 | 0.269869 | 0.627561 | 0.795472 | 0.917001 | 0.917001 |
| 5nM-NA  | -0.01473 | -0.01473 | 0.135834 | 0.387631 | 0.71772  | 0.865069 | 0.865069 |
| -NA     | -0.82577 | -0.82577 | -0.69847 | -0.07252 | 0.182874 | 0.329697 | 0.329697 |
| 50nM+NA | -0.3769  | -0.3769  | -0.13896 | 0.273867 | 0.434442 | 0.475813 | 0.475813 |
| 5nM+NA  | -0.8518  | -0.8518  | -0.68609 | 0.196553 | 0.63289  | 1.304845 | 1.304845 |
| +NA     | -2.25296 | -2.25296 | -1.60144 | -0.76496 | -0.51686 | -0.30481 | -0.30481 |

### Oneway Anova

#### Summary of Fit

|                            |          |
|----------------------------|----------|
| Rsquare                    | 0.518999 |
| Adj Rsquare                | 0.438832 |
| Root Mean Square Error     | 0.533617 |
| Mean of Response           | -1.1e-10 |
| Observations (or Sum Wgts) | 36       |

#### Analysis of Variance

| Source   | DF | Sum of Squares | Mean Square | F Ratio | Prob > F |
|----------|----|----------------|-------------|---------|----------|
| Label    | 5  | 9.217244       | 1.84345     | 6.4740  | 0.0003 * |
| Error    | 30 | 8.542415       | 0.28475     |         |          |
| C. Total | 35 | 17.759659      |             |         |          |

#### Means for Oneway Anova

| Level   | Number | Mean    | Std Error | Lower 95% | Upper 95% |
|---------|--------|---------|-----------|-----------|-----------|
| 50nM-NA | 6      | 0.5184  | 0.21785   | 0.074     | 0.9633    |
| 5nM-NA  | 6      | 0.4134  | 0.21785   | -0.032    | 0.8583    |
| -NA     | 6      | -0.1939 | 0.21785   | -0.639    | 0.2510    |
| 50nM+NA | 6      | 0.1679  | 0.21785   | -0.277    | 0.6128    |
| 5nM+NA  | 6      | 0.1040  | 0.21785   | -0.341    | 0.5489    |
| +NA     | 6      | -1.0099 | 0.21785   | -1.455    | -0.5650   |

Std Error uses a pooled estimate of error variance

### Means Comparisons

#### Comparisons with a control using Dunnett's Method

# Oneway Analysis of 1-(5Z,8Z,11Z,14Z-eicosatetraenoyl)-sn-glycero-3-phosphocholine By Labe

## Means Comparisons

### Comparisons with a control using Dunnett's Method

Control Group = -NA

|         |       |
|---------|-------|
| d       | Alpha |
| 2.65691 | 0.05  |

| Level   | Abs(Dif)-<br>LSD | p-Value  |
|---------|------------------|----------|
| 50nM+NA | -0.01            | 0.0570   |
| -NA     | -0.42            | 1.0000   |
| 5nM-NA  | 0.265            | 0.0007 * |
| 50nM-NA | 0.363            | 0.0001 * |
| 5nM+NA  | 0.595            | <.0001 * |
| +NA     | 0.803            | <.0001 * |

Positive values show pairs of means that are significantly different.

|   |                                                    |
|---|----------------------------------------------------|
| I | Oneway Analysis of 1,3-diphosphoglycerate By Label |
|---|----------------------------------------------------|

|                   |
|-------------------|
| Means Comparisons |
|-------------------|

|                                                   |
|---------------------------------------------------|
| Comparisons with a control using Dunnett's Method |
|---------------------------------------------------|

Control Group = -NA

|         |       |
|---------|-------|
| d       | Alpha |
| 2.65691 | 0.05  |

| Level   | Abs(Dif)-LSD | p-Value  |
|---------|--------------|----------|
| -NA     | -1.04        | 1.0000   |
| 5nM-NA  | -0.92        | 0.9984   |
| 5nM+NA  | -0.3         | 0.2384   |
| +NA     | -0.23        | 0.1683   |
| 50nM-NA | -0.09        | 0.0841   |
| 50nM+NA | 0.868        | 0.0002 * |

Positive values show pairs of means that are significantly different.

# Oneway Analysis of 1-Aminocyclopropanecarboxylic acid By Label

## Means Comparisons

### Comparisons with a control using Dunnett's Method

Control Group = -NA

|           | d       | Alpha    |
|-----------|---------|----------|
|           | 2.65691 | 0.05     |
| Abs(Dif)- |         |          |
| Level     | LSD     | p-Value  |
| 5nM-NA    | 0.037   | 0.0036 * |
| 50nM+NA   | 0.013   | 0.0206 * |
| 5nM+NA    | -0.02   | 0.1980   |
| +NA       | -0.05   | 0.5714   |
| -NA       | -0.09   | 1.0000   |
| 50nM-NA   | -0.07   | 0.9645   |

Positive values show pairs of means that are significantly different.

# Oneway Analysis of 1-Hexadecyl-2-arachidonoyl-glycerol By Label

## Means Comparisons

### Comparisons with a control using Dunnett's Method

Control Group = -NA

|           | d       | Alpha    |
|-----------|---------|----------|
|           | 2.65691 | 0.05     |
| Abs(Dif)- |         |          |
| Level     | LSD     | p-Value  |
| 50nM+NA   | 1.038   | 0.0006 * |
| 50nM-NA   | -0.07   | 0.0644   |
| 5nM+NA    | -1.4    | 0.9984   |
| 5nM-NA    | -1.56   | 1.0000   |
| -NA       | -1.57   | 1.0000   |
| +NA       | -1.02   | 0.8170   |

Positive values show pairs of means that are significantly different.

# Oneway Analysis of 1-Methyladenosine By Label

## Means Comparisons

### Comparisons with a control using Dunnett's Method

Control Group = -NA

|         |       |
|---------|-------|
| d       | Alpha |
| 2.65691 | 0.05  |

| Level   | Abs(Dif)-LSD | p-Value |
|---------|--------------|---------|
| 5nM-NA  | -0.56        | 0.6550  |
| 5nM+NA  | -0.62        | 0.7678  |
| 50nM+NA | -0.85        | 0.9947  |
| -NA     | -1           | 1.0000  |
| 50nM-NA | -0.93        | 0.9999  |
| +NA     | -0.41        | 0.3959  |

Positive values show pairs of means that are significantly different.

**Oneway Analysis of 1-Methyl-Histidine By Label****Means Comparisons****Comparisons with a control using Dunnett's Method**

Control Group = -NA

|         |       |
|---------|-------|
| d       | Alpha |
| 2.65691 | 0.05  |

| Level   | Abs(Dif)-LSD | p-Value  |
|---------|--------------|----------|
| 5nM-NA  | -0.9         | 1.0000   |
| -NA     | -0.92        | 1.0000   |
| 5nM+NA  | -0.58        | 0.7825   |
| +NA     | -0.17        | 0.1374   |
| 50nM-NA | -0.13        | 0.1081   |
| 50nM+NA | 0.016        | 0.0451 * |

Positive values show pairs of means that are significantly different.

# Oneway Analysis of 1-Octadecanoyl-sn-glycero-3-phosphocholine By Label

## Means Comparisons

### Comparisons with a control using Dunnett's Method

Control Group = -NA

|           | d       | Alpha    |
|-----------|---------|----------|
|           | 2.65691 | 0.05     |
| Abs(Dif)- |         |          |
| Level     | LSD     | p-Value  |
| 50nM+NA   | -1.14   | 0.9996   |
| -NA       | -1.24   | 1.0000   |
| 5nM-NA    | 0.41    | 0.0059 * |
| 5nM+NA    | 0.926   | 0.0003 * |
| 50nM-NA   | 1.143   | <.0001 * |
| +NA       | 2.964   | <.0001 * |

Positive values show pairs of means that are significantly different.

# Oneway Analysis of 1-oleoyl-2-hydroxy-sn-glycero-3-phosphocholine By Label

## Means Comparisons

### Comparisons with a control using Dunnett's Method

Control Group = -NA

|           | d       | Alpha    |
|-----------|---------|----------|
|           | 2.65691 | 0.05     |
| Abs(Dif)- |         |          |
| Level     | LSD     | p-Value  |
| 50nM+NA   | 1.335   | 0.0006 * |
| -NA       | -2.05   | 1.0000   |
| 5nM-NA    | 1.476   | 0.0004 * |
| 5nM+NA    | 1.502   | 0.0003 * |
| 50nM-NA   | 2.247   | <.0001 * |
| +NA       | 3.043   | <.0001 * |

Positive values show pairs of means that are significantly different.

**Oneway Analysis of 2-Aminooctanoic acid By Label****Means Comparisons****Comparisons with a control using Dunnett's Method**

Control Group = -NA

|         |       |
|---------|-------|
| d       | Alpha |
| 2.65691 | 0.05  |

| Level   | Abs(Dif)-<br>LSD | p-Value |
|---------|------------------|---------|
| 5nM-NA  | -0.58            | 0.8111  |
| -NA     | -0.89            | 1.0000  |
| 50nM-NA | -0.86            | 1.0000  |
| 5nM+NA  | -0.79            | 0.9984  |
| +NA     | -0.63            | 0.8944  |
| 50nM+NA | -0.54            | 0.7399  |

Positive values show pairs of means that are significantly different.

**Oneway Analysis of 2-dehydro-D-gluconate By Label****Means Comparisons****Comparisons with a control using Dunnett's Method**

Control Group = -NA

|         |       |
|---------|-------|
| d       | Alpha |
| 2.65691 | 0.05  |

| Level   | Abs(Dif)-<br>LSD | p-Value |
|---------|------------------|---------|
| -NA     | -1.31            | 1.0000  |
| 5nM+NA  | -0.77            | 0.7158  |
| 50nM-NA | -0.66            | 0.5516  |
| +NA     | -0.41            | 0.2627  |
| 5nM-NA  | -0.25            | 0.1469  |
| 50nM+NA | -0.11            | 0.0817  |

Positive values show pairs of means that are significantly different.

|                                                               |
|---------------------------------------------------------------|
| <b>Oneway Analysis of 2-deoxyglucose-6-phosphate By Label</b> |
|---------------------------------------------------------------|

|                          |
|--------------------------|
| <b>Means Comparisons</b> |
|--------------------------|

|                                                          |
|----------------------------------------------------------|
| <b>Comparisons with a control using Dunnett's Method</b> |
|----------------------------------------------------------|

Control Group = -NA

|           | d       | Alpha    |
|-----------|---------|----------|
|           | 2.65691 | 0.05     |
| Abs(Dif)- |         |          |
| Level     | LSD     | p-Value  |
| 5nM+NA    | -0.33   | 0.2926   |
| +NA       | -0.92   | 0.9999   |
| -NA       | -0.99   | 1.0000   |
| 5nM-NA    | -0.96   | 1.0000   |
| 50nM+NA   | -0.39   | 0.3708   |
| 50nM-NA   | 0.002   | 0.0493 * |

Positive values show pairs of means that are significantly different.

**Oneway Analysis of 2-Hydroxy-2-methylbutanedioic acid By Label****Means Comparisons****Comparisons with a control using Dunnett's Method**

Control Group = -NA

|           | d       | Alpha    |
|-----------|---------|----------|
|           | 2.65691 | 0.05     |
| Abs(Dif)- |         |          |
| Level     | LSD     | p-Value  |
| +NA       | -1.03   | 1.0000   |
| -NA       | -1.04   | 1.0000   |
| 5nM-NA    | 0.027   | 0.0428 * |
| 50nM+NA   | 0.3     | 0.0078 * |
| 5nM+NA    | 0.327   | 0.0065 * |
| 50nM-NA   | 0.481   | 0.0023 * |

Positive values show pairs of means that are significantly different.

# Oneway Analysis of 2-hydroxyglutarate By Label

## Means Comparisons

### Comparisons with a control using Dunnett's Method

Control Group = -NA

|           | d       | Alpha    |
|-----------|---------|----------|
|           | 2.65691 | 0.05     |
| Abs(Dif)- |         |          |
| Level     | LSD     | p-Value  |
| 50nM-NA   | 0.157   | 0.0170 * |
| 5nM-NA    | 0.029   | 0.0412 * |
| 5nM+NA    | -0.07   | 0.0760   |
| 50nM+NA   | -0.37   | 0.3915   |
| +NA       | -0.68   | 0.9467   |
| -NA       | -0.9    | 1.0000   |

Positive values show pairs of means that are significantly different.

**Oneway Analysis of 2-Isopropylmalic acid By Label****Means Comparisons****Comparisons with a control using Dunnett's Method**

Control Group = -NA

|           | d       | Alpha   |
|-----------|---------|---------|
|           | 2.65691 | 0.05    |
| Abs(Dif)- |         |         |
| Level     | LSD     | p-Value |
| 5nM-NA    | -0.67   | 0.7332  |
| 50nM-NA   | -0.7    | 0.7855  |
| -NA       | -1.11   | 1.0000  |
| 5nM+NA    | -0.87   | 0.9678  |
| 50nM+NA   | -0.77   | 0.8743  |
| +NA       | -0.69   | 0.7716  |

Positive values show pairs of means that are significantly different.

# Oneway Analysis of 2-ketoglutarate By Label

## Means Comparisons

### Comparisons with a control using Dunnett's Method

Control Group = -NA

|           | d       | Alpha    |
|-----------|---------|----------|
|           | 2.65691 | 0.05     |
| Abs(Dif)- |         |          |
| Level     | LSD     | p-Value  |
| -NA       | -0.67   | 1.0000   |
| 5nM-NA    | -0.6    | 0.9988   |
| 50nM-NA   | -0.54   | 0.9798   |
| 50nM+NA   | 0.187   | 0.0084 * |
| 5nM+NA    | 0.49    | 0.0003 * |
| +NA       | 1.045   | <.0001 * |

Positive values show pairs of means that are significantly different.

# Oneway Analysis of 2-Oxo-4-hydroxy-5-aminovalerate By Label

## Means Comparisons

### Comparisons with a control using Dunnett's Method

Control Group = -NA

|           | d       | Alpha    |
|-----------|---------|----------|
|           | 2.65691 | 0.05     |
| Abs(Dif)- |         |          |
| Level     | LSD     | p-Value  |
| -NA       | -0.12   | 1.0000   |
| 5nM+NA    | -0.1    | 0.9934   |
| 50nM+NA   | -0.09   | 0.9588   |
| 5nM-NA    | 0.014   | 0.0247 * |
| 50nM-NA   | 0.109   | 0.0001 * |
| +NA       | 0.11    | <.0001 * |

Positive values show pairs of means that are significantly different.

# Oneway Analysis of 2-oxobutanoate By Label

## Means Comparisons

### Comparisons with a control using Dunnett's Method

Control Group = -NA

|         |       |
|---------|-------|
| d       | Alpha |
| 2.65691 | 0.05  |

| Level   | Abs(Dif)-<br>LSD | p-Value  |
|---------|------------------|----------|
| 50nM-NA | -0.33            | 0.4062   |
| 5nM-NA  | -0.49            | 0.7506   |
| -NA     | -0.8             | 1.0000   |
| 50nM+NA | -0.43            | 0.6113   |
| 5nM+NA  | -0.08            | 0.0887   |
| +NA     | 0.034            | 0.0387 * |

Positive values show pairs of means that are significantly different.

**Oneway Analysis of 3-phosphoglycerate By Label****Means Comparisons****Comparisons with a control using Dunnett's Method**

Control Group = -NA

|           | d       | Alpha   |
|-----------|---------|---------|
|           | 2.65691 | 0.05    |
| Abs(Dif)- |         |         |
| Level     | LSD     | p-Value |
| 5nM-NA    | -0.38   | 0.3658  |
| -NA       | -0.97   | 1.0000  |
| 50nM-NA   | -0.84   | 0.9964  |
| 5nM+NA    | -0.71   | 0.9211  |
| +NA       | -0.13   | 0.1083  |
| 50nM+NA   | -0.06   | 0.0708  |

Positive values show pairs of means that are significantly different.

# Oneway Analysis of 3-phospho-serine By Label

## Means Comparisons

### Comparisons with a control using Dunnett's Method

Control Group = -NA

|           | d       | Alpha    |
|-----------|---------|----------|
|           | 2.65691 | 0.05     |
| Abs(Dif)- |         |          |
| Level     | LSD     | p-Value  |
| -NA       | -0.91   | 1.0000   |
| 5nM-NA    | -0.52   | 0.6760   |
| 50nM-NA   | -0.28   | 0.2602   |
| 5nM+NA    | -0.09   | 0.0879   |
| 50nM+NA   | 0.051   | 0.0356 * |
| +NA       | 0.612   | 0.0005 * |

Positive values show pairs of means that are significantly different.

**Oneway Analysis of 4-aminobutyrate By Label****Means Comparisons****Comparisons with a control using Dunnett's Method**

Control Group = -NA

|         |       |
|---------|-------|
| d       | Alpha |
| 2.65691 | 0.05  |

| Level   | Abs(Dif)-<br>LSD | p-Value |
|---------|------------------|---------|
| 5nM-NA  | -0.45            | 0.9997  |
| -NA     | -0.49            | 1.0000  |
| 50nM+NA | -0.3             | 0.7730  |
| +NA     | -0.24            | 0.5320  |
| 50nM-NA | -0.18            | 0.3308  |
| 5nM+NA  | -0.12            | 0.1920  |

Positive values show pairs of means that are significantly different.

**Oneway Analysis of 4-Pyridoxic acid By Label****Means Comparisons****Comparisons with a control using Dunnett's Method**

Control Group = -NA

|           | d       | Alpha   |
|-----------|---------|---------|
|           | 2.65691 | 0.05    |
| Abs(Dif)- |         |         |
| Level     | LSD     | p-Value |
| 5nM-NA    | -1.12   | 0.9429  |
| -NA       | -1.49   | 1.0000  |
| +NA       | -1.1    | 0.9291  |
| 5nM+NA    | -0.92   | 0.7634  |
| 50nM-NA   | -0.85   | 0.6775  |
| 50nM+NA   | -0.49   | 0.2808  |

Positive values show pairs of means that are significantly different.

**Oneway Analysis of 6-phospho-D-gluconate By Label****Means Comparisons****Comparisons with a control using Dunnett's Method**

Control Group = -NA

|           | d       | Alpha   |
|-----------|---------|---------|
|           | 2.65691 | 0.05    |
| Abs(Dif)- |         |         |
| Level     | LSD     | p-Value |
| 5nM-NA    | -0.98   | 0.8835  |
| -NA       | -1.41   | 1.0000  |
| 5nM+NA    | -1.24   | 0.9973  |
| +NA       | -0.71   | 0.5555  |
| 50nM+NA   | -0.39   | 0.2215  |
| 50nM-NA   | -0.11   | 0.0800  |

Positive values show pairs of means that are significantly different.

**Oneway Analysis of 6-phospho-D-glucono-1,5-lactone By Label****Means Comparisons****Comparisons with a control using Dunnett's Method**

Control Group = -NA

|         |       |
|---------|-------|
| d       | Alpha |
| 2.65691 | 0.05  |

| Level   | Abs(Dif)-<br>LSD | p-Value |
|---------|------------------|---------|
| 5nM+NA  | -1.39            | 0.9380  |
| 5nM-NA  | -1.74            | 0.9998  |
| -NA     | -1.87            | 1.0000  |
| +NA     | -1.18            | 0.7862  |
| 50nM+NA | -0.66            | 0.3134  |
| 50nM-NA | -0.29            | 0.1185  |

Positive values show pairs of means that are significantly different.

**Oneway Analysis of 7-methylguanosine By Label****Means Comparisons****Comparisons with a control using Dunnett's Method**

Control Group = -NA

|           | d       | Alpha    |
|-----------|---------|----------|
|           | 2.65691 | 0.05     |
| Abs(Dif)- |         |          |
| Level     | LSD     | p-Value  |
| 5nM+NA    | -1.04   | 1.0000   |
| +NA       | -1.04   | 1.0000   |
| -NA       | -1.07   | 1.0000   |
| 5nM-NA    | -0.67   | 0.7728   |
| 50nM-NA   | -0.08   | 0.0751   |
| 50nM+NA   | 0.129   | 0.0239 * |

Positive values show pairs of means that are significantly different.

# Oneway Analysis of acetoacetate By Label

## Means Comparisons

### Comparisons with a control using Dunnett's Method

Control Group = -NA

|           | d       | Alpha   |
|-----------|---------|---------|
|           | 2.65691 | 0.05    |
| Abs(Dif)- |         |         |
| Level     | LSD     | p-Value |
| 5nM-NA    | -0.25   | 0.2201  |
| 50nM-NA   | -0.63   | 0.8806  |
| -NA       | -0.91   | 1.0000  |
| 50nM+NA   | -0.55   | 0.7414  |
| 5nM+NA    | -0.32   | 0.3159  |
| +NA       | -0.05   | 0.0711  |

Positive values show pairs of means that are significantly different.

# Oneway Analysis of Acetylcarnitine By Label

## Means Comparisons

### Comparisons with a control using Dunnett's Method

Control Group = -NA

|           | d       | Alpha    |
|-----------|---------|----------|
|           | 2.65691 | 0.05     |
| Abs(Dif)- |         |          |
| Level     | LSD     | p-Value  |
| 50nM+NA   | 0.125   | 0.0117 * |
| 50nM-NA   | -0.24   | 0.4589   |
| -NA       | -0.54   | 1.0000   |
| 5nM+NA    | -0.5    | 0.9997   |
| 5nM-NA    | -0.34   | 0.7604   |
| +NA       | -0.12   | 0.1743   |

Positive values show pairs of means that are significantly different.

# Oneway Analysis of acetyl-CoA By Label

## Means Comparisons

### Comparisons with a control using Dunnett's Method

Control Group = -NA

|           | d       | Alpha    |
|-----------|---------|----------|
|           | 2.65691 | 0.05     |
| Abs(Dif)- |         |          |
| Level     | LSD     | p-Value  |
| -NA       | -0.9    | 1.0000   |
| 50nM-NA   | 0.072   | 0.0306 * |
| 50nM+NA   | 0.17    | 0.0153 * |
| +NA       | 0.217   | 0.0108 * |
| 5nM-NA    | 0.248   | 0.0086 * |
| 5nM+NA    | 0.675   | 0.0003 * |

Positive values show pairs of means that are significantly different.

# Oneway Analysis of Acetyllysine By Label

## Means Comparisons

### Comparisons with a control using Dunnett's Method

Control Group = -NA

|           | d       | Alpha    |
|-----------|---------|----------|
|           | 2.65691 | 0.05     |
| Abs(Dif)- |         |          |
| Level     | LSD     | p-Value  |
| 5nM+NA    | 0.724   | <.0001 * |
| 5nM-NA    | 0.676   | <.0001 * |
| 50nM-NA   | 0.174   | 0.0064 * |
| 50nM+NA   | -0.01   | 0.0559   |
| -NA       | -0.55   | 1.0000   |
| +NA       | -0.34   | 0.7660   |

Positive values show pairs of means that are significantly different.

# Oneway Analysis of aconitate By Label

## Means Comparisons

### Comparisons with a control using Dunnett's Method

Control Group = -NA

|           | d       | Alpha    |
|-----------|---------|----------|
|           | 2.65691 | 0.05     |
| Abs(Dif)- |         |          |
| Level     | LSD     | p-Value  |
| -NA       | -0.9    | 1.0000   |
| 5nM+NA    | -0.06   | 0.0739   |
| +NA       | 0.065   | 0.0323 * |
| 5nM-NA    | 1.13    | <.0001 * |
| 50nM-NA   | 1.282   | <.0001 * |
| 50nM+NA   | 1.387   | <.0001 * |

Positive values show pairs of means that are significantly different.

## Oneway Analysis of Adenine By Label

### Means Comparisons

#### Comparisons with a control using Dunnett's Method

Control Group = -NA

|           | d       | Alpha    |
|-----------|---------|----------|
|           | 2.65691 | 0.05     |
| Abs(Dif)- |         |          |
| Level     | LSD     | p-Value  |
| 50nM+NA   | 3.571   | <.0001 * |
| 50nM-NA   | 2.544   | <.0001 * |
| 5nM-NA    | 0.732   | 0.0009 * |
| 5nM+NA    | -0.09   | 0.0749   |
| -NA       | -1.24   | 1.0000   |
| +NA       | -0.55   | 0.4566   |

Positive values show pairs of means that are significantly different.

# **Oneway Analysis of adenosine By Label**

## **Means Comparisons**

### **Comparisons with a control using Dunnett's Method**

Control Group = -NA

|           | d       | Alpha    |
|-----------|---------|----------|
|           | 2.65691 | 0.05     |
| Abs(Dif)- |         |          |
| Level     | LSD     | p-Value  |
| 50nM+NA   | 0.839   | <.0001 * |
| 50nM-NA   | 0.671   | <.0001 * |
| 5nM-NA    | 0.428   | 0.0005 * |
| 5nM+NA    | 0.168   | 0.0090 * |
| +NA       | -0.45   | 0.9244   |
| -NA       | -0.62   | 1.0000   |

Positive values show pairs of means that are significantly different.

# Oneway Analysis of Adipic acid By Label

## Means Comparisons

### Comparisons with a control using Dunnett's Method

Control Group = -NA

|           | d       | Alpha    |
|-----------|---------|----------|
|           | 2.65691 | 0.05     |
| Abs(Dif)- |         |          |
| Level     | LSD     | p-Value  |
| 50nM-NA   | 0.446   | 0.0012 * |
| +NA       | -0.25   | 0.2709   |
| 50nM+NA   | -0.53   | 0.8498   |
| 5nM+NA    | -0.56   | 0.8882   |
| 5nM-NA    | -0.73   | 0.9997   |
| -NA       | -0.8    | 1.0000   |

Positive values show pairs of means that are significantly different.

# Oneway Analysis of ADP By Label

## Means Comparisons

### Comparisons with a control using Dunnett's Method

Control Group = -NA

|           | d       | Alpha    |
|-----------|---------|----------|
|           | 2.65691 | 0.05     |
| Abs(Dif)- |         |          |
| Level     | LSD     | p-Value  |
| 50nM+NA   | 1.311   | <.0001 * |
| 50nM-NA   | 0.799   | <.0001 * |
| 5nM+NA    | 0.557   | 0.0003 * |
| 5nM-NA    | 0.067   | 0.0284 * |
| +NA       | -0.61   | 0.9904   |
| -NA       | -0.73   | 1.0000   |

Positive values show pairs of means that are significantly different.

|                                                               |
|---------------------------------------------------------------|
| <b>Oneway Analysis of AICAR 3,5-Cyclic Phosphate By Label</b> |
|---------------------------------------------------------------|

|                          |
|--------------------------|
| <b>Means Comparisons</b> |
|--------------------------|

|                                                          |
|----------------------------------------------------------|
| <b>Comparisons with a control using Dunnett's Method</b> |
|----------------------------------------------------------|

Control Group = -NA

|           | d       | Alpha    |
|-----------|---------|----------|
|           | 2.65691 | 0.05     |
| Abs(Dif)- |         |          |
| Level     | LSD     | p-Value  |
| 50nM+NA   | 1.912   | <.0001 * |
| 50nM-NA   | 1.034   | <.0001 * |
| 5nM+NA    | 0.417   | <.0001 * |
| 5nM-NA    | 0.139   | 0.0038 * |
| -NA       | -0.35   | 1.0000   |
| +NA       | -0.34   | 1.0000   |

Positive values show pairs of means that are significantly different.

# Oneway Analysis of Ala-Ala By Label

## Means Comparisons

### Comparisons with a control using Dunnett's Method

Control Group = -NA

|         |       |
|---------|-------|
| d       | Alpha |
| 2.65691 | 0.05  |

| Level   | Abs(Dif)-<br>LSD | p-Value  |
|---------|------------------|----------|
| 50nM-NA | 0.229            | 0.0026 * |
| 5nM+NA  | -0.25            | 0.5120   |
| 50nM+NA | -0.38            | 0.9266   |
| 5nM-NA  | -0.42            | 0.9872   |
| -NA     | -0.51            | 1.0000   |
| +NA     | -0.51            | 1.0000   |

Positive values show pairs of means that are significantly different.

**Oneway Analysis of Ala-Gly By Label****Means Comparisons****Comparisons with a control using Dunnett's Method**

Control Group = -NA

|         |       |
|---------|-------|
| d       | Alpha |
| 2.65691 | 0.05  |

| Level   | Abs(Dif)-<br>LSD | p-Value |
|---------|------------------|---------|
| 5nM+NA  | -0.49            | 0.2179  |
| 50nM-NA | -1.71            | 1.0000  |
| 50nM+NA | -1.72            | 1.0000  |
| 5nM-NA  | -1.73            | 1.0000  |
| -NA     | -1.79            | 1.0000  |
| +NA     | -1.65            | 0.9997  |

Positive values show pairs of means that are significantly different.

# Oneway Analysis of alanine By Label

## Means Comparisons

### Comparisons with a control using Dunnett's Method

Control Group = -NA

|           | d       | Alpha    |
|-----------|---------|----------|
|           | 2.65691 | 0.05     |
| Abs(Dif)- |         |          |
| Level     | LSD     | p-Value  |
| 50nM-NA   | 1.141   | <.0001 * |
| 50nM+NA   | 1.05    | <.0001 * |
| 5nM-NA    | 0.833   | <.0001 * |
| 5nM+NA    | 0.776   | <.0001 * |
| -NA       | -0.56   | 1.0000   |
| +NA       | -0.48   | 0.9943   |

Positive values show pairs of means that are significantly different.

# Oneway Analysis of allantoate By Label

## Means Comparisons

### Comparisons with a control using Dunnett's Method

Control Group = -NA

|         |       |
|---------|-------|
| d       | Alpha |
| 2.65691 | 0.05  |

| Level   | Abs(Dif)-LSD | p-Value  |
|---------|--------------|----------|
| -NA     | -0.8         | 1.0000   |
| +NA     | 1.913        | <.0001 * |
| 5nM-NA  | 3.46         | <.0001 * |
| 5nM+NA  | 3.991        | <.0001 * |
| 50nM-NA | 4.224        | <.0001 * |
| 50nM+NA | 4.492        | <.0001 * |

Positive values show pairs of means that are significantly different.

# Oneway Analysis of Aminoadipic acid By Label

## Means Comparisons

### Comparisons with a control using Dunnett's Method

Control Group = -NA

|           | d       | Alpha    |
|-----------|---------|----------|
|           | 2.65691 | 0.05     |
| Abs(Dif)- |         |          |
| Level     | LSD     | p-Value  |
| -NA       | -1.03   | 1.0000   |
| +NA       | -0.14   | 0.1084   |
| 50nM-NA   | 0.127   | 0.0234 * |
| 5nM-NA    | 0.328   | 0.0064 * |
| 50nM+NA   | 0.944   | <.0001 * |
| 5nM+NA    | 1.015   | <.0001 * |

Positive values show pairs of means that are significantly different.

# Oneway Analysis of AICAR(ZMP) By Label

## Means Comparisons

### Comparisons with a control using Dunnett's Method

Control Group = -NA

|           | d       | Alpha    |
|-----------|---------|----------|
|           | 2.65691 | 0.05     |
| Abs(Dif)- |         |          |
| Level     | LSD     | p-Value  |
| +NA       | -0.43   | 0.4459   |
| -NA       | -0.98   | 1.0000   |
| 5nM-NA    | 3.136   | <.0001 * |
| 5nM+NA    | 3.765   | <.0001 * |
| 50nM-NA   | 4.316   | <.0001 * |
| 50nM+NA   | 4.443   | <.0001 * |

Positive values show pairs of means that are significantly different.

# Oneway Analysis of Aminomalonic acid By Label

## Means Comparisons

### Comparisons with a control using Dunnett's Method

Control Group = -NA

|         |       |
|---------|-------|
| d       | Alpha |
| 2.65691 | 0.05  |

| Level   | Abs(Dif)-<br>LSD | p-Value  |
|---------|------------------|----------|
| +NA     | 2.383            | 0.0006 * |
| 5nM+NA  | 1.926            | 0.0014 * |
| 50nM+NA | -0.41            | 0.0959   |
| 50nM-NA | -2.29            | 0.7994   |
| 5nM-NA  | -3.09            | 0.9950   |
| -NA     | -3.59            | 1.0000   |

Positive values show pairs of means that are significantly different.

# Oneway Analysis of AMP By Label

## Means Comparisons

### Comparisons with a control using Dunnett's Method

Control Group = -NA

|           | d       | Alpha    |
|-----------|---------|----------|
|           | 2.65691 | 0.05     |
| Abs(Dif)- |         |          |
| Level     | LSD     | p-Value  |
| 50nM+NA   | 2.488   | <.0001 * |
| 50nM-NA   | 2.142   | <.0001 * |
| 5nM-NA    | 1.31    | <.0001 * |
| 5nM+NA    | 0.696   | <.0001 * |
| -NA       | -0.45   | 1.0000   |
| +NA       | -0.37   | 0.9861   |

Positive values show pairs of means that are significantly different.

**Oneway Analysis of Anhydrosorbitol By Label****Means Comparisons****Comparisons with a control using Dunnett's Method**

Control Group = -NA

|         |       |
|---------|-------|
| d       | Alpha |
| 2.65691 | 0.05  |

| Level   | Abs(Dif)-<br>LSD | p-Value |
|---------|------------------|---------|
| 5nM+NA  | -2.2             | 0.3609  |
| +NA     | -5.35            | 0.9999  |
| 5nM-NA  | -5.43            | 1.0000  |
| -NA     | -5.69            | 1.0000  |
| 50nM-NA | -3.88            | 0.8640  |
| 50nM+NA | -3.24            | 0.6766  |

Positive values show pairs of means that are significantly different.

# Oneway Analysis of Arabitol By Label

## Means Comparisons

### Comparisons with a control using Dunnett's Method

Control Group = -NA

|         |       |
|---------|-------|
| d       | Alpha |
| 2.65691 | 0.05  |

| Level   | Abs(Dif)-<br>LSD | p-Value |
|---------|------------------|---------|
| 50nM-NA | -0.94            | 0.2168  |
| 5nM-NA  | -3.32            | 1.0000  |
| -NA     | -3.45            | 1.0000  |
| 50nM+NA | -2.16            | 0.7787  |
| 5nM+NA  | -1.91            | 0.6495  |
| +NA     | -0.27            | 0.0792  |

Positive values show pairs of means that are significantly different.

## Oneway Analysis of Arginine By Label

### Means Comparisons

#### Comparisons with a control using Dunnett's Method

Control Group = -NA

|           | d       | Alpha    |
|-----------|---------|----------|
|           | 2.65691 | 0.05     |
| Abs(Dif)- |         |          |
| Level     | LSD     | p-Value  |
| 5nM+NA    | 4.53    | <.0001 * |
| 50nM+NA   | 4.403   | <.0001 * |
| +NA       | -0.24   | 0.0970   |
| 5nM-NA    | -0.43   | 0.1573   |
| 50nM-NA   | -1.1    | 0.6057   |
| -NA       | -2.06   | 1.0000   |

Positive values show pairs of means that are significantly different.

# Oneway Analysis of Asparagine By Label

## Means Comparisons

### Comparisons with a control using Dunnett's Method

Control Group = -NA

|           | d       | Alpha    |
|-----------|---------|----------|
|           | 2.65691 | 0.05     |
| Abs(Dif)- |         |          |
| Level     | LSD     | p-Value  |
| 5nM+NA    | 1.447   | 0.0003 * |
| 50nM+NA   | 0.916   | 0.0020 * |
| 50nM-NA   | -0.29   | 0.1182   |
| 5nM-NA    | -1.27   | 0.8552   |
| +NA       | -1.7    | 0.9992   |
| -NA       | -1.89   | 1.0000   |

Positive values show pairs of means that are significantly different.

# Oneway Analysis of aspartate By Label

## Means Comparisons

### Comparisons with a control using Dunnett's Method

Control Group = -NA

|           | d       | Alpha    |
|-----------|---------|----------|
|           | 2.65691 | 0.05     |
| Abs(Dif)- |         |          |
| Level     | LSD     | p-Value  |
| 50nM+NA   | 3.328   | <.0001 * |
| 50nM-NA   | 3.219   | <.0001 * |
| 5nM+NA    | 2.43    | <.0001 * |
| 5nM-NA    | 2.394   | <.0001 * |
| -NA       | -0.44   | 1.0000   |
| +NA       | -0.39   | 0.9977   |

Positive values show pairs of means that are significantly different.

# Oneway Analysis of ATP By Label

## Means Comparisons

### Comparisons with a control using Dunnett's Method

Control Group = -NA

|           | d       | Alpha    |
|-----------|---------|----------|
|           | 2.65691 | 0.05     |
| Abs(Dif)- |         |          |
| Level     | LSD     | p-Value  |
| 5nM-NA    | 1.398   | 0.0001 * |
| 50nM-NA   | -0.44   | 0.2109   |
| -NA       | -1.64   | 1.0000   |
| 5nM+NA    | 0.542   | 0.0059 * |
| +NA       | 0.761   | 0.0023 * |
| 50nM+NA   | 0.797   | 0.0020 * |

Positive values show pairs of means that are significantly different.

# Oneway Analysis of Atrolactic acid By Label

## Means Comparisons

### Comparisons with a control using Dunnett's Method

Control Group = -NA

|           | d       | Alpha    |
|-----------|---------|----------|
|           | 2.65691 | 0.05     |
| Abs(Dif)- |         |          |
| Level     | LSD     | p-Value  |
| -NA       | -1      | 1.0000   |
| +NA       | 0.279   | 0.0084 * |
| 5nM+NA    | 1.694   | <.0001 * |
| 5nM-NA    | 1.725   | <.0001 * |
| 50nM-NA   | 2.113   | <.0001 * |
| 50nM+NA   | 2.282   | <.0001 * |

Positive values show pairs of means that are significantly different.

**Oneway Analysis of Benzoic acid By Label****Means Comparisons****Comparisons with a control using Dunnett's Method**

Control Group = -NA

|         |       |
|---------|-------|
| d       | Alpha |
| 2.65691 | 0.05  |

| Level   | Abs(Dif)-<br>LSD | p-Value |
|---------|------------------|---------|
| 50nM-NA | -1.24            | 0.6791  |
| 5nM-NA  | -1.58            | 0.9186  |
| 5nM+NA  | -1.58            | 0.9206  |
| 50nM+NA | -1.62            | 0.9379  |
| +NA     | -1.97            | 0.9991  |
| -NA     | -2.18            | 1.0000  |

Positive values show pairs of means that are significantly different.

**Oneway Analysis of beta-Alanine By Label****Means Comparisons****Comparisons with a control using Dunnett's Method**

Control Group = -NA

|         |       |
|---------|-------|
| d       | Alpha |
| 2.65691 | 0.05  |

| Level   | Abs(Dif)-<br>LSD | p-Value |
|---------|------------------|---------|
| +NA     | -1.89            | 0.9787  |
| -NA     | -2.34            | 1.0000  |
| 50nM-NA | -1.96            | 0.9900  |
| 5nM-NA  | -0.67            | 0.2310  |
| 5nM+NA  | -0.67            | 0.2310  |
| 50nM+NA | -0.67            | 0.2310  |

Positive values show pairs of means that are significantly different.

**Oneway Analysis of beta-D-Glucopyranose By Label****Means Comparisons****Comparisons with a control using Dunnett's Method**

Control Group = -NA

|         |       |
|---------|-------|
| d       | Alpha |
| 2.65691 | 0.05  |

| Level   | Abs(Dif)-<br>LSD | p-Value |
|---------|------------------|---------|
| 5nM-NA  | -0.78            | 0.9986  |
| 5nM+NA  | -0.8             | 0.9996  |
| -NA     | -0.87            | 1.0000  |
| 50nM-NA | -0.86            | 1.0000  |
| 50nM+NA | -0.64            | 0.9257  |
| +NA     | -0.37            | 0.4144  |

Positive values show pairs of means that are significantly different.

# Oneway Analysis of betaine By Label

## Means Comparisons

### Comparisons with a control using Dunnett's Method

Control Group = -NA

|         |       |
|---------|-------|
| d       | Alpha |
| 2.65691 | 0.05  |

| Level   | Abs(Dif)-<br>LSD | p-Value  |
|---------|------------------|----------|
| 5nM-NA  | 0.246            | 0.0031 * |
| 50nM-NA | -0.37            | 0.8062   |
| -NA     | -0.58            | 1.0000   |
| 5nM+NA  | -0.14            | 0.1934   |
| 50nM+NA | 0.27             | 0.0023 * |
| +NA     | 0.571            | <.0001 * |

Positive values show pairs of means that are significantly different.

**Oneway Analysis of betaine aldehyde By Label****Means Comparisons****Comparisons with a control using Dunnett's Method**

Control Group = -NA

|         |       |
|---------|-------|
| d       | Alpha |
| 2.65691 | 0.05  |

| Level   | Abs(Dif)-<br>LSD | p-Value |
|---------|------------------|---------|
| 5nM-NA  | -0.59            | 0.5840  |
| 5nM+NA  | -0.87            | 0.9599  |
| 50nM-NA | -0.98            | 0.9956  |
| -NA     | -1.13            | 1.0000  |
| +NA     | -0.68            | 0.7319  |
| 50nM+NA | -0.43            | 0.3513  |

Positive values show pairs of means that are significantly different.

# Oneway Analysis of Butyrylcarnitine By Label

## Means Comparisons

### Comparisons with a control using Dunnett's Method

Control Group = -NA

|           | d       | Alpha    |
|-----------|---------|----------|
|           | 2.65691 | 0.05     |
| Abs(Dif)- |         |          |
| Level     | LSD     | p-Value  |
| -NA       | -0.57   | 1.0000   |
| +NA       | 1.42    | <.0001 * |
| 5nM-NA    | 2.529   | <.0001 * |
| 5nM+NA    | 3.523   | <.0001 * |
| 50nM-NA   | 4.022   | <.0001 * |
| 50nM+NA   | 4.24    | <.0001 * |

Positive values show pairs of means that are significantly different.

**Oneway Analysis of Carbamoyl phosphate By Label****Means Comparisons****Comparisons with a control using Dunnett's Method**

Control Group = -NA

|           | d       | Alpha    |
|-----------|---------|----------|
|           | 2.65691 | 0.05     |
| Abs(Dif)- |         |          |
| Level     | LSD     | p-Value  |
| 50nM-NA   | 0.119   | 0.0135 * |
| 50nM+NA   | -0.07   | 0.1004   |
| 5nM+NA    | -0.29   | 0.5664   |
| 5nM-NA    | -0.55   | 1.0000   |
| -NA       | -0.57   | 1.0000   |
| +NA       | -0.03   | 0.0705   |

Positive values show pairs of means that are significantly different.

# Oneway Analysis of carnitine By Label

## Means Comparisons

### Comparisons with a control using Dunnett's Method

Control Group = -NA

|           | d       | Alpha    |
|-----------|---------|----------|
|           | 2.65691 | 0.05     |
| Abs(Dif)- |         |          |
| Level     | LSD     | p-Value  |
| 5nM-NA    | 1.552   | <.0001 * |
| 50nM-NA   | 1.365   | <.0001 * |
| 5nM+NA    | 1.168   | <.0001 * |
| 50nM+NA   | 0.872   | <.0001 * |
| +NA       | -0.38   | 1.0000   |
| -NA       | -0.39   | 1.0000   |

Positive values show pairs of means that are significantly different.

**Oneway Analysis of CDP By Label****Means Comparisons****Comparisons with a control using Dunnett's Method**

Control Group = -NA

|         |       |
|---------|-------|
| d       | Alpha |
| 2.65691 | 0.05  |

| Level   | Abs(Dif)-<br>LSD | p-Value |
|---------|------------------|---------|
| 50nM-NA | -0.13            | 0.1036  |
| 5nM-NA  | -0.3             | 0.2339  |
| 50nM+NA | -0.33            | 0.2619  |
| 5nM+NA  | -0.72            | 0.8727  |
| -NA     | -1.05            | 1.0000  |
| +NA     | -0.86            | 0.9851  |

Positive values show pairs of means that are significantly different.

## Oneway Analysis of Cholesterol By Label

### Means Comparisons

#### Comparisons with a control using Dunnett's Method

Control Group = -NA

|           | d       | Alpha    |
|-----------|---------|----------|
|           | 2.65691 | 0.05     |
| Abs(Dif)- |         |          |
| Level     | LSD     | p-Value  |
| 50nM+NA   | 1.043   | 0.0026 * |
| +NA       | -1      | 0.4288   |
| 5nM+NA    | -1.5    | 0.8075   |
| 50nM-NA   | -2.03   | 0.9969   |
| -NA       | -2.32   | 1.0000   |
| 5nM-NA    | -2.13   | 0.9996   |

Positive values show pairs of means that are significantly different.

**Oneway Analysis of choline By Label****Means Comparisons****Comparisons with a control using Dunnett's Method**

Control Group = -NA

|         |       |
|---------|-------|
| d       | Alpha |
| 2.65691 | 0.05  |

| Level   | Abs(Dif)-<br>LSD | p-Value |
|---------|------------------|---------|
| 50nM-NA | -0.29            | 0.3843  |
| 50nM+NA | -0.33            | 0.4679  |
| 5nM-NA  | -0.6             | 0.9858  |
| 5nM+NA  | -0.7             | 1.0000  |
| -NA     | -0.73            | 1.0000  |
| +NA     | -0.27            | 0.3356  |

Positive values show pairs of means that are significantly different.

# Oneway Analysis of Chondroitin By Label

## Means Comparisons

### Comparisons with a control using Dunnett's Method

Control Group = -NA

|         |       |
|---------|-------|
| d       | Alpha |
| 2.65691 | 0.05  |

| Level   | Abs(Dif)-<br>LSD | p-Value  |
|---------|------------------|----------|
| 5nM+NA  | -1.2             | 0.9905   |
| 50nM+NA | -1.35            | 0.9999   |
| -NA     | -1.43            | 1.0000   |
| 5nM-NA  | -0.68            | 0.5091   |
| 50nM-NA | -0.44            | 0.2592   |
| +NA     | 0.157            | 0.0255 * |

Positive values show pairs of means that are significantly different.

# Oneway Analysis of Citric acid By Label

## Means Comparisons

### Comparisons with a control using Dunnett's Method

Control Group = -NA

|           | d       | Alpha    |
|-----------|---------|----------|
|           | 2.65691 | 0.05     |
| Abs(Dif)- |         |          |
| Level     | LSD     | p-Value  |
| +NA       | 0.348   | 0.0273 * |
| 5nM+NA    | -3.47   | 1.0000   |
| -NA       | -3.52   | 1.0000   |
| 50nM+NA   | -2.99   | 0.9932   |
| 50nM-NA   | -2.33   | 0.8370   |
| 5nM-NA    | 1.411   | 0.0036 * |

Positive values show pairs of means that are significantly different.

# Oneway Analysis of citrulline By Label

## Means Comparisons

### Comparisons with a control using Dunnett's Method

Control Group = -NA

|         |       |
|---------|-------|
| d       | Alpha |
| 2.65691 | 0.05  |

| Level   | Abs(Dif)-<br>LSD | p-Value  |
|---------|------------------|----------|
| +NA     | 0.489            | 0.0003 * |
| 5nM+NA  | -0.02            | 0.0616   |
| -NA     | -0.65            | 1.0000   |
| 5nM-NA  | -0.46            | 0.9088   |
| 50nM+NA | -0.14            | 0.1689   |
| 50nM-NA | 0.423            | 0.0006 * |

Positive values show pairs of means that are significantly different.

**Oneway Analysis of CMP By Label****Means Comparisons****Comparisons with a control using Dunnett's Method**

Control Group = -NA

|           | d       | Alpha    |
|-----------|---------|----------|
|           | 2.65691 | 0.05     |
| Abs(Dif)- |         |          |
| Level     | LSD     | p-Value  |
| 5nM-NA    | -0.47   | 0.5855   |
| 5nM+NA    | -0.73   | 0.9792   |
| -NA       | -0.91   | 1.0000   |
| +NA       | -0.69   | 0.9520   |
| 50nM-NA   | 0.173   | 0.0152 * |
| 50nM+NA   | 0.409   | 0.0026 * |

Positive values show pairs of means that are significantly different.

|                                                                |
|----------------------------------------------------------------|
| <b>Oneway Analysis of CMP-N-acetylneuraminic acid By Label</b> |
|----------------------------------------------------------------|

|                          |
|--------------------------|
| <b>Means Comparisons</b> |
|--------------------------|

|                                                          |
|----------------------------------------------------------|
| <b>Comparisons with a control using Dunnett's Method</b> |
|----------------------------------------------------------|

Control Group = -NA

|           | d       | Alpha    |
|-----------|---------|----------|
|           | 2.65691 | 0.05     |
| Abs(Dif)- |         |          |
| Level     | LSD     | p-Value  |
| +NA       | 0.678   | 0.0015 * |
| -NA       | -1.29   | 1.0000   |
| 50nM+NA   | -0.9    | 0.8928   |
| 5nM+NA    | -0.75   | 0.6977   |
| 5nM-NA    | -0.02   | 0.0554   |
| 50nM-NA   | 0.172   | 0.0219 * |

Positive values show pairs of means that are significantly different.

# Oneway Analysis of creatine By Label

## Means Comparisons

### Comparisons with a control using Dunnett's Method

Control Group = -NA

|           | d       | Alpha    |
|-----------|---------|----------|
|           | 2.65691 | 0.05     |
| Abs(Dif)- |         |          |
| Level     | LSD     | p-Value  |
| 5nM-NA    | 0.492   | 0.0004 * |
| 5nM+NA    | 0.256   | 0.0047 * |
| 50nM-NA   | 0.098   | 0.0211 * |
| 50nM+NA   | 0.017   | 0.0432 * |
| -NA       | -0.7    | 1.0000   |
| +NA       | -0.51   | 0.9216   |

Positive values show pairs of means that are significantly different.

# Oneway Analysis of Creatinine By Label

## Means Comparisons

### Comparisons with a control using Dunnett's Method

Control Group = -NA

|           | d       | Alpha    |
|-----------|---------|----------|
|           | 2.65691 | 0.05     |
| Abs(Dif)- |         |          |
| Level     | LSD     | p-Value  |
| 50nM+NA   | 1.843   | <.0001 * |
| 50nM-NA   | 1.538   | <.0001 * |
| 5nM+NA    | 0.932   | <.0001 * |
| 5nM-NA    | 0.258   | 0.0011 * |
| +NA       | 0.03    | 0.0335 * |
| -NA       | -0.46   | 1.0000   |

Positive values show pairs of means that are significantly different.

# Oneway Analysis of Cyclic ADP-ribose By Label

## Means Comparisons

### Comparisons with a control using Dunnett's Method

Control Group = -NA

|           | d       | Alpha    |
|-----------|---------|----------|
|           | 2.65691 | 0.05     |
| Abs(Dif)- |         |          |
| Level     | LSD     | p-Value  |
| +NA       | -0.48   | 0.6942   |
| -NA       | -0.82   | 1.0000   |
| 5nM+NA    | 4.653   | <.0001 * |
| 50nM+NA   | 4.672   | <.0001 * |
| 5nM-NA    | 4.805   | <.0001 * |
| 50nM-NA   | 4.87    | <.0001 * |

Positive values show pairs of means that are significantly different.

**Oneway Analysis of cyclic-AMP By Label****Means Comparisons****Comparisons with a control using Dunnett's Method**

Control Group = -NA

|         |       |
|---------|-------|
| d       | Alpha |
| 2.65691 | 0.05  |

| Level   | Abs(Dif)-LSD | p-Value  |
|---------|--------------|----------|
| -NA     | -0.96        | 1.0000   |
| +NA     | -0.69        | 0.9192   |
| 5nM-NA  | -0.02        | 0.0570   |
| 50nM-NA | -4e-3        | 0.0513   |
| 5nM+NA  | 0.125        | 0.0223 * |
| 50nM+NA | 0.599        | 0.0007 * |

Positive values show pairs of means that are significantly different.

# Oneway Analysis of cystathionine By Label

## Means Comparisons

### Comparisons with a control using Dunnett's Method

Control Group = -NA

|d|      Alpha  
2.65691      0.05

| Level   | Abs(Dif)-<br>LSD | p-Value  |
|---------|------------------|----------|
| -NA     | -0.9             | 1.0000   |
| +NA     | 0.073            | 0.0304 * |
| 50nM+NA | 1.452            | <.0001 * |
| 50nM-NA | 1.459            | <.0001 * |
| 5nM-NA  | 1.6              | <.0001 * |
| 5nM+NA  | 1.767            | <.0001 * |

Positive values show pairs of means that are significantly different.

# Oneway Analysis of Cysteineglutathione disulfide By Label

## Means Comparisons

### Comparisons with a control using Dunnett's Method

Control Group = -NA

|           | d       | Alpha    |
|-----------|---------|----------|
|           | 2.65691 | 0.05     |
| Abs(Dif)- |         |          |
| Level     | LSD     | p-Value  |
| +NA       | 1.843   | <.0001 * |
| -NA       | -0.6    | 1.0000   |
| 5nM+NA    | 0.15    | 0.0101 * |
| 5nM-NA    | 1.189   | <.0001 * |
| 50nM-NA   | 3.011   | <.0001 * |
| 50nM+NA   | 3.063   | <.0001 * |

Positive values show pairs of means that are significantly different.

**Oneway Analysis of Cystine By Label****Means Comparisons****Comparisons with a control using Dunnett's Method**

Control Group = -NA

|         |       |
|---------|-------|
| d       | Alpha |
| 2.65691 | 0.05  |

| Level   | Abs(Dif)-<br>LSD | p-Value  |
|---------|------------------|----------|
| 5nM-NA  | -0.94            | 0.9991   |
| -NA     | -1.04            | 1.0000   |
| +NA     | -0.08            | 0.0800   |
| 5nM+NA  | -0.04            | 0.0612   |
| 50nM-NA | 1.318            | <.0001 * |
| 50nM+NA | 2.62             | <.0001 * |

Positive values show pairs of means that are significantly different.

# Oneway Analysis of cytidine By Label

## Means Comparisons

### Comparisons with a control using Dunnett's Method

Control Group = -NA

|           | d       | Alpha    |
|-----------|---------|----------|
|           | 2.65691 | 0.05     |
| Abs(Dif)- |         |          |
| Level     | LSD     | p-Value  |
| 50nM+NA   | 4.089   | <.0001 * |
| 50nM-NA   | 2.877   | <.0001 * |
| 5nM+NA    | 1.664   | <.0001 * |
| 5nM-NA    | 1.649   | <.0001 * |
| +NA       | -0.63   | 1.0000   |
| -NA       | -0.65   | 1.0000   |

Positive values show pairs of means that are significantly different.

**Oneway Analysis of cytosine By Label****Means Comparisons****Comparisons with a control using Dunnett's Method**

Control Group = -NA

|           | d       | Alpha    |
|-----------|---------|----------|
|           | 2.65691 | 0.05     |
| Abs(Dif)- |         |          |
| Level     | LSD     | p-Value  |
| 5nM+NA    | 0.213   | 0.0101 * |
| 5nM-NA    | -0.07   | 0.0830   |
| 50nM-NA   | -0.13   | 0.1174   |
| 50nM+NA   | -0.29   | 0.2958   |
| -NA       | -0.85   | 1.0000   |
| +NA       | 0.043   | 0.0367 * |

Positive values show pairs of means that are significantly different.

# Oneway Analysis of dAMP By Label

## Means Comparisons

### Comparisons with a control using Dunnett's Method

Control Group = -NA

|         |       |
|---------|-------|
| d       | Alpha |
| 2.65691 | 0.05  |

| Level   | Abs(Dif)-LSD | p-Value  |
|---------|--------------|----------|
| -NA     | -0.42        | 1.0000   |
| +NA     | 0.6          | <.0001 * |
| 5nM-NA  | 3.83         | <.0001 * |
| 50nM-NA | 3.83         | <.0001 * |
| 5nM+NA  | 3.83         | <.0001 * |
| 50nM+NA | 3.83         | <.0001 * |

Positive values show pairs of means that are significantly different.

# Oneway Analysis of dCMP By Label

## Means Comparisons

### Comparisons with a control using Dunnett's Method

Control Group = -NA

|           | d       | Alpha    |
|-----------|---------|----------|
|           | 2.65691 | 0.05     |
| Abs(Dif)- |         |          |
| Level     | LSD     | p-Value  |
| 5nM-NA    | 1.289   | <.0001 * |
| 5nM+NA    | 0.501   | 0.0009 * |
| +NA       | -0.5    | 0.7397   |
| -NA       | -0.84   | 1.0000   |
| 50nM-NA   | -0.04   | 0.0684   |
| 50nM+NA   | 0.461   | 0.0012 * |

Positive values show pairs of means that are significantly different.

# Oneway Analysis of deoxyadenosine By Label

## Means Comparisons

### Comparisons with a control using Dunnett's Method

Control Group = -NA

|           | d       | Alpha    |
|-----------|---------|----------|
|           | 2.65691 | 0.05     |
| Abs(Dif)- |         |          |
| Level     | LSD     | p-Value  |
| 5nM+NA    | -0.01   | 0.0564   |
| +NA       | -0.4    | 0.6490   |
| -NA       | -0.72   | 1.0000   |
| 5nM-NA    | -0.53   | 0.9227   |
| 50nM+NA   | -0.11   | 0.1169   |
| 50nM-NA   | 0.041   | 0.0356 * |

Positive values show pairs of means that are significantly different.

|                                                               |
|---------------------------------------------------------------|
| <b>Oneway Analysis of Deoxyheptulose-7-phosphate By Label</b> |
|---------------------------------------------------------------|

|                          |
|--------------------------|
| <b>Means Comparisons</b> |
|--------------------------|

|                                                          |
|----------------------------------------------------------|
| <b>Comparisons with a control using Dunnett's Method</b> |
|----------------------------------------------------------|

Control Group = -NA

|           | d       | Alpha    |
|-----------|---------|----------|
|           | 2.65691 | 0.05     |
| Abs(Dif)- |         |          |
| Level     | LSD     | p-Value  |
| +NA       | -0.36   | 0.6229   |
| -NA       | -0.67   | 1.0000   |
| 5nM+NA    | -0.36   | 0.6173   |
| 50nM-NA   | 0.565   | 0.0001 * |
| 5nM-NA    | 0.59    | 0.0001 * |
| 50nM+NA   | 0.791   | <.0001 * |

Positive values show pairs of means that are significantly different.

# Oneway Analysis of deoxyinosine By Label

## Means Comparisons

### Comparisons with a control using Dunnett's Method

Control Group = -NA

|           | d       | Alpha   |
|-----------|---------|---------|
|           | 2.65691 | 0.05    |
| Abs(Dif)- |         |         |
| Level     | LSD     | p-Value |
| 5nM-NA    | -0.74   | 0.5634  |
| 5nM+NA    | -1.06   | 0.9142  |
| -NA       | -1.47   | 1.0000  |
| +NA       | -1      | 0.8677  |
| 50nM+NA   | -0.98   | 0.8471  |
| 50nM-NA   | -0.62   | 0.4162  |

Positive values show pairs of means that are significantly different.

# Oneway Analysis of deoxyribose-phosphate By Label

## Means Comparisons

### Comparisons with a control using Dunnett's Method

Control Group = -NA

|         |       |
|---------|-------|
| d       | Alpha |
| 2.65691 | 0.05  |

| Level   | Abs(Dif)-LSD | p-Value |
|---------|--------------|---------|
| 5nM+NA  | -0.95        | 0.8959  |
| 50nM-NA | -1.01        | 0.9442  |
| +NA     | -1.11        | 0.9874  |
| 5nM-NA  | -1.16        | 0.9955  |
| -NA     | -1.34        | 1.0000  |
| 50nM+NA | -1.16        | 0.9955  |

Positive values show pairs of means that are significantly different.

**Oneway Analysis of D-erythrose-4-phosphate By Label****Means Comparisons****Comparisons with a control using Dunnett's Method**

Control Group = -NA

|         |       |
|---------|-------|
| d       | Alpha |
| 2.65691 | 0.05  |

| Level   | Abs(Dif)-<br>LSD | p-Value  |
|---------|------------------|----------|
| -NA     | -0.94            | 1.0000   |
| +NA     | 0.314            | 0.0058 * |
| 5nM-NA  | 1.329            | <.0001 * |
| 50nM-NA | 1.708            | <.0001 * |
| 5nM+NA  | 1.994            | <.0001 * |
| 50nM+NA | 2.045            | <.0001 * |

Positive values show pairs of means that are significantly different.

# Oneway Analysis of dGDP By Label

## Means Comparisons

### Comparisons with a control using Dunnett's Method

Control Group = -NA

|           | d       | Alpha    |
|-----------|---------|----------|
|           | 2.65691 | 0.05     |
| Abs(Dif)- |         |          |
| Level     | LSD     | p-Value  |
| 50nM+NA   | 1.009   | <.0001 * |
| 50nM-NA   | 0.955   | <.0001 * |
| 5nM-NA    | 0.837   | <.0001 * |
| 5nM+NA    | 0.75    | <.0001 * |
| -NA       | -0.56   | 1.0000   |
| +NA       | -0.01   | 0.0538   |

Positive values show pairs of means that are significantly different.

**Oneway Analysis of D-gluconate By Label****Means Comparisons****Comparisons with a control using Dunnett's Method**

Control Group = -NA

|         |       |
|---------|-------|
| d       | Alpha |
| 2.65691 | 0.05  |

| Level   | Abs(Dif)-<br>LSD | p-Value  |
|---------|------------------|----------|
| 5nM-NA  | -0.42            | 0.3859   |
| 50nM-NA | -0.58            | 0.6558   |
| 5nM+NA  | -0.93            | 0.9987   |
| -NA     | -1.03            | 1.0000   |
| 50nM+NA | -0.78            | 0.9423   |
| +NA     | 0.001            | 0.0497 * |

Positive values show pairs of means that are significantly different.

|                                                                 |
|-----------------------------------------------------------------|
| <b>Oneway Analysis of D-glyceraldehdye-3-phosphate By Label</b> |
|-----------------------------------------------------------------|

|                          |
|--------------------------|
| <b>Means Comparisons</b> |
|--------------------------|

|                                                          |
|----------------------------------------------------------|
| <b>Comparisons with a control using Dunnett's Method</b> |
|----------------------------------------------------------|

Control Group = -NA

|            |              |
|------------|--------------|
| <b> d </b> | <b>Alpha</b> |
| 2.65691    | 0.05         |

| <b>Level</b> | <b>Abs(Dif)-<br/>LSD</b> | <b>p-Value</b> |
|--------------|--------------------------|----------------|
| 50nM+NA      | 3.797                    | <.0001 *       |
| 50nM-NA      | 3.183                    | <.0001 *       |
| 5nM-NA       | 0.965                    | <.0001 *       |
| 5nM+NA       | 0.848                    | 0.0001 *       |
| -NA          | -0.99                    | 1.0000         |
| +NA          | -0.94                    | 1.0000         |

Positive values show pairs of means that are significantly different.

**Oneway Analysis of dGTP By Label****Means Comparisons****Comparisons with a control using Dunnett's Method**

Control Group = -NA

|           | d       | Alpha   |
|-----------|---------|---------|
|           | 2.65691 | 0.05    |
| Abs(Dif)- |         |         |
| Level     | LSD     | p-Value |
| 5nM-NA    | -0.08   | 0.0718  |
| 5nM+NA    | -0.74   | 0.7508  |
| -NA       | -1.22   | 1.0000  |
| 50nM-NA   | -1.19   | 1.0000  |
| +NA       | -0.7    | 0.6897  |
| 50nM+NA   | -0.12   | 0.0896  |

Positive values show pairs of means that are significantly different.

# Oneway Analysis of dihydroxy-acetone-phosphate By Label

## Means Comparisons

### Comparisons with a control using Dunnett's Method

Control Group = -NA

|           | d       | Alpha    |
|-----------|---------|----------|
|           | 2.65691 | 0.05     |
| Abs(Dif)- |         |          |
| Level     | LSD     | p-Value  |
| -NA       | -1.18   | 1.0000   |
| +NA       | -1.01   | 0.9937   |
| 5nM+NA    | 0.02    | 0.0453 * |
| 5nM-NA    | 0.067   | 0.0355 * |
| 50nM-NA   | 0.627   | 0.0015 * |
| 50nM+NA   | 0.827   | 0.0004 * |

Positive values show pairs of means that are significantly different.

**Oneway Analysis of dimethylglycine By Label****Means Comparisons****Comparisons with a control using Dunnett's Method**

Control Group = -NA

|         |       |
|---------|-------|
| d       | Alpha |
| 2.65691 | 0.05  |

| Level   | Abs(Dif)-<br>LSD | p-Value |
|---------|------------------|---------|
| 50nM-NA | -0.08            | 0.0945  |
| 50nM+NA | -0.17            | 0.1749  |
| 5nM-NA  | -0.63            | 0.9935  |
| 5nM+NA  | -0.65            | 0.9974  |
| -NA     | -0.74            | 1.0000  |
| +NA     | -0.34            | 0.4728  |

Positive values show pairs of means that are significantly different.

**Oneway Analysis of DL-Pipecolic acid By Label****Means Comparisons****Comparisons with a control using Dunnett's Method**

Control Group = -NA

|         |       |
|---------|-------|
| d       | Alpha |
| 2.65691 | 0.05  |

| Level   | Abs(Dif)-LSD | p-Value |
|---------|--------------|---------|
| 5nM-NA  | -0.89        | 0.9948  |
| 5nM+NA  | -0.95        | 0.9995  |
| -NA     | -1.04        | 1.0000  |
| 50nM-NA | -0.48        | 0.4764  |
| +NA     | -0.34        | 0.2826  |
| 50nM+NA | -0.23        | 0.1679  |

Positive values show pairs of means that are significantly different.

# Oneway Analysis of D-Mannitol By Label

## Means Comparisons

### Comparisons with a control using Dunnett's Method

Control Group = -NA

|           | d       | Alpha    |
|-----------|---------|----------|
|           | 2.65691 | 0.05     |
| Abs(Dif)- |         |          |
| Level     | LSD     | p-Value  |
| 5nM-NA    | -0.36   | 0.8603   |
| -NA       | -0.54   | 1.0000   |
| 50nM-NA   | -0.41   | 0.9461   |
| 50nM+NA   | -0.06   | 0.0978   |
| 5nM+NA    | 0.206   | 0.0041 * |
| +NA       | 0.347   | 0.0006 * |

Positive values show pairs of means that are significantly different.

# Oneway Analysis of Sedoheptulose-1-7-bisphosphate By Label

## Means Comparisons

### Comparisons with a control using Dunnett's Method

Control Group = -NA

|           | d       | Alpha    |
|-----------|---------|----------|
|           | 2.65691 | 0.05     |
| Abs(Dif)- |         |          |
| Level     | LSD     | p-Value  |
| 50nM+NA   | 3.684   | <.0001 * |
| 50nM-NA   | 3.536   | <.0001 * |
| 5nM+NA    | 1.524   | <.0001 * |
| 5nM-NA    | 1.271   | <.0001 * |
| -NA       | -0.54   | 1.0000   |
| +NA       | -0.45   | 0.9898   |

Positive values show pairs of means that are significantly different.

## Oneway Analysis of FAD By Label

### Means Comparisons

#### Comparisons with a control using Dunnett's Method

Control Group = -NA

|           | d       | Alpha    |
|-----------|---------|----------|
|           | 2.65691 | 0.05     |
| Abs(Dif)- |         |          |
| Level     | LSD     | p-Value  |
| -NA       | -0.94   | 1.0000   |
| +NA       | -0.84   | 0.9985   |
| 5nM+NA    | -0.53   | 0.6609   |
| 5nM-NA    | -0.28   | 0.2459   |
| 50nM+NA   | 0.08    | 0.0297 * |
| 50nM-NA   | 0.279   | 0.0075 * |

Positive values show pairs of means that are significantly different.

**Oneway Analysis of folate By Label****Means Comparisons****Comparisons with a control using Dunnett's Method**

Control Group = -NA

|           | d       | Alpha   |
|-----------|---------|---------|
|           | 2.65691 | 0.05    |
| Abs(Dif)- |         |         |
| Level     | LSD     | p-Value |
| 5nM-NA    | -0.75   | 0.8899  |
| 5nM+NA    | -0.91   | 0.9928  |
| -NA       | -1.08   | 1.0000  |
| +NA       | -0.68   | 0.7838  |
| 50nM+NA   | -0.55   | 0.5765  |
| 50nM-NA   | -0.36   | 0.2831  |

Positive values show pairs of means that are significantly different.

|                                                              |
|--------------------------------------------------------------|
| <b>Oneway Analysis of fructose-1,6-bisphosphate By Label</b> |
|--------------------------------------------------------------|

|                          |
|--------------------------|
| <b>Means Comparisons</b> |
|--------------------------|

|                                                          |
|----------------------------------------------------------|
| <b>Comparisons with a control using Dunnett's Method</b> |
|----------------------------------------------------------|

Control Group = -NA

|           | d       | Alpha    |
|-----------|---------|----------|
|           | 2.65691 | 0.05     |
| Abs(Dif)- |         |          |
| Level     | LSD     | p-Value  |
| 50nM-NA   | 3.992   | <.0001 * |
| 50nM+NA   | 3.957   | <.0001 * |
| 5nM+NA    | 0.754   | <.0001 * |
| 5nM-NA    | 0.668   | <.0001 * |
| +NA       | -0.58   | 1.0000   |
| -NA       | -0.58   | 1.0000   |

Positive values show pairs of means that are significantly different.

# Oneway Analysis of fructose-6-phosphate By Label

## Means Comparisons

### Comparisons with a control using Dunnett's Method

Control Group = -NA

|           | d       | Alpha    |
|-----------|---------|----------|
|           | 2.65691 | 0.05     |
| Abs(Dif)- |         |          |
| Level     | LSD     | p-Value  |
| 50nM-NA   | 3.969   | <.0001 * |
| 50nM+NA   | 3.915   | <.0001 * |
| 5nM+NA    | 0.756   | <.0001 * |
| 5nM-NA    | 0.594   | <.0001 * |
| -NA       | -0.44   | 1.0000   |
| +NA       | -0.44   | 1.0000   |

Positive values show pairs of means that are significantly different.

**Oneway Analysis of fumarate By Label****Means Comparisons****Comparisons with a control using Dunnett's Method**

Control Group = -NA

|         |       |
|---------|-------|
| d       | Alpha |
| 2.65691 | 0.05  |

| Level   | Abs(Dif)-<br>LSD | p-Value  |
|---------|------------------|----------|
| 5nM+NA  | 0.975            | 0.0001 * |
| 5nM-NA  | 0.752            | 0.0006 * |
| +NA     | -0.06            | 0.0681   |
| 50nM+NA | -1.13            | 1.0000   |
| -NA     | -1.14            | 1.0000   |
| 50nM-NA | -1.07            | 0.9999   |

Positive values show pairs of means that are significantly different.

# Oneway Analysis of Geranyl-PP By Label

## Means Comparisons

### Comparisons with a control using Dunnett's Method

Control Group = -NA

|         |       |
|---------|-------|
| d       | Alpha |
| 2.65691 | 0.05  |

| Level   | Abs(Dif)-LSD | p-Value  |
|---------|--------------|----------|
| 50nM-NA | 1.637        | <.0001 * |
| 50nM+NA | 1.324        | <.0001 * |
| 5nM+NA  | 0.841        | 0.0001 * |
| 5nM-NA  | -0.04        | 0.0655   |
| +NA     | -0.84        | 0.9988   |
| -NA     | -0.94        | 1.0000   |

Positive values show pairs of means that are significantly different.

# Oneway Analysis of Glucaric acid By Label

## Means Comparisons

### Comparisons with a control using Dunnett's Method

Control Group = -NA

|           | d       | Alpha    |
|-----------|---------|----------|
|           | 2.65691 | 0.05     |
| Abs(Dif)- |         |          |
| Level     | LSD     | p-Value  |
| 50nM-NA   | 2.304   | 0.0017 * |
| 5nM+NA    | 0.869   | 0.0151 * |
| +NA       | -1.69   | 0.3360   |
| 50nM+NA   | -2.87   | 0.7852   |
| 5nM-NA    | -4.54   | 1.0000   |
| -NA       | -4.56   | 1.0000   |

Positive values show pairs of means that are significantly different.

# Oneway Analysis of glucono-D-lactone By Label

## Means Comparisons

### Comparisons with a control using Dunnett's Method

Control Group = -NA

|           | d       | Alpha    |
|-----------|---------|----------|
|           | 2.65691 | 0.05     |
| Abs(Dif)- |         |          |
| Level     | LSD     | p-Value  |
| 50nM-NA   | 0.221   | 0.0190 * |
| 5nM-NA    | -0.02   | 0.0534   |
| 5nM+NA    | -0.34   | 0.1836   |
| 50nM+NA   | -0.57   | 0.3851   |
| -NA       | -1.41   | 1.0000   |
| +NA       | -1.19   | 0.9918   |

Positive values show pairs of means that are significantly different.

## Oneway Analysis of Glucose By Label

### Means Comparisons

#### Comparisons with a control using Dunnett's Method

Control Group = -NA

|           | d       | Alpha    |
|-----------|---------|----------|
|           | 2.65691 | 0.05     |
| Abs(Dif)- |         |          |
| Level     | LSD     | p-Value  |
| 5nM-NA    | -1.32   | 1.0000   |
| -NA       | -1.35   | 1.0000   |
| 50nM+NA   | -0.14   | 0.0922   |
| 5nM+NA    | 0.157   | 0.0244 * |
| 50nM-NA   | 0.492   | 0.0047 * |
| +NA       | 0.767   | 0.0011 * |

Positive values show pairs of means that are significantly different.

**Oneway Analysis of glucose-6-phosphate By Label****Means Comparisons****Comparisons with a control using Dunnett's Method**

Control Group = -NA

|         |       |
|---------|-------|
| d       | Alpha |
| 2.65691 | 0.05  |

| Level   | Abs(Dif)-<br>LSD | p-Value |
|---------|------------------|---------|
| 5nM+NA  | -0.17            | 0.1086  |
| +NA     | -0.81            | 0.7865  |
| 5nM-NA  | -1.15            | 0.9991  |
| -NA     | -1.28            | 1.0000  |
| 50nM+NA | -0.75            | 0.7086  |
| 50nM-NA | -0.25            | 0.1457  |

Positive values show pairs of means that are significantly different.

# Oneway Analysis of glutamate By Label

## Means Comparisons

### Comparisons with a control using Dunnett's Method

Control Group = -NA

|           | d       | Alpha   |
|-----------|---------|---------|
|           | 2.65691 | 0.05    |
| Abs(Dif)- |         |         |
| Level     | LSD     | p-Value |
| 50nM+NA   | -0.54   | 0.7700  |
| 5nM-NA    | -0.62   | 0.9116  |
| 50nM-NA   | -0.62   | 0.9145  |
| 5nM+NA    | -0.7    | 0.9812  |
| -NA       | -0.87   | 1.0000  |
| +NA       | -0.35   | 0.3878  |

Positive values show pairs of means that are significantly different.

**Oneway Analysis of glutamine By Label****Means Comparisons****Comparisons with a control using Dunnett's Method**

Control Group = -NA

|           | d       | Alpha   |
|-----------|---------|---------|
|           | 2.65691 | 0.05    |
| Abs(Dif)- |         |         |
| Level     | LSD     | p-Value |
| 5nM-NA    | -0.62   | 0.8562  |
| -NA       | -0.92   | 1.0000  |
| 5nM+NA    | -0.91   | 1.0000  |
| 50nM-NA   | -0.7    | 0.9578  |
| +NA       | -0.4    | 0.4390  |
| 50nM+NA   | -0.1    | 0.0954  |

Positive values show pairs of means that are significantly different.

# Oneway Analysis of glutathione By Label

## Means Comparisons

### Comparisons with a control using Dunnett's Method

Control Group = -NA

|           | d       | Alpha    |
|-----------|---------|----------|
|           | 2.65691 | 0.05     |
| Abs(Dif)- |         |          |
| Level     | LSD     | p-Value  |
| -NA       | -0.64   | 1.0000   |
| 50nM-NA   | -0.45   | 0.8865   |
| 50nM+NA   | -0.21   | 0.2737   |
| +NA       | -0.04   | 0.0719   |
| 5nM-NA    | 0.347   | 0.0014 * |
| 5nM+NA    | 1.052   | <.0001 * |

Positive values show pairs of means that are significantly different.

# Oneway Analysis of glutathione disulfide By Label

## Means Comparisons

### Comparisons with a control using Dunnett's Method

Control Group = -NA

|           | d       | Alpha    |
|-----------|---------|----------|
|           | 2.65691 | 0.05     |
| Abs(Dif)- |         |          |
| Level     | LSD     | p-Value  |
| -NA       | -0.74   | 1.0000   |
| +NA       | -0.21   | 0.2306   |
| 50nM-NA   | 0.117   | 0.0187 * |
| 5nM-NA    | 0.555   | 0.0003 * |
| 50nM+NA   | 0.621   | 0.0002 * |
| 5nM+NA    | 0.721   | <.0001 * |

Positive values show pairs of means that are significantly different.

# Oneway Analysis of Glycerophosphocholine By Label

## Means Comparisons

### Comparisons with a control using Dunnett's Method

Control Group = -NA

|           | d       | Alpha    |
|-----------|---------|----------|
|           | 2.65691 | 0.05     |
| Abs(Dif)- |         |          |
| Level     | LSD     | p-Value  |
| 50nM+NA   | 1.816   | <.0001 * |
| 50nM-NA   | 1.684   | <.0001 * |
| 5nM+NA    | 0.53    | <.0001 * |
| 5nM-NA    | 0.368   | 0.0001 * |
| -NA       | -0.44   | 1.0000   |
| +NA       | -0.2    | 0.4796   |

Positive values show pairs of means that are significantly different.

# Oneway Analysis of glycine By Label

## Means Comparisons

### Comparisons with a control using Dunnett's Method

Control Group = -NA

|d|      Alpha  
2.65691      0.05

| Level   | Abs(Dif)-<br>LSD | p-Value  |
|---------|------------------|----------|
| -NA     | -0.87            | 1.0000   |
| 5nM+NA  | -0.83            | 1.0000   |
| 5nM-NA  | -0.75            | 0.9965   |
| 50nM+NA | -0.72            | 0.9901   |
| 50nM-NA | -0.53            | 0.7485   |
| +NA     | 0.092            | 0.0261 * |

Positive values show pairs of means that are significantly different.

# Oneway Analysis of GMP By Label

## Means Comparisons

### Comparisons with a control using Dunnett's Method

Control Group = -NA

|d|      Alpha  
2.65691      0.05

| Level   | Abs(Dif)-<br>LSD | p-Value  |
|---------|------------------|----------|
| +NA     | 0.419            | 0.0050 * |
| -NA     | -1.18            | 1.0000   |
| 5nM+NA  | -0.29            | 0.1911   |
| 5nM-NA  | 0.172            | 0.0201 * |
| 50nM+NA | 0.212            | 0.0162 * |
| 50nM-NA | 0.428            | 0.0047 * |

Positive values show pairs of means that are significantly different.

# Oneway Analysis of Guanidoacetic acid By Label

## Means Comparisons

### Comparisons with a control using Dunnett's Method

Control Group = -NA

|           | d       | Alpha    |
|-----------|---------|----------|
|           | 2.65691 | 0.05     |
| Abs(Dif)- |         |          |
| Level     | LSD     | p-Value  |
| -NA       | -0.68   | 1.0000   |
| +NA       | -0.17   | 0.1974   |
| 5nM+NA    | 0.74    | <.0001 * |
| 5nM-NA    | 0.822   | <.0001 * |
| 50nM-NA   | 1.159   | <.0001 * |
| 50nM+NA   | 1.279   | <.0001 * |

Positive values show pairs of means that are significantly different.

# Oneway Analysis of histidine By Label

## Means Comparisons

### Comparisons with a control using Dunnett's Method

Control Group = -NA

|           | d       | Alpha    |
|-----------|---------|----------|
|           | 2.65691 | 0.05     |
| Abs(Dif)- |         |          |
| Level     | LSD     | p-Value  |
| 5nM-NA    | 0.656   | <.0001 * |
| 50nM-NA   | 0.644   | <.0001 * |
| 5nM+NA    | 0.281   | 0.0024 * |
| 50nM+NA   | 0.165   | 0.0089 * |
| -NA       | -0.61   | 1.0000   |
| +NA       | -0.12   | 0.1507   |

Positive values show pairs of means that are significantly different.

**Oneway Analysis of homocysteine By Label****Means Comparisons****Comparisons with a control using Dunnett's Method**

Control Group = -NA

|           | d       | Alpha   |
|-----------|---------|---------|
|           | 2.65691 | 0.05    |
| Abs(Dif)- |         |         |
| Level     | LSD     | p-Value |
| +NA       | -0.07   | 0.2942  |
| 5nM-NA    | -0.19   | 0.9956  |
| -NA       | -0.22   | 1.0000  |
| 5nM+NA    | -0.2    | 0.9997  |
| 50nM-NA   | -0.05   | 0.1619  |
| 50nM+NA   | -0.04   | 0.1487  |

Positive values show pairs of means that are significantly different.

# Oneway Analysis of homoserine By Label

## Means Comparisons

### Comparisons with a control using Dunnett's Method

Control Group = -NA

|           | d       | Alpha    |
|-----------|---------|----------|
|           | 2.65691 | 0.05     |
| Abs(Dif)- |         |          |
| Level     | LSD     | p-Value  |
| 50nM-NA   | 0.761   | 0.0019 * |
| 5nM-NA    | -0.3    | 0.1491   |
| +NA       | -0.63   | 0.3885   |
| 5nM+NA    | -0.67   | 0.4350   |
| -NA       | -1.54   | 1.0000   |
| 50nM+NA   | -1.46   | 0.9999   |

Positive values show pairs of means that are significantly different.

**Oneway Analysis of Hydroxyisocaproic acid By Label****Means Comparisons****Comparisons with a control using Dunnett's Method**

Control Group = -NA

|         |       |
|---------|-------|
| d       | Alpha |
| 2.65691 | 0.05  |

| Level   | Abs(Dif)-<br>LSD | p-Value  |
|---------|------------------|----------|
| +NA     | -0.83            | 0.9913   |
| -NA     | -0.99            | 1.0000   |
| 5nM+NA  | 1.404            | <.0001 * |
| 5nM-NA  | 1.447            | <.0001 * |
| 50nM-NA | 1.818            | <.0001 * |
| 50nM+NA | 1.833            | <.0001 * |

Positive values show pairs of means that are significantly different.

**Oneway Analysis of Hydroxylamine By Label****Means Comparisons****Comparisons with a control using Dunnett's Method**

Control Group = -NA

|           | d       | Alpha   |
|-----------|---------|---------|
|           | 2.65691 | 0.05    |
| Abs(Dif)- |         |         |
| Level     | LSD     | p-Value |
| 50nM-NA   | -1.64   | 0.7546  |
| 5nM+NA    | -2.33   | 0.9961  |
| -NA       | -2.69   | 1.0000  |
| +NA       | -2.68   | 1.0000  |
| 50nM+NA   | -1.95   | 0.9197  |
| 5nM-NA    | -1.37   | 0.5695  |

Positive values show pairs of means that are significantly different.

**Oneway Analysis of hydroxyphenylpyruvate By Label****Means Comparisons****Comparisons with a control using Dunnett's Method**

Control Group = -NA

|           | d       | Alpha   |
|-----------|---------|---------|
|           | 2.65691 | 0.05    |
| Abs(Dif)- |         |         |
| Level     | LSD     | p-Value |
| -NA       | -1.69   | 1.0000  |
| 5nM-NA    | -1.3    | 0.9576  |
| 5nM+NA    | -1.04   | 0.7569  |
| 50nM+NA   | -0.95   | 0.6588  |
| 50nM-NA   | -0.62   | 0.3331  |
| +NA       | -0.54   | 0.2731  |

Positive values show pairs of means that are significantly different.

# Oneway Analysis of hydroxyproline By Label

## Means Comparisons

### Comparisons with a control using Dunnett's Method

Control Group = -NA

|d|      Alpha  
2.65691      0.05

| Level   | Abs(Dif)- |          |
|---------|-----------|----------|
|         | LSD       | p-Value  |
| 5nM+NA  | 0.313     | 0.0033 * |
| 50nM+NA | 0.195     | 0.0098 * |
| 50nM-NA | -0.1      | 0.1097   |
| 5nM-NA  | -0.18     | 0.1849   |
| +NA     | -0.6      | 0.9723   |
| -NA     | -0.76     | 1.0000   |

Positive values show pairs of means that are significantly different.

# Oneway Analysis of IDP By Label

## Means Comparisons

### Comparisons with a control using Dunnett's Method

Control Group = -NA

|         |       |
|---------|-------|
| d       | Alpha |
| 2.65691 | 0.05  |

| Level   | Abs(Dif)-<br>LSD | p-Value  |
|---------|------------------|----------|
| 50nM+NA | 1.066            | <.0001 * |
| 50nM-NA | 0.201            | 0.0136 * |
| 5nM+NA  | -0.01            | 0.0519   |
| 5nM-NA  | -0.46            | 0.5086   |
| -NA     | -0.97            | 1.0000   |
| +NA     | -0.35            | 0.3179   |

Positive values show pairs of means that are significantly different.

# Oneway Analysis of Imidazoleacetic acid By Label

## Means Comparisons

### Comparisons with a control using Dunnett's Method

Control Group = -NA

|           | d       | Alpha    |
|-----------|---------|----------|
|           | 2.65691 | 0.05     |
| Abs(Dif)- |         |          |
| Level     | LSD     | p-Value  |
| +NA       | -0.76   | 0.9998   |
| -NA       | -0.82   | 1.0000   |
| 5nM+NA    | 0.001   | 0.0496 * |
| 5nM-NA    | 0.428   | 0.0015 * |
| 50nM-NA   | 0.774   | <.0001 * |
| 50nM+NA   | 1.059   | <.0001 * |

Positive values show pairs of means that are significantly different.

# Oneway Analysis of IMP By Label

## Means Comparisons

### Comparisons with a control using Dunnett's Method

Control Group = -NA

|           | d       | Alpha    |
|-----------|---------|----------|
|           | 2.65691 | 0.05     |
| Abs(Dif)- |         |          |
| Level     | LSD     | p-Value  |
| 50nM+NA   | 2.238   | <.0001 * |
| 50nM-NA   | 1.776   | <.0001 * |
| 5nM-NA    | 0.823   | <.0001 * |
| 5nM+NA    | 0.459   | 0.0007 * |
| -NA       | -0.72   | 1.0000   |
| +NA       | -0.57   | 0.9719   |

Positive values show pairs of means that are significantly different.

# Oneway Analysis of indole By Label

## Means Comparisons

### Comparisons with a control using Dunnett's Method

Control Group = -NA

|           | d       | Alpha    |
|-----------|---------|----------|
|           | 2.65691 | 0.05     |
| Abs(Dif)- |         |          |
| Level     | LSD     | p-Value  |
| 5nM+NA    | 0.59    | 0.0002 * |
| 5nM-NA    | 0.457   | 0.0009 * |
| 50nM-NA   | 0.217   | 0.0081 * |
| 50nM+NA   | 0.051   | 0.0332 * |
| -NA       | -0.76   | 1.0000   |
| +NA       | -0.5    | 0.8269   |

Positive values show pairs of means that are significantly different.

# Oneway Analysis of Indole-3-carboxylic acid By Label

## Means Comparisons

### Comparisons with a control using Dunnett's Method

Control Group = -NA

|d|      Alpha  
2.65691      0.05

| Level   | Abs(Dif)-<br>LSD | p-Value  |
|---------|------------------|----------|
| -NA     | -1.17            | 1.0000   |
| +NA     | -0.5             | 0.4198   |
| 5nM-NA  | 0.462            | 0.0038 * |
| 5nM+NA  | 0.671            | 0.0011 * |
| 50nM+NA | 1.175            | <.0001 * |
| 50nM-NA | 1.178            | <.0001 * |

Positive values show pairs of means that are significantly different.

**Oneway Analysis of Indoleacrylic acid By Label****Means Comparisons****Comparisons with a control using Dunnett's Method**

Control Group = -NA

|         |       |
|---------|-------|
| d       | Alpha |
| 2.65691 | 0.05  |

| Level   | Abs(Dif)-<br>LSD | p-Value |
|---------|------------------|---------|
| 5nM+NA  | -0.17            | 0.1175  |
| 5nM-NA  | -0.17            | 0.1186  |
| 50nM+NA | -0.46            | 0.3980  |
| 50nM-NA | -0.59            | 0.6014  |
| -NA     | -1.12            | 1.0000  |
| +NA     | -0.99            | 0.9983  |

Positive values show pairs of means that are significantly different.

**Oneway Analysis of inosine By Label****Means Comparisons****Comparisons with a control using Dunnett's Method**

Control Group = -NA

|         |       |
|---------|-------|
| d       | Alpha |
| 2.65691 | 0.05  |

| Level   | Abs(Dif)-<br>LSD | p-Value  |
|---------|------------------|----------|
| 5nM-NA  | 2.803            | <.0001 * |
| 50nM-NA | 1.099            | <.0001 * |
| 50nM+NA | -0.34            | 0.3203   |
| 5nM+NA  | -0.42            | 0.4489   |
| -NA     | -0.95            | 1.0000   |
| +NA     | -0.74            | 0.9653   |

Positive values show pairs of means that are significantly different.

**Oneway Analysis of isocitrate By Label****Means Comparisons****Comparisons with a control using Dunnett's Method**

Control Group = -NA

|         |       |
|---------|-------|
| d       | Alpha |
| 2.65691 | 0.05  |

| Level   | Abs(Dif)-<br>LSD | p-Value |
|---------|------------------|---------|
| 5nM-NA  | -2.07            | 1.0000  |
| -NA     | -2.14            | 1.0000  |
| 5nM+NA  | -1.66            | 0.9626  |
| +NA     | -1.51            | 0.8987  |
| 50nM+NA | -1.03            | 0.5136  |
| 50nM-NA | -0.68            | 0.2696  |

Positive values show pairs of means that are significantly different.

**Oneway Analysis of Isoleucine By Label****Means Comparisons****Comparisons with a control using Dunnett's Method**

Control Group = -NA

|         |       |
|---------|-------|
| d       | Alpha |
| 2.65691 | 0.05  |

| Level   | Abs(Dif)-<br>LSD | p-Value  |
|---------|------------------|----------|
| 5nM-NA  | 0.136            | 0.0076 * |
| 50nM+NA | -0.03            | 0.0725   |
| 50nM-NA | -0.18            | 0.3788   |
| 5nM+NA  | -0.3             | 0.8235   |
| -NA     | -0.46            | 1.0000   |
| +NA     | -0.34            | 0.9195   |

Positive values show pairs of means that are significantly different.

# Oneway Analysis of Ketohexanoic acid By Label

## Means Comparisons

### Comparisons with a control using Dunnett's Method

Control Group = -NA

|           | d       | Alpha    |
|-----------|---------|----------|
|           | 2.65691 | 0.05     |
| Abs(Dif)- |         |          |
| Level     | LSD     | p-Value  |
| 5nM-NA    | 2.618   | 0.0003 * |
| +NA       | -0.86   | 0.1843   |
| 5nM+NA    | -1.62   | 0.4608   |
| 50nM+NA   | -2.21   | 0.7555   |
| -NA       | -3.61   | 1.0000   |
| 50nM-NA   | -2.1    | 0.7026   |

Positive values show pairs of means that are significantly different.

# Oneway Analysis of Ketoleucine By Label

## Means Comparisons

### Comparisons with a control using Dunnett's Method

Control Group = -NA

|d|      Alpha  
2.65691      0.05

| Level   | Abs(Dif)-<br>LSD | p-Value  |
|---------|------------------|----------|
| -NA     | -0.99            | 1.0000   |
| +NA     | -0.59            | 0.7269   |
| 5nM-NA  | 0.123            | 0.0234 * |
| 5nM+NA  | 0.828            | 0.0002 * |
| 50nM+NA | 1.056            | <.0001 * |
| 50nM-NA | 1.501            | <.0001 * |

Positive values show pairs of means that are significantly different.

# Oneway Analysis of Kynurenic acid By Label

## Means Comparisons

### Comparisons with a control using Dunnett's Method

Control Group = -NA

|           | d       | Alpha    |
|-----------|---------|----------|
|           | 2.65691 | 0.05     |
| Abs(Dif)- |         |          |
| Level     | LSD     | p-Value  |
| -NA       | -0.32   | 1.0000   |
| +NA       | 0.187   | 0.0010 * |
| 5nM-NA    | 1.311   | <.0001 * |
| 5nM+NA    | 1.347   | <.0001 * |
| 50nM-NA   | 1.397   | <.0001 * |
| 50nM+NA   | 1.589   | <.0001 * |

Positive values show pairs of means that are significantly different.

**Oneway Analysis of Kynurenine By Label****Means Comparisons****Comparisons with a control using Dunnett's Method**

Control Group = -NA

|         |       |
|---------|-------|
| d       | Alpha |
| 2.65691 | 0.05  |

| Level   | Abs(Dif)-LSD | p-Value |
|---------|--------------|---------|
| 5nM-NA  | -0.08        | 0.0777  |
| 5nM+NA  | -0.33        | 0.2779  |
| 50nM+NA | -0.63        | 0.7876  |
| 50nM-NA | -0.64        | 0.7965  |
| -NA     | -1           | 1.0000  |
| +NA     | -0.73        | 0.9259  |

Positive values show pairs of means that are significantly different.

# Oneway Analysis of Lactic acid By Label

## Means Comparisons

### Comparisons with a control using Dunnett's Method

Control Group = -NA

|           | d       | Alpha    |
|-----------|---------|----------|
|           | 2.65691 | 0.05     |
| Abs(Dif)- |         |          |
| Level     | LSD     | p-Value  |
| -NA       | -1.46   | 1.0000   |
| 5nM-NA    | -1.09   | 0.9355   |
| 50nM-NA   | 1.344   | <.0001 * |
| 50nM+NA   | 1.5     | <.0001 * |
| 5nM+NA    | 1.797   | <.0001 * |
| +NA       | 2.192   | <.0001 * |

Positive values show pairs of means that are significantly different.

# Oneway Analysis of leucine By Label

## Means Comparisons

### Comparisons with a control using Dunnett's Method

Control Group = -NA

|           | d       | Alpha    |
|-----------|---------|----------|
|           | 2.65691 | 0.05     |
| Abs(Dif)- |         |          |
| Level     | LSD     | p-Value  |
| 5nM-NA    | 0.726   | <.0001 * |
| 50nM-NA   | 0.423   | 0.0004 * |
| 50nM+NA   | 0.423   | 0.0004 * |
| 5nM+NA    | 0.353   | 0.0009 * |
| -NA       | -0.59   | 1.0000   |
| +NA       | -0.28   | 0.5151   |

Positive values show pairs of means that are significantly different.

# Oneway Analysis of lysine By Label

## Means Comparisons

### Comparisons with a control using Dunnett's Method

Control Group = -NA

|           | d       | Alpha    |
|-----------|---------|----------|
|           | 2.65691 | 0.05     |
| Abs(Dif)- |         |          |
| Level     | LSD     | p-Value  |
| 5nM-NA    | 0.636   | <.0001 * |
| 5nM+NA    | 0.467   | 0.0006 * |
| 50nM-NA   | 0.413   | 0.0010 * |
| 50nM+NA   | 0.369   | 0.0016 * |
| -NA       | -0.71   | 1.0000   |
| +NA       | -0.42   | 0.7206   |

Positive values show pairs of means that are significantly different.

# Oneway Analysis of LysoPC(20:4) By Label

## Means Comparisons

### Comparisons with a control using Dunnett's Method

Control Group = -NA

|d|      Alpha  
2.65691      0.05

| Level   | Abs(Dif)-<br>LSD | p-Value  |
|---------|------------------|----------|
| -NA     | -1.46            | 1.0000   |
| 50nM-NA | 1.002            | 0.0005 * |
| 5nM-NA  | 1.227            | 0.0002 * |
| +NA     | 2.165            | <.0001 * |
| 50nM+NA | 2.354            | <.0001 * |
| 5nM+NA  | 3.625            | <.0001 * |

Positive values show pairs of means that are significantly different.

## Oneway Analysis of Maleic acid By Label

### Means Comparisons

#### Comparisons with a control using Dunnett's Method

Control Group = -NA

|           | d       | Alpha    |
|-----------|---------|----------|
|           | 2.65691 | 0.05     |
| Abs(Dif)- |         |          |
| Level     | LSD     | p-Value  |
| 5nM+NA    | 0.962   | <.0001 * |
| 5nM-NA    | 0.878   | <.0001 * |
| 50nM+NA   | 0.8     | <.0001 * |
| 50nM-NA   | 0.724   | <.0001 * |
| +NA       | -0.25   | 0.6558   |
| -NA       | -0.44   | 1.0000   |

Positive values show pairs of means that are significantly different.

# Oneway Analysis of Malic acid By Label

## Means Comparisons

### Comparisons with a control using Dunnett's Method

Control Group = -NA

|           | d       | Alpha    |
|-----------|---------|----------|
|           | 2.65691 | 0.05     |
| Abs(Dif)- |         |          |
| Level     | LSD     | p-Value  |
| 5nM+NA    | 5.955   | <.0001 * |
| 5nM-NA    | 2.762   | <.0001 * |
| +NA       | -0.89   | 0.2536   |
| -NA       | -2.9    | 1.0000   |
| 50nM+NA   | -0.93   | 0.2725   |
| 50nM-NA   | -0.69   | 0.1826   |

Positive values show pairs of means that are significantly different.

# Oneway Analysis of Mannose By Label

## Means Comparisons

### Comparisons with a control using Dunnett's Method

Control Group = -NA

|         |       |
|---------|-------|
| d       | Alpha |
| 2.65691 | 0.05  |

| Level   | Abs(Dif)-LSD | p-Value |
|---------|--------------|---------|
| 5nM+NA  | -0.36        | 0.7199  |
| +NA     | -0.37        | 0.7538  |
| 50nM-NA | -0.37        | 0.7618  |
| 50nM+NA | -0.41        | 0.8603  |
| 5nM-NA  | -0.5         | 0.9869  |
| -NA     | -0.61        | 1.0000  |

Positive values show pairs of means that are significantly different.

**Oneway Analysis of methionine By Label****Means Comparisons****Comparisons with a control using Dunnett's Method**

Control Group = -NA

|         |       |
|---------|-------|
| d       | Alpha |
| 2.65691 | 0.05  |

| Level   | Abs(Dif)-<br>LSD | p-Value  |
|---------|------------------|----------|
| 5nM-NA  | 0.469            | 0.0003 * |
| 50nM-NA | 0.287            | 0.0023 * |
| 5nM+NA  | 0.156            | 0.0101 * |
| 50nM+NA | 0.093            | 0.0196 * |
| -NA     | -0.62            | 1.0000   |
| +NA     | -0.11            | 0.1376   |

Positive values show pairs of means that are significantly different.

# Oneway Analysis of Methionine sulfoxide By Label

## Means Comparisons

### Comparisons with a control using Dunnett's Method

Control Group = -NA

|           | d       | Alpha    |
|-----------|---------|----------|
|           | 2.65691 | 0.05     |
| Abs(Dif)- |         |          |
| Level     | LSD     | p-Value  |
| 5nM-NA    | 0.17    | 0.0158 * |
| 5nM+NA    | 0.142   | 0.0192 * |
| 50nM+NA   | -0.28   | 0.2572   |
| 50nM-NA   | -0.61   | 0.8398   |
| +NA       | -0.85   | 0.9997   |
| -NA       | -0.92   | 1.0000   |

Positive values show pairs of means that are significantly different.

**Oneway Analysis of Methylcysteine By Label****Means Comparisons****Comparisons with a control using Dunnett's Method**

Control Group = -NA

|           | d       | Alpha    |
|-----------|---------|----------|
|           | 2.65691 | 0.05     |
| Abs(Dif)- |         |          |
| Level     | LSD     | p-Value  |
| 5nM-NA    | 0.118   | 0.0176 * |
| 5nM+NA    | -0.1    | 0.1156   |
| 50nM-NA   | -0.14   | 0.1476   |
| 50nM+NA   | -0.23   | 0.2745   |
| -NA       | -0.71   | 1.0000   |
| +NA       | -0.18   | 0.2043   |

Positive values show pairs of means that are significantly different.

**Oneway Analysis of Methylmalonic acid By Label****Means Comparisons****Comparisons with a control using Dunnett's Method**

Control Group = -NA

|         |       |
|---------|-------|
| d       | Alpha |
| 2.65691 | 0.05  |

| Level   | Abs(Dif)-<br>LSD | p-Value  |
|---------|------------------|----------|
| -NA     | -0.67            | 1.0000   |
| 5nM-NA  | 0.324            | 0.0021 * |
| 5nM+NA  | 0.586            | 0.0001 * |
| +NA     | 0.732            | <.0001 * |
| 50nM+NA | 0.79             | <.0001 * |
| 50nM-NA | 0.812            | <.0001 * |

Positive values show pairs of means that are significantly different.

# Oneway Analysis of myo-inositol By Label

## Means Comparisons

### Comparisons with a control using Dunnett's Method

Control Group = -NA

|         |       |
|---------|-------|
| d       | Alpha |
| 2.65691 | 0.05  |

| Level   | Abs(Dif)-LSD | p-Value |
|---------|--------------|---------|
| -NA     | -1.25        | 1.0000  |
| 50nM-NA | -0.92        | 0.9243  |
| 5nM+NA  | -0.85        | 0.8573  |
| 5nM-NA  | -0.83        | 0.8354  |
| +NA     | -0.65        | 0.5798  |
| 50nM+NA | -0.26        | 0.1586  |

Positive values show pairs of means that are significantly different.

**Oneway Analysis of N6-Acetyl-L-lysine By Label****Means Comparisons****Comparisons with a control using Dunnett's Method**

Control Group = -NA

|           | d       | Alpha    |
|-----------|---------|----------|
|           | 2.65691 | 0.05     |
| Abs(Dif)- |         |          |
| Level     | LSD     | p-Value  |
| 5nM-NA    | 0.605   | <.0001 * |
| 5nM+NA    | 0.516   | 0.0001 * |
| 50nM-NA   | 0.084   | 0.0202 * |
| 50nM+NA   | -0.1    | 0.1372   |
| -NA       | -0.58   | 1.0000   |
| +NA       | -0.23   | 0.3798   |

Positive values show pairs of means that are significantly different.

**Oneway Analysis of N-Acetylaspartylglutamic acid By Label****Means Comparisons****Comparisons with a control using Dunnett's Method**

Control Group = -NA

|           | d       | Alpha    |
|-----------|---------|----------|
|           | 2.65691 | 0.05     |
| Abs(Dif)- |         |          |
| Level     | LSD     | p-Value  |
| 50nM+NA   | -0.17   | 0.1728   |
| 5nM+NA    | -0.25   | 0.3016   |
| -NA       | -0.74   | 1.0000   |
| +NA       | -0.69   | 0.9998   |
| 5nM-NA    | -0.01   | 0.0545   |
| 50nM-NA   | 0.089   | 0.0237 * |

Positive values show pairs of means that are significantly different.

# Oneway Analysis of N-acetyl-glucosamine-1-phosphate By Label

## Means Comparisons

### Comparisons with a control using Dunnett's Method

Control Group = -NA

|           | d       | Alpha   |
|-----------|---------|---------|
|           | 2.65691 | 0.05    |
| Abs(Dif)- |         |         |
| Level     | LSD     | p-Value |
| 50nM+NA   | -0.56   | 0.3838  |
| 50nM-NA   | -0.72   | 0.5739  |
| 5nM-NA    | -1.07   | 0.9561  |
| -NA       | -1.4    | 1.0000  |
| +NA       | -1.23   | 0.9974  |
| 5nM+NA    | -1.14   | 0.9824  |

Positive values show pairs of means that are significantly different.

# Oneway Analysis of N-acetyl-glutamine By Label

## Means Comparisons

### Comparisons with a control using Dunnett's Method

Control Group = -NA

|           | d       | Alpha    |
|-----------|---------|----------|
|           | 2.65691 | 0.05     |
| Abs(Dif)- |         |          |
| Level     | LSD     | p-Value  |
| 5nM+NA    | 0.765   | <.0001 * |
| 5nM-NA    | 0.626   | <.0001 * |
| 50nM-NA   | 0.096   | 0.0159 * |
| 50nM+NA   | 0.001   | 0.0494 * |
| -NA       | -0.53   | 1.0000   |
| +NA       | -0.15   | 0.2211   |

Positive values show pairs of means that are significantly different.

**Oneway Analysis of N-Acetyl-L-alanine By Label****Means Comparisons****Comparisons with a control using Dunnett's Method**

Control Group = -NA

|           | d       | Alpha    |
|-----------|---------|----------|
|           | 2.65691 | 0.05     |
| Abs(Dif)- |         |          |
| Level     | LSD     | p-Value  |
| -NA       | -0.51   | 1.0000   |
| +NA       | 0.267   | 0.0016 * |
| 5nM+NA    | 1.629   | <.0001 * |
| 5nM-NA    | 1.641   | <.0001 * |
| 50nM-NA   | 2.47    | <.0001 * |
| 50nM+NA   | 2.602   | <.0001 * |

Positive values show pairs of means that are significantly different.

# Oneway Analysis of N-acetyl-L-ornithine By Label

## Means Comparisons

### Comparisons with a control using Dunnett's Method

Control Group = -NA

|           | d       | Alpha    |
|-----------|---------|----------|
|           | 2.65691 | 0.05     |
| Abs(Dif)- |         |          |
| Level     | LSD     | p-Value  |
| 5nM-NA    | 0.955   | <.0001 * |
| 50nM-NA   | 0.677   | <.0001 * |
| 5nM+NA    | 0.652   | <.0001 * |
| 50nM+NA   | 0.127   | 0.0146 * |
| -NA       | -0.65   | 1.0000   |
| +NA       | -0.07   | 0.0920   |

Positive values show pairs of means that are significantly different.

# Oneway Analysis of N-Acetylputrescine By Label

## Means Comparisons

### Comparisons with a control using Dunnett's Method

Control Group = -NA

|           | d       | Alpha    |
|-----------|---------|----------|
|           | 2.65691 | 0.05     |
| Abs(Dif)- |         |          |
| Level     | LSD     | p-Value  |
| -NA       | -0.22   | 1.0000   |
| +NA       | 0.194   | 0.0001 * |
| 5nM-NA    | 0.3     | <.0001 * |
| 50nM-NA   | 0.352   | <.0001 * |
| 5nM+NA    | 0.376   | <.0001 * |
| 50nM+NA   | 0.465   | <.0001 * |

Positive values show pairs of means that are significantly different.

# Oneway Analysis of NAD By Label

## Means Comparisons

### Comparisons with a control using Dunnett's Method

Control Group = -NA

|           | d       | Alpha    |
|-----------|---------|----------|
|           | 2.65691 | 0.05     |
| Abs(Dif)- |         |          |
| Level     | LSD     | p-Value  |
| +NA       | -1      | 1.0000   |
| -NA       | -1.01   | 1.0000   |
| 5nM-NA    | 5.529   | <.0001 * |
| 5nM+NA    | 5.534   | <.0001 * |
| 50nM-NA   | 5.541   | <.0001 * |
| 50nM+NA   | 5.542   | <.0001 * |

Positive values show pairs of means that are significantly different.

## Oneway Analysis of NADH By Label

### Means Comparisons

#### Comparisons with a control using Dunnett's Method

Control Group = -NA

|           | d       | Alpha    |
|-----------|---------|----------|
|           | 2.65691 | 0.05     |
| Abs(Dif)- |         |          |
| Level     | LSD     | p-Value  |
| +NA       | -0.65   | 0.9993   |
| -NA       | -0.71   | 1.0000   |
| 5nM-NA    | 3.342   | <.0001 * |
| 5nM+NA    | 3.357   | <.0001 * |
| 50nM-NA   | 3.446   | <.0001 * |
| 50nM+NA   | 3.463   | <.0001 * |

Positive values show pairs of means that are significantly different.

# Oneway Analysis of NADP By Label

## Means Comparisons

### Comparisons with a control using Dunnett's Method

Control Group = -NA

|           | d       | Alpha    |
|-----------|---------|----------|
|           | 2.65691 | 0.05     |
| Abs(Dif)- |         |          |
| Level     | LSD     | p-Value  |
| -NA       | -0.49   | 1.0000   |
| +NA       | 0.026   | 0.0365 * |
| 5nM+NA    | 2.2     | <.0001 * |
| 5nM-NA    | 2.28    | <.0001 * |
| 50nM-NA   | 2.741   | <.0001 * |
| 50nM+NA   | 2.826   | <.0001 * |

Positive values show pairs of means that are significantly different.

**Oneway Analysis of N-carbamoyl-L-aspartate By Label****Means Comparisons****Comparisons with a control using Dunnett's Method**

Control Group = -NA

|         |       |
|---------|-------|
| d       | Alpha |
| 2.65691 | 0.05  |

| Level   | Abs(Dif)-<br>LSD | p-Value  |
|---------|------------------|----------|
| -NA     | -0.75            | 1.0000   |
| +NA     | 0.775            | <.0001 * |
| 5nM-NA  | 2.213            | <.0001 * |
| 5nM+NA  | 3.011            | <.0001 * |
| 50nM-NA | 3.032            | <.0001 * |
| 50nM+NA | 3.312            | <.0001 * |

Positive values show pairs of means that are significantly different.

# Oneway Analysis of N-Formylglycinamide ribonucleotide By Label

## Means Comparisons

### Comparisons with a control using Dunnett's Method

Control Group = -NA

|           | d       | Alpha    |
|-----------|---------|----------|
|           | 2.65691 | 0.05     |
| Abs(Dif)- |         |          |
| Level     | LSD     | p-Value  |
| 50nM+NA   | 1.387   | <.0001 * |
| 50nM-NA   | 1.102   | <.0001 * |
| 5nM+NA    | 0.528   | <.0001 * |
| 5nM-NA    | 0.154   | 0.0029 * |
| +NA       | -0.33   | 0.9999   |
| -NA       | -0.35   | 1.0000   |

Positive values show pairs of means that are significantly different.

**Oneway Analysis of Ng,NG-dimethyl-L-arginine By Label****Means Comparisons****Comparisons with a control using Dunnett's Method**

Control Group = -NA

|         |       |
|---------|-------|
| d       | Alpha |
| 2.65691 | 0.05  |

| Level   | Abs(Dif)-<br>LSD | p-Value |
|---------|------------------|---------|
| 5nM-NA  | -0.1             | 0.0905  |
| 5nM+NA  | -0.21            | 0.1679  |
| 50nM-NA | -0.62            | 0.8288  |
| 50nM+NA | -0.75            | 0.9725  |
| -NA     | -0.94            | 1.0000  |
| +NA     | -0.83            | 0.9972  |

Positive values show pairs of means that are significantly different.

**Oneway Analysis of Nicotinamide By Label****Means Comparisons****Comparisons with a control using Dunnett's Method**

Control Group = -NA

|         |       |
|---------|-------|
| d       | Alpha |
| 2.65691 | 0.05  |

| Level   | Abs(Dif)-<br>LSD | p-Value |
|---------|------------------|---------|
| 5nM-NA  | -0.79            | 0.6915  |
| 5nM+NA  | -1.3             | 1.0000  |
| -NA     | -1.36            | 1.0000  |
| 50nM-NA | -1.24            | 0.9993  |
| +NA     | -0.79            | 0.7004  |
| 50nM+NA | -0.32            | 0.1779  |

Positive values show pairs of means that are significantly different.

**Oneway Analysis of Nicotinamide ribotide By Label****Means Comparisons****Comparisons with a control using Dunnett's Method**

Control Group = -NA

|         |       |
|---------|-------|
| d       | Alpha |
| 2.65691 | 0.05  |

| Level   | Abs(Dif)-<br>LSD | p-Value  |
|---------|------------------|----------|
| -NA     | -0.59            | 1.0000   |
| +NA     | -0.15            | 0.1990   |
| 5nM-NA  | 3.359            | <.0001 * |
| 50nM-NA | 3.359            | <.0001 * |
| 5nM+NA  | 3.359            | <.0001 * |
| 50nM+NA | 3.359            | <.0001 * |

Positive values show pairs of means that are significantly different.

# Oneway Analysis of Nicotinic acid By Label

## Means Comparisons

### Comparisons with a control using Dunnett's Method

Control Group = -NA

|           | d       | Alpha    |
|-----------|---------|----------|
|           | 2.65691 | 0.05     |
| Abs(Dif)- |         |          |
| Level     | LSD     | p-Value  |
| 5nM+NA    | 4.355   | <.0001 * |
| +NA       | 3.618   | <.0001 * |
| 50nM+NA   | 2.991   | <.0001 * |
| -NA       | -0.87   | 1.0000   |
| 5nM-NA    | -0.87   | 1.0000   |
| 50nM-NA   | -0.87   | 1.0000   |

Positive values show pairs of means that are significantly different.

# Oneway Analysis of Nicotyrine By Label

## Means Comparisons

### Comparisons with a control using Dunnett's Method

Control Group = -NA

|           | d       | Alpha    |
|-----------|---------|----------|
|           | 2.65691 | 0.05     |
| Abs(Dif)- |         |          |
| Level     | LSD     | p-Value  |
| 50nM+NA   | 0.036   | 0.0016 * |
| 50nM-NA   | -0.02   | 0.2920   |
| 5nM-NA    | -0.06   | 0.9946   |
| -NA       | -0.07   | 1.0000   |
| 5nM+NA    | -0.03   | 0.4708   |
| +NA       | -0.02   | 0.2033   |

Positive values show pairs of means that are significantly different.

# Oneway Analysis of O-acetyl-L-serine By Label

## Means Comparisons

### Comparisons with a control using Dunnett's Method

Control Group = -NA

|d|      Alpha  
2.65691      0.05

| Level   | Abs(Dif)-<br>LSD | p-Value  |
|---------|------------------|----------|
| -NA     | -0.52            | 1.0000   |
| +NA     | 0.034            | 0.0335 * |
| 5nM-NA  | 0.806            | <.0001 * |
| 5nM+NA  | 1.247            | <.0001 * |
| 50nM-NA | 1.279            | <.0001 * |
| 50nM+NA | 1.648            | <.0001 * |

Positive values show pairs of means that are significantly different.

# Oneway Analysis of octulose-phosphate By Label

## Means Comparisons

### Comparisons with a control using Dunnett's Method

Control Group = -NA

|           | d       | Alpha    |
|-----------|---------|----------|
|           | 2.65691 | 0.05     |
| Abs(Dif)- |         |          |
| Level     | LSD     | p-Value  |
| 50nM+NA   | 3.741   | <.0001 * |
| 50nM-NA   | 3.618   | <.0001 * |
| 5nM+NA    | 1.542   | <.0001 * |
| 5nM-NA    | 1.422   | <.0001 * |
| -NA       | -0.47   | 1.0000   |
| +NA       | -0.35   | 0.9434   |

Positive values show pairs of means that are significantly different.

**Oneway Analysis of ornithine By Label****Means Comparisons****Comparisons with a control using Dunnett's Method**

Control Group = -NA

|           | d       | Alpha    |
|-----------|---------|----------|
|           | 2.65691 | 0.05     |
| Abs(Dif)- |         |          |
| Level     | LSD     | p-Value  |
| 5nM-NA    | 0.664   | <.0001 * |
| 50nM-NA   | 0.446   | 0.0007 * |
| 5nM+NA    | 0.312   | 0.0028 * |
| 50nM+NA   | 0.285   | 0.0037 * |
| -NA       | -0.71   | 1.0000   |
| +NA       | -0.63   | 0.9977   |

Positive values show pairs of means that are significantly different.

# Oneway Analysis of orotate By Label

## Means Comparisons

### Comparisons with a control using Dunnett's Method

Control Group = -NA

|           | d       | Alpha    |
|-----------|---------|----------|
|           | 2.65691 | 0.05     |
| Abs(Dif)- |         |          |
| Level     | LSD     | p-Value  |
| 50nM-NA   | 0.14    | 0.0192 * |
| 5nM+NA    | -0.02   | 0.0553   |
| 5nM-NA    | -0.06   | 0.0756   |
| 50nM+NA   | -0.19   | 0.1636   |
| -NA       | -0.91   | 1.0000   |
| +NA       | -0.71   | 0.9698   |

Positive values show pairs of means that are significantly different.

# Oneway Analysis of Orotidine By Label

## Means Comparisons

### Comparisons with a control using Dunnett's Method

Control Group = -NA

|           | d       | Alpha    |
|-----------|---------|----------|
|           | 2.65691 | 0.05     |
| Abs(Dif)- |         |          |
| Level     | LSD     | p-Value  |
| 50nM+NA   | 3.675   | <.0001 * |
| 50nM-NA   | 2.557   | <.0001 * |
| 5nM+NA    | 2.474   | <.0001 * |
| 5nM-NA    | 2.024   | <.0001 * |
| -NA       | -0.35   | 1.0000   |
| +NA       | -0.34   | 1.0000   |

Positive values show pairs of means that are significantly different.

# Oneway Analysis of Palmitic acid By Label

## Means Comparisons

### Comparisons with a control using Dunnett's Method

Control Group = -NA

|           | d       | Alpha    |
|-----------|---------|----------|
|           | 2.65691 | 0.05     |
| Abs(Dif)- |         |          |
| Level     | LSD     | p-Value  |
| 50nM-NA   | 0.166   | <.0001 * |
| 5nM-NA    | -0.09   | 0.9999   |
| -NA       | -0.1    | 1.0000   |
| 5nM+NA    | -4e-3   | 0.0643   |
| 50nM+NA   | 0.003   | 0.0417 * |
| +NA       | 0.004   | 0.0389 * |

Positive values show pairs of means that are significantly different.

# Oneway Analysis of pantothenate By Label

## Means Comparisons

### Comparisons with a control using Dunnett's Method

Control Group = -NA

|           | d       | Alpha    |
|-----------|---------|----------|
|           | 2.65691 | 0.05     |
| Abs(Dif)- |         |          |
| Level     | LSD     | p-Value  |
| 50nM-NA   | -0.44   | 0.6731   |
| -NA       | -0.77   | 1.0000   |
| 5nM-NA    | -0.56   | 0.9247   |
| 50nM+NA   | -0.31   | 0.3748   |
| +NA       | 0.468   | 0.0008 * |
| 5nM+NA    | 0.485   | 0.0007 * |

Positive values show pairs of means that are significantly different.

# Oneway Analysis of PC (13:0) By Label

## Means Comparisons

### Comparisons with a control using Dunnett's Method

Control Group = -NA

|           | d       | Alpha    |
|-----------|---------|----------|
|           | 2.65691 | 0.05     |
| Abs(Dif)- |         |          |
| Level     | LSD     | p-Value  |
| 50nM+NA   | 0.318   | 0.0004 * |
| -NA       | -0.45   | 1.0000   |
| +NA       | -0.37   | 0.9885   |
| 50nM-NA   | -0.35   | 0.9704   |
| 5nM+NA    | -0.3    | 0.8644   |
| 5nM-NA    | -0.09   | 0.1491   |

Positive values show pairs of means that are significantly different.

**Oneway Analysis of PC (14:0) By Label****Means Comparisons****Comparisons with a control using Dunnett's Method**

Control Group = -NA

|           | d       | Alpha    |
|-----------|---------|----------|
|           | 2.65691 | 0.05     |
| Abs(Dif)- |         |          |
| Level     | LSD     | p-Value  |
| -NA       | -0.7    | 1.0000   |
| 50nM-NA   | 0.443   | 0.0007 * |
| 50nM+NA   | 0.514   | 0.0003 * |
| 5nM-NA    | 0.66    | <.0001 * |
| +NA       | 0.666   | <.0001 * |
| 5nM+NA    | 0.785   | <.0001 * |

Positive values show pairs of means that are significantly different.

**Oneway Analysis of PC (15:1) By Label****Means Comparisons****Comparisons with a control using Dunnett's Method**

Control Group = -NA

|           | d       | Alpha    |
|-----------|---------|----------|
|           | 2.65691 | 0.05     |
| Abs(Dif)- |         |          |
| Level     | LSD     | p-Value  |
| 50nM-NA   | -0.12   | 0.5329   |
| -NA       | -0.24   | 1.0000   |
| 5nM-NA    | -0.1    | 0.3684   |
| 50nM+NA   | 0.432   | <.0001 * |
| +NA       | 0.506   | <.0001 * |
| 5nM+NA    | 0.579   | <.0001 * |

Positive values show pairs of means that are significantly different.

# Oneway Analysis of PC(15:0) By Label

## Means Comparisons

### Comparisons with a control using Dunnett's Method

Control Group = -NA

|           | d       | Alpha    |
|-----------|---------|----------|
|           | 2.65691 | 0.05     |
| Abs(Dif)- |         |          |
| Level     | LSD     | p-Value  |
| 50nM+NA   | -0.27   | 0.1017   |
| -NA       | -2.14   | 1.0000   |
| 5nM+NA    | -0.02   | 0.0524   |
| 5nM-NA    | 1.672   | 0.0002 * |
| +NA       | 2.698   | <.0001 * |
| 50nM-NA   | 2.969   | <.0001 * |

Positive values show pairs of means that are significantly different.

# Oneway Analysis of PC(16:1) By Label

## Means Comparisons

### Comparisons with a control using Dunnett's Method

Control Group = -NA

|           | d       | Alpha    |
|-----------|---------|----------|
|           | 2.65691 | 0.05     |
| Abs(Dif)- |         |          |
| Level     | LSD     | p-Value  |
| 50nM+NA   | 0.59    | 0.0005 * |
| -NA       | -0.86   | 1.0000   |
| 5nM-NA    | 0.093   | 0.0258 * |
| 5nM+NA    | 0.153   | 0.0165 * |
| +NA       | 0.158   | 0.0159 * |
| 50nM-NA   | 0.18    | 0.0135 * |

Positive values show pairs of means that are significantly different.

# Oneway Analysis of PC(17:1) By Label

## Means Comparisons

### Comparisons with a control using Dunnett's Method

Control Group = -NA

|           | d       | Alpha    |
|-----------|---------|----------|
|           | 2.65691 | 0.05     |
| Abs(Dif)- |         |          |
| Level     | LSD     | p-Value  |
| -NA       | -0.44   | 1.0000   |
| 50nM-NA   | 0.267   | 0.0009 * |
| 5nM-NA    | 0.314   | 0.0004 * |
| 50nM+NA   | 0.526   | <.0001 * |
| 5nM+NA    | 0.976   | <.0001 * |
| +NA       | 1.212   | <.0001 * |

Positive values show pairs of means that are significantly different.

# Oneway Analysis of PC(17:2) By Label

## Means Comparisons

### Comparisons with a control using Dunnett's Method

Control Group = -NA

|           | d       | Alpha    |
|-----------|---------|----------|
|           | 2.65691 | 0.05     |
| Abs(Dif)- |         |          |
| Level     | LSD     | p-Value  |
| -NA       | -0.2    | 1.0000   |
| 50nM-NA   | -0.12   | 0.7661   |
| 5nM-NA    | 0.022   | 0.0258 * |
| +NA       | 0.196   | <.0001 * |
| 5nM+NA    | 0.266   | <.0001 * |
| 50nM+NA   | 0.354   | <.0001 * |

Positive values show pairs of means that are significantly different.

**Oneway Analysis of p-coumaric acid By Label****Means Comparisons****Comparisons with a control using Dunnett's Method**

Control Group = -NA

|         |       |
|---------|-------|
| d       | Alpha |
| 2.65691 | 0.05  |

| Level   | Abs(Dif)-LSD | p-Value |
|---------|--------------|---------|
| 50nM+NA | -6e-4        | 0.0508  |
| 5nM-NA  | -0.02        | 0.0903  |
| 5nM+NA  | -0.13        | 0.7339  |
| 50nM-NA | -0.15        | 0.8602  |
| -NA     | -0.22        | 1.0000  |
| +NA     | -0.15        | 0.8694  |

Positive values show pairs of means that are significantly different.

## Oneway Analysis of Pentadecanal By Label

### Means Comparisons

#### Comparisons with a control using Dunnett's Method

Control Group = -NA

|           | d       | Alpha    |
|-----------|---------|----------|
|           | 2.65691 | 0.05     |
| Abs(Dif)- |         |          |
| Level     | LSD     | p-Value  |
| 5nM-NA    | 0.705   | <.0001 * |
| 50nM-NA   | 0.569   | <.0001 * |
| 5nM+NA    | 0.483   | <.0001 * |
| 50nM+NA   | -0.18   | 0.2907   |
| -NA       | -0.52   | 1.0000   |
| +NA       | -0.52   | 1.0000   |

Positive values show pairs of means that are significantly different.

# Oneway Analysis of phenylalanine By Label

## Means Comparisons

### Comparisons with a control using Dunnett's Method

Control Group = -NA

|           | d       | Alpha    |
|-----------|---------|----------|
|           | 2.65691 | 0.05     |
| Abs(Dif)- |         |          |
| Level     | LSD     | p-Value  |
| 5nM-NA    | 0.344   | 0.0017 * |
| 5nM+NA    | 0.075   | 0.0254 * |
| 50nM-NA   | 0.039   | 0.0352 * |
| 50nM+NA   | -0.13   | 0.1466   |
| -NA       | -0.68   | 1.0000   |
| +NA       | -0.29   | 0.4279   |

Positive values show pairs of means that are significantly different.

# Oneway Analysis of Phenyllactic acid By Label

## Means Comparisons

### Comparisons with a control using Dunnett's Method

Control Group = -NA

|d|      Alpha  
2.65691      0.05

| Level   | Abs(Dif)-<br>LSD | p-Value |
|---------|------------------|---------|
| 5nM-NA  | -0.25            | 0.2381  |
| 5nM+NA  | -0.31            | 0.3155  |
| 50nM-NA | -0.7             | 0.9821  |
| 50nM+NA | -0.75            | 0.9963  |
| -NA     | -0.87            | 1.0000  |
| +NA     | -0.11            | 0.1044  |

Positive values show pairs of means that are significantly different.

# Oneway Analysis of Phosphate By Label

## Means Comparisons

### Comparisons with a control using Dunnett's Method

Control Group = -NA

|           | d       | Alpha    |
|-----------|---------|----------|
|           | 2.65691 | 0.05     |
| Abs(Dif)- |         |          |
| Level     | LSD     | p-Value  |
| 50nM+NA   | 0.588   | <.0001 * |
| 50nM-NA   | 0.433   | 0.0002 * |
| 5nM+NA    | 0.194   | 0.0046 * |
| +NA       | -0.03   | 0.0699   |
| 5nM-NA    | -0.37   | 0.8942   |
| -NA       | -0.53   | 1.0000   |

Positive values show pairs of means that are significantly different.

# Oneway Analysis of Phosphatidylglycerol By Label

## Means Comparisons

### Comparisons with a control using Dunnett's Method

Control Group = -NA

|           | d       | Alpha    |
|-----------|---------|----------|
|           | 2.65691 | 0.05     |
| Abs(Dif)- |         |          |
| Level     | LSD     | p-Value  |
| 5nM+NA    | 2.88    | <.0001 * |
| +NA       | 2.389   | <.0001 * |
| 50nM+NA   | -0.24   | 0.0864   |
| 5nM-NA    | -0.5    | 0.1464   |
| -NA       | -2.57   | 1.0000   |
| 50nM-NA   | -1.68   | 0.8249   |

Positive values show pairs of means that are significantly different.

**Oneway Analysis of phosphoenolpyruvate By Label****Means Comparisons****Comparisons with a control using Dunnett's Method**

Control Group = -NA

|         |       |
|---------|-------|
| d       | Alpha |
| 2.65691 | 0.05  |

| Level   | Abs(Dif)-<br>LSD | p-Value |
|---------|------------------|---------|
| -NA     | -0.93            | 1.0000  |
| 5nM-NA  | -0.88            | 1.0000  |
| 5nM+NA  | -0.82            | 0.9978  |
| 50nM-NA | -0.58            | 0.7671  |
| +NA     | -0.3             | 0.2710  |
| 50nM+NA | -0.24            | 0.2036  |

Positive values show pairs of means that are significantly different.

# Oneway Analysis of Phosphorylcholine By Label

## Means Comparisons

### Comparisons with a control using Dunnett's Method

Control Group = -NA

|           | d       | Alpha    |
|-----------|---------|----------|
|           | 2.65691 | 0.05     |
| Abs(Dif)- |         |          |
| Level     | LSD     | p-Value  |
| 5nM-NA    | -0.54   | 0.8961   |
| -NA       | -0.77   | 1.0000   |
| 50nM-NA   | -0.65   | 0.9915   |
| 5nM+NA    | -0.42   | 0.6332   |
| 50nM+NA   | -0.34   | 0.4473   |
| +NA       | 0.234   | 0.0071 * |

Positive values show pairs of means that are significantly different.

**Oneway Analysis of p-hydroxybenzoate By Label****Means Comparisons****Comparisons with a control using Dunnett's Method**

Control Group = -NA

|           | d       | Alpha    |
|-----------|---------|----------|
|           | 2.65691 | 0.05     |
| Abs(Dif)- |         |          |
| Level     | LSD     | p-Value  |
| 5nM-NA    | 0.542   | 0.0002 * |
| 5nM+NA    | 0.425   | 0.0008 * |
| 50nM-NA   | 0.232   | 0.0057 * |
| 50nM+NA   | 0.074   | 0.0258 * |
| -NA       | -0.69   | 1.0000   |
| +NA       | -0.4    | 0.6948   |

Positive values show pairs of means that are significantly different.

# Oneway Analysis of PI(16:0/20:2) By Label

## Means Comparisons

### Comparisons with a control using Dunnett's Method

Control Group = -NA

|           | d       | Alpha    |
|-----------|---------|----------|
|           | 2.65691 | 0.05     |
| Abs(Dif)- |         |          |
| Level     | LSD     | p-Value  |
| 50nM-NA   | 2.165   | <.0001 * |
| 5nM-NA    | -0.36   | 0.1718   |
| 50nM+NA   | -1.56   | 1.0000   |
| -NA       | -1.62   | 1.0000   |
| +NA       | 0.64    | 0.0038 * |
| 5nM+NA    | 1.111   | 0.0005 * |

Positive values show pairs of means that are significantly different.

# Oneway Analysis of PI(16:0/22:4) By Label

## Means Comparisons

### Comparisons with a control using Dunnett's Method

Control Group = -NA

|           | d       | Alpha    |
|-----------|---------|----------|
|           | 2.65691 | 0.05     |
| Abs(Dif)- |         |          |
| Level     | LSD     | p-Value  |
| 50nM-NA   | 5.501   | <.0001 * |
| 50nM+NA   | 0.383   | 0.0248 * |
| 5nM-NA    | -0.3    | 0.0833   |
| -NA       | -3.36   | 1.0000   |
| 5nM+NA    | -0.46   | 0.1087   |
| +NA       | -0.15   | 0.0650   |

Positive values show pairs of means that are significantly different.

# Oneway Analysis of PI(16:1/22:4) By Label

## Means Comparisons

### Comparisons with a control using Dunnett's Method

Control Group = -NA

|           | d       | Alpha    |
|-----------|---------|----------|
|           | 2.65691 | 0.05     |
| Abs(Dif)- |         |          |
| Level     | LSD     | p-Value  |
| 50nM-NA   | 5.697   | <.0001 * |
| 50nM+NA   | 1.501   | 0.0007 * |
| 5nM-NA    | 1.202   | 0.0017 * |
| -NA       | -2.36   | 1.0000   |
| 5nM+NA    | -0.37   | 0.1204   |
| +NA       | 0.232   | 0.0274 * |

Positive values show pairs of means that are significantly different.

**Oneway Analysis of Piperidine By Label****Means Comparisons****Comparisons with a control using Dunnett's Method**

Control Group = -NA

|         |       |
|---------|-------|
| d       | Alpha |
| 2.65691 | 0.05  |

| Level   | Abs(Dif)-<br>LSD | p-Value  |
|---------|------------------|----------|
| 50nM+NA | 0.031            | 0.0208 * |
| 50nM-NA | -0.07            | 0.2672   |
| 5nM-NA  | -0.15            | 0.8931   |
| 5nM+NA  | -0.21            | 1.0000   |
| -NA     | -0.22            | 1.0000   |
| +NA     | -0.21            | 0.9999   |

Positive values show pairs of means that are significantly different.

# Oneway Analysis of proline By Label

## Means Comparisons

### Comparisons with a control using Dunnett's Method

Control Group = -NA

|         |       |
|---------|-------|
| d       | Alpha |
| 2.65691 | 0.05  |

| Level   | Abs(Dif)-<br>LSD | p-Value  |
|---------|------------------|----------|
| 5nM-NA  | 1.881            | <.0001 * |
| 5nM+NA  | 1.096            | <.0001 * |
| 50nM+NA | 0.741            | <.0001 * |
| 50nM-NA | 0.736            | <.0001 * |
| -NA     | -0.66            | 1.0000   |
| +NA     | -0.66            | 1.0000   |

Positive values show pairs of means that are significantly different.

# Oneway Analysis of purine By Label

## Means Comparisons

### Comparisons with a control using Dunnett's Method

Control Group = -NA

|           | d       | Alpha    |
|-----------|---------|----------|
|           | 2.65691 | 0.05     |
| Abs(Dif)- |         |          |
| Level     | LSD     | p-Value  |
| 5nM-NA    | 0.361   | 0.0014 * |
| 5nM+NA    | 0.01    | 0.0457 * |
| 50nM-NA   | -0.06   | 0.0845   |
| 50nM+NA   | -0.37   | 0.6434   |
| -NA       | -0.68   | 1.0000   |
| +NA       | -0.23   | 0.2857   |

Positive values show pairs of means that are significantly different.

**Oneway Analysis of pyridoxine By Label****Means Comparisons****Comparisons with a control using Dunnett's Method**

Control Group = -NA

|         |       |
|---------|-------|
| d       | Alpha |
| 2.65691 | 0.05  |

| Level   | Abs(Dif)-LSD | p-Value |
|---------|--------------|---------|
| 5nM-NA  | -0.87        | 0.9976  |
| -NA     | -0.99        | 1.0000  |
| 5nM+NA  | -0.81        | 0.9842  |
| 50nM-NA | -0.41        | 0.4108  |
| +NA     | -0.31        | 0.2577  |
| 50nM+NA | -0.25        | 0.2026  |

Positive values show pairs of means that are significantly different.

**Oneway Analysis of Pyroglutamate By Label****Means Comparisons****Comparisons with a control using Dunnett's Method**

Control Group = -NA

|         |       |
|---------|-------|
| d       | Alpha |
| 2.65691 | 0.05  |

| Level   | Abs(Dif)-<br>LSD | p-Value |
|---------|------------------|---------|
| +NA     | -4.3             | 0.3052  |
| 50nM+NA | -12.4            | 1.0000  |
| 50nM-NA | -12.4            | 1.0000  |
| 5nM-NA  | -12.4            | 1.0000  |
| 5nM+NA  | -12.4            | 1.0000  |
| -NA     | -12.4            | 1.0000  |

Positive values show pairs of means that are significantly different.

**Oneway Analysis of pyruvate By Label****Means Comparisons****Comparisons with a control using Dunnett's Method**

Control Group = -NA

|           | d       | Alpha    |
|-----------|---------|----------|
|           | 2.65691 | 0.05     |
| Abs(Dif)- |         |          |
| Level     | LSD     | p-Value  |
| -NA       | -1.06   | 1.0000   |
| +NA       | -0.59   | 0.6622   |
| 5nM+NA    | -0.39   | 0.3302   |
| 5nM-NA    | -0.15   | 0.1102   |
| 50nM-NA   | 0.705   | 0.0005 * |
| 50nM+NA   | 0.712   | 0.0005 * |

Positive values show pairs of means that are significantly different.

**Oneway Analysis of riboflavin By Label****Means Comparisons****Comparisons with a control using Dunnett's Method**

Control Group = -NA

|           | d       | Alpha   |
|-----------|---------|---------|
|           | 2.65691 | 0.05    |
| Abs(Dif)- |         |         |
| Level     | LSD     | p-Value |
| 5nM-NA    | -0.94   | 0.9999  |
| -NA       | -1      | 1.0000  |
| 5nM+NA    | -0.73   | 0.9237  |
| 50nM-NA   | -0.36   | 0.3305  |
| +NA       | -0.32   | 0.2732  |
| 50nM+NA   | -0.3    | 0.2511  |

Positive values show pairs of means that are significantly different.

# Oneway Analysis of ribose-5-phosphate By Label

## Means Comparisons

### Comparisons with a control using Dunnett's Method

Control Group = -NA

|           | d       | Alpha    |
|-----------|---------|----------|
|           | 2.65691 | 0.05     |
| Abs(Dif)- |         |          |
| Level     | LSD     | p-Value  |
| 50nM+NA   | 2.526   | <.0001 * |
| 50nM-NA   | 1.191   | <.0001 * |
| 5nM+NA    | 0.61    | 0.0009 * |
| 5nM-NA    | 0.216   | 0.0134 * |
| -NA       | -1.03   | 1.0000   |
| +NA       | -0.94   | 0.9994   |

Positive values show pairs of means that are significantly different.

**Oneway Analysis of S-adenosyl-L-homoCysteine By Label****Means Comparisons****Comparisons with a control using Dunnett's Method**

Control Group = -NA

|         |       |
|---------|-------|
| d       | Alpha |
| 2.65691 | 0.05  |

| Level   | Abs(Dif)-<br>LSD | p-Value  |
|---------|------------------|----------|
| 5nM-NA  | -0.28            | 0.4747   |
| 50nM+NA | -0.31            | 0.5325   |
| 50nM-NA | -0.31            | 0.5604   |
| -NA     | -0.62            | 1.0000   |
| 5nM+NA  | -0.43            | 0.8698   |
| +NA     | 0.498            | 0.0002 * |

Positive values show pairs of means that are significantly different.

# Oneway Analysis of S-adenosyl-L-methioninamine By Label

## Means Comparisons

### Comparisons with a control using Dunnett's Method

Control Group = -NA

|           | d       | Alpha    |
|-----------|---------|----------|
|           | 2.65691 | 0.05     |
| Abs(Dif)- |         |          |
| Level     | LSD     | p-Value  |
| -NA       | -1.23   | 1.0000   |
| +NA       | -0.36   | 0.2417   |
| 5nM-NA    | -0.33   | 0.2136   |
| 50nM-NA   | -0.23   | 0.1432   |
| 5nM+NA    | 0.669   | 0.0013 * |
| 50nM+NA   | 0.8     | 0.0006 * |

Positive values show pairs of means that are significantly different.

**Oneway Analysis of S-adenosyl-L-methionine By Label****Means Comparisons****Comparisons with a control using Dunnett's Method**

Control Group = -NA

|           | d       | Alpha    |
|-----------|---------|----------|
|           | 2.65691 | 0.05     |
| Abs(Dif)- |         |          |
| Level     | LSD     | p-Value  |
| 50nM-NA   | 2.672   | <.0001 * |
| 50nM+NA   | 2.46    | <.0001 * |
| 5nM-NA    | 1.703   | <.0001 * |
| 5nM+NA    | 1.453   | <.0001 * |
| -NA       | -0.47   | 1.0000   |
| +NA       | -0.39   | 0.9874   |

Positive values show pairs of means that are significantly different.

# Oneway Analysis of sarcosine By Label

## Means Comparisons

### Comparisons with a control using Dunnett's Method

Control Group = -NA

|           | d       | Alpha    |
|-----------|---------|----------|
|           | 2.65691 | 0.05     |
| Abs(Dif)- |         |          |
| Level     | LSD     | p-Value  |
| 50nM+NA   | 1.617   | <.0001 * |
| 50nM-NA   | 1.427   | <.0001 * |
| 5nM+NA    | 0.798   | <.0001 * |
| 5nM-NA    | 0.433   | <.0001 * |
| +NA       | -0.07   | 0.1462   |
| -NA       | -0.36   | 1.0000   |

Positive values show pairs of means that are significantly different.

# Oneway Analysis of Sedoheptulose 7-phosphate By Label

## Means Comparisons

### Comparisons with a control using Dunnett's Method

Control Group = -NA

|           | d       | Alpha    |
|-----------|---------|----------|
|           | 2.65691 | 0.05     |
| Abs(Dif)- |         |          |
| Level     | LSD     | p-Value  |
| 50nM+NA   | 3.216   | <.0001 * |
| 50nM-NA   | 1.799   | <.0001 * |
| 5nM+NA    | 1.111   | <.0001 * |
| 5nM-NA    | 0.567   | <.0001 * |
| +NA       | -0.34   | 1.0000   |
| -NA       | -0.36   | 1.0000   |

Positive values show pairs of means that are significantly different.

**Oneway Analysis of serine By Label****Means Comparisons****Comparisons with a control using Dunnett's Method**

Control Group = -NA

|         |       |
|---------|-------|
| d       | Alpha |
| 2.65691 | 0.05  |

| Level   | Abs(Dif)-<br>LSD | p-Value |
|---------|------------------|---------|
| 50nM+NA | -0.63            | 0.5867  |
| 50nM-NA | -0.9             | 0.9362  |
| +NA     | -1.08            | 0.9986  |
| -NA     | -1.21            | 1.0000  |
| 5nM+NA  | -0.93            | 0.9548  |
| 5nM-NA  | -0.91            | 0.9393  |

Positive values show pairs of means that are significantly different.

**Oneway Analysis of S-methyl-5-thioadenosine By Label****Means Comparisons****Comparisons with a control using Dunnett's Method**

Control Group = -NA

|         |       |
|---------|-------|
| d       | Alpha |
| 2.65691 | 0.05  |

| Level   | Abs(Dif)-<br>LSD | p-Value  |
|---------|------------------|----------|
| -NA     | -0.92            | 1.0000   |
| +NA     | 1.04             | <.0001 * |
| 5nM-NA  | 2.944            | <.0001 * |
| 50nM-NA | 4.748            | <.0001 * |
| 5nM+NA  | 4.993            | <.0001 * |
| 50nM+NA | 5.329            | <.0001 * |

Positive values show pairs of means that are significantly different.

# Oneway Analysis of sn-glycerol-3-phosphate By Label

## Means Comparisons

### Comparisons with a control using Dunnett's Method

Control Group = -NA

|           | d       | Alpha    |
|-----------|---------|----------|
|           | 2.65691 | 0.05     |
| Abs(Dif)- |         |          |
| Level     | LSD     | p-Value  |
| 50nM-NA   | 1.417   | <.0001 * |
| 50nM+NA   | 1.277   | <.0001 * |
| 5nM+NA    | -0.15   | 0.0988   |
| 5nM-NA    | -0.59   | 0.5130   |
| -NA       | -1.24   | 1.0000   |
| +NA       | -1.05   | 0.9928   |

Positive values show pairs of means that are significantly different.

# Oneway Analysis of Spermidine By Label

## Means Comparisons

### Comparisons with a control using Dunnett's Method

Control Group = -NA

|           | d       | Alpha    |
|-----------|---------|----------|
|           | 2.65691 | 0.05     |
| Abs(Dif)- |         |          |
| Level     | LSD     | p-Value  |
| 50nM-NA   | 2.562   | <.0001 * |
| 50nM+NA   | 1.703   | <.0001 * |
| 5nM-NA    | 0.63    | <.0001 * |
| 5nM+NA    | 0.269   | 0.0007 * |
| -NA       | -0.43   | 1.0000   |
| +NA       | -0.35   | 0.9832   |

Positive values show pairs of means that are significantly different.

**Oneway Analysis of Spermine By Label****Means Comparisons****Comparisons with a control using Dunnett's Method**

Control Group = -NA

|         |       |
|---------|-------|
| d       | Alpha |
| 2.65691 | 0.05  |

| Level   | Abs(Dif)-<br>LSD | p-Value  |
|---------|------------------|----------|
| 50nM-NA | 0.094            | 0.0002 * |
| 50nM+NA | 0.005            | 0.0388 * |
| 5nM+NA  | -0.04            | 0.3065   |
| +NA     | -0.05            | 0.4470   |
| 5nM-NA  | -0.05            | 0.5003   |
| -NA     | -0.11            | 1.0000   |

Positive values show pairs of means that are significantly different.

# Oneway Analysis of Stearic acid By Label

## Means Comparisons

### Comparisons with a control using Dunnett's Method

Control Group = -NA

|           | d       | Alpha    |
|-----------|---------|----------|
|           | 2.65691 | 0.05     |
| Abs(Dif)- |         |          |
| Level     | LSD     | p-Value  |
| 50nM-NA   | 0.043   | 0.0068 * |
| 5nM-NA    | -0.05   | 0.3331   |
| -NA       | -0.14   | 1.0000   |
| 5nM+NA    | -0.06   | 0.4650   |
| +NA       | -0.05   | 0.3441   |
| 50nM+NA   | 0.007   | 0.0369 * |

Positive values show pairs of means that are significantly different.

**Oneway Analysis of succinate By Label****Means Comparisons****Comparisons with a control using Dunnett's Method**

Control Group = -NA

|         |       |
|---------|-------|
| d       | Alpha |
| 2.65691 | 0.05  |

| Level   | Abs(Dif)-<br>LSD | p-Value |
|---------|------------------|---------|
| 5nM-NA  | -0.58            | 0.4148  |
| 50nM+NA | -0.61            | 0.4492  |
| 5nM+NA  | -0.83            | 0.7494  |
| 50nM-NA | -0.95            | 0.8782  |
| -NA     | -1.37            | 1.0000  |
| +NA     | -1.17            | 0.9948  |

Positive values show pairs of means that are significantly different.

# Oneway Analysis of succinyl-CoA By Label

## Means Comparisons

### Comparisons with a control using Dunnett's Method

Control Group = -NA

|         |       |
|---------|-------|
| d       | Alpha |
| 2.65691 | 0.05  |

| Level   | Abs(Dif)-<br>LSD | p-Value  |
|---------|------------------|----------|
| 5nM+NA  | -0.81            | 0.8498   |
| +NA     | -1.04            | 0.9951   |
| -NA     | -1.21            | 1.0000   |
| 5nM-NA  | -0.55            | 0.4651   |
| 50nM-NA | -0.32            | 0.2087   |
| 50nM+NA | 0.188            | 0.0190 * |

Positive values show pairs of means that are significantly different.

**Oneway Analysis of taurine By Label****Means Comparisons****Comparisons with a control using Dunnett's Method**

Control Group = -NA

|         |       |
|---------|-------|
| d       | Alpha |
| 2.65691 | 0.05  |

| Level   | Abs(Dif)-<br>LSD | p-Value  |
|---------|------------------|----------|
| -NA     | -0.73            | 1.0000   |
| 50nM-NA | 0.027            | 0.0402 * |
| +NA     | 0.113            | 0.0193 * |
| 5nM-NA  | 0.314            | 0.0030 * |
| 5nM+NA  | 0.498            | 0.0005 * |
| 50nM+NA | 0.572            | 0.0002 * |

Positive values show pairs of means that are significantly different.

**Oneway Analysis of Taurodeoxycholic acid By Label****Means Comparisons****Comparisons with a control using Dunnett's Method**

Control Group = -NA

|         |       |
|---------|-------|
| d       | Alpha |
| 2.65691 | 0.05  |

| Level   | Abs(Dif)-<br>LSD | p-Value |
|---------|------------------|---------|
| 5nM-NA  | -1.35            | 0.9999  |
| -NA     | -1.44            | 1.0000  |
| 5nM+NA  | -1.08            | 0.9424  |
| 50nM-NA | -1.02            | 0.8968  |
| 50nM+NA | -0.73            | 0.5642  |
| +NA     | -0.58            | 0.3843  |

Positive values show pairs of means that are significantly different.

**Oneway Analysis of thiamine By Label****Means Comparisons****Comparisons with a control using Dunnett's Method**

Control Group = -NA

|         |       |
|---------|-------|
| d       | Alpha |
| 2.65691 | 0.05  |

| Level   | Abs(Dif)-<br>LSD | p-Value |
|---------|------------------|---------|
| 5nM-NA  | -0.61            | 0.8450  |
| -NA     | -0.92            | 1.0000  |
| 5nM+NA  | -0.86            | 0.9999  |
| 50nM-NA | -0.66            | 0.9083  |
| 50nM+NA | -0.49            | 0.6042  |
| +NA     | -0.27            | 0.2397  |

Positive values show pairs of means that are significantly different.

# Oneway Analysis of Thiamine pyrophosphate By Label

## Means Comparisons

### Comparisons with a control using Dunnett's Method

Control Group = -NA

|           | d       | Alpha    |
|-----------|---------|----------|
|           | 2.65691 | 0.05     |
| Abs(Dif)- |         |          |
| Level     | LSD     | p-Value  |
| -NA       | -1.07   | 1.0000   |
| +NA       | -8e-5   | 0.0500   |
| 5nM-NA    | 0.004   | 0.0489 * |
| 50nM-NA   | 0.091   | 0.0299 * |
| 5nM+NA    | 0.208   | 0.0148 * |
| 50nM+NA   | 1.053   | <.0001 * |

Positive values show pairs of means that are significantly different.

**Oneway Analysis of threonine By Label****Means Comparisons****Comparisons with a control using Dunnett's Method**

Control Group = -NA

|         |       |
|---------|-------|
| d       | Alpha |
| 2.65691 | 0.05  |

| Level   | Abs(Dif)-<br>LSD | p-Value  |
|---------|------------------|----------|
| 5nM-NA  | 0.492            | 0.0001 * |
| 50nM-NA | 0.423            | 0.0003 * |
| 50nM+NA | 0.223            | 0.0039 * |
| 5nM+NA  | 0.183            | 0.0064 * |
| -NA     | -0.57            | 1.0000   |
| +NA     | -0.06            | 0.0873   |

Positive values show pairs of means that are significantly different.

# Oneway Analysis of thymidine By Label

## Means Comparisons

### Comparisons with a control using Dunnett's Method

Control Group = -NA

|           | d       | Alpha    |
|-----------|---------|----------|
|           | 2.65691 | 0.05     |
| Abs(Dif)- |         |          |
| Level     | LSD     | p-Value  |
| 50nM+NA   | 2.088   | <.0001 * |
| 50nM-NA   | 1.765   | <.0001 * |
| 5nM+NA    | 0.565   | 0.0004 * |
| 5nM-NA    | 0.307   | 0.0043 * |
| -NA       | -0.81   | 1.0000   |
| +NA       | -0.79   | 1.0000   |

Positive values show pairs of means that are significantly different.

**Oneway Analysis of tryptophan By Label****Means Comparisons****Comparisons with a control using Dunnett's Method**

Control Group = -NA

|           | d       | Alpha    |
|-----------|---------|----------|
|           | 2.65691 | 0.05     |
| Abs(Dif)- |         |          |
| Level     | LSD     | p-Value  |
| 5nM-NA    | 0.367   | 0.0011 * |
| 5nM+NA    | 0.205   | 0.0064 * |
| 50nM+NA   | 0.042   | 0.0334 * |
| 50nM-NA   | 0.027   | 0.0388 * |
| -NA       | -0.64   | 1.0000   |
| +NA       | -0.22   | 0.2928   |

Positive values show pairs of means that are significantly different.

**Oneway Analysis of tyrosine By Label****Means Comparisons****Comparisons with a control using Dunnett's Method**

Control Group = -NA

|           | d       | Alpha    |
|-----------|---------|----------|
|           | 2.65691 | 0.05     |
| Abs(Dif)- |         |          |
| Level     | LSD     | p-Value  |
| 5nM-NA    | 0.293   | 0.0029 * |
| 5nM+NA    | 0.159   | 0.0114 * |
| 50nM-NA   | 0.028   | 0.0392 * |
| 50nM+NA   | -0.02   | 0.0604   |
| -NA       | -0.68   | 1.0000   |
| +NA       | -0.32   | 0.5084   |

Positive values show pairs of means that are significantly different.

**Oneway Analysis of UDP By Label****Means Comparisons****Comparisons with a control using Dunnett's Method**

Control Group = -NA

|         |       |
|---------|-------|
| d       | Alpha |
| 2.65691 | 0.05  |

| Level   | Abs(Dif)-<br>LSD | p-Value  |
|---------|------------------|----------|
| 5nM-NA  | 0.135            | 0.0213 * |
| 5nM+NA  | -0.05            | 0.0668   |
| 50nM-NA | -0.22            | 0.1717   |
| 50nM+NA | -0.86            | 0.9976   |
| -NA     | -0.98            | 1.0000   |
| +NA     | -0.11            | 0.0979   |

Positive values show pairs of means that are significantly different.

# Oneway Analysis of UDP-D-glucose By Label

## Means Comparisons

### Comparisons with a control using Dunnett's Method

Control Group = -NA

|           | d       | Alpha    |
|-----------|---------|----------|
|           | 2.65691 | 0.05     |
| Abs(Dif)- |         |          |
| Level     | LSD     | p-Value  |
| 5nM+NA    | 0.349   | 0.0014 * |
| 5nM-NA    | 0.018   | 0.0422 * |
| +NA       | -0.42   | 0.8119   |
| -NA       | -0.65   | 1.0000   |
| 50nM+NA   | 0.745   | <.0001 * |
| 50nM-NA   | 0.804   | <.0001 * |

Positive values show pairs of means that are significantly different.

**Oneway Analysis of UDP-D-glucuronate By Label****Means Comparisons****Comparisons with a control using Dunnett's Method**

Control Group = -NA

|           | d       | Alpha    |
|-----------|---------|----------|
|           | 2.65691 | 0.05     |
| Abs(Dif)- |         |          |
| Level     | LSD     | p-Value  |
| -NA       | -0.64   | 1.0000   |
| +NA       | -0.26   | 0.3805   |
| 5nM+NA    | 1.861   | <.0001 * |
| 5nM-NA    | 1.881   | <.0001 * |
| 50nM-NA   | 2.478   | <.0001 * |
| 50nM+NA   | 2.701   | <.0001 * |

Positive values show pairs of means that are significantly different.

# Oneway Analysis of UDP-N-acetyl-glucosamine By Label

## Means Comparisons

### Comparisons with a control using Dunnett's Method

Control Group = -NA

|           | d       | Alpha    |
|-----------|---------|----------|
|           | 2.65691 | 0.05     |
| Abs(Dif)- |         |          |
| Level     | LSD     | p-Value  |
| 5nM+NA    | -0.53   | 0.7429   |
| 5nM-NA    | -0.65   | 0.9456   |
| -NA       | -0.87   | 1.0000   |
| +NA       | -0.2    | 0.1798   |
| 50nM-NA   | 0.006   | 0.0480 * |
| 50nM+NA   | 0.4     | 0.0024 * |

Positive values show pairs of means that are significantly different.

## Oneway Analysis of Urea By Label

### Means Comparisons

#### Comparisons with a control using Dunnett's Method

Control Group = -NA

|           | d       | Alpha    |
|-----------|---------|----------|
|           | 2.65691 | 0.05     |
| Abs(Dif)- |         |          |
| Level     | LSD     | p-Value  |
| +NA       | 0.014   | 0.0239 * |
| 5nM+NA    | 5e-4    | 0.0487 * |
| -NA       | -0.12   | 1.0000   |
| 5nM-NA    | 0.064   | 0.0013 * |
| 50nM-NA   | 0.064   | 0.0012 * |
| 50nM+NA   | 0.064   | 0.0012 * |

Positive values show pairs of means that are significantly different.

**Oneway Analysis of Uric acid By Label****Means Comparisons****Comparisons with a control using Dunnett's Method**

Control Group = -NA

|           | d       | Alpha   |
|-----------|---------|---------|
|           | 2.65691 | 0.05    |
| Abs(Dif)- |         |         |
| Level     | LSD     | p-Value |
| 5nM-NA    | -0.86   | 0.9935  |
| -NA       | -1.01   | 1.0000  |
| 5nM+NA    | -0.8    | 0.9705  |
| 50nM+NA   | -0.62   | 0.7533  |
| 50nM-NA   | -0.57   | 0.6585  |
| +NA       | -0.49   | 0.5204  |

Positive values show pairs of means that are significantly different.

# Oneway Analysis of uridine By Label

## Means Comparisons

### Comparisons with a control using Dunnett's Method

Control Group = -NA

|         |       |
|---------|-------|
| d       | Alpha |
| 2.65691 | 0.05  |

| Level   | Abs(Dif)-<br>LSD | p-Value  |
|---------|------------------|----------|
| 50nM+NA | 1.472            | <.0001 * |
| 50nM-NA | 1.164            | 0.0001 * |
| 5nM+NA  | 0.453            | 0.0055 * |
| 5nM-NA  | -0.13            | 0.0886   |
| +NA     | -1.3             | 1.0000   |
| -NA     | -1.32            | 1.0000   |

Positive values show pairs of means that are significantly different.

# Oneway Analysis of UTP By Label

## Means Comparisons

### Comparisons with a control using Dunnett's Method

Control Group = -NA

|           | d       | Alpha    |
|-----------|---------|----------|
|           | 2.65691 | 0.05     |
| Abs(Dif)- |         |          |
| Level     | LSD     | p-Value  |
| 5nM-NA    | -0.01   | 0.0528   |
| -NA       | -1.46   | 1.0000   |
| 50nM-NA   | -1.06   | 0.9213   |
| +NA       | -0.06   | 0.0629   |
| 5nM+NA    | 0.255   | 0.0168 * |
| 50nM+NA   | 1.08    | 0.0003 * |

Positive values show pairs of means that are significantly different.

# Oneway Analysis of Valine By Label

## Means Comparisons

### Comparisons with a control using Dunnett's Method

Control Group = -NA

|           | d       | Alpha    |
|-----------|---------|----------|
|           | 2.65691 | 0.05     |
| Abs(Dif)- |         |          |
| Level     | LSD     | p-Value  |
| 50nM-NA   | 0.528   | <.0001 * |
| 50nM+NA   | 0.362   | <.0001 * |
| 5nM-NA    | 0.262   | <.0001 * |
| 5nM+NA    | 0.128   | 0.0005 * |
| +NA       | -0.17   | 0.9978   |
| -NA       | -0.19   | 1.0000   |

Positive values show pairs of means that are significantly different.

**Oneway Analysis of xanthine By Label****Means Comparisons****Comparisons with a control using Dunnett's Method**

Control Group = -NA

|         |       |
|---------|-------|
| d       | Alpha |
| 2.65691 | 0.05  |

| Level   | Abs(Dif)-<br>LSD | p-Value |
|---------|------------------|---------|
| 5nM+NA  | -0.52            | 0.9994  |
| 5nM-NA  | -0.55            | 1.0000  |
| -NA     | -0.57            | 1.0000  |
| 50nM+NA | -0.56            | 1.0000  |
| 50nM-NA | -0.5             | 0.9965  |
| +NA     | -0.5             | 0.9957  |

Positive values show pairs of means that are significantly different.

**Oneway Analysis of Xanthurenic acid By Label****Means Comparisons****Comparisons with a control using Dunnett's Method**

Control Group = -NA

|           | d       | Alpha   |
|-----------|---------|---------|
|           | 2.65691 | 0.05    |
| Abs(Dif)- |         |         |
| Level     | LSD     | p-Value |
| 50nM-NA   | -0.11   | 0.1048  |
| 5nM-NA    | -0.21   | 0.2027  |
| 50nM+NA   | -0.46   | 0.6562  |
| 5nM+NA    | -0.52   | 0.7952  |
| -NA       | -0.82   | 1.0000  |
| +NA       | -3e-3   | 0.0509  |

Positive values show pairs of means that are significantly different.
